# Supplementary material for: SOX2 Co-Occupies Distal Enhancer Elements with Distinct POU Factors in ESCs and NPCs to Specify Cell State
Source: PLoS Genet. 2013 Feb 21;9(2):e1003288. doi: 10.1371/journal.pgen.1003288 (PMC3578749; doi:10.1371/journal.pgen.1003288)
Supplement: Table S1 — ChIP-Seq bound regions for all experiments. ChIP-Seq bound regions called for SOX2 and OCT4 in ESCs, SOX2 and BRN2 in NPCs, and SOX2, BRN2 H3K4me1, and H3K27Ac in TetO-Brn2 and control cells. (XLSX) [file pgen.1003288.s006.xlsx]

## Sheet: Key
Table S1
ChIP-Seq bound regions for indicated datasets in this manuscript
Tab	Description
SOX2 ESC	SOX2 ChIP-Seq in undifferentiated V6.5 (C57/B6-129SvJae F1 intercross) ESCs
OCT4 ESC	OCT4 ChIP-Seq in undifferentiated V6.5 (C57/B6-129SvJae F1 intercross) ESCs
SOX2 NPC	SOX2 ChIP-Seq in in vitro derived NPCs from undifferentiated V6.5 (C57/B6-129SvJae F1 intercross) ESCs
BRN2 NPC	BRN2 ChIP-Seq in in vitro derived NPCs from undifferentiated V6.5 (C57/B6-129SvJae F1 intercross) ESCs
SOX2 Day2 Diff. TetO-Brn2	SOX2 ChIP-Seq in Day 2 differentiating ESCs in TetO-Brn2 cells with rtta and dox (referred to in Figure 4)
SOX2 Day2 Diff. rtta	SOX2 ChIP-Seq in Day 2 differentiating ESCs in rtta cells with dox (referred to in Figure 4)
BRN2 Day2 Diff. TetO-Brn2	BRN2 ChIP-Seq in Day 2 differentiating ESCs in TetO-Brn2 cells with rtta and dox (referred to in Figure 4)
BRN2 Day2 Diff. rtta	BRN2 ChIP-Seq in Day 2 differentiating ESCs in rtta cells with dox (referred to in Figure 4)
H3K27Ac Day2 Diff. TetO-Brn2	H3K27Ac ChIP-Seq in Day 2 differentiating ESCs in TetO-Brn2 cells with rtta and dox (referred to in Figure 4)
H3K27Ac Day2 Diff. rtta	H3K27Ac ChIP-Seq in Day 2 differentiating ESCs in rtta cells with dox (referred to in Figure 4)
H3K4me1 Day2 Diff. TetO-Brn2	H3K4me1 ChIP-Seq in Day 2 differentiating ESCs in TetO-Brn2 cells with rtta and dox (referred to in Figure 4)
H3K4me1 Day2 Diff. rtta	H3K4me1 ChIP-Seq in Day 2 differentiating ESCs in rtta cells with dox (referred to in Figure 4)
Column	Description
CHROM	Chromosome
START	Start of Bound Region
END	End of Bound Region
LENGTH	Length of Bound Region in Base Pairs
PEAK POS	Position of Peak within Bound Region
PEAK HEIGHT	Height of Peak in Reads
TOTAL TARGET COUNTS	Number of Reads within Bound Region in Experimental ChIP-Seq
TOTAL BACKGROUND COUNTS	Number of Reads within Bound Region in Background Dataset (WCE or H3-ChIP-Seq)

## Sheet: SOX2 ESC
CHROM	START	END	LENGTH	PEAK POS	PEAK HEIGHT	TOTAL TARGET COUNTS	TOTAL BACKGROUND COUNTS
1	3052925	3053150	225	3053062	26	182	12
1	3472925	3473275	350	3473087	68	629	38.7
1	3639050	3639350	300	3639212	28	261	17.3
1	3671600	3671850	250	3671762	23	193	27.2
1	3904125	3904550	425	3904287	56	616	33.2
1	3984900	3985125	225	3984987	28	199	19.7
1	4141000	4141175	175	4141062	19	110	11.2
1	4588675	4588700	25	4588687	13	13	2.4
1	4792600	4792850	250	4792662	46	358	14.7
1	4793150	4793375	225	4793237	22	173	28.5
1	4845450	4845850	400	4845712	52	552	59.2
1	4872050	4872075	25	4872062	13	13	1
1	4924325	4924425	100	4924362	15	56	8.1
1	4960750	4960875	125	4960837	33	151	24.7
1	4961200	4961275	75	4961237	15	43	7.4
1	4962375	4962825	450	4962562	87	869	41.3
1	5013075	5013125	50	5013087	13	26	4.5
1	5124950	5125075	125	5124962	18	81	15.4
1	5127325	5127350	25	5127337	13	13	2.1
1	5218000	5218175	175	5218062	15	100	11
1	5222950	5223175	225	5223062	30	225	33.7
1	5252475	5252575	100	5252487	13	51	5.4
1	6049175	6049500	325	6049337	39	340	16.9
1	6132950	6133125	175	6132987	19	118	18.7
1	6272400	6272625	225	6272512	21	156	12.8
1	6438250	6439300	1050	6439012	60	1251	81.3
1	6448050	6448425	375	6448212	46	460	40.9
1	6719475	6719500	25	6719487	13	13	1.1
1	6860525	6860700	175	6860612	23	138	14.1
1	7037425	7037600	175	7037487	31	194	30.3
1	7058825	7059075	250	7058937	22	171	10.3
1	7080325	7080375	50	7080337	14	27	4.3
1	7197125	7197200	75	7197162	17	46	2.9
1	7302550	7302750	200	7302587	20	149	12.3
1	7303350	7303750	400	7303512	50	536	43.4
1	7309275	7309600	325	7309412	28	282	23.6
1	7441675	7441900	225	7441787	20	149	15.5
1	7576400	7576550	150	7576437	16	88	5.2
1	7661575	7661775	200	7661737	22	156	17.9
1	7722675	7723000	325	7722837	44	397	27.9
1	8087000	8087150	150	8087112	15	85	7.7
1	8571775	8572100	325	8571962	39	316	11.2
1	8926000	8926150	150	8926037	19	104	7.8
1	8930850	8931025	175	8930937	15	99	4.6
1	9428225	9428500	275	9428362	41	335	27.5
1	9687150	9687475	325	9687337	62	551	57.1
1	9894375	9894575	200	9894462	22	154	22.1
1	9940200	9940500	300	9940337	26	234	18.9
1	10016950	10017075	125	10016987	19	84	12.3
1	10462175	10462250	75	10462187	13	39	5.4
1	10635925	10636100	175	10635987	19	110	7.4
1	10838225	10838450	225	10838287	19	159	14.2
1	10839775	10840100	325	10839937	31	290	12.4
1	10863450	10863825	375	10863612	48	457	30
1	11009975	11010050	75	11009987	14	40	1.5
1	11067375	11067675	300	11067537	41	322	10.5
1	11081875	11082075	200	11081987	16	114	3.6
1	11136700	11136875	175	11136837	22	135	24
1	11236375	11236450	75	11236387	13	39	3.1
1	11262900	11263500	600	11263237	76	974	63.7
1	11315375	11315700	325	11315537	42	382	46.6
1	11380700	11380975	275	11380862	37	321	21.2
1	11381250	11381450	200	11381387	22	157	16.2
1	11399350	11399450	100	11399362	13	51	8.5
1	11447050	11447125	75	11447062	13	39	4.3
1	11486825	11487150	325	11486987	51	476	38.7
1	11733725	11733950	225	11733862	25	182	21.5
1	12011125	12011350	225	12011287	24	192	22.5
1	12572375	12572400	25	12572387	13	13	1.1
1	12622000	12622250	250	12622137	34	267	32.7
1	12677125	12677425	300	12677312	27	251	38.1
1	12729700	12730450	750	12729887	75	1359	141.2
1	12748375	12748525	150	12748462	19	97	16.5
1	12767325	12767350	25	12767337	13	13	1.8
1	12767850	12767975	125	12767887	18	81	10.2
1	12795625	12795825	200	12795737	20	143	22.9
1	12820475	12820575	100	12820512	15	59	10.6
1	12821300	12821600	300	12821412	38	316	35.1
1	12976250	12976550	300	12976362	32	303	32.4
1	13001050	13001225	175	13001087	20	121	15.2
1	13044900	13045150	250	13045012	30	239	23
1	13059575	13060325	750	13059812	135	1735	97.6
1	13066250	13066325	75	13066262	20	57	10.5
1	13067050	13067100	50	13067062	13	26	3.6
1	13069900	13070550	650	13070287	71	1174	91.2
1	13079825	13080175	350	13079937	38	377	26.3
1	13113350	13113475	125	13113362	16	74	10.9
1	13117275	13117500	225	13117412	26	202	21.6
1	13440850	13441075	225	13440937	31	224	12.6
1	13645900	13646075	175	13646012	18	111	17.2
1	13857800	13858000	200	13857862	18	130	11
1	13986400	13986575	175	13986462	21	119	9.2
1	14174950	14175100	150	14175037	17	90	10.6
1	14210725	14210975	250	14210837	28	230	16.1
1	14277550	14277750	200	14277612	28	194	26.7
1	14297750	14298025	275	14297862	37	306	27.1
1	14406425	14406500	75	14406437	14	40	3.5
1	14617325	14617375	50	14617337	13	26	1.3
1	14635625	14635850	225	14635687	22	156	11.2
1	14742525	14742625	100	14742562	15	58	8.7
1	15774350	15774800	450	15774487	28	361	37.3
1	15776700	15777275	575	15777037	79	914	73.9
1	16115150	16115525	375	16115337	91	848	46.2
1	17235950	17236275	325	17236087	41	360	33.4
1	17412025	17412100	75	17412037	14	41	4.9
1	17516575	17516700	125	17516662	17	75	6
1	17672275	17672475	200	17672412	23	147	8
1	18254125	18254275	150	18254237	16	88	4.3
1	18272725	18272825	100	18272762	16	55	8.5
1	18624800	18624825	25	18624812	13	13	0.8
1	19092500	19092725	225	19092537	20	151	20.8
1	20745650	20745700	50	20745687	15	28	4.2
1	20746575	20746875	300	20746737	39	351	29.9
1	20805375	20805400	25	20805387	13	13	2.4
1	20852450	20852825	375	20852637	71	699	46.9
1	20853250	20853375	125	20853287	27	125	22.5
1	20890900	20891100	200	20891012	20	143	22.9
1	20893775	20894000	225	20893837	28	227	34.5
1	20940100	20940350	250	20940212	26	200	22.8
1	20960000	20960250	250	20960137	31	236	25
1	21216850	21217150	300	21217037	21	195	22.5
1	21241675	21241900	225	21241762	29	218	26.7
1	22362500	22362725	225	22362612	25	191	21.5
1	22420925	22421375	450	22421087	59	612	10.1
1	23997425	23997550	125	23997462	18	81	12.6
1	24957425	24957650	225	24957462	24	186	8.5
1	25126425	25126700	275	25126562	35	284	20.7
1	25832625	25832825	200	25832737	19	135	11
1	26174300	26174600	300	26174437	33	292	21.9
1	26472500	26472550	50	26472512	13	26	3.9
1	26852525	26852675	150	26852612	16	89	8.5
1	30461975	30462150	175	30462012	19	119	4.3
1	30749525	30749800	275	30749712	27	230	26.7
1	30792400	30792500	100	30792437	18	66	10.9
1	31178125	31178550	425	31178412	49	529	24.6
1	31623300	31623350	50	31623312	13	26	0.8
1	33216150	33216175	25	33216162	13	13	2
1	33439400	33439625	225	33439487	22	156	19.4
1	33500375	33500500	125	33500462	14	66	9.9
1	33687225	33687300	75	33687237	15	42	7.1
1	33775200	33775350	150	33775212	14	77	13.5
1	33950300	33950450	150	33950412	35	189	25.7
1	33951575	33951875	300	33951712	55	490	56.6
1	33990325	33990350	25	33990337	15	15	2.7
1	34010250	34010450	200	34010337	24	156	24.6
1	34016000	34016025	25	34016012	14	14	2.4
1	34018850	34019250	400	34019137	44	404	38.5
1	34047625	34048025	400	34047862	55	535	55.6
1	34048300	34048600	300	34048412	36	363	53.8
1	34085350	34085500	150	34085387	26	138	17.7
1	34128150	34128250	100	34128162	14	55	10.6
1	34347250	34347275	25	34347262	15	15	2
1	34377250	34377375	125	34377262	15	71	12.6
1	34413075	34413375	300	34413212	47	389	22.9
1	34491650	34491850	200	34491737	21	133	8.2
1	34684375	34684425	50	34684387	13	26	4.9
1	35060200	35060425	225	35060337	24	177	19.4
1	35177075	35177600	525	35177312	61	867	55
1	35642275	35642750	475	35642587	50	606	49.3
1	35694800	35695025	225	35694937	21	165	15.1
1	35756150	35756200	50	35756162	13	26	4.7
1	35888875	35889225	350	35889062	95	839	61.9
1	35959125	35959150	25	35959137	15	15	2.7
1	35961800	35962000	200	35961962	21	149	26.1
1	35999175	35999200	25	35999187	13	13	2.5
1	36005625	36006000	375	36005787	84	879	73.2
1	36007775	36007900	125	36007787	22	109	20.8
1	36009400	36009525	125	36009462	23	107	17.9
1	36029825	36029850	25	36029837	15	15	2.8
1	36184875	36184925	50	36184887	15	30	5.2
1	36196125	36196250	125	36196162	16	75	11
1	36501700	36501800	100	36501712	18	60	9.6
1	36510975	36511025	50	36510987	14	27	4.5
1	36590700	36590775	75	36590712	13	39	3.2
1	36748775	36748825	50	36748787	15	29	5.4
1	36798675	36798800	125	36798687	13	60	7
1	36835525	36835550	25	36835537	13	13	2
1	36907475	36907650	175	36907512	24	160	24
1	36927050	36927275	225	36927187	36	261	40.8
1	36927500	36927525	25	36927512	16	16	3.1
1	36930325	36930850	525	36930537	238	2536	92.2
1	36931500	36931700	200	36931587	38	272	37.6
1	36932325	36932675	350	36932487	87	803	66.3
1	36946375	36946400	25	36946387	19	19	3.8
1	36993700	36994050	350	36993862	45	409	38.7
1	37046450	37046525	75	37046462	24	68	12.1
1	37074775	37074925	150	37074787	29	137	22.1
1	37157050	37157225	175	37157137	23	136	21.2
1	37487575	37487725	150	37487662	16	85	11.7
1	37615925	37616100	175	37615987	26	155	25.4
1	37635375	37635400	25	37635387	13	13	2.2
1	37834925	37835025	100	37835012	25	91	16.9
1	37872900	37873075	175	37872987	17	102	17.7
1	38002975	38003250	275	38003137	26	214	37.3
1	38236150	38236325	175	38236212	19	116	12.7
1	38264350	38264550	200	38264437	19	126	14.1
1	38566575	38566600	25	38566587	19	19	3.8
1	38741575	38741600	25	38741587	13	13	2.4
1	38768525	38768925	400	38768587	20	237	40.8
1	38814000	38814150	150	38814087	25	139	22.5
1	38848625	38848725	100	38848687	18	65	9.6
1	39067275	39067375	100	39067337	20	70	12.7
1	39306975	39307000	25	39306987	13	13	1.8
1	39369150	39369225	75	39369162	14	41	3.8
1	39472825	39473225	400	39473062	89	813	37.1
1	39478625	39478650	25	39478637	17	17	3.1
1	39645125	39645375	250	39645237	28	222	16.1
1	39845200	39845325	125	39845237	16	73	3.9
1	39847200	39847650	450	39847462	61	685	69.3
1	39868475	39868650	175	39868587	18	109	17.7
1	40247775	40247875	100	40247812	15	55	9.1
1	40624725	40624875	150	40624762	16	86	15.9
1	41076000	41076250	250	41076162	24	192	22.1
1	41085075	41085425	350	41085262	75	672	38.7
1	41334825	41335150	325	41334962	54	484	35.1
1	42003050	42003425	375	42003237	76	719	35.6
1	42052100	42052300	200	42052212	21	133	18
1	42130875	42131125	250	42131012	26	199	16.5
1	42581350	42581650	300	42581487	36	307	10.1
1	43038750	43039075	325	43038937	44	392	34.6
1	43764725	43764825	100	43764762	17	59	6.7
1	44557875	44558425	550	44558062	59	680	47.2
1	44836175	44836500	325	44836362	74	636	20.9
1	45302650	45302825	175	45302787	18	112	7.4
1	45304325	45304475	150	45304337	16	90	10.2
1	45352225	45352525	300	45352387	36	318	19.6
1	45519900	45519925	25	45519912	13	13	2.1
1	46798150	46798400	250	46798287	24	191	24.3
1	46803025	46803250	225	46803087	25	181	20.1
1	46808100	46808275	175	46808137	17	107	10.2
1	46860850	46861150	300	46861037	31	275	20.4
1	46866175	46866525	350	46866362	36	364	54
1	46908625	46908800	175	46908687	15	96	10.9
1	47021025	47021250	225	47021162	31	223	18.4
1	47251775	47251850	75	47251812	15	43	1.8
1	50582800	50582850	50	50582812	14	27	2.8
1	51174800	51174975	175	51174912	21	123	11.3
1	51480500	51481100	600	51480762	67	845	66.9
1	51493500	51493625	125	51493537	15	68	4.7
1	51517575	51517775	200	51517637	26	168	24.4
1	51569175	51569425	250	51569362	17	143	24.9
1	51703400	51703450	50	51703412	13	26	4.6
1	51824000	51824150	150	51824087	16	92	14
1	51851125	51851275	150	51851187	20	103	9.5
1	51876175	51876500	325	51876337	39	379	33.4
1	51953725	51953975	250	51953812	37	268	26.5
1	52058425	52058600	175	52058462	14	95	16.2
1	52063825	52063875	50	52063837	13	26	4.6
1	52161325	52161525	200	52161462	17	117	15.4
1	52177975	52178175	200	52178012	23	164	25.8
1	52472225	52472525	300	52472337	24	225	24
1	52601275	52601400	125	52601362	18	83	9.2
1	52808800	52809150	350	52808962	63	589	31
1	52897675	52898425	750	52898212	110	1303	116.3
1	53154700	53155075	375	53154887	64	625	45.7
1	53525875	53526075	200	53525987	24	164	17.9
1	53694450	53694825	375	53694637	47	451	24.4
1	53695700	53695725	25	53695712	13	13	2.1
1	54194950	54195225	275	54195137	33	295	42.9
1	54328875	54329150	275	54329012	29	222	20.9
1	54344200	54344450	250	54344337	26	209	18.3
1	54388325	54388475	150	54388337	18	105	18
1	54429175	54429925	750	54429687	130	2122	118
1	54530100	54530425	325	54530237	55	490	48.7
1	54621675	54621775	100	54621712	15	57	9.8
1	54761600	54761750	150	54761637	20	103	16.2
1	54984650	54984750	100	54984687	16	60	9.4
1	55032550	55032575	25	55032562	13	13	2.2
1	55053075	55053400	325	55053212	57	500	40.1
1	55075375	55075525	150	55075412	21	121	21.4
1	55131500	55131700	200	55131612	28	189	25.1
1	55143100	55143450	350	55143287	42	399	28.6
1	55150375	55150600	225	55150487	29	219	23.7
1	55170525	55170750	225	55170637	28	194	21.4
1	55845450	55845525	75	55845462	17	46	5.9
1	55910900	55911050	150	55910962	21	105	5.3
1	56613375	56613450	75	56613437	14	39	7.7
1	56629000	56629250	250	56629137	31	254	17.9
1	56641975	56642375	400	56642187	49	521	33.9
1	56668225	56668575	350	56668412	28	298	22.6
1	56789125	56789350	225	56789212	30	210	18.2
1	56883075	56883300	225	56883162	25	191	12.3
1	56898150	56898200	50	56898162	13	26	2.2
1	57226225	57226375	150	57226262	17	91	2.1
1	57414875	57415350	475	57415062	52	643	37.7
1	57551625	57551750	125	57551737	17	75	13.8
1	57556825	57556900	75	57556862	15	44	7.4
1	57933525	57933800	275	57933637	41	343	33
1	57940175	57940350	175	57940237	21	135	20.7
1	57942825	57943025	200	57942912	22	152	17.2
1	58133075	58133425	350	58133262	43	407	42.9
1	58307150	58307250	100	58307212	15	55	6.6
1	58369150	58369300	150	58369237	19	103	4.9
1	58515025	58515300	275	58515162	29	244	20.7
1	58634025	58634200	175	58634087	23	142	13.3
1	58707250	58707400	150	58707287	17	97	5
1	58917900	58917925	25	58917912	13	13	2.5
1	59259625	59259825	200	59259687	28	190	26.7
1	59367675	59368125	450	59367887	74	807	60.2
1	59393000	59393300	300	59393187	51	454	42.7
1	59393525	59393550	25	59393537	19	19	3.5
1	59417500	59417750	250	59417512	17	149	15.2
1	59426475	59426625	150	59426537	24	136	23
1	59430050	59430150	100	59430137	20	74	13.8
1	59431925	59432200	275	59432087	42	341	38.4
1	59452975	59453125	150	59453037	17	96	18
1	59642275	59642575	300	59642462	21	177	14.9
1	59673025	59673050	25	59673037	14	14	2.8
1	59673275	59673475	200	59673287	17	96	16.6
1	59770850	59771050	200	59770987	20	132	13.5
1	60001000	60001050	50	60001037	15	28	4.5
1	60371150	60371250	100	60371187	19	70	12
1	60377175	60377325	150	60377262	21	116	17.3
1	60486050	60486100	50	60486062	14	28	2.1
1	60783700	60783900	200	60783812	23	172	26.7
1	60795475	60795875	400	60795637	74	803	81.3
1	60798125	60798200	75	60798187	30	87	15.8
1	62107475	62107500	25	62107487	19	19	3.8
1	62115900	62116425	525	62116137	57	761	56.1
1	62332575	62332850	275	62332687	25	215	35.5
1	62670875	62671150	275	62670987	25	211	35.9
1	62672150	62672425	275	62672287	37	298	37.3
1	62701800	62702200	400	62702037	43	579	72.9
1	62706825	62706925	100	62706837	25	85	14.5
1	62717800	62718200	400	62718037	77	796	66.2
1	62861775	62862025	250	62861887	22	165	8.8
1	63000500	63000600	100	63000537	15	58	6.4
1	63072275	63072625	350	63072462	31	328	50.1
1	63134400	63134575	175	63134562	20	126	20.2
1	63136075	63136225	150	63136137	26	141	20.1
1	63144625	63144675	50	63144662	23	45	8.8
1	63181650	63182000	350	63181812	83	789	61.6
1	63376450	63376725	275	63376612	45	368	30.3
1	63872100	63872175	75	63872137	14	41	6.1
1	63943375	63943600	225	63943462	27	202	14.5
1	64056400	64056700	300	64056562	29	267	35.1
1	64141575	64141700	125	64141637	17	76	6.3
1	64350200	64350400	200	64350312	20	130	20
1	64510950	64511275	325	64511137	28	290	24.4
1	64589800	64589925	125	64589862	18	80	10.9
1	64593750	64593975	225	64593887	21	161	21.8
1	64664475	64664525	50	64664512	14	27	4.9
1	64666900	64667225	325	64667062	28	302	40.8
1	64667800	64668125	325	64667962	68	579	47.5
1	64714250	64714375	125	64714262	16	70	11
1	64773625	64773800	175	64773687	17	111	11.5
1	64819200	64819650	450	64819462	64	685	44.3
1	64851225	64851475	250	64851337	29	215	24.9
1	64916525	64916825	300	64916687	27	261	31.6
1	64972075	64972100	25	64972087	14	14	1.5
1	64980775	64980950	175	64980812	15	100	16.9
1	65002150	65002425	275	65002287	26	216	26
1	65046475	65046500	25	65046487	13	13	2.2
1	65113350	65113400	50	65113362	17	34	6.3
1	65227150	65227275	125	65227212	15	70	7.7
1	65305250	65305450	200	65305337	22	157	20.8
1	65356925	65357000	75	65356987	15	41	5.6
1	65734600	65734875	275	65734712	32	270	21.2
1	66199600	66199825	225	66199687	22	159	16.9
1	66282750	66282875	125	66282812	16	73	10.8
1	66633175	66633375	200	66633337	26	174	7.5
1	66894075	66894375	300	66894237	42	407	43
1	67114500	67114525	25	67114512	13	13	1.7
1	67240875	67241050	175	67240962	17	112	13
1	67868900	67869300	400	67869112	75	765	40.9
1	68237675	68237700	25	68237687	13	13	1.4
1	68267025	68267125	100	68267037	13	51	5.2
1	69393200	69393450	250	69393337	31	239	22.3
1	69801150	69801300	150	69801162	14	78	6.8
1	70951475	70951500	25	70951487	13	13	2
1	70968775	70969150	375	70968962	57	553	34.9
1	71051825	71051850	25	71051837	13	13	1.4
1	71174800	71174875	75	71174837	16	45	4.2
1	71440550	71440625	75	71440562	15	45	6.7
1	71543475	71543675	200	71543562	21	145	17.5
1	71579150	71579525	375	71579337	72	668	48.2
1	71583925	71584325	400	71584112	34	416	63.5
1	71606800	71607075	275	71606887	41	347	41.3
1	72147325	72147500	175	72147387	37	219	33.7
1	72159525	72159875	350	72159637	29	341	40.9
1	72162125	72162675	550	72162362	209	2055	65.6
1	72170375	72170575	200	72170487	17	115	15.4
1	72175950	72176250	300	72176087	47	410	27.5
1	72177500	72177625	125	72177612	20	85	13
1	72188350	72188375	25	72188362	14	14	2.7
1	72198750	72198850	100	72198837	18	67	13.4
1	72240550	72240675	125	72240587	41	178	31.3
1	72246300	72246475	175	72246412	35	211	28.9
1	72424100	72424225	125	72424137	18	77	10.8
1	72516300	72516500	200	72516412	50	337	43.9
1	72605425	72605800	375	72605637	42	436	28.5
1	72726475	72726700	225	72726537	29	231	15.1
1	72738675	72738875	200	72738787	25	163	26.1
1	72739450	72739700	250	72739537	42	354	41.6
1	72761250	72761525	275	72761412	36	317	38.1
1	72893600	72893875	275	72893762	39	339	34.2
1	73433950	73434150	200	73434012	21	153	23.7
1	73576050	73576150	100	73576087	15	57	9.1
1	73814100	73814125	25	73814112	13	13	1.5
1	74044550	74044800	250	74044662	42	311	38.4
1	74388900	74389100	200	74388962	24	163	17.3
1	74439875	74439900	25	74439887	14	14	1.8
1	74515900	74516050	150	74515962	22	114	19.4
1	74758125	74758500	375	74758312	120	1179	80.7
1	74792725	74792800	75	74792737	15	42	6.7
1	74960350	74960400	50	74960362	14	27	2.5
1	75105100	75105125	25	75105112	14	14	1.5
1	75110800	75111050	250	75110962	29	214	27.7
1	75326325	75326475	150	75326387	15	85	11.6
1	75395175	75395475	300	75395337	33	309	35.2
1	75472125	75472400	275	75472287	29	236	39.1
1	75499950	75500150	200	75500087	22	152	16.1
1	75545850	75546050	200	75545937	29	203	29.3
1	75551150	75551175	25	75551162	13	13	2.4
1	75680975	75681125	150	75681037	18	99	10.8
1	75687525	75687950	425	75687762	62	647	55
1	75745950	75746150	200	75746012	21	157	10.1
1	75771675	75772075	400	75771837	27	333	51.1
1	75880325	75880625	300	75880462	39	321	20.2
1	75912100	75912500	400	75912187	24	312	32.1
1	75919500	75919525	25	75919512	13	13	2
1	77323625	77323850	225	77323737	26	187	24.4
1	77324850	77324900	50	77324862	13	26	4.5
1	77330300	77330525	225	77330387	27	214	25.8
1	77335825	77336200	375	77336012	66	609	26.3
1	77337050	77337325	275	77337187	29	267	35.1
1	77339750	77339925	175	77339887	21	124	12.7
1	77344875	77345250	375	77345037	38	439	59.1
1	77355825	77356100	275	77355962	38	304	28.6
1	77386200	77386275	75	77386212	14	42	7.4
1	77396050	77396275	225	77396162	27	199	18.9
1	77512975	77513350	375	77513162	68	634	34.1
1	78003050	78003400	350	78003212	102	905	29.9
1	78051125	78051425	300	78051262	43	379	29.6
1	78303575	78303700	125	78303662	15	68	12.7
1	78528400	78528500	100	78528412	15	56	10.9
1	79257525	79257725	200	79257662	20	141	6.8
1	79319000	79319025	25	79319012	14	14	2.8
1	79460400	79460425	25	79460412	15	15	2.9
1	80115250	80115275	25	80115262	13	13	2.5
1	80116425	80116850	425	80116587	97	990	44.3
1	80194850	80195175	325	80194987	40	374	11.5
1	80282525	80282875	350	80282687	62	563	36.7
1	81472475	81472525	50	81472487	13	26	3.9
1	82699750	82699875	125	82699762	15	71	13.4
1	82720050	82720250	200	82720112	17	119	13.1
1	82746125	82746225	100	82746187	16	62	7.8
1	84096900	84096975	75	84096962	17	47	8.5
1	84284600	84284825	225	84284637	21	160	22.2
1	84286075	84286150	75	84286087	15	42	7.5
1	84428675	84428925	250	84428787	24	185	16.5
1	84516450	84516500	50	84516462	16	30	4.9
1	84519500	84519525	25	84519512	14	14	2.1
1	84610900	84611025	125	84610962	15	74	12.7
1	84718400	84718575	175	84718462	21	134	12.3
1	84739850	84740025	175	84739937	29	181	33.5
1	84746075	84746300	225	84746187	24	176	30.6
1	84750875	84751475	600	84751187	35	633	114.5
1	87890600	87890775	175	87890712	28	163	25.6
1	88018850	88019375	525	88019137	81	922	69.7
1	88032600	88032850	250	88032687	29	223	32.4
1	88067775	88068025	250	88067862	31	238	42
1	88134525	88134600	75	88134537	14	41	7.7
1	88140375	88140775	400	88140587	98	984	67.9
1	88142050	88142500	450	88142262	114	1221	98.3
1	88142800	88142825	25	88142812	15	15	2.5
1	88179950	88180150	200	88180087	22	150	22.3
1	88190650	88190775	125	88190662	17	75	12.6
1	88273750	88273850	100	88273837	19	69	11.6
1	88304375	88304525	150	88304387	22	116	17.6
1	88318575	88318775	200	88318612	23	180	27.7
1	88320075	88320200	125	88320112	48	221	39.7
1	88335250	88335525	275	88335387	30	247	24.4
1	88357575	88357925	350	88357762	79	698	52.9
1	88381450	88381550	100	88381487	15	58	6.4
1	88749250	88749475	225	88749337	22	165	8.9
1	89056175	89056250	75	89056187	13	38	7.4
1	89057525	89057975	450	89057762	144	1525	68.6
1	89061775	89062100	325	89061937	103	877	67.2
1	89128675	89128725	50	89128687	14	28	4.2
1	89144400	89144550	150	89144512	29	166	28.2
1	89145500	89145525	25	89145512	15	15	2.8
1	89518350	89518450	100	89518362	15	56	10.8
1	89553475	89553600	125	89553512	21	93	16.8
1	89560200	89560625	425	89560437	67	709	54
1	90298000	90298100	100	90298087	17	62	9.9
1	90393750	90393775	25	90393762	22	22	4.2
1	90440175	90440325	150	90440187	28	127	23.3
1	90500025	90500450	425	90500212	55	568	65.9
1	90605500	90605700	200	90605612	24	162	15.1
1	90631750	90631850	100	90631837	23	84	16.8
1	90638100	90638150	50	90638112	18	35	5.6
1	90639000	90639275	275	90639137	35	302	38.5
1	90644550	90644600	50	90644562	16	32	5.6
1	90755475	90755650	175	90755537	21	130	17.9
1	90781150	90781250	100	90781187	18	64	8.7
1	90788650	90788825	175	90788662	14	94	16.6
1	91020450	91020625	175	91020587	20	132	22.5
1	91113800	91113975	175	91113887	19	111	11.9
1	91296750	91296900	150	91296862	20	104	18.2
1	91691475	91691700	225	91691587	27	205	26.5
1	91701775	91702150	375	91701937	66	657	57.5
1	91707625	91708025	400	91707737	57	637	64.5
1	91754050	91754075	25	91754062	13	13	1.5
1	91765950	91766250	300	91766062	32	295	37.6
1	91767125	91767275	150	91767212	19	95	11.5
1	92236425	92236550	125	92236462	17	81	11.2
1	92323900	92324100	200	92323987	21	146	19.1
1	92349825	92350050	225	92349862	24	176	27.1
1	92358550	92358600	50	92358587	16	30	5.6
1	92375325	92375350	25	92375337	14	14	2.7
1	92459050	92459100	50	92459087	15	29	1.3
1	92731675	92731900	225	92731812	23	175	17.6
1	92869150	92869350	200	92869187	28	183	24.7
1	92967175	92967200	25	92967187	13	13	2.1
1	93142000	93142050	50	93142012	13	26	3.9
1	93243550	93243775	225	93243662	29	214	27
1	93244550	93244750	200	93244662	22	139	14.8
1	93289825	93290000	175	93289887	17	110	9.2
1	93367825	93368075	250	93367962	25	197	10.8
1	93949825	93949875	50	93949862	14	27	5.3
1	94013975	94014000	25	94013987	14	14	2.8
1	94262575	94262850	275	94262687	50	410	40.9
1	94350550	94350725	175	94350612	16	100	12.3
1	94537950	94538075	125	94537987	18	81	12.3
1	95103100	95103125	25	95103112	13	13	1.8
1	95438175	95438200	25	95438187	14	14	2
1	95568225	95568400	175	95568287	14	95	14.7
1	96823950	96824050	100	96823987	14	52	6.3
1	96861025	96861275	250	96861137	23	178	8.1
1	97103725	97104100	375	97103887	34	360	20.8
1	97432450	97432800	350	97432637	30	312	13.4
1	97585150	97585175	25	97585162	13	13	2.4
1	98313300	98313500	200	98313437	26	184	12
1	98577200	98577400	200	98577287	20	133	14
1	98705075	98705400	325	98705237	67	581	35.1
1	98706525	98706700	175	98706637	17	101	15.4
1	99453175	99453550	375	99453387	51	497	39.5
1	99651750	99651775	25	99651762	13	13	1.8
1	99903550	99903900	350	99903712	46	442	44.7
1	99916900	99917175	275	99917012	40	325	27
1	100498150	100498175	25	100498162	13	13	0.8
1	101800975	101801225	250	101801137	26	207	23
1	102618000	102618175	175	102618062	16	107	7.4
1	102708175	102708650	475	102708437	58	807	50.3
1	102958750	102958775	25	102958762	13	13	0.7
1	103456050	103456400	350	103456237	46	443	30.4
1	103584200	103584400	200	103584262	20	141	14
1	103584725	103585025	300	103584887	53	435	25.8
1	103601300	103601400	100	103601312	13	50	4.2
1	103746375	103746700	325	103746512	23	240	18.3
1	104178250	104178450	200	104178287	17	124	4.2
1	104921450	104921850	400	104921662	44	495	21.6
1	105299125	105299325	200	105299212	22	150	11.9
1	105300150	105300375	225	105300237	20	143	14.8
1	105567975	105568050	75	105567987	13	39	2.5
1	106665600	106665975	375	106665787	40	406	32.1
1	106815100	106815300	200	106815187	23	155	18.3
1	106840175	106840450	275	106840362	37	315	30.2
1	106898625	106898825	200	106898712	17	124	19.1
1	106922550	106922950	400	106922737	57	574	26
1	107318975	107319200	225	107319112	26	188	19.1
1	108004575	108004625	50	108004587	13	26	3.5
1	108027300	108027400	100	108027337	15	57	9.6
1	108049575	108049800	225	108049662	25	180	23.9
1	108172650	108172700	50	108172662	15	29	2.7
1	108342025	108342050	25	108342037	13	13	1.7
1	108392075	108392275	200	108392162	20	141	15.8
1	108549700	108549800	100	108549737	22	87	15.9
1	108587375	108587500	125	108587462	19	84	14.2
1	109805975	109806325	350	109806137	42	449	47.1
1	110376275	110376575	300	110376462	46	410	10.3
1	112486925	112486950	25	112486937	13	13	1.3
1	112602475	112602700	225	112602562	30	228	21.5
1	112618175	112618475	300	112618362	49	417	35.5
1	115786875	115787075	200	115786962	20	136	9.6
1	115791625	115792350	725	115792212	28	543	53.8
1	116469550	116469600	50	116469562	14	27	3.9
1	116677200	116677550	350	116677362	40	362	13.1
1	118194425	118194700	275	118194537	26	229	25.1
1	118882500	118882575	75	118882537	14	40	5.4
1	119118350	119118650	300	119118487	31	267	14.4
1	119285400	119285550	150	119285437	21	113	16.6
1	119286825	119286925	100	119286912	15	57	5.3
1	120056325	120056400	75	120056337	14	40	3.9
1	120195600	120195725	125	120195637	14	66	9.9
1	120239175	120239375	200	120239337	16	106	12
1	120452925	120453350	425	120453162	61	679	34.1
1	120470200	120470375	175	120470312	20	125	22.6
1	120475600	120475900	300	120475712	47	424	46.2
1	120517425	120517475	50	120517437	24	47	8.9
1	120557650	120557775	125	120557737	14	62	8.8
1	120604100	120604275	175	120604237	28	146	22.2
1	120738675	120739000	325	120738812	34	333	41.6
1	120831425	120831500	75	120831487	15	43	7.5
1	120876575	120876925	350	120876737	101	953	67.9
1	120877550	120877675	125	120877612	17	76	13.3
1	120903475	120903950	475	120903712	54	597	64.9
1	120904475	120904500	25	120904487	14	14	2.7
1	120975275	120975300	25	120975287	13	13	2.5
1	120984825	120984900	75	120984862	14	40	4.5
1	120995100	120995300	200	120995187	28	181	19.6
1	121127550	121127600	50	121127587	20	39	7.4
1	121132750	121133325	575	121132987	39	731	103.2
1	121175350	121175550	200	121175462	20	138	20.2
1	121176000	121176350	350	121176162	60	559	49
1	121226225	121226700	475	121226362	38	523	76.7
1	121281250	121281600	350	121281437	78	664	25
1	121325175	121325425	250	121325287	64	511	51.8
1	121393525	121393575	50	121393562	14	27	4.2
1	121462450	121462725	275	121462512	52	422	58
1	121696475	121696725	250	121696612	23	189	21.5
1	121740675	121740850	175	121740712	16	103	14.7
1	121870075	121870275	200	121870187	19	123	17
1	122182050	122182150	100	122182062	14	53	6.3
1	122471425	122471925	500	122471537	38	420	36.6
1	122586950	122587225	275	122587087	25	210	23.2
1	122914700	122915025	325	122914812	65	613	61.4
1	122915425	122915625	200	122915487	15	109	13.4
1	122924775	122924900	125	122924787	13	62	8.7
1	123670325	123670625	300	123670462	41	350	16.8
1	124155975	124156000	25	124155987	13	13	2.1
1	124282750	124283025	275	124282912	28	232	18.6
1	124434850	124435250	400	124435012	65	662	25.1
1	124892800	124893050	250	124892962	20	175	12.8
1	125629075	125629125	50	125629112	15	29	4.6
1	126002350	126002650	300	126002512	38	329	12.4
1	127515625	127515825	200	127515687	20	135	17.5
1	127572500	127572575	75	127572537	15	41	5.7
1	127956675	127957050	375	127956862	85	726	30.6
1	128205325	128205450	125	128205387	15	69	8
1	128581300	128581375	75	128581312	13	39	4.6
1	129601500	129601575	75	129601512	17	49	8.9
1	129611400	129611425	25	129611412	14	14	2.4
1	129611750	129611850	100	129611762	14	51	7.7
1	129732350	129732625	275	129732487	41	329	41.1
1	129828450	129828800	350	129828637	30	313	13.3
1	129922300	129922575	275	129922437	48	372	12.4
1	130171925	130172125	200	130171962	17	124	17.2
1	130219875	130220300	425	130220062	90	924	61.4
1	130227850	130228175	325	130227987	64	585	26.5
1	130234475	130234675	200	130234562	24	155	19.6
1	130287150	130287225	75	130287162	13	38	2.8
1	130424550	130424750	200	130424612	22	157	27
1	130687725	130687925	200	130687762	29	192	28.5
1	130934850	130934925	75	130934862	15	43	7.8
1	132378050	132378075	25	132378062	15	15	2.9
1	132966675	132966750	75	132966737	18	48	8.7
1	132967100	132967125	25	132967112	21	21	3.5
1	132973850	132973925	75	132973887	16	45	8.4
1	133306325	133306575	250	133306512	23	190	26.1
1	133325900	133326000	100	133325987	15	56	9.1
1	133341850	133341875	25	133341862	13	13	2.5
1	133546725	133547075	350	133546887	29	307	34.2
1	133575050	133575100	50	133575062	17	33	5.6
1	133717675	133718150	475	133717962	127	1302	64.2
1	133718950	133719325	375	133719087	24	279	41.1
1	134025125	134025550	425	134025387	44	520	54.6
1	134028350	134028925	575	134028587	102	1132	95.9
1	134065400	134065525	125	134065437	35	150	28.8
1	134091150	134091400	250	134091287	46	351	27.7
1	134115825	134116100	275	134115962	43	365	43
1	134169850	134169875	25	134169862	13	13	1.8
1	134203025	134203050	25	134203037	13	13	2.5
1	134298575	134299000	425	134298762	81	906	65.6
1	134563825	134564000	175	134563862	17	107	7.4
1	134678375	134678675	300	134678537	83	727	69.4
1	134706525	134706825	300	134706687	37	338	34.5
1	134775450	134775625	175	134775537	18	107	16.2
1	134808875	134809125	250	134808962	44	358	32.1
1	134840325	134840450	125	134840387	17	74	11.2
1	134846850	134847125	275	134847012	44	394	43.9
1	134907775	134908125	350	134907937	43	406	33.4
1	135036750	135036875	125	135036787	26	119	22.1
1	135168025	135168050	25	135168037	13	13	1.3
1	135224750	135224775	25	135224762	13	13	2.4
1	135225100	135225600	500	135225337	171	1883	101.4
1	135239175	135239350	175	135239212	34	200	27
1	135261925	135262125	200	135262062	24	172	23.9
1	135275950	135276025	75	135275987	22	61	11
1	135319975	135320525	550	135320187	127	1668	79.2
1	135320875	135321250	375	135321062	117	1082	70.4
1	135358375	135358525	150	135358462	17	92	16.9
1	135495175	135495600	425	135495387	95	996	88.3
1	135510775	135511200	425	135511012	88	966	78.3
1	135879675	135879875	200	135879837	18	125	15.9
1	136005575	136005850	275	136005712	42	334	44.1
1	136026700	136027075	375	136026887	41	395	35.6
1	136201100	136201150	50	136201112	14	27	2.2
1	136202175	136202300	125	136202262	18	76	10.6
1	136231275	136231300	25	136231287	13	13	2.5
1	136308900	136308925	25	136308912	17	17	3.4
1	136317425	136317525	100	136317437	16	56	8.4
1	136351425	136351800	375	136351637	142	1295	48
1	136373400	136373525	125	136373512	20	89	13.5
1	136386950	136387400	450	136387212	82	888	80.3
1	136425625	136425875	250	136425737	30	230	26.4
1	137002475	137002650	175	137002537	25	150	26.5
1	137015475	137015800	325	137015637	60	539	48.7
1	137034000	137034350	350	137034187	71	682	60.9
1	137324175	137324525	350	137324362	81	741	62.6
1	137370075	137370350	275	137370187	29	231	30.7
1	137432500	137432550	50	137432512	13	26	4.5
1	137448675	137449025	350	137448837	74	660	52.4
1	137471800	137472000	200	137471887	21	145	15.1
1	137491925	137492325	400	137492262	29	373	64
1	137493375	137493700	325	137493537	73	668	60.6
1	137540675	137540850	175	137540737	25	131	20.4
1	137608675	137608725	50	137608687	14	27	4.6
1	138232175	138232200	25	138232187	14	14	2.2
1	138243975	138244300	325	138244137	40	375	45.8
1	138382850	138382925	75	138382912	23	60	9.8
1	138386675	138387000	325	138386862	53	499	56.1
1	138388400	138388425	25	138388412	13	13	2
1	138429575	138430025	450	138429712	45	540	58.2
1	138490800	138490825	25	138490812	18	18	3.5
1	138491100	138491525	425	138491337	94	964	76.8
1	138496625	138496900	275	138496737	39	341	37.4
1	138544300	138544625	325	138544437	62	616	67.9
1	138554500	138554700	200	138554562	18	124	18.7
1	138598225	138598350	125	138598287	17	76	13.3
1	138761825	138761925	100	138761887	18	65	10.6
1	138769225	138769250	25	138769237	16	16	3.1
1	138769625	138769650	25	138769637	13	13	2.4
1	138770025	138770425	400	138770262	38	440	62.3
1	138868075	138868450	375	138868187	32	349	25.1
1	138990400	138990675	275	138990562	63	512	65.9
1	139022175	139022250	75	139022187	13	38	4
1	139139675	139139850	175	139139762	16	102	16.6
1	139194975	139195325	350	139195137	91	805	40.9
1	139204075	139204275	200	139204237	18	125	19
1	139206825	139206950	125	139206912	16	75	6.1
1	139970500	139970800	300	139970637	26	249	26.3
1	140420425	140420675	250	140420512	24	197	19.8
1	141228825	141229150	325	141229012	24	247	5.2
1	141242275	141242500	225	141242362	22	155	16.8
1	141311025	141311375	350	141311212	105	959	73.3
1	141316300	141316650	350	141316487	30	309	21.8
1	142000025	142000100	75	142000037	13	38	4.2
1	142005075	142005175	100	142005162	14	49	5.2
1	142062000	142062050	50	142062037	26	50	9.9
1	142245675	142246150	475	142245862	125	1214	64.5
1	142251350	142251525	175	142251412	19	117	19.6
1	142329825	142330200	375	142330062	45	459	29.2
1	145033875	145034100	225	145033962	22	160	14.8
1	145081675	145081825	150	145081762	16	86	11.5
1	145127950	145128050	100	145127987	18	64	4.6
1	145493975	145494325	350	145494137	53	469	40.4
1	148085075	148085400	325	148085237	40	334	24.6
1	148189325	148189425	100	148189387	16	57	4.7
1	148978050	148978175	125	148978162	14	65	8.1
1	150243675	150243825	150	150243737	16	90	4.6
1	150615950	150616100	150	150616012	18	92	6.3
1	150837025	150837200	175	150837112	20	119	12.4
1	150859725	150859950	225	150859812	22	163	9.8
1	151877900	151877975	75	151877912	13	39	6.1
1	152259125	152259450	325	152259287	56	535	68.6
1	152939650	152939900	250	152939812	46	369	42.9
1	152982450	152982550	100	152982487	16	60	7.8
1	152997725	152997950	225	152997837	26	188	21.2
1	153056050	153056175	125	153056087	19	84	12.8
1	153189325	153189500	175	153189437	19	123	19.7
1	153278025	153278350	325	153278162	40	354	37.7
1	153306900	153307075	175	153307037	18	111	19.3
1	153476100	153476200	100	153476112	13	49	5.3
1	153640650	153641000	350	153640837	58	560	43.2
1	153643075	153643300	225	153643212	37	277	31.3
1	153832150	153832175	25	153832162	13	13	2.2
1	153832700	153832975	275	153832862	45	368	40.6
1	154176950	154177125	175	154177012	19	118	14.9
1	154335350	154335750	400	154335562	49	521	40.2
1	154556050	154556225	175	154556112	34	209	32.8
1	154607775	154607850	75	154607812	14	41	5.9
1	154662675	154662950	275	154662812	19	178	14.8
1	154666925	154666975	50	154666962	21	41	7.5
1	154677975	154678225	250	154678112	33	264	38.8
1	154705250	154705525	275	154705362	46	372	38.5
1	154736025	154736275	250	154736162	25	219	31.1
1	154771725	154771775	50	154771737	19	34	5.9
1	154799925	154800200	275	154800087	62	500	44.5
1	154802350	154802625	275	154802487	59	537	62.3
1	154855450	154855600	150	154855562	36	188	30.9
1	154857550	154857900	350	154857712	63	652	71.4
1	154889425	154889475	50	154889437	14	28	5.2
1	154960100	154960150	50	154960137	14	27	4.2
1	154961850	154961950	100	154961862	22	86	16.3
1	154978700	154978950	250	154978837	47	358	32.4
1	155110000	155110325	325	155110162	77	679	44.8
1	155138825	155139125	300	155138962	36	359	61.9
1	155147450	155147575	125	155147537	20	92	16.8
1	155256375	155256575	200	155256437	22	161	25.1
1	155323075	155323300	225	155323212	39	274	22.1
1	155352450	155352700	250	155352562	36	302	40.8
1	155439900	155440025	125	155439962	21	92	12.7
1	155503050	155503300	250	155503187	34	277	39.1
1	155665400	155665500	100	155665412	14	56	7.8
1	155842900	155843550	650	155843037	38	645	73.2
1	156507675	156507700	25	156507687	13	13	2
1	156762075	156762200	125	156762087	14	70	9.8
1	156797475	156797750	275	156797562	25	228	14.4
1	156817350	156817600	250	156817437	38	288	37
1	156848725	156848750	25	156848737	13	13	2.1
1	156872350	156872500	150	156872487	19	96	18
1	156873925	156874050	125	156873937	15	65	10.6
1	157838900	157838925	25	157838912	15	15	2.8
1	158105325	158105500	175	158105487	16	100	3.6
1	158402050	158402325	275	158402237	21	183	25
1	158451125	158451275	150	158451162	19	99	13.3
1	158506400	158506700	300	158506562	38	359	43.4
1	158798125	158798325	200	158798262	30	208	24.2
1	158802075	158802175	100	158802162	14	52	5.3
1	158816475	158816700	225	158816562	28	207	15.2
1	158820175	158820550	375	158820337	55	562	45.8
1	158831500	158831700	200	158831587	30	214	22.3
1	158834700	158834875	175	158834787	23	137	21.5
1	158884925	158884950	25	158884937	13	13	1.8
1	159090300	159090450	150	159090337	16	89	16.3
1	159295700	159295925	225	159295787	33	236	31.3
1	160192925	160193075	150	160193012	21	111	17.7
1	160198675	160198875	200	160198812	22	137	17.7
1	160223525	160223775	250	160223687	37	267	32.8
1	160854975	160855125	150	160855087	18	93	3.4
1	161266600	161266825	225	161266762	25	188	12.4
1	161487250	161487375	125	161487312	18	80	9.6
1	162046375	162046825	450	162046637	56	608	66.3
1	162054700	162055050	350	162054837	27	292	27.8
1	162145900	162146000	100	162145937	40	145	25.1
1	162147025	162147150	125	162147087	15	70	8.5
1	162488375	162488550	175	162488437	17	110	17.5
1	162571525	162571775	250	162571612	37	270	36
1	162876325	162876525	200	162876412	22	137	22.6
1	162907325	162907550	225	162907437	51	385	52.2
1	163084350	163084650	300	163084487	46	384	43
1	163091050	163091200	150	163091112	21	111	18.4
1	163110750	163111100	350	163110912	49	443	26.1
1	163216350	163216525	175	163216412	18	112	13
1	163279675	163279950	275	163279787	32	273	31.1
1	163606125	163606250	125	163606137	14	66	9.8
1	163755550	163755750	200	163755612	17	125	25
1	164191550	164191575	25	164191562	13	13	1.7
1	165000475	165000675	200	165000512	30	210	26.5
1	165838625	165838650	25	165838637	13	13	2.4
1	165854950	165855200	250	165855062	40	297	31
1	165856525	165856800	275	165856662	50	404	42.6
1	166212375	166212475	100	166212437	25	96	17.7
1	166213725	166214200	475	166213962	75	874	57.7
1	166340200	166340450	250	166340337	34	270	44.8
1	166359025	166359100	75	166359037	13	39	6.3
1	167450700	167451050	350	167450812	26	274	32.1
1	167478275	167478350	75	167478287	18	54	9.5
1	167515625	167515725	100	167515662	22	81	12.4
1	167803325	167803525	200	167803362	20	134	23.6
1	167839800	167840000	200	167839887	20	146	13.4
1	167961725	167962175	450	167961962	67	893	101.5
1	167971850	167971975	125	167971887	20	92	13
1	167979075	167979400	325	167979237	47	429	45.8
1	168137350	168137475	125	168137387	18	84	11.9
1	168930325	168930550	225	168930412	23	176	13
1	169107150	169107375	225	169107262	34	244	27.8
1	169116100	169116275	175	169116137	22	140	14
1	169119100	169119125	25	169119112	20	20	3.9
1	169126250	169126500	250	169126437	38	284	50
1	169285275	169285500	225	169285362	29	212	26.3
1	169334600	169334950	350	169334787	76	676	34.8
1	169435925	169436000	75	169435937	15	44	8.4
1	169691550	169691625	75	169691562	14	42	6.8
1	169752600	169752850	250	169752737	33	262	29.6
1	169806550	169806600	50	169806562	13	26	4.2
1	170050775	170050950	175	170050912	27	164	27.1
1	170219625	170219800	175	170219662	30	177	24.6
1	171671200	171671500	300	171671337	29	253	29.5
1	171806000	171806050	50	171806037	21	40	7.5
1	171938325	171938525	200	171938362	23	146	20.5
1	172012050	172012075	25	172012062	16	16	3.1
1	172217250	172217400	150	172217337	19	90	10.1
1	172314375	172314675	300	172314537	64	495	34.5
1	172358275	172358525	250	172358387	27	219	25.3
1	172488225	172488450	225	172488287	30	214	19.6
1	172533200	172533450	250	172533337	23	171	19
1	172726150	172726300	150	172726187	26	120	20.1
1	172883275	172883525	250	172883387	34	278	28.5
1	172926700	172926925	225	172926812	33	262	24.2
1	173058275	173058450	175	173058387	41	243	41.9
1	173156400	173156700	300	173156537	48	441	78.8
1	173167100	173167225	125	173167162	21	98	14.2
1	173209725	173209750	25	173209737	13	13	2.2
1	173308175	173308400	225	173308237	36	251	37.1
1	173338325	173338425	100	173338387	28	100	16.3
1	173339400	173339925	525	173339737	31	481	35.6
1	173797500	173797625	125	173797537	18	82	11.7
1	173860900	173861100	200	173860987	31	221	30
1	173863925	173864175	250	173864112	22	177	18.6
1	173944475	173944600	125	173944537	16	75	11.9
1	174040075	174040100	25	174040087	13	13	2.5
1	174098500	174098700	200	174098537	21	156	12.4
1	174151550	174151575	25	174151562	13	13	1.5
1	174159975	174160250	275	174160087	31	258	29.2
1	174186625	174186825	200	174186687	21	150	11.6
1	174254925	174255175	250	174255037	39	307	36
1	174292075	174292300	225	174292212	28	211	15.8
1	174318425	174318500	75	174318462	17	44	8
1	174318775	174318900	125	174318787	14	65	10.1
1	174362175	174362300	125	174362212	21	98	18.2
1	175158550	175158700	150	175158662	16	85	9.9
1	175185250	175185500	250	175185412	51	423	56.4
1	175226575	175226750	175	175226662	34	215	34.5
1	175255575	175255725	150	175255612	23	129	21.6
1	176323075	176323100	25	176323087	15	15	2.1
1	176565625	176565800	175	176565662	17	105	6.6
1	176800875	176800925	50	176800887	13	26	2.9
1	176860900	176861025	125	176860937	18	82	12.1
1	176876400	176876525	125	176876462	16	72	11
1	177850550	177850750	200	177850687	17	115	18.7
1	178470850	178471100	250	178470987	23	182	12.7
1	178480875	178481325	450	178481162	46	526	39.8
1	178650775	178651025	250	178650912	38	285	33.8
1	178717025	178717075	50	178717037	14	27	4.5
1	178785550	178785700	150	178785662	18	95	10.8
1	178829300	178829550	250	178829437	20	163	27
1	179392525	179392675	150	179392637	16	85	10.1
1	179453150	179453175	25	179453162	13	13	2
1	179590150	179590450	300	179590287	44	396	38.4
1	180120700	180120825	125	180120737	15	72	5.6
1	180144325	180144525	200	180144387	23	159	18.2
1	180173100	180173175	75	180173137	16	42	5.9
1	180174750	180175075	325	180174937	79	747	77.6
1	180197450	180197650	200	180197612	19	121	14
1	180243450	180243700	250	180243662	27	237	29.7
1	180333025	180333150	125	180333062	18	81	11.9
1	180381350	180381475	125	180381387	22	105	19.1
1	180408775	180408825	50	180408787	17	31	5.3
1	180571300	180571575	275	180571437	48	397	25.4
1	180687250	180687575	325	180687412	91	741	39.5
1	180924275	180924500	225	180924387	26	207	33.4
1	181013950	181014000	50	181013962	13	26	3.2
1	181103600	181103800	200	181103762	26	194	16.3
1	181109025	181109200	175	181109087	18	105	17.7
1	181113575	181113900	325	181113712	39	370	27.4
1	181441125	181441400	275	181441262	39	300	33.2
1	181464575	181464600	25	181464587	13	13	2.2
1	181559825	181559975	150	181559862	19	102	15.4
1	182047400	182047600	200	182047487	23	161	28.1
1	182385675	182385725	50	182385687	17	34	6.4
1	182407875	182408125	250	182407987	46	359	45.9
1	182630750	182630825	75	182630812	16	43	7
1	182725325	182725700	375	182725512	135	1281	82.5
1	182761350	182761800	450	182761537	248	2394	104.2
1	182770375	182770725	350	182770537	118	996	54.3
1	183577075	183577200	125	183577112	14	64	12
1	183579125	183579325	200	183579237	27	181	26.7
1	183596050	183596075	25	183596062	13	13	2.4
1	183790325	183790550	225	183790412	61	441	44.5
1	183840150	183840175	25	183840162	15	15	2.1
1	183854950	183855050	100	183854987	16	59	10.3
1	183866800	183867350	550	183866987	108	1289	106.1
1	183867900	183868075	175	183867987	24	133	22.2
1	183939400	183939500	100	183939437	21	79	14.1
1	183999650	184000050	400	183999837	86	890	83
1	184018500	184018800	300	184018662	31	284	14.7
1	184019250	184019350	100	184019262	14	53	5.9
1	184027850	184028200	350	184028037	47	465	30.2
1	184133925	184134075	150	184133937	15	73	13.1
1	185418375	185418625	250	185418512	30	227	12.3
1	185719250	185719400	150	185719312	18	97	16.5
1	185720575	185720775	200	185720687	18	117	19.6
1	185725325	185725400	75	185725337	15	41	8
1	185735350	185735450	100	185735387	17	63	10.5
1	186197800	186198100	300	186197962	37	313	32.7
1	186487400	186487450	50	186487412	14	28	5.4
1	186780900	186781125	225	186780962	29	206	20.5
1	186799775	186800025	250	186799912	35	269	28.6
1	186805750	186806050	300	186805912	59	487	56.7
1	186850075	186850350	275	186850187	32	261	11.2
1	186909450	186909550	100	186909512	15	55	8.7
1	187189050	187189325	275	187189187	33	273	23.6
1	187218475	187218575	100	187218487	13	52	8
1	187427700	187427725	25	187427712	14	14	1
1	187656875	187656900	25	187656887	13	13	0.6
1	187937125	187937650	525	187937637	18	280	55.7
1	187962275	187962500	225	187962387	22	170	24
1	188211300	188211675	375	188211487	73	675	44.5
1	188214550	188214950	400	188214762	63	691	48
1	188623600	188623925	325	188623737	74	650	46.8
1	188630075	188630300	225	188630137	21	157	19
1	188655475	188655750	275	188655612	17	171	24.3
1	188732700	188732725	25	188732712	13	13	2.5
1	188983375	188983400	25	188983387	13	13	2.5
1	189142550	189142800	250	189142687	37	272	27.5
1	189421000	189421025	25	189421012	13	13	1.3
1	189425425	189425675	250	189425562	32	246	26.4
1	189488225	189488300	75	189488262	14	40	4.6
1	189683975	189684100	125	189684037	18	79	6
1	190340550	190340800	250	190340712	21	182	20.5
1	190555000	190555350	350	190555162	57	552	29.9
1	190699550	190699750	200	190699662	21	139	14
1	190707300	190707550	250	190707362	35	268	29.3
1	190714200	190714450	250	190714337	53	424	61.9
1	191462350	191462500	150	191462487	21	107	20.5
1	191617175	191617575	400	191617337	89	895	64
1	191832300	191832400	100	191832337	14	54	8.7
1	191870400	191870500	100	191870437	14	54	9.5
1	191999700	191999750	50	191999712	15	28	4.9
1	192332875	192332975	100	192332887	14	53	8.7
1	192679850	192679950	100	192679912	18	66	9.4
1	192770925	192771200	275	192771062	27	217	23.2
1	193225425	193225650	225	193225487	25	191	12.7
1	193316950	193317200	250	193317062	30	252	30.7
1	193362450	193362700	250	193362562	37	275	34.2
1	193399125	193399325	200	193399212	29	189	26.3
1	193519725	193519925	200	193519837	20	135	19.1
1	193631225	193631400	175	193631362	19	114	11.7
1	194150625	194150650	25	194150637	13	13	2.1
1	194155650	194156000	350	194155837	72	663	44.3
1	194216150	194216375	225	194216287	26	188	24.2
1	194223575	194223775	200	194223712	24	150	19.4
1	194446250	194446650	400	194446512	33	418	56.6
1	194465400	194465450	50	194465412	13	26	4.7
1	194535400	194535700	300	194535537	44	382	17.6
1	194571075	194571300	225	194571137	20	157	22.8
1	195205425	195205675	250	195205562	27	237	37.3
1	195210750	195210950	200	195210787	27	164	32.8
1	195239300	195239325	25	195239312	14	14	2.8
1	195239625	195239650	25	195239637	15	15	2.9
1	195432800	195433225	425	195432987	66	708	43
1	195634825	195634925	100	195634837	16	61	5.4
1	195734875	195735100	225	195734962	22	155	16.8
1	196137725	196137800	75	196137737	14	41	3.5
1	196206625	196206950	325	196206787	49	441	36.4
1	196316875	196317175	300	196317012	59	489	33.8
1	196447400	196447650	250	196447537	25	199	19.7
1	196701825	196702175	350	196701987	35	347	38.4
3	3652400	3652725	325	3652562	51	433	12.1
3	3653475	3653700	225	3653562	37	282	17.5
3	4132675	4132900	225	4132812	38	273	9.6
3	4727225	4727325	100	4727237	14	53	1.1
3	5290925	5291125	200	5291062	20	133	11
3	5310050	5310175	125	5310087	16	75	7.4
3	5410625	5410825	200	5410737	21	138	16.1
3	5972200	5972450	250	5972387	18	162	9.1
3	6156775	6157225	450	6157062	46	558	45.2
3	6484475	6484575	100	6484537	15	56	3.9
3	6746575	6746875	300	6746737	40	342	20
3	6905700	6905925	225	6905862	21	163	9.4
3	7149525	7149800	275	7149712	25	207	14
3	7349800	7350125	325	7349962	39	341	40.6
3	7493250	7493350	100	7493312	21	77	12.7
3	7561900	7562100	200	7562012	21	151	24.4
3	7562650	7563025	375	7562812	44	467	33.1
3	7988725	7989000	275	7988837	27	230	7
3	7989875	7989900	25	7989887	13	13	1.1
3	8452625	8452900	275	8452737	20	180	16.5
3	8493350	8493550	200	8493387	16	117	12.8
3	8668300	8668575	275	8668412	32	263	23.3
3	8749175	8749275	100	8749262	14	51	6.1
3	8849300	8849475	175	8849362	20	133	23.5
3	8947250	8947500	250	8947412	28	216	17.7
3	8947750	8947950	200	8947887	21	152	20.4
3	8971550	8971850	300	8971712	43	376	26.3
3	8986900	8986950	50	8986912	22	44	8.4
3	8991475	8992025	550	8991862	63	722	90.5
3	9081600	9081775	175	9081687	19	123	17.9
3	9227075	9227325	250	9227187	23	189	17.6
3	9309800	9310000	200	9309887	25	170	20.2
3	9470875	9471000	125	9470912	17	80	8.4
3	9503075	9503350	275	9503187	26	236	39.2
3	9507550	9507800	250	9507662	31	247	30.6
3	9528100	9528150	50	9528112	13	26	4.3
3	9574950	9575100	150	9575087	16	90	17.3
3	9593850	9593900	50	9593887	16	30	5.7
3	9594400	9594525	125	9594487	18	79	15.6
3	9597850	9597900	50	9597862	13	26	3.1
3	9624850	9625250	400	9625162	28	307	49.7
3	9629400	9629525	125	9629412	20	85	14.7
3	9637600	9637875	275	9637687	34	291	25.4
3	10336625	10336925	300	10336762	20	205	33.7
3	10358175	10358325	150	10358287	15	85	7.7
3	10647850	10647975	125	10647937	14	66	7.8
3	10899725	10899875	150	10899787	18	93	5.3
3	11065925	11066050	125	11065987	16	71	7
3	11193975	11194250	275	11194062	44	336	10.3
3	11194975	11195325	350	11195162	36	328	25.7
3	11196650	11196850	200	11196712	24	174	16.3
3	11546350	11546675	325	11546487	41	362	17.7
3	11598975	11599175	200	11599112	18	133	4
3	12198675	12198875	200	12198712	21	147	13.8
3	12310975	12311275	300	12311137	25	231	30.7
3	13389800	13389825	25	13389812	13	13	1.7
3	14423475	14423675	200	14423612	26	173	13.5
3	14455450	14455650	200	14455537	24	158	4.7
3	14598050	14598275	225	14598087	18	140	19.7
3	14625425	14625800	375	14625612	27	307	34.6
3	14840075	14840275	200	14840262	20	136	21.4
3	14936450	14936725	275	14936562	29	244	28.2
3	14976525	14976950	425	14976712	47	580	45.5
3	14977400	14977650	250	14977512	30	251	29.2
3	14980875	14980975	100	14980887	17	63	9.8
3	15033750	15033775	25	15033762	13	13	0.6
3	15089125	15089200	75	15089137	16	45	5.7
3	15207125	15207225	100	15207137	14	52	8.9
3	16623700	16623900	200	16623737	16	113	17.2
3	17051125	17051375	250	17051237	26	219	25.8
3	17080375	17080525	150	17080462	17	91	6.6
3	17081850	17082025	175	17081962	17	107	6.7
3	17133525	17133800	275	17133612	32	277	19.8
3	17430775	17430800	25	17430787	13	13	2.5
3	17681850	17682250	400	17682062	82	762	33
3	17977900	17977950	50	17977937	16	30	5.4
3	17979275	17979650	375	17979462	85	778	31.7
3	18042150	18042475	325	18042287	19	214	11.9
3	18049100	18049375	275	18049237	23	179	14.1
3	18448850	18449150	300	18449012	32	275	11.9
3	18531275	18531700	425	18531487	40	462	37.1
3	18716750	18716900	150	18716762	14	83	4.9
3	18816075	18816500	425	18816237	94	977	65.2
3	18887625	18887900	275	18887787	31	256	26.1
3	18889100	18889225	125	18889187	17	73	2
3	19381100	19381325	225	19381187	25	193	26.4
3	19502450	19502775	325	19502612	46	416	33
3	19821150	19821175	25	19821162	15	15	2.9
3	19899150	19899450	300	19899287	34	317	45
3	19900050	19900075	25	19900062	13	13	0.8
3	19935275	19935425	150	19935287	16	88	7.5
3	20089375	20089525	150	20089437	18	96	6.3
3	20215850	20216375	525	20216187	38	585	55.4
3	20387475	20387575	100	20387512	15	58	3.6
3	21863575	21863825	250	21863712	31	236	24.9
3	21919075	21919475	400	21919262	45	482	40.1
3	22057775	22057950	175	22057862	19	107	12.1
3	22083025	22083050	25	22083037	13	13	2.5
3	22083275	22083550	275	22083412	78	644	35.3
3	22127100	22127275	175	22127137	23	132	22.2
3	22128925	22128950	25	22128937	14	14	2.4
3	22154725	22155100	375	22154912	52	551	60.1
3	22175325	22175375	50	22175337	15	28	4.7
3	22215375	22215450	75	22215387	14	42	7.3
3	22216250	22216375	125	22216287	15	68	11.7
3	22225450	22225650	200	22225537	23	167	22.5
3	22228975	22229350	375	22229162	25	299	35.6
3	22266000	22266200	200	22266112	29	205	31.7
3	22312975	22313200	225	22313087	32	234	15.2
3	22334300	22334350	50	22334337	15	29	5.6
3	22347500	22347925	425	22347687	45	478	32.7
3	22489025	22489250	225	22489112	29	201	8.2
3	23181350	23181375	25	23181362	13	13	1
3	23541650	23541925	275	23541787	30	248	10.6
3	23542575	23542775	200	23542687	24	156	3.2
3	23596050	23596225	175	23596162	18	114	6.6
3	23618125	23618150	25	23618137	13	13	1.1
3	23648850	23649175	325	23648987	38	337	17.6
3	24270825	24271000	175	24270837	14	91	12.7
3	25198050	25198100	50	25198062	14	27	1.3
3	25319250	25319400	150	25319262	17	93	14
3	25643425	25643725	300	25643587	37	316	15.6
3	27111900	27112475	575	27112212	70	1014	81.4
3	27219325	27219475	150	27219412	14	78	11.6
3	27254375	27254625	250	27254562	27	206	22.1
3	27254950	27255100	150	27255062	32	165	25.8
3	27346075	27346225	150	27346187	26	142	27.1
3	27382000	27382200	200	27382062	24	163	21.2
3	27474175	27474450	275	27474287	41	336	40.6
3	27787800	27788075	275	27787912	41	337	24.4
3	27894350	27894525	175	27894412	18	104	17
3	27894825	27894850	25	27894837	17	17	3.1
3	27935975	27936150	175	27936037	17	105	18.6
3	28063725	28063825	100	28063787	14	53	5.3
3	28126700	28127000	300	28126887	60	498	47.8
3	28128000	28128175	175	28128087	16	103	15.4
3	28211475	28211650	175	28211562	21	126	12.8
3	28212775	28212925	150	28212837	18	93	9.1
3	28229200	28229500	300	28229337	38	342	40.1
3	28408125	28408350	225	28408237	35	249	26
3	28452925	28453050	125	28452937	14	66	8.5
3	28826000	28826125	125	28826087	19	80	6.3
3	28843675	28843975	300	28843812	36	309	18.6
3	29033400	29033725	325	29033537	74	649	50
3	29034825	29034850	25	29034837	13	13	2.2
3	29326625	29326850	225	29326737	23	166	17
3	29732650	29732925	275	29732812	25	215	23
3	29959750	29959950	200	29959862	22	155	15.2
3	30264725	30264950	225	30264837	22	169	11.5
3	30656950	30657175	225	30656987	21	167	26
3	30837525	30837950	425	30837687	42	493	65.1
3	30886800	30886850	50	30886812	13	26	3.1
3	30914900	30915650	750	30915462	82	1126	118.1
3	30952850	30952875	25	30952862	13	13	2.5
3	31079900	31080325	425	31080087	101	990	46.4
3	31192200	31192475	275	31192287	40	340	37.4
3	31197675	31198025	350	31197862	76	661	33
3	31208525	31208625	100	31208562	18	69	11.3
3	31280275	31280650	375	31280462	120	1086	47.9
3	31281200	31281250	50	31281212	20	40	7.7
3	31337075	31337100	25	31337087	13	13	2.4
3	31590125	31590400	275	31590287	27	223	21.2
3	31596900	31597000	100	31596912	14	54	5.9
3	32170625	32170800	175	32170712	18	118	16.9
3	32821850	32822100	250	32821937	24	198	21.4
3	32897450	32897600	150	32897487	14	80	4.5
3	32950100	32950475	375	32950287	133	1188	38.7
3	32950800	32951025	225	32950912	48	334	37.8
3	32954525	32954850	325	32954662	70	678	66.8
3	33025550	33025625	75	33025562	17	50	9.4
3	33699950	33700125	175	33699987	18	101	12.1
3	34064875	34065325	450	34065237	43	558	62
3	34107975	34108075	100	34108037	15	58	9.6
3	34180950	34181175	225	34181087	27	207	29.3
3	34182100	34182450	350	34182237	28	306	48
3	34197975	34198200	225	34198087	39	273	31.8
3	34199175	34199475	300	34199337	61	527	37.6
3	34227300	34227625	325	34227437	37	372	52.5
3	34635700	34635975	275	34635812	22	191	18.2
3	34636950	34637125	175	34636987	18	101	18.7
3	34673750	34673975	225	34673887	29	203	22.2
3	34750800	34750850	50	34750812	13	26	1.8
3	34837725	34838150	425	34837962	75	785	61.4
3	34841450	34841700	250	34841562	22	166	30.7
3	34845275	34845825	550	34845587	199	1959	56.1
3	34859500	34859550	50	34859512	13	26	3.6
3	34860000	34860325	325	34860162	76	661	58.8
3	34936800	34937125	325	34936937	44	415	53.3
3	34947950	34948550	600	34948362	38	712	87.7
3	34949475	34949750	275	34949587	79	625	57.8
3	34951950	34952100	150	34952037	25	136	25.8
3	34952725	34953225	500	34952962	64	817	83.2
3	35104400	35104450	50	35104412	13	26	2.9
3	35325250	35325275	25	35325262	13	13	1.8
3	35532000	35532125	125	35532037	15	71	11.2
3	35629275	35629475	200	35629387	26	173	16.3
3	35915175	35915575	400	35915337	44	473	48.6
3	36414950	36415200	250	36415037	25	219	39.4
3	36697325	36697600	275	36697462	34	270	23.2
3	36713750	36713950	200	36713837	25	160	21.9
3	36792575	36792600	25	36792587	13	13	2.4
3	37322000	37322225	225	37322112	22	163	13
3	37494275	37494375	100	37494312	15	57	5.7
3	37710300	37710425	125	37710387	16	71	7
3	37848700	37849000	300	37848837	35	309	39.7
3	37878350	37878375	25	37878362	14	14	2
3	37949700	37949900	200	37949787	28	181	22.1
3	38150300	38150325	25	38150312	14	14	2.7
3	38166925	38167200	275	38167037	30	230	26.1
3	38203975	38204100	125	38204037	17	75	7.5
3	38759800	38759825	25	38759812	13	13	2.2
3	38760200	38760250	50	38760212	13	26	4.3
3	39274250	39274350	100	39274312	16	58	8.2
3	39411525	39411775	250	39411637	25	195	24.3
3	39526700	39526775	75	39526737	15	43	6.6
3	40170650	40170675	25	40170662	15	15	2.9
3	40633100	40633200	100	40633112	16	59	11
3	40647600	40647975	375	40647787	55	512	46.2
3	41114150	41114250	100	41114212	15	55	6.3
3	41196175	41196550	375	41196362	105	986	57.8
3	41236975	41237225	250	41237087	35	257	28.1
3	41592525	41592800	275	41592612	34	294	37.4
3	42690750	42690825	75	42690787	14	40	3.8
3	43916150	43916175	25	43916162	13	13	0.7
3	44394750	44395050	300	44394887	21	186	16.1
3	44700725	44700975	250	44700812	23	177	9.8
3	45341725	45341850	125	45341737	15	72	6.1
3	45342925	45343150	225	45343037	25	196	14.9
3	46131750	46131900	150	46131812	19	94	4.9
3	46967150	46967350	200	46967312	23	172	8.1
3	48164075	48164325	250	48164187	28	213	13.4
3	48164875	48165175	300	48165012	30	287	25.1
3	48220600	48220750	150	48220637	15	88	7.1
3	49768925	49769000	75	49768962	15	43	6.4
3	49865625	49865650	25	49865637	13	13	1.8
3	50970325	50970600	275	50970462	33	276	30.4
3	51204000	51204075	75	51204012	14	39	4.3
3	51216475	51216625	150	51216587	25	140	23.3
3	51311550	51311800	250	51311612	35	282	41.8
3	51322450	51322625	175	51322587	24	129	20.7
3	51446250	51446275	25	51446262	14	14	2.7
3	51678275	51678600	325	51678462	42	397	48.3
3	52060550	52060700	150	52060562	17	94	16.9
3	52110525	52110675	150	52110587	16	85	12.1
3	52342075	52342375	300	52342237	85	756	74.3
3	52471625	52471700	75	52471687	15	44	8.5
3	52474400	52474525	125	52474437	20	94	17.5
3	52501425	52501500	75	52501487	23	64	11.5
3	52650800	52651000	200	52650862	27	189	29.7
3	53044225	53044325	100	53044312	15	57	8
3	53052350	53052375	25	53052362	13	13	2.5
3	53510675	53510800	125	53510687	15	71	9.2
3	53545650	53546025	375	53545837	49	501	45.1
3	53649750	53649950	200	53649862	23	157	20.2
3	53664350	53664400	50	53664387	16	31	5
3	53681800	53682150	350	53681962	65	617	44.1
3	53686475	53686675	200	53686487	14	105	14.8
3	53738050	53738650	600	53738312	108	1357	102.6
3	53957275	53957600	325	53957412	51	458	21.9
3	54974450	54974700	250	54974537	39	306	17.9
3	55077875	55078325	450	55078112	107	1109	54
3	55851500	55851825	325	55851637	35	314	33.2
3	56390875	56390900	25	56390887	13	13	2.2
3	57376100	57376225	125	57376137	16	79	14.9
3	57646850	57647025	175	57646862	23	149	20.7
3	57739650	57739725	75	57739712	17	48	9.4
3	57820625	57820650	25	57820637	14	14	1.5
3	58465800	58465975	175	58465887	20	125	18.2
3	58592625	58592825	200	58592737	21	148	12.8
3	58624575	58624800	225	58624662	28	203	24.2
3	58649675	58649750	75	58649687	15	44	4.2
3	58658925	58658950	25	58658937	14	14	2.8
3	59049200	59049500	300	59049337	25	219	17.9
3	59416975	59417050	75	59416987	18	49	8
3	59566200	59566325	125	59566262	16	73	12.1
3	59627950	59628150	200	59627987	18	137	5.7
3	59965500	59965850	350	59965662	19	235	9.1
3	59968125	59968325	200	59968287	22	145	2.2
3	60194500	60194625	125	60194537	15	74	2.7
3	60885825	60886000	175	60885937	20	115	16.1
3	60943700	60944050	350	60943862	39	367	30.2
3	61334425	61334725	300	61334537	52	449	27.4
3	61567150	61567375	225	61567287	25	193	18.3
3	61904725	61905150	425	61904887	38	403	35.2
3	62429800	62430025	225	62429937	19	145	19.7
3	62671675	62671700	25	62671687	13	13	1.8
3	63026475	63027000	525	63026737	97	1250	29.2
3	63332050	63332175	125	63332062	13	61	6.7
3	63878975	63879150	175	63879087	18	109	5.3
3	63911125	63911375	250	63911237	23	183	15.2
3	63923125	63923175	50	63923137	15	29	5.2
3	63930400	63930725	325	63930462	16	197	21.9
3	63988175	63988275	100	63988187	17	68	10.6
3	64353675	64354025	350	64353862	76	698	28.5
3	64409675	64410200	525	64409987	58	787	36.9
3	64961325	64961425	100	64961362	15	58	1.3
3	65565150	65565300	150	65565262	18	96	13.5
3	65623375	65623450	75	65623412	15	42	5.7
3	65736800	65737075	275	65736962	41	344	44.1
3	65738350	65738725	375	65738562	35	402	47.9
3	65745100	65745650	550	65745412	138	1614	65.1
3	65746550	65746825	275	65746712	22	195	28.3
3	65912875	65913175	300	65913037	22	210	27
3	65949425	65949450	25	65949437	14	14	2.7
3	66063225	66063625	400	66063487	25	291	44.3
3	66775050	66775400	350	66775237	73	641	23
3	67239750	67239775	25	67239762	13	13	1.7
3	67517875	67517950	75	67517887	15	42	8
3	67579500	67579600	100	67579512	13	52	4.7
3	67591975	67592125	150	67592087	21	115	19
3	67670600	67670625	25	67670612	13	13	2.5
3	68318925	68319075	150	68319062	15	85	7.7
3	68394750	68394875	125	68394762	18	80	8.9
3	68576275	68576475	200	68576362	20	128	15.9
3	68580475	68580525	50	68580512	21	41	7.7
3	68652850	68653325	475	68653037	44	578	66.2
3	68908150	68908300	150	68908237	17	94	10.9
3	69151925	69152025	100	69152012	14	53	9.1
3	69747850	69748025	175	69747962	20	119	13.3
3	70551300	70551525	225	70551387	25	178	20.8
3	71655975	71656150	175	71656087	17	102	6.3
3	72946425	72947075	650	72946787	107	1360	47.9
3	72956325	72956550	225	72956412	22	159	6.7
3	73094025	73094275	250	73094162	41	313	17
3	73114125	73114200	75	73114162	15	41	5.6
3	73520225	73520675	450	73520387	56	631	24.9
3	73614125	73614200	75	73614162	14	40	3.5
3	73658600	73658800	200	73658687	22	150	15.6
3	75736725	75736975	250	75736837	44	350	5.3
3	75737600	75737950	350	75737787	39	329	12.4
3	75741675	75741700	25	75741687	13	13	1.3
3	79124925	79125000	75	79124937	14	42	8.2
3	79125625	79125975	350	79125787	34	356	38.1
3	79230100	79230300	200	79230187	18	128	16.5
3	79304350	79304775	425	79304612	75	777	52.2
3	79502925	79503225	300	79503087	65	562	52.9
3	79520925	79521200	275	79521087	46	376	37.7
3	79559675	79559700	25	79559687	13	13	1.5
3	79839675	79839850	175	79839812	18	109	12.8
3	81049825	81049850	25	81049837	13	13	1.8
3	81120750	81121000	250	81120837	19	174	28.8
3	81188225	81188500	275	81188337	39	340	39.4
3	81379050	81379125	75	81379062	15	45	6.6
3	82082000	82082175	175	82082112	19	108	6.1
3	82504350	82504650	300	82504387	15	142	12
3	82527625	82527775	150	82527662	14	80	2.8
3	82974950	82975075	125	82974962	14	67	5.3
3	83001675	83001850	175	83001737	19	119	15.9
3	83668700	83669450	750	83669262	37	653	80.4
3	83672050	83672250	200	83672162	30	200	30.2
3	83675100	83675325	225	83675212	34	255	34.2
3	83852100	83852300	200	83852187	25	161	22.5
3	83873125	83873300	175	83873237	20	115	14
3	84029750	84030025	275	84029887	22	204	27.9
3	84066125	84066725	600	84066287	70	1151	101.2
3	84080375	84080600	225	84080437	30	227	30.4
3	84106750	84107025	275	84106837	36	308	41.9
3	84267675	84268025	350	84267837	93	870	59.1
3	84277525	84277700	175	84277612	33	208	33.2
3	84279775	84280075	300	84279987	60	530	46.8
3	84292650	84292750	100	84292662	20	65	11.5
3	84459925	84460125	200	84460012	26	157	23.2
3	84577725	84577925	200	84577837	31	202	32
3	84663375	84663625	250	84663537	25	197	25.1
3	84726025	84726050	25	84726037	15	15	2.8
3	84741150	84741325	175	84741237	23	144	22.2
3	84751350	84751625	275	84751437	32	252	39.2
3	84906825	84907025	200	84906937	18	122	15.4
3	84929625	84929725	100	84929662	15	55	8.2
3	85111000	85111275	275	85111137	28	207	30
3	85226375	85226575	200	85226512	20	120	15.8
3	85424150	85424425	275	85424287	45	349	35.9
3	85579700	85579850	150	85579762	16	87	9.4
3	85659875	85660075	200	85659937	28	176	25.1
3	85918750	85919075	325	85918937	39	365	38.4
3	86763525	86763800	275	86763637	31	270	31.3
3	86778725	86779000	275	86778887	41	325	45.1
3	86918775	86919100	325	86918912	32	327	31.6
3	86930950	86931400	450	86931137	89	962	82.5
3	86933425	86933600	175	86933487	19	121	15.6
3	87036675	87036875	200	87036787	30	194	22.9
3	87222575	87222775	200	87222712	19	136	22.1
3	87279750	87280000	250	87279887	36	296	35.1
3	87280675	87280950	275	87280787	36	307	34.9
3	87326875	87327050	175	87326987	20	116	14
3	87553825	87553875	50	87553837	15	28	0.6
3	87717725	87717750	25	87717737	16	16	2.9
3	87744300	87744625	325	87744487	28	266	29.5
3	87824550	87824650	100	87824562	14	55	6.6
3	87971525	87971625	100	87971612	48	173	32
3	87979500	87979625	125	87979562	24	104	16.8
3	87992025	87992225	200	87992087	18	124	21.4
3	88060225	88060575	350	88060387	145	1298	68.6
3	88255750	88255900	150	88255787	17	89	13
3	88362150	88362175	25	88362162	16	16	3.1
3	88362825	88363075	250	88362912	60	442	54.5
3	88366125	88366175	50	88366137	22	44	7.3
3	88367475	88367675	200	88367662	17	119	8.9
3	88617425	88617900	475	88617712	32	436	50.7
3	88625525	88625550	25	88625537	21	21	4
3	88657675	88658250	575	88658037	165	1923	104.7
3	88661425	88661725	300	88661562	128	1082	52.9
3	88664325	88664350	25	88664337	13	13	2.5
3	88732350	88732675	325	88732537	35	369	34.8
3	89173550	89173600	50	89173562	17	34	6.7
3	89311850	89312175	325	89312012	106	918	78.6
3	89313250	89313475	225	89313387	31	221	30
3	89368050	89368100	50	89368062	18	36	6.4
3	89733475	89733525	50	89733487	25	47	9.1
3	89908250	89908375	125	89908287	20	94	16.3
3	89912300	89912700	400	89912437	55	590	46.2
3	90168100	90168150	50	90168112	16	31	5.9
3	90329475	90329575	100	90329512	32	123	19.6
3	90532350	90532550	200	90532462	38	275	35.6
3	91116375	91116400	25	91116387	15	15	0.6
3	92049950	92050075	125	92049962	18	87	0.1
3	92050650	92050725	75	92050687	18	46	3.6
3	92780000	92780325	325	92780162	59	503	15.2
3	93002575	93002725	150	93002662	18	96	14.8
3	93248450	93248725	275	93248637	27	242	28.2
3	93463550	93463775	225	93463637	26	182	21.9
3	93492575	93492600	25	93492587	17	17	3.4
3	93497275	93497650	375	93497437	32	341	58.7
3	93517200	93517400	200	93517312	22	153	22.2
3	93641425	93641450	25	93641437	13	13	2.4
3	94392425	94392650	225	94392537	21	158	12.4
3	94563300	94563600	300	94563462	39	344	43.3
3	94687300	94687425	125	94687387	16	73	11.9
3	94879875	94879975	100	94879912	22	81	13.5
3	95245925	95245950	25	95245937	13	13	2.4
3	95262075	95262200	125	95262087	18	77	14.8
3	95455525	95455675	150	95455562	18	101	13.4
3	95519350	95519625	275	95519537	21	189	33.4
3	95674225	95674300	75	95674237	31	91	17.3
3	95738350	95738700	350	95738437	41	414	74.7
3	95748900	95749425	525	95749012	58	752	122.8
3	95759650	95759675	25	95759662	13	13	2.4
3	95787475	95787750	275	95787612	39	354	47.6
3	96169750	96170025	275	96169912	22	194	31.7
3	96189225	96189475	250	96189362	34	263	28.5
3	96414100	96414125	25	96414112	22	22	3.5
3	96416100	96416150	50	96416137	17	32	5.9
3	96517750	96517850	100	96517787	16	63	9.8
3	96587775	96588025	250	96587887	28	235	37.6
3	96657600	96657750	150	96657612	15	84	11.3
3	96675700	96675850	150	96675762	19	95	12.1
3	96678125	96678300	175	96678237	21	123	23.3
3	96761100	96761575	475	96761162	49	683	91.2
3	96765925	96766125	200	96765962	34	231	40.1
3	96819450	96819675	225	96819537	32	231	22.3
3	96918350	96918625	275	96918462	33	271	35.9
3	97214925	97215075	150	97214962	19	107	13.5
3	97244825	97245200	375	97245012	148	1308	58.1
3	97247275	97247425	150	97247337	23	123	23.7
3	97264475	97264500	25	97264487	14	14	2.8
3	97444025	97444075	50	97444062	14	27	2.2
3	97625600	97625925	325	97625762	60	505	39.8
3	97631675	97631950	275	97631837	45	386	55.9
3	97762350	97762400	50	97762362	14	27	2.9
3	97813475	97813500	25	97813487	13	13	2.4
3	97896725	97897000	275	97896862	49	409	45
3	98109900	98109925	25	98109912	13	13	2.5
3	99364425	99364550	125	99364437	20	86	14.7
3	99387300	99387400	100	99387362	15	56	8.7
3	100163725	100163875	150	100163812	19	98	11.5
3	100324775	100324850	75	100324812	15	43	1.8
3	100549825	100550000	175	100549887	30	191	25.8
3	101200750	101200850	100	101200787	17	63	8.1
3	101292450	101292825	375	101292612	75	791	58
3	101293225	101293400	175	101293262	24	137	23.3
3	101409350	101409775	425	101409512	41	505	64.7
3	101437400	101437425	25	101437412	13	13	2.5
3	101456550	101456575	25	101456562	13	13	2.4
3	101474125	101474200	75	101474137	13	39	5.3
3	101493725	101493775	50	101493737	13	26	4.3
3	101542625	101542725	100	101542637	14	55	8.2
3	101635300	101635575	275	101635437	29	237	25.8
3	101652425	101652475	50	101652437	13	26	4.6
3	101699400	101699850	450	101699462	25	302	37.4
3	101729575	101729925	350	101729787	58	537	37.6
3	101762100	101762350	250	101762187	25	210	25.8
3	101844175	101844300	125	101844262	16	69	9.6
3	102026150	102026325	175	102026237	28	164	26.3
3	102178575	102178700	125	102178587	16	78	11.7
3	102184900	102185425	525	102185087	30	407	62.6
3	102189925	102189975	50	102189962	15	28	5.2
3	102196350	102196625	275	102196487	23	194	26.7
3	102212875	102213250	375	102213062	118	1097	62.6
3	102232975	102233175	200	102233062	23	168	23.6
3	102238875	102238975	100	102238912	15	55	7.7
3	102293975	102294100	125	102294062	14	66	7.5
3	102319025	102319050	25	102319037	13	13	2.4
3	102319725	102320150	425	102319937	92	938	52.1
3	102734325	102734675	350	102734512	74	654	45.7
3	102802950	102803150	200	102803062	28	186	17.7
3	102846975	102847375	400	102847162	69	685	48
3	102933075	102933150	75	102933087	13	38	4.5
3	102977800	102978000	200	102977937	19	125	19.6
3	103215075	103215375	300	103215212	58	482	54.6
3	103237000	103237125	125	103237087	27	126	22.6
3	103256200	103256600	400	103256387	95	968	75
3	103274350	103274675	325	103274487	39	396	47.8
3	103275325	103275675	350	103275487	68	649	64
3	103300725	103300775	50	103300737	18	34	5.7
3	103336800	103337325	525	103337087	212	2523	122.5
3	103508375	103508725	350	103508562	48	460	52.4
3	103669975	103670250	275	103670087	44	381	44
3	103812700	103812775	75	103812737	18	52	7.8
3	103900750	103900975	225	103900912	26	195	26.5
3	103979650	103979700	50	103979687	16	30	4.6
3	104043350	104043650	300	104043462	29	277	48.7
3	104356600	104356775	175	104356687	25	153	28.6
3	104481525	104481550	25	104481537	13	13	0.7
3	104563275	104563300	25	104563287	13	13	2.5
3	104940500	104940525	25	104940512	15	15	2.9
3	104942925	104943075	150	104943012	16	89	14.4
3	104943475	104943775	300	104943612	46	385	42
3	105181050	105181175	125	105181162	22	89	16.1
3	105546575	105546600	25	105546587	13	13	1
3	106675850	106675900	50	106675862	13	26	4.7
3	107189575	107189925	350	107189712	54	501	32.1
3	107476425	107476475	50	107476437	14	28	4
3	107478900	107479125	225	107479012	23	171	22.6
3	107868950	107869000	50	107868987	17	33	6.1
3	108059800	108059900	100	108059887	18	63	11.2
3	108093750	108093800	50	108093762	14	27	3.9
3	108124000	108124325	325	108124162	20	191	19.4
3	108338150	108338300	150	108338212	18	98	16.6
3	108355100	108355175	75	108355112	19	54	9.1
3	108561525	108561950	425	108561712	168	1587	50.8
3	108716500	108716825	325	108716637	30	291	40.8
3	108781000	108781300	300	108781137	45	389	55.2
3	108850250	108850400	150	108850337	16	90	16.2
3	108865950	108865975	25	108865962	13	13	2.1
3	108984950	108985200	250	108985062	29	242	31.7
3	109012700	109012725	25	109012712	13	13	1.3
3	109696625	109696700	75	109696637	14	41	7.7
3	110264325	110264425	100	110264362	14	54	5.4
3	111221000	111221050	50	111221012	13	26	2.1
3	111499300	111499650	350	111499487	60	556	30.2
3	112216725	112216900	175	112216762	15	100	7.4
3	112367675	112367975	300	112367862	33	300	10.9
3	115169950	115170025	75	115169962	13	38	2.5
3	115682175	115682300	125	115682237	16	74	11.7
3	115829775	115829900	125	115829862	14	65	7.8
3	115836725	115836825	100	115836762	14	55	6
3	116648225	116648600	375	116648412	62	549	28.5
3	116716825	116716850	25	116716837	13	13	2
3	116852325	116852550	225	116852437	17	133	22.6
3	116953450	116953675	225	116953537	37	268	32.5
3	117302950	117303025	75	117302962	13	39	5.4
3	118186825	118187050	225	118186912	24	182	19.8
3	118618450	118618650	200	118618512	20	137	13.8
3	119087225	119087600	375	119087387	67	639	52.8
3	119089200	119089350	150	119089262	19	96	2.7
3	119120100	119120325	225	119120162	23	167	15.9
3	119213200	119213225	25	119213212	13	13	0.8
3	119598250	119598450	200	119598337	22	147	15.6
3	119770450	119770725	275	119770612	28	238	33.4
3	119936150	119936350	200	119936237	20	142	21.8
3	119939050	119939300	250	119939137	25	204	28.5
3	120871475	120871825	350	120871637	39	360	28.8
3	121013250	121013400	150	121013262	13	78	8
3	121299775	121299800	25	121299787	17	17	3.4
3	121379525	121379800	275	121379662	47	380	31.1
3	121408950	121409000	50	121408987	14	27	4
3	121410300	121410350	50	121410337	20	39	7
3	121422425	121422500	75	121422487	16	46	8.2
3	121460350	121460375	25	121460362	14	14	2.7
3	121522700	121522725	25	121522712	14	14	2.8
3	121534850	121535050	200	121534987	30	185	17.9
3	121569450	121569500	50	121569462	21	42	7.5
3	121610275	121610325	50	121610287	16	31	5.7
3	121786200	121786625	425	121786387	89	877	54.6
3	121801675	121801700	25	121801687	13	13	2.1
3	121802250	121802275	25	121802262	17	17	3.2
3	121987250	121987575	325	121987362	36	381	57.4
3	122010150	122010275	125	122010187	15	71	12.4
3	122137325	122137825	500	122137587	315	3138	68.3
3	122193675	122193750	75	122193712	15	42	5.6
3	122235525	122235625	100	122235562	14	55	10.5
3	122283975	122284125	150	122284037	24	125	21.5
3	122286000	122286125	125	122286112	22	91	15.1
3	122304300	122304325	25	122304312	18	18	3.5
3	122398650	122398700	50	122398662	13	26	4.6
3	122426025	122426500	475	122426187	46	581	71.5
3	122557475	122557500	25	122557487	15	15	2.9
3	123063275	123063500	225	123063387	21	164	14.4
3	123248125	123248350	225	123248262	34	223	27
3	123288325	123288500	175	123288437	17	98	15.6
3	124598100	124598525	425	124598287	96	960	40.6
3	124601975	124602150	175	124602087	18	107	13.3
3	126079175	126079300	125	126079187	21	97	15.2
3	126440525	126440825	300	126440637	29	265	26.1
3	126441600	126441900	300	126441737	41	330	42.6
3	126456300	126456500	200	126456412	16	115	16.3
3	126990425	126990525	100	126990512	28	102	17.5
3	127249725	127249875	150	127249787	24	129	19.1
3	127292925	127293050	125	127292937	16	76	10.1
3	127445500	127445675	175	127445512	13	83	11.5
3	127455775	127456050	275	127455912	51	452	56.7
3	127456325	127456550	225	127456437	34	240	19.7
3	127481125	127481300	175	127481137	15	95	9.8
3	127522250	127522525	275	127522387	41	323	36.7
3	127536400	127537075	675	127536812	47	629	50.6
3	127687275	127687350	75	127687287	15	42	7
3	128329150	128329225	75	128329212	19	55	10.9
3	129231100	129231175	75	129231112	18	49	6.4
3	129333200	129333325	125	129333262	15	71	10.3
3	129521525	129521600	75	129521562	26	74	14.7
3	129536575	129536625	50	129536612	20	39	7.1
3	129543850	129544150	300	129544012	29	289	37.3
3	129565650	129565950	300	129565812	32	308	34.4
3	129567300	129567375	75	129567362	15	43	7.7
3	130056725	130056750	25	130056737	18	18	3.5
3	130483300	130483575	275	130483412	25	206	13.7
3	130680075	130680100	25	130680087	13	13	2.5
3	130986225	130986250	25	130986237	14	14	2.8
3	131073800	131074100	300	131073987	41	376	54.5
3	131091400	131091800	400	131091587	101	1026	61.9
3	131107175	131107250	75	131107187	13	39	5.6
3	131133425	131133675	250	131133562	32	248	33.8
3	131328475	131328550	75	131328537	18	49	8.8
3	131458700	131458750	50	131458712	19	37	7.1
3	131564900	131565075	175	131564987	20	123	15.4
3	133456075	133456300	225	133456162	44	318	36.4
3	133461925	133462300	375	133462087	56	630	51.1
3	133469825	133470250	425	133470062	65	676	33.4
3	133471400	133471650	250	133471537	31	245	41.6
3	133746400	133746625	225	133746512	25	185	13.1
3	134074425	134074675	250	134074537	26	204	15.8
3	134176550	134176750	200	134176662	21	135	14.5
3	135253350	135253625	275	135253462	30	253	22.1
3	135270075	135270350	275	135270187	35	296	27.5
3	135271350	135271500	150	135271387	19	97	10.8
3	135376000	135376075	75	135376062	14	40	2.8
3	135403850	135404075	225	135403987	24	172	14
3	135483650	135484325	675	135483987	83	1320	108.2
3	135484725	135485075	350	135484887	64	616	45.9
3	135519100	135519375	275	135519337	25	221	39.5
3	135531625	135531750	125	135531712	17	78	11
3	135668900	135668950	50	135668912	22	41	7.8
3	136052975	136053500	525	136053312	79	996	46.5
3	136187550	136187625	75	136187612	14	40	5.6
3	137484825	137485200	375	137485037	98	909	55
3	137580000	137580200	200	137580112	24	164	23.2
3	137674825	137675100	275	137674987	30	243	27
3	137717475	137717750	275	137717612	79	645	70.1
3	137721850	137722150	300	137721962	27	250	40.2
3	137770550	137770900	350	137770737	84	768	67.2
3	137774150	137774175	25	137774162	14	14	1
3	137825675	137825900	225	137825862	24	183	15.4
3	137979175	137979475	300	137979337	54	462	39.9
3	138605950	138606025	75	138606012	18	50	9.1
3	138613375	138613500	125	138613437	15	67	10.5
3	138629750	138630100	350	138629912	61	543	30.3
3	138643350	138643425	75	138643387	22	65	12.4
3	138670575	138670700	125	138670612	16	73	8.5
3	138713800	138713975	175	138713862	26	156	23.5
3	138750025	138750100	75	138750087	14	39	7.1
3	138750675	138750750	75	138750712	16	47	8.9
3	138756725	138756850	125	138756737	15	72	7.8
3	138763825	138764025	200	138763887	25	174	27.4
3	138928175	138928450	275	138928337	32	255	21.8
3	138943325	138943350	25	138943337	13	13	1.8
3	138961075	138961125	50	138961087	14	28	5.6
3	139106825	139107050	225	139106912	23	168	8.4
3	140052625	140052750	125	140052637	14	62	10.3
3	140654250	140654625	375	140654487	22	263	29.2
3	141786525	141786900	375	141786712	82	786	50
3	141868900	141869150	250	141869012	48	350	46.4
3	142255650	142255775	125	142255687	14	67	9.8
3	142286225	142286475	250	142286337	36	283	34.4
3	142333150	142333275	125	142333237	21	91	13.4
3	142587700	142587850	150	142587812	19	92	11.6
3	142824425	142824600	175	142824487	21	118	15.5
3	144109350	144109425	75	144109362	15	43	6.8
3	144348550	144348825	275	144348737	31	269	35.2
3	144350325	144350775	450	144350537	80	841	44.5
3	144359200	144359525	325	144359362	45	393	34.9
3	144379800	144379900	100	144379862	15	57	6.8
3	144915100	144915325	225	144915212	33	228	27.5
3	144955300	144955550	250	144955412	33	265	23.3
3	145588850	145589125	275	145588962	58	485	57
3	145810775	145810975	200	145810862	19	132	9.4
3	145923875	145924025	150	145923912	21	112	17.5
3	146312850	146312900	50	146312862	13	26	3.4
3	146317250	146317750	500	146317487	98	1162	51.7
3	146363900	146364050	150	146363987	14	80	10.5
3	146406625	146406925	300	146406787	44	362	22.9
3	147119025	147119350	325	147119162	48	433	33.8
3	147235525	147235850	325	147235662	62	567	51.7
3	147328650	147328800	150	147328687	18	99	9.9
3	147580900	147581200	300	147581037	43	360	34.4
3	147864750	147865000	250	147864837	35	280	27.7
3	147901025	147901350	325	147901187	62	546	36.2
3	147901800	147901900	100	147901837	14	55	5.9
3	148280775	148281225	450	148280987	29	413	54.5
3	148616650	148616850	200	148616662	15	116	17
3	148923700	148923950	250	148923812	37	300	39.4
3	149022650	149022825	175	149022762	24	143	19.1
3	149157025	149157650	625	149157412	140	1535	92.7
3	149179950	149179975	25	149179962	13	13	2.1
3	149189425	149189775	350	149189662	24	262	34.6
3	149251675	149251925	250	149251737	25	216	31.1
3	149343250	149343525	275	149343412	39	307	17.7
3	149421775	149421950	175	149421862	18	106	9.4
3	149536900	149536925	25	149536912	13	13	0.4
3	151159825	151159850	25	151159837	13	13	1.4
3	152147525	152147850	325	152147662	27	278	27
3	152169250	152169375	125	152169312	20	96	15.5
3	152393675	152393725	50	152393687	13	26	2.1
3	152603650	152603675	25	152603662	13	13	2.4
3	153286600	153286800	200	153286737	18	125	17.3
3	153297450	153297800	350	153297637	35	350	33
3	153613200	153613550	350	153613387	103	911	38.1
3	154316850	154317175	325	154317012	63	538	39.2
3	154483050	154483450	400	154483312	66	637	57.1
3	154712425	154712600	175	154712487	20	124	17.6
3	155028475	155028525	50	155028487	13	26	4.7
3	155872925	155873100	175	155873012	16	102	12.4
3	156135025	156135275	250	156135137	20	168	13.5
3	156349825	156349900	75	156349837	13	39	2.7
3	157183675	157183825	150	157183712	17	92	8.8
3	157226250	157226450	200	157226362	18	131	7.1
3	157256350	157256750	400	157256537	149	1397	65.6
3	157257050	157257500	450	157257262	148	1499	54.6
3	157340650	157340800	150	157340687	16	88	4.6
3	157366175	157366200	25	157366187	13	13	1.5
3	157518000	157518025	25	157518012	14	14	1.4
3	157867550	157867600	50	157867562	17	34	6.6
3	157868525	157868700	175	157868587	21	119	9.9
3	157967400	157967575	175	157967487	21	132	19.3
3	158946525	158946850	325	158946687	26	261	33.9
3	159550250	159550575	325	159550437	55	493	25.4
3	159783000	159783150	150	159783087	16	80	13.7
2	3337500	3337700	200	3337562	28	188	25.7
2	3705400	3705450	50	3705412	14	27	2.2
2	4330200	4330350	150	4330237	17	91	10.2
2	4456450	4456700	250	4456562	33	258	22.3
2	4460875	4460925	50	4460887	13	26	4.2
2	4492475	4492775	300	4492637	72	615	44.8
2	4871750	4871850	100	4871812	19	68	6
2	4993250	4993425	175	4993362	22	133	15.6
2	4995325	4995700	375	4995512	55	543	41.8
2	5137175	5137625	450	5137412	72	859	27.9
2	5274325	5274650	325	5274462	23	241	18.3
2	5343625	5343750	125	5343637	15	70	13.4
2	5394750	5395000	250	5394862	26	206	21.2
2	5401550	5401675	125	5401612	18	84	15.2
2	5502100	5502225	125	5502112	17	80	13
2	5653325	5653350	25	5653337	13	13	2.4
2	5676875	5676975	100	5676887	13	51	5.7
2	5706950	5706975	25	5706962	14	14	2.5
2	5727600	5727825	225	5727712	24	182	15.6
2	5964325	5964350	25	5964337	14	14	2
2	5977800	5977950	150	5977862	16	88	11.5
2	6178450	6178650	200	6178512	19	140	14
2	6376700	6376800	100	6376712	15	59	7.4
2	6511950	6512200	250	6512087	31	233	11.5
2	8416200	8416800	600	8416512	98	1248	81.1
2	9564800	9565075	275	9564962	18	173	20.5
2	10060725	10060875	150	10060762	14	80	13.1
2	10252050	10252550	500	10252337	46	629	46.9
2	10253200	10253350	150	10253212	22	109	16.1
2	10271825	10272075	250	10271912	26	210	23.2
2	10308650	10308950	300	10308812	39	343	33.4
2	10439675	10439825	150	10439762	17	90	9.1
2	10520225	10520425	200	10520312	22	152	12.7
2	10956400	10956475	75	10956412	13	39	7
2	11089725	11089825	100	11089812	14	53	9.6
2	11309575	11309725	150	11309637	18	103	13.4
2	11453375	11453400	25	11453387	14	14	2.7
2	11484150	11484175	25	11484162	13	13	2.5
2	11488900	11489125	225	11489012	33	252	25.8
2	11582025	11582075	50	11582062	17	33	5.7
2	12475725	12475750	25	12475737	14	14	2.8
2	13288375	13288675	300	13288562	41	363	44
2	13490250	13490425	175	13490312	19	117	17
2	13615350	13615625	275	13615487	23	202	21.6
2	13685675	13686000	325	13685862	35	341	27.2
2	13719650	13719825	175	13719762	18	111	8.4
2	13874150	13874525	375	13874262	43	418	37.7
2	15074350	15074425	75	15074387	17	44	1.7
2	15843225	15843475	250	15843362	24	185	27.2
2	15843850	15844050	200	15843987	20	138	14.5
2	15950700	15950900	200	15950762	17	123	10.1
2	16688000	16688025	25	16688012	15	15	2.8
2	17521325	17521600	275	17521462	31	260	31.7
2	17770475	17770675	200	17770637	30	198	34.1
2	17851000	17851400	400	17851187	112	1120	71.9
2	17860875	17861125	250	17860962	29	222	19.6
2	17888525	17888750	225	17888637	26	197	26.8
2	17900450	17900725	275	17900562	21	194	20.8
2	17906725	17907250	525	17907012	206	2288	89.9
2	17957975	17958025	50	17957987	15	29	5.7
2	17964300	17964425	125	17964312	17	77	12.7
2	17973150	17973175	25	17973162	17	17	3.2
2	18235925	18236100	175	18236037	18	107	13.8
2	18261325	18261475	150	18261437	18	95	17.5
2	18504750	18504850	100	18504762	15	54	10.2
2	18591700	18591950	250	18591762	18	147	21.5
2	18935875	18936100	225	18935987	34	253	11.2
2	19078625	19078800	175	19078737	28	165	26.5
2	19262525	19262700	175	19262612	17	110	19.4
2	19298775	19299025	250	19298862	25	205	24.9
2	19310550	19310825	275	19310712	28	237	19.3
2	19379725	19379950	225	19379837	24	179	20.8
2	19575250	19575400	150	19575337	17	91	11.7
2	19590025	19590175	150	19590112	17	89	12.7
2	20094700	20094875	175	20094737	18	104	11
2	20126975	20127350	375	20127187	76	746	42.2
2	20242225	20242350	125	20242262	15	68	6.6
2	20311975	20312150	175	20311987	17	108	20.7
2	20363075	20363350	275	20363262	31	273	44.1
2	20403950	20404175	225	20404037	26	184	24.9
2	20414000	20414400	400	20414237	123	1152	66.8
2	20466725	20467075	350	20467012	33	330	48.5
2	20508425	20508550	125	20508512	15	67	9.9
2	20512075	20512275	200	20512137	37	222	25.6
2	20512825	20513125	300	20512937	41	364	39.2
2	20572450	20573325	875	20572987	76	1734	148.4
2	20583475	20583650	175	20583537	24	159	30.9
2	20586275	20586300	25	20586287	13	13	0.6
2	20586975	20587425	450	20587187	48	598	54.3
2	20607350	20607525	175	20607387	23	132	18.6
2	20608975	20609075	100	20608987	14	54	10.1
2	20610075	20610150	75	20610137	21	61	9.4
2	20640550	20640725	175	20640637	43	260	40.8
2	20641825	20642050	225	20641912	44	303	40.8
2	20654175	20654350	175	20654187	18	118	23.2
2	20655575	20655800	225	20655762	28	207	28.8
2	20852000	20852425	425	20852237	45	485	45.7
2	21310400	21311025	625	21310737	97	1400	88.8
2	21881800	21882000	200	21881937	36	223	32.3
2	21962700	21963125	425	21962962	42	473	25.1
2	22212175	22212450	275	22212312	40	310	27.2
2	22471675	22472025	350	22471862	72	642	38.8
2	22743475	22743575	100	22743512	14	53	4.5
2	22746950	22747025	75	22747012	21	60	12
2	22824775	22824800	25	22824787	13	13	1.7
2	23275300	23275475	175	23275412	19	119	18.3
2	23820950	23821075	125	23820987	17	80	10.9
2	23822075	23822275	200	23822212	17	119	18.4
2	24263950	24264150	200	24264012	20	145	21.4
2	24265400	24265550	150	24265462	19	101	13.8
2	24734250	24734600	350	24734387	90	796	42
2	24809850	24810125	275	24809937	28	259	33
2	25002500	25002875	375	25002687	159	1395	35.3
2	25194225	25194400	175	25194262	23	142	19.7
2	25202375	25202450	75	25202437	16	44	7.3
2	25877400	25877750	350	25877562	109	1013	64
2	25901425	25901800	375	25901612	45	458	38.1
2	26017225	26017325	100	26017287	17	64	10.5
2	26120900	26121150	250	26121012	41	307	40.6
2	26264825	26265200	375	26265037	83	835	42.3
2	26323000	26323025	25	26323012	13	13	2.5
2	26323725	26323800	75	26323737	17	51	9.1
2	26324350	26324625	275	26324462	20	188	15.2
2	26325925	26326300	375	26326137	85	812	61.9
2	26357700	26357875	175	26357812	17	100	17.6
2	26433175	26433300	125	26433212	27	130	24.7
2	26724975	26725100	125	26724987	18	85	14.2
2	27199950	27200175	225	27200062	52	374	42.6
2	27466800	27467050	250	27466912	29	219	26.7
2	27506300	27506575	275	27506487	30	256	30
2	28288250	28288275	25	28288262	14	14	2.7
2	28328350	28328675	325	28328512	50	439	38.5
2	28429350	28429675	325	28429487	37	339	31.6
2	28729850	28730050	200	28729887	26	182	25.1
2	28919925	28920300	375	28920162	38	381	27.1
2	28943025	28943350	325	28943162	91	772	53.2
2	28946875	28947075	200	28946887	14	103	18.7
2	28974050	28974325	275	28974187	30	274	27.5
2	29323025	29323275	250	29323162	25	194	19.6
2	29374200	29374350	150	29374287	18	89	11.6
2	29395700	29395725	25	29395712	19	19	3.5
2	29453600	29453800	200	29453662	25	166	20.2
2	29513650	29513850	200	29513762	39	253	38.5
2	29551500	29551750	250	29551662	33	249	32.3
2	29642425	29642825	400	29642612	93	948	53.9
2	29657550	29657925	375	29657737	142	1368	88.5
2	29883875	29884100	225	29883937	26	198	24.2
2	29941775	29941925	150	29941837	22	120	20.1
2	29957175	29957475	300	29957312	36	323	42.9
2	30157325	30157675	350	30157512	64	558	31.7
2	30294025	30294100	75	30294037	14	39	6.6
2	30326375	30326425	50	30326387	14	28	4.6
2	30582125	30582425	300	30582262	53	484	37.6
2	30600450	30600525	75	30600462	22	66	12
2	30601400	30601550	150	30601437	23	116	21.5
2	30638500	30638700	200	30638562	31	211	28.8
2	30706875	30707125	250	30707012	36	262	32.4
2	30759825	30759850	25	30759837	20	20	3.8
2	30760900	30761050	150	30760937	27	140	20
2	30864875	30865100	225	30864962	26	201	27.8
2	30879900	30880100	200	30880012	25	157	22.1
2	30882275	30882475	200	30882437	24	171	30
2	30890600	30890875	275	30890762	73	629	62.4
2	30910375	30910500	125	30910387	20	97	17.7
2	30913225	30913575	350	30913387	48	481	46.8
2	30950200	30950300	100	30950262	25	94	16.3
2	30985900	30986050	150	30985962	31	162	23.6
2	31068250	31068450	200	31068337	19	121	15.1
2	31324700	31324925	225	31324837	27	202	25.1
2	31367375	31367450	75	31367437	15	41	7.3
2	31386725	31386950	225	31386787	31	221	19.6
2	31393975	31394150	175	31394037	39	249	38
2	31581850	31581900	50	31581862	14	28	4.6
2	31601375	31601575	200	31601412	21	140	24.4
2	31829275	31829300	25	31829287	14	14	2.7
2	31984675	31985000	325	31984837	77	701	70.7
2	31987475	31987500	25	31987487	13	13	2.4
2	31989175	31989300	125	31989262	21	95	14.8
2	31996575	31996925	350	31996687	46	497	59.1
2	32225725	32225850	125	32225737	14	68	9.9
2	32253150	32253175	25	32253162	21	21	4.2
2	32682800	32683100	300	32682962	82	689	45.2
2	32730475	32730775	300	32730637	60	530	56.4
2	32804150	32804225	75	32804162	18	51	9.6
2	33179450	33179500	50	33179462	14	28	5.3
2	33260700	33260900	200	33260862	20	133	22.1
2	33261625	33261725	100	33261637	25	95	16.5
2	33282975	33283225	250	33283062	31	254	30.6
2	33300575	33300850	275	33300762	51	432	20.7
2	33402650	33402950	300	33402812	80	668	30.7
2	33459350	33459775	425	33459637	61	699	51.1
2	33611375	33611500	125	33611387	13	63	8.2
2	33677950	33678050	100	33677962	14	54	8.1
2	33704975	33705175	200	33705037	21	146	12.8
2	33740275	33740325	50	33740312	16	31	5.9
2	34053425	34053575	150	34053537	20	103	18.9
2	34071575	34071850	275	34071687	41	372	43.9
2	34221475	34221850	375	34221662	98	903	40.9
2	34392450	34392625	175	34392512	18	108	17.2
2	34743425	34743625	200	34743587	23	163	21.1
2	34759500	34759700	200	34759587	25	174	15.9
2	35072175	35072475	300	35072337	21	201	25.6
2	35663175	35663300	125	35663237	20	88	16.1
2	35667825	35668150	325	35667962	37	341	30.7
2	35695475	35695550	75	35695512	15	43	5.9
2	35845325	35845625	300	35845512	35	295	24.6
2	36020675	36021000	325	36020812	45	425	40.6
2	36044175	36044475	300	36044337	53	438	32.3
2	36248475	36248750	275	36248587	20	187	14.1
2	37147050	37147225	175	37147162	18	111	10.1
2	37252850	37252900	50	37252862	15	30	5.9
2	37589350	37589600	250	37589487	68	531	45.7
2	38005925	38006125	200	38006012	23	154	20.4
2	38045525	38045675	150	38045612	18	94	12.7
2	38246550	38246625	75	38246612	19	54	6.8
2	38368325	38368400	75	38368337	15	44	5.9
2	38378800	38378925	125	38378912	15	68	13.5
2	38382625	38382700	75	38382637	15	41	6.8
2	38490800	38491150	350	38490987	88	823	59.2
2	38519500	38519650	150	38519537	15	86	11.9
2	38604550	38604650	100	38604562	16	60	9.8
2	38639525	38639775	250	38639662	29	211	20.7
2	38686150	38686225	75	38686162	14	40	6.6
2	38739450	38739625	175	38739487	22	138	15.6
2	38747200	38747375	175	38747312	29	177	23.5
2	38766050	38766075	25	38766062	13	13	2.5
2	39069050	39069125	75	39069087	14	41	4.5
2	39439950	39440075	125	39440037	15	70	5.6
2	40732850	40733325	475	40733087	114	1221	70.4
2	43187800	43188275	475	43188012	89	973	36.2
2	43554525	43554725	200	43554612	18	126	4.5
2	44296950	44297125	175	44297012	18	109	7.5
[truncated: 11,718 more rows]

## Sheet: OCT4 ESC
CHROM	START	END	LENGTH	PEAK POS	PEAK HEIGHT	TOTAL TARGET COUNTS	TOTAL BACKGROUND COUNTS
1	3472900	3473350	450	3473087	71	688	0
1	3671550	3671950	400	3671712	40	391	3.4
1	3904150	3904500	350	3904337	55	483	0.7
1	4924250	4924450	200	4924312	17	121	4.1
1	4960700	4961000	300	4960837	42	355	3.4
1	4962325	4962800	475	4962562	53	591	17
1	5124850	5125125	275	5124962	21	163	2.7
1	6049150	6049525	375	6049337	39	397	10.9
1	6132925	6133225	300	6133112	30	248	5.5
1	6272450	6272700	250	6272462	19	158	6.1
1	6438225	6438525	300	6438412	19	168	16.4
1	6438750	6439375	625	6439187	48	754	8.2
1	6448025	6448450	425	6448237	60	621	10.9
1	6860500	6860875	375	6860687	71	654	22.5
1	7010700	7011025	325	7010837	33	281	4.8
1	7037300	7037725	425	7037512	102	961	21.8
1	7042400	7042675	275	7042562	23	193	16.4
1	7303400	7303725	325	7303562	49	416	8.9
1	7309175	7309500	325	7309262	16	164	13.6
1	7441625	7441950	325	7441787	23	225	8.9
1	7661575	7661925	350	7661762	24	226	2.7
1	7722675	7722950	275	7722837	34	266	4.8
1	8486250	8486525	275	8486387	19	159	0.7
1	9428200	9428525	325	9428337	42	353	0
1	9615150	9615350	200	9615187	16	106	5.5
1	9687200	9687575	375	9687287	36	350	15.7
1	9938275	9938475	200	9938337	15	105	2
1	9940175	9940450	275	9940312	29	227	9.5
1	10016925	10017200	275	10017062	20	166	4.8
1	10838100	10838575	475	10838312	27	349	0
1	10839825	10840050	225	10839962	25	190	2
1	10863600	10863800	200	10863712	26	180	15
1	10865200	10865375	175	10865287	15	88	3.4
1	11067375	11067575	200	11067412	15	104	2
1	11081975	11082150	175	11082012	16	98	4.1
1	11263025	11263325	300	11263237	27	247	3.4
1	11315350	11315750	400	11315587	37	369	29.3
1	11381225	11381575	350	11381412	36	295	0
1	11486875	11487200	325	11486987	30	297	16.4
1	11733675	11734050	375	11733862	27	284	10.2
1	12011075	12011350	275	12011212	27	224	5.5
1	12677100	12677475	375	12677262	29	344	6.8
1	12678675	12678800	125	12678687	22	100	10.2
1	12729625	12730350	725	12729887	129	1511	38.2
1	12767825	12768025	200	12767887	15	94	3.4
1	12776450	12776725	275	12776612	16	135	6.1
1	12795650	12795875	225	12795737	17	130	0
1	12799550	12799925	375	12799812	22	247	12.3
1	12821225	12821650	425	12821412	81	780	22.5
1	12872050	12872250	200	12872137	15	105	13
1	12939525	12939725	200	12939587	15	99	0
1	12976275	12976575	300	12976362	35	309	23.9
1	12976800	12977075	275	12976937	17	146	4.8
1	13059575	13060300	725	13059837	117	1580	25.2
1	13069950	13070550	600	13070262	45	691	17.7
1	13079825	13080125	300	13079962	31	254	20.4
1	13089300	13089325	25	13089312	17	17	2
1	13113275	13113475	200	13113337	22	152	15
1	13117275	13117575	300	13117462	23	207	2.7
1	13585200	13585375	175	13585212	23	111	8.2
1	13645975	13646125	150	13645987	23	108	12.3
1	13923575	13923875	300	13923712	22	192	7.5
1	13986300	13986600	300	13986487	19	184	5.5
1	14210775	14210950	175	14210862	17	98	4.8
1	14277475	14277775	300	14277637	40	321	15.7
1	14297800	14298100	300	14297937	29	260	16.4
1	14406325	14406550	225	14406437	19	137	4.1
1	15116625	15116950	325	15116812	19	171	13.6
1	15776850	15777275	425	15777012	77	749	33.4
1	16115175	16115850	675	16115362	97	1045	38.2
1	18272600	18272875	275	18272712	19	149	0
1	18624575	18624875	300	18624687	19	186	0
1	19092550	19092800	250	19092687	19	147	2.7
1	19229850	19230125	275	19229962	32	257	9.5
1	20745500	20745675	175	20745612	16	96	10.9
1	20746575	20746900	325	20746737	38	322	4.8
1	20852525	20852950	425	20852712	59	619	30
1	20893775	20894075	300	20893937	26	221	4.1
1	20939975	20940375	400	20940162	32	357	8.2
1	20959950	20960325	375	20960137	32	325	2
1	21241650	21241975	325	21241787	40	356	5.5
1	22362400	22362775	375	22362587	42	393	3.4
1	23997300	23997600	300	23997462	36	296	10.2
1	25126400	25126775	375	25126587	48	438	6.1
1	25254650	25254925	275	25254762	29	238	2.7
1	26174325	26174575	250	26174437	28	218	10.2
1	26852500	26852650	150	26852587	15	74	3.4
1	30359650	30359850	200	30359687	16	103	2.7
1	30749575	30749825	250	30749662	27	200	2
1	30792350	30792575	225	30792412	16	119	6.8
1	31178225	31178550	325	31178412	41	358	20.4
1	33050900	33051150	250	33051037	25	192	8.9
1	33439225	33439700	475	33439562	37	360	3.4
1	33500275	33500550	275	33500437	22	185	5.5
1	33947575	33947725	150	33947662	20	102	8.2
1	33951475	33951950	475	33951687	127	1319	49.1
1	34011125	34011300	175	34011162	15	88	6.1
1	34018250	34018700	450	34018487	53	582	32
1	34018925	34019300	375	34019112	43	433	4.1
1	34047675	34048000	325	34047837	65	555	18.4
1	34048225	34048500	275	34048362	30	260	19.8
1	34051575	34051900	325	34051687	21	214	14.3
1	34084825	34084950	125	34084862	18	74	7.5
1	34413075	34413375	300	34413212	25	201	0
1	34491700	34491925	225	34491787	21	152	6.8
1	34828325	34828500	175	34828437	15	87	2.7
1	35177100	35177600	500	35177362	77	847	6.8
1	35642400	35642775	375	35642587	42	405	14.3
1	35767450	35767625	175	35767562	15	86	10.9
1	35786325	35786450	125	35786387	15	65	3.4
1	35888825	35889275	450	35889037	180	1648	7.5
1	35923475	35923600	125	35923587	15	65	5.5
1	35958325	35959250	925	35958437	34	534	37.5
1	35961825	35962100	275	35961962	20	167	12.3
1	35999175	35999450	275	35999337	24	196	9.5
1	36005550	36006075	525	36005762	57	673	41.6
1	36196100	36196325	225	36196212	24	173	7.5
1	36428900	36429225	325	36429062	42	333	19.8
1	36501650	36501900	250	36501787	17	142	15
1	36748575	36748850	275	36748762	29	239	6.1
1	36778675	36778925	250	36778762	21	165	5.5
1	36843450	36843575	125	36843562	16	69	1.4
1	36851825	36852025	200	36851962	16	111	9.5
1	36927050	36927350	300	36927212	37	307	17.7
1	36928275	36928600	325	36928337	15	163	6.8
1	36929025	36929225	200	36929112	18	117	7.5
1	36930225	36930850	625	36930637	146	1840	47
1	36931325	36931950	625	36931512	23	339	22.5
1	36932275	36932725	450	36932462	44	472	11.6
1	36993775	36994050	275	36993912	26	204	7.5
1	37029775	37030100	325	37029912	45	382	10.2
1	37046350	37046600	250	37046462	31	231	14.3
1	37156925	37157300	375	37157112	24	257	5.5
1	38002975	38003275	300	38003112	34	286	13.6
1	38236175	38236300	125	38236287	15	66	6.1
1	38264350	38264650	300	38264512	22	194	0
1	38566425	38566725	300	38566562	30	258	2.7
1	38575375	38575625	250	38575487	15	118	13.6
1	38741500	38741775	275	38741637	17	143	2.7
1	38768450	38768850	400	38768637	34	360	15.7
1	38813975	38814275	300	38814137	29	263	15.7
1	39067200	39067525	325	39067337	37	344	25.2
1	39374825	39375175	350	39375037	28	279	9.5
1	39472775	39473250	475	39473062	41	459	11.6
1	39478550	39478825	275	39478687	29	226	4.8
1	39645175	39645475	300	39645287	41	332	5.5
1	39845225	39845375	150	39845312	15	73	0
1	39847200	39847925	725	39847462	66	839	18.4
1	39868325	39868625	300	39868437	30	251	26.6
1	40250750	40250950	200	40250812	16	112	0
1	40624700	40625000	300	40624812	24	218	4.1
1	41085075	41085450	375	41085262	58	530	28.6
1	41334875	41335150	275	41334987	39	305	10.9
1	42003050	42003450	400	42003237	69	663	9.5
1	42657950	42658225	275	42658087	17	152	1.4
1	42669550	42669800	250	42669662	20	151	15
1	42858175	42858400	225	42858287	23	157	2
1	43038800	43039100	300	43038937	28	227	13.6
1	43084150	43084350	200	43084262	27	173	15
1	43133075	43133300	225	43133162	28	189	16.4
1	43515700	43516000	300	43515812	18	170	5.5
1	43765300	43765500	200	43765362	15	105	2.7
1	44557850	44558500	650	44558037	38	509	13
1	45352225	45352475	250	45352362	24	185	8.2
1	45810575	45810800	225	45810662	17	127	2
1	46808050	46808375	325	46808237	22	204	10.2
1	46838875	46839150	275	46838987	21	162	5.5
1	46951550	46951875	325	46951687	21	205	8.9
1	47047575	47047825	250	47047687	19	134	0
1	51097275	51097475	200	51097337	15	107	1.4
1	51480525	51481100	575	51480712	94	1097	0.7
1	51517575	51517825	250	51517712	25	192	4.1
1	51687100	51687300	200	51687187	15	109	6.1
1	51876150	51876525	375	51876362	58	527	24.5
1	51952875	51953125	250	51952987	31	242	15
1	51953725	51953850	125	51953737	16	71	6.1
1	52472250	52472550	300	52472387	29	253	0
1	52601200	52601500	300	52601362	28	215	11.6
1	52808775	52809125	350	52808962	67	589	10.9
1	52897950	52898450	500	52898237	160	1597	16.4
1	53154700	53155050	350	53154887	38	343	10.9
1	53694475	53694750	275	53694562	32	263	0
1	53768300	53768650	350	53768462	67	593	17.7
1	53997375	53997650	275	53997562	19	149	1.4
1	54388250	54388550	300	54388362	59	458	21.1
1	54429100	54429900	800	54429612	94	1484	11.6
1	54529950	54530425	475	54530262	47	496	7.5
1	54984625	54984775	150	54984687	16	80	5.5
1	55053075	55053400	325	55053237	44	370	0
1	55076350	55076625	275	55076437	17	152	4.8
1	55131400	55131725	325	55131537	48	396	16.4
1	55143175	55143450	275	55143312	27	227	15
1	55150350	55150675	325	55150512	25	223	4.1
1	55520450	55520750	300	55520587	30	256	10.9
1	55910825	55911150	325	55910962	25	233	3.4
1	56642075	56642375	300	56642237	37	296	1.4
1	56789100	56789325	225	56789212	20	142	12.3
1	56883075	56883325	250	56883162	20	168	1.4
1	57278250	57278450	200	57278337	21	142	2
1	57288275	57288500	225	57288362	18	135	8.9
1	57313800	57313900	100	57313837	16	53	2.7
1	57414900	57415300	400	57415112	57	535	39.5
1	57914675	57914925	250	57914762	33	262	10.2
1	57933550	57933800	250	57933637	19	142	4.8
1	58133050	58133500	450	58133212	39	430	7.5
1	58311450	58311700	250	58311612	21	153	11.6
1	58314325	58314625	300	58314462	22	181	4.8
1	58515025	58515375	350	58515187	55	473	2.7
1	58634075	58634250	175	58634087	18	122	9.5
1	59259575	59259925	350	59259712	20	213	16.4
1	59320575	59321400	825	59321162	107	1327	47
1	59321875	59321975	100	59321937	16	57	3.4
1	59367675	59368325	650	59367937	104	1188	20.4
1	59371400	59371775	375	59371562	68	656	13.6
1	59393075	59393450	375	59393162	34	334	20.4
1	59417125	59417900	775	59417287	22	392	17.7
1	59431925	59432300	375	59432137	39	422	18.4
1	59608000	59608225	225	59608087	17	128	2
1	59673250	59673325	75	59673262	17	39	2.7
1	59913925	59914125	200	59914012	15	97	2.7
1	60000950	60001150	200	60001037	15	98	0
1	60783825	60784000	175	60783862	38	207	13
1	60795425	60795925	500	60795612	70	784	34.1
1	62115950	62116350	400	62116137	52	513	28.6
1	62332525	62332875	350	62332687	38	346	4.8
1	62584875	62585150	275	62585012	21	162	0
1	62701775	62702225	450	62702012	47	522	18.4
1	62706825	62707000	175	62706912	16	86	3.4
1	62717725	62718225	500	62717987	73	761	29.3
1	62861775	62862000	225	62861837	16	117	1.4
1	63072300	63073050	750	63072462	46	607	10.2
1	63136000	63136200	200	63136112	19	119	4.1
1	63148150	63148300	150	63148287	19	96	3.4
1	63178275	63178475	200	63178337	26	158	12.3
1	63181550	63182100	550	63181912	48	638	27.3
1	63376525	63376800	275	63376662	20	163	9.5
1	63601925	63602400	475	63602312	16	221	5.5
1	63943375	63943650	275	63943512	18	149	6.1
1	64239875	64240125	250	64239987	22	160	13.6
1	64245800	64246025	225	64245887	21	146	10.2
1	64350225	64350425	200	64350312	18	123	9.5
1	64510975	64511250	275	64511087	26	227	10.2
1	64629500	64629700	200	64629612	15	96	0
1	64665775	64665900	125	64665787	17	76	6.8
1	64666450	64666725	275	64666562	27	229	4.1
1	64666950	64667350	400	64667162	51	533	21.8
1	64667750	64668300	550	64667987	83	867	18.4
1	64819275	64819800	525	64819412	40	447	25.9
1	64916550	64916875	325	64916712	19	184	13.6
1	64975150	64975450	300	64975287	33	265	9.5
1	65305150	65305450	300	65305312	34	269	4.1
1	65734725	65734850	125	65734737	23	92	10.2
1	66199575	66199950	375	66199687	16	165	8.9
1	66894075	66894375	300	66894187	27	238	4.1
1	67240925	67241150	225	67241037	20	146	0
1	67868875	67869575	700	67869112	73	811	7.5
1	68237750	68238075	325	68237937	16	166	5.5
1	69393250	69393450	200	69393312	16	96	3.4
1	70739950	70740300	350	70740112	54	478	10.9
1	70968775	70969125	350	70968962	49	446	19.8
1	71464850	71465125	275	71465012	21	164	6.8
1	71543525	71543725	200	71543662	15	107	2
1	71579150	71579550	400	71579362	75	675	4.8
1	71583950	71584150	200	71584112	29	180	15.7
1	71606725	71607025	300	71606862	35	303	18.4
1	72138500	72138750	250	72138587	34	247	10.9
1	72140575	72140825	250	72140712	18	143	4.8
1	72162150	72162600	450	72162362	196	1887	29.3
1	72175925	72176325	400	72176062	44	454	12.3
1	72188300	72188550	250	72188462	38	314	28.6
1	72246025	72246575	550	72246387	29	319	11.6
1	72424050	72424300	250	72424187	22	169	2.7
1	72510575	72510900	325	72510712	40	363	31.4
1	72516475	72516500	25	72516487	20	20	2
1	72605200	72605775	575	72605662	30	336	16.4
1	72730575	72730800	225	72730712	19	139	4.1
1	72738675	72738925	250	72738837	23	178	6.1
1	72739500	72739750	250	72739612	23	189	11.6
1	72746325	72746525	200	72746462	19	124	4.1
1	72760925	72761075	150	72761037	15	78	5.5
1	72893550	72893750	200	72893687	20	139	8.9
1	73433900	73434200	300	73434037	31	259	7.5
1	73576000	73576350	350	73576162	49	427	0
1	74044550	74044875	325	74044687	47	441	23.2
1	74112925	74113150	225	74112987	23	171	13.6
1	74178800	74179000	200	74178912	15	103	0.7
1	74240475	74240650	175	74240562	15	90	4.1
1	74277375	74277825	450	74277637	21	295	15
1	74320125	74320250	125	74320162	20	88	6.8
1	74388900	74389100	200	74389012	18	108	12.3
1	74441050	74441250	200	74441137	15	98	7.5
1	74515850	74516100	250	74515987	24	168	8.9
1	74757900	74758550	650	74758337	119	1376	50.4
1	74784475	74784900	425	74784712	53	521	19.1
1	74826325	74826475	150	74826437	17	77	4.1
1	74960200	74960525	325	74960337	32	277	10.9
1	75326250	75326550	300	75326387	62	508	23.2
1	75362475	75362675	200	75362637	17	110	6.1
1	75395150	75395475	325	75395237	24	254	17
1	75471950	75472300	350	75472137	52	497	42.3
1	75484850	75485200	350	75485012	35	328	8.9
1	75499925	75500175	250	75500112	27	200	8.9
1	75587875	75588150	275	75588012	15	134	5.5
1	75667625	75667775	150	75667737	15	75	1.4
1	75687575	75687975	400	75687787	101	918	18.4
1	75746025	75746225	200	75746137	15	94	0
1	75771825	75772325	500	75772137	29	377	23.2
1	75785175	75785400	225	75785287	21	144	0
1	75880350	75880600	250	75880512	17	137	4.1
1	75912225	75912775	550	75912412	42	518	10.2
1	75919300	75919775	475	75919512	17	239	5.5
1	77323700	77323950	250	77323787	21	163	15.7
1	77330450	77330550	100	77330462	21	73	7.5
1	77334700	77335000	300	77334862	22	175	6.8
1	77335850	77336150	300	77336012	23	203	5.5
1	77337075	77337350	275	77337212	20	161	12.3
1	77339750	77340200	450	77340037	30	373	34.1
1	77355800	77356125	325	77355987	46	398	18.4
1	77379825	77380475	650	77380212	46	649	25.9
1	77386150	77386300	150	77386162	17	74	8.9
1	77388050	77388275	225	77388137	15	100	5.5
1	77512925	77513375	450	77513187	42	444	14.3
1	78003025	78003375	350	78003212	76	641	7.5
1	78051175	78051450	275	78051287	30	242	6.8
1	78303550	78303750	200	78303637	18	114	0
1	78372400	78372500	100	78372412	15	46	4.1
1	78392900	78393125	225	78392962	18	145	8.9
1	78536550	78537000	450	78536862	37	376	18.4
1	79654975	79655150	175	79655112	15	89	9.5
1	80115225	80115450	225	80115362	17	127	4.8
1	80116375	80116925	550	80116637	77	865	21.8
1	80194850	80195175	325	80194987	28	250	0
1	80282500	80282825	325	80282587	35	338	11.6
1	81456725	81456925	200	81456812	15	99	4.8
1	81597325	81597575	250	81597512	16	130	0
1	82720125	82720250	125	82720137	20	74	4.1
1	82827750	82827950	200	82827787	16	107	4.8
1	82917375	82917700	325	82917512	38	344	37.5
1	84056100	84056450	350	84056237	54	519	17.7
1	84096775	84096975	200	84096912	20	134	8.9
1	84284625	84284825	200	84284712	16	107	3.4
1	84510300	84510575	275	84510437	16	138	8.9
1	84516400	84516600	200	84516487	15	102	8.2
1	84519625	84519850	225	84519737	19	138	4.1
1	84739725	84740075	350	84739887	18	203	7.5
1	84751025	84751425	400	84751262	31	371	11.6
1	84769250	84769400	150	84769287	22	107	4.8
1	87855675	87855875	200	87855787	16	102	4.8
1	87863625	87863875	250	87863687	37	242	19.8
1	88019000	88019325	325	88019187	20	187	17
1	88032475	88032900	425	88032712	54	571	8.9
1	88140450	88140900	450	88140612	79	771	27.3
1	88141925	88143200	1275	88142262	123	1926	51.1
1	88180000	88180300	300	88180187	17	151	13.6
1	88318725	88318775	50	88318762	15	29	2.7
1	88319925	88320325	400	88320087	43	458	40.2
1	88550550	88550825	275	88550662	28	217	19.1
1	88583325	88583475	150	88583412	20	106	6.1
1	88589325	88589525	200	88589437	16	110	7.5
1	88749225	88749475	250	88749362	17	135	1.4
1	89056050	89056350	300	89056162	15	152	0.7
1	89057525	89058100	575	89057712	86	1131	36.8
1	89061825	89062075	250	89061912	40	315	17
1	89144350	89144725	375	89144487	56	515	6.8
1	89144975	89145350	375	89145137	36	357	12.3
1	89560275	89560625	350	89560437	55	480	8.9
1	90439400	90439725	325	90439587	24	219	8.2
1	90440075	90440375	300	90440187	53	426	15
1	90444100	90444425	325	90444237	32	291	10.2
1	90500000	90500575	575	90500187	103	1078	29.3
1	90605575	90605650	75	90605587	15	37	0.7
1	90631650	90631800	150	90631762	18	90	4.1
1	90638050	90638325	275	90638162	24	196	13.6
1	90641125	90641350	225	90641212	32	218	10.9
1	90644500	90644775	275	90644612	26	204	4.8
1	90755575	90755750	175	90755587	25	131	6.8
1	90827150	90827350	200	90827262	22	134	2
1	90856400	90856550	150	90856437	16	83	8.9
1	90903925	90904000	75	90903937	15	39	2.7
1	91113825	91113950	125	91113887	15	63	4.1
1	91587550	91587975	425	91587737	71	690	10.9
1	91652650	91652850	200	91652737	18	122	4.8
1	91701775	91702200	425	91701937	23	278	11.6
1	91707500	91708225	725	91707662	60	770	27.3
1	91709625	91709925	300	91709787	32	257	11.6
1	91765925	91766125	200	91765987	15	102	7.5
1	91767150	91767400	250	91767262	24	173	5.5
1	91891325	91891600	275	91891487	26	199	10.2
1	92033825	92033975	150	92033837	18	91	8.9
1	92358425	92358750	325	92358587	25	228	13
1	92374250	92374425	175	92374337	19	108	3.4
1	92869050	92869325	275	92869162	22	176	7.5
1	93141800	93142125	325	93141962	24	214	8.9
1	93243550	93243625	75	93243612	22	56	6.8
1	93750600	93750900	300	93750762	21	168	6.8
1	93792750	93792950	200	93792837	15	98	4.1
1	93949775	93950100	325	93949937	20	195	9.5
1	94178650	94178800	150	94178787	15	73	2
1	94262500	94262825	325	94262687	72	574	32.7
1	94350525	94350800	275	94350637	29	229	5.5
1	94537925	94538150	225	94538062	19	148	0
1	96725975	96726150	175	96726037	15	92	4.1
1	96823850	96824125	275	96823987	30	240	4.1
1	97432525	97432775	250	97432687	18	139	0
1	98313325	98313600	275	98313487	22	172	6.8
1	98577150	98577450	300	98577287	23	206	0.7
1	98705050	98705400	350	98705212	22	226	8.9
1	99453150	99453550	400	99453362	42	404	12.3
1	99903525	99904000	475	99903737	61	671	8.2
1	99916850	99917250	400	99917012	52	491	16.4
1	101453225	101453425	200	101453287	15	102	0
1	101738050	101738200	150	101738137	16	78	7.5
1	102708200	102708700	500	102708387	66	746	15
1	103456000	103456375	375	103456162	25	267	0
1	103601150	103601450	300	103601287	17	150	5.5
1	104921475	104921825	350	104921612	33	317	0
1	105300200	105300400	200	105300237	15	104	0
1	106642900	106643075	175	106642987	15	92	0
1	106898600	106898925	325	106898737	31	268	5.5
1	106922600	106922950	350	106922762	46	418	8.9
1	107318950	107319225	275	107319062	16	145	4.1
1	107349900	107350200	300	107350062	25	186	8.2
1	107730875	107731075	200	107730937	15	104	0
1	108004550	108004775	225	108004662	17	126	0
1	108391950	108392350	400	108392137	62	617	1.4
1	108549600	108549825	225	108549762	32	226	9.5
1	109805950	109806350	400	109806162	50	487	15.7
1	112618275	112618475	200	112618312	17	112	4.1
1	115792025	115792275	250	115792137	23	183	4.1
1	118882400	118882650	250	118882537	29	212	4.1
1	120452825	120453400	575	120453137	87	1084	17.7
1	120470150	120470475	325	120470312	31	256	3.4
1	120473350	120473525	175	120473387	18	101	7.5
1	120475550	120475900	350	120475712	92	864	33.4
1	120604050	120604375	325	120604212	30	261	8.2
1	120831350	120831625	275	120831462	20	171	4.8
1	120876575	120876950	375	120876737	101	891	27.9
1	120903300	120903975	675	120903737	71	907	17
1	120975150	120975425	275	120975312	17	140	6.8
1	120984825	120985150	325	120984987	27	248	8.2
1	121127450	121127625	175	121127587	26	145	17
1	121132775	121133425	650	121132912	29	458	16.4
1	121175300	121175675	375	121175487	57	513	18.4
1	121176025	121176400	375	121176162	65	617	18.4
1	121216300	121216525	225	121216387	24	151	8.9
1	121281225	121281550	325	121281362	32	289	9.5
1	121298350	121298575	225	121298462	17	126	1.4
1	121325125	121325500	375	121325312	45	435	17.7
1	121393400	121393650	250	121393537	21	154	10.9
1	121462300	121462675	375	121462487	66	593	8.2
1	121908300	121908500	200	121908387	17	105	4.1
1	122181925	122182325	400	122182162	45	452	6.8
1	122471425	122472000	575	122471612	18	320	17
1	122586975	122587300	325	122587112	38	348	12.3
1	122914675	122915425	750	122914862	88	1031	43.6
1	122950950	122951350	400	122951112	20	237	10.9
1	123670325	123670575	250	123670437	19	134	8.2
1	124282825	124283050	225	124282912	15	114	4.8
1	124434850	124435250	400	124435037	53	501	9.5
1	124892775	124893100	325	124892912	33	287	5.5
1	125629050	125629325	275	125629187	19	149	0
1	126002300	126002650	350	126002512	51	464	4.8
1	127515525	127515825	300	127515712	24	207	7.5
1	127799575	127799825	250	127799687	20	150	0
1	127900275	127900475	200	127900387	15	98	0
1	127956675	127957075	400	127956887	106	941	13
1	128205250	128205475	225	128205362	16	117	4.8
1	128502700	128502875	175	128502762	21	130	7.5
1	128995300	128995425	125	128995387	19	84	5.5
1	129062825	129062975	150	129062862	18	85	8.9
1	129066550	129066800	250	129066662	15	124	5.5
1	129888550	129888775	225	129888687	20	139	2
1	129922225	129922600	375	129922412	50	461	6.8
1	130171875	130172075	200	130171987	18	111	9.5
1	130219950	130220300	350	130220112	41	392	21.1
1	130226300	130226500	200	130226412	15	94	4.1
1	130227875	130228200	325	130228062	42	382	33.4
1	130687500	130688000	500	130687737	59	681	10.9
1	132848050	132848650	600	132848537	18	269	21.1
1	133574975	133575200	225	133575062	19	128	0.7
1	133694525	133694925	400	133694737	31	323	15.7
1	133717600	133718175	575	133717987	83	989	8.2
1	133719050	133719275	225	133719137	19	140	4.8
1	133737375	133737525	150	133737462	21	116	12.3
1	134025275	134025550	275	134025462	21	170	5.5
1	134028400	134028800	400	134028612	45	449	4.1
1	134049750	134050050	300	134049912	38	295	2.7
1	134065250	134065625	375	134065437	44	410	34.8
1	134091075	134091325	250	134091162	15	130	2.7
1	134109325	134109675	350	134109612	28	295	32
1	134115800	134116225	425	134115962	54	623	24.5
1	134298550	134298975	425	134298737	45	455	14.3
1	134627725	134628025	300	134627912	16	159	5.5
1	134661575	134661650	75	134661637	17	44	4.8
1	134678375	134678750	375	134678537	131	1181	49.1
1	134706450	134706875	425	134706687	56	567	17.7
1	134808800	134809175	375	134808987	61	561	23.2
1	134846850	134847125	275	134847037	47	361	25.9
1	134861225	134861300	75	134861287	19	46	4.8
1	134923025	134923250	225	134923137	18	130	3.4
1	134956925	134957025	100	134956987	18	59	6.1
1	135036600	135036900	300	135036737	50	407	16.4
1	135174625	135174900	275	135174762	19	159	4.8
1	135225075	135225500	425	135225287	104	1041	12.3
1	135321025	135321200	175	135321062	16	92	0
1	135495100	135495600	500	135495387	96	929	19.8
1	135510775	135511200	425	135511037	84	832	32
1	135668700	135668925	225	135668812	18	123	0.7
1	135672525	135672750	225	135672612	27	201	13.6
1	135879450	135879600	150	135879562	15	76	6.8
1	136005300	136005800	500	136005462	27	349	17.7
1	136308850	136309050	200	136308962	19	135	17
1	136317400	136317675	275	136317487	20	157	1.4
1	136351425	136351825	400	136351637	49	502	14.3
1	136376425	136376550	125	136376537	21	88	8.2
1	136387075	136387400	325	136387212	40	361	17.7
1	136390050	136390250	200	136390112	17	119	9.5
1	136591525	136591775	250	136591612	20	157	2
1	137002375	137002675	300	137002562	32	287	11.6
1	137015650	137015675	25	137015662	15	15	1.4
1	137034025	137034175	150	137034137	18	91	10.2
1	137074925	137075075	150	137074987	28	150	13
1	137159825	137160025	200	137159887	15	96	0
1	137160500	137160775	275	137160637	37	291	6.8
1	137324200	137324525	325	137324387	70	630	21.8
1	137416750	137416950	200	137416862	16	97	1.4
1	137448625	137448975	350	137448812	77	632	13.6
1	137454200	137454425	225	137454262	19	137	15
1	137471850	137472075	225	137471912	25	190	10.2
1	137492175	137492400	225	137492237	15	112	10.9
1	137493350	137493750	400	137493537	140	1243	34.8
1	137955500	137955775	275	137955612	24	190	10.9
1	138049625	138049825	200	138049787	25	167	20.4
1	138243975	138244375	400	138244162	78	731	45.7
1	138287175	138287350	175	138287187	20	115	4.8
1	138386225	138387075	850	138386862	90	1240	42.3
1	138429600	138429950	350	138429787	45	402	9.5
1	138491200	138491900	700	138491312	86	1338	84.5
1	138506575	138506700	125	138506637	18	83	9.5
1	138511550	138511650	100	138511587	18	61	6.1
1	138512300	138512650	350	138512437	32	312	17.7
1	138515250	138515450	200	138515362	16	105	6.1
1	138544200	138544725	525	138544437	80	947	27.3
1	138598150	138598425	275	138598262	32	253	12.3
1	138761900	138762025	125	138761912	16	68	8.2
1	138770000	138770350	350	138770187	35	340	17.7
1	138868000	138868300	300	138868162	28	218	0
1	139194975	139195325	350	139195162	70	586	6.1
1	139970575	139970800	225	139970637	16	126	4.8
1	140083425	140083675	250	140083537	24	189	5.5
1	140420375	140420625	250	140420487	22	171	9.5
1	141242200	141242425	225	141242312	18	124	4.1
1	141310950	141311475	525	141311212	78	907	23.2
1	141316400	141316650	250	141316587	17	142	4.8
1	142005000	142005200	200	142005162	16	111	0
1	142061900	142062225	325	142062037	52	451	30
1	142245700	142246100	400	142245887	80	717	6.8
1	142251250	142251650	400	142251462	79	722	25.2
1	142329850	142330225	375	142330037	37	379	0
1	145081725	145081875	150	145081762	15	69	3.4
1	145317750	145318050	300	145317937	35	298	15.7
1	145493925	145494325	400	145494062	53	515	16.4
1	145496200	145496600	400	145496387	70	679	17
1	148691825	148692025	200	148691912	19	119	0
1	150615975	150616175	200	150616112	18	122	5.5
1	150836975	150837175	200	150837062	16	108	8.2
1	151877750	151878100	350	151877912	21	208	4.1
1	152259125	152259550	425	152259312	79	735	19.8
1	152567850	152567975	125	152567862	16	67	1.4
1	152939600	152939925	325	152939787	52	478	27.3
1	152982425	152982675	250	152982537	22	157	0
1	153055850	153056225	375	153056037	27	293	9.5
1	153277950	153278325	375	153278162	39	365	21.1
1	153306875	153307125	250	153306962	19	139	12.3
1	153475025	153475275	250	153475162	16	116	8.2
1	153640675	153640800	125	153640762	17	73	4.1
1	153832675	153833025	350	153832862	57	484	7.5
1	154176925	154177125	200	154176987	19	130	4.1
1	154335350	154335750	400	154335562	44	432	8.9
1	154366100	154366175	75	154366112	17	41	2.7
1	154579650	154579925	275	154579812	23	187	8.2
1	154677900	154678275	375	154678062	34	346	23.2
1	154679825	154680175	350	154679987	59	525	35.4
1	154705325	154705475	150	154705337	15	82	2.7
1	154735950	154736575	625	154736187	61	722	5.5
1	154799900	154800250	350	154800062	70	604	36.8
1	154855375	154855725	350	154855537	47	446	17.7
1	154857450	154857950	500	154857762	97	1081	27.3
1	154861025	154861225	200	154861037	15	79	7.5
1	154978700	154978925	225	154978787	23	175	10.2
1	155078575	155078725	150	155078687	19	102	10.2
1	155082900	155083100	200	155083037	17	114	9.5
1	155110000	155110250	250	155110162	24	185	10.2
1	155138600	155139175	575	155138962	25	421	15
1	155255825	155255975	150	155255837	18	83	5.5
1	155352400	155352775	375	155352587	48	463	17.7
1	155503025	155503300	275	155503137	22	183	12.3
1	155528775	155528875	100	155528787	21	78	8.2
1	155842825	155843675	850	155843012	34	670	56.6
1	156797425	156797625	200	156797587	18	127	10.2
1	157246500	157246700	200	157246562	16	107	1.4
1	158402050	158402375	325	158402187	45	360	9.5
1	158504325	158504425	100	158504387	15	48	2
1	158505350	158505725	375	158505462	42	424	5.5
1	158506425	158506650	225	158506537	18	140	15
1	158775400	158775675	275	158775512	19	167	15
1	158798100	158798350	250	158798262	35	257	12.3
1	158816525	158816725	200	158816587	22	136	8.2
1	158820150	158820500	350	158820362	31	291	23.2
1	158831525	158831750	225	158831612	22	171	5.5
1	159295650	159296000	350	159295812	42	394	13
1	160131525	160131800	275	160131662	23	171	5.5
1	160192900	160193175	275	160192987	26	217	17
1	160198625	160198925	300	160198737	20	180	5.5
1	160223575	160223900	325	160223712	47	410	0.7
1	161179025	161179275	250	161179112	18	133	0
1	162046550	162046875	325	162046687	62	546	15.7
1	162054700	162055050	350	162054862	17	168	5.5
1	162145875	162146050	175	162145887	18	116	6.8
1	162146775	162147100	325	162146937	50	431	23.2
1	162148550	162148875	325	162148712	28	239	12.3
1	162237400	162237600	200	162237487	15	98	2.7
1	162488350	162488600	250	162488437	18	148	6.8
1	162876400	162876650	250	162876537	19	162	15
1	163017475	163017650	175	163017512	23	132	11.6
1	163110800	163111150	350	163110912	29	313	10.2
1	163216375	163216625	250	163216462	23	179	0
1	163289350	163289650	300	163289512	24	193	9.5
1	163714300	163714600	300	163714412	36	316	9.5
1	163757475	163757725	250	163757562	33	256	15.7
1	165000400	165000625	225	165000487	18	134	5.5
1	165838575	165838850	275	165838712	21	170	10.2
1	165856475	165856775	300	165856637	44	375	19.1
1	166213725	166214050	325	166213912	87	763	18.4
1	166307800	166307950	150	166307837	17	79	6.8
1	166330825	166331425	600	166330962	62	820	51.1
1	166340100	166340500	400	166340312	41	429	14.3
1	166359000	166359450	450	166359137	33	358	18.4
1	167450700	167450900	200	167450812	15	97	4.8
1	167515500	167515800	300	167515662	35	282	0
1	167608775	167608925	150	167608887	15	73	4.1
1	167961800	167962200	400	167962012	80	824	32
1	167979000	167979350	350	167979162	32	284	6.8
1	168001325	168001600	275	168001437	23	175	5.5
1	168137300	168137525	225	168137362	32	223	10.9
1	168882875	168883025	150	168882987	16	83	3.4
1	168896225	168896425	200	168896337	16	98	8.9
1	168906275	168906500	225	168906337	15	110	1.4
1	168930325	168930450	125	168930412	17	69	6.1
1	169108000	169108150	150	169108062	17	92	6.1
1	169118850	169119175	325	169118987	36	299	10.9
1	169124325	169124500	175	169124437	15	82	7.5
1	169126775	169126875	100	169126787	17	54	5.5
1	169285275	169285575	300	169285412	37	292	29.3
1	169334575	169335075	500	169334812	57	639	26.6
1	169752600	169752825	225	169752712	16	120	5.5
1	171671250	171671525	275	171671387	24	197	6.8
1	171899750	171899900	150	171899812	20	96	8.2
1	172314325	172314750	425	172314512	71	736	0
1	172533200	172533400	200	172533362	16	99	3.4
1	172705275	172705375	100	172705287	17	68	6.8
1	172708325	172708450	125	172708337	22	79	9.5
1	172726050	172726375	325	172726187	42	373	9.5
1	172926650	172927050	400	172926837	39	397	20.4
1	173058225	173058300	75	173058262	24	65	6.8
1	173156375	173156700	325	173156512	42	360	36.8
1	173216675	173216825	150	173216762	15	79	6.8
1	173256400	173256550	150	173256487	29	156	17
1	173308100	173308475	375	173308287	68	611	0
1	173338300	173338500	200	173338387	19	123	5.5
1	173340200	173340375	175	173340212	16	76	4.8
1	173944400	173944700	300	173944562	31	238	10.9
1	174098475	174098725	250	174098587	18	132	10.9
1	174160000	174160275	275	174160187	28	225	9.5
1	174254875	174255250	375	174255062	82	688	42.3
1	174263175	174263325	150	174263312	22	109	8.2
1	174292125	174292325	200	174292212	20	131	10.9
1	174538125	174538350	225	174538187	21	151	4.8
1	175158550	175158775	225	175158662	17	122	2
1	175185225	175185500	275	175185362	22	193	7.5
1	175226500	175226875	375	175226687	79	701	24.5
1	175255525	175255800	275	175255637	33	261	22.5
1	176009250	176009550	300	176009362	25	197	10.9
1	176263275	176263550	275	176263412	19	143	5.5
1	176565575	176565825	250	176565637	18	144	0
1	176860825	176861150	325	176860987	29	269	0
1	178470975	178471150	175	178471062	15	91	0.7
1	178480800	178481300	500	178481112	29	393	10.2
1	178560775	178561000	225	178560937	18	117	11.6
1	178831000	178831200	200	178831062	20	127	10.2
1	179002575	179002800	225	179002687	18	118	0
1	179590100	179590500	400	179590312	73	687	4.8
1	180120700	180120900	200	180120737	16	98	0
1	180128250	180128625	375	180128512	21	235	14.3
1	180144250	180144450	200	180144387	16	104	0
1	180174750	180175100	350	180174937	46	408	6.8
1	180243550	180243825	275	180243687	27	209	7.5
1	180571350	180571625	275	180571437	25	209	4.8
1	180687250	180687625	375	180687437	72	650	6.1
1	180924200	180924650	450	180924412	35	417	14.3
1	181109000	181109125	125	181109112	19	73	7.5
1	181113575	181113900	325	181113737	40	342	4.1
1	181415450	181415650	200	181415587	16	104	4.8
1	181441175	181441525	350	181441362	59	486	8.9
1	182116600	182116725	125	182116612	17	71	5.5
1	182317050	182317400	350	182317212	38	346	14.3
1	182407825	182408250	425	182408062	65	695	24.5
1	182725300	182725850	550	182725487	177	1848	55.2
1	182761400	182761775	375	182761587	219	2109	59.3
1	182770375	182770800	425	182770537	193	1648	27.9
1	182816300	182816525	225	182816412	15	104	7.5
1	183579100	183579275	175	183579187	16	87	4.8
1	183790175	183790575	400	183790412	63	588	28.6
1	183854975	183855275	300	183855162	21	200	13.6
1	183866750	183867500	750	183866987	66	1140	32
1	183931100	183931450	350	183931312	32	303	29.3
1	183940200	183940325	125	183940262	18	85	8.9
1	183999650	184000100	450	183999862	111	1076	14.3
1	184018525	184018725	200	184018587	16	100	4.1
1	184027875	184028200	325	184028037	53	455	4.8
1	184081950	184082150	200	184082087	17	111	0
1	185720575	185720900	325	185720737	17	156	5.5
1	185735150	185735500	350	185735362	34	349	21.8
1	186197825	186198175	350	186198012	29	270	5.5
1	186799800	186800125	325	186799962	51	429	14.3
1	186805775	186806075	300	186805962	39	342	20.4
1	186850075	186850350	275	186850212	24	198	4.1
1	186909525	186909750	225	186909637	17	127	2
1	187189075	187189350	275	187189212	30	242	9.5
1	187937175	187937400	225	187937237	15	116	2.7
1	188211250	188211725	475	188211487	91	975	23.2
1	188214525	188215000	475	188214812	66	688	27.3
1	188268225	188268525	300	188268387	23	178	0
1	188458000	188458300	300	188458187	28	219	3.4
1	188623550	188623925	375	188623737	88	782	13.6
1	188630025	188630350	325	188630187	44	379	10.9
1	188677575	188677825	250	188677737	26	204	8.2
1	188934150	188934425	275	188934237	19	172	0
1	188983225	188983500	275	188983362	15	136	11.6
1	189153000	189153225	225	189153112	16	111	6.1
1	189278950	189279150	200	189279062	16	95	6.1
1	189304925	189305175	250	189305062	19	140	22.5
1	189425425	189425775	350	189425587	36	332	0.7
1	190340550	190340800	250	190340637	23	179	2.7
1	190554975	190555425	450	190555162	110	1094	25.9
1	190696425	190696650	225	190696562	23	165	9.5
1	190699450	190699875	425	190699712	46	520	2.7
1	190707175	190707550	375	190707312	29	293	21.1
1	190714225	190714500	275	190714337	45	363	30.7
1	191309475	191309725	250	191309612	27	220	18.4
1	191440800	191441150	350	191440987	22	221	6.1
1	191462325	191462725	400	191462462	25	309	13
1	191617200	191617525	325	191617362	67	607	26.6
1	191832175	191832525	350	191832337	29	272	10.2
1	191999575	191999850	275	191999687	17	139	0.7
1	192148600	192148925	325	192148762	25	245	15
1	192715050	192715250	200	192715112	16	103	4.8
1	193362400	193362725	325	193362562	31	265	3.4
1	193399100	193399325	225	193399137	18	139	8.2
1	193631175	193631525	350	193631362	31	282	10.2
1	193646950	193647150	200	193647087	15	98	7.5
1	194216100	194216500	400	194216287	93	869	15.7
1	194223575	194223800	225	194223662	17	134	4.1
1	194465275	194465575	300	194465437	24	213	3.4
1	194535400	194535725	325	194535537	71	574	34.8
1	194547675	194547900	225	194547762	18	135	3.4
1	194571000	194571400	400	194571237	25	302	15.7
1	195167100	195167325	225	195167212	15	112	7.5
1	195210800	195210925	125	195210887	15	68	4.8
1	195239150	195239675	525	195239487	15	258	34.1
1	195243075	195243425	350	195243237	23	243	15.7
1	195432750	195433250	500	195433012	34	428	14.3
1	196206675	196206975	300	196206787	24	215	6.8
1	196316850	196317200	350	196317012	42	363	5.5
1	196447450	196447775	325	196447637	18	172	5.5
1	196701825	196702025	200	196702012	28	172	10.2
3	3652425	3652675	250	3652562	28	219	0
3	3653500	3653700	200	3653662	18	113	0
3	4132675	4132875	200	4132737	21	160	0
3	5410550	5410800	250	5410687	20	149	6.1
3	6156875	6157250	375	6157037	68	642	8.9
3	6484425	6484625	200	6484512	15	93	0
3	6746600	6746925	325	6746762	42	348	5.5
3	7493200	7493450	250	7493312	21	168	0.7
3	7562425	7563050	625	7562737	26	441	26.6
3	7682400	7682625	225	7682512	23	163	2.7
3	7988725	7989125	400	7988912	36	389	10.2
3	8229075	8229175	100	8229087	58	142	6.1
3	8452675	8452975	300	8452787	27	235	12.3
3	8849600	8849850	250	8849712	21	161	12.3
3	8991675	8992125	450	8991862	67	652	15.7
3	9081550	9081875	325	9081737	22	210	5.5
3	9091000	9091300	300	9091137	18	164	6.8
3	9142325	9142525	200	9142362	36	210	13.6
3	9227050	9227350	300	9227162	26	223	7.5
3	9309725	9310025	300	9309862	30	259	17
3	9503100	9503425	325	9503287	22	225	26.6
3	9507500	9507800	300	9507637	32	270	2.7
3	9574900	9575100	200	9575012	45	301	22.5
3	9629300	9629600	300	9629437	30	241	10.2
3	9637550	9637850	300	9637687	29	254	4.8
3	11065875	11066225	350	11066037	21	201	10.9
3	11193975	11194250	275	11194087	24	181	0
3	11194975	11195225	250	11195062	24	188	4.8
3	13389650	13389925	275	13389762	18	159	13.6
3	14423450	14423750	300	14423637	17	140	3.4
3	14455350	14455625	275	14455487	19	150	0
3	14598150	14598375	225	14598212	23	158	14.3
3	14840025	14840225	200	14840112	20	133	8.9
3	14936375	14936675	300	14936512	45	365	5.5
3	14976550	14976925	375	14976687	26	274	9.5
3	14977350	14977750	400	14977587	50	482	15
3	17081825	17082025	200	17081912	16	102	0
3	17133450	17133800	350	17133612	59	507	10.9
3	17430650	17430850	200	17430712	19	129	4.8
3	17681875	17682250	375	17682062	111	959	15
3	17979225	17979675	450	17979437	97	963	21.8
3	18042200	18042475	275	18042312	18	157	8.9
3	18816075	18816600	525	18816237	154	1612	28.6
3	18887575	18887950	375	18887762	74	655	14.3
3	19381025	19381325	300	19381187	31	266	15
3	19482700	19482925	225	19482812	19	134	14.3
3	19899050	19899425	375	19899212	26	278	27.9
3	20215950	20216375	425	20216112	48	469	6.8
3	20250300	20250600	300	20250437	28	234	4.1
3	20387425	20387625	200	20387562	17	98	1.4
3	21863525	21863975	450	21863762	65	680	5.5
3	21919075	21919475	400	21919237	41	432	10.2
3	22040950	22041150	200	22041112	17	108	3.4
3	22057700	22057925	225	22057812	15	119	6.1
3	22083275	22083625	350	22083437	95	820	26.6
3	22126650	22127250	600	22127187	22	301	39.5
3	22225375	22225725	350	22225562	41	360	0
3	22266000	22266250	250	22266187	16	141	13
3	22384050	22384325	275	22384187	31	243	15
3	23648900	23649200	300	23649087	31	268	0
3	27111850	27112225	375	27112012	32	339	19.1
3	27219275	27219350	75	27219312	15	39	0
3	27236425	27236650	225	27236537	19	136	1.4
3	27254525	27254600	75	27254587	16	44	3.4
3	27254875	27255350	475	27255037	46	499	30.7
3	27346100	27346250	150	27346162	15	83	4.1
3	27381975	27382200	225	27382062	20	139	0
3	27474125	27474525	400	27474337	55	559	40.9
3	27597575	27597775	200	27597687	15	95	0
3	27787750	27788125	375	27787937	47	464	5.5
3	28126700	28127050	350	28126862	53	478	8.2
3	28212725	28212875	150	28212812	19	100	4.8
3	28229150	28229500	350	28229312	22	210	4.8
3	28282450	28282725	275	28282587	22	178	2.7
3	28408125	28408375	250	28408237	24	184	13
3	28461125	28461300	175	28461212	17	98	6.8
3	28825925	28826175	250	28826037	25	190	0
3	28843650	28844000	350	28843812	50	450	16.4
3	28996375	28996625	250	28996462	20	161	13
3	29033350	29033725	375	29033537	109	914	20.4
3	29326600	29326925	325	29326762	29	261	0
3	29327150	29327475	325	29327312	35	298	0
3	29795425	29795675	250	29795562	18	127	0
3	30264725	30265000	275	30264837	18	155	2.7
3	30473250	30473450	200	30473337	16	109	8.9
3	30792950	30793125	175	30792987	20	112	9.5
3	30839325	30839600	275	30839462	19	145	1.4
3	30840925	30841100	175	30840987	19	109	2
3	30865325	30865650	325	30865487	21	192	0
3	30915000	30915625	625	30915462	148	1499	53.2
3	30952775	30953025	250	30952887	19	145	10.9
3	31079925	31080300	375	31080112	54	508	0
3	31192225	31192525	300	31192337	33	263	16.4
3	31195750	31196025	275	31195862	27	225	10.9
3	31197675	31198050	375	31197862	36	361	13
3	31208450	31208950	500	31208687	35	455	10.9
3	31278200	31278500	300	31278312	30	244	7.5
3	31279950	31280650	700	31280412	62	686	2.7
3	31590075	31590450	375	31590287	20	217	0
3	32094425	32094650	225	32094537	17	123	11.6
3	32556650	32556850	200	32556762	23	155	13.6
3	32821800	32822100	300	32821962	26	217	19.1
3	32950125	32950500	375	32950312	51	463	14.3
3	32950825	32951050	225	32950962	16	117	0
3	32954425	32954900	475	32954712	53	611	5.5
3	33025375	33025625	250	33025512	38	283	12.3
3	33142950	33143175	225	33143012	15	119	3.4
3	34064975	34065425	450	34065212	35	425	20.4
3	34182125	34182750	625	34182237	24	328	20.4
3	34199200	34199500	300	34199312	35	301	5.5
3	34227250	34227575	325	34227437	31	272	5.5
3	34635750	34636000	250	34635887	19	133	0
3	34636950	34637175	225	34637037	16	116	7.5
3	34661650	34661850	200	34661737	15	92	0
3	34673775	34673875	100	34673862	22	81	4.1
3	34837675	34838175	500	34837937	173	1756	17.7
3	34841225	34841650	425	34841487	19	236	14.3
3	34845425	34845800	375	34845612	190	1629	29.3
3	34859975	34860350	375	34860162	108	1036	45.7
3	34926475	34926850	375	34926662	32	340	12.3
3	34936775	34937075	300	34936962	32	285	19.1
3	34947900	34948625	725	34948187	44	843	29.3
3	34949325	34949825	500	34949587	179	1760	35.4
3	34951700	34952225	525	34952037	33	454	36.1
3	34952625	34953275	650	34952887	45	764	38.9
3	34956275	34956425	150	34956362	19	90	5.5
3	34978675	34979100	425	34978912	44	478	18.4
3	35141525	35141800	275	35141687	31	260	6.8
3	35524500	35524625	125	35524612	22	81	9.5
3	35702725	35702975	250	35702812	16	123	0
3	35913450	35913650	200	35913637	18	121	4.8
3	36131700	36131925	225	36131787	17	116	8.9
3	36414850	36415250	400	36415037	96	889	26.6
3	36502925	36503150	225	36503062	16	118	2.7
3	36697375	36697625	250	36697512	20	161	8.9
3	36713675	36714000	325	36713837	28	246	8.2
3	36792525	36792725	200	36792587	16	104	6.1
3	37494275	37494475	200	37494362	16	104	4.8
3	37834525	37834725	200	37834637	15	101	2.7
3	37915825	37916000	175	37915837	19	113	11.6
3	37937650	37937850	200	37937712	16	111	4.1
3	37949575	37949950	375	37949762	44	420	32
3	38166900	38167275	375	38167062	39	389	4.8
3	38760150	38760475	325	38760312	29	253	2
3	39274125	39274475	350	39274312	26	255	17.7
3	39411525	39411700	175	39411637	23	126	10.2
3	39526625	39526875	250	39526812	17	139	5.5
3	40647625	40647950	325	40647762	40	351	10.2
3	41114100	41114275	175	41114162	17	102	10.2
3	41196025	41196600	575	41196412	102	1090	11.6
3	41236975	41237250	275	41237112	24	199	0.7
3	41519825	41520050	225	41519887	17	123	6.8
3	42690700	42690950	250	42690787	19	156	4.8
3	44700775	44701025	250	44700912	16	124	9.5
3	45523025	45523300	275	45523137	28	217	0
3	48164025	48164350	325	48164187	26	215	25.2
3	48164850	48165225	375	48165037	56	519	13
3	50829175	50829500	325	50829337	46	384	15.7
3	50970300	50970650	350	50970462	48	450	13
3	51174625	51174925	300	51174787	20	167	4.8
3	51216450	51216600	150	51216587	27	103	12.3
3	51296675	51296875	200	51296712	31	209	15
3	51571825	51572000	175	51571937	23	137	11.6
3	51647525	51647775	250	51647637	16	122	4.1
3	51675675	51675750	75	51675737	15	40	4.1
3	52060625	52060775	150	52060662	20	92	9.5
3	52110450	52110775	325	52110612	42	370	1.4
3	52132650	52132875	225	52132762	19	139	11.6
3	52341950	52342450	500	52342262	103	1165	23.2
3	52474325	52474500	175	52474462	20	110	9.5
3	52488650	52489000	350	52488837	85	735	27.3
3	52501250	52501575	325	52501362	29	297	23.2
3	52650750	52651025	275	52650937	16	133	6.1
3	52693250	52693500	250	52693412	15	110	6.8
3	53052200	53052450	250	53052337	17	128	10.2
3	53545700	53546075	375	53545887	33	331	2.7
3	53681725	53682100	375	53681912	31	327	31.4
3	53686550	53686825	275	53686662	21	169	1.4
3	53738050	53738575	525	53738262	150	1900	45.7
3	53957275	53957675	400	53957412	59	612	16.4
3	54194900	54195125	225	54195012	21	146	0
3	54974400	54974725	325	54974587	32	284	13.6
3	55077950	55078400	450	55078137	100	1009	28.6
3	55851525	55851800	275	55851637	22	178	4.1
3	56390700	56391025	325	56390887	28	244	1.4
3	57376050	57376225	175	57376112	22	115	8.2
3	57663850	57664050	200	57663862	25	127	14.3
3	58208050	58208200	150	58208112	15	79	4.1
3	58460375	58460575	200	58460487	61	403	29.3
3	58592675	58592925	250	58592762	28	216	0
3	58681700	58681775	75	58681712	18	45	4.1
3	59049200	59049725	525	59049587	19	250	14.3
3	59348700	59348950	250	59348837	17	131	4.8
3	59416850	59417125	275	59416987	21	179	5.5
3	59566200	59566375	175	59566287	15	88	4.1
3	60885875	60886050	175	60885937	17	108	11.6
3	60943675	60944125	450	60943862	28	318	13
3	61334375	61334700	325	61334537	87	708	7.5
3	61884050	61884300	250	61884112	27	221	9.5
3	61904750	61905100	350	61904912	43	365	20.4
3	62429800	62430125	325	62429887	25	241	0
3	63026575	63027000	425	63026762	62	597	8.2
3	63332000	63332300	300	63332137	23	203	5.5
3	63730650	63730900	250	63730787	22	162	5.5
3	63878925	63879225	300	63879062	22	180	5.5
3	63922950	63923200	250	63923062	24	180	15.7
3	63987225	63987500	275	63987387	34	275	33.4
3	64052600	64052650	50	64052637	18	30	2.7
3	64353700	64354000	300	64353812	36	282	5.5
3	65736800	65737150	350	65736962	62	536	8.2
3	65738525	65738775	250	65738687	17	139	2
3	65745150	65745650	500	65745437	154	1500	17.7
3	65746625	65747075	450	65747012	30	365	45.7
3	65913025	65913250	225	65913112	20	142	0
3	66775050	66775425	375	66775237	86	780	9.5
3	66823450	66823650	200	66823512	20	134	8.2
3	66885600	66885850	250	66885712	19	136	7.5
3	67591875	67592275	400	67592087	30	347	13
3	68334125	68334400	275	68334262	25	196	4.8
3	68576200	68576425	225	68576312	21	151	5.5
3	68580475	68580850	375	68580662	32	326	32.7
3	68622775	68623050	275	68622912	18	154	7.5
3	68652875	68653550	675	68653112	47	745	29.3
3	69461600	69461800	200	69461662	16	101	0
3	69747825	69748075	250	69747962	21	151	0
3	70548075	70548325	250	70548137	21	168	8.9
3	70551225	70551575	350	70551387	29	247	2.7
3	72946475	72947075	600	72946887	91	1028	21.1
3	73093975	73094300	325	73094162	36	299	0.7
3	73520175	73520650	475	73520437	43	500	13
3	75603825	75604075	250	75603987	20	162	2
3	76160325	76160350	25	76160337	17	17	2
3	79125650	79125825	175	79125812	23	115	6.8
3	79304425	79304875	450	79304587	51	562	14.3
3	79502875	79503275	400	79503087	75	697	20.4
3	79520950	79521225	275	79521087	33	258	6.1
3	79538625	79538825	200	79538737	24	137	9.5
3	79658025	79658225	200	79658062	16	112	5.5
3	81049625	81049850	225	81049787	19	133	0
3	81119000	81119200	200	81119062	15	101	0
3	81120650	81121150	500	81120937	46	619	13.6
3	81188125	81188575	450	81188312	24	320	17.7
3	82081975	82082200	225	82082087	18	136	15
3	82504325	82504625	300	82504487	23	196	5.5
3	83001575	83002150	575	83001737	35	372	9.5
3	83672050	83672450	400	83672262	44	428	4.8
3	83675075	83675375	300	83675187	39	346	20.4
3	83852075	83852375	300	83852187	36	305	7.5
3	83873075	83873350	275	83873212	27	221	4.1
3	84029800	84029950	150	84029887	21	107	8.9
3	84066100	84066800	700	84066312	68	1116	34.8
3	84072325	84072575	250	84072487	17	123	2.7
3	84080550	84080625	75	84080562	18	52	5.5
3	84106800	84107000	200	84106837	33	187	10.9
3	84125075	84125150	75	84125112	18	53	6.1
3	84267675	84268100	425	84267912	62	720	31.4
3	84279875	84280175	300	84279987	24	202	8.2
3	84292450	84292650	200	84292612	23	149	3.4
3	84296775	84296875	100	84296787	19	73	4.8
3	84370850	84371100	250	84371012	16	127	10.9
3	84391425	84391675	250	84391512	17	134	6.8
3	84459800	84460150	350	84459962	27	269	13.6
3	84577750	84577975	225	84577862	17	129	5.5
3	84663350	84663600	250	84663487	29	225	5.5
3	84741050	84741300	250	84741212	27	202	14.3
3	84751525	84751700	175	84751537	17	86	3.4
3	84906825	84907075	250	84907012	19	143	0.7
3	85110925	85111275	350	85111112	44	397	10.9
3	85226500	85226750	250	85226612	16	126	3.4
3	85424100	85424475	375	85424312	60	551	10.2
3	85579650	85579925	275	85579787	16	138	0
3	86096825	86097175	350	86097037	25	247	4.8
3	86235075	86235325	250	86235162	20	158	7.5
3	86763550	86763875	325	86763687	68	573	11.6
3	86778700	86779050	350	86778862	36	340	4.8
3	86918700	86919100	400	86918887	33	357	0
3	86930950	86931300	350	86931112	64	550	19.1
3	86938900	86939225	325	86938912	19	183	13.6
3	87036575	87036925	350	87036737	36	327	10.9
3	87279625	87279950	325	87279812	28	255	10.9
3	87280675	87280900	225	87280812	18	123	0
3	87326900	87327100	200	87327012	20	128	1.4
3	87744300	87744625	325	87744462	21	200	0
3	87824500	87824700	200	87824562	15	100	2
3	88016075	88016125	50	88016112	19	37	4.1
3	88060250	88060850	600	88060412	148	1489	55.2
3	88224400	88224600	200	88224462	29	183	11.6
3	88327075	88327125	50	88327112	22	42	4.8
3	88362700	88363100	400	88362937	75	687	13.6
3	88617400	88617650	250	88617562	37	276	17.7
3	88657800	88658300	500	88658087	158	1854	19.1
3	88661400	88661850	450	88661637	80	785	31.4
3	88848275	88848475	200	88848337	17	115	8.2
3	89311850	89312250	400	89312037	110	1038	56.6
3	89423975	89424175	200	89424062	16	108	11.6
3	89912300	89912625	325	89912437	25	235	10.9
3	89951000	89951275	275	89951137	23	184	4.1
3	90532350	90532725	375	90532612	25	283	40.9
3	92780000	92780375	375	92780187	76	672	12.3
3	93248375	93248750	375	93248562	18	203	10.9
3	93495750	93495950	200	93495812	15	104	4.8
3	93497300	93497725	425	93497512	64	664	10.9
3	93517175	93517325	150	93517262	20	99	8.2
3	94392375	94392725	350	94392537	33	321	8.9
3	94879775	94880100	325	94879912	42	365	20.4
3	95045225	95045525	300	95045387	37	313	23.9
3	95247525	95247725	200	95247662	37	246	10.2
3	95303000	95303225	225	95303187	21	141	13.6
3	95315975	95316175	200	95316112	24	150	12.3
3	95519350	95519775	425	95519487	42	422	53.2
3	95738475	95738675	200	95738512	29	163	10.9
3	95748850	95749525	675	95749012	53	882	64.8
3	95760225	95760400	175	95760337	15	89	1.4
3	95787650	95787950	300	95787662	20	191	4.1
3	96189250	96189575	325	96189387	48	397	8.2
3	96363600	96363750	150	96363612	15	77	3.4
3	96413900	96414200	300	96414187	20	180	12.3
3	96429100	96429325	225	96429287	15	109	2.7
3	96587775	96588025	250	96587887	16	132	10.9
3	96643175	96643325	150	96643312	22	106	11.6
3	96647450	96647625	175	96647512	23	144	15
3	96657700	96657800	100	96657737	15	53	0.7
3	96662225	96662325	100	96662287	15	55	6.8
3	96662650	96662725	75	96662662	19	55	5.5
3	96663000	96663250	250	96663137	22	173	15.7
3	96678125	96678350	225	96678212	22	163	0
3	96761175	96761600	425	96761312	31	355	21.1
3	96765825	96766150	325	96765987	28	263	20.4
3	96786425	96786575	150	96786537	21	100	6.8
3	96819475	96819725	250	96819537	21	156	2.7
3	96893400	96893700	300	96893537	22	191	8.9
3	96918300	96918675	375	96918462	37	366	8.2
3	97244825	97245250	425	97245012	153	1474	18.4
3	97355250	97355500	250	97355362	18	141	0
3	97625475	97625925	450	97625762	49	462	13
3	97631800	97631975	175	97631887	16	104	9.5
3	97813375	97813575	200	97813437	15	102	3.4
3	97896600	97897025	425	97896787	47	517	25.2
3	98295200	98295400	200	98295312	17	113	0.7
3	98433950	98434200	250	98434062	22	161	13.6
3	99387225	99387550	325	99387387	29	267	17.7
3	100163650	100163975	325	100163812	28	237	3.4
3	100549700	100550075	375	100549887	53	486	5.5
3	100650750	100650950	200	100650862	17	105	1.4
3	100842875	100843125	250	100842987	16	122	4.1
3	101221300	101221650	350	101221462	47	422	12.3
3	101225325	101225450	125	101225337	15	64	2
3	101292400	101293325	925	101292637	73	1082	50.4
3	101447400	101447600	200	101447412	29	164	15
3	101474000	101474575	575	101474112	36	467	28.6
3	101493675	101494050	375	101493887	27	285	7.5
3	101579575	101579775	200	101579712	15	92	2.7
3	101699700	101699900	200	101699787	16	101	4.8
3	101729600	101729925	325	101729762	45	361	15.7
3	101762075	101762425	350	101762262	44	396	17.7
3	101965325	101965475	150	101965337	16	75	3.4
3	102025750	102026300	550	102026162	35	396	26.6
3	102182625	102182750	125	102182637	17	73	4.1
3	102184925	102185375	450	102185287	17	259	26.6
3	102212875	102213300	425	102213062	74	738	24.5
3	102232925	102233225	300	102233112	20	183	4.1
3	102293925	102294225	300	102294087	23	205	20.4
3	102296775	102296800	25	102296787	17	17	2
3	102319725	102320125	400	102319937	58	563	6.8
3	102332150	102332425	275	102332237	23	189	5.5
3	102501325	102501525	200	102501437	22	152	0
3	102734350	102734650	300	102734537	43	365	9.5
3	102847025	102847300	275	102847162	30	247	0
3	102977800	102978000	200	102977887	15	103	0
3	103215100	103215425	325	103215212	56	508	42.9
3	103236925	103237275	350	103237112	79	669	40.9
3	103256150	103256625	475	103256362	100	1103	44.3
3	103257250	103257600	350	103257437	27	289	21.1
3	103274450	103274525	75	103274487	17	48	5.5
3	103275400	103275750	350	103275587	19	204	25.9
3	103336775	103337375	600	103337062	113	1358	45.7
3	103364750	103364875	125	103364862	17	69	6.1
3	103508400	103508775	375	103508587	47	448	29.3
3	103607000	103607125	125	103607012	16	61	6.1
3	103669975	103670275	300	103670112	33	277	5.5
3	103812250	103812875	625	103812412	28	426	38.2
3	103900875	103901075	200	103900962	15	92	4.1
3	103916250	103916650	400	103916462	32	372	30
3	103979525	103979925	400	103979737	33	347	6.1
3	104043325	104043350	25	104043337	15	15	1.4
3	104417075	104417300	225	104417212	19	137	0
3	104830050	104830150	100	104830137	15	46	2
3	104943500	104943825	325	104943637	33	300	11.6
3	105555800	105556050	250	105555912	35	271	0
3	105578750	105578975	225	105578887	22	157	2.7
3	105940350	105940525	175	105940462	20	111	4.8
3	106676500	106676700	200	106676562	16	98	2.7
3	107189600	107189800	200	107189712	17	117	8.9
3	107334625	107334825	200	107334737	15	111	1.4
3	107478925	107479200	275	107479062	15	129	1.4
3	107961300	107961475	175	107961412	22	121	13
3	108093700	108093925	225	108093762	21	163	2.7
3	108355100	108355475	375	108355287	26	288	29.3
3	108561550	108561925	375	108561762	172	1578	47.7
3	108641600	108641825	225	108641737	17	115	2.7
3	108716575	108716850	275	108716737	19	165	0
3	108780950	108781350	400	108781137	58	579	12.3
3	108984950	108985275	325	108985112	25	247	13
3	109696475	109696700	225	109696612	15	115	4.8
3	111221575	111221775	200	111221637	15	101	4.1
3	111499300	111499650	350	111499537	51	448	4.8
3	112367675	112368025	350	112367887	36	346	5.5
3	115687100	115687400	300	115687237	20	194	10.2
3	116223950	116224150	200	116224037	16	111	0
3	116276175	116276300	125	116276187	16	68	6.1
3	116319275	116319600	325	116319412	49	439	13
3	116648225	116648500	275	116648362	30	249	4.8
3	116715225	116715450	225	116715287	23	164	0
3	116716775	116717000	225	116716862	19	134	0
3	116852450	116852675	225	116852512	26	188	9.5
3	116953400	116953725	325	116953562	54	450	17
3	116995850	116996075	225	116995962	19	126	0
3	117302825	117303075	250	117302937	19	139	2.7
3	118186825	118187050	225	118186912	17	132	5.5
3	118618425	118618700	275	118618537	22	179	2
3	119087200	119087525	325	119087362	46	406	23.2
3	119120100	119120375	275	119120212	32	268	6.1
3	119598150	119598425	275	119598262	23	192	0.7
3	119770475	119770800	325	119770637	28	238	2
3	119936150	119936450	300	119936287	49	400	0
3	120871550	120871825	275	120871637	15	135	6.1
3	121148250	121148500	250	121148362	38	288	12.3
3	121379600	121379800	200	121379662	16	108	8.2
3	121420200	121420525	325	121420337	36	333	14.3
3	121460250	121460450	200	121460362	21	133	4.8
3	121522475	121522850	375	121522662	38	346	19.8
3	121524300	121524500	200	121524412	17	113	6.1
3	121569275	121569475	200	121569387	24	156	9.5
3	121786275	121786600	325	121786437	55	482	25.9
3	121987075	121987600	525	121987312	66	714	5.5
3	122010075	122010250	175	122010112	16	100	7.5
3	122137300	122137875	575	122137587	423	4411	10.9
3	122382100	122382325	225	122382187	15	108	4.8
3	122426000	122426550	550	122426187	75	746	30.7
3	122428400	122428625	225	122428487	19	133	0
3	122450425	122450600	175	122450487	15	89	2.7
3	122557425	122557650	225	122557487	21	153	7.5
3	122621850	122622050	200	122621912	19	122	9.5
3	123288350	123288500	150	123288437	15	77	7.5
3	124598075	124598500	425	124598287	81	772	16.4
3	126079050	126079375	325	126079212	36	327	15
3	126435475	126435700	225	126435587	17	131	4.1
3	126440500	126440875	375	126440662	53	506	15
3	126441575	126441950	375	126441762	57	513	19.1
3	126736875	126737050	175	126736962	15	91	4.8
3	126990400	126990650	250	126990487	36	280	10.9
3	127116800	127117075	275	127116912	30	227	6.1
3	127292875	127293175	300	127293012	29	250	5.5
3	127451650	127452250	600	127452062	31	436	33.4
3	127455750	127456550	800	127455937	145	1726	74.3
3	127481075	127481400	325	127481212	25	225	8.2
3	127522325	127522575	250	127522412	19	153	5.5
3	127536575	127537075	500	127536787	43	567	6.8
3	127845900	127846100	200	127845962	15	93	3.4
3	127861000	127861300	300	127861162	31	252	8.2
3	127916800	127917000	200	127916912	17	108	1.4
3	129209250	129209400	150	129209362	16	87	0.7
3	129287900	129288125	225	129288012	21	149	6.1
3	129521350	129521750	400	129521562	42	425	27.3
3	129541575	129541875	300	129541712	15	154	13.6
3	129543850	129544275	425	129544037	70	703	18.4
3	129565700	129565975	275	129565812	39	318	19.1
3	129567225	129567450	225	129567287	17	134	5.5
3	130062750	130063050	300	130062912	24	197	0.7
3	130169650	130169975	325	130169787	15	152	5.5
3	130578850	130579050	200	130578937	16	98	5.5
3	130686850	130687050	200	130686912	15	101	4.1
3	131010275	131010575	300	131010412	26	200	4.1
3	131054300	131054375	75	131054312	18	48	4.8
3	131073800	131074175	375	131073937	49	483	18.4
3	131091400	131091725	325	131091562	46	378	3.4
3	131107125	131107325	200	131107287	20	134	13
3	131129350	131129550	200	131129462	16	109	0
3	131133475	131133675	200	131133562	23	154	15.7
3	131458550	131458825	275	131458662	22	186	0.7
3	131564875	131565200	325	131565012	65	557	18.4
3	131738825	131739100	275	131738912	24	200	15
3	133126250	133126575	325	133126412	44	366	16.4
3	133444000	133444175	175	133444037	16	89	8.9
3	133450850	133451025	175	133450937	15	83	2.7
3	133456025	133456425	400	133456187	29	334	19.8
3	133461875	133462425	550	133462062	53	667	9.5
3	133469625	133470350	725	133470062	99	1220	17
3	133471350	133471800	450	133471537	52	569	34.1
3	134176475	134176850	375	134176662	32	308	0
3	134352975	134353175	200	134353062	15	102	0
3	135270050	135270400	350	135270212	30	288	4.8
3	135403875	135404125	250	135403987	18	130	6.8
3	135483650	135484375	725	135483837	50	839	34.8
3	135484825	135485025	200	135484887	28	177	13.6
3	136053100	136053500	400	136053312	24	282	8.9
3	136187475	136187675	200	136187537	16	112	9.5
3	136547475	136547825	350	136547662	32	316	11.6
3	137484900	137485225	325	137485087	41	365	20.4
3	137579975	137580350	375	137580162	30	298	17.7
3	137674800	137675175	375	137674987	31	299	21.1
3	137717275	137717825	550	137717612	120	1342	54.5
3	137721725	137722200	475	137722012	32	400	13
3	137770575	137771250	675	137770737	133	1299	27.3
3	137803075	137803300	225	137803187	20	130	3.4
3	137825700	137825975	275	137825837	18	132	3.4
3	137892150	137892200	50	137892187	20	38	4.1
3	137914750	137914900	150	137914787	32	176	21.8
3	137979150	137979575	425	137979387	96	942	13.6
3	138605800	138606125	325	138605887	19	222	31.4
3	138613300	138613650	350	138613462	26	239	5.5
3	138629700	138630125	425	138629887	74	761	0
3	138713800	138714125	325	138713937	43	382	12.3
3	138752525	138753150	625	138752637	15	270	13.6
3	138763800	138764100	300	138763912	26	221	6.8
3	138928200	138928425	225	138928337	29	200	9.5
3	139106825	139107075	250	139106912	22	177	9.5
3	139535675	139535925	250	139535812	23	184	0.7
3	140654450	140654675	225	140654587	16	114	0
3	141532550	141532925	375	141532737	33	327	36.1
3	141730325	141730575	250	141730412	22	169	0
3	141786500	141786950	450	141786687	53	550	8.2
3	142286175	142286500	325	142286337	35	305	4.8
3	142431300	142431450	150	142431312	21	88	6.8
3	142587650	142587975	325	142587787	24	223	0
3	142697750	142697975	225	142697837	15	113	2
3	142824375	142824700	325	142824537	35	319	2
3	143095775	143096000	225	143095862	18	133	2.7
3	144269750	144270000	250	144269837	22	161	1.4
3	144348425	144348875	450	144348587	24	264	21.1
3	144350200	144350850	650	144350612	114	1321	49.1
3	144359225	144359600	375	144359387	28	289	0.7
3	144548150	144548425	275	144548237	19	164	8.2
3	144955225	144955575	350	144955412	63	550	0
3	145401700	145401975	275	145401837	24	182	3.4
3	145588850	145589175	325	145588987	32	296	21.1
3	145810775	145810975	200	145810962	16	100	2.7
3	146317350	146317675	325	146317512	21	190	5.5
3	146406625	146406975	350	146406787	49	446	10.9
3	146450600	146450800	200	146450712	15	99	4.8
3	146630825	146631225	400	146631037	118	1029	21.8
3	146706375	146706575	200	146706512	24	162	8.9
3	147119050	147119400	350	147119212	21	200	14.3
3	147580875	147581275	400	147581037	20	230	4.8
3	147864700	147865025	325	147864837	40	350	8.2
3	147901000	147901425	425	147901237	117	1109	2.7
3	147901700	147901850	150	147901762	17	84	4.1
3	148280750	148281300	550	148281162	27	334	46.4
3	148923725	148924025	300	148923837	60	548	29.3
3	149144375	149144575	200	149144412	15	95	6.1
3	149155325	149155575	250	149155437	16	124	2.7
3	149156600	149156825	225	149156812	22	136	11.6
3	149157175	149157925	750	149157387	72	997	24.5
3	149189425	149189875	450	149189612	37	409	1.4
3	149343250	149343500	250	149343387	30	223	5.5
3	149421750	149422100	350	149421912	56	491	11.6
3	149431275	149431525	250	149431412	22	149	0
3	152102725	152102950	225	152102812	15	113	8.9
3	152279550	152279775	225	152279637	20	141	3.4
3	152343675	152343875	200	152343762	16	103	4.1
3	152603600	152603875	275	152603737	28	214	5.5
3	153519375	153519625	250	153519512	17	132	0
3	153613200	153613650	450	153613387	125	1208	17
3	153743775	153743900	125	153743837	18	79	8.2
3	153973900	153974175	275	153974062	27	211	5.5
3	154147350	154147725	375	154147587	24	236	2.7
3	154316875	154317225	350	154317037	50	423	13.6
3	154482950	154483500	550	154483337	102	1013	28.6
3	154712350	154712625	275	154712487	31	247	6.1
3	155872925	155873175	250	155873037	18	128	0
3	157183650	157183875	225	157183787	26	191	10.9
3	157226275	157226450	175	157226337	16	90	0
3	157256300	157256725	425	157256537	83	912	25.9
3	157257050	157257500	450	157257287	94	942	17
3	157967000	157967175	175	157967062	19	118	15
3	158464700	158464975	275	158464812	18	154	0
3	159550250	159550600	350	159550462	47	421	2
2	3337450	3337775	325	3337587	39	343	10.9
2	4030725	4030875	150	4030837	16	84	3.4
2	4139100	4139425	325	4139262	41	353	7.5
2	4338025	4338250	225	4338087	15	109	0
2	4456500	4456800	300	4456612	24	217	15.7
2	4836175	4836350	175	4836187	17	96	8.2
2	4930025	4930200	175	4930112	23	150	19.8
2	4961650	4961850	200	4961787	22	140	6.8
2	4992725	4992925	200	4992787	16	110	8.9
2	4993375	4993700	325	4993412	18	181	11.6
2	4995300	4995675	375	4995487	35	344	8.2
2	5137225	5137625	400	5137437	51	497	0
2	5274375	5274650	275	5274487	17	143	10.9
2	5502000	5502175	175	5502062	16	92	6.8
2	5593250	5593475	225	5593337	17	122	6.8
2	5652725	5652975	250	5652837	17	133	0
2	5653325	5653475	150	5653337	17	86	8.9
2	5964100	5964375	275	5964237	31	251	8.2
2	5972775	5973000	225	5972887	26	188	2
2	5989400	5989625	225	5989537	18	138	2
2	6291500	6291900	400	6291712	71	648	7.5
2	6376625	6376875	250	6376712	24	187	5.5
2	6511925	6512225	300	6512062	40	339	6.8
2	8416200	8416750	550	8416512	64	730	22.5
2	9341450	9341650	200	9341562	21	143	13
2	9360950	9361275	325	9361087	27	245	4.1
2	9668075	9668500	425	9668312	24	278	16.4
2	10021850	10022075	225	10021937	22	152	10.9
2	10180875	10181025	150	10180887	17	79	6.8
2	10236275	10236575	300	10236437	28	238	9.5
2	10252125	10252450	325	10252237	29	278	9.5
2	10253125	10253400	275	10253262	22	165	10.9
2	10308600	10309000	400	10308787	65	652	6.1
2	11359275	11359525	250	11359362	23	175	2.7
2	11488900	11489225	325	11489037	24	220	21.1
2	13288425	13288750	325	13288612	63	537	5.5
2	13615275	13615725	450	13615537	26	322	10.2
2	13685775	13686075	300	13685837	15	143	15
2	13797475	13797725	250	13797587	25	184	15
2	13874150	13874525	375	13874337	29	292	10.9
2	15843875	15844125	250	15844012	23	175	4.1
2	17521300	17521600	300	17521462	22	181	13.6
2	17770450	17770775	325	17770612	38	341	3.4
2	17850975	17851375	400	17851212	74	726	17.7
2	17860825	17861150	325	17860987	39	352	25.2
2	17889125	17889350	225	17889212	18	141	10.2
2	17906675	17907275	600	17906962	175	2096	40.9
2	17967300	17967500	200	17967487	24	139	10.9
2	18261275	18261600	325	18261437	40	354	11.6
2	18331025	18331275	250	18331162	28	212	13.6
2	18510125	18510300	175	18510187	26	140	13
2	18535725	18535975	250	18535812	24	194	7.5
2	18591600	18592125	525	18591712	19	265	27.3
2	18604650	18605000	350	18604837	63	560	9.5
2	18935875	18936125	250	18935987	18	145	5.5
2	19078600	19078825	225	19078712	15	115	10.2
2	19219275	19219425	150	19219312	15	84	7.5
2	19298750	19299075	325	19298912	20	178	10.9
2	19310475	19310900	425	19310687	32	373	2.7
2	19379725	19380050	325	19379887	44	368	1.4
2	20126975	20127375	400	20127187	87	785	15
2	20200775	20200900	125	20200862	18	76	6.1
2	20242225	20242475	250	20242337	20	160	3.4
2	20292375	20292575	200	20292487	16	108	2
2	20311925	20312225	300	20312062	25	203	6.8
2	20363175	20363400	225	20363287	21	155	8.2
2	20403875	20404200	325	20404037	27	242	7.5
2	20414000	20414300	300	20414137	37	323	13.6
2	20466875	20467125	250	20467012	36	301	19.1
2	20511950	20512300	350	20512112	46	411	16.4
2	20512775	20513150	375	20512962	60	538	11.6
2	20570775	20571350	575	20571062	68	910	28.6
2	20572350	20573450	1100	20572962	73	1709	40.9
2	20583250	20583525	275	20583512	18	135	17
2	20587100	20587525	425	20587287	15	201	6.1
2	20589425	20589525	100	20589487	18	63	7.5
2	20590975	20591275	300	20591137	22	182	0
2	20609975	20610300	325	20610137	38	335	16.4
2	20621500	20621750	250	20621662	19	135	7.5
2	20640550	20640850	300	20640637	45	377	7.5
2	20641775	20642300	525	20641912	65	682	41.6
2	20655725	20655950	225	20655812	35	260	17
2	20847975	20848200	225	20848087	19	140	0
2	20852075	20852400	325	20852162	26	272	12.3
2	20861825	20862075	250	20861962	31	232	10.2
2	21310425	21311075	650	21310737	76	1093	34.8
2	21881725	21882075	350	21881912	53	473	14.3
2	21894625	21894800	175	21894712	19	109	6.1
2	21962800	21963075	275	21962987	30	238	5.5
2	22471650	22472075	425	22471837	56	572	8.9
2	24263975	24264150	175	24264062	17	95	4.1
2	24265250	24265600	350	24265387	27	281	5.5
2	24734250	24734525	275	24734362	50	415	21.1
2	24809875	24810150	275	24810012	22	167	7.5
2	25002525	25002975	450	25002712	105	988	43.6
2	25007800	25008000	200	25007912	23	149	12.3
2	25877375	25877775	400	25877587	109	1038	15.7
2	25901425	25901750	325	25901587	25	235	10.9
2	26120925	26121125	200	26121012	22	147	6.8
2	26165150	26165325	175	26165287	18	117	14.3
2	26264850	26265225	375	26265012	44	437	3.4
2	26326000	26326300	300	26326162	111	951	40.9
2	26433175	26433375	200	26433287	27	191	22.5
2	26771250	26771425	175	26771337	20	118	11.6
2	26786400	26786575	175	26786412	25	134	12.3
2	27200025	27200200	175	27200087	17	105	13
2	27338325	27338450	125	27338437	15	64	1.4
2	27466800	27467150	350	27466962	80	706	19.8
2	27506250	27506650	400	27506462	60	559	8.9
2	28288275	28288575	300	28288412	17	147	17.7
2	28328400	28328650	250	28328512	25	179	10.9
2	28405050	28405125	75	28405062	18	46	3.4
2	28429450	28429700	250	28429462	21	151	8.2
2	28729775	28730075	300	28729962	44	374	33.4
2	28887975	28888150	175	28888037	17	105	9.5
2	28920050	28920375	325	28920212	33	292	2.7
2	28922850	28923050	200	28922962	17	119	10.2
2	28942975	28943375	400	28943162	157	1400	36.8
2	28974025	28974375	350	28974187	31	278	10.9
2	29322900	29323375	475	29323162	59	625	13.6
2	29374225	29374425	200	29374312	22	141	10.9
2	29451450	29451700	250	29451562	47	402	31.4
2	29453550	29453925	375	29453737	85	722	4.8
2	29491550	29491850	300	29491712	28	239	19.1
2	29513625	29513825	200	29513712	33	225	20.4
2	29530275	29530625	350	29530437	53	499	19.1
2	29551550	29551850	300	29551637	28	254	6.1
2	29642400	29642750	350	29642587	124	1128	49.1
2	29657525	29657950	425	29657737	117	1214	35.4
2	29678425	29678600	175	29678537	20	117	6.8
2	29702075	29702250	175	29702162	15	83	1.4
2	29864550	29864850	300	29864687	31	245	8.2
2	29883850	29884225	375	29884037	66	620	25.9
2	29941675	29942000	325	29941837	34	302	14.3
2	29957175	29957400	225	29957362	34	221	15
2	30157325	30157675	350	30157487	47	421	0
2	30263825	30264050	225	30263887	17	122	10.9
2	30293850	30294050	200	30293912	15	111	10.9
2	30296850	30297075	225	30297012	24	155	4.8
2	30423525	30423750	225	30423687	21	149	13
2	30559700	30560075	375	30559887	55	521	17.7
2	30565975	30566200	225	30566087	17	135	15
2	30579400	30579650	250	30579462	17	125	15
2	30582075	30582450	375	30582287	149	1294	25.2
2	30600400	30600550	150	30600462	26	143	6.8
2	30601225	30601650	425	30601462	48	527	45
2	30628400	30628575	175	30628462	17	103	2
2	30638400	30638675	275	30638537	46	357	13
2	30706850	30707175	325	30707012	78	667	15
2	30774025	30774350	325	30774187	40	331	8.9
2	30864975	30865175	200	30865062	17	118	6.1
2	30882250	30882650	400	30882437	25	307	4.8
2	30890625	30891425	800	30890812	52	646	54.5
2	30913200	30913600	400	30913362	32	339	10.2
2	30949375	30949675	300	30949512	36	281	12.3
2	30963975	30964100	125	30964037	15	62	4.1
2	30985450	30986025	575	30985962	58	963	51.1
2	31324675	31324950	275	31324762	28	224	8.9
2	31367275	31367650	375	31367512	42	424	13.6
2	31393900	31394150	250	31393987	27	213	16.4
2	31563750	31564075	325	31563887	47	410	8.2
2	31571450	31571625	175	31571537	16	99	9.5
2	31581725	31581900	175	31581762	19	118	7.5
2	31601375	31601650	275	31601512	25	198	8.9
2	31702825	31703125	300	31702937	19	174	7.5
2	31962650	31962950	300	31962787	17	155	9.5
2	31979350	31979600	250	31979462	20	156	1.4
2	31984675	31985000	325	31984837	24	222	10.2
2	31996500	31996875	375	31996512	20	277	23.9
2	32019225	32019425	200	32019262	18	113	8.2
2	32062600	32062900	300	32062737	25	195	13.6
2	32225675	32225950	275	32225812	23	163	2
2	32358550	32358875	325	32358737	57	475	30
2	32511500	32511700	200	32511562	16	104	4.8
2	32682825	32683150	325	32682962	36	307	2.7
2	32730275	32730650	375	32730512	16	168	5.5
2	32896875	32897100	225	32897037	16	121	2
2	33111450	33111600	150	33111487	16	78	4.8
2	33248700	33248925	225	33248762	20	140	8.2
2	33261500	33262175	675	33261662	107	1130	30
2	33282975	33283250	275	33283137	24	183	6.1
2	33300525	33300850	325	33300662	48	400	13
2	33402575	33402975	400	33402762	61	589	10.9
2	33438500	33438700	200	33438587	17	117	0.7
2	33459300	33459850	550	33459612	61	714	13.6
2	34053525	34053775	250	34053662	19	146	3.4
2	34071525	34072075	550	34071762	139	1422	49.1
2	34185775	34186100	325	34185912	21	200	5.5
2	34221475	34221925	450	34221687	101	1011	13
2	34392350	34392700	350	34392537	33	313	6.1
2	34768050	34768250	200	34768162	29	195	6.1
2	34821075	34821225	150	34821087	17	84	8.9
2	35072200	35072475	275	35072337	19	154	2
2	35437325	35437525	200	35437487	26	150	8.2
2	35588575	35588825	250	35588637	17	135	7.5
2	35663050	35663275	225	35663162	22	157	13
2	35667900	35668100	200	35667912	19	128	14.3
2	35899225	35899425	200	35899362	17	118	4.8
2	36020750	36021000	250	36020912	17	131	7.5
2	36025425	36025700	275	36025562	20	167	6.1
2	36044200	36044500	300	36044337	29	245	8.9
2	37413725	37413925	200	37413837	15	92	0
2	37582775	37582925	150	37582812	18	88	8.9
2	37589275	37589625	350	37589462	119	1050	23.2
2	38004375	38004650	275	38004512	23	181	5.5
2	38005900	38006175	275	38006062	26	213	9.5
2	38369800	38370150	350	38369987	32	301	8.2
2	38377800	38378125	325	38377987	65	542	21.8
2	38490725	38491125	400	38490987	69	667	23.9
2	38612575	38612825	250	38612712	21	163	0
2	38639500	38639800	300	38639612	27	236	4.1
2	38747125	38747475	350	38747287	31	293	15.7
2	38766100	38766275	175	38766212	22	129	14.3
2	39439975	39440175	200	39440087	18	116	2.7
2	40732850	40733325	475	40733062	115	1267	10.9
2	43187800	43188300	500	43188012	86	936	13
2	43544775	43545100	325	43544912	22	197	8.9
2	44347050	44347900	850	44347487	149	2338	31.4
2	44360100	44360600	500	44360337	57	689	13
2	44651825	44652025	200	44651912	15	106	0
2	44846600	44846925	325	44846737	21	204	7.5
2	44859625	44859975	350	44859812	48	428	5.5
2	44910450	44910750	300	44910637	43	354	6.1
2	44926625	44926825	200	44926762	15	102	0
2	44939175	44939450	275	44939287	24	186	8.9
2	44980325	44980850	525	44980662	56	592	8.9
2	45027250	45027450	200	45027312	16	111	8.2
2	45047375	45047700	325	45047587	37	354	20.4
2	45378500	45378825	325	45378687	26	225	10.9
2	45558275	45558900	625	45558462	165	1729	32.7
2	46552600	46552850	250	46552737	17	133	4.8
2	49193675	49194000	325	49193812	55	463	2
2	49270950	49271250	300	49271137	30	260	8.2
2	49631850	49632025	175	49631912	15	84	8.2
2	49700025	49700225	200	49700162	15	95	3.4
2	50009050	50009300	250	50009212	16	125	2.7
2	50087125	50087675	550	50087437	65	899	10.9
2	50802300	50802625	325	50802462	40	325	0
2	50860675	50861100	425	50860887	98	946	21.8
2	50871825	50872225	400	50871987	91	884	23.9
2	50907150	50907450	300	50907312	25	218	19.1
2	50910050	50910150	100	50910087	21	77	5.5
2	51575625	51575950	325	51575862	19	208	12.3
2	51835375	51835650	275	51835512	25	190	12.3
2	51893300	51894775	1475	51894237	331	4304	85.9
2	51912100	51912300	200	51912212	17	115	7.5
2	52379700	52379850	150	52379762	15	86	4.1
2	52522400	52522600	200	52522487	17	113	0
2	52745675	52745875	200	52745712	16	115	6.8
2	52780625	52781125	500	52780862	16	253	5.5
2	52781425	52781550	125	52781537	15	66	7.5
2	54752725	54753025	300	54752862	24	214	0
2	55025475	55025725	250	55025562	42	322	0
2	57071775	57072125	350	57071962	41	364	7.5
2	57193800	57194100	300	57193962	26	206	8.9
2	57428775	57428975	200	57428887	20	135	0
2	57643675	57644075	400	57643862	77	723	15
2	58420100	58420525	425	58420337	51	559	17.7
2	58441225	58442200	975	58441787	118	1548	66.1
2	58443475	58443750	275	58443587	33	264	13.6
2	58475375	58475550	175	58475487	15	84	1.4
2	58695300	58695500	200	58695362	17	116	0
2	58869525	58869575	50	58869537	15	30	2.7
2	59186375	59186650	275	59186512	15	129	4.8
2	59403875	59404050	175	59404037	19	103	2
2	59423525	59423650	125	59423537	15	57	1.4
2	59424475	59424625	150	59424487	17	83	6.1
2	59434450	59435100	650	59434987	17	316	32.7
2	59449275	59449625	350	59449437	28	254	19.1
2	59851400	59851775	375	59851637	60	571	15.7
2	59884300	59884475	175	59884387	16	100	8.2
2	59885400	59885975	575	59885787	41	435	10.9
2	59943700	59943975	275	59943887	17	148	6.8
2	59997700	59998050	350	59997862	41	395	11.6
2	60207900	60208100	200	60207962	15	104	1.4
2	60212025	60212275	250	60212162	20	151	8.9
2	60530975	60531225	250	60531087	26	196	15
2	61047875	61048350	475	61047937	16	200	21.1
2	61066150	61066425	275	61066312	29	235	4.8
2	61203900	61204375	475	61204162	111	1066	16.4
2	61818950	61819275	325	61819087	24	236	11.6
2	61886950	61887150	200	61887012	16	106	1.4
2	63728725	63729050	325	63728912	21	202	5.5
2	64392975	64393150	175	64393037	15	83	0.7
2	64838425	64838700	275	64838587	41	341	6.1
2	65222050	65222775	725	65222287	102	1368	21.8
2	65345725	65345875	150	65345737	15	69	5.5
2	65353650	65353875	225	65353762	16	113	4.1
2	65642400	65642900	500	65642587	49	623	13.6
2	65649425	65649825	400	65649637	61	609	4.8
2	65893550	65893875	325	65893712	39	316	0
2	66240925	66241325	400	66241187	37	392	15
2	67334625	67334825	200	67334712	16	111	1.4
2	67377450	67377750	300	67377587	35	282	5.5
2	67391300	67391525	225	67391412	15	107	0
2	67580425	67580675	250	67580537	16	135	0
2	68098800	68099125	325	68098937	37	300	5.5
2	68185450	68185750	300	68185587	23	191	2
2	68186850	68187200	350	68187037	84	717	26.6
2	68619875	68620275	400	68620062	69	642	5.5
2	68689625	68690025	400	68689812	44	434	0
2	68690550	68690850	300	68690687	23	191	0
2	68768225	68768375	150	68768237	17	85	4.1
2	68848675	68849150	475	68848887	126	1268	5.5
2	69022875	69023200	325	69023062	30	270	5.5
2	69345050	69345275	225	69345187	17	119	2
2	69386800	69387050	250	69386962	15	110	3.4
2	69393325	69393675	350	69393487	50	455	32
2	69553625	69553850	225	69553687	21	156	13.6
2	69928500	69928825	325	69928662	25	223	6.8
2	69950025	69950300	275	69950187	17	129	4.1
2	70079450	70080050	600	70079712	99	1376	20.4
2	70351525	70351700	175	70351612	16	90	6.8
2	70360400	70360650	250	70360562	23	187	15.7
2	70606950	70607175	225	70606987	29	215	8.9
2	70631625	70631825	200	70631687	15	99	5.5
2	70752825	70753100	275	70752987	21	165	6.8
2	70989750	70990125	375	70989937	80	704	8.2
2	71012250	71012475	225	71012362	27	188	8.9
2	71021900	71022100	200	71022012	15	97	3.4
2	71044000	71044450	450	71044187	35	394	25.9
2	71197300	71197550	250	71197437	22	173	0
2	71425950	71426125	175	71426037	15	86	9.5
2	71450950	71451250	300	71451112	33	263	27.3
2	71453200	71453550	350	71453487	30	308	19.1
2	71456625	71457250	625	71456912	21	402	46.4
2	71505175	71505500	325	71505312	30	281	18.4
2	71519850	71520275	425	71520012	41	424	22.5
2	71526275	71526625	350	71526462	39	329	17.7
2	71545925	71546400	475	71546162	69	746	23.2
2	71667550	71667600	50	71667587	28	53	4.8
2	71819700	71820000	300	71819862	31	259	12.3
2	72053450	72053725	275	72053562	18	153	8.9
2	72276675	72276725	50	72276687	21	40	4.1
2	72316550	72316850	300	72316662	50	428	10.9
2	72613500	72613775	275	72613662	16	134	4.1
2	72786325	72786725	400	72786537	44	447	18.4
2	72842500	72842850	350	72842612	18	189	9.5
2	72886800	72887075	275	72886912	25	191	19.8
2	73076975	73077400	425	73077212	61	623	10.9
2	73573850	73574100	250	73573987	19	153	17.7
2	73874225	73874475	250	73874412	16	127	0
2	73924250	73924675	425	73924462	45	515	27.3
2	73954875	73955075	200	73954962	16	101	4.1
2	74261775	74261900	125	74261837	16	68	4.1
2	74473375	74473650	275	74473512	25	212	7.5
2	74479825	74480150	325	74479962	23	214	6.8
2	74482375	74482725	350	74482637	19	207	21.8
2	74531975	74532175	200	74532037	22	130	10.2
2	74578800	74579100	300	74578937	25	214	4.8
2	74694100	74694450	350	74694262	64	560	0
2	74830250	74830450	200	74830362	18	118	4.8
2	74848975	74849250	275	74849062	32	275	12.3
2	75013225	75013425	200	75013362	16	100	4.8
2	75047125	75047500	375	75047312	30	311	9.5
2	75074325	75074475	150	75074362	15	77	0.7
2	75434675	75434900	225	75434787	16	120	8.2
2	75483750	75484075	325	75483912	18	170	19.1
2	75532975	75533200	225	75533062	17	130	4.8
2	75569100	75569525	425	75569287	27	339	10.9
2	75587150	75587450	300	75587262	26	241	19.1
2	75670800	75671050	250	75670887	21	174	0
2	75674850	75675225	375	75675037	89	812	34.1
2	75831250	75831475	225	75831312	21	142	3.4
2	75927525	75927775	250	75927637	16	129	8.2
2	76201050	76201350	300	76201212	28	242	2.7
2	76242875	76243100	225	76243012	30	215	13.6
2	76476550	76476775	225	76476612	18	130	0
2	76605975	76606425	450	76606237	72	790	14.3
2	76618650	76619000	350	76618812	44	396	0
2	77134400	77134575	175	77134462	15	94	4.8
2	77138700	77139100	400	77138837	51	492	4.1
2	77218150	77218425	275	77218312	32	240	14.3
2	77307400	77307650	250	77307462	39	294	13
2	77387400	77388050	650	77387562	27	413	11.6
2	77553375	77553675	300	77553512	36	293	0
2	77554200	77554450	250	77554262	22	183	15
2	78110250	78110450	200	78110387	17	110	0.7
2	79179875	79180225	350	79179987	17	193	0.7
2	79258875	79259150	275	79258987	17	135	5.5
2	79367550	79367725	175	79367612	15	92	2
2	79368300	79368500	200	79368362	23	145	6.8
2	79927475	79927825	350	79927637	34	341	17
2	79985025	79985350	325	79985187	32	282	5.5
2	80439950	80440175	225	80440037	27	191	4.8
2	81649550	81650050	500	81649862	66	735	10.9
2	81869900	81870375	475	81870087	27	346	5.5
2	82648200	82648400	200	82648337	15	92	3.4
2	83445250	83445350	100	83445262	15	49	4.1
2	83493775	83494000	225	83493837	37	275	6.8
2	83511075	83511225	150	83511187	24	105	10.9
2	83519275	83519475	200	83519412	24	162	8.2
2	84319775	84320025	250	84319887	21	167	7.5
2	84380225	84380550	325	84380412	26	232	0.7
2	84386550	84386925	375	84386737	56	482	3.4
2	84528100	84528200	100	84528162	15	55	4.8
2	84563075	84563475	400	84563287	48	468	0.7
2	84637975	84638350	375	84638162	82	707	16.4
2	84639175	84639425	250	84639237	39	291	15
2	85053250	85053450	200	85053337	16	103	6.8
2	87282025	87282325	300	87282187	25	206	10.2
2	87316575	87316825	250	87316737	20	155	0
2	89656575	89656900	325	89656712	42	368	0
2	90275775	90276025	250	90275837	37	274	20.4
2	90381425	90381625	200	90381512	17	109	10.2
2	90509400	90509750	350	90509587	60	526	3.4
2	91003400	91003625	225	91003587	23	147	15.7
2	91450750	91450925	175	91450862	18	107	11.6
2	91507375	91507575	200	91507537	21	136	10.2
2	91530800	91530950	150	91530937	22	100	8.9
2	91772350	91772550	200	91772412	24	151	15.7
2	91944975	91945150	175	91944987	33	202	19.8
2	92003600	92003725	125	92003662	15	67	5.5
2	92131825	92131900	75	92131837	16	45	4.1
2	92388500	92388725	225	92388587	22	162	13.6
2	92606800	92606950	150	92606812	19	93	1.4
2	92655250	92655425	175	92655337	15	95	5.5
2	92991525	92992200	675	92992137	22	316	25.2
2	93586250	93586550	300	93586387	75	616	25.2
2	93650125	93650350	225	93650262	30	210	19.1
2	93664150	93664425	275	93664287	44	359	14.3
2	93728500	93729075	575	93728812	63	907	30
2	94046350	94046450	100	94046362	17	60	6.1
2	94391400	94391625	225	94391512	16	109	2.7
2	94565300	94565600	300	94565437	22	201	0.7
2	96115925	96116125	200	96116012	15	100	4.8
2	96119400	96119575	175	96119512	19	103	6.1
2	96576300	96576575	275	96576412	18	156	0.7
2	99359025	99359400	375	99359212	67	591	0.7
2	100200675	100201025	350	100200837	30	292	8.9
2	101467000	101467300	300	101467137	30	239	17.7
2	101523725	101524125	400	101523937	79	743	10.2
2	101556000	101556425	425	101556337	17	236	27.3
2	101849425	101849625	200	101849512	17	113	10.2
2	101911150	101911450	300	101911287	16	147	0
2	102204875	102205225	350	102205037	47	406	5.5
2	102458525	102458750	225	102458687	17	122	6.8
2	102616475	102616650	175	102616562	15	87	0
2	102760425	102760625	200	102760437	17	112	6.8
2	102987750	102988100	350	102987912	55	468	5.5
2	103111525	103111850	325	103111687	33	270	5.5
2	103148900	103149100	200	103149037	17	115	0
2	103161600	103161875	275	103161712	18	151	8.2
2	103592900	103593225	325	103593037	36	305	23.2
2	103692500	103692575	75	103692512	19	46	4.1
2	103793800	103794175	375	103793962	113	980	19.8
2	104020875	104021275	400	104021087	83	754	13.6
2	104172525	104173125	600	104172687	42	475	20.4
2	104543650	104543850	200	104543687	20	135	17.7
2	104618875	104619150	275	104619012	83	655	25.9
2	104627050	104627325	275	104627212	22	184	4.8
2	104656600	104657000	400	104656762	61	572	18.4
2	105062250	105062525	275	105062362	45	344	11.6
2	105170975	105171350	375	105171162	82	713	8.2
2	105209325	105209550	225	105209412	18	130	0
2	105277225	105277450	225	105277312	18	119	3.4
2	105411975	105412325	350	105412162	48	406	17
2	105417225	105417600	375	105417412	77	709	32
2	105476025	105476400	375	105476162	20	230	17
2	105478150	105478850	700	105478362	71	871	55.2
2	105491925	105492725	800	105492162	114	1368	54.5
2	105528675	105528900	225	105528762	19	140	4.1
2	106266525	106266925	400	106266787	15	165	4.1
2	106299275	106299525	250	106299362	15	121	0
2	106362325	106362800	475	106362537	76	783	0
2	106363575	106363775	200	106363687	19	119	6.8
2	106424525	106424875	350	106424712	27	254	6.1
2	106478375	106478700	325	106478512	57	494	13.6
2	106521225	106521450	225	106521312	16	117	0
2	106551675	106552175	500	106551887	92	880	13
2	106623400	106623675	275	106623512	19	150	0
2	106657450	106657775	325	106657587	62	526	3.4
2	109082175	109082500	325	109082312	25	219	18.4
2	109112275	109112600	325	109112412	17	164	0
2	109175775	109176075	300	109175912	31	261	5.5
2	109379825	109380300	475	109380012	24	343	10.9
2	109661675	109662025	350	109661862	46	396	0
2	109714125	109714450	325	109714262	27	250	17
2	109742950	109743275	325	109743112	71	613	27.9
2	109744000	109744450	450	109744162	63	643	0
2	112477825	112477925	100	112477837	18	56	4.8
2	112732650	112733250	600	112732787	43	508	5.5
2	112998450	112998650	200	112998537	16	110	0.7
2	113550150	113550325	175	113550287	23	136	14.3
2	113608050	113608300	250	113608187	17	138	8.2
2	113751525	113751950	425	113751762	44	474	3.4
2	113869475	113869900	425	113869737	24	298	15
2	115160900	115161275	375	115161062	70	627	23.2
2	115211750	115212050	300	115211862	17	159	4.8
2	115370200	115370500	300	115370337	28	243	1.4
2	115406750	115407025	275	115406887	25	191	2
2	115414750	115415950	1200	115415087	125	1757	67.5
2	115561425	115561675	250	115561537	26	196	5.5
2	115671625	115671850	225	115671737	18	112	3.4
2	115751275	115751925	650	115751687	119	1267	8.9
2	116668500	116668925	425	116668662	25	343	15
2	116671400	116671650	250	116671462	16	130	4.8
2	116710350	116710625	275	116710512	30	244	17.7
2	116811300	116811700	400	116811512	64	606	42.3
2	116885875	116886000	125	116885937	26	115	12.3
2	117028375	117028725	350	117028562	61	536	6.8
2	118180600	118180825	225	118180687	18	123	4.1
2	118236200	118236250	50	118236212	15	28	2
2	118241200	118241300	100	118241212	15	56	5.5
2	118279200	118279475	275	118279312	26	225	7.5
2	118311600	118311875	275	118311737	23	192	14.3
2	118365650	118365850	200	118365712	17	113	7.5
2	118931775	118932025	250	118931937	21	153	7.5
2	119013950	119014225	275	119014062	38	303	19.8
2	119047150	119047425	275	119047337	25	190	6.8
2	119154675	119154900	225	119154812	21	145	8.9
2	119155275	119155775	500	119155462	123	1274	6.1
2	119177900	119178225	325	119178062	50	429	6.1
2	119399175	119399475	300	119399287	21	192	2
2	119481550	119481850	300	119481712	24	217	17
2	119494250	119494350	100	119494337	18	62	7.5
2	119495375	119495675	300	119495537	34	279	10.9
2	119547075	119547375	300	119547212	30	268	18.4
2	119548825	119549225	400	119549012	202	1777	12.3
2	119935450	119935750	300	119935637	36	319	0
2	120205500	120205875	375	120205687	36	419	15
2	120961900	120962350	450	120962112	100	998	12.3
2	121168900	121169200	300	121169087	23	199	0
2	121334225	121334800	575	121334662	27	400	20.4
2	121456350	121456700	350	121456537	26	252	10.9
2	121517750	121518100	350	121517937	45	410	14.3
2	122003050	122003300	250	122003112	17	145	0.7
2	122043425	122043750	325	122043587	51	449	19.1
2	122061525	122062150	625	122061712	130	1349	48.4
2	123077050	123077275	225	123077162	23	171	4.1
2	123556700	123557000	300	123556837	31	255	0
2	123837050	123837375	325	123837187	75	633	18.4
2	124096200	124096450	250	124096262	16	126	0.7
2	124331975	124332375	400	124332162	103	944	10.2
2	124811125	124811500	375	124811337	66	590	10.9
2	124816750	124817025	275	124816862	22	185	0.7
2	124827375	124827450	75	124827387	15	39	4.1
2	124851475	124851700	225	124851612	21	148	2.7
2	126585775	126586025	250	126585862	29	201	15.7
2	126689675	126689975	300	126689812	27	228	5.5
2	126874100	126874325	225	126874237	17	133	3.4
2	127176075	127176200	125	127176187	18	67	5.5
2	127296650	127297050	400	127296812	32	318	0.7
2	127406150	127406450	300	127406312	22	199	5.5
2	127530675	127531275	600	127531087	82	865	24.5
2	127903325	127903675	350	127903487	107	945	21.8
2	127931950	127932300	350	127932112	23	252	28.6
2	127932800	127932975	175	127932887	15	84	6.8
2	127957100	127957125	25	127957112	23	23	2.7
2	127964325	127964600	275	127964412	41	340	11.6
2	128065200	128065425	225	128065262	15	104	3.4
2	128122375	128122625	250	128122462	18	130	9.5
2	128185450	128185650	200	128185512	18	127	1.4
2	128504250	128504550	300	128504412	24	208	8.2
2	128639650	128639950	300	128639787	33	253	8.9
2	128748125	128748400	275	128748237	25	195	13.6
2	128858675	128858725	50	128858687	18	33	2.7
2	128869925	128870325	400	128870137	39	429	32
2	128909300	128909625	325	128909437	19	182	5.5
2	128937375	128937825	450	128937537	27	333	7.5
2	129279150	129279500	350	129279337	70	638	21.8
2	129387275	129387625	350	129387437	70	675	20.4
2	129489825	129490200	375	129490012	45	441	13.6
2	129573300	129573550	250	129573387	18	144	0
2	129574850	129575000	150	129574962	15	74	3.4
2	129703450	129703750	300	129703562	17	159	0
2	129931375	129931600	225	129931537	26	173	5.5
2	130043350	130043750	400	130043537	51	505	5.5
2	130389350	130389675	325	130389462	41	360	10.9
2	130860275	130860575	300	130860437	34	266	13.6
2	130889750	130890025	275	130889887	21	186	3.4
2	130923950	130924225	275	130924062	23	180	8.2
2	131446750	131446925	175	131446837	16	89	6.1
2	131457100	131457375	275	131457237	18	161	6.1
2	131520300	131520450	150	131520362	17	82	6.8
2	131646950	131647175	225	131647112	34	243	8.9
2	131736050	131736375	325	131736262	31	299	9.5
2	131824875	131825275	400	131825012	60	603	12.3
2	131842625	131842900	275	131842762	24	211	7.5
2	131926775	131926975	200	131926862	19	119	6.8
2	132309300	132309475	175	132309312	28	138	14.3
2	132338650	132338925	275	132338812	23	181	10.9
2	132340925	132341125	200	132340937	18	119	13.6
2	132392925	132393275	350	132393062	36	336	23.2
2	132970050	132970350	300	132970287	23	184	13.6
2	133123600	133123925	325	133123787	34	292	20.4
2	134147650	134147975	325	134147812	36	310	13
2	134621025	134621225	200	134621162	17	109	10.9
2	134651900	134652425	525	134652112	61	810	19.1
2	134763950	134764275	325	134764112	50	431	25.9
2	135251550	135251650	100	135251562	19	75	7.5
2	135306125	135306550	425	135306337	52	560	5.5
2	135348075	135348400	325	135348237	46	397	29.3
2	135480500	135480775	275	135480612	29	243	8.2
2	135548375	135548575	200	135548462	16	107	5.5
2	135799075	135799375	300	135799187	23	209	6.1
2	136066775	136067150	375	136066937	76	694	10.9
2	136371375	136371525	150	136371512	15	71	7.5
2	136432875	136433075	200	136432937	15	99	2
2	136481975	136482175	200	136482112	16	100	0
2	136611150	136611350	200	136611237	16	107	0
2	136783950	136784175	225	136784037	18	124	6.1
2	136789950	136790025	75	136789962	18	41	4.8
2	136807825	136808100	275	136807937	26	237	10.2
2	137486425	137486625	200	137486487	17	110	6.8
2	138029425	138029650	225	138029537	18	134	4.1
2	138990050	138990225	175	138990162	15	92	10.9
2	139565150	139565425	275	139565287	19	152	0
2	139769250	139769550	300	139769387	39	337	18.4
2	139861975	139862000	25	139861987	15	15	1.4
2	139881100	139881375	275	139881212	16	138	0.7
2	140225250	140225400	150	140225312	18	89	1.4
2	140368125	140368625	500	140368312	46	599	18.4
2	140614300	140614500	200	140614362	17	110	0
2	140917525	140917825	300	140917712	29	246	10.2
2	140958150	140958525	375	140958337	34	330	14.3
2	141108575	141108925	350	141108762	53	458	30.7
2	141243225	141243500	275	141243362	18	151	0
2	141686625	141686800	175	141686662	21	133	6.8
2	142026025	142026425	400	142026187	27	293	18.4
2	142427200	142427400	200	142427337	16	110	10.2
2	142808900	142809300	400	142809012	21	258	13.6
2	142816350	142816600	250	142816462	19	138	4.8
2	143312450	143312675	225	143312562	20	135	4.1
2	143610275	143610475	200	143610387	15	101	6.1
2	143731125	143731500	375	143731337	30	304	5.5
2	143848375	143849100	725	143848512	47	740	21.8
2	143908675	143909000	325	143908862	44	369	19.8
2	144109575	144109925	350	144109737	39	394	24.5
2	144406700	144407100	400	144406912	26	308	4.8
2	145327750	145327975	225	145327862	28	192	10.2
2	145486150	145486475	325	145486287	38	344	25.2
2	145753950	145754425	475	145754237	63	678	29.3
2	145764800	145765000	200	145764837	25	165	14.3
2	145907725	145907925	200	145907812	16	111	5.5
2	145909900	145910150	250	145909987	15	121	8.2
2	145950500	145950775	275	145950662	24	176	12.3
2	145990700	145990925	225	145990837	15	106	4.8
2	145991425	145991900	475	145991712	59	692	18.4
2	145993750	145994150	400	145993937	148	1341	31.4
2	146092200	146092575	375	146092412	56	509	14.3
2	146158200	146158575	375	146158462	21	225	0
2	146188500	146188700	200	146188537	25	174	9.5
2	146322375	146323100	725	146322712	51	852	19.8
2	146514850	146515125	275	146514962	32	260	2.7
2	146525800	146526375	575	146525987	74	817	34.1
[truncated: 8,702 more rows]

## Sheet: SOX2 NPC
CHROM	START	END	LENGTH	PEAK POS	PEAK HEIGHT	TOTAL TARGET COUNTS	TOTAL BACKGROUND COUNTS
1	4561775	4562050	275	4561812	17	154	12.6
1	4847525	4847875	350	4847787	41	463	63
1	5012750	5013575	825	5013112	73	1118	87.3
1	5218800	5219100	300	5219087	29	256	10.8
1	5222900	5223200	300	5223087	45	378	5.4
1	6204600	6204925	325	6204762	22	222	22.5
1	6473625	6473650	25	6473637	17	17	1.8
1	6795075	6795175	100	6795137	17	60	3.6
1	7078700	7078900	200	7078812	36	255	29.7
1	7387900	7388075	175	7387937	24	144	16.2
1	9549650	9550000	350	9549837	78	682	41.4
1	9551550	9551725	175	9551637	19	121	4.5
1	9612600	9613050	450	9612912	19	288	18.9
1	9615300	9615400	100	9615362	18	67	4.5
1	9615675	9615775	100	9615712	37	132	9.9
1	9634375	9634825	450	9634562	68	810	53.1
1	9644175	9644375	200	9644287	29	198	15.3
1	9733700	9733750	50	9733712	25	49	5.4
1	10023000	10023500	500	10023112	23	363	55.8
1	11985825	11986100	275	11985962	17	160	7.2
1	12002050	12002150	100	12002112	17	61	0
1	12990450	12990650	200	12990487	34	202	9
1	13156475	13156575	100	13156487	19	71	4.5
1	13846350	13846575	225	13846437	24	163	10.8
1	13921275	13921575	300	13921387	17	172	14.4
1	14165550	14165850	300	14165562	24	263	31.5
1	14166700	14167000	300	14166912	38	330	8.1
1	14204075	14204375	300	14204212	34	300	16.2
1	14277600	14277825	225	14277662	25	201	10.8
1	16090900	16091000	100	16090987	18	61	1.8
1	16115225	16115400	175	16115312	23	150	12.6
1	16504850	16505000	150	16504962	21	105	0.9
1	16526025	16526150	125	16526062	17	79	3.6
1	16604350	16604450	100	16604437	18	63	5.4
1	16641900	16642250	350	16642162	29	336	45.9
1	16673800	16673850	50	16673837	18	35	3.6
1	17434625	17434700	75	17434687	19	50	0
1	17642625	17642750	125	17642712	22	92	5.4
1	17823725	17823900	175	17823762	16	99	4.5
1	20663125	20663450	325	20663312	30	284	36.9
1	20830775	20831025	250	20830937	20	171	7.2
1	20852575	20853000	425	20852862	54	600	49.5
1	20890875	20891000	125	20890962	19	78	8.1
1	21070075	21070150	75	21070087	18	51	4.5
1	21396800	21396975	175	21396837	18	105	6.3
1	21790150	21790525	375	21790312	115	1002	21.6
1	21815075	21815375	300	21815337	27	192	8.1
1	22569525	22569600	75	22569537	16	44	0
1	23157200	23157375	175	23157262	17	107	0
1	23210300	23210400	100	23210312	15	58	6.3
1	23210900	23211175	275	23211162	16	190	34.2
1	23717200	23717350	150	23717287	15	84	0
1	23789250	23789300	50	23789287	19	37	2.7
1	24028700	24028750	50	24028712	17	33	2.7
1	24953500	24953675	175	24953562	23	139	11.7
1	25110625	25110825	200	25110737	22	142	8.1
1	25173250	25173450	200	25173337	24	168	12.6
1	25775275	25775350	75	25775287	33	88	10.8
1	25829625	25829825	200	25829737	18	127	5.4
1	25836900	25837275	375	25837087	64	581	20.7
1	25837525	25837725	200	25837662	19	120	7.2
1	25941250	25941525	275	25941387	51	416	9
1	30894150	30894450	300	30894437	45	351	12.6
1	30894925	30894950	25	30894937	15	15	1.8
1	31003575	31003875	300	31003712	39	332	25.2
1	32987050	32987375	325	32987212	38	352	8.1
1	33159550	33159700	150	33159587	19	94	5.4
1	33759050	33759175	125	33759087	19	84	9
1	33950300	33950550	250	33950437	55	434	23.4
1	33955950	33955975	25	33955962	29	29	3.6
1	34095375	34095575	200	34095387	21	156	3.6
1	34248850	34248975	125	34248887	15	69	3.6
1	34404225	34404275	50	34404237	20	39	3.6
1	34528350	34528750	400	34528487	112	1162	18.9
1	34608700	34608825	125	34608812	16	68	2.7
1	34609300	34609325	25	34609312	15	15	1.8
1	34609650	34610125	475	34609937	89	1069	99
1	34610750	34610875	125	34610837	25	111	7.2
1	34635025	34635225	200	34635162	17	120	3.6
1	34641125	34641475	350	34641312	53	479	31.5
1	34664625	34664825	200	34664762	21	151	18
1	34786975	34787075	100	34787062	16	57	3.6
1	35413850	35414000	150	35413887	16	86	1.8
1	35549850	35550100	250	35549962	27	207	7.2
1	35755900	35756325	425	35756137	63	659	27.9
1	35814225	35814525	300	35814337	46	403	40.5
1	36188800	36189000	200	36188812	41	232	22.5
1	36248225	36248375	150	36248287	19	102	9.9
1	36252225	36252250	25	36252237	17	17	1.8
1	36252525	36252725	200	36252587	20	147	14.4
1	36254075	36254350	275	36254187	49	433	12.6
1	36436950	36437000	50	36436987	23	39	2.7
1	36472900	36473150	250	36473012	21	170	9
1	36500950	36501400	450	36501212	77	850	48.6
1	36501750	36501925	175	36501762	46	232	14.4
1	36534200	36534225	25	36534212	22	22	2.7
1	36540700	36540800	100	36540762	24	78	5.4
1	36592475	36592500	25	36592487	15	15	1.8
1	36628775	36628825	50	36628787	16	30	2.7
1	36636100	36636175	75	36636112	15	44	2.7
1	36654350	36654375	25	36654362	15	15	1.8
1	36654650	36654775	125	36654687	15	67	4.5
1	36806225	36806450	225	36806362	47	344	27
1	36864825	36865025	200	36864837	50	299	22.5
1	36884350	36884450	100	36884437	22	75	9
1	36894025	36894350	325	36894212	46	431	61.2
1	37164675	37164850	175	37164812	25	144	13.5
1	37277350	37277700	350	37277587	26	409	52.2
1	37295350	37295725	375	37295487	25	280	24.3
1	37485600	37485775	175	37485712	16	96	0.9
1	37809900	37809950	50	37809912	16	32	3.6
1	37834800	37835075	275	37835012	57	473	37.8
1	37904450	37904475	25	37904462	15	15	1.8
1	37941775	37941900	125	37941812	35	154	12.6
1	37942575	37942625	50	37942612	19	37	3.6
1	38074675	38074850	175	38074712	19	114	9.9
1	38143125	38143150	25	38143137	16	16	1.8
1	38252575	38252600	25	38252587	15	15	1.8
1	38252850	38252925	75	38252862	16	42	2.7
1	38278775	38278925	150	38278862	31	161	10.8
1	38395175	38395650	475	38395362	57	682	37.8
1	38792725	38792900	175	38792762	26	146	6.3
1	39480275	39480400	125	39480287	15	65	8.1
1	39512675	39512875	200	39512837	23	143	9.9
1	39521125	39521200	75	39521187	17	45	4.5
1	39645950	39646175	225	39646062	30	222	12.6
1	39680625	39680675	50	39680637	15	30	0
1	39694475	39694600	125	39694487	29	106	9
1	39704075	39704250	175	39704237	32	167	13.5
1	39750225	39750500	275	39750412	19	174	9
1	39783275	39783775	500	39783487	82	918	18.9
1	39845200	39845400	200	39845212	25	158	16.2
1	39845975	39846050	75	39845987	15	40	3.6
1	39863125	39863425	300	39863262	35	293	17.1
1	39881075	39881150	75	39881137	22	56	7.2
1	39886700	39886725	25	39886712	15	15	0.9
1	39889225	39889400	175	39889312	26	155	12.6
1	39892375	39892500	125	39892387	37	157	14.4
1	39921950	39922225	275	39921962	27	266	52.2
1	40062100	40062275	175	40062212	30	172	9.9
1	40972175	40972475	300	40972287	43	349	27
1	41085175	41085325	150	41085262	19	98	5.4
1	41102650	41102825	175	41102812	19	97	2.7
1	41334700	41335275	575	41334937	133	1468	36
1	41500275	41500525	250	41500387	18	149	0
1	41549650	41549850	200	41549712	22	149	9.9
1	41550275	41550625	350	41550487	30	320	11.7
1	41596425	41596500	75	41596487	17	47	3.6
1	41597225	41597475	250	41597362	28	210	20.7
1	42174275	42174475	200	42174337	22	149	3.6
1	42202450	42202625	175	42202512	17	98	7.2
1	42472325	42472400	75	42472337	19	54	4.5
1	42483200	42483800	600	42483637	65	811	51.3
1	42484100	42484350	250	42484187	18	154	11.7
1	42629375	42629525	150	42629487	22	115	8.1
1	42631375	42631550	175	42631387	35	189	18
1	42636075	42636450	375	42636287	32	358	11.7
1	42637950	42638075	125	42638037	19	86	7.2
1	42638375	42638475	100	42638437	15	57	0.9
1	42639825	42639950	125	42639937	15	67	5.4
1	42640425	42640450	25	42640437	22	22	2.7
1	42658075	42658225	150	42658087	42	160	18.9
1	42795800	42796075	275	42796062	16	158	31.5
1	42865525	42865700	175	42865537	34	176	4.5
1	43042800	43043000	200	43042937	26	144	9
1	43108500	43108800	300	43108637	37	312	14.4
1	43261650	43262125	475	43261862	112	1152	18
1	43302675	43303050	375	43302862	101	915	15.3
1	43390425	43390575	150	43390487	17	93	4.5
1	43391225	43391375	150	43391287	16	90	5.4
1	43475950	43475975	25	43475962	15	15	1.8
1	43639475	43639800	325	43639487	67	565	39.6
1	43643150	43643625	475	43643312	70	747	63
1	43659500	43659600	100	43659512	16	57	6.3
1	43772225	43772500	275	43772237	15	124	5.4
1	43878200	43878375	175	43878262	24	155	12.6
1	44046700	44047075	375	44047012	16	182	10.8
1	44063150	44063275	125	44063262	24	106	10.8
1	44092400	44092625	225	44092487	22	173	8.1
1	45035975	45036000	25	45035987	15	15	1.8
1	46798150	46798475	325	46798287	74	657	37.8
1	50842325	50842600	275	50842412	59	462	18
1	50872250	50872300	50	50872262	15	30	3.6
1	51059375	51059550	175	51059462	22	127	3.6
1	51160925	51161075	150	51160937	19	100	7.2
1	51260075	51260350	275	51260187	34	281	27.9
1	51422800	51422975	175	51422962	25	128	4.5
1	51581300	51581475	175	51581462	15	95	3.6
1	51796825	51797025	200	51796937	19	129	11.7
1	51824025	51824050	25	51824037	15	15	1.8
1	51859675	51859900	225	51859762	40	296	19.8
1	51941150	51941350	200	51941337	59	289	20.7
1	51941600	51941800	200	51941612	41	260	10.8
1	52058275	52058650	375	52058387	36	370	23.4
1	52063800	52063950	150	52063887	18	97	4.5
1	52541850	52542025	175	52542012	36	201	18
1	52597475	52597600	125	52597562	18	74	0
1	52662625	52662875	250	52662762	26	192	9.9
1	52702775	52702975	200	52702862	20	140	0
1	52789725	52789875	150	52789762	25	117	9.9
1	53241675	53241750	75	53241737	17	46	3.6
1	53297325	53297450	125	53297337	15	67	5.4
1	53729675	53729700	25	53729687	15	15	1.8
1	53768450	53768650	200	53768537	21	134	6.3
1	54195000	54195300	300	54195162	132	1095	49.5
1	54383350	54383550	200	54383437	15	109	1.8
1	54429500	54429850	350	54429662	59	529	3.6
1	54530100	54530400	300	54530212	50	429	2.7
1	54867275	54867450	175	54867437	16	98	11.7
1	54972025	54972125	100	54972087	31	119	10.8
1	55032500	55032850	350	55032537	28	283	22.5
1	55075475	55075675	200	55075512	22	156	8.1
1	55105700	55106025	325	55105837	26	255	4.5
1	55138075	55138100	25	55138087	17	17	1.8
1	55146550	55146675	125	55146562	25	92	6.3
1	55181700	55181825	125	55181712	19	84	2.7
1	55350325	55350350	25	55350337	22	22	2.7
1	55351175	55351200	25	55351187	15	15	1.8
1	55473250	55473400	150	55473387	21	96	9
1	56777850	56778125	275	56777987	28	232	20.7
1	56917150	56917200	50	56917187	20	32	1.8
1	56917675	56917925	250	56917737	18	164	16.2
1	56921800	56921975	175	56921862	20	128	11.7
1	57169475	57169550	75	57169487	25	59	5.4
1	57211400	57211600	200	57211462	20	136	0
1	57332450	57332700	250	57332637	27	218	12.6
1	57373550	57373650	100	57373562	34	134	12.6
1	57578650	57578850	200	57578737	17	118	4.5
1	57734600	57734775	175	57734612	22	128	9
1	57806575	57807000	425	57806862	22	285	27.9
1	57834975	57835100	125	57834987	23	107	14.4
1	57974275	57974300	25	57974287	15	15	0.9
1	57975025	57975300	275	57975262	32	272	18.9
1	58390050	58390275	225	58390087	30	254	23.4
1	58449375	58449575	200	58449462	24	172	13.5
1	58917925	58918050	125	58917937	51	223	15.3
1	59181725	59181775	50	59181762	17	31	2.7
1	59367900	59368050	150	59367912	21	107	4.5
1	59426525	59426700	175	59426637	29	176	17.1
1	59460800	59461125	325	59460862	51	507	31.5
1	59468675	59468850	175	59468687	15	91	1.8
1	59569975	59570075	100	59570062	18	63	3.6
1	59615175	59615200	25	59615187	20	20	1.8
1	59670250	59670450	200	59670312	23	160	4.5
1	59708025	59708175	150	59708087	19	95	8.1
1	59733625	59733850	225	59733687	19	142	0
1	59739950	59740225	275	59740062	33	258	7.2
1	59857100	59857575	475	59857487	34	379	22.5
1	60124900	60125050	150	60124912	21	111	7.2
1	60353800	60353950	150	60353887	18	97	8.1
1	60795725	60795975	250	60795837	20	169	2.7
1	61125675	61126000	325	61125812	22	214	27
1	61143225	61143525	300	61143237	15	151	7.2
1	61179050	61179125	75	61179087	18	49	3.6
1	61254650	61254900	250	61254787	23	190	0
1	61464700	61464825	125	61464712	24	91	3.6
1	61847225	61847600	375	61847412	44	474	14.4
1	62327375	62327575	200	62327462	20	139	9.9
1	62599325	62599500	175	62599362	23	143	9
1	62677600	62677950	350	62677787	31	339	18
1	62683975	62684125	150	62684112	22	103	8.1
1	62762575	62762675	100	62762662	15	52	1.8
1	62868300	62868700	400	62868637	22	293	35.1
1	63562625	63562725	100	63562637	15	52	4.5
1	63697625	63697775	150	63697762	28	130	7.2
1	63698425	63698575	150	63698462	27	124	5.4
1	63762775	63763025	250	63762887	26	202	9
1	63969525	63969550	25	63969537	19	19	1.8
1	64053750	64053825	75	64053762	16	43	3.6
1	64055950	64056725	775	64056537	111	1374	67.5
1	64077450	64077475	25	64077462	19	19	1.8
1	64108050	64108350	300	64108187	39	314	7.2
1	64123850	64124100	250	64123937	60	445	37.8
1	64130250	64130275	25	64130262	18	18	1.8
1	64130525	64130675	150	64130537	38	198	28.8
1	64154850	64155050	200	64154937	26	171	7.2
1	64240025	64240225	200	64240112	24	168	13.5
1	64472125	64472250	125	64472187	15	65	0
1	64589725	64589950	225	64589862	33	232	12.6
1	64725725	64725950	225	64725812	16	134	11.7
1	64773525	64773850	325	64773687	33	323	3.6
1	64787950	64788250	300	64788137	46	387	45.9
1	64794675	64794775	100	64794762	15	55	0
1	64851200	64851450	250	64851337	21	169	0
1	64920450	64920550	100	64920512	16	55	4.5
1	65113275	65113500	225	65113462	29	204	11.7
1	66111050	66111300	250	66111137	25	192	9.9
1	66160175	66160325	150	66160287	25	120	12.6
1	66253975	66254275	300	66254087	20	202	0
1	66254750	66254900	150	66254887	23	104	2.7
1	66319925	66320250	325	66320087	28	277	20.7
1	66502950	66503225	275	66503062	32	272	13.5
1	66550525	66550725	200	66550537	15	111	0
1	66588425	66588650	225	66588462	25	180	9
1	66622625	66622825	200	66622712	39	254	27.9
1	66625975	66626175	200	66626012	17	123	7.2
1	66711300	66711375	75	66711312	16	42	1.8
1	66750125	66750250	125	66750212	29	113	8.1
1	66795100	66795150	50	66795137	18	33	3.6
1	66796125	66796150	25	66796137	15	15	1.8
1	66829450	66829675	225	66829562	20	150	0.9
1	67293025	67293250	225	67293137	25	186	6.3
1	67330975	67331075	100	67331062	27	85	6.3
1	69090600	69090750	150	69090637	18	94	1.8
1	71035700	71036225	525	71035937	15	276	49.5
1	71473725	71474050	325	71473887	44	410	19.8
1	71586400	71586575	175	71586412	17	114	13.5
1	72002225	72002400	175	72002387	41	212	9
1	72075175	72075325	150	72075287	20	99	4.5
1	72145400	72145500	100	72145437	16	62	6.3
1	72162275	72162500	225	72162362	21	161	2.7
1	72188400	72188725	325	72188412	23	223	28.8
1	72240450	72240525	75	72240512	37	85	9.9
1	72312975	72313225	250	72313112	41	316	10.8
1	72316375	72316400	25	72316387	15	15	1.8
1	72470350	72470375	25	72470362	17	17	1.8
1	72516175	72516550	375	72516387	64	618	56.7
1	72526775	72526875	100	72526837	25	90	8.1
1	72653575	72653700	125	72653662	25	100	11.7
1	72673000	72673175	175	72673012	73	351	31.5
1	72792300	72792375	75	72792337	15	42	2.7
1	73102675	73102925	250	73102737	40	304	36
1	73204000	73204475	475	73204187	64	738	45
1	73574150	73574550	400	73574462	18	195	12.6
1	73576075	73576250	175	73576137	29	165	14.4
1	73677350	73677500	150	73677362	37	168	19.8
1	73784025	73784050	25	73784037	22	22	2.7
1	73796100	73796125	25	73796112	17	17	1.8
1	73797625	73797875	250	73797687	38	301	25.2
1	73875400	73875425	25	73875412	15	15	1.8
1	73877650	73877925	275	73877737	33	303	32.4
1	73931850	73932150	300	73932062	57	457	27.9
1	74044525	74044850	325	74044762	47	486	63
1	74052425	74052525	100	74052437	19	71	7.2
1	74218175	74218300	125	74218187	15	69	8.1
1	74228750	74229050	300	74229037	41	343	45.9
1	74265825	74265975	150	74265862	24	129	15.3
1	74276700	74276800	100	74276712	17	60	4.5
1	74320050	74320300	250	74320262	29	242	21.6
1	74438975	74439175	200	74439112	28	212	2.7
1	74439800	74440025	225	74439862	23	184	22.5
1	74475625	74475875	250	74475762	37	302	37.8
1	74521175	74521550	375	74521362	24	302	33.3
1	74594825	74595025	200	74594937	20	133	9
1	74741500	74741550	50	74741512	18	33	3.6
1	75063175	75063200	25	75063187	22	22	2.7
1	75075100	75075375	275	75075187	23	222	26.1
1	75117825	75118000	175	75117887	41	232	26.1
1	75200800	75201125	325	75200937	26	263	15.3
1	75283175	75283225	50	75283187	16	29	2.7
1	75329000	75329025	25	75329012	18	18	1.8
1	75922250	75922275	25	75922262	17	17	1.8
1	76166625	76166825	200	76166637	27	190	7.2
1	76418725	76419000	275	76418887	25	226	1.8
1	76526025	76526100	75	76526037	17	48	4.5
1	76825975	76826150	175	76826062	19	104	4.5
1	76927075	76927250	175	76927112	21	121	6.3
1	77254225	77254375	150	77254262	19	97	3.6
1	77293300	77293750	450	77293412	18	224	15.3
1	78254925	78255025	100	78254937	15	53	5.4
1	78420675	78420875	200	78420787	18	123	9.9
1	78476975	78477050	75	78477037	17	45	2.7
1	78528300	78528575	275	78528437	22	192	4.5
1	78640000	78640550	550	78640462	19	309	36.9
1	78731625	78731650	25	78731637	17	17	0.9
1	79319050	79319125	75	79319062	28	73	5.4
1	79519200	79519375	175	79519312	16	105	7.2
1	79576450	79576725	275	79576562	35	287	13.5
1	79640775	79640975	200	79640787	17	107	9.9
1	79654950	79654975	25	79654962	21	21	0.9
1	79711800	79712125	325	79711962	34	350	21.6
1	79737675	79737800	125	79737762	16	73	6.3
1	79739725	79739950	225	79739887	62	374	17.1
1	79897625	79897825	200	79897762	28	180	9
1	80116450	80116775	325	80116612	45	435	7.2
1	80219675	80219700	25	80219687	15	15	1.8
1	80220075	80220100	25	80220087	22	22	2.7
1	80263300	80263500	200	80263412	24	162	5.4
1	80287725	80287875	150	80287837	23	120	6.3
1	80516225	80516575	350	80516412	44	467	66.6
1	80531350	80531475	125	80531387	17	74	0.9
1	80535475	80535575	100	80535512	18	68	7.2
1	80588425	80588525	100	80588437	40	136	13.5
1	80607300	80607525	225	80607412	22	161	5.4
1	80733575	80733650	75	80733637	18	52	5.4
1	80976300	80976450	150	80976337	15	84	5.4
1	81099100	81099200	100	81099112	16	54	2.7
1	81160050	81160250	200	81160187	42	258	25.2
1	81180825	81180925	100	81180887	15	56	4.5
1	81766025	81766200	175	81766187	16	96	7.2
1	82029825	82030025	200	82029987	52	295	18.9
1	82122350	82122550	200	82122537	55	325	28.8
1	82162225	82162250	25	82162237	15	15	1.8
1	82170225	82170300	75	82170237	19	53	5.4
1	82170600	82170625	25	82170612	15	15	1.8
1	82195600	82195775	175	82195637	27	158	17.1
1	82308175	82308375	200	82308312	19	134	11.7
1	82355875	82356100	225	82355912	20	174	17.1
1	82513725	82513975	250	82513812	17	136	1.8
1	82603900	82604050	150	82603912	16	84	2.7
1	83785750	83786275	525	83786162	27	398	43.2
1	84034250	84034600	350	84034412	54	473	20.7
1	84322725	84322875	150	84322837	15	81	8.1
1	84500375	84500475	100	84500462	31	92	5.4
1	84575200	84575425	225	84575262	26	192	12.6
1	84718275	84718525	250	84718512	52	362	34.2
1	87551450	87551825	375	87551637	39	437	30.6
1	87574150	87574325	175	87574212	15	87	0
1	87684575	87684775	200	87684662	19	129	5.4
1	87733175	87733375	200	87733212	15	112	9
1	87748075	87748475	400	87748237	35	456	28.8
1	87752925	87753075	150	87753012	16	87	6.3
1	87753725	87754050	325	87753862	26	265	23.4
1	87759450	87759550	100	87759537	16	58	1.8
1	87800675	87800975	300	87800812	31	266	18.9
1	87838950	87839150	200	87839112	24	170	11.7
1	87863525	87863975	450	87863612	59	764	92.7
1	88010225	88010250	25	88010237	16	16	1.8
1	88190600	88190800	200	88190612	30	214	17.1
1	88265575	88266000	425	88265737	96	1006	24.3
1	88266700	88266900	200	88266762	29	198	10.8
1	88273550	88273900	350	88273812	68	593	26.1
1	88318400	88318450	50	88318437	17	33	3.6
1	88318675	88318875	200	88318712	81	482	43.2
1	88332425	88332450	25	88332437	15	15	1.8
1	88335275	88335750	475	88335412	67	741	33.3
1	88340600	88340975	375	88340787	116	1181	91.8
1	88342075	88342225	150	88342162	22	119	7.2
1	88356850	88356950	100	88356887	16	62	5.4
1	88357350	88358025	675	88357762	291	2955	42.3
1	88359425	88359525	100	88359437	19	67	5.4
1	88418125	88418350	225	88418262	27	204	7.2
1	88536750	88536825	75	88536812	21	59	5.4
1	88573950	88574375	425	88574087	33	373	27.9
1	88842025	88842100	75	88842037	18	45	4.5
1	88867050	88867200	150	88867087	19	95	9
1	89007150	89007375	225	89007187	25	181	12.6
1	89018300	89018450	150	89018362	18	96	9
1	89044850	89045000	150	89044987	37	157	11.7
1	89104875	89105000	125	89104887	31	115	12.6
1	89289250	89289450	200	89289287	18	135	7.2
1	89406000	89406200	200	89406162	37	212	17.1
1	89616875	89617675	800	89617612	47	833	57.6
1	89711175	89711275	100	89711187	31	106	14.4
1	89723025	89723150	125	89723037	29	102	13.5
1	89723675	89723800	125	89723787	29	100	3.6
1	90256000	90256100	100	90256012	21	73	6.3
1	90305675	90305775	100	90305762	24	78	8.1
1	90309275	90309825	550	90309437	48	748	36
1	90393700	90393850	150	90393737	32	168	15.3
1	90489450	90489925	475	90489687	152	1789	69.3
1	90530250	90530450	200	90530337	20	130	0
1	90576500	90576625	125	90576562	16	73	6.3
1	90640775	90641025	250	90640912	23	186	13.5
1	90671350	90671675	325	90671512	47	415	32.4
1	90755425	90755750	325	90755562	64	595	34.2
1	90768650	90768775	125	90768687	15	70	6.3
1	90872475	90872600	125	90872587	23	97	4.5
1	90901325	90901500	175	90901337	30	173	9.9
1	90967550	90967700	150	90967687	18	88	7.2
1	90968350	90968550	200	90968462	36	238	20.7
1	91059650	91059975	325	91059862	31	309	14.4
1	91231925	91232175	250	91232012	72	587	34.2
1	91256000	91256125	125	91256012	29	108	9
1	91286075	91286100	25	91286087	15	15	1.8
1	91397825	91397850	25	91397837	15	15	1.8
1	91520150	91520325	175	91520187	16	104	9
1	91691650	91691700	50	91691662	25	48	5.4
1	91707575	91707925	350	91707912	20	190	11.7
1	91765925	91766150	225	91765987	23	174	4.5
1	92110200	92110525	325	92110387	32	294	16.2
1	92120075	92120100	25	92120087	29	29	2.7
1	92122075	92122350	275	92122237	39	356	20.7
1	92563275	92563425	150	92563412	28	137	5.4
1	92564675	92564750	75	92564737	15	42	2.7
1	92798250	92798300	50	92798262	41	78	8.1
1	92805300	92805675	375	92805487	163	1611	39.6
1	92883275	92883675	400	92883512	22	260	18
1	92886175	92886475	300	92886312	40	388	39.6
1	92892775	92892975	200	92892937	26	175	19.8
1	93007275	93007550	275	93007462	62	469	28.8
1	93012600	93012750	150	93012687	19	97	9.9
1	93039900	93040575	675	93039987	55	917	99.9
1	93042150	93042225	75	93042212	19	47	4.5
1	93080400	93080700	300	93080562	37	374	41.4
1	93211025	93211075	50	93211037	16	31	2.7
1	93243450	93243825	375	93243662	64	614	35.1
1	93244450	93244900	450	93244662	88	951	36
1	93289825	93290125	300	93289937	85	768	42.3
1	93313750	93314000	250	93313887	25	188	9
1	93324900	93324950	50	93324912	16	31	3.6
1	93356350	93356575	225	93356387	30	205	9
1	93370775	93371125	350	93370862	24	268	12.6
1	93431075	93431200	125	93431162	25	109	13.5
1	93562850	93562975	125	93562912	17	77	0
1	93585775	93585825	50	93585787	20	34	2.7
1	93928925	93929100	175	93929087	15	100	11.7
1	93929900	93930300	400	93930062	17	240	32.4
1	93930750	93931225	475	93930937	35	548	65.7
1	93967500	93967825	325	93967687	74	673	48.6
1	94005075	94005175	100	94005162	15	56	3.6
1	94010650	94010925	275	94010912	30	301	41.4
1	94042400	94043000	600	94042562	74	987	90
1	94268350	94268600	250	94268412	16	137	2.7
1	94304175	94304375	200	94304187	16	100	12.6
1	94472400	94472425	25	94472412	15	15	1.8
1	94575300	94575375	75	94575362	16	43	3.6
1	94600250	94600375	125	94600337	20	84	9
1	94617575	94617625	50	94617612	32	59	6.3
1	94663100	94663225	125	94663112	16	71	7.2
1	95040725	95040925	200	95040837	38	267	24.3
1	95051375	95051425	50	95051412	20	38	3.6
1	95172975	95173175	200	95173162	24	125	9
1	95173800	95174075	275	95173962	54	444	22.5
1	95634200	95634400	200	95634212	21	150	5.4
1	95967250	95967425	175	95967312	25	144	14.4
1	96334125	96334500	375	96334387	53	495	15.3
1	97098675	97098800	125	97098762	25	114	9.9
1	99371175	99371500	325	99371312	110	973	44.1
1	99384175	99384625	450	99384337	68	868	29.7
1	99491425	99491600	175	99491437	15	103	14.4
1	99492150	99492200	50	99492187	15	27	1.8
1	99600500	99600675	175	99600587	26	164	13.5
1	99664250	99664375	125	99664337	15	66	0
1	99674150	99674275	125	99674187	17	79	0
1	100020700	100020925	225	100020787	25	174	11.7
1	103511475	103511675	200	103511637	23	141	1.8
1	106574300	106574675	375	106574512	104	968	37.8
1	106582025	106582175	150	106582162	19	94	4.5
1	106599550	106599775	225	106599687	18	137	6.3
1	106655775	106655950	175	106655812	16	94	0
1	106665650	106666225	575	106665862	73	793	36
1	106675900	106676100	200	106675987	18	129	0
1	107183175	107183300	125	107183212	15	66	2.7
1	107898825	107899125	300	107898962	33	279	11.7
1	107982675	107983200	525	107983062	46	634	79.2
1	107998950	107999150	200	107999087	39	287	30.6
1	108027150	108027575	425	108027337	71	719	15.3
1	108029500	108029875	375	108029687	84	765	41.4
1	108068600	108068925	325	108068787	56	486	32.4
1	108208050	108208400	350	108208237	15	172	0
1	108230750	108231025	275	108230812	28	226	5.4
1	108255775	108256100	325	108255837	19	262	33.3
1	108587100	108587600	500	108587462	62	689	79.2
1	108624250	108624275	25	108624262	17	17	1.8
1	108697675	108697800	125	108697762	15	66	3.6
1	110280350	110280500	150	110280387	15	84	5.4
1	113692525	113692550	25	113692537	18	18	1.8
1	114207550	114207700	150	114207587	15	82	5.4
1	115185850	115186125	275	115186037	87	737	53.1
1	115244450	115244650	200	115244537	20	142	14.4
1	115460875	115461150	275	115461037	27	219	6.3
1	116158300	116158425	125	116158312	33	115	12.6
1	118194350	118194425	75	118194387	22	56	4.5
1	120122725	120122775	50	120122737	17	32	3.6
1	120138950	120139075	125	120138962	15	75	9
1	120215650	120215850	200	120215762	17	116	2.7
1	120216525	120216900	375	120216537	22	254	18
1	120286425	120286650	225	120286537	25	177	6.3
1	120308950	120308975	25	120308962	15	15	1.8
1	120522075	120522275	200	120522187	24	147	7.2
1	120808375	120808400	25	120808387	16	16	1.8
1	120861325	120861650	325	120861562	51	477	26.1
1	120877525	120877725	200	120877637	28	197	9.9
1	120915225	120915425	200	120915262	16	113	14.4
1	121082975	121083400	425	121083162	73	786	99.9
1	121084375	121084650	275	121084462	44	399	25.2
1	121087075	121087225	150	121087112	23	117	12.6
1	121156450	121156750	300	121156612	56	475	28.8
1	121217875	121217900	25	121217887	15	15	1.8
1	121281300	121281500	200	121281412	24	168	15.3
1	121332225	121332575	350	121332412	23	264	27.9
1	121352675	121352775	100	121352687	15	51	5.4
1	121361150	121361250	100	121361162	19	70	3.6
1	121706625	121706775	150	121706637	15	86	10.8
1	121740625	121740825	200	121740712	35	233	18.9
1	121943425	121943650	225	121943487	57	391	38.7
1	121970100	121970325	225	121970237	47	304	18.9
1	122073375	122073675	300	122073537	40	360	27
1	122185175	122185225	50	122185187	16	28	1.8
1	122914650	122915050	400	122914887	60	638	61.2
1	122939625	122939775	150	122939637	34	150	18.9
1	123004750	123005025	275	123004912	41	365	10.8
1	123007950	123008150	200	123007987	17	123	5.4
1	123142625	123142875	250	123142762	26	214	23.4
1	127388375	127388550	175	127388437	23	140	12.6
1	127467275	127467425	150	127467287	16	90	11.7
1	127956875	127956900	25	127956887	15	15	1.8
1	128259350	128259450	100	128259362	15	53	6.3
1	128487900	128488350	450	128488037	24	347	43.2
1	128511200	128512000	800	128511737	99	1390	32.4
1	128657825	128658525	700	128658062	32	621	64.8
1	128693300	128693400	100	128693312	23	75	6.3
1	128753075	128753100	25	128753087	16	16	0
1	128753400	128753500	100	128753412	16	53	0.9
1	128935200	128935375	175	128935237	31	163	6.3
1	129032450	129032550	100	129032462	16	59	4.5
1	129166725	129166775	50	129166737	16	32	3.6
1	129176075	129176300	225	129176262	40	269	9
1	129196400	129196600	200	129196437	24	164	9.9
1	129601525	129601975	450	129601537	33	339	51.3
1	130112825	130113025	200	130112887	29	180	20.7
1	130232475	130232875	400	130232762	22	395	53.1
1	130299700	130300200	500	130300087	46	530	58.5
1	130360275	130360375	100	130360362	15	57	5.4
1	130379400	130379525	125	130379412	23	101	2.7
1	130388925	130389275	350	130389037	49	485	24.3
1	130405950	130406225	275	130406087	35	270	15.3
1	130413525	130414050	525	130413687	22	365	39.6
1	130423025	130423275	250	130423187	40	270	9.9
1	130684525	130684775	250	130684637	27	206	13.5
1	131747000	131747250	250	131747112	19	148	5.4
1	132290025	132290200	175	132290062	20	118	6.3
1	132543100	132543175	75	132543162	15	39	4.5
1	132543425	132543600	175	132543562	25	145	8.1
1	132906250	132906750	500	132906537	117	1324	89.1
1	133009300	133009375	75	133009337	15	43	2.7
1	133179325	133179500	175	133179362	17	104	10.8
1	133181725	133181800	75	133181787	16	41	2.7
1	133206100	133206625	525	133206462	26	374	10.8
1	133259525	133259675	150	133259537	22	119	15.3
1	133288825	133289025	200	133288937	16	105	5.4
1	133301150	133301550	400	133301337	36	395	9.9
1	133354800	133354950	150	133354887	15	79	2.7
1	133382725	133383025	300	133382887	31	257	5.4
1	133485600	133485800	200	133485762	21	137	12.6
1	133579450	133579875	425	133579762	18	217	33.3
1	133598200	133598375	175	133598362	23	131	11.7
1	133737725	133737950	225	133737862	23	170	5.4
1	133765350	133765500	150	133765362	16	88	3.6
1	133809325	133809500	175	133809362	36	202	21.6
1	133873975	133874050	75	133873987	15	41	2.7
1	133938950	133939075	125	133938962	18	85	9
1	133985075	133985225	150	133985112	21	98	2.7
1	134028425	134028475	50	134028437	24	40	4.5
1	134040800	134040875	75	134040812	15	45	5.4
1	134049725	134050050	325	134049912	86	724	75.6
1	134144950	134145075	125	134145012	15	69	1.8
1	134150375	134150650	275	134150437	24	208	25.2
1	134202975	134203150	175	134202987	18	112	1.8
1	134258400	134258475	75	134258462	16	44	0.9
1	134304525	134304800	275	134304612	30	242	18
1	134353700	134353750	50	134353712	17	32	3.6
1	134555125	134555425	300	134555262	48	386	27.9
1	134671700	134671800	100	134671787	18	61	4.5
1	134709000	134709200	200	134709112	26	170	8.1
1	134852825	134852925	100	134852912	18	67	10.8
1	134873625	134873800	175	134873637	32	163	11.7
1	134896625	134896750	125	134896687	18	80	7.2
1	134899650	134899675	25	134899662	15	15	1.8
1	134958800	134958825	25	134958812	23	23	2.7
1	135006350	135006525	175	135006387	24	144	10.8
1	135095600	135095800	200	135095637	26	170	15.3
1	135220800	135221025	225	135220912	25	175	9.9
1	135225275	135225425	150	135225412	27	112	8.1
1	135320150	135320375	225	135320212	24	158	6.3
1	135488900	135489100	200	135488937	40	228	19.8
1	135778150	135778200	50	135778187	19	36	1.8
1	135854975	135855000	25	135854987	19	19	1.8
1	135862525	135862650	125	135862537	18	82	3.6
1	135865125	135865300	175	135865237	33	187	5.4
1	135877450	135877825	375	135877737	40	507	39.6
1	135879250	135880125	875	135879687	63	1282	108.9
1	135895550	135895675	125	135895612	26	118	4.5
1	135896350	135896475	125	135896437	21	91	5.4
1	135912700	135913125	425	135912862	52	587	48.6
1	135915550	135915725	175	135915587	16	107	0.9
1	136021925	136022025	100	136021937	18	63	2.7
1	136036050	136036250	200	136036087	40	242	19.8
1	136061600	136061775	175	136061612	31	165	17.1
1	136082250	136082400	150	136082387	46	188	23.4
1	136123900	136124075	175	136124012	20	120	10.8
1	136149300	136149325	25	136149312	15	15	1.8
1	136373325	136373675	350	136373512	34	344	36.9
1	136675300	136675375	75	136675312	16	43	0
1	136778675	136778875	200	136778837	24	154	8.1
1	136975075	136975300	225	136975212	57	440	27
1	136975525	136975825	300	136975687	99	855	51.3
1	136979200	136979350	150	136979237	15	80	5.4
1	137004775	137004950	175	137004837	25	164	14.4
1	137164075	137164125	50	137164087	15	30	2.7
1	137164350	137164400	50	137164387	18	34	2.7
1	137247075	137247100	25	137247087	17	17	1.8
1	137331750	137331900	150	137331837	25	134	9.9
1	137361350	137361375	25	137361362	16	16	1.8
1	137365325	137365350	25	137365337	15	15	1.8
1	137380275	137380475	200	137380337	16	121	10.8
1	137400050	137400200	150	137400062	23	134	16.2
1	137476125	137476200	75	137476137	16	43	1.8
1	137486950	137487050	100	137486962	17	69	6.3
1	137493475	137493650	175	137493537	18	104	1.8
1	137557400	137557875	475	137557662	114	1230	44.1
1	137569475	137569575	100	137569512	21	78	4.5
1	137597625	137597750	125	137597737	33	145	14.4
1	137618550	137618575	25	137618562	17	17	1.8
1	137638150	137638375	225	137638262	21	147	12.6
1	137668800	137669100	300	137668962	61	515	27
1	137936475	137936600	125	137936487	25	106	2.7
1	137947625	137947925	300	137947762	21	210	15.3
1	137956675	137956925	250	137956687	31	269	13.5
1	137958850	137959000	150	137958937	22	112	11.7
1	138162525	138162700	175	138162662	23	132	9
1	138179050	138179175	125	138179112	22	105	11.7
1	138197800	138197825	25	138197812	17	17	1.8
1	138231700	138231800	100	138231712	15	56	1.8
1	138278975	138279000	25	138278987	16	16	1.8
1	138547075	138547200	125	138547137	17	77	2.7
1	138585600	138585625	25	138585612	17	17	1.8
1	139071600	139071800	200	139071637	18	121	1.8
1	139194975	139195225	250	139195087	34	260	11.7
1	139407725	139408000	275	139407837	32	254	14.4
1	139473250	139473350	100	139473337	25	80	9
1	139473675	139473925	250	139473762	19	156	5.4
1	139716650	139716850	200	139716687	23	159	13.5
1	139719850	139720000	150	139719912	15	82	0
1	139744475	139744650	175	139744537	25	146	5.4
1	139744975	139745350	375	139745162	60	595	32.4
1	139846150	139846400	250	139846312	20	171	10.8
1	140142475	140143150	675	140142862	38	600	37.8
1	140412700	140412750	50	140412712	23	46	5.4
1	141153450	141153700	250	141153587	22	166	2.7
1	141162925	141163375	450	141163287	51	703	54
1	142914175	142914275	100	142914187	22	79	9
1	144896725	144897100	375	144896912	117	983	21.6
1	145539325	145539475	150	145539462	18	97	7.2
1	145582775	145583000	225	145582887	20	152	0
1	145703725	145703825	100	145703812	15	53	6.3
1	145752075	145752325	250	145752187	28	211	0
1	148606250	148606625	375	148606437	24	283	16.2
1	152298000	152298200	200	152298112	17	121	5.4
1	152308325	152308450	125	152308387	17	80	7.2
1	152521725	152521850	125	152521837	30	114	5.4
1	152704425	152704500	75	152704462	15	44	4.5
1	153105275	153105300	25	153105287	17	17	1.8
1	153107500	153107600	100	153107512	15	56	3.6
1	153190825	153190950	125	153190912	29	133	12.6
1	153262850	153263050	200	153263037	16	117	11.7
1	153394400	153394525	125	153394437	19	83	3.6
1	153448275	153448400	125	153448387	15	66	7.2
1	153517300	153517475	175	153517387	25	159	15.3
1	153640675	153640925	250	153640762	24	199	0
1	153688025	153688200	175	153688112	17	103	0
1	153707600	153707900	300	153707737	35	324	4.5
1	153927550	153928125	575	153927837	57	771	32.4
1	153976825	153976900	75	153976837	27	70	7.2
1	154177025	154177125	100	154177037	16	64	7.2
1	154202100	154202250	150	154202237	28	120	16.2
1	154224100	154224400	300	154224237	32	252	14.4
1	154318400	154318825	425	154318612	70	720	59.4
1	154355000	154355300	300	154355137	42	380	36.9
1	154579300	154579325	25	154579312	15	15	1.8
1	154580150	154580325	175	154580312	24	136	16.2
1	154666750	154667100	350	154666912	55	483	14.4
1	154773800	154773875	75	154773837	16	47	4.5
1	154776975	154777175	200	154777062	19	131	9
1	154795400	154795450	50	154795437	15	29	1.8
1	154799975	154800175	200	154800062	67	446	13.5
1	154802300	154802600	300	154802462	70	605	34.2
1	154822075	154822275	200	154822187	20	140	9
1	154846300	154846650	350	154846512	71	666	23.4
1	154870200	154870225	25	154870212	16	16	1.8
1	154954125	154954450	325	154954312	35	314	16.2
1	154964400	154964500	100	154964487	29	98	9.9
1	155027500	155027525	25	155027512	15	15	0.9
1	155070925	155071050	125	155070937	16	67	4.5
1	155071325	155071375	50	155071337	16	30	1.8
1	155249625	155249825	200	155249787	22	135	6.3
1	155268375	155268925	550	155268712	114	1399	18
1	155350300	155350325	25	155350312	16	16	1.8
1	155357100	155357200	100	155357187	19	62	0
1	155397925	155398000	75	155397937	15	40	4.5
1	155465600	155465950	350	155465787	88	849	48.6
1	155466225	155466250	25	155466237	15	15	1.8
1	155492925	155493050	125	155493037	30	113	9.9
1	155511550	155511650	100	155511587	31	110	7.2
1	155661875	155662275	400	155662137	27	344	29.7
1	155662825	155662925	100	155662837	23	64	8.1
1	155864975	155865500	525	155865212	113	1343	34.2
1	155912375	155912550	175	155912462	31	184	21.6
1	155919050	155919275	225	155919187	26	201	9
1	156262725	156262825	100	156262812	24	75	4.5
1	156582300	156582475	175	156582387	20	122	9.9
1	156745300	156745775	475	156745687	55	739	101.7
1	156788050	156788300	250	156788162	20	167	13.5
1	156814175	156814275	100	156814187	16	60	4.5
1	156818400	156818500	100	156818487	22	71	6.3
1	156825150	156825375	225	156825312	34	251	22.5
1	156845350	156845725	375	156845537	69	670	35.1
1	156854800	156854875	75	156854812	18	50	1.8
1	156876400	156876500	100	156876412	15	55	5.4
1	156974775	156975400	625	156974937	87	917	71.1
1	156996150	156996200	50	156996162	36	68	7.2
1	156996625	156996725	100	156996637	16	60	3.6
1	156999225	156999300	75	156999237	18	52	4.5
1	157460750	157460800	50	157460762	17	32	0
1	157484500	157484750	250	157484637	19	160	9.9
1	157798200	157798350	150	157798287	30	165	20.7
1	157803050	157803200	150	157803087	23	118	13.5
1	158511300	158511400	100	158511312	16	55	2.7
1	158591250	158591475	225	158591387	48	354	33.3
1	158767900	158768075	175	158768037	17	102	0
1	158834600	158834975	375	158834737	85	873	36
1	158876450	158876600	150	158876462	16	85	5.4
1	158951225	158951325	100	158951287	18	67	3.6
1	159093400	159093550	150	159093462	21	119	10.8
1	159249175	159249200	25	159249187	15	15	1.8
1	159254700	159254875	175	159254712	15	116	14.4
1	159277000	159277275	275	159277137	35	305	21.6
1	159283025	159283300	275	159283162	18	160	7.2
1	159283875	159284050	175	159284037	34	173	23.4
1	159338275	159338475	200	159338362	21	145	0
1	159355025	159355075	50	159355037	17	30	2.7
1	159390950	159391150	200	159390987	23	164	3.6
1	160147225	160147425	200	160147337	17	110	6.3
1	160193075	160193125	50	160193087	17	34	3.6
1	160223300	160223900	600	160223712	69	757	7.2
1	160326675	160326700	25	160326687	24	24	2.7
1	160391000	160391100	100	160391012	17	65	7.2
1	161250100	161250250	150	161250212	27	138	9.9
1	161330725	161330800	75	161330762	16	45	4.5
1	161331025	161331225	200	161331087	20	141	7.2
1	161431025	161431050	25	161431037	22	22	1.8
1	161497875	161498200	325	161498062	34	326	20.7
1	161507575	161507950	375	161507762	63	681	42.3
1	161523100	161523300	200	161523212	49	310	29.7
1	161526825	161527025	200	161527012	15	108	7.2
1	161597725	161597825	100	161597812	22	68	4.5
1	162031575	162031775	200	162031737	22	129	7.2
1	162049325	162049500	175	162049487	15	88	1.8
1	162049800	162049900	100	162049812	35	126	11.7
1	162188600	162188750	150	162188737	24	117	14.4
1	162278400	162278475	75	162278462	16	44	0
1	162368025	162368350	325	162368287	46	426	22.5
1	162371725	162371925	200	162371787	23	142	10.8
1	162692575	162692825	250	162692737	43	310	5.4
1	162743200	162743575	375	162743387	30	363	27.9
1	162907375	162907550	175	162907437	86	499	53.1
1	162968050	162968075	25	162968062	16	16	1.8
1	163061600	163061650	50	163061637	18	33	3.6
1	163087025	163087075	50	163087037	18	30	2.7
1	163713450	163713625	175	163713612	49	266	29.7
1	163836550	163837125	575	163836912	50	741	36
1	163918700	163918925	225	163918737	23	174	17.1
1	163944875	163945100	225	163945062	29	217	21.6
1	164033650	164033950	300	164033762	22	202	3.6
1	164046200	164046575	375	164046362	26	286	5.4
1	164132075	164132350	275	164132187	17	147	0.9
1	164385325	164385350	25	164385337	16	16	1.8
1	164407175	164407300	125	164407187	38	164	14.4
1	164577250	164577375	125	164577287	33	147	11.7
1	164668850	164669250	400	164669012	82	791	19.8
1	165093950	165094150	200	165094037	20	143	4.5
1	165175575	165175750	175	165175687	26	152	9.9
1	165240225	165240300	75	165240287	19	51	5.4
1	165260475	165260575	100	165260512	16	56	0
1	165454825	165455000	175	165454937	15	92	2.7
1	165477500	165477525	25	165477512	15	15	1.8
1	165616200	165616225	25	165616212	17	17	1.8
1	165831400	165831500	100	165831487	16	56	5.4
1	166143900	166144000	100	166143962	16	62	6.3
1	166541425	166541450	25	166541437	17	17	1.8
1	166607400	166607525	125	166607412	17	77	9
1	166735600	166735800	200	166735687	17	122	5.4
1	166883250	166883575	325	166883412	47	406	49.5
1	166941475	166941525	50	166941487	16	31	3.6
1	166956250	166956275	25	166956262	15	15	0.9
1	167028275	167028425	150	167028362	24	127	7.2
1	167297175	167297450	275	167297312	25	217	9
1	167297850	167298025	175	167297887	23	145	8.1
1	167425850	167425950	100	167425937	30	91	1.8
1	167572875	167572900	25	167572887	16	16	1.8
1	167600500	167600525	25	167600512	17	17	1.8
1	167690500	167690650	150	167690562	18	95	6.3
1	167771725	167772050	325	167771887	30	283	8.1
1	167803200	167803575	375	167803387	59	550	0
1	167839700	167840150	450	167839712	17	240	12.6
1	167880625	167880775	150	167880762	22	116	12.6
1	167990150	167990300	150	167990237	19	99	8.1
1	167990950	167991075	125	167991012	18	83	9.9
1	168119350	168119700	350	168119487	74	816	64.8
1	168644100	168644125	25	168644112	16	16	1.8
1	168722250	168722400	150	168722287	16	87	0
1	168919575	168919775	200	168919637	27	167	11.7
1	169076600	169076825	225	169076762	28	207	9.9
1	169106750	169106825	75	169106762	33	94	7.2
1	169107225	169107375	150	169107287	25	133	8.1
1	169145025	169145175	150	169145037	15	88	9.9
1	169303625	169303800	175	169303712	23	144	9.9
1	169618650	169618675	25	169618662	16	16	1.8
1	169883125	169883425	300	169883162	26	222	21.6
1	170017500	170017550	50	170017512	16	31	1.8
1	170035025	170035125	100	170035112	17	59	2.7
1	170052900	170052925	25	170052912	36	36	4.5
1	170124575	170124625	50	170124587	15	30	2.7
1	170127925	170127950	25	170127937	15	15	1.8
1	170219625	170219700	75	170219687	15	40	2.7
1	170221075	170221150	75	170221137	20	52	2.7
1	170386800	170386975	175	170386912	20	117	9
1	170888725	170888875	150	170888737	23	121	14.4
1	170930225	170930600	375	170930412	81	748	26.1
1	171199150	171199350	200	171199287	15	104	3.6
1	171304400	171304925	525	171304712	83	975	46.8
1	171321325	171321625	300	171321487	38	329	0.9
1	171321950	171322625	675	171322462	45	713	28.8
1	171805900	171806250	350	171806062	62	554	39.6
1	171822900	171823175	275	171823062	29	240	28.8
1	171973125	171973375	250	171973137	36	302	50.4
1	172132000	172132025	25	172132012	15	15	1.8
1	172261325	172261650	325	172261412	107	895	33.3
1	172296500	172296875	375	172296687	50	473	41.4
1	172358200	172358500	300	172358387	45	387	28.8
1	172481100	172481250	150	172481137	33	153	13.5
1	172492175	172492350	175	172492287	36	189	4.5
1	172541775	172541950	175	172541912	22	144	14.4
1	172870525	172870650	125	172870612	19	82	9.9
1	172874800	172875000	200	172874987	15	121	18.9
1	172947725	172948025	300	172947737	24	180	27.9
1	172987300	172987325	25	172987312	16	16	1.8
1	173059250	173059350	100	173059262	15	59	7.2
1	173083775	173084000	225	173083887	45	317	29.7
1	173165725	173166000	275	173165887	36	311	39.6
1	173182250	173182275	25	173182262	17	17	1.8
1	173249150	173249250	100	173249237	24	68	6.3
1	173338225	173338425	200	173338362	17	113	1.8
1	173339950	173340175	225	173340137	26	181	13.5
1	173340800	173340875	75	173340812	17	46	0
1	173853675	173853825	150	173853787	27	165	19.8
1	173863875	173864300	425	173864062	77	754	45.9
1	173885175	173885475	300	173885337	31	254	5.4
1	173936400	173936425	25	173936412	21	21	1.8
1	173968975	173969100	125	173969087	16	67	7.2
1	173984850	173984875	25	173984862	16	16	1.8
1	174038050	174038100	50	174038062	18	36	3.6
1	174039000	174039175	175	174039112	36	216	18.9
1	174039975	174040175	200	174039987	35	228	14.4
1	174186525	174186925	400	174186712	148	1504	87.3
1	174194350	174194425	75	174194362	16	48	2.7
1	174212925	174213100	175	174213037	31	166	8.1
1	174318725	174318900	175	174318837	26	157	17.1
1	174431225	174431425	200	174431362	17	112	3.6
1	174469650	174469675	25	174469662	18	18	1.8
1	174684125	174684250	125	174684212	15	66	0
1	175226575	175226775	200	175226762	19	132	10.8
1	176338475	176338525	50	176338487	16	32	2.7
1	176965200	176965675	475	176965262	29	409	21.6
1	177222375	177222675	300	177222537	24	218	6.3
1	177462425	177462625	200	177462487	18	128	9
1	177529050	177529200	150	177529112	15	82	4.5
1	177717275	177717350	75	177717287	20	57	5.4
1	178611275	178611475	200	178611312	22	155	9
1	178650000	178650125	125	178650087	27	110	9
1	178650725	178651050	325	178650887	113	1073	37.8
1	178686175	178686375	200	178686262	17	111	0
1	178822950	178823200	250	178823062	23	179	11.7
1	178823750	178824025	275	178823837	20	166	14.4
1	178834700	178834725	25	178834712	17	17	1.8
1	178835900	178836100	200	178835937	18	118	4.5
1	178986975	178987525	550	178987362	37	526	22.5
1	179012125	179012475	350	179012287	40	389	11.7
1	179175550	179175850	300	179175737	48	446	45.9
1	179248025	179248350	325	179248212	31	289	20.7
1	179278175	179278225	50	179278212	15	28	2.7
1	179281125	179281225	100	179281212	24	79	6.3
1	179282200	179282325	125	179282287	16	72	4.5
1	179283825	179284575	750	179283962	30	627	46.8
1	179332050	179332100	50	179332062	19	34	3.6
1	179392300	179392625	325	179392512	40	408	34.2
1	179460075	179460250	175	179460212	32	205	21.6
1	179477175	179477550	375	179477362	46	435	37.8
1	179537450	179537475	25	179537462	16	16	1.8
1	179633250	179633425	175	179633387	23	125	9.9
1	180154775	180155875	1100	180155412	73	1640	114.3
1	180173075	180173275	200	180173237	49	305	26.1
1	180174600	180174625	25	180174612	17	17	1.8
1	180194550	180194675	125	180194562	16	67	7.2
1	180242675	180242800	125	180242787	19	82	4.5
1	180285975	180286150	175	180286112	18	146	19.8
1	180300625	180300750	125	180300662	18	78	2.7
1	180878575	180878900	325	180878887	34	268	34.2
1	181283275	181283575	300	181283412	49	419	17.1
1	181382875	181383175	300	181382912	29	257	23.4
1	181482500	181482600	100	181482587	15	56	5.4
1	181640125	181640725	600	181640587	30	450	45.9
1	181679250	181679450	200	181679337	19	134	11.7
1	182051775	182051800	25	182051787	17	17	1.8
1	182149350	182149650	300	182149537	31	294	32.4
1	182167225	182167250	25	182167237	15	15	0
1	182214150	182214350	200	182214212	17	115	0
1	182224375	182224425	50	182224387	18	35	3.6
1	182227275	182227375	100	182227312	24	91	5.4
1	182230075	182230325	250	182230287	23	191	9
1	182477950	182478150	200	182478037	26	198	17.1
1	182562725	182562800	75	182562737	15	41	3.6
1	182649275	182649350	75	182649337	15	42	2.7
1	182650125	182650400	275	182650212	39	309	18.9
1	182650725	182651100	375	182651087	18	218	30.6
1	182685050	182685750	700	182685437	125	1994	88.2
1	182687375	182687750	375	182687537	44	476	23.4
1	182770350	182770675	325	182770512	67	567	14.4
1	182782400	182782450	50	182782437	18	35	1.8
1	182853150	182853375	225	182853337	36	242	23.4
1	182854125	182854175	50	182854137	16	31	2.7
1	183048600	183048775	175	183048687	19	126	12.6
1	183230425	183230725	300	183230612	39	349	17.1
1	183389275	183389425	150	183389337	27	150	13.5
1	183630350	183630550	200	183630362	16	109	0
1	183718350	183718375	25	183718362	15	15	1.8
1	183889775	183890000	225	183889837	16	127	0
1	183940425	183940475	50	183940462	17	32	3.6
1	183952650	183952700	50	183952687	16	31	0
1	184178275	184178350	75	184178312	16	42	2.7
1	184234975	184235150	175	184235012	37	220	22.5
1	184245875	184246025	150	184245937	16	88	0
1	184311675	184311950	275	184311837	38	332	15.3
1	184755575	184755625	50	184755612	32	62	7.2
1	185222900	185223150	250	185222987	22	187	8.1
1	185275350	185275475	125	185275362	25	103	8.1
1	185485050	185485350	300	185485112	18	185	27
1	185493500	185493900	400	185493637	40	442	25.2
1	185703825	185703850	25	185703837	15	15	1.8
1	185734925	185735400	475	185735362	44	499	58.5
1	185735775	185735825	50	185735787	25	47	3.6
1	185767300	185767575	275	185767487	41	333	7.2
1	186142350	186142425	75	186142362	18	51	4.5
1	186142725	186142800	75	186142737	18	48	5.4
1	186150250	186150300	50	186150262	17	34	3.6
1	186150525	186150575	50	186150537	23	41	4.5
1	186155025	186155325	300	186155162	31	309	18
1	186449550	186449675	125	186449562	20	81	6.3
1	186571050	186571200	150	186571137	20	92	0
1	186901900	186902075	175	186902037	46	279	34.2
1	187063600	187063725	125	187063612	36	165	17.1
1	187318575	187318775	200	187318712	21	153	9
1	187382325	187382400	75	187382362	16	46	2.7
1	187441975	187442250	275	187442212	17	156	11.7
1	187951150	187951325	175	187951237	18	102	7.2
1	188100650	188100675	25	188100662	15	15	1.8
1	188175700	188175875	175	188175812	24	133	11.7
1	188310750	188311000	250	188310812	20	170	15.3
1	188328375	188328575	200	188328537	37	227	11.7
1	188341875	188342050	175	188342037	21	119	3.6
1	188355875	188356275	400	188356162	56	624	21.6
1	188422950	188423050	100	188422962	17	63	2.7
1	188449975	188450100	125	188450087	28	104	10.8
1	188753450	188753550	100	188753462	30	104	11.7
1	188777550	188777575	25	188777562	15	15	1.8
1	189032025	189032150	125	189032112	17	72	3.6
1	189676275	189676475	200	189676387	24	152	13.5
1	189818950	189819275	325	189819112	96	786	61.2
1	190034925	190035050	125	190034937	22	89	7.2
1	190169125	190169425	300	190169187	16	154	9
1	190430075	190430275	200	190430087	24	166	7.2
1	190586775	190586925	150	190586812	16	87	5.4
1	190649275	190649325	50	190649312	17	33	3.6
1	190708675	190708700	25	190708687	19	19	0.9
1	190888400	190888850	450	190888687	120	1298	22.5
1	190929600	190929725	125	190929612	16	75	4.5
1	191345775	191346175	400	191345912	28	366	38.7
1	191628525	191628750	225	191628612	23	159	0
1	191780800	191780975	175	191780812	23	149	9
1	191838975	191839000	25	191838987	15	15	1.8
1	191890900	191891150	250	191891037	25	195	7.2
1	192102650	192102850	200	192102737	30	195	4.5
1	192382925	192383025	100	192383012	25	87	9.9
1	192428700	192429125	425	192428787	22	249	23.4
1	192629175	192629225	50	192629212	18	35	3.6
1	192679700	192680025	325	192679887	46	397	9.9
1	192696325	192696525	200	192696462	17	119	10.8
1	192726875	192726950	75	192726887	17	44	0.9
1	192763600	192763625	25	192763612	17	17	1.8
1	192976350	192976375	25	192976362	16	16	1.8
1	192993075	192993375	300	192993212	56	466	34.2
1	193171475	193171575	100	193171487	16	60	4.5
1	193276550	193276725	175	193276562	28	165	16.2
1	193342250	193342275	25	193342262	19	19	1.8
1	193485775	193486050	275	193485887	28	229	13.5
1	193509700	193509775	75	193509762	19	51	5.4
1	193521900	193521975	75	193521962	33	84	8.1
1	193681700	193682000	300	193681937	20	209	29.7
1	193690475	193690750	275	193690587	27	231	11.7
1	194535350	194535775	425	194535562	156	1596	23.4
1	194830875	194830975	100	194830962	26	79	4.5
1	194852000	194852200	200	194852012	20	125	12.6
1	194873850	194874425	575	194874237	32	481	20.7
1	194890050	194890200	150	194890162	31	135	9.9
1	194939300	194939475	175	194939312	32	175	11.7
1	195039025	195039350	325	195039212	50	467	36.9
1	195068800	195069000	200	195068987	38	241	21.6
1	195087075	195087275	200	195087112	39	255	16.2
1	195134375	195134475	100	195134387	16	61	3.6
1	195150425	195150625	200	195150537	25	174	0
1	195393900	195393975	75	195393937	16	45	0
1	195452850	195452875	25	195452862	21	21	1.8
1	195719975	195720375	400	195720062	30	448	56.7
1	195923875	195924050	175	195923887	23	135	8.1
1	195940650	195940850	200	195940737	18	131	0
1	195982700	195982925	225	195982812	25	186	13.5
1	196062250	196062325	75	196062262	15	43	0
1	196288375	196288400	25	196288387	15	15	1.8
1	196314300	196314500	200	196314387	50	307	30.6
1	196329875	196330250	375	196330112	119	1172	72
1	196378650	196378900	250	196378737	19	155	3.6
1	196382875	196383000	125	196382887	25	110	7.2
1	196422100	196422275	175	196422212	19	112	4.5
1	196440450	196440775	325	196440612	57	540	32.4
1	196443625	196444075	450	196443787	60	668	45
1	196447500	196447975	475	196447787	131	1191	31.5
1	196509025	196509150	125	196509137	22	85	5.4
1	196579150	196579275	125	196579262	23	96	8.1
1	196586650	196586675	25	196586662	22	22	1.8
1	196678800	196679175	375	196678987	36	371	21.6
1	196831650	196831825	175	196831762	20	122	1.8
3	3374175	3374300	125	3374187	23	99	5.4
3	5207900	5208100	200	5207962	17	110	2.7
3	5310075	5310175	100	5310087	18	70	4.5
3	5559050	5559100	50	5559062	17	34	3.6
3	8000150	8000250	100	8000212	17	62	3.6
3	8294025	8294175	150	8294062	27	131	8.1
3	8668275	8668450	175	8668387	54	295	27
3	8807425	8807700	275	8807562	26	232	14.4
3	8813925	8814275	350	8814037	29	427	63.9
3	8849200	8849650	450	8849412	212	2158	48.6
3	8871750	8872000	250	8871887	32	238	16.2
3	8969050	8969175	125	8969062	23	101	9
3	8990075	8990175	100	8990137	17	61	4.5
3	9156850	9157300	450	9157037	35	425	45
3	9183325	9183400	75	9183362	16	44	0
3	9385950	9386175	225	9386137	39	259	16.2
3	9464600	9464625	25	9464612	17	17	0
3	9483275	9484025	750	9483437	31	510	42.3
3	9503725	9503875	150	9503737	23	116	17.1
3	9551100	9551250	150	9551112	15	75	9.9
3	9613025	9613425	400	9613187	38	392	13.5
3	9659350	9659500	150	9659462	23	123	18
3	9734200	9734350	150	9734337	25	119	12.6
3	9735275	9735300	25	9735287	15	15	1.8
3	9740300	9740525	225	9740437	24	168	7.2
3	9868325	9868425	100	9868337	24	73	4.5
3	9875550	9875725	175	9875637	21	114	3.6
3	9903425	9903475	50	9903437	17	32	3.6
3	9994875	9995200	325	9994912	19	213	15.3
3	9995650	9995675	25	9995662	22	22	2.7
3	10095250	10095475	225	10095387	33	244	10.8
3	10109225	10109675	450	10109237	22	295	45
3	10140425	10140525	100	10140512	21	71	7.2
3	14625650	14625825	175	14625712	18	111	0
3	14643900	14644075	175	14644037	28	148	14.4
3	14862950	14863300	350	14863137	18	192	26.1
3	15133650	15133850	200	15133662	16	110	0
3	16375225	16375450	225	16375337	29	231	6.3
3	17509650	17509900	250	17509737	25	194	0
3	17808825	17809075	250	17809062	22	247	43.2
3	18247800	18247950	150	18247862	15	83	2.7
3	18398200	18398325	125	18398262	18	75	0.9
3	18887675	18887825	150	18887712	33	179	18
3	19598375	19598525	150	19598512	21	103	5.4
3	19759000	19759400	400	19759187	103	979	32.4
3	19821100	19821250	150	19821112	21	111	9
3	20148950	20149300	350	20149087	49	464	20.7
3	21572350	21572375	25	21572362	16	16	1.8
3	21618650	21618775	125	21618662	17	75	3.6
3	21715425	21715700	275	21715562	29	273	14.4
3	21755300	21755450	150	21755337	15	84	0
3	21825000	21825300	300	21825062	17	220	35.1
3	21858550	21858725	175	21858562	16	111	18
3	21863650	21863925	275	21863737	77	601	20.7
3	21962900	21963200	300	21963087	42	358	33.3
3	21989475	21989650	175	21989487	63	317	21.6
3	22001225	22001275	50	22001262	17	31	1.8
3	22008100	22008400	300	22008287	30	271	7.2
3	22015225	22015700	475	22015662	31	431	44.1
3	22126825	22127325	500	22127187	50	593	44.1
3	22267650	22267800	150	22267787	24	123	13.5
3	26035850	26036125	275	26035962	36	280	3.6
3	26094350	26094550	200	26094437	16	104	5.4
3	26181400	26181600	200	26181462	20	147	0.9
3	26322100	26322300	200	26322162	21	145	0
3	26462150	26462425	275	26462262	26	231	21.6
3	26522425	26522500	75	26522437	15	44	4.5
3	26830250	26830625	375	26830362	87	835	46.8
3	26987275	26987325	50	26987312	15	28	1.8
3	27036125	27036425	300	27036287	27	238	25.2
3	27041900	27041975	75	27041962	15	39	0.9
3	27042250	27042500	250	27042337	41	312	24.3
3	27373875	27374100	225	27373962	24	182	9
3	27764575	27764900	325	27764812	45	409	29.7
3	27798550	27798725	175	27798637	20	116	9.9
3	27902350	27902550	200	27902412	19	131	11.7
3	27957450	27957825	375	27957637	51	500	1.8
3	27960100	27960325	225	27960287	17	126	1.8
3	28054550	28054650	100	28054562	20	66	4.5
3	28090425	28090575	150	28090562	23	108	5.4
3	28129900	28130275	375	28130237	31	332	32.4
3	28155000	28155250	250	28155087	48	367	31.5
3	28169075	28169425	350	28169262	80	705	31.5
3	28212675	28212875	200	28212762	19	127	0
3	28356825	28356975	150	28356862	15	84	3.6
3	28376725	28376825	100	28376787	15	56	1.8
3	28415875	28416025	150	28415912	18	96	5.4
3	28433750	28433925	175	28433837	15	94	2.7
3	28439025	28439150	125	28439062	15	68	4.5
3	28454200	28454300	100	28454212	16	54	3.6
3	28574600	28574925	325	28574762	55	489	32.4
3	28700525	28700825	300	28700712	24	221	8.1
3	28768600	28768650	50	28768637	15	28	0.9
3	28996600	28996650	50	28996612	21	42	3.6
3	30348025	30348200	175	30348062	22	132	2.7
3	30378750	30378950	200	30378912	18	117	0.9
3	30398325	30398475	150	30398362	23	113	5.4
3	30417900	30418000	100	30417912	19	64	3.6
3	30651850	30651975	125	30651862	15	66	6.3
3	30984600	30984725	125	30984637	16	77	7.2
3	31248200	31248325	125	31248287	17	71	8.1
3	31347025	31347325	300	31347162	31	282	33.3
3	31357100	31357625	525	31357512	107	1195	81.9
3	32257875	32258200	325	32257987	38	358	14.4
3	32379450	32379675	225	32379562	19	143	7.2
3	32588500	32588875	375	32588712	41	452	35.1
3	32651500	32651650	150	32651537	23	104	5.4
3	32720925	32721100	175	32721062	16	98	6.3
3	32729200	32729400	200	32729362	19	119	10.8
3	32899975	32900225	250	32900162	25	198	12.6
3	32928350	32928550	200	32928437	29	200	17.1
3	33193425	33193500	75	33193487	17	46	3.6
3	33255250	33255525	275	33255412	25	220	18
3	33499825	33500025	200	33499937	16	109	0.9
3	33632125	33632475	350	33632312	35	325	7.2
3	33991375	33991600	225	33991437	22	152	18.9
3	34272775	34272950	175	34272912	22	124	6.3
3	34603150	34603475	325	34603312	40	352	10.8
3	34632925	34633175	250	34632937	18	179	26.1
3	34633625	34633725	100	34633662	17	60	4.5
3	34635350	34635650	300	34635512	36	347	47.7
3	34636900	34637275	375	34637087	37	396	28.8
3	34657050	34657375	325	34657187	26	263	8.1
3	34700800	34701000	200	34700887	23	149	15.3
3	34818300	34818500	200	34818362	20	128	0
3	34840250	34840375	125	34840262	15	66	3.6
3	34840875	34840900	25	34840887	22	22	2.7
3	34841175	34841200	25	34841187	24	24	2.7
3	34845400	34845775	375	34845587	75	688	9.9
3	34851550	34851700	150	34851562	59	211	22.5
3	34856100	34856225	125	34856112	16	77	9
3	34857900	34858075	175	34857987	16	97	0
3	35029675	35029700	25	35029687	16	16	1.8
3	35141600	35141650	50	35141637	17	32	2.7
3	35280100	35280575	475	35280512	34	588	95.4
3	35294750	35294950	200	35294887	24	141	7.2
3	35333425	35333600	175	35333587	21	113	5.4
3	35340750	35341250	500	35340937	28	407	34.2
3	35343825	35344125	300	35343937	36	327	22.5
3	35416925	35417350	425	35417112	69	806	34.2
3	35531975	35532100	125	35532087	24	84	4.5
3	35532550	35533100	550	35532912	59	724	59.4
3	35545925	35546125	200	35546037	23	147	10.8
3	35597075	35597175	100	35597162	32	97	8.1
3	35711800	35712125	325	35711937	32	302	28.8
3	36257500	36257675	175	36257637	19	118	10.8
3	36543750	36544000	250	36543862	33	252	14.4
3	36673375	36673675	300	36673537	29	271	27
3	36688450	36688575	125	36688512	15	66	3.6
3	36742850	36743275	425	36743087	149	1450	38.7
3	36763675	36763925	250	36763762	25	196	25.2
3	37374300	37374325	25	37374312	30	30	3.6
3	37394875	37394900	25	37394887	15	15	1.8
3	37611775	37611925	150	37611787	15	77	7.2
3	37777525	37777550	25	37777537	22	22	2.7
3	37832450	37832525	75	37832487	20	54	5.4
3	37848575	37848675	100	37848662	15	55	7.2
3	37865625	37865650	25	37865637	18	18	0.9
3	37915250	37915675	425	37915487	70	794	82.8
3	37949875	37949925	50	37949887	19	36	3.6
3	37960675	37961450	775	37960862	41	814	69.3
3	38008325	38008675	350	38008337	17	194	19.8
3	38009125	38009225	100	38009137	15	54	0
3	38051700	38051875	175	38051737	15	93	3.6
3	38067175	38067250	75	38067187	17	44	3.6
3	38074000	38074400	400	38074162	72	746	27
3	38088350	38088500	150	38088462	36	164	18
3	38088750	38088850	100	38088762	23	77	3.6
3	38127050	38127175	125	38127062	28	101	11.7
3	38237125	38237325	200	38237262	19	133	2.7
3	38334800	38335050	250	38334862	29	245	18.9
3	38424075	38424400	325	38424237	45	379	20.7
3	38514075	38514275	200	38514162	24	163	9.9
3	38676600	38676775	175	38676612	24	121	4.5
3	38889350	38889600	250	38889512	51	374	34.2
3	39110525	39110850	325	39110737	31	291	28.8
3	39111375	39111500	125	39111437	16	72	0
3	39652225	39652325	100	39652262	16	63	8.1
3	40312150	40312250	100	40312212	17	61	3.6
3	40779050	40779175	125	40779087	18	74	5.4
3	40791100	40791150	50	40791137	15	27	1.8
3	41118650	41118950	300	41118812	44	377	17.1
3	41179850	41180000	150	41179937	18	90	8.1
3	41294900	41295050	150	41294962	19	105	8.1
3	41474875	41475125	250	41475012	31	235	8.1
3	41505025	41505150	125	41505112	20	81	9
3	41505375	41505800	425	41505437	30	337	2.7
3	41660250	41660375	125	41660312	18	76	2.7
3	41662725	41662850	125	41662762	15	68	4.5
3	41677550	41677825	275	41677687	38	322	18.9
3	41680225	41680500	275	41680337	26	235	6.3
3	41839175	41839250	75	41839187	18	51	3.6
3	43005025	43005200	175	43005137	17	95	2.7
3	44042475	44042625	150	44042537	17	86	1.8
3	45472050	45472350	300	45472162	32	272	21.6
3	45476800	45476875	75	45476812	15	41	2.7
3	49738550	49738850	300	49738687	20	195	0
3	49782675	49782750	75	49782687	15	43	0
3	49796325	49796425	100	49796337	17	62	1.8
3	49853575	49853725	150	49853687	18	85	5.4
3	49865575	49865875	300	49865737	59	490	27.9
3	49962525	49962700	175	49962587	64	378	30.6
3	49964100	49964350	250	49964237	41	314	24.3
3	50110500	50111000	500	50110687	93	1158	75.6
3	50559825	50560000	175	50559887	15	97	0.9
3	50970325	50970450	125	50970412	22	93	1.8
3	50975000	50975150	150	50975012	15	82	0
3	50994050	50994125	75	50994087	16	44	2.7
3	51107600	51107925	325	51107687	61	552	19.8
3	51245050	51245175	125	51245087	26	124	8.1
3	51267650	51267800	150	51267737	16	84	8.1
3	51322500	51322700	200	51322512	33	206	5.4
3	51421175	51421575	400	51421362	126	1145	19.8
3	51503900	51503925	25	51503912	18	18	1.8
3	51598875	51599000	125	51598937	17	74	5.4
3	51627800	51628025	225	51627912	29	220	1.8
3	51648700	51648725	25	51648712	23	23	2.7
3	51789475	51789625	150	51789537	27	135	15.3
3	51827050	51827325	275	51827162	23	190	2.7
3	51877125	51877150	25	51877137	15	15	1.8
3	52095750	52095850	100	52095787	17	66	3.6
3	52176300	52176725	425	52176537	139	1322	34.2
3	52267525	52268000	475	52267762	135	1472	54
3	52284600	52284625	25	52284612	15	15	0.9
3	52350450	52350650	200	52350512	19	135	11.7
3	52531975	52532200	225	52531987	29	193	17.1
3	52751050	52751350	300	52751287	33	305	18.9
3	53252400	53252575	175	53252512	18	95	0
3	53290475	53290550	75	53290512	15	41	2.7
3	53295200	53295400	200	53295312	20	132	5.4
3	53504000	53504200	200	53504187	20	137	13.5
3	53551425	53551800	375	53551637	57	650	30.6
3	53651625	53651900	275	53651737	23	201	19.8
3	54441325	54441450	125	54441387	20	90	9
3	54823100	54823400	300	54823287	17	171	12.6
3	55046950	55047125	175	55046987	27	157	10.8
3	55068375	55068625	250	55068462	64	463	42.3
3	55132550	55132875	325	55132712	30	285	5.4
3	55199825	55200150	325	55199912	20	223	17.1
3	55330375	55330450	75	55330437	19	51	5.4
3	55330975	55331025	50	55331012	17	32	3.6
3	55336475	55336825	350	55336637	38	397	36.9
3	55358900	55359125	225	55358987	33	219	7.2
3	55372300	55372450	150	55372312	25	111	9
3	55441925	55441975	50	55441962	17	29	1.8
3	55503650	55503825	175	55503737	22	138	9
3	55535900	55536150	250	55535912	17	151	10.8
3	55549750	55549775	25	55549762	41	41	4.5
3	55630425	55630525	100	55630437	15	57	4.5
3	55772750	55772850	100	55772812	22	76	0.9
3	55773125	55773150	25	55773137	39	39	2.7
3	55882150	55882350	200	55882212	18	134	0
3	56581950	56582050	100	56581987	15	55	3.6
3	56756500	56757275	775	56756587	22	489	0
3	57043350	57043450	100	57043437	21	79	3.6
3	57050575	57050725	150	57050637	27	142	12.6
3	57692600	57692750	150	57692612	16	89	7.2
3	57739575	57739600	25	57739587	20	20	1.8
3	57935725	57936050	325	57936037	29	322	25.2
3	58160700	58160775	75	58160712	17	44	0.9
3	58223975	58224100	125	58224062	23	95	6.3
3	58516775	58517025	250	58516912	26	204	0
3	58613900	58614000	100	58613912	16	58	2.7
3	58780375	58780475	100	58780437	15	55	0
3	59224275	59224425	150	59224337	24	126	9.9
3	59350700	59350925	225	59350787	25	185	7.2
3	60589200	60589425	225	60589287	21	160	6.3
3	60615800	60615875	75	60615812	16	47	5.4
3	60885925	60885975	50	60885962	15	28	2.7
3	61138275	61138575	300	61138437	41	347	12.6
3	61155000	61155300	300	61155187	53	439	19.8
3	61428450	61428650	200	61428462	26	163	14.4
3	61446050	61446325	275	61446187	26	204	0
3	61451600	61451725	125	61451687	18	76	5.4
3	61452350	61452800	450	61452462	26	384	46.8
3	61484725	61484825	100	61484762	16	55	0
3	62359775	62359975	200	62359812	30	188	22.5
3	62482250	62482350	100	62482337	18	56	4.5
3	62541950	62542450	500	62542287	29	326	13.5
3	62543700	62544175	475	62544037	65	712	28.8
3	62594850	62595025	175	62594987	20	121	15.3
3	63658625	63658925	300	63658762	83	711	40.5
3	65390500	65390675	175	65390637	17	105	9.9
3	65543900	65543975	75	65543962	16	41	4.5
3	65562525	65562900	375	65562712	76	708	61.2
3	65615750	65616050	300	65615912	42	382	59.4
3	65616350	65616400	50	65616362	29	55	5.4
3	65951275	65951350	75	65951287	15	41	2.7
3	65959150	65959550	400	65959387	37	416	41.4
3	66010525	66010725	200	66010587	21	142	3.6
3	66045225	66045325	100	66045262	15	59	2.7
3	66062400	66062500	100	66062462	22	79	8.1
3	66063300	66063525	225	66063412	27	193	19.8
3	66257850	66258175	325	66257987	54	499	7.2
3	66339950	66340100	150	66339962	17	86	3.6
3	66413300	66413825	525	66413562	100	1159	99
3	66568750	66568950	200	66568812	19	143	15.3
3	67538725	67538750	25	67538737	15	15	1.8
3	67670575	67670650	75	67670587	15	44	4.5
3	68209400	68209600	200	68209412	31	203	6.3
3	68583175	68583275	100	68583262	19	70	7.2
3	68594800	68595025	225	68594837	18	129	3.6
3	68651850	68652200	350	68651937	23	310	41.4
3	68660075	68660350	275	68660212	38	317	31.5
3	68664425	68664550	125	68664537	47	151	20.7
3	68671950	68672325	375	68672037	62	588	30.6
3	68683575	68683775	200	68683637	36	225	21.6
3	68912650	68912725	75	68912687	15	43	1.8
3	68928225	68928325	100	68928312	17	60	5.4
3	69092550	69092875	325	69092562	18	160	21.6
3	69132800	69133125	325	69132962	25	252	28.8
3	69214925	69215075	150	69215062	17	94	12.6
3	69263200	69263375	175	69263337	20	109	9.9
3	69378350	69378675	325	69378462	51	510	56.7
3	69405100	69405150	50	69405137	17	31	1.8
3	69494200	69494550	350	69494362	135	1254	58.5
3	69516150	69516400	250	69516237	21	172	0.9
3	69608250	69608500	250	69608362	39	306	36.9
3	69624425	69624450	25	69624437	31	31	3.6
3	69630825	69631050	225	69630987	55	355	27.9
3	69660775	69660825	50	69660787	26	51	5.4
3	69990875	69990925	50	69990887	19	38	3.6
3	70192625	70192725	100	70192712	18	60	2.7
3	70397300	70397525	225	70397462	17	132	3.6
3	73409350	73409425	75	73409387	15	42	2.7
3	73429125	73429500	375	73429312	49	485	7.2
3	75222325	75222525	200	75222387	23	150	6.3
3	75921450	75921650	200	75921587	25	165	10.8
3	76042275	76042325	50	76042312	17	31	1.8
3	76042575	76043000	425	76042612	21	299	43.2
3	78377875	78377975	100	78377937	18	69	0
3	78721325	78721475	150	78721412	25	121	8.1
3	79230000	79230150	150	79230137	17	89	9
3	79373025	79373250	225	79373212	44	266	10.8
3	79502975	79503175	200	79503087	18	121	0
3	79645000	79645200	200	79645037	28	186	18
3	79661600	79661800	200	79661662	16	110	1.8
3	79672800	79672875	75	79672862	17	45	0.9
3	79714600	79714950	350	79714787	20	251	24.3
3	79989800	79989875	75	79989812	20	53	5.4
3	80090825	80091300	475	80091112	62	733	57.6
3	81122800	81122875	75	81122812	15	44	6.3
3	81747475	81747875	400	81747737	44	478	36.9
3	82002125	82002275	150	82002187	16	82	0.9
3	82018425	82018550	125	82018512	17	78	3.6
3	82081925	82082250	325	82082087	42	354	8.1
3	82100050	82100350	300	82100212	22	192	0
3	83141425	83141550	125	83141462	15	68	4.5
3	83162625	83162750	125	83162712	18	85	8.1
3	83572425	83572500	75	83572437	16	42	2.7
3	83604200	83604250	50	83604212	19	38	3.6
3	83662175	83662350	175	83662312	37	236	19.8
3	84066100	84066775	675	84066612	37	594	45
3	84126175	84126375	200	84126337	25	165	14.4
3	84173050	84173100	50	84173062	15	29	2.7
3	84241625	84241850	225	84241812	18	128	9.9
3	84267175	84267325	150	84267187	15	85	1.8
3	84286450	84286800	350	84286687	114	1007	29.7
3	84314275	84314575	300	84314562	19	194	16.2
3	84338800	84339000	200	84338962	22	150	4.5
3	84471650	84471925	275	84471712	17	201	29.7
3	84524000	84524300	300	84524062	21	219	18
3	84733550	84733675	125	84733587	23	93	11.7
3	84900175	84900625	450	84900487	25	290	23.4
3	85024050	85024200	150	85024112	33	169	10.8
3	85202075	85202200	125	85202137	19	85	0
3	85385625	85386225	600	85386037	103	1256	108.9
3	85657300	85657500	200	85657387	21	140	5.4
3	85659725	85659850	125	85659837	44	146	9.9
3	86014025	86014475	450	86014287	70	722	41.4
3	86228375	86228575	200	86228537	23	144	12.6
3	86721900	86722125	225	86722012	38	283	19.8
3	86773700	86773975	275	86773812	54	448	34.2
3	86860675	86860700	25	86860687	17	17	0.9
3	86872875	86873275	400	86873062	49	502	39.6
3	86888950	86889000	50	86888962	29	46	5.4
3	86930950	86931375	425	86931137	89	889	16.2
3	86936475	86936600	125	86936537	18	85	9.9
3	86959050	86959175	125	86959162	24	94	8.1
3	87005800	87005850	50	87005812	15	30	1.8
3	87468750	87468925	175	87468912	18	113	10.8
3	87476850	87477025	175	87476887	18	109	4.5
3	87703050	87703175	125	87703162	16	70	9.9
3	87902750	87902875	125	87902762	22	96	3.6
3	87971525	87971700	175	87971637	42	257	22.5
3	87991950	87992375	425	87992012	61	707	73.8
3	88005475	88005500	25	88005487	17	17	1.8
3	88056800	88057125	325	88057037	24	304	46.8
3	88059925	88060600	675	88060412	139	1422	93.6
3	88068275	88068400	125	88068387	23	100	0
3	88069325	88069350	25	88069337	18	18	1.8
3	88071300	88071675	375	88071487	122	1103	47.7
3	88084750	88085025	275	88084837	40	313	33.3
3	88088050	88088175	125	88088112	20	88	3.6
3	88088575	88088925	350	88088712	46	452	40.5
3	88224350	88224500	150	88224412	26	144	16.2
3	88263550	88264000	450	88263962	43	489	62.1
3	88291450	88291900	450	88291712	30	388	35.1
3	88292175	88292325	150	88292212	17	85	8.1
3	88300250	88300275	25	88300262	16	16	0.9
3	88306100	88306150	50	88306137	19	37	2.7
3	88307550	88307875	325	88307612	76	688	72.9
3	88308275	88308400	125	88308387	24	103	7.2
3	88312075	88312100	25	88312087	15	15	1.8
3	88317475	88317550	75	88317487	17	48	2.7
3	88318150	88318350	200	88318287	60	385	33.3
3	88493075	88493200	125	88493162	18	82	9.9
3	88495800	88495900	100	88495862	16	58	1.8
3	88496175	88496250	75	88496187	22	57	5.4
3	88558900	88559275	375	88559087	110	939	50.4
3	88580725	88580975	250	88580887	51	392	31.5
3	88596025	88596225	200	88596162	50	334	24.3
3	88612425	88612450	25	88612437	15	15	1.8
3	88617400	88618025	625	88617562	61	888	93.6
3	88639325	88639350	25	88639337	18	18	1.8
3	88707450	88707725	275	88707687	19	167	9.9
3	88709575	88709775	200	88709687	34	225	14.4
3	88710275	88710475	200	88710437	49	290	8.1
3	88740575	88740700	125	88740687	18	74	4.5
3	88763500	88763550	50	88763512	17	32	3.6
3	88771325	88771800	475	88771562	27	408	32.4
3	88844025	88844375	350	88844237	107	997	44.1
3	88848350	88848425	75	88848387	16	44	0.9
3	89035925	89036050	125	89036037	15	69	7.2
3	89036825	89036975	150	89036912	21	104	4.5
3	89067600	89067900	300	89067712	24	221	14.4
3	89187800	89188000	200	89187862	17	120	9
3	89311825	89312200	375	89311937	60	692	54
3	89313200	89313650	450	89313387	228	2075	94.5
3	89368200	89368225	25	89368212	17	17	1.8
3	89423625	89423650	25	89423637	22	22	2.7
3	89440775	89440800	25	89440787	16	16	1.8
3	89699950	89700100	150	89699962	16	88	9.9
3	89708725	89708950	225	89708912	46	297	28.8
3	89733425	89733675	250	89733462	23	168	19.8
3	89739050	89739375	325	89739362	26	247	17.1
3	89763750	89763850	100	89763812	18	68	7.2
3	89774875	89775175	300	89775012	32	287	12.6
3	89800825	89800850	25	89800837	19	19	1.8
3	89859200	89859325	125	89859212	20	78	4.5
3	89871325	89871350	25	89871337	21	21	1.8
3	89881775	89881800	25	89881787	16	16	1.8
3	89945000	89945250	250	89945012	45	281	21.6
3	90049225	90049375	150	90049362	20	91	6.3
3	90138475	90138550	75	90138487	15	45	2.7
3	90333850	90334000	150	90333887	16	89	9
3	90340025	90340050	25	90340037	17	17	1.8
3	90378825	90379075	250	90378962	17	156	17.1
3	90476000	90476125	125	90476062	19	84	9
3	90519375	90519725	350	90519562	70	682	58.5
3	90532550	90532625	75	90532587	22	64	5.4
3	90561950	90562250	300	90562062	46	395	27
3	90626975	90627175	200	90627112	22	147	9.9
3	90641950	90642275	325	90642062	29	283	17.1
3	90660675	90660725	50	90660712	17	29	2.7
3	90669875	90670100	225	90669962	27	204	8.1
3	90690375	90690650	275	90690537	44	342	27.9
3	90709500	90709800	300	90709562	29	271	35.1
3	92196775	92197100	325	92196937	28	273	0
3	93640550	93640575	25	93640562	16	16	1.8
3	93682825	93682975	150	93682937	26	144	11.7
3	94395400	94395425	25	94395412	17	17	1.8
3	94457125	94457175	50	94457162	15	27	0.9
3	94489850	94489900	50	94489862	16	31	3.6
3	94541975	94542075	100	94542037	15	55	6.3
3	94569525	94569850	325	94569662	49	448	16.2
3	94922675	94922725	50	94922712	16	29	1.8
3	94923750	94923800	50	94923762	17	33	3.6
3	94972225	94972450	225	94972387	21	162	16.2
3	95088075	95088275	200	95088162	21	143	3.6
3	95139200	95139250	50	95139237	17	32	1.8
3	95196350	95196575	225	95196362	37	262	26.1
3	95313625	95313650	25	95313637	15	15	1.8
3	95367150	95367275	125	95367212	19	89	9
3	95368375	95368600	225	95368387	17	134	4.5
3	95401025	95401150	125	95401037	20	89	9
3	95519575	95520075	500	95519737	29	374	54.9
3	95674050	95674350	300	95674212	35	309	27
3	95710250	95710300	50	95710262	17	33	0
3	95710575	95710825	250	95710687	26	224	14.4
3	95718425	95718500	75	95718437	15	45	4.5
3	95744125	95744325	200	95744137	22	139	26.1
3	95753575	95753725	150	95753612	22	105	8.1
3	95904125	95904225	100	95904187	15	53	1.8
3	96014375	96014825	450	96014562	30	416	39.6
3	96036600	96036775	175	96036737	17	97	3.6
3	96081300	96081525	225	96081412	22	153	12.6
3	96143200	96143350	150	96143337	30	162	17.1
3	96188075	96188300	225	96188137	45	315	21.6
3	96257775	96257800	25	96257787	18	18	1.8
3	96282575	96282625	50	96282612	25	44	3.6
3	96347675	96347900	225	96347737	29	200	12.6
3	96355125	96355325	200	96355137	26	159	19.8
3	96640875	96641100	225	96640937	63	391	25.2
3	96643175	96643375	200	96643287	59	412	30.6
3	96686275	96686500	225	96686437	28	194	14.4
3	96687575	96687625	50	96687587	15	29	1.8
3	96720975	96721050	75	96720987	15	39	2.7
3	97048725	97049100	375	97048937	82	794	44.1
3	97244050	97244150	100	97244137	19	71	3.6
3	97312625	97312800	175	97312712	19	124	11.7
3	97313450	97313550	100	97313512	16	56	2.7
3	97383300	97383500	200	97383362	28	205	23.4
3	97625625	97625900	275	97625762	32	244	4.5
3	97743525	97743725	200	97743637	20	137	14.4
3	97853400	97853425	25	97853412	16	16	1.8
3	97940050	97940400	350	97940237	37	360	13.5
3	98078750	98078925	175	98078812	19	120	6.3
3	98128550	98128875	325	98128612	38	406	5.4
3	98190675	98190725	50	98190687	15	30	3.6
3	98192100	98192425	325	98192212	66	609	56.7
3	98263900	98264200	300	98263962	46	360	14.4
3	98266250	98266400	150	98266337	20	105	9
3	98312775	98312975	200	98312837	35	207	15.3
3	98404600	98404875	275	98404737	85	714	38.7
3	98502875	98502900	25	98502887	25	25	1.8
3	99096825	99097175	350	99096987	105	890	28.8
3	99332425	99332575	150	99332537	21	103	7.2
3	99419625	99419725	100	99419637	21	64	2.7
3	99465950	99466200	250	99466087	32	252	10.8
3	99588275	99588375	100	99588287	19	63	1.8
3	100807050	100807175	125	100807062	17	73	7.2
3	100996125	100996375	250	100996212	21	161	0
3	101011375	101011450	75	101011437	28	60	6.3
3	101098700	101098775	75	101098712	15	45	5.4
3	101342025	101342225	200	101342162	29	204	9.9
3	101403325	101403450	125	101403337	21	89	6.3
3	101424575	101424725	150	101424712	20	104	5.4
3	101495150	101495200	50	101495162	18	34	3.6
3	101533825	101534025	200	101533837	28	158	18
3	101591500	101591525	25	101591512	18	18	1.8
3	101635225	101635600	375	101635437	101	942	81
3	101651450	101651850	400	101651662	38	438	54
3	101690100	101690500	400	101690412	45	443	28.8
3	101706450	101706700	250	101706587	44	343	47.7
3	101727700	101727800	100	101727737	16	62	2.7
3	101729650	101729850	200	101729762	18	118	10.8
3	101830875	101831200	325	101830962	22	224	11.7
3	101895600	101895925	325	101895762	47	424	29.7
3	101936075	101936150	75	101936137	39	107	9.9
3	101996275	101996425	150	101996287	22	106	16.2
3	102026175	102026200	25	102026187	36	36	2.7
3	102241400	102241600	200	102241437	19	137	10.8
3	102254625	102254875	250	102254812	40	322	14.4
3	102288650	102288675	25	102288662	16	16	1.8
3	102323125	102323275	150	102323187	25	135	6.3
3	102574800	102575025	225	102574912	27	198	14.4
3	103108925	103109150	225	103109037	23	171	0
3	103124750	103124900	150	103124762	22	122	13.5
3	103149350	103149375	25	103149362	17	17	0.9
3	103150375	103150400	25	103150387	16	16	1.8
3	103187325	103187400	75	103187387	21	56	4.5
3	103703025	103703125	100	103703037	23	77	8.1
3	103749375	103749475	100	103749412	15	54	3.6
3	103845275	103845775	500	103845487	78	911	54
3	103863300	103863400	100	103863387	21	74	6.3
3	104043100	104043600	500	104043412	82	935	45
3	104448050	104448375	325	104448212	66	578	31.5
3	104571025	104571450	425	104571137	99	970	73.8
3	104640600	104640625	25	104640612	16	16	1.8
3	104640925	104641225	300	104641187	29	256	27.9
3	104830125	104830275	150	104830212	15	79	0.9
3	104945675	104945700	25	104945687	15	15	1.8
3	105120775	105121150	375	105120987	30	328	8.1
3	105121900	105122175	275	105122037	39	328	33.3
3	105181050	105181325	275	105181137	70	549	19.8
3	105183000	105183125	125	105183062	32	146	14.4
3	105186975	105187050	75	105187012	15	42	3.6
3	105206350	105206400	50	105206387	29	55	4.5
3	105339200	105339325	125	105339287	15	68	0
3	105403425	105403525	100	105403462	16	56	3.6
3	105409050	105409350	300	105409212	30	262	23.4
3	105426400	105426575	175	105426462	20	128	5.4
3	105500550	105500625	75	105500587	19	52	5.4
3	105521075	105521275	200	105521137	36	205	18
3	105531800	105532200	400	105531912	43	496	59.4
3	105583050	105583250	200	105583137	25	164	8.1
3	105609300	105609550	250	105609412	28	226	9.9
3	105617725	105618000	275	105617887	40	335	26.1
3	105657150	105657175	25	105657162	24	24	2.7
3	105658825	105659250	425	105659012	120	1279	51.3
3	105667150	105667175	25	105667162	22	22	2.7
3	105713500	105714250	750	105713937	78	979	101.7
3	105745525	105745725	200	105745662	18	130	6.3
3	105815475	105815550	75	105815512	17	48	5.4
3	105834725	105834750	25	105834737	17	17	1.8
3	105838225	105838850	625	105838337	51	883	46.8
3	105839750	105839875	125	105839862	30	103	7.2
3	105911950	105912200	250	105912087	31	219	13.5
3	106022050	106022125	75	106022112	21	52	3.6
3	106023425	106023450	25	106023437	15	15	1.8
3	106087350	106087400	50	106087362	24	46	3.6
3	106675625	106675925	300	106675762	24	228	24.3
3	106849475	106849900	425	106849787	31	364	26.1
3	106850225	106850375	150	106850262	16	87	8.1
3	107241925	107242100	175	107241937	24	142	6.3
3	107462075	107462100	25	107462087	23	23	2.7
3	107477075	107477350	275	107477262	19	182	20.7
3	107539925	107539950	25	107539937	51	51	6.3
3	107559350	107559800	450	107559537	67	787	55.8
3	107561650	107561675	25	107561662	22	22	2.7
3	107619500	107619775	275	107619637	27	244	6.3
3	107652850	107652875	25	107652862	17	17	1.8
3	107674975	107675175	200	107675112	22	138	5.4
3	107759800	107759925	125	107759812	23	101	8.1
3	107824600	107824850	250	107824737	38	299	21.6
3	107972725	107972825	100	107972737	18	64	5.4
3	107977100	107977300	200	107977262	26	170	9.9
3	107978750	107978825	75	107978787	18	51	5.4
3	108015900	108016150	250	108015987	42	319	21.6
3	108059525	108060075	550	108059887	88	1006	47.7
3	108138600	108138700	100	108138612	21	66	3.6
3	108240850	108241025	175	108240937	21	111	0
3	108274300	108274325	25	108274312	23	23	2.7
3	108294725	108294900	175	108294737	31	173	9.9
3	108325075	108325225	150	108325137	21	112	9
3	108338075	108338300	225	108338237	52	338	13.5
3	108338600	108338625	25	108338612	18	18	1.8
3	108410500	108410750	250	108410637	30	231	0
3	108411925	108411950	25	108411937	15	15	1.8
3	108416050	108416275	225	108416137	37	245	21.6
3	108456450	108456775	325	108456587	56	486	12.6
3	108500475	108500575	100	108500512	24	91	10.8
3	108517450	108517475	25	108517462	38	38	2.7
3	108529900	108530050	150	108530037	32	193	27
3	108561525	108561900	375	108561712	235	2185	91.8
3	108682825	108682900	75	108682837	36	90	8.1
3	108690350	108690650	300	108690537	39	342	35.1
3	108695950	108696400	450	108696187	38	472	28.8
3	108699525	108699675	150	108699662	24	118	12.6
3	108719250	108719450	200	108719437	16	91	3.6
3	108849825	108849925	100	108849837	17	63	0.9
3	108968650	108968675	25	108968662	17	17	1.8
3	108986300	108986425	125	108986312	15	71	4.5
3	109007425	109007450	25	109007437	15	15	1.8
3	109089350	109089400	50	109089387	27	51	5.4
3	109138925	109139100	175	109139012	15	97	3.6
3	109251250	109251400	150	109251362	18	109	11.7
3	109307050	109307075	25	109307062	17	17	1.8
3	109426975	109427250	275	109427137	45	346	17.1
3	109435725	109435775	50	109435737	17	32	1.8
3	109468475	109468575	100	109468487	23	68	4.5
3	109559500	109559550	50	109559512	23	45	5.4
3	109597700	109597725	25	109597712	15	15	1.8
3	109856050	109856150	100	109856087	15	52	0
3	110379075	110379100	25	110379087	17	17	1.8
3	111521250	111521450	200	111521337	25	176	9.9
3	113621875	113621950	75	113621937	17	45	2.7
3	113622250	113622400	150	113622262	16	83	2.7
3	115195500	115195750	250	115195587	28	209	10.8
3	115624025	115624100	75	115624037	16	44	3.6
3	115707025	115707075	50	115707037	17	34	3.6
3	115814575	115814750	175	115814612	17	118	15.3
3	115836700	115836900	200	115836762	18	120	3.6
3	115880025	115880050	25	115880037	23	23	2.7
3	115961375	115961500	125	115961387	26	100	5.4
3	116039175	116039250	75	116039212	17	49	5.4
3	116245175	116245200	25	116245187	15	15	1.8
3	116319350	116319425	75	116319412	28	75	6.3
3	116325275	116325550	275	116325387	27	196	0
3	116416175	116416225	50	116416212	32	63	6.3
3	116500175	116500250	75	116500212	18	50	4.5
3	116504975	116505125	150	116505062	19	98	4.5
3	116800000	116800025	25	116800012	15	15	1.8
3	116828100	116828275	175	116828212	18	113	0
3	116956425	116956475	50	116956462	16	31	1.8
3	116958475	116958525	50	116958487	15	27	1.8
3	116960675	116961000	325	116960812	38	366	24.3
3	117155150	117155175	25	117155162	17	17	1.8
3	117818775	117819025	250	117818862	27	231	19.8
3	118435825	118436050	225	118435937	22	148	1.8
3	118618575	118618675	100	118618587	18	66	7.2
3	119141725	119141925	200	119141837	23	154	10.8
3	119325725	119326025	300	119325887	41	332	29.7
3	119354125	119354350	225	119354212	26	198	0
3	119774600	119774700	100	119774612	22	75	4.5
3	120012425	120012625	200	120012537	22	142	0
3	121232375	121232675	300	121232512	29	247	22.5
3	121283625	121283775	150	121283762	25	134	14.4
3	121299600	121299775	175	121299662	18	118	7.2
3	121319600	121319775	175	121319662	19	109	7.2
3	121419075	121419925	850	121419762	94	1298	119.7
3	121481525	121482150	625	121481687	37	540	61.2
3	121492375	121492500	125	121492437	17	81	8.1
3	121498300	121498500	200	121498337	47	277	22.5
3	121601275	121601425	150	121601387	28	146	13.5
3	121628500	121628675	175	121628562	34	183	16.2
3	121635475	121635600	125	121635537	27	120	12.6
3	121692375	121692825	450	121692462	21	302	10.8
3	121698625	121698850	225	121698762	19	146	6.3
3	121770175	121770275	100	121770237	17	60	3.6
3	121782500	121782725	225	121782662	29	196	3.6
3	122038175	122038450	275	122038437	19	161	10.8
3	122114125	122114475	350	122114212	35	407	44.1
3	122144500	122144575	75	122144562	23	61	7.2
3	122266475	122266500	25	122266487	16	16	1.8
3	122284075	122284175	100	122284087	16	58	4.5
3	122284875	122284900	25	122284887	17	17	1.8
3	122285900	122286200	300	122286087	37	357	21.6
3	122405825	122405850	25	122405837	23	23	2.7
3	122412625	122412875	250	122412737	29	225	29.7
3	122422875	122423075	200	122423037	64	375	22.5
3	122453625	122453750	125	122453662	22	101	9
3	122454750	122454900	150	122454762	37	152	13.5
3	122463200	122463475	275	122463337	39	350	35.1
3	122611250	122611325	75	122611262	20	55	2.7
3	122696200	122696475	275	122696362	20	172	9
3	122916125	122916150	25	122916137	15	15	0.9
3	122976925	122976950	25	122976937	15	15	1.8
3	123163525	123163725	200	123163612	16	113	0
3	123321275	123321575	300	123321437	25	219	18
3	123377900	123378100	200	123378087	17	115	8.1
3	123500175	123500400	225	123500362	32	235	24.3
3	125396275	125396375	100	125396287	15	52	3.6
3	126375375	126375500	125	126375387	16	75	3.6
3	126588925	126588950	25	126588937	15	15	1.8
3	126687475	126687975	500	126687712	138	1581	47.7
3	126798150	126798350	200	126798212	22	148	0
3	126986225	126986625	400	126986362	42	414	22.5
3	126990575	126990725	150	126990587	22	105	14.4
3	127009625	127009800	175	127009737	23	131	9
3	127116925	127117050	125	127116962	24	102	9
3	127145500	127145700	200	127145612	29	186	15.3
3	127249625	127249925	300	127249762	61	513	40.5
3	127286225	127286250	25	127286237	17	17	1.8
3	127379275	127379325	50	127379312	17	33	3.6
3	127396350	127396600	250	127396512	23	195	5.4
3	127545350	127545475	125	127545362	27	115	9.9
3	127624650	127624850	200	127624812	19	128	12.6
3	127697675	127697975	300	127697887	25	222	13.5
3	127829600	127829650	50	127829612	17	34	2.7
3	127855525	127855550	25	127855537	16	16	1.8
3	127866425	127866575	150	127866437	18	94	5.4
3	128329125	128329375	250	128329237	74	550	27
3	128538475	128538800	325	128538662	28	256	27.9
3	129524475	129524500	25	129524487	22	22	2.7
3	129528300	129528575	275	129528412	26	218	13.5
3	129604650	129604850	200	129604762	32	196	4.5
3	129642150	129642350	200	129642212	27	160	9.9
3	129823225	129823500	275	129823487	29	218	10.8
3	129893575	129893775	200	129893637	18	123	0
3	130299900	130300250	350	130300087	65	597	39.6
3	130719450	130719525	75	130719512	16	41	4.5
3	130747325	130747500	175	130747437	20	114	8.1
3	131503750	131503775	25	131503762	15	15	1.8
3	132703750	132703850	100	132703812	19	69	0
3	132818300	132818325	25	132818312	15	15	1.8
3	133028600	133028725	125	133028637	15	72	8.1
3	133029225	133029300	75	133029237	30	82	6.3
3	133248000	133248050	50	133248012	16	31	3.6
3	133251900	133251925	25	133251912	16	16	1.8
3	133285000	133285075	75	133285012	16	43	2.7
3	133538100	133538350	250	133538212	25	198	0
3	133692150	133692500	350	133692312	111	1007	22.5
3	134037300	134037325	25	134037312	15	15	1.8
3	134173425	134173700	275	134173437	15	127	21.6
3	134176600	134176725	125	134176612	22	100	11.7
3	134328225	134328650	425	134328512	32	464	50.4
3	134549325	134549550	225	134549437	25	180	3.6
3	134864450	134864575	125	134864562	16	72	2.7
3	135218500	135218675	175	135218512	36	163	14.4
3	135339775	135339925	150	135339837	26	132	9
3	135375200	135375225	25	135375212	16	16	1.8
3	135375500	135375650	150	135375637	26	113	9
3	135375950	135376150	200	135376087	40	273	16.2
3	135454275	135454450	175	135454337	19	112	11.7
3	136102825	136102925	100	136102912	23	66	2.7
3	136547550	136547825	275	136547712	29	232	14.4
3	136681600	136681800	200	136681687	27	174	0.9
3	137087875	137088225	350	137088037	76	646	21.6
3	137126425	137126725	300	137126587	43	342	31.5
3	137352900	137353100	200	137353087	36	218	18
3	137484825	137485225	400	137485037	88	852	36
3	137620900	137621325	425	137621037	76	723	51.3
3	137674825	137675175	350	137674987	80	713	20.7
3	137690500	137690550	50	137690512	17	33	3.6
3	137801900	137801950	50	137801912	21	41	2.7
3	137803050	137803250	200	137803137	22	145	7.2
3	137928650	137928800	150	137928787	15	78	4.5
3	138081350	138081375	25	138081362	26	26	2.7
3	138380050	138380075	25	138380062	15	15	1.8
3	138452975	138453200	225	138453062	22	159	10.8
3	138465325	138465450	125	138465337	24	117	13.5
3	138582725	138582900	175	138582887	28	156	7.2
3	138721775	138722175	400	138721987	23	286	21.6
3	138738500	138738525	25	138738512	23	23	2.7
3	138741075	138741500	425	138741287	48	616	34.2
3	138797225	138797275	50	138797237	18	33	3.6
3	138798500	138798575	75	138798562	20	49	1.8
3	138843000	138843350	350	138843162	65	540	18
3	139740525	139740675	150	139740562	17	97	0
3	141402200	141402300	100	141402287	15	54	2.7
3	141869075	141869175	100	141869087	29	99	9
3	141870450	141870650	200	141870512	21	150	6.3
3	141874000	141874025	25	141874012	15	15	1.8
3	141939650	141939875	225	141939737	23	176	4.5
3	142106725	142106875	150	142106862	18	96	4.5
3	142247850	142248175	325	142248037	46	434	22.5
3	142248475	142248675	200	142248612	21	143	9.9
3	142255525	142255950	425	142255712	137	1303	40.5
3	142333175	142333350	175	142333212	38	200	26.1
3	142371575	142371750	175	142371737	37	204	24.3
3	142436350	142436475	125	142436437	29	119	11.7
3	142465550	142465650	100	142465637	16	56	3.6
3	142478625	142478775	150	142478662	17	90	5.4
3	142498225	142498375	150	142498237	37	153	19.8
3	142526300	142526575	275	142526437	26	214	2.7
3	142554750	142554925	175	142554862	18	101	5.4
3	142702425	142702650	225	142702562	26	208	16.2
3	143095900	143096200	300	143096037	30	268	9
3	143852025	143852325	300	143852212	19	191	6.3
3	143887150	143887550	400	143887362	45	520	24.3
3	144045225	144045350	125	144045262	34	130	11.7
3	144061775	144062175	400	144061912	120	1134	88.2
3	144142975	144143150	175	144143012	26	134	12.6
3	144507900	144508275	375	144508162	24	279	38.7
3	144554550	144554625	75	144554562	20	58	5.4
3	144580875	144580950	75	144580912	17	44	3.6
3	144581725	144581850	125	144581787	20	89	9
3	144656100	144656375	275	144656262	25	188	5.4
3	144656950	144656975	25	144656962	15	15	1.8
3	145056025	145056150	125	145056062	19	87	8.1
3	145111925	145112200	275	145112062	29	235	6.3
3	145585600	145585700	100	145585612	16	60	3.6
3	145586750	145587375	625	145587287	31	449	45
3	145695900	145695925	25	145695912	16	16	1.8
3	145696200	145696300	100	145696237	16	57	5.4
3	145696875	145697000	125	145696962	17	78	6.3
3	145744025	145744125	100	145744037	21	75	8.1
3	145754675	145754800	125	145754787	28	110	9.9
3	145827900	145828100	200	145827912	26	170	6.3
3	145831600	145831875	275	145831762	30	262	19.8
3	145861525	145861550	25	145861537	15	15	0.9
3	145897225	145897525	300	145897362	29	256	11.7
3	146387725	146387825	100	146387812	22	70	6.3
3	146544950	146544975	25	146544962	17	17	0.9
3	146558175	146558525	350	146558337	22	254	22.5
3	146703725	146703850	125	146703737	18	77	5.4
3	146721150	146721325	175	146721312	19	102	3.6
3	147019850	147019975	125	147019912	16	75	4.5
3	147335825	147336125	300	147335987	39	329	8.1
3	147864775	147864950	175	147864812	16	103	10.8
3	148186025	148186100	75	148186087	25	63	1.8
3	148281275	148281550	275	148281387	34	270	9
3	148366450	148366575	125	148366512	15	67	0.9
3	148927900	148927975	75	148927912	16	47	3.6
3	148980175	148980275	100	148980187	22	78	8.1
3	149156925	149157050	125	149156962	15	69	0
3	149233400	149233550	150	149233487	20	103	3.6
3	149251650	149251875	225	149251737	20	127	8.1
3	149322825	149322975	150	149322912	24	121	8.1
3	151699850	151700000	150	151699887	15	85	0.9
3	151829125	151829400	275	151829262	22	185	3.6
3	151851325	151851450	125	151851437	18	78	4.5
3	152046425	152046550	125	152046537	17	79	2.7
3	152093225	152093275	50	152093237	16	30	2.7
3	152147350	152147825	475	152147637	117	1181	18.9
3	152196950	152197050	100	152197037	16	58	5.4
3	152333800	152334050	250	152333937	18	155	8.1
3	152432125	152432325	200	152432187	33	225	17.1
3	152936350	152936550	200	152936512	23	147	4.5
3	153015900	153016025	125	153015912	17	76	6.3
3	153022700	153022900	200	153022812	24	152	18
3	153214875	153215150	275	153215012	21	185	9
3	153410400	153410600	200	153410437	27	172	7.2
3	153599400	153599450	50	153599437	31	61	7.2
3	153850175	153850200	25	153850187	15	15	1.8
3	154321225	154321425	200	154321262	23	148	12.6
3	154588475	154588550	75	154588487	15	43	1.8
3	154627450	154627950	500	154627712	94	1092	81
3	154742000	154742200	200	154742112	31	185	14.4
3	154780800	154780825	25	154780812	15	15	1.8
3	155287875	155287925	50	155287887	18	36	2.7
3	155964200	155964400	200	155964312	17	111	0
3	156167500	156167625	125	156167512	20	88	5.4
3	156235275	156235725	450	156235362	22	211	1.8
3	156496100	156496125	25	156496112	17	17	1.8
3	156855975	156856225	250	156856112	46	352	16.2
3	157055350	157055525	175	157055512	17	117	14.4
3	157144275	157144425	150	157144412	37	140	3.6
3	157469400	157469425	25	157469412	16	16	0.9
3	157966975	157967175	200	157967062	26	174	9
3	157971975	157972000	25	157971987	25	25	2.7
3	158946575	158946700	125	158946687	17	74	8.1
3	158967050	158967125	75	158967062	15	45	5.4
3	159775550	159775600	50	159775562	18	35	3.6
3	159787300	159787575	275	159787412	37	298	5.4
[truncated: 14,686 more rows]

## Sheet: BRN2 NPC
CHROM	START	END	LENGTH	PEAK POS	PEAK HEIGHT	TOTAL TARGET COUNTS	TOTAL BACKGROUND COUNTS
1	3194250	3194275	25	3194262	11	11	1.6
1	3282375	3282475	100	3282437	14	52	0
1	3489175	3489475	300	3489312	32	281	0
1	5013100	5013325	225	5013137	27	202	18.8
1	7129050	7129375	325	7129212	25	233	0
1	7194800	7194900	100	7194862	12	45	6.3
1	9549700	9549975	275	9549862	25	216	31.3
1	9613000	9613050	50	9613037	12	23	3.1
1	9615725	9615750	25	9615737	12	12	0.8
1	10923775	10923975	200	10923862	15	107	0
1	11030525	11030800	275	11030662	41	317	0
1	12630050	12630175	125	12630062	15	69	11.7
1	13221050	13221075	25	13221062	11	11	0.8
1	13923675	13923725	50	13923687	11	22	1.6
1	14095650	14095900	250	14095787	24	193	5.5
1	14166425	14166700	275	14166537	35	277	21.1
1	14184250	14184525	275	14184337	26	228	9.4
1	14277225	14277750	525	14277587	30	378	40.7
1	16197850	16198225	375	16198037	43	401	18
1	16285575	16285700	125	16285637	14	64	4.7
1	17045150	17045300	150	17045237	15	78	3.9
1	17576575	17576825	250	17576737	23	164	0
1	17823775	17823875	100	17823787	13	49	2.3
1	21396575	21396975	400	21396787	151	1340	20.3
1	21790150	21790550	400	21790362	84	817	18.8
1	21815175	21815375	200	21815337	23	147	7
1	22251550	22251875	325	22251687	47	417	3.1
1	23051500	23051525	25	23051512	11	11	0
1	23169875	23169975	100	23169887	13	50	0
1	24126750	24126950	200	24126887	18	115	14.1
1	24953600	24953825	225	24953687	21	160	10.2
1	25419125	25419300	175	25419212	21	134	14.9
1	25448925	25448950	25	25448937	13	13	2.3
1	25521225	25521275	50	25521237	12	24	0
1	25836975	25837225	250	25837137	22	176	14.1
1	25837600	25837750	150	25837662	12	66	3.9
1	29017925	29017975	50	29017937	11	22	0
1	30529500	30529600	100	30529537	13	50	0
1	30804600	30804650	50	30804612	12	24	1.6
1	31046275	31046475	200	31046362	17	115	3.1
1	31047650	31047750	100	31047712	19	68	11
1	32987150	32987200	50	32987162	11	22	0.8
1	33439400	33439800	400	33439537	46	426	34.4
1	33955600	33955625	25	33955612	14	14	2.3
1	34609750	34609875	125	34609862	18	67	9.4
1	34610100	34610225	125	34610112	18	72	11
1	35530500	35530625	125	35530562	16	68	9.4
1	35550025	35550225	200	35550112	18	122	3.1
1	36254325	36254425	100	36254337	12	47	9.4
1	37338025	37338050	25	37338037	16	16	3.1
1	37509900	37510325	425	37510087	76	732	29
1	37834925	37834975	50	37834937	13	25	3.9
1	39311875	39312075	200	39311987	21	134	18.8
1	39388050	39388375	325	39388237	31	280	14.9
1	39691375	39691450	75	39691412	15	40	7
1	39706175	39706400	225	39706287	18	142	0.8
1	39783500	39783650	150	39783512	12	69	0.8
1	40186475	40186700	225	40186587	29	198	15.7
1	40553125	40553400	275	40553287	34	244	20.3
1	40734450	40734800	350	40734612	43	381	6.3
1	40769325	40769400	75	40769337	15	45	6.3
1	40972200	40972450	250	40972287	24	192	20.3
1	41334625	41335075	450	41334787	27	347	27.4
1	41550350	41550600	250	41550437	24	179	7.8
1	41596350	41596500	150	41596387	15	80	3.1
1	41597450	41597475	25	41597462	11	11	1.6
1	41832900	41832925	25	41832912	16	16	3.1
1	42486175	42486350	175	42486212	16	93	5.5
1	42636350	42636450	100	42636412	12	45	6.3
1	42638450	42638525	75	42638512	17	40	5.5
1	42857275	42857575	300	42857437	34	288	4.7
1	43084200	43084325	125	43084287	13	56	3.9
1	43261825	43261850	25	43261837	11	11	1.6
1	43282900	43283025	125	43282912	12	58	3.9
1	43597775	43598000	225	43597912	20	137	5.5
1	43767975	43768175	200	43768112	28	185	24.3
1	43984275	43984475	200	43984387	17	113	5.5
1	44966725	44966950	225	44966837	22	150	0
1	46799150	46799225	75	46799162	13	37	0
1	51021000	51021125	125	51021037	16	73	12.5
1	51059525	51059875	350	51059687	20	221	5.5
1	51238075	51238150	75	51238137	12	34	0
1	51345250	51345325	75	51345287	12	34	0
1	52662725	52662950	225	52662912	22	147	12.5
1	52896075	52896450	375	52896262	112	938	5.5
1	53768350	53768550	200	53768387	20	149	7
1	54429575	54429800	225	54429637	17	136	0
1	54530100	54530300	200	54530187	14	101	2.3
1	54659625	54659875	250	54659737	23	172	0
1	54873100	54873300	200	54873187	21	129	4.7
1	55165950	55166050	100	55166037	13	46	7
1	55451725	55451775	50	55451762	14	25	1.6
1	55793375	55793775	400	55793587	70	646	9.4
1	56675900	56675975	75	56675912	11	33	0
1	56909950	56910200	250	56910062	38	276	34.4
1	57156275	57156625	350	57156437	82	711	9.4
1	57171375	57171625	250	57171512	32	254	17.2
1	57322900	57322925	25	57322912	11	11	1.6
1	57332375	57332725	350	57332562	71	632	12.5
1	57374200	57374525	325	57374387	79	647	20.3
1	57806625	57807000	375	57806812	105	934	24.3
1	58143250	58143425	175	58143337	18	100	7
1	58562100	58562200	100	58562137	14	52	0
1	59382475	59382875	400	59382662	310	2694	21.9
1	59716300	59716525	225	59716412	21	150	3.1
1	59733700	59733725	25	59733712	11	11	0
1	60124900	60124925	25	60124912	11	11	0.8
1	60791375	60791650	275	60791487	27	211	1.6
1	60875775	60876175	400	60875962	108	962	0
1	60933800	60934075	275	60933937	37	306	0
1	61089950	61090275	325	61090112	51	440	11
1	61090825	61091050	225	61090912	21	161	14.1
1	61142600	61142825	225	61142637	16	124	0
1	61181350	61181725	375	61181537	102	869	7
1	61487650	61487825	175	61487687	32	172	15.7
1	61847575	61847600	25	61847587	12	12	0
1	61932175	61932325	150	61932237	15	78	1.6
1	62203325	62203375	50	62203337	11	22	0
1	62529900	62530000	100	62529962	16	58	7
1	63697600	63697725	125	63697687	13	61	3.9
1	63698450	63698475	25	63698462	12	12	1.6
1	63754150	63754325	175	63754212	15	95	7.8
1	63762875	63762900	25	63762887	11	11	0
1	63832750	63832875	125	63832762	11	51	2.3
1	64123950	64124025	75	64123962	19	48	7.8
1	64133050	64133450	400	64133237	161	1417	22.7
1	64135775	64135800	25	64135787	11	11	1.6
1	64155075	64155150	75	64155112	12	34	4.7
1	64380250	64380450	200	64380412	38	214	29
1	64417100	64417200	100	64417162	14	50	1.6
1	64773650	64773800	150	64773787	12	63	0.8
1	64788000	64788025	25	64788012	11	11	1.6
1	65113775	65113875	100	65113812	14	50	3.1
1	66128550	66128575	25	66128562	11	11	1.6
1	66161475	66161525	50	66161512	13	25	4.7
1	66242525	66242750	225	66242662	20	144	1.6
1	66254875	66255000	125	66254987	33	118	15.7
1	66303450	66303675	225	66303537	21	147	5.5
1	66319975	66320300	325	66320137	38	337	20.3
1	66622550	66622925	375	66622737	42	423	31.3
1	66626000	66626100	100	66626012	12	45	3.9
1	67299825	67299925	100	67299887	14	50	0
1	68906875	68907275	400	68907062	109	986	7
1	69090525	69090925	400	69090737	95	898	11.7
1	70199150	70199450	300	70199287	38	321	6.3
1	70313375	70313400	25	70313387	12	12	2.3
1	70408750	70409125	375	70408937	20	224	12.5
1	70843450	70843825	375	70843637	86	750	9.4
1	71423325	71423650	325	71423487	55	464	2.3
1	71613675	71613700	25	71613687	11	11	0.8
1	71966950	71966975	25	71966962	11	11	0
1	72159725	72159775	50	72159737	12	23	1.6
1	72177475	72177550	75	72177487	12	35	2.3
1	72188325	72188700	375	72188512	134	1201	36.8
1	72631975	72632075	100	72632012	14	52	7
1	72650300	72650325	25	72650312	11	11	1.6
1	72760875	72761175	300	72761037	41	355	33.6
1	72768400	72768425	25	72768412	11	11	0
1	73576050	73576300	250	73576112	21	153	18.8
1	74044750	74044775	25	74044762	16	16	3.1
1	74101325	74101500	175	74101437	17	104	1.6
1	74244700	74244975	275	74244887	37	277	0
1	74471925	74472050	125	74471937	12	59	10.2
1	74758025	74758200	175	74758062	22	128	14.9
1	74955350	74955675	325	74955537	22	209	15.7
1	75444800	75444875	75	75444812	11	32	4.7
1	76039225	76039525	300	76039337	31	251	3.1
1	76525950	76526075	125	76526012	15	67	9.4
1	76689850	76689925	75	76689862	12	35	0
1	76964050	76964250	200	76964137	24	156	25
1	76976825	76977200	375	76977012	61	569	4.7
1	77380225	77380525	300	77380362	41	351	26.6
1	77416100	77416250	150	77416137	17	87	2.3
1	78238500	78238725	225	78238612	24	179	16.4
1	78640275	78640475	200	78640387	19	114	17.2
1	78731500	78731800	300	78731612	71	560	34.4
1	79333125	79333475	350	79333312	28	270	10.2
1	79478175	79478225	50	79478187	17	30	2.3
1	79739700	79740050	350	79739887	72	668	39.9
1	79740275	79740300	25	79740287	11	11	0.8
1	79898650	79898775	125	79898762	13	56	7.8
1	79902675	79902750	75	79902687	11	32	0
1	79987075	79987475	400	79987287	278	2376	2.3
1	80116475	80116775	300	80116612	33	283	5.5
1	80600375	80600425	50	80600387	11	22	1.6
1	80922325	80922450	125	80922337	12	56	0
1	81473300	81473500	200	81473362	20	130	10.2
1	81766100	81766200	100	81766162	13	49	3.9
1	82208650	82209100	450	82208837	42	463	0
1	82355400	82355575	175	82355462	14	90	5.5
1	82603900	82603925	25	82603912	11	11	0.8
1	84034275	84034675	400	84034487	125	1113	16.4
1	84698575	84698600	25	84698587	11	11	1.6
1	87748250	87748450	200	87748337	14	98	8.6
1	87800675	87801100	425	87800912	223	2016	21.9
1	87943925	87944125	200	87944037	17	118	6.3
1	88269700	88269900	200	88269812	20	125	14.1
1	88583125	88583550	425	88583262	25	324	16.4
1	88776675	88776750	75	88776687	16	41	7
1	88853325	88853350	25	88853337	12	12	2.3
1	89081700	89081825	125	89081787	15	66	10.2
1	89145100	89145250	150	89145137	16	84	2.3
1	89617825	89617875	50	89617837	12	24	4.7
1	89711175	89711200	25	89711187	17	17	3.1
1	90118700	90119025	325	90118862	65	547	33.6
1	90305675	90305925	250	90305812	24	180	25
1	90309275	90309625	350	90309462	29	293	17.2
1	90489650	90489675	25	90489662	12	12	1.6
1	90640975	90641000	25	90640987	11	11	1.6
1	90671325	90671425	100	90671337	12	48	6.3
1	90795225	90795625	400	90795412	180	1543	0
1	90834925	90835350	425	90835137	385	3271	4.7
1	90866200	90866475	275	90866362	28	208	0
1	91581850	91582025	175	91581862	13	89	3.1
1	91707650	91707850	200	91707737	15	99	1.6
1	92122150	92122250	100	92122212	12	46	2.3
1	92803575	92803750	175	92803687	15	94	2.3
1	92805400	92805575	175	92805487	16	101	6.3
1	92806300	92806675	375	92806537	55	517	21.1
1	92892925	92893025	100	92892962	15	53	9.4
1	93007500	93007525	25	93007512	12	12	2.3
1	93037650	93037725	75	93037662	12	36	4.7
1	93039925	93039975	50	93039962	13	25	4.7
1	93040225	93040425	200	93040287	29	179	26.6
1	93288625	93288700	75	93288687	24	63	11.7
1	93290000	93290125	125	93290087	18	77	8.6
1	93353375	93353400	25	93353387	11	11	1.6
1	93356250	93356725	475	93356412	96	980	26.6
1	93370825	93371075	250	93370962	19	158	7
1	93378100	93378200	100	93378137	12	45	3.1
1	93388050	93388300	250	93388137	19	152	7.8
1	93845850	93845975	125	93845887	14	63	0
1	93930700	93930950	250	93930812	24	197	18.8
1	93967750	93967950	200	93967812	24	166	29.7
1	94094550	94094925	375	94094737	62	559	29
1	94190675	94190925	250	94190837	42	297	22.7
1	94443625	94443925	300	94443762	23	192	4.7
1	94568275	94568550	275	94568412	32	264	18
1	94573225	94573575	350	94573362	63	562	17.2
1	96243375	96243650	275	96243537	45	350	34.4
1	96334275	96334475	200	96334312	13	100	9.4
1	97498400	97498425	25	97498412	14	14	2.3
1	99384275	99384300	25	99384287	12	12	2.3
1	99460700	99460900	200	99460762	13	96	0
1	99633125	99633175	50	99633162	15	27	0
1	99693300	99693875	575	99693662	39	487	9.4
1	99735500	99735725	225	99735612	25	173	10.2
1	106574550	106574675	125	106574562	14	67	8.6
1	106595875	106596025	150	106595987	28	153	20.3
1	106599525	106599925	400	106599737	100	908	11.7
1	106665800	106666200	400	106665987	32	338	31.3
1	106740225	106740275	50	106740237	11	22	0
1	107983125	107983275	150	107983162	12	68	3.1
1	107998950	107999350	400	107999162	154	1440	60.3
1	108000925	108001075	150	108000987	13	74	6.3
1	108027225	108027475	250	108027362	22	174	9.4
1	108029525	108029600	75	108029562	12	35	2.3
1	108068650	108068850	200	108068712	19	131	21.9
1	108154125	108154175	50	108154137	11	22	2.3
1	108230775	108231125	350	108230962	27	287	10.2
1	108430550	108430600	50	108430562	12	24	1.6
1	108542300	108542500	200	108542362	22	138	6.3
1	108697725	108697875	150	108697737	11	65	6.3
1	109929850	109930125	275	109930037	18	161	2.3
1	113639500	113639750	250	113639587	34	238	0
1	114081050	114081350	300	114081162	47	396	6.3
1	115185875	115185975	100	115185887	16	64	11
1	115244400	115244625	225	115244512	20	131	12.5
1	116061900	116062025	125	116061912	12	59	0
1	117612300	117612650	350	117612462	48	425	0
1	120471625	120471725	100	120471662	15	54	2.3
1	120683100	120683250	150	120683187	15	77	4.7
1	120877400	120877675	275	120877537	26	214	13.3
1	121084325	121084650	325	121084462	56	486	29.7
1	121216175	121216550	375	121216362	178	1514	50.9
1	121279300	121279500	200	121279387	15	102	1.6
1	121348650	121348800	150	121348712	18	99	15.7
1	121782450	121782475	25	121782462	11	11	0
1	122014700	122014925	225	122014812	19	137	4.7
1	122914725	122915050	325	122914837	38	346	49.3
1	127291225	127291425	200	127291312	19	130	6.3
1	127467225	127467575	350	127467387	35	323	20.3
1	127858300	127858575	275	127858437	27	200	11
1	127956825	127956950	125	127956887	13	61	7.8
1	128175875	128175950	75	128175912	13	37	2.3
1	128350825	128351150	325	128351012	30	249	0
1	128511875	128511900	25	128511887	12	12	0
1	129750350	129750550	200	129750362	31	171	31.3
1	130232750	130232875	125	130232862	14	64	4.7
1	130325675	130325725	50	130325687	12	23	0.8
1	132562150	132562300	150	132562162	24	113	14.1
1	132964750	132965075	325	132964937	51	443	18.8
1	133259550	133259725	175	133259637	15	93	13.3
1	133301300	133301425	125	133301312	11	53	3.1
1	133310625	133310975	350	133310812	79	684	32.9
1	133694650	133694675	25	133694662	11	11	0.8
1	133992375	133992575	200	133992487	23	151	18
1	134049650	134050125	475	134049912	621	5507	73.6
1	134350525	134350925	400	134350737	286	2544	94.7
1	134671525	134671925	400	134671587	19	214	25
1	134867075	134867200	125	134867112	16	72	8.6
1	134957200	134957300	100	134957212	12	46	3.1
1	135680375	135680400	25	135680387	11	11	0.8
1	135896400	135896425	25	135896412	11	11	0.8
1	135913100	135913125	25	135913112	11	11	1.6
1	135915650	135915850	200	135915787	15	95	1.6
1	135984450	135984675	225	135984537	33	230	39.1
1	136005450	136005575	125	136005512	16	76	10.2
1	137958925	137959225	300	137959037	27	241	19.6
1	138148200	138148625	425	138148412	225	2156	75.1
1	139195075	139195150	75	139195112	13	36	3.9
1	139473100	139473175	75	139473112	11	32	0
1	139655825	139655900	75	139655887	13	35	0.8
1	139714350	139714625	275	139714437	25	193	0
1	139717500	139717550	50	139717512	11	22	1.6
1	139745100	139745175	75	139745162	13	37	6.3
1	139861125	139861150	25	139861137	11	11	0.8
1	139965425	139965450	25	139965437	11	11	1.6
1	141026325	141026350	25	141026337	12	12	2.3
1	141162900	141163225	325	141163087	17	172	32.9
1	141163625	141163700	75	141163637	14	39	3.1
1	142920350	142920475	125	142920437	14	63	3.1
1	144914850	144914975	125	144914862	14	65	0
1	144962175	144962200	25	144962187	11	11	0
1	145959975	145960075	100	145960012	15	52	3.1
1	146061900	146062100	200	146062012	19	130	1.6
1	148306875	148306950	75	148306912	13	38	0.8
1	148444525	148444725	200	148444537	15	98	1.6
1	148606250	148606325	75	148606262	11	33	0.8
1	148606575	148606650	75	148606612	14	40	4.7
1	148862675	148862850	175	148862812	17	102	0
1	148949425	148949850	425	148949637	302	2688	0
1	150331375	150331500	125	150331437	13	61	6.3
1	152523325	152523450	125	152523362	18	73	3.1
1	152529125	152529175	50	152529137	12	23	1.6
1	152569175	152569275	100	152569237	13	50	6.3
1	152636325	152636375	50	152636337	12	24	3.1
1	152930000	152930025	25	152930012	14	14	2.3
1	153388925	153388975	50	153388937	12	24	1.6
1	153394325	153394475	150	153394337	13	76	9.4
1	153624650	153624775	125	153624737	18	80	1.6
1	153643525	153643825	300	153643637	28	252	11
1	153737275	153737300	25	153737287	11	11	1.6
1	153746250	153746575	325	153746437	24	212	0
1	153927575	153927975	400	153927787	77	779	21.1
1	153951075	153951100	25	153951087	16	16	3.1
1	154218075	154218300	225	154218212	22	162	18
1	154230850	154230900	50	154230862	12	23	3.1
1	154529625	154529900	275	154529762	40	315	2.3
1	154579750	154579875	125	154579762	12	53	0.8
1	154773750	154773950	200	154773837	21	133	15.7
1	154800000	154800150	150	154800087	17	86	6.3
1	155235100	155235150	50	155235112	11	22	0
1	155242675	155242850	175	155242787	17	96	0
1	157577700	157577750	50	157577737	13	24	3.1
1	158834150	158834175	25	158834162	12	12	2.3
1	158876350	158876675	325	158876487	56	520	24.3
1	159119000	159119200	200	159119087	18	122	8.6
1	159853500	159853600	100	159853512	12	47	3.1
1	160064125	160064250	125	160064187	13	61	8.6
1	160193600	160193850	250	160193737	24	186	13.3
1	160223700	160223900	200	160223762	20	142	0
1	160272875	160273075	200	160272962	20	127	6.3
1	160300650	160300975	325	160300837	40	364	44.6
1	161250100	161250375	275	161250237	26	215	20.3
1	161252300	161252600	300	161252487	60	487	28.2
1	161330650	161330825	175	161330787	18	114	16.4
1	161597675	161597825	150	161597712	17	90	3.9
1	161611650	161611875	225	161611762	24	169	5.5
1	162126900	162127000	100	162126962	15	53	4.7
1	162188600	162188900	300	162188762	39	303	32.9
1	162278375	162278650	275	162278562	53	411	40.7
1	162871825	162871850	25	162871837	24	24	4.7
1	162872100	162872125	25	162872112	11	11	0.8
1	163281750	163281925	175	163281837	16	99	8.6
1	163813200	163813250	50	163813212	11	22	3.1
1	163916575	163916650	75	163916587	12	34	3.1
1	163918825	163918950	125	163918837	14	59	5.5
1	163944800	163945150	350	163944962	50	460	26.6
1	164130875	164131100	225	164130987	17	112	11.7
1	164407850	164408050	200	164407887	14	101	0
1	165089100	165089350	250	165089262	20	164	9.4
1	165094025	165094225	200	165094112	21	153	11.7
1	165116775	165117125	350	165116962	39	354	6.3
1	165174600	165174675	75	165174612	12	33	1.6
1	165174950	165174975	25	165174962	12	12	0
1	165181400	165181525	125	165181487	14	62	0
1	165260350	165260600	250	165260487	22	168	7.8
1	166234325	166234475	150	166234462	15	79	0.8
1	166824875	166825050	175	166824962	15	86	10.2
1	167750750	167751025	275	167750862	37	306	7.8
1	167771250	167772125	875	167771837	194	1979	24.3
1	167792225	167792325	100	167792287	14	54	0
1	168080950	168081325	375	168081137	62	580	12.5
1	169049100	169049125	25	169049112	12	12	1.6
1	169118825	169119125	300	169118962	34	272	23.5
1	169904900	169905125	225	169904987	30	208	14.1
1	170195550	170195625	75	170195612	16	39	7.8
1	170386750	170387050	300	170386912	22	191	13.3
1	170406600	170406850	250	170406787	23	179	3.9
1	170597100	170597225	125	170597137	12	55	0.8
1	170930325	170930475	150	170930412	13	71	11
1	171321800	171322225	425	171321987	231	2114	15.7
1	171677825	171677875	50	171677837	11	22	1.6
1	172203900	172204275	375	172204087	48	438	14.9
1	172261375	172261475	100	172261387	27	72	10.2
1	172541675	172542075	400	172541862	54	533	22.7
1	172870525	172870575	50	172870537	12	24	3.1
1	172875200	172875300	100	172875212	11	44	2.3
1	173216525	173216850	325	173216687	49	417	48.5
1	173277225	173277400	175	173277262	14	94	7.8
1	173340075	173340100	25	173340087	11	11	0.8
1	173652600	173652650	50	173652612	11	22	1.6
1	174057075	174057150	75	174057112	14	38	0
1	174146450	174146475	25	174146462	13	13	2.3
1	174147075	174147175	100	174147112	15	53	4.7
1	174186525	174186725	200	174186662	42	260	37.6
1	176359025	176359375	350	176359187	18	210	22.7
1	176608800	176608825	25	176608812	11	11	0
1	176965325	176965375	50	176965337	11	22	1.6
1	177025025	177025225	200	177025112	16	102	7.8
1	177246675	177246825	150	177246687	12	64	8.6
1	177912025	177912175	150	177912087	16	83	6.3
1	178154425	178154700	275	178154562	37	287	5.5
1	178650575	178650625	50	178650612	14	26	3.9
1	178823750	178823850	100	178823787	14	54	3.9
1	178851075	178851175	100	178851087	13	47	6.3
1	179012100	179012550	450	179012337	88	898	11.7
1	179025650	179025700	50	179025662	13	24	3.9
1	179038175	179038425	250	179038337	23	162	10.2
1	179175325	179175725	400	179175537	101	910	33.6
1	179248075	179248600	525	179248537	19	246	26.6
1	179459875	179459900	25	179459887	12	12	0
1	179477275	179477525	250	179477387	39	302	21.9
1	180153000	180153150	150	180153087	17	85	1.6
1	180557750	180558125	375	180557937	64	600	12.5
1	180651075	180651250	175	180651187	17	96	2.3
1	180997225	180997300	75	180997237	11	33	0
1	181086350	181086650	300	181086537	34	279	0
1	181098600	181098750	150	181098637	14	71	7.8
1	181945475	181945775	300	181945612	40	343	11.7
1	182194850	182194875	25	182194862	11	11	1.6
1	182299475	182299500	25	182299487	11	11	1.6
1	182685425	182685475	50	182685437	11	22	2.3
1	182740650	182740750	100	182740712	12	46	0.8
1	182853300	182853450	150	182853412	37	177	23.5
1	182890150	182890375	225	182890287	21	138	9.4
1	183218400	183218650	250	183218487	35	242	11
1	183372400	183372525	125	183372437	12	57	0
1	183474725	183475375	650	183475162	107	1151	84.5
1	183927700	183927775	75	183927712	11	32	3.9
1	183940300	183940500	200	183940337	37	214	27.4
1	184212950	184213000	50	184212987	13	25	3.9
1	184691550	184691700	150	184691612	16	82	0
1	184755825	184756025	200	184755862	38	212	11
1	185218575	185218800	225	185218662	15	118	7
1	185222800	185223175	375	185222987	80	753	16.4
1	185234700	185235050	350	185234862	66	557	50.1
1	185455925	185456000	75	185455937	14	36	6.3
1	185485025	185485175	150	185485112	12	67	10.2
1	186142200	186142400	200	186142312	17	111	19.6
1	186150250	186150500	250	186150362	24	180	24.3
1	186154950	186155275	325	186155087	24	232	17.2
1	187273550	187273700	150	187273612	18	87	7
1	187669450	187669825	375	187669637	83	726	11
1	188492700	188492750	50	188492712	11	22	1.6
1	188725275	188725350	75	188725312	13	37	3.9
1	188916125	188916175	50	188916162	13	25	4.7
1	189111825	189112025	200	189111962	18	106	3.1
1	189303750	189304125	375	189303937	121	1044	0
1	189412275	189412350	75	189412312	12	34	0.8
1	189441350	189441525	175	189441387	17	92	7.8
1	189496350	189496525	175	189496412	17	105	9.4
1	190064400	190064550	150	190064512	17	95	18.8
1	190322400	190322425	25	190322412	11	11	0
1	190586675	190587050	375	190586862	59	552	10.2
1	190888500	190888900	400	190888787	38	405	26.6
1	191627100	191627500	400	191627312	117	1075	31.3
1	191839600	191839800	200	191839637	16	111	0
1	191948325	191948600	275	191948462	50	395	17.2
1	192428850	192429350	500	192429187	34	396	17.2
1	192628475	192628675	200	192628587	17	112	4.7
1	192866425	192866500	75	192866437	12	36	3.1
1	193083075	193083275	200	193083112	18	126	9.4
1	193137500	193137650	150	193137587	14	77	6.3
1	193395050	193395300	250	193395162	27	190	0
1	193692400	193692450	50	193692412	11	22	0.8
1	194456650	194456800	150	194456687	15	82	5.5
1	194939050	194939400	350	194939212	32	312	36
1	195039125	195039350	225	195039212	26	204	21.9
1	195317975	195318275	300	195318137	31	247	22.7
1	195348675	195348925	250	195348787	28	214	19.6
1	195452500	195452925	425	195452787	54	588	43
1	195736350	195736550	200	195736412	15	105	11
1	195777475	195777775	300	195777637	31	237	0
1	195927825	195928100	275	195927937	21	173	4.7
1	195940700	195940900	200	195940812	16	116	0
1	196023250	196023275	25	196023262	11	11	0
1	196101925	196102025	100	196101987	16	55	9.4
1	196288300	196288400	100	196288312	12	48	6.3
1	196314575	196314925	350	196314762	39	366	64.2
1	196378825	196378925	100	196378862	13	49	4.7
1	196421950	196422400	450	196422162	141	1352	18.8
1	196440975	196441000	25	196440987	11	11	0.8
1	196734650	196734950	300	196734812	25	217	14.9
3	4779900	4779925	25	4779912	11	11	1.6
3	5207925	5208300	375	5208212	21	219	7
3	5558475	5558625	150	5558487	12	67	0
3	7057525	7057900	375	7057712	85	703	6.3
3	8807175	8807200	25	8807187	11	11	1.6
3	8918650	8919000	350	8918812	41	348	29
3	9484000	9484225	225	9484137	17	125	7.8
3	9612975	9613300	325	9613137	31	266	8.6
3	9628450	9628850	400	9628637	155	1408	4.7
3	9661475	9661675	200	9661612	22	147	0
3	9734050	9734475	425	9734237	46	508	27.4
3	10109675	10109825	150	10109762	14	75	12.5
3	11007050	11007175	125	11007162	13	59	0
3	14980475	14980625	150	14980537	16	88	10.2
3	14991450	14991500	50	14991462	11	22	0
3	15130950	15131225	275	15131062	21	175	31.3
3	18887600	18887825	225	18887762	19	143	23.5
3	18956525	18956725	200	18956662	17	119	9.4
3	19098075	19098100	25	19098087	11	11	1.6
3	19331150	19331475	325	19331312	35	288	7
3	19355450	19355500	50	19355462	14	27	1.6
3	20148950	20149350	400	20149162	296	2623	18.8
3	20154825	20155025	200	20154937	19	116	3.9
3	20158325	20158550	225	20158437	24	169	2.3
3	20338975	20339125	150	20339012	14	79	4.7
3	20853125	20853200	75	20853187	13	37	6.3
3	21626825	21626900	75	21626887	12	34	0
3	21670425	21670475	50	21670437	11	22	0
3	21715675	21715700	25	21715687	11	11	1.6
3	21755200	21755375	175	21755212	14	87	3.1
3	21817300	21817400	100	21817312	12	46	6.3
3	21824725	21825125	400	21824912	27	333	16.4
3	21858650	21858675	25	21858662	11	11	1.6
3	21863650	21863900	250	21863762	33	258	16.4
3	21989450	21989650	200	21989487	39	219	25.8
3	22001300	22001375	75	22001362	16	44	8.6
3	22015150	22015750	600	22015387	245	2574	50.1
3	23007100	23007275	175	23007212	17	101	3.1
3	23066100	23066175	75	23066137	13	37	5.5
3	23850000	23850250	250	23850112	24	194	3.1
3	25563625	25563925	300	25563812	21	186	6.3
3	25717000	25717050	50	25717012	14	26	2.3
3	25725050	25725225	175	25725162	14	82	10.2
3	25855350	25855675	325	25855537	52	452	22.7
3	26035875	26036125	250	26035987	25	193	3.1
3	26194400	26194650	250	26194512	30	225	0
3	26462025	26462425	400	26462237	128	1138	23.5
3	26987475	26987525	50	26987512	12	23	3.1
3	27042200	27042475	275	27042287	22	178	24.3
3	27822300	27822550	250	27822412	91	688	68.1
3	28054525	28054700	175	28054587	14	88	7.8
3	28054925	28055000	75	28054937	12	36	7
3	28143925	28144125	200	28144012	15	104	0.8
3	28236525	28236725	200	28236637	24	155	0
3	28376875	28377000	125	28376887	12	53	5.5
3	28415900	28416025	125	28415962	16	73	3.9
3	28433750	28433825	75	28433787	12	34	0
3	28460975	28461075	100	28460987	12	43	3.1
3	28638300	28638625	325	28638487	32	321	24.3
3	28755425	28755750	325	28755587	45	371	5.5
3	29398600	29398675	75	29398637	13	38	4.7
3	30323275	30323475	200	30323387	26	177	18
3	30347975	30348250	275	30348112	26	203	10.2
3	30566075	30566150	75	30566087	12	34	2.3
3	32700425	32700625	200	32700537	13	90	6.3
3	33497925	33497950	25	33497937	11	11	0
3	34497600	34497900	300	34497762	34	276	6.3
3	34603150	34603400	250	34603262	20	174	8.6
3	34635325	34635425	100	34635362	17	62	10.2
3	34636925	34637175	250	34637037	17	140	16.4
3	34656875	34657250	375	34657062	41	422	20.3
3	34814750	34814900	150	34814787	18	95	0
3	34845475	34845675	200	34845562	17	110	4.7
3	34859375	34859625	250	34859512	20	154	0.8
3	35020025	35020350	325	35020187	60	503	23.5
3	35282400	35282475	75	35282437	13	37	5.5
3	35340825	35340925	100	35340837	12	45	6.3
3	35343900	35343925	25	35343912	11	11	1.6
3	35417050	35417075	25	35417062	11	11	1.6
3	35465275	35465300	25	35465287	12	12	2.3
3	35532875	35533125	250	35532987	38	299	8.6
3	36543875	36543925	50	36543887	12	24	2.3
3	36554275	36554425	150	36554337	16	80	0
3	37241900	37242050	150	37241962	13	76	0
3	37606075	37606325	250	37606212	33	252	3.9
3	37960700	37960900	200	37960787	20	130	21.1
3	38067175	38067300	125	38067237	13	61	6.3
3	38074150	38074300	150	38074212	15	82	4.7
3	38154300	38154575	275	38154437	29	231	10.2
3	39104075	39104475	400	39104287	141	1304	10.2
3	39153900	39154075	175	39153937	12	81	8.6
3	39274225	39274375	150	39274262	12	67	1.6
3	39400900	39401350	450	39401087	48	500	10.2
3	40247050	40247250	200	40247162	22	144	5.5
3	40563075	40563200	125	40563112	12	58	4.7
3	41505450	41505675	225	41505487	16	124	0
3	41838825	41838875	50	41838837	13	25	4.7
3	42039650	42039700	50	42039662	12	24	3.9
3	43343175	43343425	250	43343287	31	224	0
3	44042500	44042575	75	44042512	11	33	0.8
3	45478750	45478775	25	45478762	11	11	0.8
3	45481450	45481500	50	45481462	13	25	4.7
3	48919850	48919875	25	48919862	11	11	0.8
3	49738650	49738875	225	49738762	15	116	0
3	50173225	50173500	275	50173362	25	193	12.5
3	50534325	50534675	350	50534512	41	359	0
3	50679025	50679175	150	50679062	16	82	0
3	50970300	50970475	175	50970412	22	128	5.5
3	51146225	51146400	175	51146312	18	102	12.5
3	51270475	51270550	75	51270487	14	39	0.8
3	51319275	51319550	275	51319437	48	365	27.4
3	51496225	51496275	50	51496237	11	22	3.1
3	51918925	51919025	100	51918937	12	46	4.7
3	52158475	52158525	50	52158487	11	22	0
3	52501625	52501975	350	52501787	51	444	14.1
3	53295875	53296075	200	53295962	17	111	3.1
3	55189125	55189400	275	55189237	33	262	3.1
3	55302425	55302475	50	55302437	11	22	1.6
3	55511850	55512175	325	55512012	40	344	43.8
3	55675675	55675725	50	55675687	11	22	0
3	56192750	56192775	25	56192762	11	11	0.8
3	56247325	56247475	150	56247362	13	72	2.3
3	56390825	56390875	50	56390862	14	25	3.1
3	56663600	56663650	50	56663612	24	47	7.8
3	57043325	57043450	125	57043387	17	75	4.7
3	57203050	57203300	250	57203162	31	224	18.8
3	57575475	57575500	25	57575487	11	11	0
3	57586125	57586200	75	57586137	11	33	0
3	57663600	57663950	350	57663762	139	1188	57.9
3	58873800	58873950	150	58873887	16	84	7.8
3	59167325	59167500	175	59167362	15	98	16.4
3	59224250	59224650	400	59224437	109	996	26.6
3	59292550	59292675	125	59292587	16	73	11
3	59350875	59350900	25	59350887	11	11	0
3	60647075	60647250	175	60647212	19	103	5.5
3	60654600	60654675	75	60654612	12	36	4.7
3	60841150	60841475	325	60841312	25	214	0
3	60972100	60972200	100	60972112	13	48	0
3	61138325	61138500	175	61138387	15	90	8.6
3	61256550	61256700	150	61256637	15	76	0
3	61343725	61343775	50	61343737	11	22	3.1
3	61428400	61428625	225	61428437	29	193	18.8
3	61484625	61484825	200	61484737	16	111	0
3	61934700	61935025	325	61934862	31	265	10.2
3	62356725	62356975	250	62356862	23	174	0
3	62359650	62360000	350	62359862	48	440	29
3	62370700	62370750	50	62370737	12	23	3.9
3	62543900	62544200	300	62544037	31	251	15.7
3	63219675	63219875	200	63219737	20	123	4.7
3	63658450	63658725	275	63658587	44	353	29.7
3	63752825	63753025	200	63752937	21	122	18.8
3	63814750	63814950	200	63814837	20	132	18.8
3	65745275	65745575	300	65745412	28	233	12.5
3	66414125	66414175	50	66414137	12	24	4.7
3	66732725	66732975	250	66732837	22	175	0
3	67547950	67548050	100	67548037	12	45	0
3	68048875	68048975	100	68048912	14	51	3.9
3	68290125	68290275	150	68290162	16	83	0
3	68334250	68334400	150	68334312	20	98	7.8
3	68605325	68605450	125	68605337	13	57	2.3
3	68664425	68664450	25	68664437	11	11	1.6
3	69157550	69157775	225	69157687	22	157	3.1
3	69461475	69461775	300	69461637	38	317	9.4
3	69494100	69494400	300	69494262	23	229	42.3
3	70601125	70601350	225	70601237	22	152	3.1
3	71577600	71577650	50	71577612	12	24	0
3	73429200	73429350	150	73429262	12	68	2.3
3	75242300	75242400	100	75242312	13	48	0
3	75481550	75481725	175	75481612	17	94	14.1
3	76305500	76305575	75	76305537	14	38	0
3	77916200	77916500	300	77916337	39	308	0
3	79433200	79433550	350	79433362	56	454	12.5
3	79560925	79561050	125	79560987	14	60	7
3	80076100	80076125	25	80076112	11	11	1.6
3	80420625	80420775	150	80420712	13	71	0
3	80670400	80670700	300	80670512	52	416	0
3	80693700	80694075	375	80693887	78	670	0
3	80887375	80887750	375	80887537	95	861	14.9
3	80888125	80888175	50	80888137	11	22	0.8
3	81188225	81188825	600	81188412	69	801	43.8
3	81788000	81788250	250	81788137	29	226	0
3	82082000	82082150	150	82082062	17	89	3.1
3	82100300	82100450	150	82100387	17	87	0
3	82336200	82336500	300	82336337	31	262	11
3	82363475	82363550	75	82363487	12	35	0
3	82961475	82961650	175	82961587	16	97	0
3	83084975	83085300	325	83085162	38	324	28.2
3	83247650	83247675	25	83247662	11	11	0
3	83851975	83852125	150	83852062	15	82	7.8
3	84066100	84066500	400	84066287	53	507	28.2
3	84286625	84286675	50	84286637	14	28	2.3
3	84471600	84471750	150	84471687	14	76	7.8
3	84701450	84701600	150	84701487	17	92	11
3	85024050	85024300	250	85024087	21	176	13.3
3	85038075	85038125	50	85038112	19	35	4.7
3	85202275	85202300	25	85202287	11	11	1.6
3	85385725	85386175	450	85385987	170	1666	79
3	86013950	86014450	500	86014012	18	268	37.6
3	86056825	86056925	100	86056862	13	50	6.3
3	86721900	86722000	100	86721937	13	48	1.6
3	86775075	86775100	25	86775087	11	11	0
3	86905000	86905175	175	86905037	12	83	12.5
3	86930975	86931175	200	86931087	18	122	12.5
3	86936700	86936900	200	86936787	17	113	19.6
3	88060425	88060450	25	88060437	11	11	1.6
3	88224350	88224500	150	88224437	19	100	14.1
3	88278250	88278425	175	88278262	12	83	14.9
3	88290650	88290825	175	88290712	14	90	3.1
3	88291450	88291650	200	88291487	14	104	6.3
3	88292175	88292300	125	88292212	14	60	7
3	88308050	88308400	350	88308212	69	667	14.1
3	88317375	88317625	250	88317462	54	399	22.7
3	89282725	89282775	50	89282737	12	24	4.7
3	89763650	89763875	225	89763737	24	167	16.4
3	89775050	89775100	50	89775062	11	22	0
3	89945100	89945200	100	89945137	17	57	3.1
3	90300000	90300175	175	90300037	17	98	1.6
3	93654125	93654325	200	93654262	22	156	7.8
3	94489650	94489975	325	94489837	51	444	33.6
3	94923775	94923950	175	94923812	14	88	12.5
3	95088075	95088375	300	95088212	41	333	3.1
3	95247600	95247750	150	95247637	14	77	10.2
3	95316050	95316275	225	95316187	20	149	12.5
3	95991150	95991300	150	95991237	17	91	0
3	96038725	96038850	125	96038762	13	61	6.3
3	96233425	96233500	75	96233437	11	33	3.1
3	96246700	96246750	50	96246712	11	22	3.1
3	96347925	96348050	125	96348012	15	66	11.7
3	96688850	96689050	200	96688887	15	105	18.8
3	96867700	96867825	125	96867762	14	64	3.9
3	96965850	96966200	350	96966012	32	305	15.7
3	97592675	97592875	200	97592787	14	102	10.2
3	98112900	98113100	200	98113012	21	131	1.6
3	98128575	98128800	225	98128762	13	93	1.6
3	99510050	99510375	325	99510212	25	219	0
3	100832575	100832825	250	100832662	41	327	10.2
3	101079850	101079925	75	101079887	14	36	0
3	101341750	101341850	100	101341837	13	45	6.3
3	101729675	101729725	50	101729687	11	22	1.6
3	102237275	102237675	400	102237462	156	1399	1.6
3	102241375	102241400	25	102241387	12	12	2.3
3	102603550	102603750	200	102603562	37	231	36.8
3	103187325	103187400	75	103187337	11	33	3.9
3	103749275	103749425	150	103749337	15	77	5.5
3	103910175	103910475	300	103910337	50	395	8.6
3	103919100	103919325	225	103919237	28	199	32.9
3	104073925	104073950	25	104073937	11	11	0.8
3	104136675	104136725	50	104136687	11	22	3.1
3	104513500	104513700	200	104513637	20	123	8.6
3	105531775	105531975	200	105531962	20	134	25
3	105578700	105579050	350	105578862	31	312	33.6
3	105658950	105659275	325	105659112	27	263	25
3	105699350	105699375	25	105699362	11	11	0
3	105713650	105714050	400	105713837	421	3627	75.9
3	107539800	107540200	400	107540012	219	1951	80.6
3	107935500	107935650	150	107935562	12	71	10.2
3	107992125	107992175	50	107992137	12	23	3.9
3	108284550	108284675	125	108284562	18	82	10.2
3	108432700	108433000	300	108432837	31	247	8.6
3	108696125	108696425	300	108696262	35	284	11.7
3	108850875	108851075	200	108850887	17	113	7
3	108986225	108986525	300	108986362	39	316	15.7
3	109401725	109401925	200	109401787	18	113	5.5
3	109427175	109427225	50	109427187	11	22	3.1
3	109435700	109435800	100	109435712	16	58	4.7
3	109496950	109497325	375	109497137	86	772	40.7
3	109751150	109751250	100	109751187	14	50	3.9
3	109859550	109859975	425	109859762	310	2779	7.8
3	109860625	109860850	225	109860712	23	171	3.1
3	110222025	110222400	375	110222212	67	581	8.6
3	110222800	110223075	275	110222962	45	338	10.2
3	114964675	114964825	150	114964762	15	73	0
3	115043775	115044050	275	115043912	28	235	0
3	115272375	115272425	50	115272412	12	23	0
3	115572350	115572375	25	115572362	12	12	2.3
3	115623950	115624250	300	115624037	32	289	15.7
3	115663975	115664025	50	115664012	12	23	0
3	115897225	115897425	200	115897287	21	131	0
3	115961175	115961575	400	115961362	122	1093	34.4
3	116245425	116245650	225	116245487	31	195	10.2
3	116316725	116316800	75	116316737	11	33	2.3
3	119581075	119581125	50	119581112	12	23	1.6
3	120359100	120359375	275	120359262	26	199	5.5
3	121148175	121148525	350	121148337	54	477	2.3
3	121207975	121208225	250	121208062	27	216	0
3	121591250	121591500	250	121591337	21	162	11.7
3	121608375	121608400	25	121608387	11	11	0.8
3	121628475	121628675	200	121628512	19	120	17.2
3	121692300	121692850	550	121692412	25	325	13.3
3	121698625	121698800	175	121698687	14	91	5.5
3	121782575	121782650	75	121782587	11	33	0
3	121956275	121956300	25	121956287	11	11	1.6
3	122161425	122161700	275	122161512	19	172	11.7
3	122283175	122283325	150	122283312	12	61	3.9
3	122305075	122305150	75	122305112	13	37	3.9
3	122454225	122454525	300	122454362	21	206	4.7
3	122475625	122475775	150	122475662	29	135	15.7
3	123321350	123321750	400	123321537	92	838	9.4
3	123500275	123500325	50	123500287	14	27	3.9
3	124579575	124579800	225	124579662	21	156	0
3	125891100	125891150	50	125891112	11	22	0
3	126985625	126985975	350	126985812	46	428	3.1
3	126988775	126988900	125	126988862	14	65	2.3
3	127860950	127861250	300	127861087	28	253	7
3	128404400	128404450	50	128404412	14	25	0
3	129528400	129528500	100	129528412	11	44	4.7
3	129632325	129632675	350	129632512	32	315	30.5
3	129679175	129679200	25	129679187	11	11	0.8
3	130278575	130278650	75	130278612	12	34	0
3	130278875	130278925	50	130278912	12	23	0
3	130279300	130279700	400	130279637	18	202	35.2
3	131043625	131043900	275	131043812	64	528	24.3
3	131860225	131860250	25	131860237	11	11	0.8
3	132818300	132818325	25	132818312	11	11	1.6
3	133481500	133481800	300	133481637	78	641	15.7
3	133692300	133692375	75	133692312	11	33	3.1
3	134176275	134176325	50	134176287	11	22	2.3
3	134180875	134180900	25	134180887	12	12	0.8
3	134240175	134240525	350	134240337	51	469	32.9
3	134549200	134549225	25	134549212	12	12	0.8
3	135103125	135103300	175	135103162	12	83	0
3	135511050	135511175	125	135511112	13	58	0
3	136616925	136617025	100	136616987	14	51	0.8
3	136681675	136681825	150	136681787	16	82	3.1
3	136778700	136778925	225	136778812	20	139	8.6
3	136779725	136780375	650	136779887	33	402	7.8
3	136781300	136781525	225	136781412	20	135	15.7
3	136811975	136812025	50	136811987	14	27	3.1
3	137088000	137088125	125	137088062	13	59	10.2
3	137654000	137654350	350	137654162	21	218	6.3
3	137674925	137675075	150	137674937	13	71	6.3
3	138082100	138082200	100	138082137	14	48	4.7
3	138711750	138711975	225	138711837	22	149	3.1
3	138738625	138738725	100	138738637	26	99	17.2
3	141809825	141809925	100	141809912	15	52	7.8
3	141843675	141843950	275	141843787	23	194	16.4
3	141869575	141869625	50	141869587	11	22	0
3	141873925	141874275	350	141874112	111	988	50.9
3	141875175	141875475	300	141875362	47	373	3.1
3	142001375	142001625	250	142001562	18	152	14.1
3	142246975	142247250	275	142247112	22	181	6.3
3	142247825	142248175	350	142248037	46	436	20.3
3	142253800	142253950	150	142253812	13	69	3.1
3	142364200	142364600	400	142364412	357	3035	33.6
3	142871800	142872000	200	142871862	20	123	11.7
3	142925100	142925475	375	142925287	93	792	5.5
3	144581625	144581875	250	144581737	17	130	11.7
3	145577750	145577925	175	145577762	13	82	12.5
3	145785525	145785775	250	145785637	26	202	25
3	145791850	145792050	200	145791962	24	145	21.1
3	145827900	145827975	75	145827912	13	35	4.7
3	145837400	145837525	125	145837437	13	58	11
3	146265225	146265550	325	146265362	65	569	55.6
3	146544850	146544975	125	146544912	18	76	10.2
3	146721125	146721450	325	146721287	49	401	11
3	146825675	146825750	75	146825687	13	35	0
3	146963650	146963950	300	146963787	28	222	3.1
3	147823600	147823850	250	147823737	22	166	6.3
3	148005475	148005675	200	148005612	17	119	7
3	148684025	148684225	200	148684112	17	111	0
3	148802700	148803025	325	148802862	42	366	44.6
3	148805150	148805175	25	148805162	11	11	1.6
3	148850625	148850900	275	148850787	26	215	1.6
3	149156825	149157000	175	149156912	20	123	11
3	150061675	150061825	150	150061737	27	136	18.8
3	151009650	151010100	450	151009862	329	3000	31.3
3	151013175	151013400	225	151013287	19	128	7.8
3	151347300	151347450	150	151347337	18	92	9.4
3	151829550	151829675	125	151829587	14	60	7.8
3	152071850	152072175	325	152071987	36	311	0
3	153123300	153123425	125	153123362	14	65	3.1
3	153422175	153422300	125	153422212	15	72	6.3
3	154048225	154048325	100	154048237	11	44	0
3	157144325	157144425	100	157144387	13	49	3.1
3	157776575	157776975	400	157776762	144	1289	0
3	157851700	157851875	175	157851762	13	85	11.7
3	157967125	157967150	25	157967137	11	11	0
3	158143200	158143450	250	158143312	20	165	0
3	158951675	158951975	300	158951837	31	245	0
2	3337475	3337800	325	3337537	17	195	11.7
2	3617625	3617950	325	3617787	44	400	0
2	3740325	3740675	350	3740512	53	477	14.9
2	4030900	4031125	225	4030962	19	147	14.9
2	4072600	4073000	400	4072787	48	468	33.6
2	4138575	4138900	325	4138737	23	195	2.3
2	4170475	4170700	225	4170537	23	151	14.1
2	4337950	4338075	125	4338037	17	65	1.6
2	4955700	4955975	275	4955812	26	209	7.8
2	5240125	5240275	150	5240212	17	83	6.3
2	5451325	5451575	250	5451487	24	181	9.4
2	5495025	5495375	350	5495212	66	584	62.6
2	5554275	5554625	350	5554462	133	1184	64.2
2	6173250	6173500	250	6173412	27	206	17.2
2	6368025	6368225	200	6368162	18	122	5.5
2	6511900	6512200	300	6512087	34	296	14.1
2	6559675	6559800	125	6559687	14	60	8.6
2	8975575	8975600	25	8975587	11	11	0
2	9100300	9100350	50	9100312	14	25	3.1
2	9330250	9330375	125	9330262	12	57	6.3
2	10134425	10134625	200	10134562	20	132	21.1
2	10177950	10178350	400	10178162	255	2203	7
2	10180550	10180800	250	10180662	16	135	22.7
2	10191475	10191675	200	10191612	25	152	15.7
2	11117325	11117525	200	11117412	21	138	7
2	11221425	11221500	75	11221437	11	33	0
2	11684825	11685000	175	11684937	17	102	9.4
2	13199075	13199275	200	13199162	22	138	11
2	13303025	13303050	25	13303037	12	12	2.3
2	13418300	13418450	150	13418362	15	83	2.3
2	14527725	14527900	175	14527762	13	84	0
2	14793425	14793500	75	14793487	13	36	4.7
2	14983000	14983350	350	14983187	96	847	26.6
2	17759475	17759575	100	17759487	12	42	0
2	18124575	18124875	300	18124737	30	249	12.5
2	18612425	18612450	25	18612437	11	11	1.6
2	18719725	18720000	275	18719862	22	160	0
2	18861725	18861900	175	18861812	16	98	7
2	19496875	19497225	350	19497062	97	847	32.1
2	20340250	20340300	50	20340262	12	23	1.6
2	20412475	20412675	200	20412612	18	128	10.2
2	20946775	20946875	100	20946787	22	60	7.8
2	21179475	21179525	50	21179487	11	22	1.6
2	21835950	21836300	350	21836112	131	1129	60.3
2	22573625	22573750	125	22573687	13	56	0.8
2	22813275	22813325	50	22813287	12	24	0
2	24301300	24301425	125	24301387	13	58	7.8
2	24921900	24922050	150	24921962	12	67	8.6
2	25002675	25002725	50	25002712	13	25	4.7
2	25953850	25954025	175	25953937	28	157	7.8
2	26265650	26266025	375	26265837	70	604	0
2	26307700	26308050	350	26307887	165	1467	53.2
2	26308800	26308950	150	26308837	16	84	9.4
2	26326025	26326200	175	26326087	17	106	4.7
2	26716775	26717025	250	26716837	22	168	12.5
2	27157000	27157200	200	27157087	19	128	14.9
2	27234200	27234275	75	27234237	16	44	7.8
2	27318200	27318225	25	27318212	13	13	2.3
2	28355325	28355350	25	28355337	11	11	0.8
2	29141650	29141875	225	29141787	22	148	3.9
2	29168750	29168925	175	29168762	12	76	14.9
2	29270725	29270825	100	29270737	12	47	8.6
2	29453525	29453925	400	29453737	127	1092	4.7
2	29657475	29657500	25	29657487	24	24	4.7
2	30257925	30257975	50	30257937	11	22	0
2	30310550	30310750	200	30310637	18	128	19.6
2	30476175	30476450	275	30476312	45	353	29
2	30543800	30543925	125	30543812	13	58	6.3
2	30559700	30560025	325	30559912	54	490	48.5
2	30572125	30572175	50	30572137	12	24	4.7
2	30629850	30629900	50	30629862	26	47	7
2	30941775	30942000	225	30941912	41	292	34.4
2	31271725	31271825	100	31271737	20	65	11
2	31432025	31432200	175	31432162	13	77	3.9
2	31672200	31672300	100	31672237	15	57	4.7
2	31860800	31860975	175	31860862	21	123	17.2
2	32259225	32259375	150	32259262	14	67	8.6
2	32388825	32388900	75	32388837	13	36	4.7
2	32836800	32837150	350	32836987	91	753	20.3
2	33082825	33082950	125	33082862	14	68	7.8
2	33140775	33140825	50	33140787	11	22	2.3
2	33263050	33263075	25	33263062	11	11	0.8
2	33266500	33266525	25	33266512	11	11	1.6
2	33438425	33438550	125	33438537	16	67	10.2
2	33900550	33900825	275	33900737	28	231	6.3
2	33908175	33908425	250	33908287	26	200	14.1
2	34071750	34071850	100	34071787	13	49	5.5
2	34082500	34082825	325	34082687	37	356	1.6
2	34185825	34186000	175	34185937	14	88	4.7
2	34368225	34368250	25	34368237	11	11	1.6
2	34736450	34736725	275	34736637	37	302	39.1
2	35356275	35356575	300	35356437	37	275	10.2
2	35690500	35690775	275	35690587	29	256	5.5
2	36090025	36090200	175	36090112	17	111	4.7
2	37933875	37934025	150	37933962	13	71	4.7
2	38326425	38326450	25	38326437	14	14	1.6
2	38393850	38393925	75	38393862	12	34	2.3
2	38646150	38646275	125	38646212	41	186	32.1
2	39195250	39195350	100	39195287	13	46	0.8
2	40154625	40154900	275	40154737	34	289	3.1
2	40332625	40332900	275	40332787	29	233	23.5
2	41320150	41320425	275	41320287	29	223	0
2	42046325	42046575	250	42046462	28	200	0
2	42387625	42387775	150	42387712	16	83	0
2	43544925	43544975	50	43544937	15	28	4.7
2	43724550	43724925	375	43724737	106	936	25
2	43890150	43890400	250	43890287	19	149	14.1
2	43890625	43890650	25	43890637	11	11	1.6
2	43944850	43944925	75	43944887	12	34	0
2	43976600	43976750	150	43976687	15	77	0
2	44219950	44220300	350	44220112	77	641	6.3
2	44846550	44846850	300	44846737	22	197	29
2	44986600	44986750	150	44986612	12	69	0
2	46488525	46488725	200	46488612	18	124	6.3
2	47945875	47946000	125	47945887	15	66	9.4
2	48421425	48421700	275	48421537	25	197	36.8
2	49422575	49422675	100	49422637	15	53	0
2	49563925	49564050	125	49563962	12	59	7.8
2	50127325	50127400	75	50127337	11	32	0
2	50411450	50411650	200	50411487	31	191	14.9
2	50860675	50860975	300	50860812	35	309	0.8
2	50961475	50961675	200	50961587	16	115	11
2	51107050	51107150	100	51107062	13	48	8.6
2	51112800	51113075	275	51112937	38	313	33.6
2	51406800	51406900	100	51406812	12	47	6.3
2	51432500	51433275	775	51433087	572	5133	31.3
2	51575225	51575300	75	51575237	17	44	3.9
2	52751925	52752300	375	52752112	46	435	29
2	53533175	53533550	375	53533287	18	213	1.6
2	53805825	53806025	200	53805937	24	156	0
2	55632775	55632975	200	55632862	23	155	0
2	57989900	57989925	25	57989912	12	12	2.3
2	58526925	58527075	150	58527012	14	75	7
2	58527475	58527600	125	58527487	11	53	7
2	58565400	58565600	200	58565437	16	115	9.4
2	59114100	59114225	125	59114112	13	62	1.6
2	59411425	59411550	125	59411462	12	58	3.9
2	59828525	59828625	100	59828562	12	46	0
2	60589150	60589175	25	60589162	11	11	1.6
2	61334075	61334375	300	61334187	28	259	19.6
2	61443900	61444125	225	61444037	19	130	16.4
2	61847275	61847525	250	61847362	22	178	25.8
2	62108400	62108525	125	62108437	14	62	7.8
2	62608500	62608700	200	62608537	17	120	21.1
2	62609850	62610025	175	62609937	14	91	6.3
2	62918700	62918900	200	62918812	18	104	0
2	63763825	63764075	250	63763962	19	158	12.5
2	63771175	63771225	50	63771212	13	24	3.1
2	63790425	63790575	150	63790487	14	70	3.1
2	64407800	64407900	100	64407812	12	46	0
2	65037975	65038200	225	65038112	23	156	7
2	65214550	65214600	50	65214562	11	22	1.6
2	65732925	65732950	25	65732937	11	11	1.6
2	65757675	65757775	100	65757762	13	46	0
2	65795925	65796350	425	65796137	404	3484	25.8
2	66366475	66366850	375	66366662	105	896	12.5
2	67383975	67384325	350	67384137	91	763	0
2	68812300	68812575	275	68812437	22	173	12.5
2	68855425	68855475	50	68855437	11	22	3.1
2	68883750	68884075	325	68883937	35	320	7.8
2	68887825	68887925	100	68887837	17	61	5.5
2	69129825	69129850	25	69129837	13	13	2.3
2	70016350	70016450	100	70016437	23	72	12.5
2	70220325	70220350	25	70220337	13	13	2.3
2	71033975	71034000	25	71033987	11	11	0
2	71044175	71044500	325	71044337	72	587	9.4
2	71102075	71102325	250	71102162	24	181	7.8
2	71330425	71330800	375	71330612	136	1233	25
2	71413175	71413425	250	71413287	24	189	10.2
2	71495575	71495750	175	71495637	19	115	9.4
2	71509775	71509950	175	71509862	19	111	19.6
2	71752150	71752250	100	71752162	12	47	7
2	72036000	72036025	25	72036012	13	13	2.3
2	72227800	72228100	300	72227912	23	212	25
2	72886825	72887000	175	72886837	16	105	20.3
2	72901075	72901150	75	72901087	12	33	4.7
2	73373350	73373650	300	73373462	30	261	18.8
2	73591350	73591375	25	73591362	12	12	2.3
2	73867550	73867875	325	73867662	60	538	20.3
2	74011225	74011375	150	74011312	14	73	0
2	74188950	74189300	350	74189112	59	510	23.5
2	74227700	74227825	125	74227762	14	63	7.8
2	74952050	74952250	200	74952137	21	129	0
2	75047125	75047200	75	75047137	11	32	4.7
2	75271300	75271400	100	75271337	23	87	14.1
2	75343250	75343575	325	75343437	36	298	21.9
2	75406675	75406750	75	75406687	11	33	2.3
2	75569075	75569425	350	75569162	20	234	38.3
2	75871175	75871550	375	75871362	69	653	29.7
2	76862750	76862950	200	76862812	14	107	4.7
2	76950400	76950625	225	76950587	29	220	6.3
2	76984025	76984050	25	76984037	12	12	2.3
2	77117825	77118150	325	77117987	24	239	26.6
2	77487175	77487525	350	77487337	41	400	16.4
2	77582475	77582500	25	77582487	11	11	0.8
2	77837550	77837750	200	77837637	21	149	4.7
2	77961000	77961150	150	77961112	22	108	17.2
2	77970350	77970550	200	77970487	20	129	19.6
2	78085700	78085850	150	78085787	14	73	1.6
2	78148325	78148550	225	78148462	19	143	0
2	78228775	78229175	400	78228987	333	2864	19.6
2	78673075	78673150	75	78673087	11	33	2.3
2	78778875	78779175	300	78779012	42	328	0
2	78860175	78860550	375	78860362	94	812	18.8
2	78986650	78986900	250	78986712	29	228	12.5
2	79152200	79152575	375	79152387	102	866	10.2
2	79197950	79198150	200	79198037	16	110	11
2	79398050	79398275	225	79398137	21	145	0
2	79431300	79431475	175	79431387	14	90	4.7
2	80652075	80652200	125	80652162	16	72	7.8
2	82400875	82401075	200	82400962	17	118	0
2	83895725	83895825	100	83895762	13	47	6.3
2	83974325	83974500	175	83974362	14	93	5.5
2	84097275	84097650	375	84097462	154	1365	10.2
2	84217375	84217550	175	84217412	14	86	3.9
2	84225375	84225575	200	84225412	12	87	11
2	84322725	84322825	100	84322812	16	53	6.3
2	84848550	84848975	425	84848787	276	2451	45.4
2	85038875	85039250	375	85039062	53	494	24.3
2	85086100	85086175	75	85086112	13	38	2.3
2	85972550	85972725	175	85972612	19	116	9.4
2	90546425	90546450	25	90546437	12	12	2.3
2	91131175	91131350	175	91131237	20	114	16.4
2	91231400	91231725	325	91231562	40	355	46.2
2	91281750	91281925	175	91281812	19	109	16.4
2	91916775	91916975	200	91916912	21	151	3.1
2	91999075	91999350	275	91999187	30	236	18.8
2	92074300	92074525	225	92074362	23	159	3.1
2	92658100	92658400	300	92658262	44	342	12.5
2	92713325	92713400	75	92713387	17	48	7.8
2	93585900	93585975	75	93585962	17	42	6.3
2	93923650	93923675	25	93923662	12	12	2.3
2	93959275	93959300	25	93959287	12	12	2.3
2	94199425	94199450	25	94199437	12	12	2.3
2	94564775	94564825	50	94564787	11	22	0
2	96135525	96135700	175	96135637	17	97	2.3
2	96304975	96305175	200	96305062	21	139	11.7
2	97279475	97280025	550	97279637	35	451	61.8
2	97344700	97344725	25	97344712	11	11	0.8
2	97390275	97390525	250	97390412	20	155	0
2	98463350	98463725	375	98463512	253	3159	453.1
2	98464300	98464475	175	98464462	59	215	31.3
2	98465675	98466175	500	98465987	78	912	41.5
2	98466900	98467300	400	98467262	207	2366	277
2	101399325	101399375	50	101399337	12	23	0
2	101418750	101418975	225	101418887	21	139	0
2	101466250	101466500	250	101466387	21	156	11.7
2	101479050	101479075	25	101479062	11	11	1.6
2	101774600	101774950	350	101774787	30	263	0
2	101779850	101780150	300	101779962	42	400	45.4
2	101787675	101787700	25	101787687	11	11	0.8
2	101804175	101804275	100	101804212	13	51	9.4
2	101804500	101804600	100	101804512	13	52	10.2
2	101895300	101895350	50	101895337	14	25	3.9
2	101931350	101931475	125	101931387	14	64	11
2	102253700	102253800	100	102253762	19	68	11.7
2	102399525	102399850	325	102399712	68	564	23.5
2	102417775	102417875	100	102417837	12	46	6.3
2	102450125	102450150	25	102450137	11	11	1.6
2	102462775	102463100	325	102462962	60	506	43.8
2	102560400	102560600	200	102560537	17	113	6.3
2	102564150	102564325	175	102564212	22	128	7.8
2	102744950	102745100	150	102745012	19	99	3.9
2	102821425	102821775	350	102821562	20	213	0
2	103009900	103010225	325	103010062	29	276	0
2	103389825	103389900	75	103389837	12	35	5.5
2	104019100	104019150	50	104019112	14	28	3.1
2	104168775	104169100	325	104168912	22	232	25
2	105083250	105083575	325	105083387	39	338	24.3
2	105171075	105171250	175	105171137	16	98	3.1
2	105217525	105217925	400	105217712	187	1652	6.3
2	105409050	105409100	50	105409062	13	25	4.7
2	105476275	105476325	50	105476287	14	25	2.3
2	105884600	105884875	275	105884712	26	221	6.3
2	106232000	106232050	50	106232012	11	22	0
2	106451000	106451250	250	106451087	16	135	16.4
2	106516875	106517300	425	106517087	478	4334	25
2	106536825	106536900	75	106536837	11	32	4.7
2	106598725	106598750	25	106598737	11	11	0.8
2	106600375	106600650	275	106600512	37	288	0
2	108398550	108398850	300	108398662	33	273	14.1
2	108532775	108532900	125	108532787	14	66	3.1
2	108692975	108693175	200	108693037	17	104	9.4
2	108948175	108948425	250	108948312	31	223	0
2	109185000	109185100	100	109185037	13	51	9.4
2	109544725	109544750	25	109544737	12	12	2.3
2	109980625	109980775	150	109980712	13	73	9.4
2	110640525	110640600	75	110640537	11	33	0
2	112011225	112011250	25	112011237	11	11	0
2	112062475	112062650	175	112062562	18	111	18.8
2	112168875	112168900	25	112168887	25	25	4.7
2	112179675	112179950	275	112179787	30	245	8.6
2	112782875	112783075	200	112782987	18	118	5.5
2	113177875	113178050	175	113177937	21	130	15.7
2	113497100	113497225	125	113497187	15	64	0
2	113650000	113650350	350	113650187	35	325	29
2	113887875	113888125	250	113888012	19	157	0
2	114505725	114505925	200	114505762	16	117	0
2	115228600	115228750	150	115228712	13	67	3.1
2	115540225	115540450	225	115540337	19	136	6.3
2	115671525	115671925	400	115671737	301	2527	6.3
2	116537225	116537575	350	116537412	31	303	14.1
2	116667125	116667225	100	116667137	15	54	7
2	116814450	116814550	100	116814462	12	48	7.8
2	117233125	117233150	25	117233137	11	11	1.6
2	117377200	117377225	25	117377212	11	11	0
2	117883100	117883175	75	117883112	14	41	3.1
2	119070100	119070300	200	119070212	19	120	14.1
2	119168225	119168250	25	119168237	16	16	3.1
2	119309125	119309400	275	119309262	17	153	3.1
2	120230850	120231075	225	120230912	24	187	30.5
2	122043550	122043725	175	122043612	19	113	6.3
2	122223275	122223475	200	122223337	17	117	1.6
2	122297325	122297575	250	122297412	28	220	10.2
2	122375100	122375500	400	122375287	159	1392	0
2	123055700	123055925	225	123055837	18	142	11.7
2	123077175	123077225	50	123077212	12	23	0
2	123408275	123408325	50	123408287	12	23	0
2	123504875	123505325	450	123505137	33	407	28.2
2	123837050	123837350	300	123837162	36	296	10.2
2	123930150	123930375	225	123930287	18	134	7
2	124061075	124061100	25	124061087	13	13	2.3
2	124210600	124210825	225	124210712	26	180	7.8
2	124412450	124412600	150	124412562	13	70	5.5
2	124439125	124439375	250	124439262	29	199	24.3
2	124484225	124484350	125	124484287	13	62	10.2
2	125336700	125336775	75	125336737	13	38	6.3
2	125515525	125515675	150	125515537	12	71	4.7
2	125734150	125734475	325	125734337	52	431	29
2	126507300	126507625	325	126507437	45	405	36
2	126539400	126539575	175	126539462	15	89	0
2	126820475	126820875	400	126820662	96	882	54.8
2	126960925	126960950	25	126960937	11	11	1.6
2	127199350	127199750	400	127199537	78	747	51.6
2	127214000	127214025	25	127214012	12	12	2.3
2	127448850	127448875	25	127448862	11	11	0.8
2	128430275	128430300	25	128430287	12	12	1.6
2	128450150	128450500	350	128450312	59	514	48.5
2	128865025	128865050	25	128865037	12	12	1.6
2	129759775	129760000	225	129759912	25	164	6.3
2	130166800	130166850	50	130166812	16	28	4.7
2	130183850	130183975	125	130183912	18	77	7.8
2	130882225	130882250	25	130882237	12	12	1.6
2	130901925	130902250	325	130902062	51	445	39.9
2	131249525	131249650	125	131249562	14	66	3.1
2	131539200	131539225	25	131539212	13	13	2.3
2	131721700	131721975	275	131721812	34	267	32.1
2	134452625	134452700	75	134452687	13	36	2.3
2	134754450	134754700	250	134754587	23	190	9.4
2	134847700	134847775	75	134847737	13	36	2.3
2	135233500	135233700	200	135233562	19	124	3.9
2	136365575	136365850	275	136365712	33	263	13.3
2	136373775	136374000	225	136373862	19	145	7
2	136801525	136801825	300	136801687	23	201	3.9
2	136844575	136844775	200	136844687	27	169	24.3
2	137125075	137125325	250	137125237	23	163	7.8
2	137148725	137149025	300	137148837	20	191	11
2	137630450	137630750	300	137630587	36	322	35.2
2	138312475	138312625	150	138312562	15	78	0.8
2	139220500	139220600	100	139220512	14	53	4.7
2	139819525	139819775	250	139819637	31	226	23.5
2	139936050	139936325	275	139936162	26	193	7.8
2	140361900	140362000	100	140361987	15	55	8.6
2	140531475	140531550	75	140531487	12	35	4.7
2	141567850	141568175	325	141567987	33	292	30.5
2	142054475	142054775	300	142054587	52	433	11.7
2	142252575	142252650	75	142252587	12	35	1.6
2	142339500	142339775	275	142339662	21	181	23.5
2	142672300	142672500	200	142672337	17	120	7
2	143819100	143819500	400	143819287	184	1594	13.3
2	144599675	144599900	225	144599787	20	139	16.4
2	144980075	144980125	50	144980087	12	24	4.7
2	145953600	145953725	125	145953687	21	83	8.6
2	145993825	145994075	250	145993937	25	198	14.9
2	146015825	146016025	200	146015937	17	125	3.1
2	146022525	146022550	25	146022537	11	11	1.6
2	146039675	146039750	75	146039687	12	35	3.1
2	146114575	146114725	150	146114662	15	79	3.1
2	146240475	146240650	175	146240562	15	91	13.3
2	146267100	146267375	275	146267237	29	239	11
2	146385600	146385950	350	146385787	94	836	27.4
2	146402150	146402725	575	146402312	25	440	66.5
2	146414250	146414350	100	146414262	12	47	5.5
2	146415700	146415825	125	146415762	16	69	1.6
2	146576000	146576150	150	146576062	13	72	1.6
2	146649875	146650300	425	146650087	134	1261	34.4
2	146990125	146990425	300	146990262	57	494	32.1
2	147933650	147934025	375	147933837	87	774	6.3
2	148030350	148030675	325	148030487	69	567	9.4
2	148170025	148170050	25	148170037	11	11	1.6
2	148434475	148434850	375	148434662	81	668	14.1
2	148581425	148581675	250	148581487	16	132	4.7
2	149358000	149358200	200	149358062	16	112	5.5
2	150334800	150335025	225	150334912	22	156	11.7
2	150348925	150349050	125	150349012	22	93	12.5
2	150354900	150355175	275	150355062	28	230	7.8
2	150365775	150365975	200	150365887	16	113	7.8
2	150480175	150480450	275	150480337	40	295	14.1
2	150578600	150578675	75	150578612	11	33	1.6
2	151211700	151211775	75	151211737	14	39	0
2	151585800	151585900	100	151585837	19	70	7.8
2	151741725	151742175	450	151741962	206	1869	46.2
2	153403825	153404250	425	153403937	21	254	27.4
2	153883650	153883675	25	153883662	11	11	0.8
2	154224400	154224450	50	154224412	11	22	0
2	154550550	154550875	325	154550712	50	414	0
2	154568150	154568275	125	154568187	13	60	3.9
2	154765750	154766125	375	154765937	65	576	47.7
2	154927750	154927950	200	154927787	40	262	32.9
2	155076500	155076725	225	155076587	23	172	27.4
2	155282850	155283225	375	155283037	130	1118	47
2	155332225	155332350	125	155332337	14	61	2.3
2	155545975	155546000	25	155545987	11	11	0
2	155909300	155909550	250	155909387	18	142	0
2	155948225	155948600	375	155948412	84	754	19.6
2	156272775	156272950	175	156272862	16	92	11
2	156276500	156276925	425	156276712	303	2718	61.8
2	156553400	156553800	400	156553587	125	1109	32.1
2	156668050	156668375	325	156668212	47	392	13.3
2	156759625	156759700	75	156759637	17	47	5.5
2	156762025	156762125	100	156762062	14	51	9.4
2	156765650	156765850	200	156765762	20	138	10.2
2	157257825	157258250	425	157258037	283	2571	69.6
2	157536250	157536500	250	157536362	31	234	21.9
2	158531575	158531625	50	158531587	11	22	3.1
2	159850075	159850350	275	159850212	22	169	8.6
2	160301625	160301800	175	160301637	22	124	17.2
2	160477750	160478100	350	160477912	33	295	7
2	160532675	160533000	325	160532812	49	402	6.3
2	160563375	160563575	200	160563462	19	132	7
2	160736200	160736225	25	160736212	11	11	0
2	160840525	160840625	100	160840587	13	48	3.1
2	160888225	160888450	225	160888337	21	140	5.5
2	161040500	161040850	350	161040662	52	443	14.1
2	161359775	161359925	150	161359837	18	94	4.7
2	161519750	161520050	300	161519887	27	209	4.7
2	162083350	162083700	350	162083537	41	406	36.8
2	162622075	162622300	225	162622162	30	189	13.3
2	162865525	162865650	125	162865637	20	75	8.6
2	162988625	162989025	400	162988812	161	1556	19.6
2	163226450	163226650	200	163226537	15	98	11
2	163377550	163377850	300	163377662	15	145	14.1
2	163414225	163414400	175	163414262	21	122	19.6
2	163566450	163566475	25	163566462	12	12	2.3
2	163800050	163800150	100	163800137	15	50	7.8
2	164184175	164184200	25	164184187	11	11	0.8
2	164514575	164514600	25	164514587	12	12	2.3
2	164906650	164906850	200	164906712	15	103	12.5
2	164962650	164962775	125	164962762	19	88	11
2	164979700	164979800	100	164979737	14	54	9.4
2	165052150	165052175	25	165052162	11	11	1.6
2	165185050	165185275	225	165185187	28	206	18.8
2	166249575	166249950	375	166249762	65	589	15.7
2	166421400	166421775	375	166421587	83	768	32.1
2	166483700	166483925	225	166483787	24	180	7
2	166514175	166514300	125	166514187	11	55	7.8
2	166779025	166779375	350	166779187	44	388	7
2	166881450	166881650	200	166881537	24	154	12.5
2	167633550	167633575	25	167633562	11	11	1.6
2	167640625	167640875	250	167640712	24	189	7.8
2	167649825	167650100	275	167649987	28	230	32.1
2	167733175	167733375	200	167733237	20	142	11.7
2	167798400	167798875	475	167798687	161	1475	44.6
2	167890175	167890350	175	167890237	15	91	0
2	168539875	168540025	150	168539912	17	96	11
2	169909900	169910075	175	169910062	17	91	16.4
2	169937225	169937250	25	169937237	11	11	0
2	169973800	169973975	175	169973887	16	99	12.5
2	170424875	170425250	375	170425062	85	761	0
2	170570100	170570275	175	170570187	18	99	7.8
2	170613400	170613725	325	170613587	35	307	18.8
2	170691525	170691725	200	170691612	20	123	0
2	170928750	170928900	150	170928887	17	88	14.1
2	171003900	171004200	300	171004037	29	232	42.3
2	171279375	171279650	275	171279487	24	197	13.3
2	171324550	171324725	175	171324612	19	123	14.9
2	171521900	171522125	225	171521987	20	153	0
2	171538400	171538650	250	171538462	30	234	21.1
2	171547775	171548000	225	171547837	28	208	14.9
2	171918250	171918325	75	171918262	11	33	2.3
2	173408700	173408825	125	173408737	15	70	11
2	174201825	174201850	25	174201837	11	11	0.8
2	179294125	179294375	250	179294237	21	165	9.4
2	179341875	179342250	375	179342062	104	876	0.8
2	179358250	179358650	400	179358462	217	1887	14.9
2	179414100	179414325	225	179414162	24	180	11
2	179420500	179420575	75	179420562	16	39	7
2	179500700	179500900	200	179500812	20	137	14.9
2	179512875	179513025	150	179512937	13	73	1.6
2	179772975	179773075	100	179773012	14	50	6.3
2	179910150	179910325	175	179910187	14	86	16.4
2	180350325	180350425	100	180350337	14	53	7
2	180451000	180451300	300	180451162	85	691	37.6
2	180622175	180622200	25	180622187	11	11	1.6
2	180808875	180809225	350	180809037	132	1120	47.7
2	180972050	180972250	200	180972162	25	164	11.7
2	180986875	180987125	250	180986987	23	171	3.9
2	181705350	181705400	50	181705362	17	31	5.5
5	3401175	3401550	375	3401362	84	724	17.2
5	3710250	3710450	200	3710337	19	123	11
5	3734525	3734650	125	3734562	17	68	3.9
5	4536750	4537050	300	4536887	26	238	4.7
5	4779300	4779625	325	4779462	54	479	11.7
5	4857450	4857725	275	4857612	25	213	9.4
5	4923425	4923600	175	4923537	18	98	5.5
5	4935775	4935825	50	4935787	12	23	0
5	5326875	5327150	275	5327037	19	170	17.2
5	5520000	5520175	175	5520087	16	95	7.8
5	7299325	7299650	325	7299462	24	194	0
5	8171200	8171300	100	8171237	12	46	0
5	9017350	9017750	400	9017512	23	290	32.1
5	9759800	9759825	25	9759812	11	11	0
5	10598575	10598775	200	10598637	20	120	5.5
5	12504225	12504625	400	12504412	192	1654	6.3
5	13269300	13269475	175	13269312	14	88	0
5	13318675	13319075	400	13318862	69	646	23.5
5	13406300	13406700	400	13406512	141	1255	0
5	13553550	13553925	375	13553737	103	929	37.6
5	14168650	14168875	225	14168812	16	123	1.6
5	15629150	15629225	75	15629162	12	35	0
5	15755425	15755625	200	15755587	20	120	0
5	15885975	15886075	100	15886062	12	44	1.6
5	17063575	17063850	275	17063687	27	216	0
5	17241150	17241175	25	17241162	11	11	0
5	19739725	19740100	375	19739912	70	609	47
5	19776050	19776400	350	19776237	99	845	21.9
5	20047300	20047700	400	20047512	141	1249	36
5	20260000	20260250	250	20260162	16	124	5.5
5	20307900	20307975	75	20307912	14	40	0
5	20545425	20545725	300	20545587	57	478	23.5
5	20687475	20687500	25	20687487	11	11	0.8
5	21152800	21153100	300	21152912	31	267	0
5	21759550	21759725	175	21759662	19	112	4.7
5	22182100	22182300	200	22182187	21	143	3.1
5	22515025	22515225	200	22515112	16	103	11
5	22677725	22678125	400	22677787	18	183	15.7
5	22926125	22926200	75	22926137	11	33	0.8
5	23128050	23128225	175	23128137	14	87	3.1
5	23613475	23613600	125	23613512	16	65	0
5	24327000	24327125	125	24327037	14	64	3.9
5	27310175	27310350	175	27310212	17	98	18
5	27322375	27322400	25	27322387	11	11	0.8
5	27412225	27412525	300	27412362	35	282	6.3
5	27456975	27457075	100	27457012	14	50	6.3
5	27522475	27522525	50	27522487	11	22	0
5	27637175	27637750	575	27637312	30	379	29.7
5	27718150	27718325	175	27718287	13	82	3.1
5	28467100	28467450	350	28467262	92	797	67.3
5	29468375	29468650	275	29468487	27	219	14.1
5	29584725	29585025	300	29584862	32	264	0
5	29695800	29695900	100	29695837	12	45	0
5	30436875	30437075	200	30436987	25	171	11.7
5	30998550	30998725	175	30998662	26	145	21.1
5	31396500	31396550	50	31396512	11	22	1.6
5	31416575	31416750	175	31416662	15	89	7.8
5	32554925	32555250	325	32555087	43	366	14.9
5	33328125	33328425	300	33328262	29	244	17.2
5	33347400	33347675	275	33347562	21	165	7
5	34000925	34001075	150	34000962	25	134	13.3
5	34567075	34567250	175	34567187	23	140	18.8
5	34686425	34686625	200	34686487	46	264	26.6
5	34976775	34977100	325	34976962	106	864	77.5
5	35192675	35192775	100	35192737	12	46	0
5	35349925	35350250	325	35350062	46	409	32.1
5	35506125	35506225	100	35506187	16	54	6.3
5	35518475	35518675	200	35518587	13	93	5.5
5	35938250	35938350	100	35938312	12	46	0.8
5	35988400	35988625	225	35988562	24	173	21.9
5	36225000	36225300	300	36225112	59	484	58.7
5	36250925	36251025	100	36251012	13	49	2.3
5	36400075	36400300	225	36400187	29	197	21.9
5	36432450	36432825	375	36432637	174	1497	27.4
5	36447475	36447625	150	36447612	27	127	14.1
5	36520475	36520700	225	36520562	22	161	14.1
5	36653575	36653675	100	36653587	12	45	5.5
5	37027150	37027275	125	37027262	13	54	10.2
5	37212675	37212825	150	37212712	26	120	7
5	38365700	38365900	200	38365812	22	135	0
5	39702925	39703200	275	39703087	28	216	0
5	42453125	42453175	50	42453162	13	24	3.9
5	43269150	43269375	225	43269287	17	133	18
5	43681450	43681750	300	43681662	42	377	23.5
5	43792750	43792925	175	43792787	15	96	7
5	44771650	44771850	200	44771787	22	141	18
5	44826325	44826375	50	44826337	11	22	3.1
5	44942850	44942950	100	44942862	12	43	3.9
5	45043000	45043025	25	45043012	11	11	0
5	45296375	45296425	50	45296412	12	23	1.6
5	45391125	45391275	150	45391137	15	78	4.7
5	45393550	45393775	225	45393637	20	124	1.6
5	45508975	45509125	150	45509012	18	96	3.1
5	49580325	49580400	75	49580337	11	32	4.7
5	49644800	49644825	25	49644812	12	12	0.8
5	50256725	50256850	125	50256787	15	67	3.9
5	51334125	51334250	125	51334187	15	68	11.7
5	51485025	51485100	75	51485062	12	35	1.6
5	51700775	51700950	175	51700787	11	71	6.3
5	51840700	51840750	50	51840712	11	22	3.1
5	51968175	51968575	400	51968362	88	793	31.3
5	53503350	53503425	75	53503362	11	33	4.7
5	53758950	53759150	200	53759062	16	110	6.3
5	54288400	54288450	50	54288412	11	22	0
5	54392875	54393150	275	54393037	18	151	1.6
5	58003425	58003550	125	58003537	20	81	11
5	58401400	58401775	375	58401587	36	359	0
5	58460675	58460775	100	58460737	14	53	4.7
5	58724875	58724900	25	58724887	11	11	0
5	62917400	62917450	50	62917412	13	25	0
5	62972900	62972925	25	62972912	11	11	1.6
5	63101725	63102300	575	63102087	49	597	12.5
5	63109150	63109275	125	63109162	12	54	2.3
5	63677225	63677350	125	63677287	12	57	0
5	63968450	63968475	25	63968462	11	11	0
5	64323150	64323550	400	64323362	89	829	25.8
5	64475250	64475525	275	64475412	20	161	18
5	64503750	64504175	425	64503962	372	3309	11
5	64624700	64625025	325	64624862	41	359	14.1
5	64657850	64657950	100	64657862	11	42	0
5	64980525	64980925	400	64980737	89	853	48.5
5	65085150	65085350	200	65085312	21	145	29
5	65315800	65316150	350	65315962	40	396	52.4
5	65410100	65410425	325	65410262	24	236	18
5	65886825	65886850	25	65886837	11	11	0.8
5	66229400	66229550	150	66229512	16	84	7.8
5	66607100	66607375	275	66607262	34	282	11
5	66617325	66617525	200	66617412	17	112	11
5	66663750	66663825	75	66663787	16	44	7.8
5	66707175	66707475	300	66707312	43	346	6.3
5	66771275	66771575	300	66771412	38	311	25
5	66814000	66814150	150	66814112	20	102	7.8
5	66824625	66825175	550	66824762	33	381	55.6
5	67010225	67010350	125	67010287	16	67	8.6
5	67168675	67168825	150	67168787	15	80	3.9
5	67197425	67197825	400	67197637	83	804	32.1
5	67370975	67371275	300	67371112	25	219	25
5	67660900	67661150	250	67661012	25	191	5.5
5	67912550	67912750	200	67912712	18	124	0
5	68121750	68121775	25	68121762	15	15	2.3
5	68215000	68215175	175	68215112	15	98	3.9
5	68425950	68426225	275	68426112	31	239	0
5	69944825	69945000	175	69944912	12	78	5.5
5	71122125	71122200	75	71122137	11	33	4.7
5	71394450	71394525	75	71394487	13	36	5.5
5	72256100	72256300	200	72256162	18	113	0
5	73040900	73041150	250	73041037	23	164	5.5
5	73089325	73089375	50	73089337	11	22	0
5	73135175	73135275	100	73135212	13	47	5.5
5	73181525	73181800	275	73181612	23	178	4.7
5	73410450	73410525	75	73410462	15	41	3.1
5	74170100	74170450	350	74170287	72	627	25.8
5	74764300	74764600	300	74764412	26	225	0
5	74831225	74831625	400	74831437	365	3225	11
5	75002375	75002500	125	75002462	14	58	1.6
5	75073750	75073850	100	75073762	16	58	8.6
5	75095200	75095275	75	75095262	15	40	3.9
5	75280900	75281025	125	75280962	16	72	2.3
5	75329075	75329100	25	75329087	11	11	0.8
5	75888250	75888575	325	75888412	44	375	17.2
5	76002075	76002250	175	76002087	12	79	3.1
5	76090575	76090750	175	76090662	15	94	4.7
5	76256650	76256925	275	76256762	37	293	7
5	77919450	77919675	225	77919537	31	241	21.9
5	78881650	78881900	250	78881737	24	173	6.3
5	78913125	78913275	150	78913162	13	72	2.3
5	80888175	80888200	25	80888187	11	11	1.6
5	81972950	81972975	25	81972962	12	12	1.6
5	82102900	82103150	250	82102987	23	179	5.5
5	82103525	82103775	250	82103637	16	130	21.9
5	82276525	82276700	175	82276587	15	96	12.5
5	82360275	82360400	125	82360337	13	59	0
5	82434275	82434300	25	82434287	11	11	0.8
5	82567650	82567850	200	82567762	19	130	0
5	82630675	82630800	125	82630687	13	58	5.5
5	82714775	82714900	125	82714812	13	61	0.8
5	82751700	82751725	25	82751712	11	11	1.6
5	82850950	82850975	25	82850962	11	11	0.8
5	83362975	83363275	300	83363037	14	147	0
5	85388275	85388425	150	85388337	16	84	0
5	86314175	86314600	425	86314412	19	251	29.7
5	86462600	86462925	325	86462762	43	362	5.5
5	86646300	86646775	475	86646662	17	221	7.8
5	86761050	86761250	200	86761112	14	96	0
5	87310200	87310325	125	87310237	14	61	0
5	90118350	90118650	300	90118487	48	393	13.3
5	90776700	90777000	300	90776862	44	360	28.2
5	91358475	91359025	550	91358812	237	2240	35.2
5	91769700	91770025	325	91769862	34	291	24.3
5	92189850	92189950	100	92189862	12	47	7.8
5	92520225	92520275	50	92520237	12	24	3.1
5	92651975	92652350	375	92652162	69	616	19.6
5	92984350	92984625	275	92984512	31	261	14.1
5	93272525	93272775	250	93272662	32	243	5.5
5	93452725	93452850	125	93452812	15	67	0
5	93615000	93615200	200	93615062	16	112	0.8
5	93679875	93680025	150	93679937	19	105	8.6
5	93754775	93754850	75	93754812	12	34	0
5	96278200	96278350	150	96278312	19	100	4.7
5	96498750	96498825	75	96498787	12	34	3.9
5	99104350	99104375	25	99104362	12	12	1.6
5	99216350	99216825	475	99216562	330	3041	50.1
5	99744850	99745225	375	99745037	102	868	32.9
5	100349250	100349425	175	100349337	13	83	7.8
5	100350225	100350575	350	100350362	34	329	33.6
5	102088525	102088675	150	102088562	12	68	8.6
5	102173425	102173450	25	102173437	11	11	1.6
5	102710700	102710825	125	102710787	14	62	0
5	102967350	102967550	200	102967387	19	130	3.1
5	103238950	103239125	175	103239037	19	98	3.9
5	103401000	103401225	225	103401112	23	164	20.3
5	103401500	103401850	350	103401687	28	285	25
5	103431975	103432250	275	103432137	27	211	6.3
5	103799525	103799650	125	103799612	17	70	4.7
5	104012525	104012650	125	104012537	11	52	1.6
5	104312725	104312875	150	104312762	15	78	7
5	104350575	104350650	75	104350637	12	34	3.1
5	104351825	104351925	100	104351912	14	50	8.6
5	104355625	104355650	25	104355637	11	11	1.6
5	105679950	105680250	300	105680087	41	336	21.9
5	107388550	107388575	25	107388562	30	30	4.7
5	108087725	108087825	100	108087737	11	42	3.1
5	108140725	108140850	125	108140787	14	65	5.5
5	109790250	109790275	25	109790262	11	11	0
5	109797900	109799150	1250	109798362	405	9732	173.7
5	110657175	110657225	50	110657212	17	33	6.3
5	110821175	110821500	325	110821337	44	384	18
5	111113625	111113700	75	111113637	12	34	0.8
5	111394900	111395075	175	111395037	23	134	12.5
5	111609200	111609300	100	111609212	12	47	1.6
5	111759850	111759975	125	111759862	13	58	10.2
5	111921650	111922025	375	111921837	52	507	38.3
5	111965100	111965375	275	111965212	29	224	29.7
5	111981350	111981550	200	111981437	21	145	11.7
5	112002250	112002650	400	112002462	126	1160	17.2
5	112047175	112047525	350	112047362	45	363	13.3
5	112142250	112142275	25	112142262	12	12	0.8
5	112158000	112158200	200	112158112	19	122	5.5
5	112373675	112374250	575	112374087	31	420	48.5
5	112612250	112612625	375	112612437	97	840	58.7
5	112623500	112623650	150	112623637	17	86	15.7
5	112725350	112725375	25	112725362	11	11	0.8
5	112791025	112791350	325	112791187	88	728	17.2
5	112792350	112792375	25	112792362	11	11	0.8
5	112805950	112806025	75	112805962	12	36	2.3
5	113065475	113065750	275	113065587	38	284	22.7
5	113182525	113182925	400	113182737	143	1269	29
5	113281800	113281900	100	113281887	16	57	10.2
5	114134450	114134600	150	114134537	12	68	12.5
5	114434100	114434300	200	114434112	23	135	18
5	115066050	115066125	75	115066062	11	33	2.3
5	115183350	115183525	175	115183462	30	184	36.8
5	115750575	115750675	100	115750612	15	52	2.3
5	115751225	115751575	350	115751362	24	251	18
5	116176575	116176700	125	116176662	16	69	7
5	116629225	116629250	25	116629237	11	11	0
5	117545300	117545375	75	117545312	13	37	6.3
5	118350400	118350450	50	118350412	14	28	4.7
5	118530200	118530275	75	118530262	14	39	7
5	118582875	118582925	50	118582887	12	24	1.6
5	118764250	118764325	75	118764312	12	34	4.7
5	121323675	121323750	75	121323712	12	35	6.3
5	121568225	121568500	275	121568362	36	264	8.6
5	121649825	121650200	375	121650012	137	1169	43.8
5	122044725	122044800	75	122044737	15	40	7
5	122763250	122763500	250	122763337	24	189	25
5	122904400	122904625	225	122904512	23	160	13.3
5	123160850	123161200	350	123161012	121	1002	25
5	123280300	123280600	300	123280412	35	292	23.5
5	123411925	123412125	200	123412012	29	185	17.2
5	123758725	123759075	350	123758887	43	404	9.4
5	123867775	123867950	175	123867812	22	127	5.5
5	123945075	123945275	200	123945162	21	150	12.5
5	124083600	124083650	50	124083612	17	29	3.1
5	124280200	124280375	175	124280262	22	120	20.3
5	124444875	124445025	150	124444937	25	137	21.1
5	124446200	124446225	25	124446212	12	12	2.3
5	124448525	124448625	100	124448612	22	72	12.5
5	124530275	124530350	75	124530287	12	36	0.8
5	124611550	124611775	225	124611712	38	265	33.6
5	125211950	125212300	350	125212137	25	252	14.9
5	125608150	125608300	150	125608237	15	80	12.5
5	125683225	125683550	325	125683337	25	250	22.7
5	128797750	128798000	250	128797862	25	192	7
5	128890775	128890925	150	128890887	20	93	10.2
5	130076875	130076900	25	130076887	12	12	2.3
5	130344925	130345100	175	130345037	19	108	11
5	130615925	130616225	300	130616087	43	330	36
5	132060075	132060400	325	132060262	32	267	26.6
5	132514500	132514575	75	132514562	16	41	4.7
5	132515100	132515125	25	132515112	12	12	0.8
5	132773850	132774000	150	132773937	16	81	5.5
5	132794325	132794450	125	132794337	12	57	0
5	133738525	133738550	25	133738537	13	13	2.3
5	134720625	134720775	150	134720687	14	79	9.4
5	134805725	134806150	425	134805937	187	1741	17.2
5	135744850	135745175	325	135745037	23	219	24.3
5	135774150	135774175	25	135774162	12	12	2.3
5	135792225	135792600	375	135792412	34	331	7
5	136063250	136063300	50	136063287	13	24	3.1
5	136483500	136483925	425	136483687	114	1072	45.4
5	136642025	136642100	75	136642037	11	33	2.3
5	136712350	136712375	25	136712362	11	11	0.8
5	137075600	137075700	100	137075637	12	46	5.5
5	137274000	137274025	25	137274012	11	11	0.8
5	137537600	137537625	25	137537612	12	12	2.3
5	137579550	137579775	225	137579662	34	250	22.7
5	137994375	137994575	200	137994537	28	173	7.8
5	138016525	138016850	325	138016687	80	656	31.3
5	138115850	138116100	250	138115987	28	214	15.7
5	138196350	138196500	150	138196437	14	74	9.4
5	138510100	138510225	125	138510137	24	101	15.7
5	139194950	139195200	250	139195062	29	201	0
5	139642875	139642975	100	139642912	15	54	3.9
5	140144825	140145575	750	140145212	387	3648	53.2
5	140347600	140348100	500	140347887	405	3865	49.3
5	140371350	140371750	400	140371562	92	842	42.3
5	140574600	140574675	75	140574612	12	34	3.9
5	140779225	140779575	350	140779412	67	579	0
5	140795925	140796000	75	140795937	14	38	6.3
5	140802275	140802300	25	140802287	12	12	2.3
5	140901825	140901975	150	140901937	15	77	8.6
5	140996200	140996350	150	140996212	16	84	16.4
5	141043300	141043325	25	141043312	11	11	1.6
5	141822975	141823150	175	141823012	13	84	2.3
5	142754475	142754625	150	142754612	14	75	2.3
5	142803975	142804100	125	142804012	15	66	7
5	143142650	143142675	25	143142662	11	11	1.6
5	143163650	143163675	25	143163662	13	13	2.3
5	143167700	143167725	25	143167712	14	14	2.3
5	143172650	143172775	125	143172687	12	56	0
5	143330425	143330800	375	143330612	35	362	25
5	143924475	143924850	375	143924662	137	1205	14.9
5	144337000	144337425	425	144337212	452	3994	21.9
5	144665400	144665725	325	144665562	37	300	32.9
5	147465950	147466100	150	147466062	17	99	19.6
5	149316975	149317200	225	149317162	36	208	27.4
5	149494100	149494125	25	149494112	12	12	1.6
5	149494625	149494675	50	149494637	12	23	3.9
5	149648750	149648925	175	149648837	16	96	10.2
5	149835550	149835800	250	149835662	42	305	14.1
5	150838875	150839325	450	150839087	130	1204	14.1
5	151053550	151053825	275	151053687	28	218	2.3
5	151420000	151420250	250	151420112	19	144	7.8
5	151487075	151487425	350	151487237	34	323	21.9
5	151673950	151674075	125	151674037	13	58	1.6
4	3017350	3017500	150	3017437	32	165	29.7
4	3017900	3017925	25	3017912	35	35	6.3
4	3618700	3619100	400	3618912	103	890	0
4	6714075	6714450	375	6714262	59	516	0
4	8301700	8301750	50	8301737	13	25	4.7
4	8623925	8623950	25	8623937	13	13	2.3
4	8726750	8726850	100	8726812	13	48	5.5
4	8765475	8765775	300	8765637	36	308	21.1
4	8777450	8777850	400	8777637	63	615	52.4
4	8838925	8839125	200	8838987	13	95	9.4
4	8938150	8938400	250	8938312	27	203	28.2
4	8943550	8943850	300	8943712	66	555	16.4
4	9233050	9233125	75	9233112	20	45	6.3
4	9522800	9522900	100	9522862	12	45	6.3
4	9570850	9570950	100	9570887	14	52	7.8
4	10284850	10284900	50	10284862	13	24	0
4	10900075	10900525	450	10900262	91	957	41.5
4	11747600	11747925	325	11747762	40	339	9.4
4	11816425	11816750	325	11816587	18	190	16.4
4	12261700	12262050	350	12261862	68	601	6.3
4	12556600	12556775	175	12556687	14	87	0.8
4	12727050	12727175	125	12727062	12	57	0
4	13338525	13338700	175	13338587	14	88	4.7
4	13470000	13470125	125	13470087	13	61	3.1
4	13724150	13724450	300	13724312	36	305	3.1
4	15105925	15106100	175	15106012	18	110	3.1
4	15212675	15212750	75	15212687	11	33	0
4	15648475	15648550	75	15648487	11	33	0
4	20407800	20408175	375	20407987	132	1147	25.8
4	20433925	20433975	50	20433962	12	23	3.1
4	20434300	20434475	175	20434462	16	90	18
4	20540900	20541100	200	20541012	23	149	12.5
4	20868300	20868425	125	20868337	13	59	2.3
4	22120825	22120925	100	22120887	14	51	1.6
4	22157750	22157950	200	22157837	17	118	6.3
4	22186675	22186700	25	22186687	12	12	2.3
4	22193250	22193650	400	22193437	50	548	22.7
4	22655325	22655475	150	22655412	14	79	11
4	22926225	22926275	50	22926237	12	23	3.1
4	22926825	22926850	25	22926837	14	14	2.3
4	24520175	24520425	250	24520312	25	183	0
4	24887050	24887450	400	24887262	52	487	24.3
4	25018850	25019100	250	25019037	58	422	37.6
4	25032600	25032950	350	25032762	24	247	3.9
4	28233775	28234075	300	28233912	39	307	6.3
4	28345725	28345750	25	28345737	15	15	1.6
4	28983775	28983850	75	28983787	12	35	2.3
4	29286850	29286900	50	29286887	12	23	1.6
4	31102225	31102525	300	31102387	32	243	0
4	32367550	32367675	125	32367562	13	59	1.6
4	32566475	32566500	25	32566487	11	11	1.6
4	32572700	32573075	375	32572887	92	791	34.4
4	32808525	32808850	325	32808662	51	456	11
4	32859600	32859825	225	32859737	25	170	15.7
4	33252175	33252225	50	33252187	12	23	3.1
4	33590375	33590475	100	33590387	13	50	6.3
4	33971200	33971400	200	33971312	19	123	2.3
4	34116425	34116800	375	34116612	107	968	18
4	34500000	34500025	25	34500012	11	11	1.6
4	34575600	34575700	100	34575662	12	45	4.7
4	35735125	35735175	50	35735137	11	22	1.6
4	35935600	35935950	350	35935762	52	464	12.5
4	35960425	35960575	150	35960462	16	86	0
4	36593225	36593250	25	36593237	11	11	0
4	40946475	40946675	200	40946637	26	149	14.9
4	41137650	41137850	200	41137737	22	140	1.6
4	41366800	41366825	25	41366812	11	11	0.8
4	41478875	41478900	25	41478887	18	18	3.1
4	41501800	41501825	25	41501812	11	11	1.6
4	41659425	41659725	300	41659487	34	289	25.8
4	41711700	41711875	175	41711762	14	84	1.6
4	41758050	41758425	375	41758237	83	718	43
4	41895675	41896250	575	41895912	165	1663	73.6
4	43415100	43415375	275	43415262	27	222	11.7
4	43463125	43463150	25	43463137	11	11	0.8
4	43530325	43530350	25	43530337	13	13	2.3
4	44548300	44548450	150	44548337	28	133	15.7
4	44926825	44926850	25	44926837	11	11	1.6
4	45230225	45230450	225	45230287	16	115	4.7
4	45488950	45489000	50	45488962	11	22	2.3
4	45494350	45494600	250	45494512	27	204	7
4	45552225	45552350	125	45552262	15	68	7
4	45760250	45760600	350	45760437	38	365	16.4
4	45840725	45840775	50	45840737	14	26	3.9
4	45989200	45989225	25	45989212	11	11	1.6
4	46752750	46752975	225	46752862	21	150	5.5
4	47247000	47247400	400	47247187	322	2786	31.3
4	47337400	47337550	150	47337487	17	83	7.8
4	47720450	47720475	25	47720462	11	11	1.6
4	48308650	48308725	75	48308687	12	34	4.7
4	48775875	48776200	325	48776037	36	328	40.7
4	49042900	49042925	25	49042912	12	12	0
4	49315875	49316125	250	49315987	31	223	0
4	49709625	49710225	600	49709812	79	887	11.7
4	49806100	49806250	150	49806187	19	103	3.9
4	49848225	49848300	75	49848262	13	36	2.3
4	49934700	49935100	400	49934912	65	617	6.3
4	52231975	52232525	550	52232287	57	801	18.8
4	52579225	52579425	200	52579337	20	120	0
4	53171550	53171900	350	53171712	47	392	23.5
4	54392925	54393125	200	54393012	18	122	9.4
4	54658350	54658475	125	54658362	17	72	11
4	54669450	54669600	150	54669512	17	90	7.8
4	54915025	54915125	100	54915037	11	44	0
4	55169500	55169725	225	55169562	19	144	20.3
4	55742725	55742950	225	55742812	19	141	19.6
4	55752450	55752500	50	55752462	11	22	0
4	56022300	56022675	375	56022512	67	609	32.9
4	56134975	56135250	275	56135062	38	310	34.4
4	56148875	56149350	475	56149062	50	554	31.3
4	56165050	56165425	375	56165212	22	234	7.8
4	56200050	56200225	175	56200137	18	101	7
4	56470000	56470075	75	56470012	16	42	2.3
4	56601800	56601975	175	56601937	15	92	12.5
4	56691475	56691500	25	56691487	11	11	0.8
4	56705950	56706225	275	56706062	28	226	7
4	56738250	56738500	250	56738337	26	197	25
4	57048575	57048700	125	57048612	13	62	11
4	57857925	57858050	125	57858037	14	64	7
4	58144600	58145175	575	58145037	30	399	68.1
4	58341300	58341650	350	58341487	48	425	0
4	59004975	59005125	150	59005062	16	87	3.1
4	59190600	59190625	25	59190612	11	11	0.8
4	59203600	59203625	25	59203612	11	11	0
4	59679100	59679425	325	59679262	44	379	17.2
4	61761475	61761800	325	61761487	12	134	26.6
4	61895375	61895775	400	61895587	194	1767	39.1
4	62149625	62149875	250	62149762	40	279	30.5
4	62357125	62357400	275	62357262	24	192	13.3
4	62712900	62713150	250	62713012	23	173	19.6
4	62889900	62890000	100	62889912	12	46	7.8
4	63233550	63233675	125	63233587	14	61	0
4	63334025	63334175	150	63334112	14	76	0
4	63635400	63635675	275	63635587	17	151	21.9
4	63711400	63711625	225	63711537	23	155	1.6
4	63816700	63817000	300	63816812	16	155	16.4
4	63937975	63938650	675	63938437	136	1386	61
4	63984075	63984275	200	63984212	16	107	12.5
4	65186325	65186725	400	65186512	109	1015	10.2
4	65325750	65326400	650	65326187	347	3326	38.3
4	65817050	65817250	200	65817112	16	110	13.3
4	65968875	65968950	75	65968937	13	37	5.5
4	65969850	65969875	25	65969862	11	11	0
4	66029325	66029525	200	66029387	19	128	2.3
4	69806875	69806950	75	69806887	11	33	4.7
4	69898525	69898900	375	69898637	21	253	22.7
4	70716250	70716425	175	70716362	17	107	10.2
4	70792050	70792175	125	70792087	12	59	0
4	70970775	70970800	25	70970787	11	11	0
4	71251375	71251575	200	71251512	14	94	8.6
4	71749725	71749925	200	71749812	17	109	0
4	71871475	71871600	125	71871512	15	68	3.9
4	72286475	72286625	150	72286562	14	73	0
4	73239575	73239625	50	73239587	12	23	3.9
4	73249550	73249675	125	73249562	11	51	0
4	73491375	73491600	225	73491512	19	132	14.9
4	73548100	73548150	50	73548112	12	23	1.6
4	74684050	74684475	425	74684287	305	2853	29
4	75346900	75347100	200	75346987	17	115	0
4	75625550	75625825	275	75625737	15	142	11
4	75667425	75667675	250	75667537	27	209	0
4	76540900	76541075	175	76540962	17	106	7.8
4	76755075	76755175	100	76755137	13	48	0
4	80822575	80822975	400	80822762	211	1811	0
4	81039325	81039675	350	81039437	97	884	12.5
4	81198250	81198275	25	81198262	12	12	2.3
4	81198650	81198700	50	81198662	11	22	0.8
4	81233725	81234125	400	81233912	135	1190	43.8
4	81394200	81394500	300	81394337	37	327	21.9
4	81774600	81774950	350	81774787	60	512	9.4
4	81816175	81816375	200	81816262	18	121	9.4
4	81908875	81909100	225	81908937	21	146	1.6
4	81918550	81918850	300	81918712	39	329	20.3
4	81982725	81982925	200	81982837	25	170	15.7
4	82175625	82176250	625	82175787	27	405	18
4	82237000	82237325	325	82237137	15	180	18
4	82387100	82387475	375	82387287	30	321	39.1
4	82794725	82794750	25	82794737	11	11	0.8
4	83302450	83302650	200	83302562	16	105	2.3
4	83649100	83649225	125	83649162	13	61	0
4	83828750	83828900	150	83828837	15	83	3.9
4	84141325	84141675	350	84141487	68	579	0
4	84721600	84721625	25	84721612	12	12	2.3
4	84732525	84732875	350	84732712	25	276	46.2
4	84957600	84957900	300	84957887	15	159	31.3
4	85086675	85086750	75	85086687	12	34	3.9
4	85178650	85178725	75	85178687	15	40	5.5
4	85179025	85179100	75	85179037	15	40	5.5
4	85491925	85492250	325	85492062	46	390	39.9
4	85661175	85661375	200	85661212	14	97	3.9
4	86047550	86047600	50	86047562	11	22	0.8
4	86769350	86769675	325	86769512	34	300	6.3
4	86842050	86842200	150	86842162	14	76	3.9
4	87119850	87119950	100	87119862	12	47	7.8
4	87354400	87354825	425	87354587	153	1412	46.2
4	88512100	88512425	325	88512287	42	374	11.7
4	90867725	90868000	275	90867837	24	189	17.2
4	93602275	93602500	225	93602412	23	169	0
4	93974875	93974975	100	93974912	12	46	4.7
4	94839000	94839125	125	94839062	12	56	6.3
4	95323275	95323525	250	95323387	20	155	0
4	95581725	95581925	200	95581837	17	117	0
4	96073925	96074000	75	96073937	13	38	7
4	96289700	96289900	200	96289762	13	97	6.3
4	96648100	96648475	375	96648287	83	732	32.9
4	96685400	96685425	25	96685412	11	11	0
4	96910575	96910650	75	96910612	12	35	6.3
4	96923425	96923500	75	96923437	12	34	4.7
4	96931700	96931725	25	96931712	11	11	1.6
4	96958150	96958475	325	96958337	24	228	9.4
4	96972800	96972825	25	96972812	11	11	0.8
4	97127450	97127475	25	97127462	12	12	2.3
4	97139500	97139975	475	97139787	25	322	32.1
4	97141300	97141700	400	97141512	63	637	46.2
4	97153625	97154025	400	97153837	134	1231	12.5
4	97183525	97183750	225	97183637	21	143	7.8
4	97386050	97386175	125	97386062	13	60	3.9
4	97600625	97600850	225	97600762	23	165	7.8
4	98055850	98055925	75	98055912	12	34	3.1
4	99428100	99428375	275	99428212	53	416	22.7
4	99658125	99658500	375	99658312	51	470	6.3
4	100143925	100143950	25	100143937	11	11	0
4	100162925	100163100	175	100163037	15	91	6.3
4	100411600	100412075	475	100411837	429	3859	6.3
4	100643925	100644300	375	100644087	61	580	18
4	100758125	100758225	100	100758162	13	48	6.3
4	101468275	101468475	200	101468337	27	167	11.7
4	101646675	101646700	25	101646687	11	11	1.6
4	101737075	101737400	325	101737212	49	424	0
4	101752500	101753000	500	101752812	99	1051	34.4
4	101754600	101754675	75	101754637	12	34	0.8
4	101773300	101773600	300	101773462	47	383	18
4	101911700	101912100	400	101911912	31	366	21.9
4	102026300	102026400	100	102026387	12	45	1.6
4	102032000	102032650	650	102032437	41	650	59.5
4	102066950	102067275	325	102067112	49	416	30.5
4	102072250	102072450	200	102072312	21	150	16.4
4	102086850	102086900	50	102086862	13	25	3.9
4	102302900	102302925	25	102302912	11	11	1.6
4	102338800	102339125	325	102338962	34	276	18.8
4	102566250	102566350	100	102566262	14	52	3.1
4	103335125	103335450	325	103335287	48	410	25
4	103339075	103339500	425	103339287	150	1430	25
4	103395600	103395975	375	103395787	82	713	1.6
4	103572175	103572225	50	103572187	12	23	1.6
4	103768150	103768375	225	103768287	20	132	0
4	103897450	103897500	50	103897462	11	22	3.1
4	104186975	104187200	225	104187062	22	164	14.9
4	104215400	104215425	25	104215412	11	11	0
4	104591850	104592250	400	104592062	95	843	6.3
4	104668275	104668475	200	104668362	19	121	11.7
4	104678925	104679350	425	104679162	20	271	53.2
4	104949575	104949675	100	104949587	11	42	0
4	105730175	105730300	125	105730212	15	66	8.6
4	106662075	106662150	75	106662137	16	42	3.1
4	106747275	106747375	100	106747312	17	60	3.1
4	107043800	107043875	75	107043812	11	33	3.1
4	107178775	107179100	325	107178862	28	272	26.6
4	108332275	108332525	250	108332387	23	189	25
4	108405500	108405650	150	108405587	14	74	5.5
4	108604050	108604125	75	108604087	15	44	2.3
4	108722950	108723200	250	108723087	19	148	14.9
4	109120575	109120825	250	109120737	27	207	0
4	109202050	109202300	250	109202162	20	168	21.1
4	110942300	110942400	100	110942362	12	46	2.3
4	111095275	111095600	325	111095462	64	537	44.6
4	112288625	112288800	175	112288712	15	90	6.3
4	113994025	113994175	150	113994087	16	82	3.1
4	114176275	114176450	175	114176312	24	141	14.9
4	114536325	114536350	25	114536337	11	11	0
4	114577950	114578150	200	114578062	22	153	22.7
[truncated: 4,575 more rows]

## Sheet: SOX2 Day2 Diff. TetO-Brn2
CHROM	START	END	LENGTH	PEAK POS	PEAK HEIGHT	TOTAL TARGET COUNTS	TOTAL BACKGROUND COUNTS
1	3052975	3053150	175	3053012	23	142	5.2
1	3472900	3473375	475	3473037	50	645	85.3
1	3639225	3639275	50	3639237	26	51	9.6
1	3671475	3671600	125	3671487	22	105	14.1
1	3671825	3671850	25	3671837	19	19	3.7
1	3904175	3904525	350	3904337	52	523	14.8
1	4561900	4562050	150	4561912	19	101	17.8
1	4792650	4792825	175	4792662	31	184	25.2
1	4798000	4798025	25	4798012	18	18	3
1	4924275	4924450	175	4924312	29	190	20.8
1	4962475	4962700	225	4962562	33	237	17.1
1	5012925	5012950	25	5012937	23	23	4.5
1	5127325	5127350	25	5127337	19	19	3.7
1	5131875	5131900	25	5131887	18	18	2.2
1	5222475	5223200	725	5223062	58	861	144
1	6049150	6049400	250	6049162	18	173	20.8
1	6272500	6272525	25	6272512	19	19	3.7
1	6438000	6438050	50	6438012	18	36	5.2
1	6438650	6439100	450	6439012	51	618	50.5
1	6448050	6448425	375	6448187	39	432	49
1	7303350	7303675	325	7303512	64	560	55.7
1	7309325	7309550	225	7309512	47	356	36.4
1	7441675	7441875	200	7441787	30	199	17.1
1	7484100	7484125	25	7484112	19	19	3.7
1	7661525	7661800	275	7661637	24	224	28.2
1	7722750	7722975	225	7722837	43	304	24.5
1	8486275	8486575	300	8486462	72	639	46
1	8571850	8572100	250	8571962	43	321	36.4
1	8925950	8926250	300	8926137	32	286	43.8
1	9046300	9046375	75	9046337	22	61	6.7
1	9685450	9685525	75	9685512	31	86	15.6
1	9929275	9929400	125	9929312	25	110	17.8
1	9938525	9938550	25	9938537	19	19	2.2
1	10462100	10462125	25	10462112	23	23	4.5
1	10839825	10839925	100	10839887	23	90	10.4
1	11009975	11010075	100	11010012	26	92	10.4
1	11067400	11067625	225	11067512	34	236	26
1	11081625	11081650	25	11081637	18	18	3
1	11236450	11236625	175	11236487	25	156	18.6
1	11262975	11263300	325	11263137	58	522	53.4
1	11315350	11315375	25	11315362	19	19	3
1	11320500	11320600	100	11320562	19	74	9.6
1	11380875	11380900	25	11380887	18	18	3
1	11409450	11409475	25	11409462	18	18	1.5
1	11733650	11734100	450	11733837	33	444	54.2
1	12010975	12011225	250	12011137	43	359	32.7
1	12281350	12281475	125	12281462	19	86	11.9
1	12539750	12539800	50	12539762	18	36	5.2
1	12677225	12677425	200	12677262	37	255	36.4
1	12696000	12696150	150	12696062	23	123	11.1
1	12729800	12730400	600	12730087	64	1201	140.3
1	12795750	12795775	25	12795762	18	18	3
1	12799775	12799850	75	12799837	30	86	16.3
1	12820550	12820575	25	12820562	19	19	3.7
1	12821400	12821475	75	12821412	36	97	16.3
1	12872050	12872125	75	12872062	21	60	11.9
1	13044950	13045075	125	13045012	27	119	17.1
1	13059575	13059875	300	13059762	56	517	51.2
1	13070025	13070375	350	13070187	64	696	99.4
1	13440875	13441025	150	13440937	25	134	10.4
1	13923625	13923825	200	13923662	22	162	19.3
1	13986400	13986525	125	13986462	23	106	11.9
1	14210725	14211050	325	14210887	52	479	54.2
1	14218575	14218775	200	14218637	28	174	22.3
1	14551800	14551950	150	14551887	22	123	20.8
1	14611900	14611925	25	14611912	19	19	2.2
1	14616625	14616650	25	14616637	19	19	2.2
1	14635700	14635825	125	14635712	20	98	18.6
1	15635125	15635175	50	15635137	19	38	7.4
1	15774400	15774425	25	15774412	19	19	3
1	15776875	15777150	275	15776962	39	373	48.2
1	16115125	16115725	600	16115362	86	1045	112.8
1	16672650	16672800	150	16672712	25	129	11.1
1	17235950	17236025	75	17235987	20	58	5.2
1	18090575	18091025	450	18090837	38	528	51.9
1	18092000	18092025	25	18092012	19	19	2.2
1	18208800	18209100	300	18208962	34	300	33.4
1	18272525	18272875	350	18272687	54	530	79.4
1	20852500	20852700	200	20852637	53	343	36.4
1	20853250	20853400	150	20853337	32	176	31.2
1	20893675	20894025	350	20893937	47	487	48.2
1	20940100	20940250	150	20940162	23	128	15.6
1	20959850	20960250	400	20960087	58	607	78.7
1	22362575	22362600	25	22362587	18	18	3
1	22363350	22363475	125	22363437	22	100	8.2
1	22421000	22421300	300	22421112	55	477	17.8
1	22463850	22464050	200	22463987	27	196	26
1	23117150	23117200	50	23117162	19	37	6.7
1	23157325	23157350	25	23157337	18	18	2.2
1	23211025	23211125	100	23211062	21	80	7.4
1	24054850	24054975	125	24054887	28	129	18.6
1	24706000	24706050	50	24706012	20	38	5.9
1	25126375	25126625	250	25126512	69	549	36.4
1	26227700	26227775	75	26227737	23	65	11.1
1	26852550	26852775	225	26852612	31	229	30.4
1	29953475	29953775	300	29953612	40	371	25.2
1	30359600	30359800	200	30359712	24	166	13.4
1	30493175	30493200	25	30493187	19	19	0.7
1	30701400	30701575	175	30701437	27	176	7.4
1	30749600	30749800	200	30749662	53	363	46
1	30894350	30894500	150	30894437	32	168	28.2
1	33500325	33500400	75	33500387	24	63	6.7
1	33684125	33684200	75	33684137	20	58	8.2
1	33951325	33951375	50	33951337	20	39	6.7
1	33951650	33951800	150	33951687	45	247	39.3
1	34007100	34007125	25	34007112	26	26	5.2
1	34015950	34016000	50	34015962	19	38	5.2
1	34018975	34019250	275	34019087	61	517	66
1	34021775	34021850	75	34021787	26	72	11.1
1	34022275	34022300	25	34022287	20	20	3
1	34045025	34045050	25	34045037	19	19	2.2
1	34048450	34048650	200	34048487	64	419	52.7
1	34085350	34085425	75	34085362	27	76	11.9
1	34128050	34128325	275	34128162	35	313	26
1	34377375	34377400	25	34377387	20	20	3
1	34379250	34379325	75	34379312	30	73	11.1
1	34413175	34413350	175	34413212	31	186	29.7
1	34481675	34481700	25	34481687	19	19	3.7
1	35060025	35060525	500	35060212	35	511	37.8
1	35163925	35164200	275	35164037	26	239	33.4
1	35177100	35177550	450	35177462	58	815	103.2
1	35642500	35642725	225	35642612	43	298	40.8
1	35889100	35889125	25	35889112	21	21	3.7
1	35959125	35959175	50	35959137	23	42	8.2
1	36005650	36006100	450	36005862	109	1190	106.1
1	36009550	36009675	125	36009562	43	176	34.1
1	36196100	36196225	125	36196162	53	248	34.1
1	36458275	36458300	25	36458287	27	27	5.2
1	36501750	36501800	50	36501762	27	52	9.6
1	36884475	36884550	75	36884487	27	78	14.1
1	36928725	36928775	50	36928737	19	37	5.2
1	36930425	36930800	375	36930562	165	1486	178.1
1	36931500	36931700	200	36931662	46	299	37.1
1	36932400	36932675	275	36932537	49	420	44.5
1	36949225	36949250	25	36949237	18	18	3
1	36993800	36994000	200	36993912	28	180	15.6
1	37155525	37155625	100	37155587	22	83	16.3
1	37834900	37835075	175	37835012	58	341	58.6
1	38078725	38078800	75	38078737	31	91	17.1
1	38264475	38264500	25	38264487	20	20	3
1	38366625	38366800	175	38366662	22	142	12.6
1	38412500	38412600	100	38412562	22	81	6.7
1	38741400	38742050	650	38741487	57	887	117.3
1	39014750	39014900	150	39014787	22	122	14.1
1	39067275	39067425	150	39067337	29	159	23.7
1	39154550	39154575	25	39154562	19	19	3
1	39472875	39473100	225	39473012	61	428	50.5
1	39645150	39645400	250	39645237	31	267	14.1
1	39706825	39706875	50	39706837	20	38	0
1	40610175	40610400	225	40610312	39	275	44.5
1	41085125	41085400	275	41085287	48	396	24.5
1	41334850	41335125	275	41334962	48	407	32.7
1	42003075	42003425	350	42003237	57	532	37.1
1	42052000	42052200	200	42052087	33	239	31.9
1	42657975	42658050	75	42658037	22	61	11.9
1	43038900	43039000	100	43038937	22	81	9.6
1	43130900	43131075	175	43130912	25	160	23
1	43515750	43515825	75	43515762	19	57	11.1
1	44092500	44092575	75	44092512	30	90	17.1
1	44512825	44513025	200	44512937	23	164	17.8
1	44557775	44557875	100	44557862	21	79	12.6
1	44558175	44558200	25	44558187	23	23	4.5
1	44836200	44836450	250	44836337	53	419	27.5
1	45245250	45245425	175	45245337	23	156	17.1
1	45302650	45302850	200	45302762	26	172	20.8
1	45519800	45519975	175	45519887	25	158	18.6
1	45870300	45870425	125	45870337	21	101	13.4
1	46797875	46797925	50	46797887	31	61	7.4
1	46808125	46808225	100	46808137	21	79	9.6
1	46861000	46861150	150	46861037	26	143	26
1	46908700	46908725	25	46908712	18	18	2.2
1	47251600	47251875	275	47251737	44	386	17.8
1	50582700	50582850	150	50582712	27	138	24.5
1	50598175	50598300	125	50598212	22	104	14.8
1	51360100	51360300	200	51360237	21	150	16.3
1	51453100	51453175	75	51453137	20	56	5.9
1	51480525	51480825	300	51480712	52	455	48.2
1	51581375	51581400	25	51581387	30	30	5.9
1	51740850	51740925	75	51740887	21	60	8.9
1	51953875	51953925	50	51953887	34	66	12.6
1	52058275	52058475	200	52058412	44	289	48.2
1	52176675	52176700	25	52176687	18	18	3
1	52177550	52177700	150	52177687	34	143	20.8
1	52440600	52440700	100	52440637	19	73	6.7
1	52472250	52472475	225	52472312	34	273	30.4
1	52601300	52601325	25	52601312	35	35	5.9
1	52702750	52703000	250	52702887	34	283	12.6
1	52789675	52789750	75	52789687	27	74	13.4
1	52808875	52809100	225	52808962	52	392	44.5
1	52897900	52898350	450	52898212	101	1177	132.1
1	53135925	53135950	25	53135937	18	18	3
1	53140750	53140850	100	53140762	18	72	7.4
1	53154775	53154950	175	53154862	26	155	28.9
1	53241250	53241400	150	53241312	25	136	25.2
1	53525900	53526100	200	53525987	32	227	14.1
1	53651200	53651225	25	53651212	18	18	3
1	53694525	53694725	200	53694637	40	255	28.2
1	53729500	53729525	25	53729512	26	26	5.2
1	54195025	54195300	275	54195162	107	841	68.3
1	54328525	54328675	150	54328662	19	105	11.1
1	54328925	54329100	175	54328962	27	165	29.7
1	54344225	54344400	175	54344312	31	194	26.7
1	54383525	54383650	125	54383562	40	172	31.2
1	54388275	54388425	150	54388287	24	122	22.3
1	54429375	54429800	425	54429662	106	1502	132.8
1	54500050	54500075	25	54500062	18	18	3
1	54530125	54530425	300	54530162	45	395	61.6
1	54789000	54789075	75	54789037	21	61	8.2
1	54971550	54971725	175	54971612	23	148	19.3
1	54972125	54972150	25	54972137	41	41	8.2
1	55032450	55032475	25	55032462	26	26	5.2
1	55053175	55053375	200	55053212	31	211	27.5
1	55075725	55075775	50	55075737	24	44	5.9
1	55150325	55150550	225	55150487	56	386	32.7
1	55610900	55611150	250	55611012	31	247	14.8
1	55918700	55919075	375	55918912	71	696	21.5
1	56613325	56613550	225	56613412	41	319	20
1	56628925	56629200	275	56629112	55	450	40.1
1	56642000	56642325	325	56642187	33	327	57.1
1	56668275	56668400	125	56668362	19	90	0
1	56789125	56789375	250	56789212	35	281	23
1	56920125	56920150	25	56920137	19	19	3.7
1	57303225	57303350	125	57303262	26	113	10.4
1	57351075	57351225	150	57351087	26	130	22.3
1	57473150	57473250	100	57473212	20	74	5.2
1	57551575	57551725	150	57551637	34	174	21.5
1	57556775	57556900	125	57556887	28	123	17.8
1	57663825	57663950	125	57663862	22	99	13.4
1	57914400	57914525	125	57914412	29	130	22.3
1	57933575	57933725	150	57933612	28	141	20
1	58337250	58337325	75	58337262	20	56	8.9
1	58368375	58368475	100	58368462	22	83	11.9
1	58515050	58515225	175	58515162	28	177	21.5
1	58634725	58634750	25	58634737	18	18	1.5
1	58913625	58913700	75	58913662	21	59	1.5
1	59164900	59165100	200	59164962	30	214	34.1
1	59192525	59192550	25	59192537	21	21	3.7
1	59320900	59320975	75	59320937	22	63	9.6
1	59367575	59368175	600	59367887	98	1390	113.5
1	59371425	59371550	125	59371462	27	117	14.1
1	59417225	59417325	100	59417312	37	136	21.5
1	59417550	59417775	225	59417662	36	276	17.8
1	59426800	59426825	25	59426812	24	24	3.7
1	59453000	59453025	25	59453012	29	29	4.5
1	59629225	59629300	75	59629287	23	59	8.9
1	59642375	59642475	100	59642462	22	79	14.1
1	59857200	59857275	75	59857237	25	71	11.9
1	59917725	59917750	25	59917737	19	19	2.2
1	60288000	60288025	25	60288012	20	20	3.7
1	60351350	60351375	25	60351362	19	19	1.5
1	60354000	60354025	25	60354012	19	19	3.7
1	60354450	60354475	25	60354462	19	19	3.7
1	60377150	60377175	25	60377162	19	19	3.7
1	60510700	60510725	25	60510712	19	19	3.7
1	60795425	60795575	150	60795562	30	156	27.5
1	60795900	60796025	125	60795912	36	170	26
1	60798100	60798225	125	60798162	26	121	14.1
1	61040050	61040300	250	61040162	82	640	58.6
1	61462900	61462950	50	61462937	22	40	3.7
1	62115900	62116550	650	62116137	99	1537	107.6
1	62332625	62332800	175	62332737	33	188	26.7
1	62498525	62498700	175	62498637	41	237	27.5
1	62701775	62701800	25	62701787	19	19	3.7
1	62717775	62718200	425	62718037	55	607	60.1
1	62766675	62766875	200	62766837	26	188	26
1	63000450	63000625	175	63000537	25	157	17.1
1	63064500	63064550	50	63064512	22	42	7.4
1	63111250	63111275	25	63111262	36	36	6.7
1	63148000	63148025	25	63148012	19	19	3.7
1	63267400	63267450	50	63267437	23	45	5.9
1	63376500	63376700	200	63376562	30	198	10.4
1	63602250	63602275	25	63602262	18	18	3
1	63762875	63763075	200	63762987	26	190	5.2
1	63887950	63888050	100	63887962	23	82	14.1
1	63943325	63943525	200	63943412	30	200	5.9
1	64056375	64056625	250	64056487	62	547	76.4
1	64237525	64237575	50	64237537	19	38	4.5
1	64237825	64237850	25	64237837	19	19	3.7
1	64355625	64355650	25	64355637	18	18	2.2
1	64511200	64511225	25	64511212	24	24	4.5
1	64589750	64589950	200	64589812	30	217	32.7
1	64624875	64625000	125	64624887	38	157	29.7
1	64667975	64668200	225	64668037	63	449	56.4
1	64714200	64714325	125	64714237	22	102	17.1
1	64738225	64738500	275	64738312	29	265	34.1
1	64819325	64819650	325	64819412	58	572	92
1	64851300	64851375	75	64851362	33	96	17.1
1	64852750	64852775	25	64852762	18	18	2.2
1	64916600	64916675	75	64916662	22	59	10.4
1	64947100	64947175	75	64947137	26	71	8.2
1	64971875	64972175	300	64971987	26	269	30.4
1	65000350	65000375	25	65000362	18	18	3
1	65227025	65227275	250	65227187	43	324	30.4
1	65305150	65305175	25	65305162	21	21	3.7
1	65356875	65357050	175	65356937	28	171	21.5
1	65734250	65734825	575	65734687	70	888	86.1
1	66144975	66145050	75	66144987	19	56	5.9
1	66282675	66282725	50	66282687	18	36	5.9
1	66361100	66361200	100	66361137	20	78	11.9
1	66376250	66376325	75	66376262	30	80	14.8
1	66456750	66456825	75	66456762	18	54	3
1	66633300	66633500	200	66633487	20	120	15.6
1	66634125	66634225	100	66634137	23	87	14.8
1	66750150	66750225	75	66750187	44	128	23
1	66845500	66845825	325	66845687	39	355	32.7
1	66894275	66894400	125	66894287	36	161	23
1	67344850	67345025	175	67344862	22	145	15.6
1	67869000	67869325	325	67869162	70	642	57.9
1	67903350	67903525	175	67903487	28	160	22.3
1	67980375	67980450	75	67980437	20	56	11.1
1	68008925	68009400	475	68009237	28	413	50.5
1	68713550	68713575	25	68713562	19	19	3
1	69063400	69063450	50	69063412	24	47	8.2
1	69801150	69801300	150	69801212	21	117	12.6
1	70723200	70723325	125	70723262	24	112	19.3
1	70739975	70740100	125	70740062	29	131	21.5
1	70968950	70969025	75	70968987	27	76	13.4
1	71190400	71190425	25	71190412	20	20	2.2
1	71318175	71318225	50	71318187	22	44	7.4
1	71381775	71381925	150	71381887	29	144	17.8
1	71440575	71440700	125	71440637	34	150	20.8
1	71579200	71579350	150	71579287	38	211	34.9
1	71606700	71606725	25	71606712	25	25	4.5
1	72046625	72046800	175	72046712	31	186	33.4
1	72106950	72107075	125	72106987	22	102	14.8
1	72147350	72147475	125	72147387	29	136	20
1	72162175	72162525	350	72162362	152	1438	138
1	72170450	72170525	75	72170512	28	77	9.6
1	72176025	72176225	200	72176137	62	444	38.6
1	72177325	72177600	275	72177387	35	333	46
1	72188225	72188450	225	72188387	30	203	23.7
1	72240375	72240450	75	72240387	31	84	15.6
1	72247025	72247075	50	72247037	18	36	5.9
1	72726100	72726750	650	72726562	140	1461	73.5
1	72730625	72730800	175	72730637	30	194	34.1
1	72739575	72739600	25	72739587	30	30	4.5
1	72744450	72744525	75	72744487	29	80	11.1
1	72878525	72878550	25	72878537	21	21	3
1	72893750	72893775	25	72893762	18	18	3
1	73372675	73372725	50	73372687	19	37	3.7
1	73433950	73434175	225	73434087	33	242	28.9
1	73576075	73576325	250	73576162	44	343	30.4
1	74044500	74044725	225	74044662	33	258	39.3
1	74178875	74178975	100	74178887	24	89	12.6
1	74320275	74320400	125	74320287	48	222	38.6
1	74707475	74707525	50	74707487	18	36	5.2
1	74748725	74748750	25	74748737	20	20	3
1	74758175	74758350	175	74758312	110	656	112.8
1	74884825	74884900	75	74884837	19	55	8.9
1	74960375	74960450	75	74960387	24	67	5.9
1	75093900	75093950	50	75093937	24	47	8.2
1	75102950	75103000	50	75102987	30	58	11.1
1	75227625	75227725	100	75227637	20	77	14.8
1	75264850	75264975	125	75264937	25	111	14.8
1	75370800	75370825	25	75370812	24	24	4.5
1	75442900	75442925	25	75442912	20	20	3.7
1	75472100	75472125	25	75472112	24	24	4.5
1	75499875	75500250	375	75500087	130	1203	83.1
1	75545625	75545725	100	75545687	26	97	16.3
1	75546050	75546250	200	75546187	28	198	31.9
1	75587975	75588025	50	75588012	21	41	7.4
1	75664575	75664775	200	75664687	29	197	20.8
1	75687625	75687900	275	75687787	42	344	24.5
1	75771775	75771975	200	75771887	28	200	28.9
1	75864125	75864875	750	75864637	57	1037	111.3
1	75880525	75880575	50	75880537	24	45	8.2
1	75912775	75912800	25	75912787	18	18	2.2
1	75919300	75919500	200	75919412	30	207	17.8
1	76790900	76791000	100	76790912	22	80	10.4
1	77323625	77323900	275	77323762	61	505	35.6
1	77324675	77324875	200	77324787	32	202	23
1	77328975	77329050	75	77328987	21	61	11.1
1	77335900	77336100	200	77335987	31	215	22.3
1	77337150	77337300	150	77337162	30	163	25.2
1	77339875	77340075	200	77339887	30	206	37.1
1	77355950	77356125	175	77355962	31	181	30.4
1	77378600	77378625	25	77378612	18	18	3
1	77396275	77396375	100	77396287	30	99	15.6
1	77427925	77427975	50	77427937	19	38	5.9
1	77431275	77431300	25	77431287	19	19	3.7
1	77512850	77513450	600	77513162	86	1217	158.8
1	77855225	77855350	125	77855262	21	95	8.2
1	78003100	78003425	325	78003237	74	683	49
1	78051250	78051400	150	78051312	25	143	22.3
1	78073900	78074075	175	78073937	30	199	35.6
1	79333300	79333550	250	79333437	34	288	34.1
1	79460225	79460475	250	79460287	37	311	58.6
1	79481575	79481750	175	79481687	26	146	15.6
1	79655025	79655225	200	79655112	41	270	32.7
1	79716975	79717250	275	79717087	43	344	20.8
1	79737450	79737600	150	79737462	20	95	14.1
1	79757550	79757700	150	79757562	20	108	9.6
1	80029800	80029950	150	80029887	35	192	26.7
1	80115225	80115400	175	80115337	33	190	26.7
1	80116350	80117100	750	80116612	195	2469	160.3
1	80166600	80166625	25	80166612	18	18	3
1	80194600	80195150	550	80194987	42	671	99.4
1	80282525	80282875	350	80282712	111	993	56.4
1	80501925	80502000	75	80501937	20	59	5.9
1	80555575	80555900	325	80555737	50	441	60.9
1	81016850	81016975	125	81016887	24	110	14.1
1	81424375	81424500	125	81424412	27	122	20
1	81456850	81456950	100	81456862	23	81	13.4
1	81472575	81472600	25	81472587	18	18	3
1	81488825	81488925	100	81488862	23	86	6.7
1	81597275	81597550	275	81597412	37	309	55.7
1	81617450	81617475	25	81617462	21	21	2.2
1	82195775	82195825	50	82195787	19	38	7.4
1	82323575	82323775	200	82323662	31	217	18.6
1	82353675	82353875	200	82353712	23	165	8.2
1	82435900	82435925	25	82435912	18	18	3
1	82699625	82699975	350	82699812	28	319	50.5
1	82720050	82720075	25	82720062	19	19	3.7
1	84096750	84097100	350	84096937	97	876	80.9
1	84284525	84284850	325	84284712	28	296	31.2
1	84297700	84297725	25	84297712	18	18	1.5
1	84428750	84428875	125	84428762	57	246	46
1	84717850	84717875	25	84717862	18	18	2.2
1	87624600	87624750	150	87624662	22	118	9.6
1	87639000	87639025	25	87639012	19	19	3.7
1	87684800	87684850	50	87684812	18	36	4.5
1	88019000	88019250	250	88019162	52	398	53.4
1	88032600	88032825	225	88032662	58	421	34.9
1	88139800	88139875	75	88139812	30	85	14.8
1	88142150	88142550	400	88142287	87	973	158.1
1	88175125	88175200	75	88175162	19	56	6.7
1	88180100	88180175	75	88180112	32	94	18.6
1	88265625	88265750	125	88265737	58	260	45.3
1	88318600	88319100	500	88318737	113	1196	179.6
1	88335175	88335275	100	88335212	29	103	17.1
1	88356425	88356550	125	88356512	35	166	29.7
1	88357625	88358025	400	88357762	123	1165	100.2
1	88358975	88359125	150	88359062	36	205	38.6
1	88363450	88363525	75	88363462	23	65	10.4
1	88381500	88381600	100	88381537	36	138	20.8
1	88749200	88749500	300	88749337	35	324	20
1	89057550	89057950	400	89057712	70	784	95.7
1	89094325	89094425	100	89094387	23	83	10.4
1	89560375	89560550	175	89560437	23	143	20
1	90336450	90336475	25	90336462	18	18	1.5
1	90496075	90496125	50	90496112	20	39	7.4
1	90499575	90499625	50	90499587	22	43	7.4
1	90583400	90583550	150	90583537	26	135	22.3
1	90592025	90592050	25	90592037	19	19	3.7
1	90605500	90605650	150	90605537	28	158	26
1	90638025	90638250	225	90638112	30	214	24.5
1	90639050	90639225	175	90639137	32	199	36.4
1	90645275	90645300	25	90645287	19	19	3.7
1	90755525	90755575	50	90755562	48	91	17.1
1	90904000	90904050	50	90904012	19	38	6.7
1	90943550	90943650	100	90943562	25	89	17.1
1	91263775	91263800	25	91263787	18	18	3
1	91372550	91372575	25	91372562	20	20	3.7
1	91411475	91411675	200	91411637	21	153	28.2
1	91655225	91655250	25	91655237	21	21	3
1	91691500	91691600	100	91691537	28	104	17.1
1	91701800	91701950	150	91701912	59	302	46
1	91753850	91754150	300	91753937	38	376	54.9
1	91766050	91766225	175	91766137	35	202	20
1	91767150	91767275	125	91767212	36	165	26
1	91855550	91855750	200	91855587	34	214	28.2
1	91945950	91946050	100	91946012	20	76	4.5
1	92236500	92236525	25	92236512	19	19	3
1	92375275	92375300	25	92375287	19	19	3.7
1	92395650	92395775	125	92395712	21	99	17.8
1	92459050	92459200	150	92459137	25	129	10.4
1	92869200	92869250	50	92869212	21	41	7.4
1	93228750	93228775	25	93228762	20	20	3
1	93371225	93371250	25	93371237	19	19	3
1	93378175	93378200	25	93378187	39	39	7.4
1	93900825	93900925	100	93900837	25	91	10.4
1	93949900	93949925	25	93949912	18	18	3
1	94054750	94054800	50	94054762	18	36	4.5
1	94262725	94262750	25	94262737	26	26	4.5
1	94350600	94350750	150	94350662	22	118	11.9
1	94661450	94661500	50	94661487	20	39	5.9
1	95342250	95342275	25	95342262	19	19	3.7
1	95465900	95466075	175	95466037	25	143	20.8
1	96128900	96129100	200	96128962	31	207	26
1	96823950	96824025	75	96823987	19	55	5.2
1	96860950	96861325	375	96861162	113	1036	52.7
1	96864600	96864625	25	96864612	21	21	0
1	97432175	97432200	25	97432187	18	18	2.2
1	97432450	97432775	325	97432612	72	672	69
1	98313250	98313625	375	98313437	42	474	34.9
1	98705050	98705325	275	98705212	46	390	36.4
1	99453200	99453375	175	99453362	28	165	31.9
1	99600075	99600100	25	99600087	20	20	3.7
1	99693900	99693925	25	99693912	18	18	2.2
1	99914300	99914325	25	99914312	18	18	2.2
1	99916925	99917150	225	99916987	39	306	38.6
1	99931525	99931550	25	99931537	18	18	2.2
1	101540675	101540900	225	101540762	37	277	17.1
1	101801050	101801250	200	101801187	27	179	21.5
1	102246875	102247125	250	102246962	52	414	23.7
1	102708250	102708500	250	102708362	45	363	35.6
1	103456150	103456275	125	103456187	29	132	19.3
1	103584650	103585025	375	103584887	48	499	22.3
1	103746425	103746700	275	103746512	22	212	11.1
1	104008550	104008675	125	104008662	20	93	15.6
1	104101900	104102025	125	104101937	20	96	5.2
1	104921500	104921800	300	104921662	44	370	43
1	105299175	105299225	50	105299212	21	39	1.5
1	105300075	105300400	325	105300262	24	251	16.3
1	106815100	106815350	250	106815262	49	394	38.6
1	106840175	106840650	475	106840362	53	649	86.8
1	106899025	106899100	75	106899037	20	60	2.2
1	106899425	106899450	25	106899437	18	18	1.5
1	106922575	106923050	475	106922712	38	471	64.6
1	107183225	107183250	25	107183237	18	18	2.2
1	107319075	107319100	25	107319087	20	20	3.7
1	107817575	107817650	75	107817637	20	57	9.6
1	107886150	107886175	25	107886162	18	18	3
1	108004450	108004550	100	108004462	24	89	11.1
1	108049350	108050275	925	108049662	68	1232	119.5
1	108060650	108060725	75	108060712	22	63	8.9
1	108100525	108100550	25	108100537	19	19	3.7
1	108392250	108392350	100	108392262	20	75	10.4
1	108541550	108541750	200	108541637	24	169	17.1
1	108549600	108549775	175	108549737	50	262	38.6
1	108587475	108587500	25	108587487	32	32	5.9
1	108777050	108777075	25	108777062	18	18	3
1	109806000	109806250	250	109806137	55	439	24.5
1	110376275	110376525	250	110376337	53	414	40.1
1	112275150	112275400	250	112275362	20	184	20.8
1	112618325	112618375	50	112618337	18	36	5.9
1	113474475	113474500	25	113474487	20	20	3.7
1	113526925	113527150	225	113526937	36	268	34.9
1	113870675	113870725	50	113870687	19	38	6.7
1	114207600	114207725	125	114207687	22	101	17.8
1	114782325	114782450	125	114782412	23	106	16.3
1	115786900	115786925	25	115786912	18	18	3
1	115798225	115798475	250	115798387	42	330	24.5
1	116469700	116469725	25	116469712	18	18	3
1	116677250	116677475	225	116677337	27	203	22.3
1	117857325	117857450	125	117857387	23	106	8.2
1	119118375	119118550	175	119118462	25	150	7.4
1	120056225	120056475	250	120056337	36	286	28.9
1	120148850	120148950	100	120148937	20	70	13.4
1	120152725	120152750	25	120152737	18	18	1.5
1	120216725	120216825	100	120216737	26	99	14.1
1	120453050	120453175	125	120453087	33	161	31.9
1	120470300	120470375	75	120470362	28	78	13.4
1	120557725	120557875	150	120557812	23	124	11.9
1	120738800	120738975	175	120738862	39	225	28.2
1	120831450	120831575	125	120831562	32	137	20.8
1	120875550	120875775	225	120875637	24	192	31.9
1	120876575	120877025	450	120876762	78	939	78.7
1	120877550	120877675	125	120877637	48	230	42.3
1	120880100	120880125	25	120880112	19	19	3
1	120903375	120903925	550	120903737	53	747	77.2
1	120911275	120911300	25	120911287	19	19	3.7
1	121132975	121133375	400	121133262	54	587	104.6
1	121175350	121175475	125	121175462	37	158	17.8
1	121176125	121176250	125	121176187	27	131	22.3
1	121325375	121325450	75	121325387	31	85	14.1
1	121462475	121462675	200	121462512	30	209	20.8
1	121528050	121528075	25	121528062	19	19	1.5
1	121692075	121692100	25	121692087	19	19	3
1	121696400	121696475	75	121696437	24	64	8.2
1	121696750	121696775	25	121696762	18	18	3
1	121782325	121782400	75	121782387	21	62	11.9
1	122032450	122032500	50	122032487	19	37	5.9
1	122182100	122182125	25	122182112	19	19	3
1	122471525	122471700	175	122471612	33	200	28.9
1	122915425	122915500	75	122915487	23	65	12.6
1	123247550	123247575	25	123247562	18	18	1.5
1	123300225	123300350	125	123300287	23	108	10.4
1	123395400	123395600	200	123395512	26	182	20
1	123670175	123670550	375	123670412	71	755	63.1
1	124434825	124435175	350	124435012	54	517	37.8
1	126002450	126002550	100	126002487	21	78	4.5
1	127263050	127263625	575	127263437	25	469	75.7
1	127388725	127388775	50	127388762	19	37	6.7
1	127572400	127572550	150	127572437	20	111	11.9
1	127682250	127682325	75	127682312	22	61	6.7
1	127956700	127957100	400	127956812	56	590	53.4
1	128205300	128205500	200	128205362	26	192	27.5
1	128582350	128582375	25	128582362	18	18	2.2
1	128689350	128689550	200	128689462	27	183	20.8
1	129089325	129089375	50	129089337	19	37	4.5
1	129090000	129090025	25	129090012	24	24	4.5
1	129284300	129284325	25	129284312	18	18	3
1	129324400	129324475	75	129324412	19	57	7.4
1	129630700	129630725	25	129630712	18	18	1.5
1	129732375	129732625	250	129732512	68	524	50.5
1	129760075	129760150	75	129760087	18	53	8.9
1	130073150	130073225	75	130073162	24	68	12.6
1	130171900	130172000	100	130171937	20	78	13.4
1	130219900	130220175	275	130220037	57	452	34.1
1	130227800	130227850	50	130227837	20	38	5.9
1	130413075	130413400	325	130413262	26	285	25.2
1	130413625	130414050	425	130413837	48	626	61.6
1	130687750	130687875	125	130687787	36	167	28.9
1	132105700	132105775	75	132105762	21	62	11.9
1	132199650	132199675	25	132199662	24	24	4.5
1	132290025	132290050	25	132290037	19	19	3.7
1	132554675	132554825	150	132554787	20	111	16.3
1	132848425	132848650	225	132848537	55	410	41.6
1	133255025	133255075	50	133255037	25	49	8.9
1	133255300	133255375	75	133255337	23	65	8.9
1	133306425	133306550	125	133306437	35	168	21.5
1	133574950	133575200	250	133575062	35	274	41.6
1	133622375	133622450	75	133622387	19	57	5.9
1	133713575	133713600	25	133713587	19	19	3
1	133717800	133718075	275	133717962	45	437	62.3
1	133737300	133737425	125	133737312	24	113	20.8
1	133738175	133738275	100	133738187	27	93	14.8
1	133798550	133798625	75	133798587	29	84	11.1
1	134028600	134028825	225	134028662	78	502	55.7
1	134109025	134109050	25	134109037	18	18	3
1	134158900	134159025	125	134158912	19	91	14.8
1	134298600	134298900	300	134298737	79	672	53.4
1	134304575	134304650	75	134304637	44	127	23
1	134348425	134348500	75	134348462	20	58	8.9
1	134642825	134642850	25	134642837	18	18	1.5
1	134678425	134678575	150	134678537	41	211	20.8
1	134775575	134775600	25	134775587	18	18	3
1	134846625	134847075	450	134846987	35	462	60.9
1	134907850	134908150	300	134907937	46	449	68.3
1	135036625	135036800	175	135036762	43	229	42.3
1	135225125	135225625	500	135225287	212	2444	138
1	135320125	135320275	150	135320262	59	306	38.6
1	135320575	135320600	25	135320587	29	29	5.2
1	135320950	135321125	175	135321062	75	451	64.6
1	135437625	135437650	25	135437637	19	19	3.7
1	135495275	135495600	325	135495362	58	561	80.9
1	135510750	135511075	325	135510937	76	771	98
1	135512300	135512475	175	135512462	45	223	31.2
1	135790250	135790600	350	135790412	67	622	37.8
1	135879050	135879250	200	135879187	40	264	46
1	136026950	136027025	75	136026962	20	56	8.2
1	136271925	136272000	75	136271937	19	56	10.4
1	136308875	136308900	25	136308887	19	19	3.7
1	136351450	136351775	325	136351612	108	963	92.8
1	136377300	136377325	25	136377312	18	18	1.5
1	136387025	136387350	325	136387187	66	621	46
1	136427750	136427825	75	136427762	18	51	8.2
1	136591625	136591725	100	136591637	25	91	13.4
1	137002625	137002725	100	137002637	21	76	10.4
1	137015600	137015775	175	137015612	75	463	84.6
1	137034075	137034325	250	137034262	47	387	45.3
1	137324225	137324575	350	137324337	62	634	60.9
1	137370125	137370250	125	137370237	23	97	10.4
1	137606200	137606300	100	137606212	22	83	14.8
1	137948100	137948125	25	137948112	20	20	3.7
1	138273900	138273925	25	138273912	18	18	1.5
1	138386775	138387000	225	138386862	60	423	72
1	138429600	138429925	325	138429712	62	620	97.2
1	138491350	138491375	25	138491362	49	49	8.9
1	138498625	138498675	50	138498637	18	36	5.9
1	138549325	138549350	25	138549337	20	20	3
1	138554525	138554725	200	138554587	56	362	56.4
1	138598850	138598875	25	138598862	46	46	8.9
1	138765875	138766075	200	138765962	32	228	28.9
1	138769400	138769500	100	138769437	25	89	12.6
1	138770150	138770425	275	138770262	47	423	54.2
1	138868075	138868275	200	138868237	29	188	27.5
1	138990400	138990625	225	138990537	47	338	42.3
1	139034825	139034975	150	139034912	23	127	19.3
1	139139750	139139800	50	139139762	23	46	8.9
1	139195000	139195250	250	139195112	67	525	51.2
1	139204100	139204250	150	139204162	26	138	17.1
1	139234775	139235125	350	139234937	74	693	58.6
1	139414075	139414200	125	139414162	24	104	15.6
1	139456225	139456475	250	139456287	20	173	16.3
1	139473500	139473900	400	139473712	65	686	57.9
1	139970600	139970650	50	139970612	20	39	7.4
1	140083375	140083625	250	140083512	39	318	22.3
1	140388050	140388225	175	140388112	34	218	37.8
1	140388675	140388725	50	140388687	19	37	6.7
1	140421100	140421200	100	140421112	21	79	14.8
1	140647100	140647175	75	140647112	19	57	11.1
1	140655625	140655725	100	140655662	23	80	14.8
1	140773000	140773150	150	140773062	27	150	20.8
1	140773600	140773650	50	140773637	35	69	12.6
1	140856125	140856150	25	140856137	27	27	5.2
1	141010850	141010900	50	141010887	20	39	6.7
1	141228800	141229125	325	141228937	51	461	17.8
1	141229425	141229550	125	141229437	24	111	16.3
1	141238600	141238675	75	141238612	24	67	9.6
1	141242250	141242425	175	141242337	45	275	34.1
1	141271225	141271250	25	141271237	28	28	5.2
1	141311075	141311325	250	141311162	52	439	49.7
1	142245750	142246075	325	142245862	63	598	54.9
1	142329975	142330175	200	142330037	37	239	25.2
1	142729425	142729450	25	142729437	18	18	2.2
1	143124700	143124725	25	143124712	18	18	3
1	143125025	143125050	25	143125037	18	18	1.5
1	144877375	144877400	25	144877387	19	19	2.2
1	144890175	144890300	125	144890237	23	103	11.1
1	144961900	144962500	600	144962062	60	838	87.6
1	145033775	145034150	375	145034037	26	328	51.9
1	145127925	145128075	150	145128012	27	139	23.7
1	145182825	145182850	25	145182837	18	18	2.2
1	145367875	145367925	50	145367887	19	37	1.5
1	145539550	145539650	100	145539562	25	89	12.6
1	145766675	145766725	50	145766687	28	55	10.4
1	148085125	148085300	175	148085237	27	154	14.1
1	148119475	148119550	75	148119487	19	57	4.5
1	148247800	148247925	125	148247862	20	93	9.6
1	149068550	149068575	25	149068562	20	20	0.7
1	150243675	150243775	100	150243762	24	87	3
1	150615950	150616225	275	150616062	34	284	32.7
1	150837150	150837175	25	150837162	18	18	3
1	151719400	151719425	25	151719412	19	19	3
1	152155725	152155750	25	152155737	20	20	3.7
1	152848700	152848775	75	152848737	21	59	8.9
1	152939750	152939900	150	152939862	27	142	22.3
1	152982425	152982500	75	152982487	23	62	10.4
1	152999250	152999300	50	152999287	20	39	7.4
1	153228100	153228150	50	153228137	20	39	6.7
1	153233525	153233650	125	153233562	20	96	13.4
1	153341975	153342100	125	153342062	21	98	17.8
1	153476025	153476250	225	153476137	39	261	19.3
1	153640650	153641025	375	153640762	70	718	66.8
1	153739925	153740075	150	153740012	24	133	17.1
1	153832825	153832950	125	153832887	26	109	12.6
1	154019725	154019750	25	154019737	18	18	3
1	154335525	154335675	150	154335637	28	152	27.5
1	154530025	154530100	75	154530037	19	56	8.2
1	154555575	154555900	325	154555887	20	220	40.1
1	154579675	154579725	50	154579687	19	37	4.5
1	154634575	154634600	25	154634587	18	18	3
1	154665275	154665375	100	154665287	46	173	33.4
1	154678000	154678250	250	154678087	39	306	56.4
1	154705300	154705500	200	154705387	29	196	20.8
1	154717500	154717525	25	154717512	18	18	3
1	154735975	154736000	25	154735987	19	19	3.7
1	154736250	154736650	400	154736262	35	405	54.9
1	154787175	154787200	25	154787187	19	19	3.7
1	154799925	154800175	250	154800062	43	319	29.7
1	154855450	154855675	225	154855562	81	589	51.2
1	154871500	154871525	25	154871512	21	21	3.7
1	154978775	154978875	100	154978862	34	116	17.8
1	155031500	155031600	100	155031562	29	101	18.6
1	155078675	155078775	100	155078762	29	111	18.6
1	155082875	155083025	150	155082962	25	129	22.3
1	155138575	155139075	500	155138862	67	914	106.9
1	155243975	155244000	25	155243987	18	18	3
1	155415425	155415450	25	155415437	19	19	3.7
1	155440075	155440200	125	155440087	23	105	17.8
1	155799125	155799150	25	155799137	20	20	3
1	155842875	155843300	425	155842987	35	442	75
1	156848725	156848850	125	156848762	23	104	16.3
1	156861625	156861825	200	156861712	29	191	28.9
1	157734875	157734900	25	157734887	24	24	4.5
1	158401975	158402000	25	158401987	19	19	3
1	158439350	158439500	150	158439412	30	160	25.2
1	158775300	158775400	100	158775337	26	102	12.6
1	158816475	158816625	150	158816587	29	162	18.6
1	158820200	158820425	225	158820337	40	298	42.3
1	158831450	158831700	250	158831562	41	347	31.2
1	158885075	158885225	150	158885187	24	128	21.5
1	158938400	158938425	25	158938412	19	19	3.7
1	159111050	159111075	25	159111062	19	19	3
1	159121875	159122025	150	159122012	21	112	20.8
1	159295725	159295875	150	159295812	35	181	24.5
1	159567950	159568100	150	159568062	23	131	18.6
1	159774725	159774775	50	159774737	19	37	3
1	159777125	159777150	25	159777137	19	19	3.7
1	159820100	159820175	75	159820112	29	83	15.6
1	159868300	159868350	50	159868337	21	40	5.9
1	160192950	160193025	75	160192962	25	72	10.4
1	160198650	160198900	250	160198812	61	454	49.7
1	161068600	161068700	100	161068612	36	133	23.7
1	161250000	161250200	200	161250012	30	185	20
1	161266650	161266775	125	161266712	22	103	9.6
1	161702600	161702800	200	161702687	24	175	26
1	161821750	161821825	75	161821762	21	57	0
1	161952150	161952200	50	161952162	19	38	5.9
1	162046575	162046700	125	162046687	37	159	24.5
1	162049775	162049925	150	162049787	52	232	37.8
1	162055025	162055050	25	162055037	20	20	3.7
1	162488575	162488950	375	162488862	27	287	32.7
1	162571625	162571650	25	162571637	39	39	7.4
1	162628925	162628950	25	162628937	20	20	3.7
1	162876350	162876500	150	162876487	33	157	26.7
1	162979575	162979700	125	162979587	25	105	20
1	163084275	163084750	475	163084462	78	799	66
1	163085625	163085650	25	163085637	34	34	6.7
[truncated: 11,581 more rows]

## Sheet: BRN2 Day2 Diff. TetO-Brn2
CHROM	START	END	LENGTH	PEAK POS	PEAK HEIGHT	TOTAL TARGET COUNTS	TOTAL BACKGROUND COUNTS
[truncated: 8,401 more rows]

[truncated: 6 more sheets: SOX2 Day2 Diff. rtta, BRN2 Day2 Diff. rtta, H3K27Ac Day2 Diff. TetO-Brn2, H3K27Ac Day2 Diff. rtta, H3K4me1 Day2 Diff. TetO-Brn2, H3K4me1 Day2 Diff. rtta]
