# Supplementary material for: SOX2 Co-Occupies Distal Enhancer Elements with Distinct POU Factors in ESCs and NPCs to Specify Cell State
Source: PLoS Genet. 2013 Feb 21;9(2):e1003288. doi: 10.1371/journal.pgen.1003288 (PMC3578749; doi:10.1371/journal.pgen.1003288)
Supplement: Table S2 — Bound Promoters and Enhancers for ChIP-Seq Experiments. Bound promoters, active enhancers, and poised enhancers for SOX2 and OCT4 in ESCs, and SOX2 and BRN2 in NPCs. (XLSX) [file pgen.1003288.s007.xlsx]

## Sheet: Key
Table S2
Bound promoters, active enhancers, and poised enhancers for Sox2 in ESCs, Sox2 in NPCs, Brn2 in NPCs.
Column	Description
CHROM	Chromosome
START	Start of Genomic Feature
STOP	End of Genomic Feature
STRAND	Strand
ID1	Feature Identifier 1
ID2	Feature Identifier 2
DISTANCE	Distance Between Bound Region and Feature*
REGION START	Start of Bound Region
REGION END	End of Bound Region
PEAK POS	Position of Peak within Bound Region
PEAK HEIGHT	Height of Peak in Reads
TOTAL TARGET COUNTS	Number of Reads within Bound Region in Experimental ChIP-Seq
TOTAL BACKGROUND COUNTS	Number of Reads within Bound Region in Background Dataset (WCE or H3-ChIP-Seq)
* Note that regions were assigned to promoters if they were within 1kb of the TSS, and regions were assigned to enhancers if they were within an enhancer regions as defined by H3K4me1 and H3K27Ac enrichment, thus all enhancer-associated regions are 0 bp away from the associated enhancer.

## Sheet: Sox2 ESC TSS
CHROM	START	STOP	STRAND	ID1	ID2	DISTANCE	REGION START	REGION END	PEAK POS	PEAK HEIGHT	TOTAL TARGET COUNTS	TOTAL BACKGROUND COUNTS
1	6720131	6851021	1	NM_173868	St18	-631	6719475	6719500	6719487	13	13	1.1
1	11399325	11961115	1	NM_177173	A830018L16Rik	25	11399350	11399450	11399362	13	51	8.5
1	12976349	12851762	-1	NM_172841	Slco5a1	0	12976250	12976550	12976362	32	303	32.4
1	13112377	13098641	-1	NM_001081209	Prdm14	-973	13113350	13113475	13113362	16	74	10.9
1	13645723	13611114	-1	NM_145381	Lactb2	-177	13645900	13646075	13646012	18	111	17.2
1	20805364	20788165	-1	NM_008563	Mcm3	-11	20805375	20805400	20805387	13	13	2.4
1	37834957	37823435	-1	NM_026913	Mitd1	0	37834925	37835025	37835012	25	91	16.9
1	37835098	37842879	1	NM_027098	Mrpl30	-73	37834925	37835025	37835012	25	91	16.9
1	39845458	39970856	1	NM_008696	Map4k4	-133	39845200	39845325	39845237	16	73	3.9
1	46798055	46752089	-1	NM_172653	Slc39a10	-95	46798150	46798400	46798287	24	191	24.3
1	51952788	52051729	1	NM_011487	Stat4	937	51953725	51953975	51953812	37	268	26.5
1	52063982	52106407	1	NM_009283	Stat1	-107	52063825	52063875	52063837	13	26	4.6
1	52177777	52107994	-1	NM_001081081	Gls	-198	52177975	52178175	52178012	23	164	25.8
1	52177777	52129825	-1	NM_001113383	Gls	-198	52177975	52178175	52178012	23	164	25.8
1	52897385	52869671	-1	NM_144953	1700019D03Rik	-290	52897675	52898425	52898212	110	1303	116.3
1	54195227	54313272	1	NM_030025	4930511H11Rik	-2	54194950	54195225	54195137	33	295	42.9
1	55032390	55022379	-1	NM_010477	Hspd1	-160	55032550	55032575	55032562	13	13	2.2
1	55032861	55035851	1	NM_008303	Hspe1	-286	55032550	55032575	55032562	13	13	2.2
1	55075789	55099444	1	NM_025283	Prei3	-264	55075375	55075525	55075412	21	121	21.4
1	55171327	55114706	-1	NM_028713	3222401M22Rik	577	55170525	55170750	55170637	28	194	21.4
1	57940611	57970443	1	NM_199007	Sgol2	-261	57940175	57940350	57940237	21	135	20.7
1	58368634	58356546	-1	NM_001042634	Clk1	-516	58369150	58369300	58369237	19	103	4.9
1	58368634	58356546	-1	NM_009905	Clk1	-516	58369150	58369300	58369237	19	103	4.9
1	58918116	58939664	1	NM_172656	Als2cr2	-191	58917900	58917925	58917912	13	13	2.5
1	59426692	59431501	1	NM_008057	Fzd7	-67	59426475	59426625	59426537	24	136	23
1	64055665	63969951	-1	NM_033563	Klf7	-735	64056400	64056700	64056562	29	267	35.1
1	65113418	65092891	-1	NM_010497	Idh1	18	65113350	65113400	65113362	17	34	6.3
1	66634100	66653013	1	NM_025683	Rpe	-725	66633175	66633375	66633337	26	174	7.5
1	72240628	72328161	1	NM_009533	Xrcc5	0	72240550	72240675	72240587	41	178	31.3
1	72516477	72566337	1	NM_018817	Smarcal1	0	72516300	72516500	72516412	50	337	43.9
1	74439427	74464049	1	NM_021383	Rqcd1	448	74439875	74439900	74439887	14	14	1.8
1	79319114	79313693	-1	NM_009129	Scg2	89	79319000	79319025	79319012	14	14	2.8
1	84718329	84600214	-1	NM_133975	Trip12	-71	84718400	84718575	84718462	21	134	12.3
1	84718879	84779509	1	NM_025386	Fbxo36	-304	84718400	84718575	84718462	21	134	12.3
1	88134638	88138474	1	NM_145222	B3gnt7	-38	88134525	88134600	88134537	14	41	7.7
1	88190626	88175889	-1	NM_010880	Ncl	-24	88190650	88190775	88190662	17	75	12.6
1	88357906	88361869	1	NM_008972	Ptma	0	88357575	88357925	88357762	79	698	52.9
1	93243628	93241888	-1	NM_019479	Hes6	0	93243550	93243775	93243662	29	214	27
1	93289734	93246387	-1	NM_011066	Per2	-91	93289825	93290000	93289887	17	110	9.2
1	108587198	108552450	-1	NM_027534	Fvt1	-177	108587375	108587500	108587462	19	84	14.2
1	121740714	121735449	-1	NM_175106	2300008B03Rik	0	121740675	121740850	121740712	16	103	14.7
1	129601709	129632383	1	NM_028399	Ccnt2	-134	129601500	129601575	129601512	17	49	8.9
1	132965780	132955987	-1	NM_145508	Dyrk3	-895	132966675	132966750	132966737	18	48	8.7
1	136202350	136207392	1	NM_173771	4933406M09Rik	-50	136202175	136202300	136202262	18	76	10.6
1	136231877	136248752	1	NM_028320	Adipor1	-577	136231275	136231300	136231287	13	13	2.5
1	138231681	138256562	1	NM_026500	Ddx59	494	138232175	138232200	138232187	14	14	2.2
1	138231727	138234203	1	NM_178052	Ddx59	448	138232175	138232200	138232187	14	14	2.2
1	141999822	141902265	-1	NM_009888	Cfh	-203	142000025	142000100	142000037	13	38	4.2
1	142062667	142426672	1	NM_001081027	Kcnt2	-617	142062000	142062050	142062037	26	50	9.9
1	155502591	155507684	1	NM_011267	Rgs16	459	155503050	155503300	155503187	34	277	39.1
1	159295258	159325410	1	NM_001033284	BC026585	442	159295700	159295925	159295787	33	236	31.3
1	160193003	160081947	-1	NM_207583	6430517E21Rik	0	160192925	160193075	160193012	21	111	17.7
1	160199016	160528463	1	NM_007495	Astn1	-141	160198675	160198875	160198812	22	137	17.7
1	162907309	162877289	-1	NM_172644	Dars2	-16	162907325	162907550	162907437	51	385	52.2
1	162907617	162923003	1	NM_027429	Cenpl	-67	162907325	162907550	162907437	51	385	52.2
1	167839309	167712149	-1	NM_011137	Pou2f1	-491	167839800	167840000	167839887	20	146	13.4
1	167839309	167712149	-1	NM_198932	Pou2f1	-491	167839800	167840000	167839887	20	146	13.4
1	169435058	169476298	1	NM_009107	Rxrg	867	169435925	169436000	169435937	15	44	8.4
1	171805880	171786211	-1	NM_010476	Hsd17b7	-120	171806000	171806050	171806037	21	40	7.5
1	172011621	171978677	-1	NM_133806	Uap1	-429	172012050	172012075	172012062	16	16	3.1
1	173059189	173054477	-1	NM_001037170	Tomm40l	739	173058275	173058450	173058387	41	243	41.9
1	173166185	173178290	1	NM_011615	Dedd	915	173167100	173167225	173167162	21	98	14.2
1	173340152	173341425	1	NM_019484	Refbp2	-227	173339400	173339925	173339737	31	481	35.6
1	173863943	173841046	-1	NM_033509	Vangl2	0	173863925	173864175	173864112	22	177	18.6
1	174318991	174335553	1	NM_033608	Igsf9	-91	174318775	174318900	174318787	14	65	10.1
1	178651486	178857107	1	NM_029756	Sdccag8	-461	178650775	178651025	178650912	38	285	33.8
1	180174459	180164974	-1	NM_016805	Hnrnpu	-291	180174750	180175075	180174937	79	747	77.6
1	180242555	180319922	1	NM_026626	Efcab2	895	180243450	180243700	180243662	27	237	29.7
1	182771713	182775076	1	NM_010094	Lefty1	-988	182770375	182770725	182770537	118	996	54.3
1	183577710	183606349	1	NM_172846	A230079K17Rik	-510	183577075	183577200	183577112	14	64	12
1	185735716	185776892	1	NM_022019	Dusp10	-266	185735350	185735450	185735387	17	63	10.5
1	191871468	191822565	-1	NM_008937	Prox1	968	191870400	191870500	191870437	14	54	9.5
1	192679814	192648364	-1	NM_144879	B130052G07Rik	-36	192679850	192679950	192679912	18	66	9.4
3	7349676	7428436	1	NM_008862	Pkia	124	7349800	7350125	7349962	39	341	40.6
3	8492599	8544677	1	NM_025285	Stmn2	751	8493350	8493550	8493387	16	117	12.8
3	8947127	8912508	-1	NM_001025261	Tpd52	-123	8947250	8947500	8947412	28	216	17.7
3	8947127	8912508	-1	NM_001025262	Tpd52	-123	8947250	8947500	8947412	28	216	17.7
3	8987588	8912508	-1	NM_001025263	Tpd52	638	8986900	8986950	8986912	22	44	8.4
3	8987588	8912508	-1	NM_001025264	Tpd52	638	8986900	8986950	8986912	22	44	8.4
3	8987588	8912508	-1	NM_009412	Tpd52	638	8986900	8986950	8986912	22	44	8.4
3	9593158	9410082	-1	NM_133218	Zfp704	-692	9593850	9593900	9593887	16	30	5.7
3	14840281	14849111	1	NM_007606	Car3	-6	14840075	14840275	14840262	20	136	21.4
3	19380394	19412956	1	NM_026182	Mtfr1	706	19381100	19381325	19381187	25	193	26.4
3	30838656	30815106	-1	NM_027941	Lrrc34	706	30837525	30837950	30837687	42	493	65.1
3	34841553	34844009	1	NM_011443	Sox2	0	34841450	34841700	34841562	22	166	30.7
3	51312375	51339583	1	NM_009834	Ccrn4l	-575	51311550	51311800	51311612	35	282	41.8
3	57739613	57732277	-1	NM_175095	Commd2	-37	57739650	57739725	57739712	17	48	9.4
3	67518052	67562996	1	NM_138591	Gfm1	-102	67517875	67517950	67517887	15	42	8
3	67670696	67692160	1	NM_025813	Mfsd1	-71	67670600	67670625	67670612	13	13	2.5
3	82082848	82107160	1	NM_021370	Accn5	-673	82082000	82082175	82082112	19	108	6.1
3	83852247	83860242	1	NM_009144	Sfrp2	0	83852100	83852300	83852187	25	161	22.5
3	84752118	84790502	1	NM_177260	9930117H01Rik	-493	84751350	84751625	84751437	32	252	39.2
3	85660055	85740397	1	NM_144896	Pet112l	0	85659875	85660075	85659937	28	176	25.1
3	87971507	87944841	-1	NM_033573	Prcc	-18	87971525	87971625	87971612	48	173	32
3	87992292	88002053	1	NM_008231	Hdgf	-67	87992025	87992225	87992087	18	124	21.4
3	90329439	90323426	-1	NM_030080	Creb3l4	-36	90329475	90329575	90329512	32	123	19.6
3	93640520	93650047	1	NM_009112	S100a10	905	93641425	93641450	93641437	13	13	2.4
3	94564234	94577597	1	NM_172434	Tnrc4	-634	94563300	94563600	94563462	39	344	43.3
3	95519793	95582643	1	NM_001037737	Arnt	-168	95519350	95519625	95519537	21	189	33.4
3	95519793	95582643	1	NM_009709	Arnt	-168	95519350	95519625	95519537	21	189	33.4
3	95674362	95704645	1	NM_146133	Golph3l	-62	95674225	95674300	95674237	31	91	17.3
3	96189931	96246533	1	NM_001025613	Za20d1	-456	96189225	96189475	96189362	34	263	28.5
3	96189931	96246533	1	NM_001025614	Za20d1	-456	96189225	96189475	96189362	34	263	28.5
3	97244195	97261973	1	NM_019800	Acp6	630	97244825	97245200	97245012	148	1308	58.1
3	103256616	103298792	1	NM_177857	Dennd2c	-16	103256200	103256600	103256387	95	968	75
3	103300771	103308213	1	NM_026602	Bcas2	0	103300725	103300775	103300737	18	34	5.7
3	104043180	104095680	1	NM_172684	Rsbn1	170	104043350	104043650	104043462	29	277	48.7
3	105181202	105131800	-1	NM_030249	Cttnbp2nl	27	105181050	105181175	105181162	22	89	16.1
3	106675817	106630315	-1	NM_133869	Cept1	-33	106675850	106675900	106675862	13	26	4.7
3	106675882	106702901	1	NM_001025582	Tmem77	0	106675850	106675900	106675862	13	26	4.7
3	106675882	106702901	1	NM_026013	Tmem77	0	106675850	106675900	106675862	13	26	4.7
3	108059801	108054390	-1	NM_026672	Gstm7	0	108059800	108059900	108059887	18	63	11.2
3	108338990	108330310	-1	NM_175183	Atxn7l2	690	108338150	108338300	108338212	18	98	16.6
3	108354655	108340321	-1	NM_008596	Sypl2	-445	108355100	108355175	108355112	19	54	9.1
3	108850355	108806693	-1	NM_029522	Gpsm2	0	108850250	108850400	108850337	16	90	16.2
3	116851570	116895754	1	NM_001113478	Frrs1	755	116852325	116852550	116852437	17	133	22.6
3	126990474	126913628	-1	NM_178655	Ank2	0	126990425	126990525	126990512	28	102	17.5
3	134177031	134199474	1	NM_001004367	Cxxc4	-281	134176550	134176750	134176662	21	135	14.5
3	135376145	135404565	1	NM_025356	Ube2d3	-70	135376000	135376075	135376062	14	40	2.8
3	142333004	142180043	-1	NM_019808	Pdlim5	-146	142333150	142333275	142333237	21	91	13.4
3	142333004	142240608	-1	NM_019809	Pdlim5	-146	142333150	142333275	142333237	21	91	13.4
3	152147685	152121340	-1	NM_027287	Dnajb4	0	152147525	152147850	152147662	27	278	27
3	152147843	152174216	1	NM_057172	Fubp1	0	152147525	152147850	152147662	27	278	27
3	155028671	155020213	-1	NM_029330	Fpgt	146	155028475	155028525	155028487	13	26	4.7
3	155028726	155129571	1	NM_028938	Lrrc44	-201	155028475	155028525	155028487	13	26	4.7
3	157967047	157945785	-1	NM_001093753	Sfrs11	-353	157967400	157967575	157967487	21	132	19.3
2	11090234	11219079	1	NM_008859	Prkcq	-409	11089725	11089825	11089812	14	53	9.6
2	17973024	18130143	1	NM_010804	Mllt10	126	17973150	17973175	17973162	17	17	3.2
2	22747168	22767173	1	NM_019501	Pdss1	-143	22746950	22747025	22747012	21	60	12
2	25002766	25005339	1	NM_025980	Nrarp	0	25002500	25002875	25002687	159	1395	35.3
2	25194329	25200222	1	NM_001081085	2010317E24Rik	0	25194225	25194400	25194262	23	142	19.7
2	26325646	26280044	-1	NM_008714	Notch1	-279	26325925	26326300	26326137	85	812	61.9
2	26724822	26712780	-1	NM_009298	Surf6	-153	26724975	26725100	26724987	18	85	14.2
2	28288333	28284011	-1	NM_027040	1700007K13Rik	58	28288250	28288275	28288262	14	14	2.7
2	28947000	29004480	1	NM_198033	Setx	0	28946875	28947075	28946887	14	103	18.7
2	29884051	29893801	1	NM_023871	Set	0	29883875	29884100	29883937	26	198	24.2
2	31067931	31117478	1	NM_019681	Freq	319	31068250	31068450	31068337	19	121	15.1
2	31394825	31439528	1	NM_001033389	Fubp3	-675	31393975	31394150	31394037	39	249	38
2	31581953	31626236	1	NM_009594	Abl1	-53	31581850	31581900	31581862	14	28	4.6
2	32804065	32794997	-1	NM_019488	Slc2a8	-85	32804150	32804225	32804162	18	51	9.6
2	37252872	37248853	-1	NM_146253	Zbtb6	0	37252850	37252900	37252862	15	30	5.9
2	51894845	51944390	1	NM_175238	Rif1	-420	51894025	51894425	51894237	241	2244	73.5
2	52380576	52250328	-1	NM_146123	Cacnb4	826	52379700	52379750	52379712	13	26	3.8
2	65368331	65257956	-1	NM_018732	Scn3a	256	65367725	65368075	65367887	21	240	28.1
2	65646680	65824298	1	NM_153409	A330102K23Rik	-5	65646650	65646675	65646662	14	14	2.5
2	66241676	66071620	-1	NM_018733	Scn1a	326	66241075	66241350	66241162	28	261	37.1
2	68272820	68011285	-1	NM_016866	Stk39	-380	68273200	68273300	68273212	14	54	10.8
2	69662400	69672685	1	NM_001110145	Ssb	-100	69662275	69662300	69662287	14	14	2.7
2	69662400	69672685	1	NM_009278	Ssb	-100	69662275	69662300	69662287	14	14	2.7
2	71520255	71531804	1	NM_201366	Gm1631	-80	71519850	71520175	71520012	60	534	64.1
2	73712133	73709288	-1	NM_175015	Atp5g3	0	73712125	73712225	73712187	17	65	11
2	76473909	76463882	-1	NM_010222	Fkbp7	-41	76473950	76474025	76473962	19	51	8.7
2	79229827	79133329	-1	NM_001048176	Cerkl	-798	79230625	79230750	79230637	24	114	19.7
2	79257475	79253479	-1	NM_010894	Neurod1	-200	79257675	79257875	79257762	21	151	17.6
2	80439654	80459741	1	NM_027091	Nup35	271	80439925	80440275	80440087	27	307	40.5
2	84275013	84233698	-1	NM_011576	Tfpi	-37	84275050	84275150	84275062	14	55	9.6
2	84471547	84470061	-1	NM_001033166	2700094K13Rik	0	84471425	84471575	84471562	24	111	18
2	84471547	84470061	-1	NM_001037279	2700094K13Rik	0	84471425	84471575	84471562	24	111	18
2	84576268	84566198	-1	NM_009776	Serping1	343	84575775	84575925	84575787	18	103	13.5
2	84640246	84664425	1	NM_001081349	Slc43a1	-871	84639200	84639375	84639212	21	133	22.8
2	84838039	84847950	1	NM_182990	Ssrp1	111	84838150	84838275	84838212	20	90	14.4
2	90705560	90695474	-1	NM_026688	Ndufs3	0	90705550	90705575	90705562	16	16	3.1
2	90705624	90711399	1	NM_025991	Kbtbd4	-49	90705550	90705575	90705562	16	16	3.1
2	91003768	91012981	1	NM_007387	Acp2	-68	91003675	91003700	91003687	20	20	3.8
2	91732538	91730661	-1	NM_001012335	Mdk	-12	91732550	91732700	91732587	18	91	11.7
2	91732632	91730661	-1	NM_001012336	Mdk	0	91732550	91732700	91732587	18	91	11.7
2	91733121	91730661	-1	NM_010784	Mdk	-204	91733325	91733500	91733387	19	121	13.3
2	91985020	92165505	1	NM_138755	Phf21a	-795	91984175	91984225	91984187	13	26	2.5
2	93650615	93636292	-1	NM_183220	2610203E10Rik	340	93650175	93650275	93650187	18	67	12.6
2	93811569	93781473	-1	NM_026944	Alkbh3	-31	93811600	93811650	93811612	17	32	5.2
2	93958748	93833535	-1	NM_019657	Hsd17b12	0	93958650	93958750	93958687	20	76	14.8
2	101429825	101361619	-1	NM_026592	B230118H07Rik	-100	101429925	101430025	101429937	27	86	14.8
2	101479278	101501806	1	NM_009424	Traf6	797	101480075	101480100	101480087	15	15	2.8
2	103597917	103563783	-1	NM_001111289	Caprin1	-608	103598525	103598875	103598712	53	489	54.9
2	103597917	103563783	-1	NM_001111290	Caprin1	-608	103598525	103598875	103598712	53	489	54.9
2	103597917	103567945	-1	NM_001111292	Caprin1	-608	103598525	103598875	103598712	53	489	54.9
2	103598479	103563783	-1	NM_016739	Caprin1	-46	103598525	103598875	103598712	53	489	54.9
2	103598479	103567945	-1	NM_001111291	Caprin1	-46	103598525	103598875	103598712	53	489	54.9
2	106266967	106603011	1	NM_177110	C130023O10Rik	-67	106266650	106266900	106266787	27	212	17.9
2	109081576	109142583	1	NM_139303	Kif18a	599	109082175	109082425	109082287	37	288	28.8
2	113649500	113632332	-1	NM_181416	Arhgap11a	-300	113649800	113649825	113649812	22	22	3.9
2	116941179	116962980	1	NM_026620	2610510H03Rik	-29	116941125	116941150	116941137	17	17	3.4
2	117948395	117896328	-1	NM_027759	Fsip1	-5	117948400	117948425	117948412	15	15	2.8
2	118241119	118220198	-1	NM_138313	Bmf	19	118241075	118241100	118241087	15	15	2.9
2	118738559	118795562	1	NM_029617	Casc5	-384	118738150	118738175	118738162	21	21	3.9
2	120962827	120888169	-1	NM_013735	Trp53bp1	602	120961950	120962225	120962087	78	650	56.8
2	126244464	126279682	1	NM_011978	Slc27a2	-264	126243775	126244200	126243937	63	681	58.4
2	128509743	128545702	1	NM_028248	Tmem87b	-843	128508850	128508900	128508887	14	27	4.7
2	128658842	128710004	1	NM_178404	Zc3h6	-267	128658550	128658575	128658562	13	13	2.4
2	128890240	128903049	1	NM_015747	Slc20a1	-915	128889300	128889325	128889312	14	14	2.5
2	130388960	130375548	-1	NM_001081162	Slc4a11	-415	130389375	130389475	130389437	27	99	17
2	132572303	132559956	-1	NM_177303	B430119L13Rik	-222	132572525	132572725	132572662	36	221	33.8
2	136807772	136772898	-1	NM_013822	Jag1	-3	136807775	136808125	136807912	41	410	47.9
2	145913551	145916457	1	NM_016889	Insm1	-26	145913450	145913525	145913462	14	42	3.5
2	148566909	148563172	-1	NM_009976	Cst3	409	148566325	148566500	148566337	21	124	17.7
2	152539486	152586495	1	NM_028109	Tpx2	-236	152539125	152539250	152539237	32	142	26
2	152852741	152901904	1	NM_133847	Tm9sf4	-41	152852625	152852700	152852637	16	47	8.4
2	153037579	153095447	1	NM_001039939	Asxl1	821	153038400	153038600	153038462	33	228	39.7
2	154348466	154386224	1	NM_029362	Chmp4b	-66	154348300	154348400	154348312	19	71	12.1
2	155302652	155325748	1	NM_001085378	0610038P03Rik	-52	155302525	155302600	155302537	14	41	6.3
2	158356838	158454314	1	NM_153089	Ppp1r16b	762	158357600	158357725	158357637	15	72	11.6
2	160800497	160638419	-1	NM_173368	Chd6	-78	160800575	160800750	160800637	27	164	22.9
2	164513890	164518072	1	NM_028028	Zswim1	-765	164513100	164513125	164513112	21	21	4.2
2	165017684	164979236	-1	NM_080287	Elmo2	-291	165017975	165018100	165018037	15	70	13
2	165017684	164979236	-1	NM_207706	Elmo2	-291	165017975	165018100	165018037	15	70	13
2	165846861	165764293	-1	NM_028072	Sulf2	-514	165847375	165847525	165847462	21	110	14.5
2	166687483	166639346	-1	NM_001109905	Stau1	-42	166687525	166687575	166687537	17	32	5.4
2	166687483	166639346	-1	NM_001109906	Stau1	-42	166687525	166687575	166687537	17	32	5.4
2	166687483	166639346	-1	NM_011490	Stau1	-42	166687525	166687575	166687537	17	32	5.4
2	167898267	167872169	-1	NM_009628	Adnp	-8	167898275	167898700	167898412	21	277	55.2
2	168458406	168439537	-1	NM_175303	Sall4	0	168458300	168458500	168458412	46	326	49.6
2	168458406	168439537	-1	NM_201395	Sall4	0	168458300	168458500	168458412	46	326	49.6
2	168458406	168439537	-1	NM_201396	Sall4	0	168458300	168458500	168458412	46	326	49.6
2	172036819	172046954	1	NM_025912	2010011I20Rik	-219	172036550	172036600	172036562	15	28	4.7
2	173719989	173742710	1	NM_001102423	Stx16	-814	173719150	173719175	173719162	17	17	3.4
2	173719989	173742710	1	NM_001102424	Stx16	-814	173719150	173719175	173719162	17	17	3.4
2	173719989	173742710	1	NM_001102425	Stx16	-814	173719150	173719175	173719162	17	17	3.4
2	173719989	173742710	1	NM_172675	Stx16	-814	173719150	173719175	173719162	17	17	3.4
2	179906054	179841553	-1	NM_001081092	Taf4a	-971	179907025	179907175	179907087	25	138	18.7
2	180100995	180105691	1	NM_019822	Adrm1	-45	180100750	180100950	180100862	22	140	15.6
2	180639407	180597695	-1	NM_177852	Dido1	632	180638425	180638775	180638612	157	1416	86.2
2	181142578	181134969	-1	NM_011481	Srms	-272	181142850	181142925	181142862	15	43	7.7
5	3934191	4086210	1	NM_194462	Akap9	-441	3933725	3933750	3933737	14	14	2.7
5	19419684	20214746	1	NM_015823	Magi2	-409	19419200	19419275	19419212	15	45	6.1
5	29900028	30006864	1	NM_133907	Ube3c	-203	29899775	29899825	29899787	16	29	5.3
5	31165432	31173268	1	NM_174849	9430057O19Rik	-382	31165025	31165050	31165037	15	15	2.9
5	31165586	31183247	1	NM_001048192	9430057O19Rik	-536	31165025	31165050	31165037	15	15	2.9
5	31184369	31183098	-1	NM_024460	2310016E02Rik	-6	31184375	31184450	31184387	14	41	7.1
5	31478814	31475562	-1	NM_175311	Zfp513	-161	31478975	31479000	31478987	14	14	2.4
5	31729070	31758330	1	NM_172993	Zfp512	-345	31728700	31728725	31728712	15	15	2.8
5	37534040	37580381	1	NM_007765	Crmp1	510	37534550	37534600	37534562	13	26	2.5
5	44157074	44200622	1	NM_007646	Cd38	251	44157325	44157625	44157462	59	504	40.9
5	53844026	53945693	1	NM_001080928	Rbpsuh	0	53843800	53844075	53843887	42	385	58.5
5	64248032	64188032	-1	NM_145923	AA536743	-943	64248975	64249000	64248987	14	14	2.7
5	65410805	65432767	1	NM_175174	Klhl5	-530	65410025	65410275	65410087	37	303	36.2
5	66042655	66105919	1	NM_001024917	B3bp	-530	66041925	66042125	66042012	21	137	14.7
5	66897806	66581022	-1	NM_009686	Apbb2	0	66897725	66897825	66897812	15	54	10.2
5	89629043	89630644	1	NM_023054	Crlz1	-68	89628775	89628975	89628812	23	162	21.9
5	93158117	93127345	-1	NM_001080797	G3bp2	-708	93158825	93158875	93158862	15	28	4.9
5	93158757	93127345	-1	NM_001080794	G3bp2	-68	93158825	93158875	93158862	15	28	4.9
5	93158757	93127345	-1	NM_001080796	G3bp2	-68	93158825	93158875	93158862	15	28	4.9
5	93158935	93127345	-1	NM_011816	G3bp2	60	93158825	93158875	93158862	15	28	4.9
5	93158935	93127360	-1	NM_001080795	G3bp2	60	93158825	93158875	93158862	15	28	4.9
5	93750331	93683498	-1	NM_177230	4932413O14Rik	-819	93751150	93751200	93751162	19	37	7
5	93758638	94040963	1	NM_015756	Shroom3	-88	93758250	93758550	93758387	52	447	38.8
5	93973201	94040963	1	NM_001077596	Shroom3	-26	93972900	93973175	93973037	48	386	19.7
5	94342776	94351435	1	NM_007635	Ccng2	524	94343300	94343475	94343387	21	126	20.9
5	101038902	101002449	-1	NM_001081107	Hel308	0	101038875	101039075	101038987	24	164	20.1
5	101039060	101044767	1	NM_026826	Mrps18c	0	101038875	101039075	101038987	24	164	20.1
5	104675419	104681352	1	NM_009263	Spp1	-344	104675050	104675075	104675062	14	14	1.7
5	108140891	108148351	1	NM_016980	Rpl5	-116	108140725	108140775	108140762	15	29	3.8
5	108306043	108349302	1	NM_013827	Mtf2	0	108305675	108306050	108305862	97	926	52.9
5	108909677	108924856	1	NM_008325	Idua	-577	108908875	108909100	108908987	42	306	36.3
5	110340270	110344116	1	NM_207279	Plcxd1	-645	110339275	110339625	110339462	28	294	28.3
5	110348499	110344278	-1	NM_145147	Gtpbp6	-176	110348675	110348775	110348687	17	64	8.5
5	115533893	115502769	-1	NM_016698	Rnf10	668	115533000	115533225	115533087	39	282	38
5	115561933	115559421	-1	NM_019682	Dynll1	0	115561925	115562200	115562087	34	273	25.4
5	116852816	116700271	-1	NM_026886	1500001A10Rik	0	116852775	116853150	116852962	100	920	43.6
5	121270135	121201118	-1	NM_011286	Rph3a	10	121270075	121270125	121270087	15	29	5.6
5	122418895	122435884	1	NM_013636	Ppp1cc	-145	122418675	122418750	122418687	14	41	5.6
5	122614812	122586124	-1	NM_144912	Rad9b	-88	122614900	122614925	122614912	14	14	2.8
5	122615029	122623903	1	NM_019780	Vps29	-104	122614900	122614925	122614912	14	14	2.8
5	123981558	123960415	-1	NM_027494	Zcchc8	0	123981550	123981900	123981687	49	480	53.5
5	124859366	124888267	1	NM_026486	Tctn2	59	124859425	124859450	124859437	15	15	2.4
5	128915813	128918801	1	NM_175284	Fzd10	-313	128915300	128915500	128915412	18	123	15.8
5	130172173	130165864	-1	NM_024166	Chchd2	-702	130172875	130173000	130172987	20	79	15.2
5	130471882	130499039	1	NM_019983	Rabgef1	-57	130471600	130471825	130471687	24	181	23
5	134923955	134904503	-1	NM_033561	Wbscr1	-170	134924125	134924225	134924187	22	77	14.8
5	135471995	135529194	1	NM_011714	Baz1b	-520	135471450	135471475	135471462	14	14	2.8
5	135829742	135692656	-1	NM_146001	Hip1	-408	135830150	135830200	135830162	19	36	7
5	136219151	136193035	-1	NM_018871	Ywhag	-374	136219525	136219575	136219562	32	63	10.9
5	137314921	137317977	1	NM_001039385	Vgf	-21	137314700	137314900	137314712	17	123	24.2
5	137783342	137799361	1	NM_031404	Actl6b	0	137783125	137783375	137783187	34	272	27.9
5	138509725	138503447	-1	NM_172412	Gpc2	0	138509725	138509925	138509887	19	134	16.3
5	138510296	138542181	1	NM_016964	Stag3	-371	138509725	138509925	138509887	19	134	16.3
5	138671263	138690482	1	NM_028130	Zfp157	-138	138671000	138671125	138671037	22	96	12.6
5	142882057	142921844	1	NM_178398	Wipi2	-257	142881775	142881800	142881787	22	22	3.9
5	143082527	143019784	-1	NM_178242	Zfp469	-223	143082750	143083150	143082937	41	482	51.7
5	143171864	143168255	-1	NM_007393	Actb	839	143170825	143171025	143170937	22	144	22.3
5	148267668	148624431	1	NM_029920	C130038G02Rik	782	148268450	148268500	148268487	23	45	7.8
5	149363386	149357578	-1	NM_010439	Hmgb1	0	149363325	149363575	149363462	42	325	36.2
5	149495066	149525783	1	NM_001013378	Uspl1	0	149495050	149495075	149495062	20	20	3.8
5	149904694	149885223	-1	NM_013559	Hsp110	-406	149905100	149905175	149905137	20	53	9.8
5	150933991	150904351	-1	NM_201369	BC037393	-334	150934325	150934400	150934337	20	54	9.2
5	151919587	151911202	-1	NM_027009	Rfc3	-188	151919775	151919800	151919787	13	13	2.4
4	11003351	10978194	-1	NM_001085493	2310030N02Rik	-49	11003400	11003425	11003412	14	14	2.8
4	11313930	11259184	-1	NM_194055	Rbm35a	0	11313900	11314100	11314037	19	135	24.3
4	15872654	15844387	-1	NM_026172	Decr1	-196	15872850	15872975	15872887	18	82	10.3
4	25890633	25699963	-1	NM_010243	Fut9	933	25889525	25889700	25889662	24	130	20.9
4	26437282	26415136	-1	NM_172865	Manea	-568	26437850	26437875	26437862	13	13	1.3
4	33252118	33132647	-1	NM_001012450	Ankrd6	0	33251925	33252300	33252162	63	643	63.7
4	33252118	33132647	-1	NM_080471	Ankrd6	0	33251925	33252300	33252162	63	643	63.7
4	33577400	33574035	-1	NM_001033225	Pnrc1	0	33577250	33577425	33577337	24	143	18.3
4	34739501	34755794	1	NM_001007589	2700059D21Rik	-76	34739350	34739425	34739362	21	56	10.2
4	43514503	43517020	1	NM_001037913	LOC622404	-428	43513925	43514075	43514012	23	125	20.5
4	43896699	43965620	1	NM_016678	Reck	-199	43896450	43896500	43896462	15	28	3.6
4	48561598	48583019	1	NM_028137	5730528L13Rik	-348	48561225	48561250	48561237	13	13	2.4
4	57041483	56970066	-1	NM_175518	D730040F13Rik	0	57041450	57041650	57041612	32	208	35.5
4	59877909	59863706	-1	NM_001013577	1110054O05Rik	0	59877900	59877950	59877937	15	29	5
4	82888974	82924571	1	NM_029949	Snapc3	-49	82888650	82888925	82888712	27	237	34.8
4	85525145	85899613	1	NM_029967	Adamtsl1	-495	85524625	85524650	85524637	13	13	2.2
4	88193739	88189522	-1	NM_172871	Klhl9	-261	88194000	88194050	88194012	13	26	4.7
4	90892002	90742784	-1	NM_207685	Elavl2	352	90891550	90891650	90891612	17	62	10.6
4	106409401	106547625	1	NM_023672	Ssbp3	-801	106408450	106408600	106408537	22	116	20.8
4	106409401	106547625	1	NM_198438	Ssbp3	-801	106408450	106408600	106408537	22	116	20.8
4	108331516	108312226	-1	NM_027453	Btf3l4	-109	108331625	108331775	108331737	27	135	22.6
4	108332609	108360049	1	NM_025334	Txndc12	-834	108331625	108331775	108331737	27	135	22.6
4	109475956	109481616	1	NM_172296	Dmrta2	-56	109475875	109475900	109475887	15	15	2.8
4	110912937	110957857	1	NM_026279	2310026E23Rik	-12	110912900	110912925	110912912	13	13	2.4
4	115719845	115800986	1	NM_181585	Pik3r3	-695	115719050	115719150	115719062	16	61	10.2
4	116055658	116091813	1	NM_029868	Gpbp1l1	967	116056625	116056650	116056637	24	24	4.5
4	116218897	116302169	1	NM_146151	Tesk2	-147	116218700	116218750	116218712	32	63	12.1
4	116749849	116713121	-1	NM_001033774	Gm1661	-351	116750200	116750250	116750237	18	34	6.6
4	116749920	116766512	1	NM_026837	Tmem53	280	116750200	116750250	116750237	18	34	6.6
4	120595878	120556872	-1	NM_172700	Zmpste24	0	120595875	120595950	120595887	18	54	9.2
4	125970725	125941807	-1	NM_153403	Eif2c1	500	125970100	125970225	125970112	13	63	11.5
4	126831465	126827540	-1	NM_008126	Gjb3	0	126831325	126831675	126831587	47	473	65.2
4	128963982	128990734	1	NM_133889	Bsdc1	-307	128963650	128963675	128963662	15	15	2.9
4	128993074	128991311	-1	NM_080442	Tssk3	0	128992975	128993250	128993112	31	249	31.8
4	128993493	128994260	1	NM_001085491	1700125D06Rik	-243	128992975	128993250	128993112	31	249	31.8
4	129175055	129146287	-1	NM_008468	Kpna6	-20	129175075	129175100	129175087	14	14	2.7
4	129244586	129217162	-1	NM_011317	Khdrbs1	-14	129244600	129244850	129244712	17	146	26.8
4	129811081	129817766	1	NM_010174	Fabp3	-856	129810100	129810225	129810137	25	107	19.7
4	131805722	131802637	-1	NM_007512	Atpif1	22	131805625	131805700	131805687	16	44	8.5
4	131911121	131996838	1	NM_210071	Eya3	-21	131910975	131911100	131911037	14	65	11.9
4	131911121	131996838	1	NM_211357	Eya3	-21	131910975	131911100	131911037	14	65	11.9
4	131911131	131996838	1	NM_010166	Eya3	-31	131910975	131911100	131911037	14	65	11.9
4	133290892	133275405	-1	NM_145833	Lin28	0	133290825	133291075	133290912	35	280	23.3
4	133559908	133547083	-1	NM_146156	Pdik1l	0	133559875	133560025	133559937	18	100	12.3
4	133740486	133745915	1	NM_019641	Stmn1	0	133740450	133740875	133740712	53	547	28.5
4	136320771	136251808	-1	NM_198248	Zbtb40	0	136320650	136320825	136320762	29	167	25.6
4	136866264	136930612	1	NM_130879	Usp48	-764	136865475	136865500	136865487	15	15	2.9
4	140514959	140529638	1	NM_172520	Arhgef19	-109	140514675	140514850	140514737	21	130	23.9
4	140573315	140601453	1	NM_010139	Epha2	0	140573250	140573350	140573262	19	63	10.2
4	151135462	151129771	-1	NM_008237	Hes3	887	151134300	151134575	151134412	19	177	27.1
4	153804722	153806171	1	NM_010419	Hes5	-147	153804550	153804575	153804562	14	14	1.7
4	154468668	154493732	1	NM_007661	Cdc2l1	-93	154468550	154468575	154468562	20	20	3.9
4	154513027	154498273	-1	NM_145124	Mib2	-923	154513950	154514325	154514162	70	664	49.7
7	4355989	4354881	-1	NM_183406	Cox6b2	989	4354850	4355000	4354937	25	134	25.8
7	5987319	6000650	1	NM_175247	Zfp28	-144	5987150	5987175	5987162	15	15	2.4
7	11384168	11388578	1	NM_001039951	Zfp606	0	11384050	11384175	11384062	17	83	14.4
7	11384168	11402099	1	NM_026112	Zfp606	0	11384050	11384175	11384062	17	83	14.4
7	11735239	11750752	1	NM_022981	Zfp110	-89	11735075	11735150	11735087	18	48	8
7	11924339	11931208	1	NM_011588	Trim28	-214	11924100	11924125	11924112	14	14	2.8
7	15773515	15652994	-1	NM_172739	Grlf1	-835	15774350	15774375	15774362	13	13	2.2
7	15939867	15956796	1	NM_009201	Slc1a5	-92	15939575	15939775	15939712	27	179	29.5
7	16050307	16053957	1	NM_010320	Gng8	-32	16050175	16050275	16050212	17	59	10.8
7	18540560	18554214	1	NM_007949	Ercc2	-110	18540325	18540450	18540337	22	91	14
7	18666853	18664326	-1	NM_177692	Bloc1s3	-172	18667025	18667300	18667112	74	602	35.2
7	18667250	18674667	1	NM_025960	Trappc6a	0	18667025	18667300	18667112	74	602	35.2
7	18731865	18723470	-1	NM_027189	Gemin7	215	18731575	18731650	18731587	14	39	7.3
7	18857688	18854765	-1	NM_009696	Apoe	0	18857675	18857850	18857737	30	187	29.2
7	18873951	18859834	-1	NM_001109748	Tomm40	-599	18874550	18874725	18874687	21	121	20.4
7	18873951	18859834	-1	NM_016871	Tomm40	-599	18874550	18874725	18874687	21	121	20.4
7	24215945	24224424	1	NM_146183	2410005H09Rik	-45	24215575	24215900	24215737	47	445	59.6
7	24593473	24598562	1	NM_023133	Rps19	-573	24592750	24592900	24592887	26	148	25.4
7	26889909	26888500	-1	NM_019394	Mia1	484	26889275	26889425	26889362	23	123	19.4
7	28401608	28408094	1	NM_207238	Fbxo27	-58	28401350	28401550	28401437	41	276	40.9
7	28889433	28882946	-1	NM_026545	Psmd8	0	28889275	28889600	28889412	34	328	45.7
7	29692716	29733871	1	NM_001033355	Zfp568	-866	29691550	29691850	29691687	49	437	36.6
7	30154321	30143741	-1	NM_007467	Aplp1	-29	30154350	30154475	30154412	18	80	10.5
7	30202417	30222162	1	NM_019546	Prodh2	-517	30201600	30201900	30201737	46	385	41.8
7	30297486	30277614	-1	NM_029274	Wbp7	-314	30297800	30298000	30297887	35	232	40.9
7	30334911	30325733	-1	NM_025628	Cox6b1	-714	30335625	30335750	30335662	17	81	14.4
7	35043083	35101045	1	NM_027897	Rhpn2	942	35044025	35044200	35044062	32	184	31.6
7	37728302	37668761	-1	NM_011274	C80913	-698	37729000	37729075	37729062	16	44	7.3
7	43475266	43486321	1	NM_028913	4933405K07Rik	759	43476025	43476300	43476162	64	532	44.1
7	45583249	45578326	-1	NM_020011	Sphk2	-126	45583375	45583425	45583387	23	45	8.8
7	45682358	45674678	-1	NM_001112701	Pscd2	0	45682350	45682525	45682487	32	198	27.4
7	45682358	45674678	-1	NM_011181	Pscd2	0	45682350	45682525	45682487	32	198	27.4
7	46583718	46580039	-1	NM_011315	Saa3	-532	46584250	46584400	46584312	19	106	15.4
7	73411134	73303120	-1	NM_001081345	Chd2	-266	73411400	73411550	73411512	21	110	19.7
7	83508201	83518513	1	NM_023377	Stard5	-51	83508100	83508150	83508137	15	29	5.7
7	83760526	83756679	-1	NM_030705	Mesdc1	-549	83761075	83761325	83761187	34	267	25.3
7	84481935	84461355	-1	NM_010176	Fah	-665	84482600	84482775	84482712	20	121	16.9
7	92616905	92712308	1	NM_029494	Rab30	-55	92616750	92616850	92616762	19	69	10.6
7	97246819	97267347	1	NM_199035	Alg8	206	97247025	97247325	97247187	64	522	52.4
7	98531761	98465797	-1	NM_172280	2210018M11Rik	-89	98531850	98532000	98531912	25	142	25.3
7	101176175	101163702	-1	NM_001111111	Atg16l2	-75	101176250	101176275	101176262	17	17	3.1
7	107386442	107536061	1	NM_008905	Ppfibp2	-817	107385600	107385625	107385612	17	17	3.4
7	109852878	109886569	1	NM_009281	Zfp143	-378	109852475	109852500	109852487	13	13	2.5
7	118496887	118479706	-1	NM_019580	Mir16	0	118496850	118497025	118496962	21	127	18
7	119687440	119707899	1	NM_029610	Lyrm1	435	119687875	119688075	119687937	22	157	26
7	120773461	120748185	-1	NM_007672	Cdr2	-14	120773475	120773675	120773562	28	178	23.7
7	121950584	121961023	1	NM_011121	Plk1	0	121950575	121950650	121950612	15	42	7.4
7	122761711	122771331	1	NM_175023	Rbbp6	-711	122760875	122761000	122760912	16	75	11.5
7	122761711	122793720	1	NM_011247	Rbbp6	-711	122760875	122761000	122760912	16	75	11.5
7	123006013	123064398	1	NM_146198	Slc5a11	362	123006375	123006400	123006387	13	13	2.4
7	126374368	126362547	-1	NM_009907	Cln3	-357	126374725	126374775	126374737	22	40	6.7
7	126486931	126482283	-1	NM_029420	Giyd2	881	126485800	126486050	126485937	20	166	30.4
7	127002755	127005435	1	NM_016754	Mylpf	770	127003525	127003600	127003587	25	64	10.5
7	127024590	127029002	1	NM_146201	Zfp553	-640	127023825	127023950	127023912	33	156	29.7
7	127537922	127560075	1	NM_172748	Fbxl19	-922	127536575	127537000	127536637	33	433	81.1
7	127667971	127656506	-1	NM_146259	Zfp668	0	127667950	127668150	127668062	35	218	32.8
7	127668848	127677136	1	NM_172749	6820429M01	-698	127667950	127668150	127668062	35	218	32.8
7	127795624	127802535	1	NM_001079932	Trim72	476	127796100	127796125	127796112	15	15	2.7
7	140818748	140821147	1	NM_026820	Ifitm1	377	140819125	140819200	140819137	19	58	11
7	140819395	140821147	1	NM_001112715	Ifitm1	-195	140819125	140819200	140819137	19	58	11
7	141067179	141069978	1	NM_025886	Rassf7	-554	141066575	141066625	141066587	13	26	4.7
6	3448404	3553307	1	NM_024260	Ccdc132	-4	3448300	3448400	3448362	29	104	16.9
6	4036927	4026903	-1	NM_009748	Bet1	-98	4037025	4037100	4037037	25	71	11.6
6	11875880	11958012	1	NM_029404	Phf14	0	11875875	11875975	11875912	16	58	8.9
6	22825502	23002917	1	NM_001081306	Ptprz1	-152	22825050	22825350	22825212	39	329	32.7
6	29222681	29225452	1	NM_023516	2310016C08Rik	-81	29222550	29222600	29222562	14	28	5
6	30341020	30316397	-1	NM_172735	Zc3hc1	-55	30341075	30341100	30341087	14	14	2.8
6	33179307	33903086	1	NM_009148	Exoc4	-257	33179025	33179050	33179037	15	15	2.9
6	38464468	38469057	1	NM_025363	1110001J03Rik	-993	38463450	38463475	38463462	17	17	3.4
6	39349976	39327427	-1	NM_018810	Mkrn1	-299	39350275	39350650	39350312	27	358	64.4
6	47173981	47230957	1	NM_025771	Cntnap2	0	47173750	47174000	47173862	37	297	43
6	47743098	47725727	-1	NM_009787	Pdia4	-27	47743125	47743300	47743212	24	143	18.4
6	48605720	48608290	1	NM_174960	Gimap9	555	48606275	48606425	48606362	21	113	13.1
6	49193638	49173506	-1	NM_198102	Tra2a	0	49193575	49193750	49193737	23	130	20.5
6	49248938	49271167	1	NM_175098	Ccdc126	-63	49248825	49248875	49248837	14	28	5
6	50039962	50128166	1	NM_019939	Mpp6	-312	50039625	50039650	50039637	13	13	1.4
6	51474105	51520253	1	NM_028035	Snx10	-5	51473850	51474100	51473937	46	358	50
6	51942132	51788748	-1	NM_018773	Scap2	-918	51943050	51943075	51943062	13	13	2.1
6	57632213	57668057	1	NM_133737	Lancl2	-188	57631925	57632025	57631962	17	60	8
6	58526249	58622028	1	NM_011920	Abcg2	-849	58525125	58525400	58525287	34	268	11
6	64658723	64660813	1	NM_007500	Atoh1	-198	64658300	64658525	64658437	30	217	25.6
6	66966985	66964673	-1	NM_007836	Gadd45a	0	66966900	66967075	66966962	24	153	22.5
6	85927301	85907904	-1	NM_028099	Dusp11	-74	85927375	85927450	85927387	13	39	5
6	86975537	86994049	1	NM_020045	Nfu1	-737	86974675	86974800	86974712	16	73	10.8
6	87879616	87902252	1	NM_173737	8430410A17Rik	-241	87879175	87879375	87879287	32	214	36.7
6	88431063	88463207	1	NM_019685	Ruvbl1	-88	88430875	88430975	88430887	17	67	12.8
6	93879017	93646940	-1	NM_001083321	Magi1	567	93878050	93878450	93878362	21	245	38.3
6	93879153	93640917	-1	NM_001083320	Magi1	703	93878050	93878450	93878362	21	245	38.3
6	115217468	115211234	-1	NM_080639	Timp4	-357	115217825	115217975	115217862	20	97	15.2
6	115642254	115584191	-1	NM_029780	Raf1	0	115642250	115642275	115642262	17	17	3.4
6	115804031	115776347	-1	NM_001110506	BC060267	156	115803850	115803875	115803862	20	20	3.9
6	118385036	118349000	-1	NM_194339	Bms1l	-14	118385050	118385125	118385087	14	41	5.7
6	119383102	119318769	-1	NM_197985	Adipor2	-23	119383125	119383300	119383187	22	132	23
6	120003398	119889956	-1	NM_198703	Wnk1	-902	120004300	120004475	120004412	33	194	31
6	122673186	122679397	1	NM_028016	Nanog	0	122672850	122673200	122673012	93	888	62.4
6	122673401	122679174	1	NM_001080945	LOC634428	-201	122672850	122673200	122673012	93	888	62.4
6	124706698	124704804	-1	NM_013535	Grcc10	-2	124706700	124706900	124706862	28	200	32.5
6	124795066	124780638	-1	NM_013700	Usp5	291	124794625	124794775	124794687	39	203	37.6
6	125005466	125014883	1	NM_133345	Ing4	-216	125005225	125005250	125005237	35	35	7
6	125157205	125133627	-1	NM_146171	2810406C15Rik	0	125157100	125157250	125157162	24	130	23
6	125157818	125160011	1	NM_025595	Mrpl51	-568	125157100	125157250	125157162	24	130	23
6	125287471	125310559	1	NM_011324	Scnn1a	-596	125286750	125286875	125286837	22	101	18.4
6	126905174	126889037	-1	NM_009013	Rad51ap1	-251	126905425	126905475	126905462	18	35	6.8
6	126905584	126941323	1	NM_138594	D6Wsu163e	-109	126905425	126905475	126905462	18	35	6.8
6	129315978	129330996	1	NM_177686	Clec12a	-278	129315425	129315700	129315562	31	253	41.6
6	134001399	134235838	1	NM_007961	Etv6	-349	134000825	134001050	134000987	25	184	21.2
6	134795891	134823576	1	NM_177687	Crebl2	-16	134795600	134795875	134795737	42	329	29.5
6	134853414	134834852	-1	NM_008157	Gpr19	-286	134853700	134853850	134853737	36	184	36.3
6	137134693	137019020	-1	NM_181988	Rerg	43	137134400	137134650	137134562	25	214	22.1
6	142528578	142522160	-1	NM_008428	Kcnj8	-522	142529100	142529325	142529262	24	179	21.4
6	143057329	142968141	-1	NM_001109688	5730419I09Rik	-21	143057350	143057450	143057387	19	68	10.6
6	143057329	142968141	-1	NM_029081	5730419I09Rik	-21	143057350	143057450	143057387	19	68	10.6
6	143057329	142968141	-1	NM_029897	5730419I09Rik	-21	143057350	143057450	143057387	19	68	10.6
6	145005971	144956318	-1	NM_001024468	Bcat1	-29	145006000	145006150	145006062	23	125	17.2
6	145168060	145132089	-1	NM_177222	Casc1	-665	145168725	145168925	145168787	43	289	37.4
6	145168333	145173695	1	NM_133688	4930469P12Rik	392	145168725	145168925	145168787	43	289	37.4
6	146591762	146559445	-1	NM_026281	Tm7sf3	-388	146592150	146592300	146592162	16	81	13.8
6	148169192	148136487	-1	NM_026168	Ergic2	-8	148169200	148169225	148169212	16	16	2.8
6	148169544	148141152	-1	NM_026355	Ergic2	319	148169200	148169225	148169212	16	16	2.8
6	148903602	148878235	-1	NM_019643	Tera	0	148903600	148903875	148903737	22	185	24.6
9	18042668	18064402	1	NM_025844	Chordc1	-118	18042500	18042550	18042512	15	28	5.3
9	19372529	19400132	1	NM_172918	Zfp75	-129	19372275	19372400	19372387	22	89	15.4
9	20357876	20366309	1	NM_175110	5730577I03Rik	99	20357975	20358075	20358012	16	60	8.4
9	20393208	20388190	-1	NM_013911	Fbxl12	-442	20393650	20393700	20393662	20	40	7.7
9	20393719	20397191	1	NM_025401	Ubl5	-19	20393650	20393700	20393662	20	40	7.7
9	21366570	21453768	1	NM_011417	Smarca4	180	21366750	21366825	21366787	14	41	6.4
9	21886148	21877128	-1	NM_001102405	Acp5	73	21885975	21886075	21885987	15	58	7.7
9	22058040	22027150	-1	NM_145612	BC005471	0	22058000	22058100	22058087	19	66	11.2
9	26748995	26723587	-1	NM_025862	Acad8	0	26748925	26749025	26749012	28	93	15.4
9	26749122	26756780	1	NM_144543	Thyn1	-97	26748925	26749025	26749012	28	93	15.4
9	31957764	32010849	1	NM_177379	Grit	0	31957675	31957775	31957712	16	60	10.2
9	36958003	36972881	1	NM_025464	1810021J13Rik	-53	36957925	36957950	36957937	21	21	3.6
9	37098063	37025505	-1	NM_001081429	Ccdc15	763	37097150	37097300	37097262	19	98	13.8
9	42150924	42080617	-1	NM_009347	Tecta	-76	42151000	42151025	42151012	13	13	1.5
9	43818015	43846620	1	NM_198092	Usp2	0	43817750	43818025	43817912	32	263	35.2
9	43835914	43846620	1	NM_198091	Usp2	-539	43835350	43835375	43835362	14	14	2.5
9	44085709	44087066	1	NM_010436	H2afx	-934	44084275	44084775	44084387	34	492	82.1
9	44524003	44543709	1	NM_023831	1500035H01Rik	-3	44523975	44524000	44523987	16	16	3.1
9	49551299	49254375	-1	NM_001081445	Ncam1	24	49551175	49551275	49551262	17	58	7.5
9	49551299	49254375	-1	NM_001113204	Ncam1	24	49551175	49551275	49551262	17	58	7.5
9	49551299	49267368	-1	NM_010875	Ncam1	24	49551175	49551275	49551262	17	58	7.5
9	51799514	51841103	1	NM_001104616	Rdx	-14	51799300	51799500	51799412	20	144	24.9
9	51800305	51827542	1	NM_001104617	Rdx	-805	51799300	51799500	51799412	20	144	24.9
9	51800305	51841103	1	NM_009041	Rdx	-805	51799300	51799500	51799412	20	144	24.9
9	55339285	55344315	1	NM_027397	Isl2	-135	55339025	55339150	55339087	16	71	10.2
9	56216187	55999262	-1	NM_172924	C230081A13Rik	-788	56216975	56217150	56217112	22	137	20
9	56216982	56295071	1	NM_025812	Hmg20a	0	56216975	56217150	56217112	22	137	20
9	57319368	57330561	1	NM_007747	Cox5a	-693	57318650	57318675	57318662	17	17	3.4
9	57813153	57825160	1	NM_019779	Cyp11a1	-478	57812600	57812675	57812637	14	40	7.1
9	59284380	59186559	-1	NM_019927	Arih1	-245	59284625	59284775	59284737	18	94	11.6
9	59454613	59477381	1	NM_011099	Pkm2	-138	59454350	59454475	59454362	15	72	11.7
9	62944986	62936181	-1	NM_172446	Lbxcor1	186	62944600	62944800	62944737	28	172	23.2
9	63819327	63751149	-1	NM_008542	Smad6	-698	63820025	63820150	63820062	15	73	13.7
9	63970937	63935151	-1	NM_026507	Zwilch	-213	63971150	63971175	63971162	22	22	3.9
9	63971392	63976568	1	NM_024212	Rpl4	-217	63971150	63971175	63971162	22	22	3.9
9	64138463	64105016	-1	NM_172519	AV340375	863	64137350	64137600	64137462	41	316	33.2
9	64535762	64513305	-1	NM_017382	Rab11a	-363	64536125	64536300	64536137	16	107	15.8
9	65012695	65037225	1	NM_177460	Parp16	255	65012950	65012975	65012962	14	14	2.5
9	65474553	65488306	1	NM_010952	Oaz2	-28	65474400	65474525	65474412	26	103	18.3
9	70341941	70391235	1	NM_026337	Sltm	-16	70341825	70341925	70341837	15	56	8.2
9	70342033	70391395	1	NM_025690	Sltm	-108	70341825	70341925	70341837	15	56	8.2
9	72605840	72714439	1	NM_175485	Prtg	885	72606725	72607000	72606862	49	384	36.7
9	74824336	74846916	1	NM_021548	Arpp19	-36	74824150	74824300	74824237	20	111	20
9	75195268	75172810	-1	NM_027418	Mapk6	743	75194450	75194525	75194462	16	47	8.5
9	77977649	77995033	1	NM_010357	Gsta4	-124	77977500	77977525	77977512	22	22	4
9	78153883	78152737	-1	NM_025274	Dppa5a	-467	78154350	78154700	78154512	74	707	51.3
9	78267408	78264137	-1	NM_010106	Eef1a1	83	78267225	78267325	78267262	15	57	6.6
9	78401460	78501935	1	NM_153098	Cd109	-10	78401275	78401450	78401362	16	97	17
9	82772207	82662876	-1	NM_001081216	Phip	-193	82772400	82772425	82772412	13	13	1.4
9	94479260	95038800	1	NM_177909	Slc9a9	465	94479725	94479925	94479837	17	123	14.1
9	96920393	96886362	-1	NM_138756	Slc25a36	-57	96920450	96920650	96920562	27	188	27
9	100844227	100791389	-1	NM_025835	Pccb	577	100843600	100843650	100843612	18	35	5.7
9	102578229	102591567	1	NM_019764	Amotl2	0	102578125	102578325	102578187	24	159	15.1
9	103921464	103905859	-1	NM_025692	Ube1dc1	-136	103921600	103921650	103921612	13	26	4.7
9	103922047	103985991	1	NM_175324	Acad11	-397	103921600	103921650	103921612	13	26	4.7
9	106029029	106049807	1	NM_029896	Wdr82	996	106030025	106030300	106030162	42	349	39.9
9	107794020	107807791	1	NM_145621	Camkv	455	107794475	107794650	107794562	22	126	13.7
9	107860748	107906881	1	NM_013785	Ihpk1	-723	107860000	107860025	107860012	19	19	3.5
9	108250928	108255858	1	NM_053216	1700102P08Rik	-28	108250750	108250900	108250812	35	185	29.7
9	108425445	108423968	-1	NM_023247	4733401H18Rik	45	108425200	108425400	108425287	27	181	23.5
9	114488772	114434575	-1	NM_153585	Cnot10	-303	114489075	114489225	114489112	34	193	29.6
9	118455406	118749701	1	NM_133721	Itga9	944	118456350	118456575	118456412	30	220	26.8
9	119998439	120018074	1	NM_001039365	Mobp	0	119998025	119998475	119998262	197	1901	73.3
9	119998439	120024789	1	NM_001039364	Mobp	0	119998025	119998475	119998262	197	1901	73.3
9	119998439	120024789	1	NM_008614	Mobp	0	119998025	119998475	119998262	197	1901	73.3
9	120782172	120809204	1	NM_007614	Ctnnb1	-797	120781250	120781375	120781287	19	91	14.9
9	123378579	123441296	1	NM_030692	Sacm1l	-229	123378325	123378350	123378337	13	13	2.2
8	3567997	3584776	1	NM_001024728	C330021F23Rik	-72	3567625	3567925	3567887	58	550	86.3
8	4259274	4257645	-1	NM_183315	Ctxn1	199	4258850	4259075	4258962	22	164	19.6
8	11556037	11563222	1	NM_011919	Ing1	-412	11555550	11555625	11555562	19	57	10.1
8	13869705	13880544	1	NM_181854	D8Ertd457e	-305	13869300	13869400	13869312	13	52	7.4
8	23242099	23260730	1	NM_007843	Defb1	-224	23241550	23241875	23241712	44	378	34.1
8	23526264	23533834	1	NM_183142	Alg11	686	23526950	23526975	23526962	13	13	2.4
8	24118959	24093810	-1	NM_011130	Polb	0	24118950	24119000	24118987	14	27	4.3
8	24673891	24638490	-1	NM_018743	Agpat6	0	24673850	24673900	24673887	14	27	4.7
8	24877062	24915175	1	NM_013834	Sfrp1	-862	24876100	24876200	24876112	24	94	17.5
8	25904491	25903160	-1	NM_026931	1810011O10Rik	841	25903625	25903650	25903637	13	13	2.2
8	26289914	26198529	-1	NM_007401	Adam5	239	26289450	26289675	26289487	28	206	30.6
8	27313215	27282414	-1	NM_001080793	Ash2l	0	27313200	27313475	27313312	62	515	68.4
8	28551776	28589354	1	NM_054044	Gpr124	-826	28550925	28550950	28550937	17	17	3.4
8	32577780	32597406	1	NM_175136	Rnf122	395	32578175	32578275	32578187	16	56	10.1
8	32616250	32626023	1	NM_144927	BC019943	-450	32615575	32615800	32615712	35	253	29
8	32616250	32630638	1	NM_001112729	BC019943	-450	32615575	32615800	32615712	35	253	29
8	32653266	32703727	1	NM_134161	Fut10	0	32653125	32653275	32653212	28	161	28.1
8	32653312	32727418	1	NM_001012517	Fut10	-37	32653125	32653275	32653212	28	161	28.1
8	36276126	36288411	1	NM_176933	Dusp4	-451	36275525	36275675	36275537	16	87	12.8
8	37718033	37684580	-1	NM_001081150	Lonrf1	-967	37719000	37719025	37719012	13	13	1.1
8	47384301	47418363	1	NM_016798	Pdlim3	-101	47384175	47384200	47384187	13	13	2.2
8	48050885	48078401	1	NM_027973	Mlf1ip	-160	48050600	48050725	48050637	32	155	28.6
8	55576229	55685152	1	NM_009506	Vegfc	-879	55574950	55575350	55575137	161	1500	62.7
8	63885361	64022376	1	NM_175089	Nek1	0	63885325	63885425	63885362	16	61	11.2
8	64820230	64929837	1	NM_001081215	BC013672	-755	64819225	64819475	64819362	26	218	36.6
8	69415496	69405334	-1	NM_025465	1810029B16Rik	-4	69415500	69415575	69415562	21	58	10.8
8	72554164	72539642	-1	NM_001045553	AI449175	-486	72554650	72554725	72554662	28	83	14.5
8	72554537	72539642	-1	NM_172754	AI449175	-113	72554650	72554725	72554662	28	83	14.5
8	72903372	72836057	-1	NM_001113346	Gatad2a	-78	72903450	72903475	72903462	13	13	2.1
8	73060321	73062737	1	NM_001025586	2310073E15Rik	-996	73059125	73059325	73059187	38	278	45.5
8	73060321	73062737	1	NM_001025587	2310073E15Rik	-996	73059125	73059325	73059187	38	278	45.5
8	73212038	73223339	1	NM_011984	Homer3	0	73212025	73212100	73212037	14	39	4.3
8	74521172	74525256	1	NM_025396	Pgls	-547	74520475	74520625	74520562	34	179	31
8	74539986	74553900	1	NM_146211	Glt25d1	39	74540025	74540075	74540037	26	50	9.1
8	86055456	86163045	1	NM_001111304	Tbc1d9	0	86055325	86055525	86055362	24	175	33.9
8	86055456	86163045	1	NM_027758	Tbc1d9	0	86055325	86055525	86055362	24	175	33.9
8	86332753	86324597	-1	NM_019708	Scoc	0	86332650	86332850	86332762	40	257	42.3
8	86542782	86554893	1	NM_018771	Gipc1	-32	86542550	86542750	86542587	31	209	28.2
8	86790202	86832059	1	NM_181039	Lphn1	-177	86789850	86790025	86789887	19	112	22.2
8	87127147	87101047	-1	NM_172503	Zswim4	0	87127050	87127150	87127137	22	70	11.5
8	87305468	87530354	1	NM_007578	Cacna1a	-568	87304800	87304900	87304862	17	60	10.3
8	87856116	87846714	-1	NM_027187	Rnaseh2a	-959	87857075	87857125	87857087	17	34	6.1
8	88322936	88298863	-1	NM_025722	4921524J17Rik	336	88322575	88322600	88322587	15	15	2.9
8	88382721	88417663	1	NM_173866	Gpt2	-671	88381975	88382050	88382037	15	41	7
8	93718941	93944613	1	NM_177224	Chd9	-516	93718200	93718425	93718337	82	601	78.9
8	97812822	97832409	1	NM_001033468	Gpr114	-947	97811750	97811875	97811862	20	95	18.4
8	108716479	108657438	-1	NM_145824	Ranbp10	254	108716200	108716225	108716212	14	14	2.8
8	108716872	108733805	1	NM_024445	Tsnaxip1	-647	108716200	108716225	108716212	14	14	2.8
8	109304467	109315018	1	NM_011764	Zfp90	0	109304325	109304525	109304437	24	167	29.3
8	109824878	109903321	1	NM_009229	Sntb2	-3	109824725	109824875	109824762	26	125	17.2
8	111603772	111850765	1	NM_007496	Atbf1	-672	111603025	111603100	111603087	20	54	10.1
8	112582393	112560457	-1	NM_028018	2400003C14Rik	518	112581600	112581875	112581762	34	288	31.7
8	112667768	112750064	1	NM_009677	Ap1g1	-18	112667625	112667750	112667637	28	128	24.3
8	113806541	113859174	1	NM_009179	St3gal2	0	113806425	113806550	113806437	29	111	20.5
8	124836622	124915348	1	NM_001110100	Banp	-497	124836025	124836125	124836087	53	206	36.2
8	124836622	124915348	1	NM_016812	Banp	-497	124836025	124836125	124836087	53	206	36.2
8	126692114	126721377	1	NM_009003	Rab4a	761	126692875	126692950	126692887	22	64	11.6
8	127608065	127557416	-1	NM_145607	Ttc13	-60	127608125	127608200	127608137	22	65	12.6
8	127608228	127620213	1	NM_026855	Arv1	-28	127608125	127608200	127608137	22	65	12.6
8	131571870	131619285	1	NM_010578	Itgb1	-145	131571550	131571725	131571562	18	112	13.1
X	7363460	7350810	-1	NM_016913	Porcn	-565	7364025	7364625	7364162	31	487	48
X	7363460	7350810	-1	NM_023638	Porcn	-565	7364025	7364625	7364162	31	487	48
X	7363460	7350810	-1	NM_145907	Porcn	-565	7364025	7364625	7364162	31	487	48
X	7363460	7350810	-1	NM_145908	Porcn	-565	7364025	7364625	7364162	31	487	48
X	7409365	7395626	-1	NM_133991	Ftsj1	-160	7409525	7409550	7409537	14	14	2.7
X	11236827	11194251	-1	NM_029510	Bcor	777	11235950	11236050	11235962	13	52	2.8
X	11236827	11194251	-1	NM_175044	Bcor	777	11235950	11236050	11235962	13	52	2.8
X	11236827	11194251	-1	NM_175046	Bcor	777	11235950	11236050	11235962	13	52	2.8
X	11237013	11193698	-1	NM_175045	Bcor	963	11235950	11236050	11235962	13	52	2.8
X	16729256	16713527	-1	NM_028058	Fundc1	456	16728525	16728800	16728637	36	279	18.2
X	19845451	19856836	1	NM_011049	Pctk1	-751	19844625	19844700	19844637	14	41	7.3
X	20005556	20017477	1	NM_009703	Araf	-406	20005125	20005150	20005137	13	13	2.4
X	20218997	20183142	-1	NM_001013387	Zfp182	-253	20219250	20219500	20219362	32	263	20
X	20218997	20183142	-1	NM_001111076	Zfp182	-253	20219250	20219500	20219362	32	263	20
X	22850075	22962960	1	NM_175180	Wdr44	850	22850925	22850950	22850937	13	13	0.8
X	34820823	34776247	-1	NM_001110142	Cul4b	0	34820800	34821025	34820887	25	184	16.9
X	34820823	34776247	-1	NM_028288	Cul4b	0	34820800	34821025	34820887	25	184	16.9
X	34845284	34858149	1	NM_026902	Mcts1	-184	34845000	34845100	34845062	23	79	14
X	56494427	56402739	-1	NM_133197	Mcf2	-48	56494475	56494650	56494512	20	119	20
X	75924154	75875949	-1	NM_028025	2410003J06Rik	-71	75924225	75924475	75924337	25	185	22.9
X	82444493	82448663	1	NM_007430	Nr0b1	-168	82444300	82444325	82444312	13	13	2.4
X	89884874	89557485	-1	NM_008892	Pola1	-201	89885075	89885125	89885087	13	26	4
X	96697063	96718720	1	NM_008784	Igbp1	-38	96696875	96697025	96696887	16	90	15.1
X	97288071	97281940	-1	NM_007515	Slc7a3	746	97286850	97287325	97287062	101	1102	45.2
X	97425282	97300504	-1	NM_001110311	Snx12	-68	97425350	97425625	97425462	18	175	25.1
X	97425282	97414679	-1	NM_001110310	Snx12	-68	97425350	97425625	97425462	18	175	25.1
X	97425282	97414679	-1	NM_018875	Snx12	-68	97425350	97425625	97425462	18	175	25.1
X	97842782	97887068	1	NM_139144	Ogt	-7	97842600	97842775	97842687	23	132	15.1
X	98322183	98330390	1	NM_027181	Pin4	-33	98321925	98322150	98322012	34	260	24
X	99524116	99532943	1	NM_007674	Cdx4	-41	99523950	99524075	99524012	15	68	11.2
X	100184003	100159885	-1	NM_011276	Rnf12	-622	100184625	100184900	100184762	24	195	26.1
X	102214505	102173196	-1	NM_025952	2610529C04Rik	-395	102214900	102215075	102214987	21	127	18.6
X	130064352	130068274	1	NM_030066	Armcx1	-102	130063900	130064250	130064087	60	558	39.8
X	131518569	131516445	-1	NM_025703	Tceal8	-206	131518775	131518950	131518837	15	95	11.3
X	132384664	132327479	-1	NM_001082412	2810402A17Rik	439	132383825	132384225	132384012	46	483	24.6
X	135128717	135125966	-1	NM_001037915	Ripply1	-433	135129150	135129375	135129262	27	196	22.3
X	135802976	135822503	1	NM_021463	Prps1	-26	135802625	135802950	135802787	39	352	22.8
X	145928865	145912223	-1	NM_029943	Apex2	-185	145929050	145929125	145929062	13	39	5.3
X	148459501	148473577	1	NM_001034894	EG436240	349	148459850	148460075	148459962	24	177	21.6
X	150603215	150638223	1	NM_019736	Acot9	-65	150602850	150603150	150602987	31	275	21.2
X	152836151	152788058	-1	NM_009214	Sms	-349	152836500	152836800	152836637	31	276	27.2
X	152942820	152891926	-1	NM_172307	Mbtps2	0	152942800	152942825	152942812	14	14	2.5
X	153162539	153164474	1	NM_001081667	Klhl34	-689	153161675	153161850	153161737	21	123	9.9
X	160671086	160473121	-1	NM_183427	Glra2	-489	160671575	160671675	160671612	16	60	7
11	4604680	4637669	1	NM_026015	Zmat5	770	4605450	4605475	4605462	13	13	2.4
11	4749530	4665850	-1	NM_010898	Nf2	-120	4749650	4749775	4749687	27	108	17.7
11	5641179	5613420	-1	NM_178623	2010005J08Rik	-46	5641225	5641600	5641437	71	674	47.9
11	6174840	6170716	-1	NM_134020	Tmed4	-10	6174850	6175050	6174912	38	270	43.3
11	6315872	6319813	1	NM_008907	Ppia	-397	6315350	6315475	6315362	16	78	12
11	9018105	9036167	1	NM_009477	Upp1	-805	9016950	9017300	9017137	123	1088	59.8
11	17853848	17839894	-1	NM_026576	Etaa1	373	17853375	17853475	17853387	19	64	12.6
11	33478957	33450780	-1	NM_146017	Gabrp	-43	33479000	33479050	33479037	14	27	4.9
11	34214821	34322639	1	NM_001025382	MGC99845	479	34215300	34215675	34215537	43	452	41.5
11	45798917	45791576	-1	NM_001080969	Thg1l	-83	45799000	45799050	45799012	16	30	5.2
11	60233200	60216824	-1	NM_145427	Atpaf2	0	60233175	60233350	60233287	31	194	26
11	60233497	60261472	1	NM_025757	4933439F18Rik	-147	60233175	60233350	60233287	31	194	26
11	61893291	62039208	1	NM_001029936	Specc1	-216	61892925	61893075	61892937	15	87	14.4
11	62663317	62693657	1	NM_001033669	Fbxw10	-117	62663125	62663200	62663137	14	40	3.4
11	66841348	66850985	1	NM_177392	A730055C05Rik	-823	66840050	66840525	66840312	89	950	73.2
11	68875969	68877771	1	NM_028005	2310047M10Rik	-69	68875800	68875900	68875837	18	66	9.6
11	70248847	70256869	1	NM_145429	Arrb2	-222	70248500	70248625	70248537	19	89	15.4
11	72864074	72896411	1	NM_025818	1200014J11Rik	-124	72863925	72863950	72863937	14	14	2.8
11	72993232	72991727	-1	NM_025318	Tmem93	-68	72993300	72993325	72993312	13	13	2.5
11	72993277	72998241	1	NM_029564	Tax1bp3	23	72993300	72993325	72993312	13	13	2.5
11	77502349	77534161	1	NM_001024205	Nufip2	-474	77501600	77501875	77501762	38	326	26
11	77710067	77696809	-1	NM_008952	Pipox	0	77710025	77710425	77710237	163	1541	85.5
11	80293240	80297374	1	NM_009871	Cdk5r1	-415	80292775	80292825	80292787	13	26	2.5
11	83289302	83322935	1	NM_027427	Taf15	-52	83289125	83289250	83289137	22	98	16.6
11	86573687	86510849	-1	NM_001003908	Cltc	-13	86573700	86573725	86573712	13	13	2.2
11	86890243	86850089	-1	NM_025638	Gdpd1	-82	86890325	86890350	86890337	17	17	3.4
11	89846437	89852595	1	NM_026433	Tmem100	613	89847050	89847150	89847087	18	63	11.2
11	90207007	90152624	-1	NM_172563	Hlf	-693	90207700	90207850	90207762	18	97	15.4
11	93860294	93942170	1	NM_001025428	Spag9	831	93861125	93861325	93861287	21	152	13.8
11	93860294	93942170	1	NM_001025429	Spag9	831	93861125	93861325	93861287	21	152	13.8
11	93860294	93942170	1	NM_001025430	Spag9	831	93861125	93861325	93861287	21	152	13.8
11	95483079	95496862	1	NM_008831	Phb	-29	95482925	95483050	95482937	38	155	26.1
11	96181847	96183766	1	NM_008266	Hoxb1	-147	96181575	96181700	96181637	17	81	12.3
11	96605225	96624730	1	NM_007622	Cbx1	0	96605100	96605275	96605112	15	95	14.9
11	97479501	97501548	1	NM_139311	Mllt6	-876	97478400	97478625	97478537	42	320	44.4
11	98557962	98581201	1	NM_178060	Thra	13	98557975	98558175	98558087	20	120	12.1
11	100136085	100138182	1	NM_011508	Eif1	-60	100135975	100136025	100135987	17	32	6
11	100213829	100186710	-1	NM_010593	Jup	604	100213200	100213225	100213212	15	15	2.9
11	100436258	100398933	-1	NM_019795	Dnajc7	308	100435825	100435950	100435887	22	103	17.3
11	100755601	100702899	-1	NM_011486	Stat3	-149	100755750	100755925	100755787	35	209	33.1
11	100755601	100702899	-1	NM_213659	Stat3	-149	100755750	100755925	100755787	35	209	33.1
11	100755601	100702899	-1	NM_213660	Stat3	-149	100755750	100755925	100755787	35	209	33.1
11	101368045	101304853	-1	NM_009764	Brca1	-680	101368725	101368850	101368812	36	165	28.5
11	101368947	101398034	1	NM_008676	Nbr1	-97	101368725	101368850	101368812	36	165	28.5
11	101398331	101407875	1	NM_144830	Tmem106a	-406	101397675	101397925	101397787	30	255	27.8
11	101444038	101452171	1	NM_025654	Rdm1	-213	101443500	101443825	101443762	25	231	33.8
11	101904592	101873108	-1	NM_016695	Mpp2	817	101903650	101903775	101903762	15	68	10.8
11	102046262	102011838	-1	NM_001077696	Hdac5	37	102046200	102046225	102046212	13	13	1.7
11	102046262	102011838	-1	NM_010412	Hdac5	37	102046200	102046225	102046212	13	13	1.7
11	102420520	102424148	1	NM_020510	Fzd2	-670	102419550	102419850	102419687	68	582	34.8
11	102932414	102935814	1	NM_138753	Hexim1	-539	102931625	102931875	102931762	26	223	28.3
11	102950126	102955986	1	NM_027658	Hexim2	-951	102948975	102949175	102949137	33	228	31.8
11	108241355	108676705	1	NM_029606	Ccdc46	-780	108240175	108240575	108240437	34	404	48.9
11	108736438	108766871	1	NM_015732	Axin2	462	108736900	108736925	108736912	13	13	0.8
11	109811906	109750362	-1	NM_013851	Abca8b	106	109811725	109811800	109811787	20	53	9.2
11	113525610	113514261	-1	NM_026682	D11Ertd636e	-490	113526100	113526275	113526137	30	191	36.2
11	113526107	113514261	-1	NM_029794	D11Ertd636e	0	113526100	113526275	113526137	30	191	36.2
11	114611982	114606758	-1	NM_028055	1500005I02Rik	382	114611550	114611600	114611587	22	41	8.1
11	115352320	115339198	-1	NM_133354	Sumo2	-180	115352500	115352525	115352512	13	13	2.2
11	115840594	115838050	-1	NM_008211	H3f3b	0	115840575	115840775	115840712	33	208	32.4
11	120300758	120304843	1	NM_027204	Mrpl12	-108	120300625	120300650	120300637	14	14	2.8
11	120640637	120622047	-1	NM_007988	Fasn	-363	120641000	120641025	120641012	14	14	2.7
10	5913936	5891401	-1	NM_024261	1700052N19Rik	-64	5914000	5914150	5914037	18	89	16.8
10	5914206	5943366	1	NM_025343	Rmnd1	-56	5914000	5914150	5914037	18	89	16.8
10	8576260	8412408	-1	NM_175155	Sash1	-240	8576500	8576775	8576537	24	226	31.3
10	17412661	17415065	1	NM_010828	Cited2	0	17412500	17412700	17412687	17	128	24.9
10	17924397	17903100	-1	NM_144820	Ccdc28a	-228	17924625	17924750	17924662	20	90	14.5
10	19045954	19048020	1	NM_053008	Olig3	-329	19045600	19045625	19045612	17	17	3.2
10	27764235	28286813	1	NM_008983	Ptprk	590	27764825	27764850	27764837	13	13	2.5
10	30345283	30334997	-1	NM_001111267	Ncoa7	-67	30345350	30345500	30345387	31	165	25.1
10	36828342	36822658	-1	NM_008538	Marcks	0	36828300	36828500	36828387	26	185	25.1
10	39947081	39938618	-1	NM_026113	2410016F19Rik	-694	39947775	39948200	39948037	48	514	55.4
10	44147163	44125591	-1	NM_007548	Prdm1	388	44146725	44146775	44146762	14	27	3.1
10	44977719	45006865	1	NM_024286	Popdc3	-769	44976775	44976950	44976912	24	142	16.6
10	45158616	45065047	-1	NM_001031772	Lin28b	191	45158100	45158425	45158187	26	270	41.5
10	53285375	53297628	1	NM_025541	Asf1a	-75	53285100	53285300	53285237	19	128	15.5
10	59347127	59345031	-1	NM_029083	Ddit4	-148	59347275	59347450	59347412	14	88	10.8
10	60778665	60715018	-1	NM_013753	X99384	990	60777600	60777675	60777662	17	46	8.5
10	60848026	60827853	-1	NM_010124	Eif4ebp2	-149	60848175	60848200	60848187	14	14	2.4
10	61179221	61134003	-1	NM_207000	H2afy2	871	61178100	61178350	61178212	37	287	36
10	61626575	61580752	-1	NM_197996	Tspan15	-75	61626650	61626700	61626687	15	28	4.7
10	62187613	62139818	-1	NM_026201	Ccar1	-237	62187850	62187875	62187862	18	18	3.5
10	63485612	63323853	-1	NM_178678	Lrrtm3	0	63485525	63485850	63485712	70	597	43.3
10	66492214	66406864	-1	NM_178606	Reep3	714	66491275	66491500	66491437	30	236	33.7
10	69320888	69422793	1	NM_009670	Ank3	162	69321050	69321125	69321112	32	89	16.3
10	69320888	69422793	1	NM_170687	Ank3	162	69321050	69321125	69321112	32	89	16.3
10	75365304	75340490	-1	NM_011418	Smarcb1	404	75364875	75364900	75364887	13	13	2.1
10	75376179	75366939	-1	NM_008606	Mmp11	0	75376175	75376300	75376262	20	88	10.1
10	79312021	79297838	-1	NM_198107	Thrap5	146	79311775	79311875	79311862	16	61	8.9
10	79551418	79561496	1	NM_021565	Midn	882	79552300	79552800	79552637	19	342	56.6
10	79570969	79574782	1	NM_007705	Cirbp	-244	79570625	79570725	79570637	20	66	11.5
10	79802608	79795669	-1	NM_013595	Mbd3	508	79801825	79802100	79801937	26	227	38.8
10	80304098	80302578	-1	NM_013895	Timm13	-27	80304125	80304175	80304137	21	40	7.8
10	80333219	80335333	1	NM_008655	Gadd45b	-44	80333025	80333175	80333112	29	151	23.7
10	80768949	80767152	-1	NM_001014836	4930404N11Rik	0	80768875	80769075	80768962	17	119	19
10	80787639	80791479	1	NM_133964	Hlrc1	-214	80787375	80787425	80787412	27	52	9.1
10	81477925	81491384	1	NM_001024626	BC062115	50	81477975	81478125	81478112	17	91	13.3
10	84185846	84336335	1	NM_001024918	Rfx4	0	84185625	84186000	84185762	56	565	44.1
10	84267946	84336337	1	NM_027689	Rfx4	954	84268900	84269250	84269087	64	570	46.9
10	87290909	87345569	1	NM_184052	Igf1	0	87290775	87291075	87290912	28	259	37.3
10	87290909	87366846	1	NM_001111274	Igf1	0	87290775	87291075	87290912	28	259	37.3
10	87290909	87366846	1	NM_001111276	Igf1	0	87290775	87291075	87290912	28	259	37.3
10	93465547	93397898	-1	NM_172538	Vezt	-53	93465600	93465650	93465612	14	27	3.9
10	93465799	93575138	1	NM_053072	Fgd6	-149	93465600	93465650	93465612	14	27	3.9
10	94944849	94975345	1	NM_080560	Ube2n	-374	94944375	94944475	94944412	17	62	7.8
10	96046714	96049313	1	NM_007569	Btg1	-14	96046475	96046700	96046587	28	210	18
10	98692918	98697172	1	NM_026268	Dusp6	-68	98692700	98692850	98692787	34	175	27.2
10	116467924	116455107	-1	NM_007636	Cct2	-151	116468075	116468100	116468087	13	13	1.5
10	117544824	117571990	1	NM_148922	Mdm1	-224	117544550	117544600	117544562	13	26	4.5
10	117544916	117551131	1	NM_010785	Mdm1	-316	117544550	117544600	117544562	13	26	4.5
10	127772986	127766045	-1	NM_001081040	Coq10a	-39	127773025	127773225	127773087	45	294	41.3
10	128029189	128027485	-1	NM_013765	Rps26	-611	128029800	128029950	128029837	22	108	21.4
10	128147005	128123083	-1	NM_016811	Dgka	880	128146025	128146125	128146062	15	55	8
13	21723608	21723228	-1	NM_178199	Hist1h2bl	-167	21723775	21723800	21723787	13	13	2.4
13	21723886	21724278	1	NM_178182	Hist1h2ai	-86	21723775	21723800	21723787	13	13	2.4
13	21729562	21729942	1	NM_178200	Hist1h2bm	-237	21729300	21729325	21729312	14	14	2.7
13	21742560	21742870	1	NM_178210	Hist1h4j	290	21742850	21743125	21743012	40	308	37.7
13	21790862	21790379	-1	NM_178207	Hist1h3i	-188	21791050	21791075	21791062	14	14	2.7
13	21794683	21794292	-1	NM_178184	Hist1h2an	308	21793875	21794375	21794112	72	833	25.3
13	21794952	21796678	1	NM_178202	Hist1h2bp	-577	21793875	21794375	21794112	72	833	25.3
13	21952558	21967948	1	NM_183014	Zfp184	117	21952675	21952850	21952737	20	120	15.9
13	22048817	22048280	-1	NM_175656	Hist1h4i	0	22048800	22048975	22048812	14	89	15.2
13	22050694	22051074	1	NM_178198	Hist1h2bj	906	22051600	22051700	22051637	14	53	10.2
13	23538514	23538984	1	NM_153173	Hist1h4h	-39	23538450	23538475	23538462	22	22	4.2
13	23550817	23550437	-1	NM_178197	Hist1h2bh	-83	23550900	23551100	23550987	23	154	17.3
13	23551429	23553277	1	NM_013548	Hist1h3f	196	23551625	23551900	23551737	18	173	31.8
13	23559108	23558798	-1	NM_175655	Hist1h4f	583	23558500	23558525	23558512	15	15	2.9
13	23578685	23577981	-1	NM_178187	Hist1h2ae	0	23578600	23578850	23578687	24	181	24.9
13	23578860	23579478	1	NM_178196	Hist1h2bg	-10	23578600	23578850	23578687	24	181	24.9
13	23705914	23705604	-1	NM_178208	Hist1h4c	0	23705875	23706150	23706037	26	219	38.7
13	23752986	23752507	-1	NM_175653	Hist1h3c	11	23752950	23752975	23752962	13	13	2.4
13	23754198	23754666	1	NM_175664	Hist1h2bb	-23	23754000	23754175	23754037	18	110	16.6
13	23768622	23768312	-1	NM_178192	Hist1h4a	0	23768600	23768875	23768687	20	178	26.3
13	23769851	23769317	-1	NM_013550	Hist1h3a	-99	23769950	23770200	23770037	26	206	25.7
13	23771132	23771878	1	NM_030609	Hist1h1a	0	23771100	23771175	23771137	19	52	9.1
13	33913173	33887280	-1	NM_148942	Serpinb6c	-2	33913175	33913250	33913212	19	55	9.2
13	40745894	40727709	-1	NM_011547	Tcfap2a	794	40745025	40745100	40745037	15	45	7.4
13	40928607	40971865	1	NM_133219	Gcnt2	-7	40928400	40928600	40928487	30	215	27
13	42691594	43149482	1	NM_198419	Phactr1	-944	42690450	42690650	42690512	17	126	12.8
13	43626954	43679875	1	NM_183204	Rnf182	-954	43625625	43626000	43625812	33	347	39.5
13	51859190	51860968	1	NM_011817	Gadd45g	0	51858875	51859200	51859062	43	371	43.7
13	54793624	54798078	1	NM_001033269	Gm273	-524	54792850	54793100	54792962	32	259	25.7
13	54793641	54797098	1	NM_001039683	Gm273	-541	54792850	54793100	54792962	32	259	25.7
13	56261785	56260122	-1	NM_010896	Neurog1	0	56261725	56261875	56261762	18	97	5.4
13	60186988	60184027	-1	NM_008086	Gas1	-312	60187300	60187350	60187312	13	26	5
13	62897859	62874376	-1	NM_019395	Fbp1	909	62896775	62896950	62896812	18	114	11.9
13	64932255	64937971	1	NM_030047	4930458L03Rik	-5	64932175	64932250	64932212	15	41	2.9
13	67341099	67336369	-1	NM_026219	Uqcrb	-76	67341175	67341225	67341187	20	39	7.1
13	73794457	73785877	-1	NM_010888	Ndufs6	0	73794450	73794500	73794462	13	26	5
13	81347116	81359738	1	NM_001042591	Arrdc3	-491	81346450	81346625	81346487	25	143	23.5
13	90216716	90129513	-1	NM_001081249	Cspg2	-784	90217500	90217575	90217562	15	41	7.8
13	91698226	91409587	-1	NM_025770	Atg10	101	91697875	91698125	91697962	34	263	29.6
13	93711890	93812697	1	NM_172588	Serinc5	860	93712750	93712975	93712812	30	226	19.6
13	96797618	96803467	1	NM_010170	F2rl2	-243	96797350	96797375	96797362	14	14	1.7
13	98341868	98353733	1	NM_007930	Enc1	-68	98341750	98341800	98341762	14	27	3.1
13	100616697	100524597	-1	NM_008634	Mtap1b	997	100615650	100615700	100615687	14	27	5
13	101876156	101859942	-1	NM_021886	Cenph	981	101875150	101875175	101875162	13	13	2.4
13	116222842	116078958	-1	NM_001033228	Itga1	942	116221525	116221900	116221637	25	299	23.7
13	120527884	120453189	-1	NM_008710	Nnt	-191	120528075	120528150	120528112	20	57	10.8
12	8947314	8964747	1	NM_008640	Laptm4a	236	8947550	8947700	8947562	26	147	22.6
12	12967822	12962078	-1	NM_008709	Mycn	0	12967800	12968025	12967937	32	228	31.4
12	25420677	25549378	1	NM_001083341	Mboat2	-352	25420150	25420325	25420237	16	106	12.4
12	25420677	25549378	1	NM_026037	Mboat2	-352	25420150	25420325	25420237	16	106	12.4
12	29222193	29217368	-1	NM_011300	Rps7	0	29222100	29222275	29222237	34	197	30.9
12	32535470	32511721	-1	NM_153198	Hbp1	645	32534650	32534825	32534737	17	102	13.4
12	32535470	32514631	-1	NM_177993	Hbp1	645	32534650	32534825	32534737	17	102	13.4
12	34014870	34024626	1	NM_172253	Twistnb	-570	34014200	34014300	34014262	17	65	8.7
12	35114121	34956749	-1	NM_024124	Hdac9	0	35114000	35114300	35114137	41	349	42.5
12	35632288	35730451	1	NM_001014973	Snx13	-838	35631100	35631450	35631262	53	504	13.5
12	39290732	39378626	1	NM_007960	Etv1	-657	39289700	39290075	39289887	62	576	38.8
12	52269976	52295391	1	NM_001015099	6030408C04Rik	-276	52269400	52269700	52269537	51	442	35.9
12	54170302	54993801	1	NM_013780	Npas3	573	54170875	54171000	54170937	15	70	5.4
12	55617491	55595092	-1	NM_025456	1810011O16Rik	-834	55618325	55618400	55618337	19	47	7.7
12	70077675	70076329	-1	NM_009093	Rps29	-625	70078300	70078450	70078412	16	83	16.1
12	72055280	72041777	-1	NM_001024853	Timm9	-420	72055700	72055725	72055712	13	13	2.5
12	72055280	72041777	-1	NM_001024854	Timm9	-420	72055700	72055725	72055712	13	13	2.5
12	72055280	72041777	-1	NM_013896	Timm9	-420	72055700	72055725	72055712	13	13	2.5
12	73003897	72992011	-1	NM_026038	2810055F11Rik	-303	73004200	73004325	73004212	14	69	7.1
12	73004706	73019424	1	NM_024205	1200003C05Rik	319	73005025	73005050	73005037	16	16	2.9
12	73836603	73799946	-1	NM_029444	Six6os1	-97	73836700	73836725	73836712	13	13	2.5
12	81031853	81026599	-1	NM_007564	Zfp36l1	0	81031850	81031975	81031962	20	83	13.3
12	82403958	82389551	-1	NM_025461	1810020G14Rik	983	82402950	82402975	82402962	14	14	2.2
12	84521981	84572871	1	NM_027349	Rbm25	-81	84521775	84521900	84521862	32	146	27
12	84899249	84907415	1	NM_012006	Acot1	-24	84898925	84899225	84899037	48	413	48.9
12	85885423	85959618	1	NM_178363	Ylpm1	-23	85885150	85885400	85885287	42	334	48.5
12	87773914	87769805	-1	NM_145836	6430527G18Rik	-986	87774900	87775175	87774987	26	222	39.8
12	88155830	88163055	1	NM_146036	Ahsa1	-380	88155400	88155450	88155412	30	58	10.9
12	102119552	102049651	-1	NM_001082976	Mtac2d1	-398	102119950	102120150	102120012	16	119	20.1
12	103159722	103142766	-1	NM_022323	Moap1	-328	103160050	103160200	103160112	34	174	27
12	108451221	108358209	-1	NM_001079883	Bcl11b	796	108450250	108450425	108450287	15	95	12.7
12	108451221	108358209	-1	NM_021399	Bcl11b	796	108450250	108450425	108450287	15	95	12.7
12	111487605	111561192	1	NM_198023	Rcor1	-880	111486675	111486725	111486687	15	28	4.7
12	112120076	112117169	-1	NM_021273	Ckb	0	112120050	112120200	112120087	15	87	9.8
12	113588354	113593312	1	NM_024223	Crip2	-204	113587825	113588150	113587987	34	327	41.1
12	113604228	113612352	1	NM_134041	4930427A07Rik	247	113604475	113604600	113604587	29	134	24.7
12	119682378	119606904	-1	NM_177290	Itgb8	53	119682100	119682325	119682262	28	200	27
15	12266220	12295990	1	NM_025673	Golph3	780	12267000	12267150	12267112	24	126	19.4
15	13118364	12978926	-1	NM_007666	Cdh6	0	13118350	13118550	13118437	23	153	19.6
15	25309634	25308954	-1	NM_027395	Basp1	-166	25309800	25309875	25309837	17	50	8.9
15	34387811	34385098	-1	NM_009083	Rpl30	-664	34388475	34388525	34388487	13	26	5
15	38023442	37911916	-1	NM_001081359	Ubr5	842	38022175	38022600	38022337	74	752	69.4
15	38023442	37911916	-1	NM_001112721	Ubr5	842	38022175	38022600	38022337	74	752	69.4
15	39687541	39598558	-1	NM_022722	Dpys	616	39686775	39686925	39686887	30	164	27.9
15	43112810	43080114	-1	NM_008388	Eif3s6	-115	43112925	43112950	43112937	14	14	2.8
15	57742281	57800151	1	NM_001081396	Wdr67	-81	57742100	57742200	57742112	25	91	17.6
15	66721061	66752868	1	NM_018865	Wisp1	-536	66720350	66720525	66720412	20	121	15.2
15	74782907	74786586	1	NM_008529	Ly6e	293	74783200	74783500	74783362	49	446	37.6
15	76497128	76495561	-1	NM_007989	Foxh1	0	76497000	76497225	76497137	25	191	23
15	77783890	77767782	-1	NM_001017983	D15Bwg0759e	165	77783475	77783725	77783587	38	277	45.1
15	78630297	78602392	-1	NM_130859	Card10	-953	78631250	78631275	78631262	13	13	2.5
15	79486481	79494913	1	NM_028634	Pgea1	-406	79486025	79486075	79486062	21	40	7.1
15	79515074	79501509	-1	NM_028792	Josd1	-226	79515300	79515375	79515362	16	45	7.5
15	81491190	81515560	1	NM_145993	L3mbtl2	-415	81490700	81490775	81490712	15	43	8
15	81557156	81531508	-1	NM_011241	Rangap1	-119	81557275	81557550	81557462	47	421	49.7
15	82977102	82953743	-1	NM_178627	Poldip3	-298	82977400	82977600	82977412	21	141	19.8
15	83422876	83403576	-1	NM_183017	Ttll12	-74	83422950	83423025	83422987	20	56	9.8
15	93226470	93214292	-1	NM_026025	Zcrb1	270	93225900	93226200	93226037	36	304	31.6
15	93226529	93320092	1	NM_001083114	Pphln1	-329	93225900	93226200	93226037	36	304	31.6
15	93226529	93320092	1	NM_146062	Pphln1	-329	93225900	93226200	93226037	36	304	31.6
15	93226529	93320092	1	NM_175363	Pphln1	-329	93225900	93226200	93226037	36	304	31.6
15	97995693	97998168	1	NM_177716	AI836003	32	97995725	97995800	97995737	13	39	6.7
15	98746132	98731954	-1	NM_029098	Lmbr1l	0	98746050	98746225	98746187	20	111	17.5
15	98781535	98777880	-1	NM_011653	Tuba1a	-290	98781825	98781900	98781862	18	48	7.1
15	99530320	99542029	1	NM_031842	Smarcd1	-120	99530125	99530200	99530137	15	42	7.4
15	99703490	99606501	-1	NM_001113545	Lima1	640	99702625	99702850	99702762	48	349	37.7
15	100323273	100307603	-1	NM_153407	BC035295	0	100323250	100323400	100323287	14	81	10.3
15	102991318	102981323	-1	NM_027885	Smug1	0	102991250	102991475	102991387	50	373	55.6
14	18541952	18602483	1	NM_008695	Nid2	-327	18541300	18541625	18541462	24	250	32.8
14	20288405	20460684	1	NM_017479	Myst4	595	20289000	20289025	20289012	14	14	2.1
14	24675338	24719988	1	NM_013469	Anxa11	-888	24674150	24674450	24674337	55	472	63
14	25412744	25461593	1	NM_145969	A630054L15Rik	-269	25412425	25412475	25412462	14	27	3.9
14	25503030	25497300	-1	NM_178668	E430028B21Rik	0	25502875	25503125	25503037	39	308	44.1
14	25827245	25829207	1	NM_010420	Hesx1	80	25827325	25827625	25827437	24	210	36
14	25865884	25934170	1	NM_134437	Il17rd	266	25866150	25866450	25866287	38	318	25.1
14	32276249	32211100	-1	NM_016700	Mapk8	649	32275475	32275600	32275487	15	70	12.6
14	39875520	39815157	-1	NM_145928	Tspan14	-380	39875900	39875975	39875912	13	38	4
14	44580020	44515050	-1	NM_001039106	Ddhd1	0	44580000	44580100	44580037	15	55	6.7
14	44580020	44515050	-1	NM_001042719	Ddhd1	0	44580000	44580100	44580037	15	55	6.7
14	44580020	44515050	-1	NM_176845	Ddhd1	0	44580000	44580100	44580037	15	55	6.7
14	46220190	46244968	1	NM_178684	C130032J12Rik	410	46220600	46220625	46220612	13	13	1.7
14	47584823	47580134	-1	NM_144841	Otx2	-2	47584825	47585150	47584987	43	383	37.4
14	50068718	50066952	-1	NM_011271	Rnase1	-132	50068850	50068875	50068862	14	14	2.1
14	50815590	50818144	1	NM_001039676	Slc39a2	-890	50814600	50814700	50814637	16	62	10.2
14	50938815	50941738	1	NM_001033805	G630016D24Rik	-540	50938200	50938275	50938237	28	79	12.4
14	51025933	50996749	-1	NM_016884	Hnrpc	-242	51026175	51026250	51026212	32	90	15.9
14	51250621	51233133	-1	NM_015772	Sall2	946	51249500	51249675	51249587	20	122	22.2
14	54046119	54015731	-1	NM_001039198	Zfhx2	-281	54046400	54046500	54046462	19	72	12.7
14	54625977	54616337	-1	NM_008683	Nedd8	-298	54626275	54626325	54626312	21	37	7
14	54626305	54632821	1	NM_177992	Gmpr2	0	54626275	54626325	54626312	21	37	7
14	58579417	58585770	1	NM_145463	Tmem46	-842	58578500	58578575	58578562	16	44	8.2
14	60000579	59918145	-1	NM_013869	Tnfrsf19	454	60000025	60000125	60000037	25	92	18
14	60092566	60194803	1	NM_172809	Sacs	384	60092950	60093100	60092987	17	91	13.1
14	61286214	61327102	1	NM_026001	Rnaseh2b	-364	61285550	61285850	61285662	33	290	35.2
14	61791787	61910613	1	NM_175546	Wdfy2	-237	61791475	61791550	61791487	23	64	12.1
14	62131903	62099262	-1	NM_010191	Fdft1	-247	62132150	62132175	62132162	25	25	4.6
14	62498063	62477725	-1	NM_177594	Mtmr9	0	62498050	62498200	62498162	24	128	22.6
14	68812524	68815237	1	NM_018781	Egr3	-574	68811775	68811950	68811912	17	107	15.4
14	69086504	69038548	-1	NM_144808	Slc39a14	-421	69086925	69087375	69087162	167	1769	65.4
14	71972049	71974497	1	NM_175116	P2ry5	526	71972575	71972775	71972687	36	249	36.2
14	74579485	74582452	1	NM_009429	Tpt1	-60	74579275	74579425	74579287	17	88	5.4
14	100540155	100582076	1	NM_016723	Uchl3	-655	100539475	100539500	100539487	14	14	2.7
14	117019504	117047938	1	NM_021434	Gpr180	-129	117019350	117019375	117019362	13	13	2.4
14	121610563	121615508	1	NM_009574	Zic2	-238	121610200	121610325	121610212	13	62	9.4
17	11962641	12062998	1	NM_026644	Agpat4	984	11963625	11963725	11963637	17	68	9.6
17	12850770	12861050	1	NM_013671	Sod2	0	12850700	12850850	12850762	18	91	14.5
17	14430687	14403750	-1	NM_011581	Thbs2	537	14429750	14430150	14429937	64	678	37.1
17	14726722	14769186	1	NM_001034891	9030025P20Rik	-397	14726150	14726325	14726162	18	116	16.6
17	17329107	17232340	-1	NM_172827	Lnpep	-868	17329975	17330075	17329987	16	62	11.5
17	20713637	20733553	1	NM_145483	Zfp160	0	20713500	20713750	20713587	26	202	32.5
17	21412440	21430329	1	NM_001008501	BC029103	-40	21412250	21412400	21412262	17	92	17.3
17	23327109	23303473	-1	NM_011747	Zfp13	409	23326675	23326700	23326687	16	16	3.1
17	23328477	23338641	1	NM_001033425	Zscan10	-27	23328400	23328450	23328412	27	53	9.8
17	23513699	23504539	-1	NM_029798	2810417J12Rik	-301	23514000	23514025	23514012	13	13	2.5
17	23571778	23564407	-1	NM_027644	4931440B09Rik	678	23570925	23571100	23571037	17	102	15.5
17	25481927	25476213	-1	NM_018857	Msln	-923	25482850	25482925	25482912	18	50	8.5
17	26236061	26233190	-1	NM_013642	Dusp1	-64	26236125	26236150	26236137	13	13	2.5
17	26784892	26849812	1	NM_080553	Itpr3	-292	26784300	26784600	26784312	19	173	32.3
17	28419033	28475994	1	NM_011951	Mapk14	-183	28418825	28418850	28418837	13	13	2.5
17	28735604	28698475	-1	NM_134115	Stk38	-21	28735625	28736325	28735762	71	1128	138
17	29218056	29222471	1	NM_008842	Pim1	-631	29217225	29217425	29217312	21	140	20.1
17	29732098	29937031	1	NM_148926	Zfand3	-448	29731625	29731650	29731637	13	13	1.3
17	30339671	30319872	-1	NM_001113560	Glo1	-79	30339750	30339900	30339787	22	107	17.2
17	30339671	30319872	-1	NM_025374	Glo1	-79	30339750	30339900	30339787	22	107	17.2
17	30784705	30844993	1	NM_009593	Abcg1	-155	30784200	30784550	30784362	149	1257	50.4
17	31918169	31912475	-1	NM_001033163	Abhd9	-881	31919050	31919075	31919062	15	15	2.9
17	32876675	32872401	-1	NM_177719	Morc2b	275	32876200	32876400	32876287	20	144	24.2
17	33003463	32989003	-1	NM_009542	Zfp101	113	33003300	33003350	33003312	13	26	4.6
17	34172350	34196598	1	NM_010929	Notch4	-150	34172175	34172200	34172187	13	13	2.4
17	34667156	34670149	1	NM_016765	Ddah2	-31	34667050	34667125	34667087	15	42	6.4
17	35114091	35118830	1	NM_013633	Pou5f1	-791	35112875	35113300	35113137	69	738	71.5
17	35446285	35441972	-1	NM_011655	Tubb5	-40	35446325	35446550	35446487	32	236	37.3
17	35449550	35467723	1	NM_001010833	Mdc1	0	35449525	35449550	35449537	13	13	2.5
17	35518098	35507904	-1	NM_028476	2610110G12Rik	0	35518075	35518125	35518087	15	29	4.3
17	36589290	36585753	-1	NM_029747	2410137M14Rik	-960	36590250	36590400	36590312	22	119	20.9
17	42480038	42552546	1	NM_178589	Tnfrsf21	-63	42479925	42479975	42479937	15	30	4.6
17	43130070	43104954	-1	NM_028711	Slc25a27	-30	43130100	43130275	43130187	23	142	17.7
17	43130479	43214486	1	NM_018887	Cyp39a1	-204	43130100	43130275	43130187	23	142	17.7
17	46108333	46093819	-1	NM_029091	Klc4	-917	46109250	46109400	46109312	18	98	12.3
17	46109436	46113322	1	NM_025302	Mrpl2	-36	46109250	46109400	46109312	18	98	12.3
17	46137446	46130645	-1	NM_144857	BC011248	-879	46138325	46138375	46138337	18	36	6.3
17	46832387	46841869	1	NM_183086	Mrps10	-262	46831900	46832125	46831962	42	315	36.9
17	47898295	47884797	-1	NM_009694	Apobec2	345	47897850	47897950	47897887	14	55	8.8
17	55305719	55245183	-1	NM_028370	2810458H16Rik	-31	55305750	55305825	55305762	17	46	7.5
17	55545915	55550314	1	NM_015766	Ebi3	-315	55545275	55545600	55545462	105	903	47.1
17	55602493	55610076	1	NM_026530	Mpnd	-743	55601525	55601750	55601637	44	302	39.5
17	55890530	55894784	1	NM_010192	Fem1a	-830	55889650	55889700	55889662	19	38	7.4
17	55924220	55912670	-1	NM_025836	M6prbp1	-705	55924925	55925100	55925012	26	152	24.7
17	67909003	67747657	-1	NM_172964	Arhgap28	-47	67909050	67909275	67909162	23	171	21.2
17	70756055	70749075	-1	NM_009372	Tgif	0	70756000	70756075	70756012	17	48	8.1
17	74243968	74293466	1	NM_016962	Spast	-243	74243575	74243725	74243662	20	109	13.5
17	74364090	74331276	-1	NM_001033367	Nlrc4	-60	74364150	74364175	74364162	13	13	0.7
17	80115611	80108411	-1	NM_146083	Sfrs7	0	80115550	80115800	80115687	42	332	34.9
17	84866340	84925447	1	NM_011151	Ppm1b	-890	84865300	84865450	84865362	31	169	26.4
17	87883409	87899389	1	NM_010830	Msh6	-984	87882025	87882425	87882262	93	894	71.9
16	13585443	13617190	1	NM_025976	Bfar	7	13585450	13585500	13585462	19	38	7.3
16	13585597	13591963	1	NM_025653	3110001I22Rik	-97	13585450	13585500	13585462	19	38	7.3
16	13900214	14015072	1	NM_144518	2900011O08Rik	611	13900825	13900950	13900912	25	114	18.4
16	16216559	16223205	1	NM_198246	Yars2	-484	16215800	16216075	16215887	24	228	33.2
16	16473712	16335540	-1	NM_139232	Fgd4	562	16472900	16473150	16472987	26	219	23.7
16	16473759	16367036	-1	NM_139234	Fgd4	609	16472900	16473150	16472987	26	219	23.7
16	16784453	16806547	1	NM_011624	Top3b	-353	16784075	16784100	16784087	19	19	3.6
16	17824911	17814271	-1	NM_001081633	Es2el	-114	17825025	17825050	17825037	15	15	2.9
16	17824911	17814271	-1	NM_022408	Es2el	-114	17825025	17825050	17825037	15	15	2.9
16	17841731	17838786	-1	NM_153150	Slc25a1	-744	17842475	17842775	17842587	56	488	45.9
16	18162257	18153541	-1	NM_011239	Ranbp1	0	18162250	18162400	18162337	20	101	15.4
16	18162445	18167065	1	NM_001080999	Htf9c	-45	18162250	18162400	18162337	20	101	15.4
16	18162445	18167065	1	NM_001081000	Htf9c	-45	18162250	18162400	18162337	20	101	15.4
16	18162445	18167065	1	NM_008307	Htf9c	-45	18162250	18162400	18162337	20	101	15.4
16	20011096	20041286	1	NM_029436	Klhl24	0	20011050	20011150	20011062	15	56	7.1
16	20449046	20457596	1	NM_009679	Ap2m1	-46	20448700	20449000	20448812	49	439	61.2
16	21910794	21868057	-1	NM_153404	Liph	-106	21910900	21911150	21910937	35	283	40.2
16	21910886	21866484	-1	NM_001083894	Liph	-14	21910900	21911150	21910937	35	283	40.2
16	22354826	22296569	-1	NM_023794	Etv5	-374	22355200	22355225	22355212	14	14	2.8
16	24308838	24896379	1	NM_178665	Lpp	-738	24308000	24308100	24308012	16	62	11.3
16	32350742	32391762	1	NM_009981	Pcyt1a	-42	32350625	32350700	32350637	14	42	6.8
16	35689103	35614649	-1	NM_153550	Dirc2	-922	35690025	35690100	35690037	13	39	6.4
16	35690132	35748209	1	NM_175111	Hspbap1	-32	35690025	35690100	35690037	13	39	6.4
16	38482190	38510716	1	NM_026407	Tmem39a	-240	38481725	38481950	38481837	34	244	37.3
16	43809008	43780746	-1	NM_029128	Qtrtd1	-92	43809100	43809275	43809112	17	117	23
16	45643863	45630561	-1	NM_019754	Tagln3	-312	45644175	45644350	45644237	22	138	21.4
16	48203356	48213914	1	NM_001018002	Dppa4	0	48203075	48203400	48203237	38	354	50.4
16	48203356	48213914	1	NM_028610	Dppa4	0	48203075	48203400	48203237	38	354	50.4
16	48229895	48239135	1	NM_028615	Dppa2	105	48230000	48230200	48230037	28	196	21.9
16	64713141	64708306	-1	NM_026273	4930453N24Rik	-9	64713150	64713175	64713162	15	15	2.9
16	76255729	76173541	-1	NM_173440	Nrip1	-46	76255775	76255975	76255862	21	140	15.6
16	87588149	87622541	1	NM_007520	Bach1	601	87588750	87588900	87588837	23	112	18.7
16	92288936	92280811	-1	NM_019466	Dscr1	-14	92288950	92288975	92288962	14	14	2.7
19	3851772	3867549	1	NM_001025566	Chka	-172	3851550	3851600	3851562	14	28	4
19	3851772	3894367	1	NM_013490	Chka	-172	3851550	3851600	3851562	14	28	4
19	4811634	4800924	-1	NM_019869	Rbm14	959	4810225	4810675	4810462	214	2084	62.4
19	5088552	5092856	1	NM_026553	Yif1a	-552	5087975	5088000	5087987	15	15	2.8
19	5490454	5494031	1	NM_007687	Cfl1	0	5490325	5490625	5490462	48	421	35.6
19	6084891	6080764	-1	NM_024231	Zfpl1	-484	6085375	6085675	6085537	63	583	58.7
19	6085096	6091773	1	NM_026410	Cdca5	279	6085375	6085675	6085537	63	583	58.7
19	6118586	6116003	-1	NM_133678	Sac3d1	61	6118475	6118525	6118487	16	32	6
19	6241667	6262304	1	NM_194348	1810013C15Rik	-792	6240800	6240875	6240837	16	43	7.4
19	7449870	7424733	-1	NM_001033139	AI846148	-105	7449975	7450150	7450037	16	101	13.1
19	10745116	10736009	-1	NM_021453	Pga5	941	10743750	10744175	10743912	33	415	45.4
19	10936824	10924874	-1	NM_133804	Tmem132a	49	10936700	10936775	10936712	13	39	3.6
19	14665002	14515090	-1	NM_011600	Tle4	2	14664950	14665000	14664962	16	32	5.6
19	24292051	24161598	-1	NM_011597	Tjp2	0	24292000	24292150	24292137	27	129	22.3
19	26815499	26845417	1	NM_026003	Smarca2	-749	26814575	26814750	26814737	17	95	13.4
19	44984429	45037098	1	NM_001081225	6030443O07Rik	-729	44983675	44983700	44983687	17	17	3.4
19	45836602	45803571	-1	NM_023799	Mgea5	-273	45836875	45837125	45836987	28	219	20.8
19	46098522	46085911	-1	NM_001113408	Ldb1	0	46098475	46098675	46098562	26	174	18
19	46652461	46710694	1	NM_146099	D19Wsu162e	-286	46651975	46652175	46652087	26	172	21.5
19	53998191	54086443	1	NM_019658	Shoc2	884	53999075	53999100	53999087	15	15	2.9
19	55795519	55986479	1	NM_009333	Tcf7l2	-444	55795025	55795075	55795062	15	28	5.2
19	60944411	61147218	1	NM_018869	Grk5	-411	60943850	60944000	60943962	22	112	19.6
18	6136096	6024447	-1	NM_001039692	Arhgap12	-554	6136650	6136750	6136662	23	83	14.9
18	6136096	6024447	-1	NM_029277	Arhgap12	-554	6136650	6136750	6136662	23	83	14.9
18	6516085	6435950	-1	NM_007935	Epc1	-590	6516675	6517000	6516812	26	250	27.9
18	10181790	10064400	-1	NM_009071	Rock1	-335	10182125	10182250	10182162	16	74	9.4
18	12786968	12880218	1	NM_028341	2810439F02Rik	632	12787600	12787725	12787662	17	80	10.1
18	12884523	12898311	1	NM_001042418	Cabyr	0	12884325	12884525	12884362	28	178	26
18	12884523	12898311	1	NM_001042419	Cabyr	0	12884325	12884525	12884362	28	178	26
18	12884523	12898311	1	NM_001042420	Cabyr	0	12884325	12884525	12884362	28	178	26
18	12884523	12898311	1	NM_027687	Cabyr	0	12884325	12884525	12884362	28	178	26
18	12884523	12898311	1	NM_181731	Cabyr	0	12884325	12884525	12884362	28	178	26
18	21087634	21126858	1	NM_026301	Rnf125	-609	21086650	21087025	21086837	59	580	47.2
18	24097697	24107678	1	NM_027007	Zfp397	-172	24097500	24097525	24097512	20	20	3.9
18	34132007	33921128	-1	NM_013512	Epb4.1l4a	-68	34132075	34132125	34132112	19	36	6.8
18	34667128	34672862	1	NM_009290	Wnt8a	-303	34666800	34666825	34666812	18	18	3.5
18	35897580	35933135	1	NM_019912	Ube2d2	-330	35897150	35897250	35897162	17	62	12
18	36919896	36925632	1	NM_025594	Zmat2	0	36919875	36919900	36919887	25	25	4.9
18	37573630	37577068	1	NM_053139	Pcdhb14	-280	37573300	37573350	37573312	13	26	1.5
18	37603741	37609011	1	NM_053141	Pcdhb16	159	37603900	37603975	37603937	19	47	7.8
18	37787918	37967844	1	NM_033584	Pcdhga1	-268	37787600	37787650	37787637	14	27	4.2
18	37806431	37967844	1	NM_033574	Pcdhgb1	-281	37806100	37806150	37806112	13	26	4.9
18	37811373	37967844	1	NM_033587	Pcdhga4	-198	37811150	37811175	37811162	16	16	2.9
18	38727242	38712241	-1	NM_011898	Spry4	-8	38727250	38727650	38727437	59	635	53.5
18	45685484	45811213	1	NM_080465	Kcnn2	-709	45684575	45684775	45684687	20	138	18.7
18	46337856	46291175	-1	NM_178872	Trim36	-319	46338175	46338575	46338337	47	522	49.9
18	49958342	50090415	1	NM_001081371	Dmxl1	433	49958775	49958850	49958787	15	44	7.7
18	53869916	53807092	-1	NM_178686	AU016693	-84	53870000	53870025	53870012	13	13	1.5
18	58003083	58072190	1	NM_009194	Slc12a2	167	58003250	58003475	58003337	25	172	20.7
18	61139568	61120749	-1	NM_201353	Slc6a7	818	61138725	61138750	61138737	13	13	2.1
18	61161568	61144233	-1	NM_009880	Cdx1	-7	61161575	61161725	61161637	19	95	7.8
18	65823636	65876906	1	NM_177028	5330437I02Rik	-261	65823350	65823375	65823362	20	20	3.6
18	66064458	66060007	-1	NM_013833	Rax	-17	66064475	66064500	66064487	13	13	1.7
18	67330791	67332368	1	NM_024190	Chmp1b	-141	67330625	67330650	67330637	13	13	2.1
18	67414591	67444210	1	NM_053261	Impa2	-491	67413950	67414100	67414012	29	159	27.7
18	69469860	69813336	1	NM_013685	Tcf4	0	69469700	69469950	69469812	18	150	22.8
18	74190318	74053857	-1	NM_172632	Mapk4	693	74189225	74189625	74189437	64	620	52.1
18	75492729	75521299	1	NM_001042660	Smad7	-204	75492400	75492525	75492437	16	74	12
18	80313541	80289194	-1	NM_175028	Adnp2	-634	80314175	80314225	80314187	14	28	5.4
18	80418365	80454773	1	NM_025861	Pqlc1	-15	80418300	80418350	80418337	15	29	3.9
18	85069217	85115585	1	NM_015798	Fbxo15	-392	85068500	85068825	85068637	69	614	49.9

## Sheet: Sox2 ESC Poised Enhancers
CHROM	START	STOP	STRAND	ID1	ID2	DISTANCE	REGION START	REGION END	PEAK POS	PEAK HEIGHT	TOTAL TARGET COUNTS	TOTAL BACKGROUND COUNTS
11	3279475	3281850	1	chr11_3279475	Limk2	0	3280525	3280725	3280637	20	126	17
11	4394325	4395650	1	chr11_4394325	Hormad2	0	4395050	4395200	4395137	27	133	18.7
11	6260475	6260875	1	chr11_6260475	D11Bwg0280e	0	6260550	6260700	6260637	19	99	13.8
11	6678475	6680000	1	chr11_6678475	Ramp3	0	6678625	6679000	6678812	78	770	53.9
11	8047600	8048600	1	chr11_8047600	Tns3	0	8047825	8048250	8047937	38	417	48.7
11	8622700	8624225	1	chr11_8622700	Tns3	0	8623100	8623600	8623362	63	832	64.7
11	8710775	8712025	1	chr11_8710775	Tns3	0	8711775	8712075	8711912	39	327	42.6
11	9883150	9883175	1	chr11_9883150	Abca13	0	9883125	9883325	9883237	17	119	12
11	9950875	9952850	1	chr11_9950875	Abca13	0	9951550	9951975	9951737	106	1086	50.1
11	10997900	10999450	1	chr11_10997900	Vwc2	0	10998250	10998725	10998462	154	1538	46.6
11	11823725	11824025	1	chr11_11823725	Ddc	0	11823875	11824025	11823962	24	124	13.1
11	11841425	11844175	1	chr11_11841425	Ddc	0	11842650	11842850	11842787	37	247	39.4
11	13318100	13318125	1	chr11_13318100	Cobl	0	13317975	13318125	13318037	20	98	8.7
11	17752900	17753800	1	chr11_17752900	Etaa1	0	17753375	17753450	17753412	14	41	6.7
11	18845400	18847075	1	chr11_18845400	Meis1	0	18846200	18846250	18846212	15	29	5.3
11	20037875	20038850	1	chr11_20037875	Actr2	0	20038475	20038900	20038662	57	624	47.1
11	20483525	20486850	1	chr11_20483525	Sertad2	0	20484700	20484750	20484712	15	30	5.2
11	22519375	22523875	1	chr11_22519375	Tmem17	0	22521025	22521225	22521112	44	295	42
11	25893275	25894650	1	chr11_25893275	Fancl	0	25894125	25894475	25894312	53	468	47.8
11	26070075	26071075	1	chr11_26070075	Fancl	0	26070575	26070875	26070712	28	254	31.7
11	26653475	26653925	1	chr11_26653475	Vrk2	0	26653575	26653850	26653737	44	351	32.7
11	29305675	29306825	1	chr11_29305675	A430106J12Rik	0	29306600	29306700	29306612	14	54	7.8
11	29536025	29539575	1	chr11_29536025	Rtn4	0	29536775	29536850	29536837	31	82	15.2
11	31920250	31921125	1	chr11_31920250	Nsg2	0	31920350	31920500	31920362	17	100	18.6
11	32057725	32058600	1	chr11_32057725	Il9r	0	32057750	32057850	32057762	15	59	9.4
11	32579725	32583150	1	chr11_32579725	Fbxw11	0	32581475	32581700	32581562	28	208	27.9
11	32734150	32736150	1	chr11_32734150	Fbxw11	0	32735125	32735475	32735312	67	618	61.4
11	33079650	33080625	1	chr11_33079650	Npm1	0	33079825	33080125	33079937	36	335	14.7
11	34011425	34014150	1	chr11_34011425	Lcp2	0	34012900	34013225	34013062	33	302	28.1
11	34394275	34395800	1	chr11_34394275	MGC99845	0	34394775	34395000	34394887	37	279	41.3
11	34582700	34583225	1	chr11_34582700	Dock2	0	34582150	34582800	34582512	153	1880	79.5
11	35331175	35332300	1	chr11_35331175	mmu-mir-218-2	0	35331525	35331675	35331612	20	98	11.6
11	35631475	35632400	1	chr11_35631475	mmu-mir-103-1	0	35631900	35632175	35632062	36	298	27.5
11	36875250	36876350	1	chr11_36875250	Odz2	0	36875225	36875450	36875287	23	186	27.8
11	39521100	39521875	1	chr11_39521100	Mat2b	0	39521825	39522300	39522112	31	393	39.2
11	39894325	39894375	1	chr11_39894325	Mat2b	0	39893900	39894350	39894037	24	310	43
11	44588900	44591725	1	chr11_44588900	Ebf1	0	44590150	44590550	44590337	79	825	67.9
11	44609875	44611950	1	chr11_44609875	Ebf1	0	44610650	44611075	44610862	77	804	50.6
11	45863400	45864075	1	chr11_45863400	Adam19	0	45863700	45864100	45863912	85	890	39.7
11	49583275	49583975	1	chr11_49583275	Cnot6	0	49583300	49583375	49583312	13	39	6.3
11	50123700	50124975	1	chr11_50123700	Maml1	0	50123750	50123775	50123762	13	13	2
11	52128975	52130475	1	chr11_52128975	Tcf7	0	52129775	52130150	52129962	115	1055	50.8
11	52663325	52665425	1	chr11_52663325	Fstl4	0	52664100	52664400	52664237	26	239	28.5
11	53154275	53155550	1	chr11_53154275	Hspa4	0	53154950	53155000	53154987	15	29	5.6
11	53441200	53444175	1	chr11_53441200	Il4	0	53442875	53443100	53442962	32	242	29
11	55527625	55528950	1	chr11_55527625	Glra1	0	55528525	55528775	55528612	19	158	19.1
11	57313150	57315550	1	chr11_57313150	1810073G14Rik	0	57313925	57314200	57314062	29	226	28.6
11	59059300	59061250	1	chr11_59059300	Arf1	0	59060075	59060225	59060112	16	90	13.3
11	60237850	60240350	1	chr11_60237850	4933439F18Rik	0	60239225	60239475	60239337	33	276	37.6
11	60996975	60998225	1	chr11_60996975	Usp22	0	60997875	60998075	60997937	21	156	21.9
11	61219025	61221550	1	chr11_61219025	1300013J15Rik	0	61220375	61220550	61220462	17	106	14.1
11	61713375	61714875	1	chr11_61713375	Akap10	0	61714075	61714100	61714087	14	14	2.7
11	62170850	62172950	1	chr11_62170850	Ttc19	0	62171575	62171750	62171662	21	119	18.9
11	62203200	62205525	1	chr11_62203200	Ncor1	0	62203225	62203400	62203237	17	105	15.8
11	62996275	62997275	1	chr11_62996275	Pmp22	0	62996350	62996750	62996537	43	452	36.3
11	63092825	63093950	1	chr11_63092825	Pmp22	0	63093000	63093150	63093062	20	109	15.4
11	63349050	63351225	1	chr11_63349050	Hs3st3b1	0	63349750	63350150	63349962	64	645	41.5
11	63904925	63906325	1	chr11_63904925	Cox10	0	63905850	63906175	63905987	31	310	41.9
11	66831750	66834225	1	chr11_66831750	A730055C05Rik	0	66834100	66834350	66834237	32	288	41.3
11	66836275	66838875	1	chr11_66836275	A730055C05Rik	0	66836825	66837000	66836862	25	155	26.1
11	68077575	68080575	1	chr11_68077575	Ntn1	0	68079475	68079525	68079512	14	27	3.4
11	68206425	68211950	1	chr11_68206425	Ntn1	0	68210050	68210550	68210337	70	866	67.9
11	69522350	69528175	1	chr11_69522350	Tnfsf12-tnfsf13	0	69524225	69524475	69524387	42	341	42
11	71317575	71318600	1	chr11_71317575	Nalp1c	0	71318325	71318725	71318512	109	984	33.4
11	71414125	71415000	1	chr11_71414125	BC030477	0	71414050	71414125	71414087	14	40	4.5
11	72236125	72237850	1	chr11_72236125	D130058I21Rik	0	72236700	72237025	72236837	100	849	63.1
11	75166675	75167675	1	chr11_75166675	Smyd4	0	75167575	75167675	75167612	16	59	10.3
11	75651350	75653500	1	chr11_75651350	Doc2b	0	75652300	75652625	75652462	52	442	24.9
11	76078225	76080075	1	chr11_76078225	Rnmtl1	0	76078925	76079025	76078962	17	63	7.8
11	77591600	77594850	1	chr11_77591600	Cryba1	0	77592225	77592375	77592262	25	140	21.8
11	78608125	78608500	1	chr11_78608125	1810012P15Rik	0	78608425	78608450	78608437	15	15	2.5
11	78954925	78955900	1	chr11_78954925	Ksr1	0	78955000	78955175	78955137	16	100	15.6
11	79242025	79243000	1	chr11_79242025	Omg	0	79241925	79242100	79242037	22	129	13.3
11	79796775	79798300	1	chr11_79796775	Suz12	0	79796750	79797175	79796912	76	789	40.2
11	80857650	80858275	1	chr11_80857650	Accn1	0	80857925	80858150	80858037	25	197	17.7
11	80944825	80946725	1	chr11_80944825	Accn1	0	80945650	80945900	80945762	27	220	27.5
11	80975125	80975775	1	chr11_80975125	Accn1	0	80974975	80975175	80975037	18	122	13
11	81146925	81147725	1	chr11_81146925	Accn1	0	81147275	81147400	81147362	16	73	10.1
11	81432800	81433875	1	chr11_81432800	1700071K01Rik	0	81432600	81432950	81432787	61	564	25.6
11	81619525	81620200	1	chr11_81619525	Accn1	0	81619875	81620000	81619912	18	78	8.1
11	81648650	81649650	1	chr11_81648650	Accn1	0	81648550	81648925	81648737	72	663	43.3
11	81713550	81714475	1	chr11_81713550	Accn1	0	81714100	81714125	81714112	16	16	2.9
11	82478050	82479625	1	chr11_82478050	Cct6b	0	82478300	82478500	82478437	29	175	29.6
11	82506550	82506725	1	chr11_82506550	Cct6b	0	82506725	82506875	82506787	18	96	14.1
11	83311675	83312675	1	chr11_83311675	Taf15	0	83311675	83312100	83311887	118	1133	58.8
11	83681175	83682750	1	chr11_83681175	Tcf2	0	83681550	83681750	83681637	19	131	22.2
11	86225325	86227350	1	chr11_86225325	Thrap1	0	86225900	86226100	86225962	29	201	27.8
11	86517050	86517975	1	chr11_86517050	Ptrh2	0	86517350	86517725	86517537	42	434	48.5
11	88574300	88575375	1	chr11_88574300	Msi2	0	88574650	88574775	88574687	14	66	11.6
11	88783650	88787175	1	chr11_88783650	Coil	0	88784600	88784825	88784712	92	696	97.6
11	89058000	89058500	1	chr11_89058000	Nog	0	89058300	89058500	89058387	21	141	20.7
11	89395400	89396225	1	chr11_89395400	Ankfn1	0	89395300	89395550	89395412	28	223	19.1
11	89925125	89926100	1	chr11_89925125	Tmem100	0	89925800	89926175	89926012	37	398	40.1
11	95930200	95931475	1	chr11_95930200	Calcoco2	0	95930150	95930425	95930287	32	258	19.6
11	96006550	96007475	1	chr11_96006550	Hoxb13	0	96006250	96006950	96006437	61	860	83.5
11	96548700	96550050	1	chr11_96548700	Snx11	0	96548850	96549075	96548937	32	232	26.7
11	101122900	101124525	1	chr11_101122900	Becn1	0	101123850	101124100	101123987	50	398	22.5
11	101299775	101300600	1	chr11_101299775	Rnd2	0	101300050	101300075	101300062	14	14	2.8
11	103644775	103648025	1	chr11_103644775	Wnt3	0	103645100	103645175	103645112	19	56	10.5
11	103680275	103681425	1	chr11_103680275	Nsf	0	103680575	103680775	103680712	24	161	17.3
11	103751100	103752900	1	chr11_103751100	Nsf	0	103751925	103752150	103752087	22	159	10.5
11	104416925	104418125	1	chr11_104416925	Itgb3	0	104416725	104417125	104416937	120	1144	56.4
11	108084600	108086500	1	chr11_108084600	Prkca	0	108085175	108085400	108085237	25	194	21.6
11	108411400	108412025	1	chr11_108411400	Ccdc46	0	108411375	108411450	108411412	15	44	6.8
11	108925875	108927175	1	chr11_108925875	E030025P04Rik	0	108925950	108926250	108926087	36	340	32.5
11	110597325	110598700	1	chr11_110597325	Kcnj16	0	110597775	110598100	110597937	110	928	65.1
11	110858675	110859900	1	chr11_110858675	Kcnj2	0	110859375	110859875	110859562	53	605	54.3
11	112616750	112618050	1	chr11_112616750	Sox9	0	112617600	112617850	112617712	33	256	23
11	112686075	112688275	1	chr11_112686075	Sox9	0	112686725	112687125	112686912	41	467	24.7
11	112774900	112776850	1	chr11_112774900	Sox9	0	112775650	112775975	112775837	65	573	51.5
11	113199050	113199850	1	chr11_113199050	Slc39a11	0	113198925	113199125	113198962	20	122	16.5
11	115067025	115067700	1	chr11_115067025	Grin2c	0	115066875	115067125	115066987	31	247	33.7
11	115595025	115596950	1	chr11_115595025	2310067B10Rik	0	115595400	115595475	115595412	13	38	5.3
11	117219975	117220800	1	chr11_117219975	2012-09-09	0	117220000	117220125	117220037	17	79	11.5
11	117480650	117482750	1	chr11_117480650	Tnrc6c	0	117481325	117481525	117481437	22	152	13.1
11	118270525	118272325	1	chr11_118270525	C1qtnf1	0	118271100	118271375	118271287	41	353	38.5
11	118278600	118279975	1	chr11_118278600	D230014K01Rik	0	118279325	118279375	118279362	14	27	4.6
11	119220275	119220500	1	chr11_119220275	Slc26a11	0	119220225	119220350	119220237	15	68	13.1
11	119459175	119462400	1	chr11_119459175	4932417H02Rik	0	119461225	119461450	119461312	45	336	32.4
11	119487850	119489625	1	chr11_119487850	4932417H02Rik	0	119488225	119488450	119488287	23	181	16.9
11	120083925	120087200	1	chr11_120083925	Bahcc1	0	120085900	120086150	120086037	28	206	20.1
11	120479175	120482125	1	chr11_120479175	5730593N15Rik	0	120479700	120480150	120479962	69	844	60.2
10	4180950	4182025	1	chr10_4180950	Rgs17	0	4181950	4182125	4181962	18	112	8
10	6616500	6616550	1	chr10_6616500	Plekhg1	0	6616550	6616800	6616687	23	183	23.9
10	6771750	6772550	1	chr10_6771750	Iyd	0	6771825	6771975	6771912	20	105	11.5
10	7336250	7337475	1	chr10_7336250	Pcmt1	0	7336075	7336350	7336237	25	198	23.3
10	9315050	9316475	1	chr10_9315050	E130306M17Rik	0	9315625	9315900	9315762	36	296	27.4
10	10918700	10920950	1	chr10_10918700	Fbxo30	0	10919725	10919950	10919812	27	199	26.4
10	11436850	11438375	1	chr10_11436850	Epm2a	0	11437400	11437425	11437412	13	13	2.1
10	12231125	12234250	1	chr10_12231125	Utrn	0	12233800	12233975	12233812	16	102	14.7
10	12260550	12263250	1	chr10_12260550	Utrn	0	12262900	12263275	12263087	51	491	52.2
10	12416225	12417400	1	chr10_12416225	Utrn	0	12416200	12416450	12416312	25	207	28.1
10	12619350	12621725	1	chr10_12619350	Utrn	0	12620675	12620800	12620687	16	77	5
10	12797075	12799325	1	chr10_12797075	Plagl1	0	12798150	12798525	12798362	42	451	51
10	16866700	16867600	1	chr10_16866700	Cited2	0	16867325	16867625	16867437	43	372	29.9
10	17497150	17498150	1	chr10_17497150	Txlnb	0	17498000	17498350	17498187	35	351	33.5
10	18168075	18169175	1	chr10_18168075	Hebp2	0	18168900	18168950	18168912	15	30	5.3
10	18170650	18172425	1	chr10_18170650	Hebp2	0	18172050	18172225	18172137	21	119	17.5
10	18559875	18561100	1	chr10_18559875	Perp	0	18560425	18560550	18560487	18	82	8.7
10	19093150	19094100	1	chr10_19093150	Olig3	0	19093700	19094075	19093912	54	508	39.2
10	19847150	19849050	1	chr10_19847150	Mtap7	0	19847575	19847600	19847587	13	13	2.5
10	19975375	19976175	1	chr10_19975375	Bclaf1	0	19975575	19975825	19975687	36	281	33.2
10	19987700	19988425	1	chr10_19987700	Bclaf1	0	19988100	19988275	19988162	17	104	18.3
10	20777025	20778525	1	chr10_20777025	Myb	0	20777300	20777425	20777312	15	66	12.6
10	21390450	21391800	1	chr10_21390450	Sgk	0	21391025	21391500	21391262	94	1075	53.6
10	23493825	23497175	1	chr10_23493825	1110021L09Rik	0	23495550	23495875	23495712	49	431	35.3
10	23667450	23668500	1	chr10_23667450	Taar6	0	23667475	23667675	23667537	20	144	23.7
10	24247975	24248625	1	chr10_24247975	Ctgf	0	24247900	24248075	24247962	17	101	17.6
10	24514625	24516125	1	chr10_24514625	Enpp3	0	24515650	24515875	24515737	36	283	36.9
10	24712950	24714400	1	chr10_24712950	Arg1	0	24713450	24713650	24713462	17	131	13.7
10	24718425	24719300	1	chr10_24718425	Arg1	0	24718750	24719200	24718962	179	1726	69.8
10	24895650	24898500	1	chr10_24895650	Akap7	0	24897400	24897550	24897437	24	134	22.3
10	25001050	25005100	1	chr10_25001050	Akap7	0	25003525	25003725	25003637	47	311	44
10	25648050	25649050	1	chr10_25648050	C030003D03Rik	0	25648900	25649025	25648987	18	82	15.4
10	26017150	26017775	1	chr10_26017150	L3mbtl3	0	26017275	26017575	26017412	38	321	32.8
10	26298500	26298525	1	chr10_26298500	Arhgap18	0	26298525	26298725	26298637	21	141	10.5
10	27920875	27922300	1	chr10_27920875	Ptprk	0	27921775	27922000	27921912	28	214	28.2
10	31145975	31147400	1	chr10_31145975	Tpd52l1	0	31146175	31146500	31146362	33	316	34.2
10	33936600	33937800	1	chr10_33936600	Tspyl1	0	33936900	33937100	33936962	34	233	32
10	34136275	34137175	1	chr10_34136275	Nt5dc1	0	34136350	34136700	34136537	56	550	31
10	36312275	36313275	1	chr10_36312275	Hs3st5	0	36312450	36312775	36312612	48	418	31.6
10	36625575	36627225	1	chr10_36625575	Hdac2	0	36625400	36625625	36625487	23	180	18
10	38795275	38796350	1	chr10_38795275	1700025K23Rik	0	38796300	38796625	38796462	46	391	40.2
10	39361725	39364950	1	chr10_39361725	Rev3l	0	39364325	39364575	39364462	39	309	32.3
10	41314850	41316475	1	chr10_41314850	5033413D22Rik	0	41315525	41315725	41315637	24	167	24
10	41518100	41519425	1	chr10_41518100	2410017P07Rik	0	41518550	41518725	41518612	19	114	17.7
10	42334325	42335625	1	chr10_42334325	Ostm1	0	42334925	42335050	42334987	19	83	7.3
10	42632700	42634975	1	chr10_42632700	Scml4	0	42633950	42634150	42634012	27	164	23.5
10	42655725	42659475	1	chr10_42655725	Scml4	0	42656675	42657100	42656837	78	834	52.2
10	43680875	43682300	1	chr10_43680875	Aim1	0	43681750	43682050	43681862	55	491	32.4
10	44122725	44123850	1	chr10_44122725	Prdm1	0	44123300	44123500	44123387	29	188	25
10	44208850	44209775	1	chr10_44208850	Prdm1	0	44208625	44208975	44208812	81	705	25.6
10	44403175	44405925	1	chr10_44403175	Prdm1	0	44405025	44405325	44405162	51	440	28.2
10	44809850	44811250	1	chr10_44809850	Prep	0	44810100	44810400	44810262	33	295	22.2
10	46422100	46422525	1	chr10_46422100	Hace1	0	46422200	46422550	46422362	86	769	40.2
10	47206050	47206625	1	chr10_47206050	Hace1	0	47206275	47206625	47206437	57	524	17.6
10	51303700	51304400	1	chr10_51303700	Gprc6a	0	51303725	51303775	51303737	13	26	3.8
10	57165625	57166250	1	chr10_57165625	Hsf2	0	57165850	57165925	57165862	17	49	9.5
10	57264850	57265375	1	chr10_57264850	Serinc1	0	57265175	57265400	57265262	28	197	9.4
10	58748525	58749650	1	chr10_58748525	P4ha1	0	58749425	58749775	58749612	84	754	38.5
10	59785675	59786675	1	chr10_59785675	4632428N05Rik	0	59786000	59786225	59786112	26	177	20.8
10	60001325	60003275	1	chr10_60001325	Cdh23	0	60002475	60002700	60002562	20	157	14.5
10	60469725	60470650	1	chr10_60469725	Pcbd1	0	60470225	60470375	60470237	18	97	17.2
10	61394650	61396200	1	chr10_61394650	Col13a1	0	61395275	61395300	61395287	19	19	3.8
10	61530700	61533700	1	chr10_61530700	Neurog3	0	61532600	61532850	61532712	27	220	23.9
10	61870325	61873650	1	chr10_61870325	Vps26a	0	61872350	61872650	61872487	35	322	32
10	61908475	61909800	1	chr10_61908475	Prg1	0	61909725	61909950	61909787	24	184	22.8
10	62484575	62486025	1	chr10_62484575	Atoh7	0	62484825	62485100	62484962	40	337	37
10	62756175	62757250	1	chr10_62756175	Sirt1	0	62755875	62756175	62756037	33	273	36.4
10	66292100	66293650	1	chr10_66292100	Reep3	0	66292950	66293050	66292962	17	61	12.1
10	66856950	66858100	1	chr10_66856950	Egr2	0	66857275	66857525	66857437	25	187	23.3
10	67654500	67655850	1	chr10_67654500	Arid5b	0	67655100	67655350	67655187	26	196	12.1
10	68190200	68191225	1	chr10_68190200	Tmem26	0	68190725	68190900	68190787	15	99	14.2
10	69302475	69306275	1	chr10_69302475	Ank3	0	69303975	69304200	69304112	31	218	26.7
10	69655850	69656575	1	chr10_69655850	Slc16a9	0	69655975	69656500	69656112	29	362	43.7
10	69686750	69688125	1	chr10_69686750	Slc16a9	0	69687675	69687825	69687812	16	83	11.3
10	69828975	69829025	1	chr10_69828975	1200015N20Rik	0	69828575	69828975	69828712	26	331	45.2
10	70104075	70105275	1	chr10_70104075	Phyhipl	0	70104175	70104400	70104312	28	202	26.5
10	70267100	70267325	1	chr10_70267100	Phyhipl	0	70267200	70267525	70267362	38	338	28.2
10	70618275	70619025	1	chr10_70618275	Tfam	0	70618500	70618600	70618562	17	62	10.1
10	75511650	75512400	1	chr10_75511650	Zfp280b	0	75511375	75511750	75511562	97	914	40.4
10	77794550	77795650	1	chr10_77794550	Nnp1	0	77794250	77794550	77794412	63	555	54.6
10	79448350	79453950	1	chr10_79448350	Gpx4	0	79449000	79449275	79449112	42	347	42.9
10	83449650	83450575	1	chr10_83449650	Appl2	0	83450200	83450225	83450212	14	14	2.7
10	84136850	84138050	1	chr10_84136850	Rfx4	0	84137675	84138225	84138037	84	870	64.5
10	84267675	84271025	1	chr10_84267675	Ric8b	0	84268900	84269250	84269087	64	570	46.9
10	84880400	84881925	1	chr10_84880400	Btbd11	0	84881400	84881825	84881637	86	893	48.3
10	84902525	84905875	1	chr10_84902525	Btbd11	0	84903100	84903150	84903112	14	28	5
10	85767250	85770375	1	chr10_85767250	Timp3	0	85767825	85768175	85767987	47	455	35.1
10	85863950	85866325	1	chr10_85863950	Syn3	0	85864875	85865025	85864912	20	100	14.5
10	86213175	86216950	1	chr10_86213175	C630002B14Rik	0	86214975	86215200	86215062	20	155	17.3
10	87592350	87593400	1	chr10_87592350	Nup37	0	87592550	87592725	87592662	20	125	23.6
10	87778875	87779925	1	chr10_87778875	1200002N14Rik	0	87779700	87780000	87779812	45	400	36.4
10	88864500	88865100	1	chr10_88864500	Gas2l3	0	88864625	88864750	88864737	19	85	12.8
10	92246400	92247950	1	chr10_92246400	Nedd1	0	92246900	92247025	92246937	18	82	13.8
10	92671175	92672150	1	chr10_92671175	Elk3	0	92671975	92672350	92672187	72	729	78.8
10	92848575	92850075	1	chr10_92848575	Lta4h	0	92849425	92849675	92849587	38	292	35.3
10	93049850	93051100	1	chr10_93049850	Ntn4	0	93050600	93050775	93050762	21	122	20.8
10	93523175	93525050	1	chr10_93523175	Fgd6	0	93523375	93523700	93523512	43	387	42.2
10	93851600	93852075	1	chr10_93851600	Tmcc3	0	93851775	93851950	93851862	16	102	11.9
10	94782475	94784075	1	chr10_94782475	Cradd	0	94783850	94784075	94783987	30	230	39.2
10	95072475	95074000	1	chr10_95072475	Nudt4	0	95072675	95072975	95072837	37	319	40.5
10	95313275	95314625	1	chr10_95313275	Eea1	0	95313375	95313575	95313437	26	180	27.8
10	95320275	95322050	1	chr10_95320275	Eea1	0	95321950	95322300	95322112	93	837	55
10	95343625	95344125	1	chr10_95343625	Eea1	0	95343600	95343850	95343712	33	240	31.6
10	95536325	95537725	1	chr10_95536325	Eea1	0	95537100	95537400	95537237	37	340	39.4
10	95714700	95715875	1	chr10_95714700	Btg1	0	95715250	95715625	95715312	23	274	47.3
10	95738500	95739175	1	chr10_95738500	Btg1	0	95738775	95739025	95738887	38	274	35.5
10	95909050	95909175	1	chr10_95909050	Btg1	0	95909175	95909225	95909187	14	27	4
10	98898650	98900000	1	chr10_98898650	Dusp6	0	98898700	98899075	98898887	64	611	37.4
10	99495800	99495825	1	chr10_99495800	Kitl	0	99495775	99496050	99495912	51	431	37.8
10	99593150	99595325	1	chr10_99593150	Kitl	0	99594175	99594625	99594362	61	724	54.9
10	107971875	107972925	1	chr10_107971875	C6.1AL	0	107972450	107972650	107972487	22	142	22.8
10	110381250	110381925	1	chr10_110381250	Zdhhc17	0	110381525	110381725	110381612	24	167	26.4
10	110521300	110522075	1	chr10_110521300	Osbpl8	0	110521250	110521525	110521387	66	526	59.4
10	110837550	110838950	1	chr10_110837550	Nap1l1	0	110837525	110837775	110837637	40	302	22.1
10	111257200	111258500	1	chr10_111257200	Krr1	0	111258375	111258750	111258562	64	618	52
10	111271675	111271775	1	chr10_111271675	Krr1	0	111271675	111272075	111271837	32	371	51.5
10	111804625	111805050	1	chr10_111804625	Kcnc2	0	111804600	111804800	111804662	26	185	21.2
10	115826675	115826950	1	chr10_115826675	Kcnmb4	0	115826750	115826975	115826862	23	167	24.9
10	115916150	115918650	1	chr10_115916150	Kcnmb4	0	115916725	115916950	115916862	29	218	33
10	117523600	117525800	1	chr10_117523600	Mdm1	0	117525025	117525200	117525062	20	123	19.7
10	117864050	117865300	1	chr10_117864050	Ifng	0	117864100	117864400	117864212	61	548	57.8
10	118937350	118938825	1	chr10_118937350	Grip1	0	118937975	118938025	118937987	13	26	4.3
10	119233800	119234325	1	chr10_119233800	Grip1	0	119233600	119233925	119233762	55	473	49.4
10	119428175	119428750	1	chr10_119428175	Helb	0	119428225	119428350	119428262	16	73	7.5
10	121288875	121288975	1	chr10_121288875	BC048403	0	121288850	121288925	121288887	15	42	7.7
10	124617700	124617800	1	chr10_124617700	Slc16a7	0	124617750	124617875	124617862	18	82	10.5
10	125203525	125204525	1	chr10_125203525	Lrig3	0	125203525	125203975	125203737	37	489	25.6
10	125241700	125243200	1	chr10_125241700	Lrig3	0	125242650	125242800	125242737	29	152	26.5
10	126167100	126167225	1	chr10_126167100	Xrcc6bp1	0	126166975	126167350	126167162	25	272	35.3
10	126640400	126642450	1	chr10_126640400	Kif5a	0	126641250	126641475	126641337	39	295	33.2
10	128088225	128090925	1	chr10_128088225	Rab5b	0	128088625	128088775	128088712	20	101	14.5
13	5898625	5900175	1	chr13_5898625	Klf6	0	5898900	5899250	5899062	61	558	26.3
13	5979450	5979500	1	chr13_5979450	Klf6	0	5979350	5979625	5979462	40	327	20.9
13	9140625	9142500	1	chr13_9140625	Larp5	0	9141700	9141950	9141837	26	214	22.8
13	9629800	9630800	1	chr13_9629800	Zmynd11	0	9629800	9629950	9629812	13	78	8.5
13	11966400	11967050	1	chr13_11966400	Ryr2	0	11966250	11966450	11966362	28	172	26.4
13	11970600	11970750	1	chr13_11970600	Ryr2	0	11970475	11970725	11970637	28	220	12.4
13	12032550	12033975	1	chr13_12032550	Ryr2	0	12033025	12033325	12033162	33	288	24.2
13	13462625	13464975	1	chr13_13462625	Lyst	0	13463800	13464175	13463987	21	243	18.7
13	13961675	13962675	1	chr13_13961675	Arid4b	0	13962300	13962500	13962362	17	131	12.6
13	14218575	14219925	1	chr13_14218575	Hecw1	0	14219025	14219775	14219587	44	829	87.4
13	14231950	14232350	1	chr13_14231950	Hecw1	0	14231700	14232000	14231887	32	298	36.3
13	17485600	17488350	1	chr13_17485600	2810021B07Rik	0	17485325	17485800	17485612	44	499	43.3
13	17628000	17629425	1	chr13_17628000	Cdc2l5	0	17629275	17629500	17629337	27	192	17.9
13	18583200	18583425	1	chr13_18583200	Vps41	0	18583025	18583400	18583212	79	744	46.9
13	19432000	19432375	1	chr13_19432000	Stard3nl	0	19432075	19432275	19432112	22	165	18
13	20045925	20050325	1	chr13_20045925	Elmo1	0	20048600	20048925	20048787	34	322	43.3
13	20131150	20131750	1	chr13_20131150	Elmo1	0	20131550	20131750	20131662	27	176	16.5
13	20943325	20943800	1	chr13_20943325	Olfr1370	0	20943525	20943850	20943687	52	483	50.1
13	21931625	21932525	1	chr13_21931625	Zfp184	0	21932450	21932500	21932462	16	32	5.9
13	23499800	23501375	1	chr13_23499800	Btn2a2	0	23499400	23499800	23499587	92	888	57
13	24002050	24003950	1	chr13_24002050	Scgn	0	24003075	24003250	24003187	28	154	21.4
13	24909225	24909750	1	chr13_24909225	Aldh5a1	0	24909550	24909650	24909587	19	68	11.6
13	28816400	28818800	1	chr13_28816400	Sox4	0	28818225	28818350	28818262	19	94	15.9
13	29378450	29379325	1	chr13_29378450	Sox4	0	29378350	29378725	29378537	67	611	42.2
13	30072650	30074500	1	chr13_30072650	Mboat1	0	30073050	30073375	30073212	46	420	32.1
13	30966675	30968225	1	chr13_30966675	Hus1b	0	30967200	30967400	30967287	30	205	24.4
13	31922525	31923925	1	chr13_31922525	Foxc1	0	31923300	31923400	31923337	16	56	9.2
13	35775150	35780250	1	chr13_35775150	Cdyl	0	35777425	35777450	35777437	16	16	2.9
13	36303875	36306250	1	chr13_36303875	Fars2	0	36305100	36305225	36305162	16	73	11.5
13	37432300	37433775	1	chr13_37432300	Ly86	0	37432900	37433150	37432987	33	272	21.6
13	37781000	37781875	1	chr13_37781000	Rreb1	0	37780850	37781250	37781062	91	898	57.8
13	38162750	38163800	1	chr13_38162750	6530403A03Rik	0	38163025	38163100	38163062	16	45	8.5
13	40533225	40535550	1	chr13_40533225	Tcfap2a	0	40533975	40534375	40534162	54	590	30.9
13	40723675	40725475	1	chr13_40723675	Tcfap2a	0	40725450	40725850	40725612	26	315	39.2
13	41005225	41006450	1	chr13_41005225	Pak1ip1	0	41006025	41006100	41006037	18	54	10.6
13	41469175	41470675	1	chr13_41469175	Nedd9	0	41469675	41469800	41469687	14	65	9.2
13	43595625	43597025	1	chr13_43595625	Ccdc90a	0	43596300	43596575	43596437	33	280	27.4
13	44238875	44239850	1	chr13_44238875	Cd83	0	44239650	44239875	44239737	25	175	23.6
13	44418825	44420200	1	chr13_44418825	Jarid2	0	44419300	44419500	44419437	20	134	16.8
13	44564900	44567775	1	chr13_44564900	Jarid2	0	44565700	44565900	44565812	26	181	21.8
13	44591475	44596025	1	chr13_44591475	Jarid2	0	44595225	44595350	44595262	22	100	14.1
13	44821450	44826650	1	chr13_44821450	Jarid2	0	44823350	44823550	44823512	20	132	14.2
13	44860375	44863775	1	chr13_44860375	Jarid2	0	44862375	44862800	44862587	78	830	44.3
13	45342925	45343275	1	chr13_45342925	Mylip	0	45342800	45343000	45342912	23	156	19.3
13	45385175	45386025	1	chr13_45385175	Mylip	0	45385750	45386100	45385937	46	437	35.8
13	45997225	45998025	1	chr13_45997225	Atxn1	0	45997450	45997625	45997462	15	96	13.8
13	46293425	46294400	1	chr13_46293425	Gm1574	0	46293525	46293800	46293687	29	252	32
13	46655350	46657650	1	chr13_46655350	C78339	0	46656475	46656800	46656612	60	540	30.2
13	46705700	46710200	1	chr13_46705700	C78339	0	46706100	46706275	46706212	21	125	17.2
13	47284000	47284625	1	chr13_47284000	Ibrdc2	0	47284475	47284675	47284587	38	248	33.7
13	48141300	48144350	1	chr13_48141300	Id4	0	48142550	48142925	48142737	86	764	40.1
13	48539925	48540700	1	chr13_48539925	mmu-let-7d	0	48540325	48540575	48540487	38	287	41.6
13	51216000	51216100	1	chr13_51216000	Nxnl2	0	51216025	51216275	51216137	28	221	24.7
13	52323475	52324175	1	chr13_52323475	Diras2	0	52323600	52323700	52323637	15	58	10.6
13	52824250	52826500	1	chr13_52824250	Auh	0	52825150	52825300	52825237	15	84	15.5
13	53233300	53234325	1	chr13_53233300	Ror2	0	53233500	53233525	53233512	13	13	2
13	53238025	53244400	1	chr13_53238025	Ror2	0	53242300	53242675	53242437	57	617	60.6
13	54077200	54078525	1	chr13_54077200	Sfxn1	0	54077300	54077600	54077437	54	452	46.5
13	54127175	54129050	1	chr13_54127175	Sfxn1	0	54128000	54128375	54128187	115	1033	39.2
13	55214350	55215400	1	chr13_55214350	Nsd1	0	55215050	55215200	55215137	23	123	19.4
13	56245025	56246850	1	chr13_56245025	Neurog1	0	56245900	56246075	56246012	20	123	19.7
13	57334075	57336225	1	chr13_57334075	Trpc7	0	57335100	57335300	57335262	21	140	22.1
13	57371100	57373625	1	chr13_57371100	Trpc7	0	57372125	57372550	57372362	170	1581	54.9
13	58981100	58981600	1	chr13_58981100	Ntrk2	0	58981600	58981650	58981637	15	29	5.2
13	62340650	62341750	1	chr13_62340650	8430426H19Rik	0	62341100	62341325	62341212	23	161	11.9
13	62889300	62890075	1	chr13_62889300	Fbp1	0	62889525	62889650	62889562	19	83	16.3
13	64436375	64437925	1	chr13_64436375	Ccrk	0	64436600	64436625	64436612	13	13	2.5
13	67313925	67314775	1	chr13_67313925	Uqcrb	0	67314000	67314200	67314137	19	122	14.4
13	70052750	70054050	1	chr13_70052750	Srd5a1	0	70053775	70053900	70053887	18	81	14.2
13	70170000	70170975	1	chr13_70170000	Nsun2	0	70170975	70171200	70171037	28	226	35.5
13	71924975	71925800	1	chr13_71924975	mmu-mir-466f-4	0	71924750	71925000	71924837	27	214	30.3
13	76168875	76169825	1	chr13_76168875	Ell2	0	76168800	76169150	76168962	59	536	48.5
13	85256375	85256925	1	chr13_85256375	Ccnh	0	85256750	85256950	85256837	22	141	18.2
13	90134725	90136025	1	chr13_90134725	Cspg2	0	90135750	90136250	90136062	88	936	60.9
13	91911775	91912450	1	chr13_91911775	Ssbp2	0	91911675	91911825	91911737	17	93	9.6
13	93803700	93804500	1	chr13_93803700	Thbs4	0	93804200	93804575	93804337	41	427	49.6
13	95767350	95770725	1	chr13_95767350	Tbca	0	95770350	95770375	95770362	13	13	2.1
13	96932700	96934475	1	chr13_96932700	Iqgap2	0	96933450	96933725	96933612	20	173	22.5
13	97289275	97289575	1	chr13_97289275	1200014M14Rik	0	97289225	97289400	97289362	18	108	17.9
13	97760850	97761875	1	chr13_97760850	Hmgcr	0	97760900	97761175	97761012	40	330	30.7
13	97773875	97777300	1	chr13_97773875	Hmgcr	0	97774600	97774950	97774762	36	360	34.1
13	98007400	98007700	1	chr13_98007400	1700029F12Rik	0	98007700	98007950	98007812	24	190	18.9
13	98196900	98198675	1	chr13_98196900	5730427N09Rik	0	98197950	98198200	98198087	35	292	41.6
13	98338350	98338500	1	chr13_98338350	Enc1	0	98338500	98338575	98338537	15	42	7.3
13	98554925	98556500	1	chr13_98554925	Enc1	0	98555050	98555200	98555087	23	117	17.7
13	99059575	99060400	1	chr13_99059575	Rgnef	0	99059600	99059675	99059637	16	45	8.2
13	99458225	99459275	1	chr13_99458225	Foxd1	0	99458725	99459000	99458862	36	298	33.8
13	100881300	100881925	1	chr13_100881300	Cartpt	0	100881525	100881700	100881587	19	116	18.7
13	101635925	101636650	1	chr13_101635925	Ocln	0	101636125	101636225	101636212	14	52	8.8
13	102337025	102338350	1	chr13_102337025	Slc30a5	0	102337775	102337850	102337812	14	40	6.4
13	103700150	103700975	1	chr13_103700150	Cd180	0	103700350	103700600	103700437	28	223	26
13	103959700	103960825	1	chr13_103959700	Cd180	0	103960675	103960700	103960687	14	14	2.8
13	104014075	104017700	1	chr13_104014075	Cd180	0	104016375	104016975	104016487	35	487	54.7
13	104035300	104035375	1	chr13_104035300	Cd180	0	104035375	104035775	104035637	31	340	40.9
13	104788200	104789125	1	chr13_104788200	Sfrs12	0	104788300	104788375	104788362	14	39	7.8
13	107976025	107977925	1	chr13_107976025	Ipo11	0	107976925	107977225	107977062	53	463	33.1
13	108254350	108255025	1	chr13_108254350	Kif2a	0	108254375	108254650	108254512	31	268	27.4
13	109339450	109341300	1	chr13_109339450	Elovl7	0	109340025	109340100	109340037	14	41	6.7
13	110959775	110962000	1	chr13_110959775	Rab3c	0	110961175	110961400	110961262	22	168	15.8
13	111037925	111040200	1	chr13_111037925	Rab3c	0	111039525	111039725	111039637	22	136	18.9
13	112494600	112495000	1	chr13_112494600	Gpbp1	0	112494650	112494975	112494787	37	358	41.2
13	113884175	113885850	1	chr13_113884175	Ppap2a	0	113885650	113885750	113885662	14	55	9.2
13	114882950	114884550	1	chr13_114882950	Arl15	0	114883625	114883650	114883637	15	15	2.9
13	115278500	115279725	1	chr13_115278500	Ndufs4	0	115279075	115279325	115279212	54	400	45.2
13	115412050	115414750	1	chr13_115412050	Ndufs4	0	115414325	115414500	115414412	17	107	8.4
13	115423650	115426275	1	chr13_115423650	Ndufs4	0	115424450	115424625	115424462	17	117	22.6
13	115526950	115528575	1	chr13_115526950	Ndufs4	0	115527325	115528125	115527487	57	920	97.9
13	118364700	118366025	1	chr13_118364700	Emb	0	118364800	118365000	118364937	20	126	14.5
13	119378075	119379075	1	chr13_119378075	Mrps30	0	119378925	119379175	119379037	34	270	37
12	4004150	4005150	1	chr12_4004150	C030014M07Rik	0	4004975	4005025	4005012	15	29	5.7
12	4099050	4099850	1	chr12_4099050	C330021A05Rik	0	4099350	4099675	4099487	42	363	27.8
12	5092800	5094575	1	chr12_5092800	Atad2b	0	5093750	5093975	5093812	26	188	15.5
12	9158400	9159125	1	chr12_9158400	Ttc32	0	9158750	9158825	9158762	14	40	4.6
12	12606600	12607400	1	chr12_12606600	D12Ertd553e	0	12606925	12607100	12607012	20	121	16.2
12	12934500	12937300	1	chr12_12934500	Mycn	0	12935875	12935925	12935912	19	36	6.7
12	13008675	13009175	1	chr12_13008675	Mycn	0	13009125	13009250	13009137	15	74	11.9
12	16502000	16503500	1	chr12_16502000	Lpin1	0	16503075	16503100	16503087	13	13	1.4
12	17733525	17736325	1	chr12_17733525	Hpcal1	0	17734875	17735075	17734937	23	157	15.6
12	25584250	25585100	1	chr12_25584250	C330002I19Rik	0	25584675	25584925	25584762	20	168	26
12	26482225	26483325	1	chr12_26482225	Rnf144	0	26482850	26483125	26482987	29	226	14.4
12	27650575	27651525	1	chr12_27650575	Sox11	0	27651300	27651600	27651412	34	301	28.1
12	27663075	27664175	1	chr12_27663075	Sox11	0	27663725	27663925	27663837	24	159	10.6
12	27740475	27741725	1	chr12_27740475	Sox11	0	27740725	27740875	27740787	18	93	14.7
12	27898300	27898350	1	chr12_27898300	Sox11	0	27898175	27898375	27898237	16	121	21.8
12	27905950	27908425	1	chr12_27905950	Sox11	0	27906975	27907325	27907137	47	448	44.3
12	28560250	28561200	1	chr12_28560250	Allc	0	28560800	28560975	28560862	19	123	12.4
12	31678050	31679725	1	chr12_31678050	9030611O19Rik	0	31678775	31678825	31678787	15	28	5
12	32193575	32193650	1	chr12_32193575	Bcap29	0	32193450	32193700	32193537	50	402	47.9
12	33508800	33510300	1	chr12_33508800	Sypl	0	33509600	33509625	33509612	14	14	2.5
12	33805525	33806575	1	chr12_33805525	Atxn7l4	0	33805800	33805825	33805812	13	13	2.5
12	33965675	33965700	1	chr12_33965675	Twistnb	0	33965575	33965675	33965612	17	64	8.7
12	34805525	34806475	1	chr12_34805525	Twist1	0	34805300	34805675	34805462	39	411	34.6
12	40178275	40178375	1	chr12_40178275	Arl4a	0	40178125	40178400	40178262	40	312	20.8
12	41492700	41495225	1	chr12_41492700	Immp2l	0	41495200	41495500	41495362	39	343	50
12	41563525	41564800	1	chr12_41563525	Immp2l	0	41563450	41563675	41563587	29	219	19
12	42069550	42071050	1	chr12_42069550	Lrrn3	0	42069625	42069925	42069787	52	452	36.9
12	42596600	42599800	1	chr12_42596600	Lrrn3	0	42597550	42597925	42597737	117	1039	60.5
12	42600025	42602475	1	chr12_42600025	Lrrn3	0	42600050	42600425	42600212	79	725	52.8
12	43394800	43395300	1	chr12_43394800	Lrrn3	0	43395200	43395500	43395337	79	633	21.6
12	44789975	44791225	1	chr12_44789975	Dnajb9	0	44790525	44791000	44790862	38	414	40.2
12	45405625	45407150	1	chr12_45405625	Nrcam	0	45406000	45406325	45406187	27	277	33.8
12	46484375	46485125	1	chr12_46484375	Stxbp6	0	46484975	46485425	46485212	46	566	34.9
12	46490325	46492225	1	chr12_46490325	Stxbp6	0	46490375	46490625	46490462	32	254	9.6
12	52641225	52642125	1	chr12_52641225	Strn3	0	52642125	52642325	52642212	19	131	16.9
12	53197425	53198325	1	chr12_53197425	Nubpl	0	53198125	53198275	53198237	17	92	10.6
12	54966950	54969125	1	chr12_54966950	Egln3	0	54968600	54968950	54968812	35	371	39.7
12	55144775	55146725	1	chr12_55144775	Egln3	0	55146700	55147025	55146862	27	265	24.4
12	56401175	56402950	1	chr12_56401175	Nfkbia	0	56402575	56402775	56402612	22	151	23.5
12	57213325	57217725	1	chr12_57213325	Mbip	0	57216375	57216900	57216662	98	1058	60.5
12	60423575	60425275	1	chr12_60423575	Fbxo33	0	60424150	60424225	60424187	15	43	7.4
12	70746375	70747700	1	chr12_70746375	Cdkl1	0	70746775	70747000	70746887	26	201	23
12	71468250	71468475	1	chr12_71468250	Txndc1	0	71468200	71468250	71468212	16	32	6
12	72215725	72218125	1	chr12_72215725	Dact1	0	72215375	72215750	72215587	134	1263	61.2
12	72266300	72268425	1	chr12_72266300	Dact1	0	72267100	72267375	72267212	22	203	32.1
12	72268750	72269225	1	chr12_72268750	Dact1	0	72268825	72269050	72268912	30	209	27.5
12	72367650	72368300	1	chr12_72367650	Dact1	0	72367750	72367850	72367812	16	61	11.2
12	72394300	72395050	1	chr12_72394300	Dact1	0	72394925	72395150	72395062	26	194	15.6
12	72443900	72445100	1	chr12_72443900	Dact1	0	72444525	72444575	72444537	15	29	5.4
12	73312125	73312850	1	chr12_73312125	Rtn1	0	73312300	73312500	73312412	26	176	25.8
12	73512750	73513925	1	chr12_73512750	1810048J11Rik	0	73512925	73513175	73513062	39	298	27.2
12	73771625	73772875	1	chr12_73771625	Six6os1	0	73772850	73773350	73773012	47	646	72.9
12	74638325	74640125	1	chr12_74638325	Prkch	0	74638700	74638925	74638812	28	197	18
12	76455275	76456775	1	chr12_76455275	Ppp2r5e	0	76455900	76456050	76455987	19	96	15.5
12	76762875	76763325	1	chr12_76762875	Syne2	0	76763200	76763450	76763337	36	296	38.1
12	78107450	78108475	1	chr12_78107450	Fut8	0	78108175	78108350	78108212	24	140	19.7
12	80543700	80546200	1	chr12_80543700	Rad51l1	0	80544475	80545000	80544837	62	671	68.6
12	80928375	80930900	1	chr12_80928375	Zfp36l1	0	80929075	80929425	80929237	139	1189	44.3
12	81756875	81758325	1	chr12_81756875	4933426M11Rik	0	81757650	81757950	81757812	45	396	31.7
12	82916375	82916650	1	chr12_82916375	Pcnx	0	82916500	82916725	82916587	30	205	26
12	85167075	85168000	1	chr12_85167075	Zadh1	0	85167725	85167900	85167812	20	116	17.3
12	87445775	87447375	1	chr12_87445775	Vash1	0	87446050	87446325	87446187	43	366	38.3
12	92012775	92013675	1	chr12_92012775	Gtf2a1	0	92013350	92013475	92013412	22	103	17.6
12	97800550	97802275	1	chr12_97800550	Galc	0	97801425	97801750	97801612	64	532	29.3
12	99631075	99632925	1	chr12_99631075	Ches1	0	99631175	99631425	99631312	30	234	26.5
12	99699500	99702650	1	chr12_99699500	Ches1	0	99700800	99701275	99701062	207	2031	60.5
12	99974125	99978975	1	chr12_99974125	Ches1	0	99977975	99978025	99978012	18	35	6.7
12	101037225	101038225	1	chr12_101037225	Rps6ka5	0	101037775	101038125	101037962	72	618	40.5
12	102263275	102264325	1	chr12_102263275	Fbln5	0	102263350	102263600	102263462	30	250	26.1
12	105280650	105283050	1	chr12_105280650	Clmn	0	105281850	105282125	105282012	40	334	29.9
12	105403375	105407825	1	chr12_105403375	4831426I19Rik	0	105403975	105404025	105403987	14	27	4.9
12	105487475	105489800	1	chr12_105487475	Glrx5	0	105488400	105488750	105488587	120	1008	25.7
12	105946125	105948750	1	chr12_105946125	Bdkrb2	0	105947075	105947225	105947087	23	122	22.6
12	106482525	106483525	1	chr12_106482525	Vrk1	0	106483450	106483475	106483462	13	13	1.7
12	106517450	106518500	1	chr12_106517450	Vrk1	0	106518250	106518550	106518362	22	213	27.5
12	108764400	108766475	1	chr12_108764400	1600002O04Rik	0	108765225	108765375	108765237	13	75	10.9
12	108890350	108892050	1	chr12_108890350	Eml1	0	108891200	108891350	108891212	19	102	13.5
12	108928725	108928900	1	chr12_108928725	Eml1	0	108928800	108928975	108928887	19	110	12.6
12	109051775	109053700	1	chr12_109051775	Evl	0	109052400	109052575	109052437	17	110	13.5
12	109182175	109182525	1	chr12_109182175	Degs2	0	109182375	109182575	109182462	22	148	17.6
12	111281850	111285525	1	chr12_111281850	Rage	0	111285125	111285450	111285287	74	663	55.6
12	111591050	111591225	1	chr12_111591050	Traf3	0	111590950	111591200	111591037	27	203	34.1
12	111947925	111949425	1	chr12_111947925	Gm266	0	111948650	111948850	111948712	33	225	26.8
12	111951200	111951775	1	chr12_111951200	Gm266	0	111951500	111951525	111951512	14	14	1.4
12	112723875	112725275	1	chr12_112723875	Kif26a	0	112724650	112724675	112724662	13	13	2
12	117023675	117023950	1	chr12_117023675	Ptprn2	0	117023750	117023950	117023862	23	158	10.1
12	117614750	117616075	1	chr12_117614750	mmu-mir-153	0	117615425	117615500	117615462	15	42	4.9
12	117702275	117704600	1	chr12_117702275	mmu-mir-153	0	117703125	117703500	117703287	56	576	53.6
12	118192725	118195125	1	chr12_118192725	Cdca7l	0	118193525	118193725	118193662	28	189	30
12	118964250	118965550	1	chr12_118964250	Sp4	0	118964050	118964550	118964162	29	406	71.6
12	119092450	119094000	1	chr12_119092450	Sp8	0	119092800	119092875	119092837	14	41	7.4
12	119102400	119103625	1	chr12_119102400	Sp8	0	119103550	119103925	119103687	57	580	49.2
12	119210450	119211425	1	chr12_119210450	Sp8	0	119210475	119210900	119210712	93	875	46.5
12	119354200	119355225	1	chr12_119354200	Sp8	0	119354550	119354700	119354587	17	99	10.8
15	3910325	3911500	1	chr15_3910325	Fbxo4	0	3910825	3910850	3910837	14	14	0.7
15	5842550	5843650	1	chr15_5842550	Dab2	0	5843100	5843300	5843112	25	177	3.4
15	6575900	6576725	1	chr15_6575900	Fyb	0	6575775	6576150	6575862	21	270	20
15	6610400	6613375	1	chr15_6610400	4921505C17Rik	0	6611325	6611550	6611387	30	223	32.8
15	7228150	7228900	1	chr15_7228150	Egflam	0	7228625	7228900	7228737	30	268	19.1
15	7427075	7428550	1	chr15_7427075	Egflam	0	7427400	7427525	7427437	17	77	11.2
15	7477125	7479050	1	chr15_7477125	Egflam	0	7478250	7478775	7478712	17	271	44.7
15	8037700	8039075	1	chr15_8037700	Wdr70	0	8038000	8038100	8038037	15	55	4.6
15	8662300	8663150	1	chr15_8662300	Slc1a3	0	8662925	8663075	8662937	15	85	7.3
15	9061200	9063300	1	chr15_9061200	Skp2	0	9061825	9062050	9061937	27	200	22.3
15	9843200	9844175	1	chr15_9843200	C230086A09Rik	0	9842900	9843275	9843137	69	660	37.3
15	10587225	10590125	1	chr15_10587225	Rai14	0	10588175	10588250	10588237	14	40	6.3
15	11512200	11513350	1	chr15_11512200	Tars	0	11512900	11513150	11513012	24	197	16.2
15	12141475	12142525	1	chr15_12141475	Mtmr12	0	12141675	12141700	12141687	14	14	2.8
15	12217100	12220875	1	chr15_12217100	Golph3	0	12219950	12220150	12220062	22	155	26.7
15	12393300	12394300	1	chr15_12393300	Golph3	0	12394075	12394275	12394162	16	112	19.1
15	12596500	12597775	1	chr15_12596500	Pdzd2	0	12597375	12597650	12597537	36	292	34.4
15	12652475	12653725	1	chr15_12652475	Pdzd2	0	12653000	12653350	12653162	60	543	32.8
15	12662000	12663275	1	chr15_12662000	6030458C11Rik	0	12662975	12663025	12662987	14	27	5
15	12841675	12843225	1	chr15_12841675	Rnasen	0	12842700	12842975	12842812	25	214	27.8
15	12860000	12861950	1	chr15_12860000	Rnasen	0	12861300	12861575	12861437	28	228	26.4
15	25622075	25624325	1	chr15_25622075	Myo10	0	25623300	25623325	25623312	13	13	2.2
15	27525625	27526850	1	chr15_27525625	BC087945	0	27526400	27526650	27526487	30	244	23.6
15	30016400	30016575	1	chr15_30016400	Ctnnd2	0	30016425	30016575	30016487	14	81	10.2
15	31071775	31071975	1	chr15_31071775	Dap	0	31071625	31071975	31071837	55	518	39.5
15	31237025	31239600	1	chr15_31237025	Dap	0	31238975	31239250	31239087	35	280	19.6
15	31492700	31494125	1	chr15_31492700	2012-03-06	0	31493425	31493575	31493537	14	77	14.4
15	34255025	34255625	1	chr15_34255025	Matn2	0	34255250	34255425	34255287	15	97	18.4
15	34769125	34770075	1	chr15_34769125	Kcns2	0	34769025	34769350	34769187	32	290	27.7
15	34855850	34856050	1	chr15_34855850	Kcns2	0	34855700	34856075	34855862	55	532	16.8
15	36960575	36960600	1	chr15_36960575	Zfp706	0	36960575	36960650	36960612	14	40	1.4
15	37182000	37184125	1	chr15_37182000	Grhl2	0	37183125	37183450	37183212	25	269	31.4
15	37345450	37346850	1	chr15_37345450	Grhl2	0	37346300	37346475	37346337	17	106	18.4
15	37524425	37525300	1	chr15_37524425	Ncald	0	37524850	37524975	37524887	15	74	7.4
15	38226025	38228425	1	chr15_38226025	Klf10	0	38227025	38227125	38227112	17	57	10.2
15	38768400	38768850	1	chr15_38768400	Baalc	0	38768675	38768750	38768712	20	54	8.9
15	39476600	39478100	1	chr15_39476600	Tm7sf4	0	39476600	39477125	39476862	144	1585	41.3
15	39557275	39558800	1	chr15_39557275	Tm7sf4	0	39558675	39559200	39559012	117	1328	56.4
15	39596650	39598275	1	chr15_39596650	Tm7sf4	0	39597925	39598125	39598062	29	196	31.1
15	41488575	41489575	1	chr15_41488575	Oxr1	0	41488850	41489050	41488987	22	154	10.6
15	41494650	41495600	1	chr15_41494650	Oxr1	0	41495025	41495050	41495037	14	14	1.8
15	41711725	41714325	1	chr15_41711725	Abra	0	41713275	41713325	41713287	15	29	5.4
15	51787425	51789400	1	chr15_51787425	Rad21	0	51788400	51788700	51788562	34	291	28.5
15	51867150	51868575	1	chr15_51867150	Aard	0	51867200	51867375	51867287	18	118	21.8
15	52995925	52999450	1	chr15_52995925	Ext1	0	52996575	52996850	52996687	43	358	28.5
15	53146100	53147500	1	chr15_53146100	Ext1	0	53146325	53146475	53146462	15	81	11.2
15	58050250	58052000	1	chr15_58050250	Fbxo32	0	58051425	58051625	58051562	20	143	18.4
15	58840225	58843325	1	chr15_58840225	Mtss1	0	58840800	58841000	58840912	25	169	20.2
15	59353675	59355675	1	chr15_59353675	Trib1	0	59353975	59354050	59354012	14	40	7.5
15	61823000	61825600	1	chr15_61823000	Myc	0	61824500	61824775	61824662	25	224	24.2
15	61933875	61937600	1	chr15_61933875	Myc	0	61936325	61936375	61936362	14	27	4.6
15	61960650	61962175	1	chr15_61960650	Myc	0	61961375	61961550	61961487	25	151	18.3
15	61975850	61979400	1	chr15_61975850	Myc	0	61977175	61977350	61977287	19	114	17.6
15	64419750	64420000	1	chr15_64419750	Ddef1	0	64419875	64420050	64419987	20	123	15.4
15	72932050	72933150	1	chr15_72932050	Chrac1	0	72931950	72932100	72931987	15	80	15.4
15	73240575	73242100	1	chr15_73240575	Ptk2	0	73241550	73241575	73241562	13	13	1.5
15	75775100	75777075	1	chr15_75775100	Zfp623	0	75776050	75776375	75776237	62	510	33.2
15	76935700	76937750	1	chr15_76935700	Rbm9	0	76936800	76936975	76936887	17	113	19.1
15	80762700	80765675	1	chr15_80762700	Adsl	0	80764675	80764875	80764762	21	142	14.1
15	83076075	83076125	1	chr15_83076075	A4galt	0	83076025	83076175	83076112	32	175	25.7
15	83156300	83158000	1	chr15_83156300	Arfgap3	0	83157250	83157400	83157287	16	88	12.8
15	83458975	83459350	1	chr15_83458975	Ttll12	0	83458975	83459125	83459037	18	103	17.2
15	84108900	84110200	1	chr15_84108900	Parvg	0	84109900	84110275	84110087	62	579	37.7
15	90017200	90017275	1	chr15_90017200	Alg10b	0	90017250	90017500	90017387	32	245	25.1
15	90845425	90846450	1	chr15_90845425	Kif21a	0	90846400	90846700	90846537	45	399	35.1
15	91599100	91600425	1	chr15_91599100	Muc19	0	91599925	91600075	91599987	18	95	16.8
15	92243375	92243950	1	chr15_92243375	Cntn1	0	92243600	92243675	92243612	14	41	7.5
15	93316550	93318625	1	chr15_93316550	Pphln1	0	93317725	93318100	93317887	63	598	40.8
15	94449225	94449900	1	chr15_94449225	Tmem117	0	94449175	94449375	94449262	21	145	12.8
15	95615725	95616800	1	chr15_95615725	Tmem16f	0	95616200	95616450	95616387	37	293	29.3
15	96071575	96073925	1	chr15_96071575	Arid2	0	96072750	96073125	96073062	17	208	27.5
15	96160250	96162450	1	chr15_96160250	Arid2	0	96161500	96161675	96161587	36	212	35.3
15	96193075	96193800	1	chr15_96193075	Arid2	0	96193525	96193550	96193537	14	14	2.4
15	96529875	96533875	1	chr15_96529875	Slc38a2	0	96530625	96530900	96530737	45	381	44.4
15	97221900	97225200	1	chr15_97221900	Amigo2	0	97224675	97224825	97224687	16	93	14.2
15	100437400	100438625	1	chr15_100437400	Dazap2	0	100437425	100437450	100437437	13	13	2
15	102962025	102963950	1	chr15_102962025	Smug1	0	102962800	102962900	102962812	17	67	12.4
15	103346975	103353250	1	chr15_103346975	Ppp1r1a	0	103348200	103348225	103348212	22	22	4.3
14	8112200	8113975	1	chr14_8112200	4930452B06Rik	0	8112950	8113175	8113087	32	225	14.4
14	8465250	8466325	1	chr14_8465250	4930452B06Rik	0	8465600	8465750	8465712	14	71	6.7
14	10465975	10467325	1	chr14_10465975	Ptprg	0	10466475	10466725	10466612	28	216	21.6
14	10491700	10494300	1	chr14_10491700	Ptprg	0	10493075	10493250	10493112	19	111	15.2
14	10758025	10761200	1	chr14_10758025	3830406C13Rik	0	10761100	10761125	10761112	13	13	1
14	11131100	11132975	1	chr14_11131100	Fezf2	0	11131450	11131500	11131462	17	34	6.7
14	11483450	11484500	1	chr14_11483450	Cadps	0	11483650	11483875	11483737	24	173	20.7
14	11631125	11631875	1	chr14_11631125	Cadps	0	11631200	11631925	11631362	58	767	38.8
14	12707600	12708600	1	chr14_12707600	Thoc7	0	12708050	12708250	12708162	26	170	20.7
14	14111775	14113475	1	chr14_14111775	Lrrc3b	0	14112825	14113075	14112912	33	266	26.8
14	16488725	16489725	1	chr14_16488725	Thrb	0	16489000	16489225	16489087	23	171	16.9
14	18717225	18719325	1	chr14_18717225	Gng2	0	18718000	18718100	18718037	17	64	7.3
14	18781375	18781625	1	chr14_18781375	Gng2	0	18781450	18781500	18781462	17	33	6.3
14	18838375	18839675	1	chr14_18838375	Gng2	0	18839225	18839625	18839387	87	868	49
14	19637775	19638225	1	chr14_19637775	Plau	0	19637875	19638025	19637937	18	94	13.3
14	20372900	20376325	1	chr14_20372900	Myst4	0	20375775	20375850	20375787	13	38	6.3
14	21949075	21950200	1	chr14_21949075	Kcnma1	0	21949200	21949325	21949237	14	66	4
14	22186400	22186775	1	chr14_22186400	Kcnma1	0	22186225	22186525	22186362	33	282	17.2
14	24195225	24197200	1	chr14_24195225	Rai17	0	24195975	24196175	24196112	18	125	18.9
14	24280800	24282675	1	chr14_24280800	Rai17	0	24281850	24281950	24281887	14	53	7.8
14	25359350	25359975	1	chr14_25359350	Slmap	0	25359300	25359500	25359362	15	108	14
14	26094550	26097650	1	chr14_26094550	Arhgef3	0	26095325	26095525	26095437	22	144	18.4
14	27782250	27783400	1	chr14_27782250	Lrtm1	0	27782325	27782525	27782412	20	134	16.3
14	28624300	28625300	1	chr14_28624300	Cacna2d3	0	28624425	28624675	28624562	26	209	32.1
14	35825500	35826925	1	chr14_35825500	Gcap14	0	35825825	35826200	35826012	92	822	41.8
14	39772625	39774525	1	chr14_39772625	Sh2d4b	0	39773475	39773900	39773662	36	474	44.4
14	44367150	44369775	1	chr14_44367150	Gnpnat1	0	44367300	44367525	44367462	31	245	39.8
14	44415550	44416625	1	chr14_44415550	Plekhc1	0	44415925	44416025	44415962	16	61	8.2
14	47020800	47021725	1	chr14_47020800	Peli2	0	47021250	47021450	47021387	23	149	22.8
14	48064700	48065525	1	chr14_48064700	Nat12	0	48065000	48065050	48065012	13	26	4.5
14	48196925	48198050	1	chr14_48196925	1700011H14Rik	0	48197250	48197800	48197437	38	582	55.2
14	48369925	48370950	1	chr14_48369925	Slc35f4	0	48369575	48370000	48369787	137	1318	66.2
14	49891525	49893975	1	chr14_49891525	Pnp	0	49891575	49891850	49891712	33	295	40.5
14	50067950	50068875	1	chr14_50067950	Ear5	0	50068850	50068875	50068862	14	14	2.1
14	53369025	53370025	1	chr14_53369025	Slc7a7	0	53369975	53370200	53370012	35	237	33.9
14	55242175	55243350	1	chr14_55242175	Gzmb	0	55242975	55243000	55242987	13	13	1
14	56683700	56687400	1	chr14_56683700	Lats2	0	56686750	56687225	56686987	126	1419	100.7
14	57041425	57041750	1	chr14_57041425	Fgf9	0	57041425	57041725	57041562	29	261	25.6
14	57055525	57055650	1	chr14_57055525	Fgf9	0	57055500	57055850	57055662	39	387	35.5
14	57309300	57310650	1	chr14_57309300	Fgf9	0	57310500	57310650	57310587	20	103	11.9
14	57740750	57742000	1	chr14_57740750	EG380907	0	57741725	57741800	57741787	15	42	4.9
14	59790775	59791550	1	chr14_59790775	Mipep	0	59790950	59791175	59791037	31	234	20.5
14	59958250	59960700	1	chr14_59958250	Tnfrsf19	0	59959325	59959675	59959487	41	445	48
14	59976625	59977750	1	chr14_59976625	Tnfrsf19	0	59977325	59977550	59977437	26	181	9.8
14	60749475	60751300	1	chr14_60749475	mmu-mir-1196	0	60750275	60750400	60750312	14	67	7.8
14	62889775	62891200	1	chr14_62889775	Sox7	0	62890650	62890925	62890787	26	219	38
14	63117400	63117875	1	chr14_63117400	1700049K14Rik	0	63117825	63117975	63117837	14	77	10.9
14	63549100	63553975	1	chr14_63549100	mmu-mir-124-1	0	63549100	63549250	63549212	20	103	16.6
14	65167600	65168450	1	chr14_65167600	Ptk2b	0	65168275	65168400	65168337	19	88	14
14	65978800	65982375	1	chr14_65978800	Bnip3l	0	65979725	65980000	65979862	36	287	26.7
14	66629275	66630350	1	chr14_66629275	Cdca2	0	66629600	66629650	66629612	13	26	3.1
14	66925850	66925900	1	chr14_66925850	Dock5	0	66925750	66925875	66925812	18	77	9.2
14	68412275	68414400	1	chr14_68412275	Chmp7	0	68413475	68413625	68413587	18	89	8.9
14	74100800	74102550	1	chr14_74100800	3110050K21Rik	0	74101625	74101850	74101712	21	161	20.8
14	74732650	74733825	1	chr14_74732650	Gtf2f2	0	74732875	74733075	74733012	22	138	13.3
14	75000875	75002100	1	chr14_75000875	Tsc22d1	0	75001275	75001525	75001412	58	470	48.7
14	75983325	75985925	1	chr14_75983325	D230005D02Rik	0	75984850	75985175	75985012	67	617	49.2
14	76242950	76245950	1	chr14_76242950	LOC629678	0	76243425	76243625	76243562	19	130	13.5
14	76380675	76383225	1	chr14_76380675	LOC629678	0	76382450	76382550	76382537	14	53	9.6
14	77022275	77023275	1	chr14_77022275	Tnfsf11	0	77023075	77023575	77023312	183	1980	76.4
14	77171900	77173275	1	chr14_77171900	Tnfsf11	0	77172525	77172750	77172587	24	182	18.2
14	98149025	98151125	1	chr14_98149025	Klf5	0	98149875	98150075	98149987	23	158	11.9
14	98158100	98159125	1	chr14_98158100	Klf5	0	98158475	98158650	98158537	18	118	14.9
14	98161850	98162550	1	chr14_98161850	Klf5	0	98161650	98161875	98161737	26	193	12
14	98420025	98421125	1	chr14_98420025	Klf5	0	98420475	98420725	98420562	22	175	24
14	98992000	98993625	1	chr14_98992000	Klf12	0	98992775	98992850	98992812	15	43	7.3
14	99232900	99233175	1	chr14_99232900	Klf12	0	99233175	99233300	99233287	19	77	13.5
14	104312475	104313725	1	chr14_104312475	Ndfip2	0	104313200	104313300	104313287	27	105	19.8
14	104634250	104634300	1	chr14_104634250	Spry2	0	104634125	104634275	104634187	19	102	17.6
14	104688225	104688275	1	chr14_104688225	Spry2	0	104688100	104688350	104688212	27	216	15.9
14	104790125	104791225	1	chr14_104790125	Spry2	0	104790500	104790625	104790537	21	90	13
14	114087975	114088400	1	chr14_114087975	Gpc5	0	114087950	114088175	114088062	28	201	30.2
14	115751525	115752875	1	chr14_115751525	Gpc6	0	115752100	115752375	115752212	27	230	31
14	115779975	115780875	1	chr14_115779975	Gpc6	0	115780650	115781000	115780862	42	397	26.3
14	117299775	117300550	1	chr14_117299775	Sox21	0	117299825	117300200	117300012	55	536	40.2
14	119528975	119530775	1	chr14_119528975	Rap2a	0	119529475	119529800	119529637	31	293	27
14	120033750	120034500	1	chr14_120033750	Ranbp5	0	120034250	120034300	120034287	15	28	4.6
14	120035350	120036525	1	chr14_120035350	Ranbp5	0	120036075	120036250	120036137	16	102	14.9
14	120353775	120354825	1	chr14_120353775	Stk24	0	120354550	120354725	120354587	33	186	31.1
14	121396925	121399275	1	chr14_121396925	Clybl	0	121398425	121398450	121398437	16	16	3.1
14	121401425	121403500	1	chr14_121401425	Clybl	0	121402850	121403125	121402987	52	446	56.1
14	121411325	121414925	1	chr14_121411325	Clybl	0	121412550	121412600	121412562	19	38	7.3
14	121527150	121530000	1	chr14_121527150	EG328479	0	121528400	121528625	121528487	38	273	33.8
17	4049050	4049600	1	chr17_4049050	Nox3	0	4048800	4049125	4048937	54	488	14.9
17	4119375	4121150	1	chr17_4119375	Nox3	0	4119975	4120175	4120087	23	158	15.8
17	4923000	4924700	1	chr17_4923000	Arid1b	0	4923775	4923975	4923837	21	147	19.6
17	4962975	4964650	1	chr17_4962975	Arid1b	0	4963925	4964025	4963937	23	86	16.2
17	5651275	5652275	1	chr17_5651275	Snx9	0	5651500	5651575	5651512	14	42	7
17	9040975	9041975	1	chr17_9040975	1700010I14Rik	0	9040700	9041150	9040787	31	374	45.2
17	9565525	9567125	1	chr17_9565525	Qk	0	9566025	9566400	9566212	55	517	40.1
17	9747950	9750575	1	chr17_9747950	Qk	0	9749300	9749450	9749387	18	100	11.9
17	9759850	9760800	1	chr17_9759850	Qk	0	9760450	9760600	9760487	14	81	7.3
17	10357400	10358725	1	chr17_10357400	Qk	0	10358025	10358325	10358162	30	271	24.9
17	10410175	10411725	1	chr17_10410175	Qk	0	10410900	10411225	10411062	33	314	29.6
17	11195875	11196775	1	chr17_11195875	Park2	0	11196525	11196775	11196612	31	255	23.9
17	11805375	11806250	1	chr17_11805375	Agpat4	0	11806200	11806225	11806212	13	13	2.5
17	11949275	11950675	1	chr17_11949275	Agpat4	0	11949650	11949875	11949687	19	156	22.8
17	13468475	13469725	1	chr17_13468475	Mllt4	0	13469625	13469650	13469637	13	13	2.1
17	15382950	15385475	1	chr17_15382950	Chd1	0	15385025	15385150	15385112	17	76	14.1
17	17112950	17113425	1	chr17_17112950	Lix1	0	17113300	17113325	17113312	13	13	2.2
17	17129600	17130625	1	chr17_17129600	Lix1	0	17129700	17129925	17129787	49	362	43.4
17	21823400	21824900	1	chr17_21823400	6.72e+21	0	21823475	21823825	21823637	59	547	35.5
17	24522200	24522925	1	chr17_24522200	Hs3st6	0	24522225	24522425	24522312	23	160	22.1
17	27877300	27879150	1	chr17_27877300	Scube3	0	27877600	27877725	27877687	17	77	11.7
17	28881375	28884900	1	chr17_28881375	9830134C10Rik	0	28883300	28883325	28883312	14	14	2.8
17	29131900	29133725	1	chr17_29131900	Fgd2	0	29132550	29132850	29132687	60	492	51.4
17	29760275	29761525	1	chr17_29760275	Zfand3	0	29761125	29761350	29761212	24	183	21.1
17	30104500	30106350	1	chr17_30104500	Btbd9	0	30105250	30105475	30105362	30	212	30.2
17	31530525	31536425	1	chr17_31530525	Snf1lk	0	31535000	31535250	31535087	28	234	34.9
17	31859175	31860800	1	chr17_31859175	Notch3	0	31859275	31859475	31859387	27	192	22.2
17	35420300	35423375	1	chr17_35420300	Ier3	0	35420450	35420675	35420537	23	179	28.1
17	37143075	37143750	1	chr17_37143075	Olfr111	0	37143275	37143500	37143362	30	218	13.8
17	37598325	37598750	1	chr17_37598325	Olfr761	0	37598500	37599000	37598762	92	1006	41.8
17	43020650	43022475	1	chr17_43020650	Pla2g7	0	43021875	43021950	43021937	14	40	7.3
17	43174600	43175625	1	chr17_43174600	Cyp39a1	0	43174975	43175350	43175162	38	410	37.8
17	45336575	45336875	1	chr17_45336575	Vegfa	0	45336800	45336900	45336812	13	51	8.7
17	46157825	46158750	1	chr17_46157825	Ppp2r5d	0	46158025	46158150	46158137	16	72	8.8
17	48145950	48146650	1	chr17_48145950	Unc5cl	0	48146175	48146200	48146187	13	13	2.2
17	48279875	48280800	1	chr17_48279875	Lrfn2	0	48280450	48280750	48280637	25	237	24.4
17	48464400	48465950	1	chr17_48464400	Lrfn2	0	48465475	48465550	48465487	14	42	8.4
17	48513500	48513775	1	chr17_48513500	Lrfn2	0	48513650	48513725	48513687	14	40	6
17	51300725	51305550	1	chr17_51300725	Satb1	0	51304375	51304675	51304537	45	385	44.1
17	52075425	52077250	1	chr17_52075425	Kcnh8	0	52076325	52076625	52076512	46	376	24.2
17	52108000	52109000	1	chr17_52108000	Kcnh8	0	52107725	52108125	52107937	55	582	34.4
17	55543925	55547225	1	chr17_55543925	Ccdc94	0	55545275	55545600	55545462	105	903	47.1
17	63268150	63268750	1	chr17_63268150	Fert2	0	63268400	63268575	63268487	31	186	26.3
17	63513850	63515725	1	chr17_63513850	Fert2	0	63514550	63514700	63514612	15	80	13.7
17	63738425	63739425	1	chr17_63738425	Fert2	0	63738850	63739125	63738987	40	328	33.4
17	63745900	63746125	1	chr17_63745900	Fert2	0	63745775	63745925	63745887	17	84	14.1
17	64769650	64770050	1	chr17_64769650	Man2a1	0	64769825	64770300	64770012	63	750	85.9
17	65642675	65644200	1	chr17_65642675	Rab31	0	65643175	65643400	65643312	25	174	25.7
17	65855175	65856900	1	chr17_65855175	Twsg1	0	65855800	65856000	65855887	32	217	33.4
17	66006450	66008525	1	chr17_66006450	ORF19	0	66007825	66008025	66007912	26	169	25
17	66129675	66130175	1	chr17_66129675	Ddx11	0	66129725	66129975	66129812	37	274	27.9
17	66317175	66318925	1	chr17_66317175	1110012J17Rik	0	66317350	66317400	66317387	15	29	4.7
17	67598500	67599950	1	chr17_67598500	Lama1	0	67598875	67599200	67599037	41	370	29
17	67820900	67823400	1	chr17_67820900	Arhgap28	0	67821950	67822100	67822012	15	84	14.4
17	69125825	69129300	1	chr17_69125825	Epb4.1l3	0	69126800	69127125	69126962	40	386	34.9
17	69945100	69946650	1	chr17_69945100	Dlgap1	0	69945700	69945975	69945862	34	275	37
17	70770075	70771525	1	chr17_70770075	mmu-mir-1195	0	70771325	70771800	70771637	69	889	78.5
17	74678875	74679450	1	chr17_74678875	Ttc27	0	74678700	74678900	74678787	21	133	20.7
17	78790575	78791000	1	chr17_78790575	Eif2ak2	0	78790775	78790800	78790787	16	16	2.9
17	79039475	79041550	1	chr17_79039475	Qpct	0	79040275	79040600	79040412	33	303	47.2
17	79654675	79655350	1	chr17_79654675	Cyp1b1	0	79654800	79654825	79654812	13	13	2.5
17	80482750	80483700	1	chr17_80482750	Cdkl4	0	80483125	80483225	80483137	13	49	9.8
17	80507575	80508750	1	chr17_80507575	Cdkl4	0	80507850	80507975	80507912	19	82	7.7
17	80620725	80625000	1	chr17_80620725	Map4k3	0	80623200	80623425	80623287	23	170	14.9
17	82180300	82181625	1	chr17_82180300	Slc8a1	0	82181200	82181575	82181387	42	446	40.6
17	82345100	82345625	1	chr17_82345100	Slc8a1	0	82345500	82345725	82345687	17	123	14.1
17	83074050	83075175	1	chr17_83074050	AW548124	0	83074975	83075175	83075037	36	249	33.4
17	84060200	84061200	1	chr17_84060200	Zfp36l2	0	84060750	84060950	84060862	17	118	17
17	84405225	84406475	1	chr17_84405225	Plekhh2	0	84405500	84405550	84405537	14	27	3.8
17	84503975	84505350	1	chr17_84503975	Dync2li1	0	84504925	84504975	84504962	20	39	7.4
17	84622225	84624800	1	chr17_84622225	Abcg8	0	84622150	84622400	84622237	40	318	28.8
17	85165150	85165500	1	chr17_85165150	1700106N22Rik	0	85165250	85165625	85165437	39	430	47.9
17	86523625	86525600	1	chr17_86523625	Epas1	0	86524625	86524800	86524712	19	110	12.7
17	87466750	87468575	1	chr17_87466750	Tacstd1	0	87466775	87467125	87466962	74	662	57
17	87584700	87586975	1	chr17_87584700	Msh2	0	87586075	87586250	87586137	23	144	21.4
17	87718025	87718125	1	chr17_87718025	Kcnk12	0	87717975	87718175	87718087	25	164	22.3
17	88236375	88237950	1	chr17_88236375	Foxn2	0	88237250	88237475	88237387	32	245	34.9
17	88517325	88518175	1	chr17_88517325	Ston1	0	88517825	88517900	88517837	13	37	5.6
17	90298100	90300025	1	chr17_90298100	Nrxn1	0	90298725	90299025	90298887	45	404	50.7
17	93616525	93617950	1	chr17_93616525	Adcyap1	0	93617425	93617625	93617512	24	164	21.4
16	6769175	6770000	1	chr16_6769175	A2bp1	0	6769200	6769450	6769287	19	156	20.2
16	6990000	6992325	1	chr16_6990000	A2bp1	0	6990100	6990400	6990212	33	285	16.8
16	8629675	8639325	1	chr16_8629675	Usp7	0	8639325	8639600	8639487	26	231	17.7
16	8688625	8689350	1	chr16_8688625	Usp7	0	8688875	8689175	8689012	50	457	48.5
16	8996275	8997225	1	chr16_8996275	1810013L24Rik	0	8997175	8997575	8997387	82	828	34.4
16	9142650	9144400	1	chr16_9142650	1810013L24Rik	0	9143700	9143975	9143787	17	161	15.8
16	9192750	9195150	1	chr16_9192750	1810013L24Rik	0	9193350	9193550	9193487	21	149	17
16	9197500	9199075	1	chr16_9197500	1810013L24Rik	0	9197850	9198275	9198062	73	837	53.3
16	9303750	9305150	1	chr16_9303750	1810013L24Rik	0	9304625	9304925	9304737	34	320	33.5
16	9914975	9916025	1	chr16_9914975	Grin2a	0	9915250	9915300	9915262	13	26	1
16	11174150	11174775	1	chr16_11174150	Gspt1	0	11174250	11174525	11174362	33	240	18.2
16	12546200	12547200	1	chr16_12546200	Ercc4	0	12546175	12546375	12546262	22	148	16.3
16	12681200	12682750	1	chr16_12681200	Ercc4	0	12681875	12682125	12681987	25	191	18.4
16	12874350	12874800	1	chr16_12874350	Ercc4	0	12874400	12874825	12874587	41	475	44.5
16	13477075	13478225	1	chr16_13477075	Parn	0	13477000	13477225	13477087	25	177	19.4
16	16479950	16480900	1	chr16_16479950	Fgd4	0	16480400	16480725	16480587	26	272	21.4
16	17308525	17309650	1	chr16_17308525	Snap29	0	17308875	17309050	17308962	24	145	26.4
16	17920500	17921500	1	chr16_17920500	Vpreb2	0	17920700	17920900	17920812	21	141	14.4
16	18635475	18639275	1	chr16_18635475	Cldn5	0	18638325	18638575	18638412	29	224	27.8
16	18682225	18683700	1	chr16_18682225	Cldn5	0	18683175	18683400	18683262	38	265	36.7
16	22551350	22552675	1	chr16_22551350	Dgkg	0	22552650	22552950	22552762	62	534	36.2
16	22715025	22716875	1	chr16_22715025	Crygs	0	22715700	22716125	22715887	121	1198	60.3
16	23176475	23178350	1	chr16_23176475	St6gal1	0	23177675	23177875	23177712	19	135	23.3
16	23397275	23398250	1	chr16_23397275	Masp1	0	23397575	23397825	23397737	22	161	13.3
16	23419025	23420575	1	chr16_23419025	Masp1	0	23419725	23420025	23419887	54	469	40.2
16	24791000	24792000	1	chr16_24791000	mmu-mir-28	0	24791000	24791300	24791137	50	416	38.7
16	29796775	29797700	1	chr16_29796775	Gm1968	0	29797625	29797750	29797637	17	83	12.7
16	29801575	29804200	1	chr16_29801575	Gm1968	0	29802875	29803175	29803012	24	234	25.8
16	30658725	30662200	1	chr16_30658725	BC022623	0	30661075	30661150	30661112	18	53	9.4
16	30956875	30958050	1	chr16_30956875	AI480653	0	30957075	30957375	30957237	38	312	26.5
16	31087175	31090700	1	chr16_31087175	Centb2	0	31089325	31089625	31089487	66	586	41.1
16	31408075	31409675	1	chr16_31408075	Bdh1	0	31408850	31409075	31408937	19	145	23
16	31745775	31746075	1	chr16_31745775	Mfi2	0	31745750	31746000	31745862	31	249	13.3
16	33040950	33042225	1	chr16_33040950	Lmln	0	33041375	33041450	33041387	13	38	4.3
16	33060875	33063900	1	chr16_33060875	Osbpl11	0	33063375	33063400	33063387	15	15	2.8
16	33899275	33899725	1	chr16_33899275	Umps	0	33899675	33899875	33899737	25	178	18.6
16	34587200	34588950	1	chr16_34587200	Ropn1	0	34588175	34588300	34588212	20	91	13.7
16	35065850	35067100	1	chr16_35065850	Adcy5	0	35065950	35066300	35066112	117	1032	51.8
16	35156425	35157600	1	chr16_35156425	Adcy5	0	35156900	35157125	35156987	30	214	22.8
16	35823800	35824625	1	chr16_35823800	Parp14	0	35823850	35824175	35824037	39	359	29.6
16	36532925	36533275	1	chr16_36532925	Casr	0	36533025	36533200	36533137	17	101	12.1
16	36568750	36570025	1	chr16_36568750	Cd86	0	36568550	36568900	36568712	82	727	47.8
16	36593325	36595475	1	chr16_36593325	Cd86	0	36594150	36594275	36594187	18	79	13
16	38325450	38328050	1	chr16_38325450	Pla1a	0	38326850	38327150	38327037	99	835	51.7
16	38389800	38391925	1	chr16_38389800	Cd80	0	38390975	38391275	38391162	38	346	43.2
16	38864725	38864850	1	chr16_38864725	Igsf11	0	38864550	38864750	38864637	20	144	23.3
16	40535600	40536325	1	chr16_40535600	Lsamp	0	40536050	40536200	40536087	17	93	14
16	41553350	41554600	1	chr16_41553350	Lsamp	0	41553200	41553625	41553387	106	1031	45.4
16	41941825	41942250	1	chr16_41941825	Gap43	0	41941950	41942250	41942112	49	419	29.9
16	42188475	42189300	1	chr16_42188475	Gap43	0	42188650	42188725	42188662	18	51	9.8
16	42288000	42289000	1	chr16_42288000	Gap43	0	42288625	42288675	42288662	17	31	5.7
16	42419300	42420525	1	chr16_42419300	Gap43	0	42420000	42420200	42420112	20	140	15.8
16	42689500	42690225	1	chr16_42689500	Gap43	0	42689600	42689775	42689737	22	129	12.7
16	43305150	43305950	1	chr16_43305150	Zbtb20	0	43305050	43305200	43305087	17	94	14.7
16	44302225	44303025	1	chr16_44302225	Ccdc52	0	44302825	44303150	44303012	45	400	32.7
16	44636000	44636700	1	chr16_44636000	BC027231	0	44636100	44636225	44636162	19	89	16.1
16	46019900	46021150	1	chr16_46019900	Cd96	0	46021125	46021375	46021262	44	342	32.4
16	48341550	48342575	1	chr16_48341550	Morc1	0	48342075	48342425	48342237	47	449	39.8
16	49780775	49781800	1	chr16_49780775	Cd47	0	49781150	49781225	49781162	14	39	4.3
16	49948825	49950225	1	chr16_49948825	Cd47	0	49949400	49949550	49949487	20	105	8.7
16	57163725	57165750	1	chr16_57163725	Tbc1d23	0	57164600	57164875	57164712	30	278	38.3
16	57496750	57497450	1	chr16_57496750	2610528E23Rik	0	57497300	57497550	57497437	32	246	16.3
16	59488000	59488200	1	chr16_59488000	BC043118	0	59487700	59488075	59487887	48	496	29.3
16	64826150	64827950	1	chr16_64826150	Cggbp1	0	64827500	64828175	64827587	42	562	68.3
16	64828450	64828500	1	chr16_64828450	Cggbp1	0	64828450	64828600	64828462	14	84	14
16	72575300	72576575	1	chr16_72575300	Robo1	0	72575925	72576050	72576012	14	67	3.8
16	72585475	72586450	1	chr16_72585475	Robo1	0	72586275	72586450	72586362	18	111	16.9
16	72587325	72588025	1	chr16_72587325	Robo1	0	72588000	72588200	72588037	17	120	6.6
16	72893000	72895075	1	chr16_72893000	Robo1	0	72894050	72894225	72894112	21	133	20.5
16	72978100	72979650	1	chr16_72978100	Robo1	0	72979300	72979750	72979462	71	752	51.1
16	78710675	78711000	1	chr16_78710675	Chodl	0	78710375	78710700	78710512	75	614	29.2
16	88608100	88610225	1	chr16_88608100	Krtap13-1	0	88608850	88609325	88609137	90	1134	74
16	90074250	90075650	1	chr16_90074250	Sod1	0	90074850	90074875	90074862	13	13	2.4
16	90917850	90919350	1	chr16_90917850	4932438H23Rik	0	90918425	90918550	90918487	18	82	13.4
16	91321175	91322025	1	chr16_91321175	Il10rb	0	91321850	91322025	91321912	22	141	23.7
16	92261775	92262175	1	chr16_92261775	Kcne1	0	92262075	92262275	92262187	22	140	16.6
16	93811275	93814650	1	chr16_93811275	Chaf1b	0	93811600	93811725	93811687	28	118	16.6
16	96168625	96168850	1	chr16_96168625	Brwd1	0	96168625	96168875	96168712	25	205	12.8
19	3433550	3437350	1	chr19_3433550	Gal	0	3434800	3434850	3434812	15	28	4.7
19	5224050	5226050	1	chr19_5224050	Pacs1	0	5224625	5224875	5224712	31	243	20.9
19	6568575	6570050	1	chr19_6568575	Slc22a12	0	6569700	6569850	6569712	16	88	12.7
19	7328175	7328800	1	chr19_7328175	Rcor2	0	7328450	7328900	7328662	69	737	53.8
19	7419600	7421050	1	chr19_7419600	Mark2	0	7420775	7420975	7420837	23	149	26.1
19	8759325	8760925	1	chr19_8759325	Slc3a2	0	8759725	8759950	8759862	34	250	34.2
19	8783675	8784875	1	chr19_8783675	Slc3a2	0	8783525	8783725	8783612	30	201	28.5
19	10412900	10415375	1	chr19_10412900	Syt7	0	10414975	10415275	10415112	42	356	40.6
19	10440175	10440550	1	chr19_10440175	Syt7	0	10440450	10440475	10440462	13	13	2.1
19	10741825	10745375	1	chr19_10741825	Vps37c	0	10743750	10744175	10743912	33	415	45.4
19	10902025	10903775	1	chr19_10902025	Cd6	0	10902825	10903025	10902912	24	160	23.7
19	11040125	11042375	1	chr19_11040125	E530011F12Rik	0	11039600	11040125	11039962	93	1090	85.5
19	12798000	12799575	1	chr19_12798000	Cntf	0	12798050	12798300	12798162	17	156	15.6
19	14610675	14611750	1	chr19_14610675	Tle4	0	14610925	14611050	14611037	14	62	9.9
19	14732825	14734675	1	chr19_14732825	Tle4	0	14733575	14733700	14733612	24	114	17.3
19	14937950	14943025	1	chr19_14937950	Tle4	0	14941100	14941325	14941187	27	195	21.1
19	15561725	15562575	1	chr19_15561725	Psat1	0	15562450	15562850	15562612	44	472	16.1
19	16525975	16527750	1	chr19_16525975	Gna14	0	16526400	16526650	16526562	30	235	33.5
19	16530775	16533425	1	chr19_16530775	Gna14	0	16531850	16532150	16531962	49	429	32.1
19	21449075	21449300	1	chr19_21449075	Gda	0	21448950	21449150	21449037	19	130	23.3
19	21883750	21886250	1	chr19_21883750	Tmem2	0	21885100	21885500	21885337	42	507	56
19	21961150	21963050	1	chr19_21961150	Tmem2	0	21961850	21962300	21962012	107	1113	52.2
19	22890175	22892100	1	chr19_22890175	mmu-mir-204	0	22890900	22891050	22890937	21	117	18
19	23171225	23171900	1	chr19_23171225	Klf9	0	23171625	23171825	23171812	15	103	16.1
19	23287800	23288800	1	chr19_23287800	Smc5l1	0	23287775	23287900	23287812	17	76	8.7
19	23724425	23724750	1	chr19_23724425	1700028P14Rik	0	23724475	23724575	23724537	17	64	8.8
19	24557125	24560325	1	chr19_24557125	2900009I07Rik	0	24559675	24559875	24559762	19	124	10.1
19	25545275	25546275	1	chr19_25545275	Dmrt1	0	25546225	25546600	25546412	98	936	65.9
19	26206950	26209425	1	chr19_26206950	Smarca2	0	26207875	26207925	26207887	14	27	2.9
19	28247775	28249150	1	chr19_28247775	Rfx3	0	28248750	28249150	28248962	69	715	36.2
19	28632850	28633925	1	chr19_28632850	Glis3	0	28632600	28632875	28632787	37	327	33.7
19	28715050	28717800	1	chr19_28715050	Glis3	0	28717000	28717025	28717012	13	13	2.4
19	29250700	29251625	1	chr19_29250700	mmu-mir-101b	0	29251250	29251325	29251287	14	40	7.4
19	29416350	29418400	1	chr19_29416350	5033414D02Rik	0	29417125	29417350	29417212	30	218	27.4
19	29720825	29722000	1	chr19_29720825	D19Wsu12e	0	29721050	29721375	29721187	33	324	34.5
19	31170350	31173075	1	chr19_31170350	Cstf2t	0	31172025	31172375	31172212	53	514	45.2
19	32290100	32292375	1	chr19_32290100	Tmem23	0	32291050	32291175	32291087	16	75	14.5
19	32384725	32386850	1	chr19_32384725	Tmem23	0	32384825	32385000	32384887	22	141	21.8
19	33029350	33031350	1	chr19_33029350	B430203M17Rik	0	33030150	33030300	33030187	19	98	16.3
19	35167450	35167650	1	chr19_35167450	Mphosph1	0	35167250	35167650	35167437	68	689	30.4
19	36754875	36756350	1	chr19_36754875	Ppp1r3c	0	36755050	36755325	36755187	34	284	25.6
19	37209475	37211850	1	chr19_37209475	Cpeb3	0	37211075	37211175	37211087	14	54	7.8
19	37943025	37944300	1	chr19_37943025	Fer1l3	0	37942950	37943325	37943137	100	960	68.3
19	38373225	38374275	1	chr19_38373225	Lgi1	0	38373750	38373875	38373787	15	71	7.4
19	40313675	40315650	1	chr19_40313675	Pdlim1	0	40314800	40314825	40314812	13	13	1.5
19	41217200	41219375	1	chr19_41217200	Tll2	0	41217675	41217950	41217812	28	229	21.1
19	41494275	41494800	1	chr19_41494275	Pik3ap1	0	41494725	41495050	41494887	49	450	37.3
19	41575175	41575775	1	chr19_41575175	Lcor	0	41575650	41575875	41575737	23	169	19.8
19	42945050	42945075	1	chr19_42945050	Hps1	0	42945025	42945200	42945037	16	105	11.5
19	43856975	43857900	1	chr19_43856975	Abcc2	0	43857200	43857300	43857287	18	63	9.5
19	44101950	44102775	1	chr19_44101950	Cyp2c44	0	44102450	44102825	44102637	85	812	58.9
19	44326625	44327825	1	chr19_44326625	Scd2	0	44327700	44327725	44327712	13	13	1.5
19	46116900	46124800	1	chr19_46116900	Nolc1	0	46121475	46121525	46121487	16	31	5.9
19	46496500	46497975	1	chr19_46496500	Sufu	0	46497025	46497150	46497037	14	66	8.5
19	47040525	47043075	1	chr19_47040525	Nt5c2	0	47041775	47041975	47041837	33	211	31.7
19	47843600	47844600	1	chr19_47843600	6330577E15Rik	0	47843650	47843850	47843737	23	157	21.4
19	48703550	48703625	1	chr19_48703550	Sorcs3	0	48703350	48703550	48703412	17	126	11.6
19	50492425	50493250	1	chr19_50492425	Sorcs1	0	50493050	50493325	50493187	37	309	35.6
19	50697175	50697800	1	chr19_50697175	Sorcs1	0	50697250	50697475	50697337	31	221	20.1
19	53145600	53146200	1	chr19_53145600	Add3	0	53145650	53145950	53145787	39	359	37.4
19	54108775	54109550	1	chr19_54108775	Adra2a	0	54109150	54109500	54109337	45	426	31.8
19	54840400	54841025	1	chr19_54840400	Gpam	0	54840475	54840675	54840562	23	156	15.4
19	55544000	55546725	1	chr19_55544000	Vti1a	0	55544925	55545325	55545062	62	650	56.1
19	55595125	55597325	1	chr19_55595125	Tcf7l2	0	55596550	55596825	55596687	26	214	40.5
19	59466125	59466450	1	chr19_59466125	Emx2	0	59466075	59466200	59466137	14	66	6.7
19	60109150	60110875	1	chr19_60109150	Rab11fip2	0	60109575	60110100	60109762	63	714	55.3
19	60128150	60128200	1	chr19_60128150	Rab11fip2	0	60128075	60128375	60128212	36	325	34.2
19	60244175	60245175	1	chr19_60244175	D19Ertd737e	0	60243975	60244175	60244037	19	139	20.7
18	3821800	3822600	1	chr18_3821800	Bambi	0	3822125	3822400	3822237	30	269	26.8
18	3840775	3841825	1	chr18_3840775	Lyzl1	0	3840950	3841125	3840962	16	109	14.1
18	10310925	10311125	1	chr18_10310925	AK220484	0	10311100	10311400	10311237	31	277	36.2
18	10461425	10462675	1	chr18_10461425	AK220484	0	10460975	10461525	10461187	97	1186	65.4
18	11629625	11630925	1	chr18_11629625	Rbbp8	0	11630425	11630825	11630637	88	836	53.3
18	12988250	12990550	1	chr18_12988250	Osbpl1a	0	12988850	12989100	12988962	23	177	21.2
18	13176050	13177925	1	chr18_13176050	Hrh4	0	13177650	13177850	13177837	21	138	16.9
18	13854475	13856750	1	chr18_13854475	Zfp521	0	13855700	13856175	13855912	180	1835	45.4
18	13899950	13900125	1	chr18_13899950	Zfp521	0	13899900	13899950	13899912	13	26	4
18	14816300	14817600	1	chr18_14816300	Ss18	0	14817450	14817700	14817587	33	265	38
18	16757575	16758000	1	chr18_16757575	Cdh2	0	16757775	16757950	16757812	18	106	7.5
18	16808700	16809325	1	chr18_16808700	Cdh2	0	16808600	16808825	16808712	25	190	13.8
18	17425500	17425950	1	chr18_17425500	Cdh2	0	17425375	17425800	17425562	97	947	29.6
18	21065950	21066150	1	chr18_21065950	Rnf125	0	21065975	21066250	21066087	40	321	19
18	21576650	21578200	1	chr18_21576650	Gm944	0	21578000	21578025	21578012	14	14	2.7
18	24772325	24773225	1	chr18_24772325	Mocos	0	24772725	24772925	24772837	30	185	32.5
18	24958875	24959775	1	chr18_24958875	Fhod3	0	24959175	24959275	24959187	16	62	7.7
18	25708350	25712025	1	chr18_25708350	Brunol4	0	25709175	25709300	25709237	17	77	11.3
18	26853125	26854300	1	chr18_26853125	Brunol4	0	26853300	26853325	26853312	13	13	1.5
18	30651450	30652375	1	chr18_30651450	Pik3c3	0	30652225	30652625	30652362	42	464	33.9
18	31840150	31840175	1	chr18_31840150	E230022H04Rik	0	31840025	31840225	31840087	20	134	19
18	31909925	31911125	1	chr18_31909925	E230022H04Rik	0	31910775	31910975	31910837	23	167	22.5
18	34576800	34576900	1	chr18_34576800	Pkd2l2	0	34576800	34576825	34576812	13	13	2.5
18	35263175	35265350	1	chr18_35263175	Ctnna1	0	35263950	35264425	35264187	100	1005	47.3
18	36677950	36679350	1	chr18_36677950	Ankhd1	0	36678525	36678650	36678562	15	68	13.4
18	38515725	38517725	1	chr18_38515725	Ndfip1	0	38517025	38517100	38517037	13	37	6.3
18	39097500	39100550	1	chr18_39097500	Arhgap26	0	39098625	39099025	39098762	44	476	44.3
18	41169225	41169375	1	chr18_41169225	Yipf5	0	41169250	41169500	41169362	33	261	13.8
18	42029225	42030175	1	chr18_42029225	C330008K14Rik	0	42029275	42029375	42029287	13	51	7.8
18	42215375	42217925	1	chr18_42215375	Sh3rf2	0	42217150	42217175	42217162	13	13	1.4
18	42433525	42434450	1	chr18_42433525	Lars	0	42434000	42434375	42434137	89	869	49.2
18	42858775	42860125	1	chr18_42858775	Gpr151	0	42859125	42859325	42859187	21	147	17.9
18	43417750	43418400	1	chr18_43417750	Stk32a	0	43418000	43418275	43418137	32	256	21.1
18	44698750	44700400	1	chr18_44698750	Mcc	0	44698675	44698875	44698812	16	113	18.3
18	47618450	47618950	1	chr18_47618450	Sema6a	0	47618150	47618600	47618362	73	822	61.7
18	47619950	47622725	1	chr18_47619950	Sema6a	0	47621275	47621575	47621412	34	308	37.6
18	47693925	47695650	1	chr18_47693925	Sema6a	0	47695100	47695150	47695112	13	26	4.5
18	53536375	53540150	1	chr18_53536375	Ppic	0	53536875	53537125	53536987	31	243	30.3
18	54005500	54007175	1	chr18_54005500	Csnk1g3	0	54006400	54006450	54006412	15	30	5.7
18	54843850	54844500	1	chr18_54843850	Zfp608	0	54844475	54845150	54844637	46	946	52.6
18	54845150	54846075	1	chr18_54845150	Zfp608	0	54844475	54845150	54844637	46	946	52.6
18	55035800	55037100	1	chr18_55035800	Zfp608	0	55036750	55037000	55036887	34	268	36.7
18	56592525	56594575	1	chr18_56592525	Gramd3	0	56593200	56593350	56593262	20	102	11.5
18	60876825	60879650	1	chr18_60876825	Rps14	0	60878625	60878775	60878712	19	99	7
18	62389075	62391000	1	chr18_62389075	Htr4	0	62389875	62390075	62390012	30	196	14.9
18	64049675	64050750	1	chr18_64049675	Txnl1	0	64049975	64050325	64050162	56	535	39.4
18	64144350	64145275	1	chr18_64144350	St8sia3	0	64144800	64144925	64144837	19	83	11.2
18	64313725	64315100	1	chr18_64313725	St8sia3	0	64314375	64314475	64314462	15	55	10.6
18	65945275	65946750	1	chr18_65945275	Sec11c	0	65946275	65946475	65946387	27	178	20.2
18	65957475	65959125	1	chr18_65957475	Sec11c	0	65958650	65958950	65958812	38	354	46.8
18	67685525	67687275	1	chr18_67685525	Spire1	0	67686200	67686425	67686337	24	177	31.1
18	67857750	67858675	1	chr18_67857750	Ptpn2	0	67857775	67857975	67857862	18	126	18.2
18	68220450	68221950	1	chr18_68220450	D18Ertd653e	0	68220750	68220875	68220787	17	76	8.2
18	69048500	69049525	1	chr18_69048500	Tcf4	0	69049450	69049825	69049637	61	568	39.7
18	69529525	69530250	1	chr18_69529525	Tcf4	0	69529875	69530050	69529987	19	114	16.5
18	75970875	75972775	1	chr18_75970875	Zbtb7c	0	75972000	75972100	75972062	18	68	11.3
18	76296725	76298175	1	chr18_76296725	Smad2	0	76297050	76297075	76297062	15	15	2.9
18	76313575	76317925	1	chr18_76313575	Smad2	0	76316350	76316500	76316437	23	128	22.1
18	77756150	77765200	1	chr18_77756150	8030462N17Rik	0	77765025	77765225	77765062	30	201	28.3
18	78265825	78267375	1	chr18_78265825	Slc14a1	0	78266675	78266700	78266687	13	13	1.7
18	81338375	81340075	1	chr18_81338375	Sall3	0	81338800	81338975	81338812	19	129	16.5
18	81413325	81415525	1	chr18_81413325	Sall3	0	81413850	81414400	81413987	44	548	57.3
18	81782175	81783050	1	chr18_81782175	Sall3	0	81782050	81782450	81782312	31	376	28.6
18	82646225	82648750	1	chr18_82646225	Mbp	0	82648100	82648200	82648112	15	57	10.2
18	83004225	83007400	1	chr18_83004225	Zfp516	0	83006800	83007100	83006912	54	469	39.8
18	84505425	84505500	1	chr18_84505425	Cndp1	0	84505450	84505750	84505587	26	222	25.3
6	3494025	3495225	1	chr6_3494025	Ccdc132	0	3494975	3495075	3495037	17	66	8.1
6	3502800	3503875	1	chr6_3502800	Ccdc132	0	3503525	3503700	3503562	19	120	14
6	4687250	4689750	1	chr6_4687250	Sgce	0	4688775	4689075	4688912	47	434	53.5
6	4929350	4932175	1	chr6_4929350	Ppp1r9a	0	4930200	4930500	4930362	30	293	37.6
6	4975725	4977825	1	chr6_4975725	Ppp1r9a	0	4976950	4976975	4976962	13	13	2.2
6	4982200	4984125	1	chr6_4982200	Ppp1r9a	0	4983275	4983575	4983412	39	357	30.9
6	5323900	5326425	1	chr6_5323900	Asb4	0	5324325	5324525	5324387	18	117	19
6	5705925	5707725	1	chr6_5705925	Dync1i1	0	5706775	5707100	5706962	27	278	33.8
6	5762275	5762775	1	chr6_5762275	Dync1i1	0	5762200	5762400	5762287	24	159	10.2
6	6019400	6021475	1	chr6_6019400	Slc25a13	0	6020050	6020275	6020212	26	175	23.7
6	7656475	7659100	1	chr6_7656475	Asns	0	7656825	7657000	7656887	20	122	8.8
6	7661700	7662950	1	chr6_7661700	Asns	0	7662850	7663050	7662912	16	113	11.9
6	7701925	7704250	1	chr6_7701925	Asns	0	7702950	7703400	7703112	49	576	55
6	7920775	7922050	1	chr6_7920775	C1galt1	0	7921075	7921725	7921562	37	524	82.1
6	12764575	12766250	1	chr6_12764575	Tmem106b	0	12765375	12765725	12765562	66	587	24.2
6	13046125	13047525	1	chr6_13046125	Tmem106b	0	13047025	13047250	13047137	27	199	19.7
6	18173475	18174100	1	chr6_18173475	Cftr	0	18173650	18173875	18173787	20	160	14.7
6	23305650	23306525	1	chr6_23305650	Aass	0	23306200	23306300	23306212	17	67	12.1
6	24983425	24983825	1	chr6_24983425	6332401O19Rik	0	24983025	24983525	24983237	61	741	64.1
6	28709925	28713375	1	chr6_28709925	Lrrc4	0	28712375	28712775	28712562	41	459	47.6
6	28720325	28722700	1	chr6_28720325	Lrrc4	0	28721525	28721575	28721537	17	34	6.4
6	30101850	30103650	1	chr6_30101850	mmu-mir-182	0	30103125	30103250	30103212	18	84	9.4
6	30407075	30408025	1	chr6_30407075	2700094F01Rik	0	30407275	30407300	30407287	15	15	2.8
6	31157150	31158875	1	chr6_31157150	mmu-mir-29b-1	0	31157550	31157850	31157712	29	278	28.5
6	31237550	31238575	1	chr6_31237550	Mkln1	0	31238225	31238275	31238237	15	29	4.7
6	31274750	31276250	1	chr6_31274750	Mkln1	0	31275950	31276100	31275987	24	124	21.8
6	31637100	31638400	1	chr6_31637100	Podxl	0	31637475	31637675	31637612	21	144	24.6
6	32132250	32134000	1	chr6_32132250	1700012A03Rik	0	32132950	32133175	32133087	26	193	19.6
6	32636400	32636875	1	chr6_32636400	Plxna4	0	32636725	32636925	32636812	21	132	13.3
6	33220425	33220875	1	chr6_33220425	Exoc4	0	33220475	33220625	33220587	18	98	7.8
6	34159700	34161225	1	chr6_34159700	Slc35b4	0	34160675	34160750	34160687	14	41	8.1
6	34484625	34485625	1	chr6_34484625	Bpgm	0	34484750	34485075	34484912	43	380	34.6
6	34870975	34872050	1	chr6_34870975	Stra8	0	34871675	34871875	34871837	25	175	19.4
6	35745775	35746475	1	chr6_35745775	Mtpn	0	35746400	35746700	35746562	39	344	38
6	37307000	37308750	1	chr6_37307000	Creb3l2	0	37307500	37307725	37307612	36	272	38.1
6	37519100	37519525	1	chr6_37519100	Akr1d1	0	37519050	37519375	37519187	36	343	51.4
6	37617775	37620625	1	chr6_37617775	Akr1d1	0	37619300	37619700	37619512	97	907	38.4
6	38410375	38411875	1	chr6_38410375	D130059P03Rik	0	38410850	38411050	38410937	23	158	15.9
6	38843775	38845950	1	chr6_38843775	Tbxas1	0	38844950	38845025	38845012	15	43	4.7
6	39003675	39004525	1	chr6_39003675	Parp12	0	39003825	39004075	39003987	35	279	28.1
6	39819650	39821925	1	chr6_39819650	Mrps33	0	39820600	39820625	39820612	15	15	2.7
6	39919800	39921625	1	chr6_39919800	EG434008	0	39920650	39920900	39920812	23	192	13
6	41077075	41077250	1	chr6_41077075	2210010C04Rik	0	41077150	41077425	41077287	28	235	20.5
6	47529050	47532750	1	chr6_47529050	Ezh2	0	47531600	47531625	47531612	14	14	2.4
6	47538100	47539350	1	chr6_47538100	Ezh2	0	47537925	47538150	47538012	26	186	24
6	50341775	50342625	1	chr6_50341775	Osbpl3	0	50342500	50342525	50342512	15	15	2.4
6	51437100	51441600	1	chr6_51437100	Snx10	0	51441600	51441700	51441612	15	57	9.9
6	51877400	51877700	1	chr6_51877400	Scap2	0	51877275	51877675	51877487	41	433	41.2
6	52244225	52245550	1	chr6_52244225	Evx1	0	52244375	52244550	52244462	18	117	21.6
6	52751500	52752600	1	chr6_52751500	Tax1bp1	0	52752325	52752500	52752337	17	111	16.1
6	54206900	54208225	1	chr6_54206900	Chn2	0	54207275	54207375	54207287	14	53	6.1
6	54212350	54213825	1	chr6_54212350	Chn2	0	54212975	54213175	54213112	15	107	19
6	54602125	54602625	1	chr6_54602125	2410066E13Rik	0	54602600	54602825	54602712	23	161	17.3
6	54689050	54692775	1	chr6_54689050	Znrf2	0	54690000	54690025	54690012	15	15	2.5
6	54782750	54786600	1	chr6_54782750	Znrf2	0	54784475	54784750	54784587	36	305	41.1
6	55098725	55100300	1	chr6_55098725	Inmt	0	55099425	55099700	55099587	46	352	31.7
6	60572025	60572850	1	chr6_60572025	Snca	0	60571900	60572075	60572012	17	110	13.4
6	61010050	61010450	1	chr6_61010050	Snca	0	61010425	61010575	61010462	17	87	9.8
6	64577725	64577950	1	chr6_64577725	Atoh1	0	64577850	64578050	64577937	20	150	22.1
6	64581800	64582975	1	chr6_64581800	Atoh1	0	64581825	64582025	64581887	23	154	6.8
6	64948050	64951675	1	chr6_64948050	Smarcad1	0	64951400	64951775	64951587	70	782	85.6
6	64963900	64964375	1	chr6_64963900	Smarcad1	0	64964200	64964375	64964237	23	132	22.2
6	65692875	65694475	1	chr6_65692875	Prdm5	0	65694100	65694375	65694237	31	238	27.8
6	65725075	65726000	1	chr6_65725075	Prdm5	0	65725975	65726200	65726112	25	177	19.1
6	66387125	66387900	1	chr6_66387125	Mad2l1	0	66387750	66388250	66388137	20	292	45.2
6	71025650	71026250	1	chr6_71025650	BC051244	0	71025725	71025950	71025837	26	175	20.8
6	71664975	71665775	1	chr6_71664975	Reep1	0	71665125	71665275	71665212	17	90	8.4
6	71682075	71683000	1	chr6_71682075	Reep1	0	71682375	71682525	71682412	14	83	12.8
6	71766775	71768400	1	chr6_71766775	Immt	0	71768000	71768075	71768062	16	45	7.5
6	72381475	72383225	1	chr6_72381475	Mat2a	0	72383175	72383350	72383212	19	117	15.9
6	72605800	72609425	1	chr6_72605800	Tgoln1	0	72607150	72607450	72607262	30	288	53.8
6	72687375	72696875	1	chr6_72687375	Tcf3	0	72687975	72688175	72688087	31	202	29.9
6	76568775	76569150	1	chr6_76568775	Lrrtm1	0	76569125	76569475	76569287	51	494	24
6	77121000	77122400	1	chr6_77121000	Lrrtm1	0	77121200	77121525	77121337	33	307	31.8
6	81006175	81006200	1	chr6_81006175	mmu-mir-468	0	81006175	81006350	81006312	17	103	11.7
6	81626800	81626825	1	chr6_81626800	mmu-mir-468	0	81626700	81626800	81626737	14	55	6.6
6	82154450	82154800	1	chr6_82154450	BC014699	0	82154700	82154825	82154712	17	81	10.6
6	82342750	82343150	1	chr6_82342750	Tacr1	0	82343100	82343350	82343237	24	187	7.3
6	84193700	84194750	1	chr6_84193700	Dysf	0	84193650	84193750	84193687	14	55	7.1
6	85039700	85041800	1	chr6_85039700	LOC545861	0	85040750	85040975	85040887	41	295	35.8
6	85190125	85191100	1	chr6_85190125	Emx1	0	85190175	85190275	85190212	14	53	9.2
6	86916450	86918025	1	chr6_86916450	Nfu1	0	86916450	86916875	86916662	113	1151	74
6	87510700	87511500	1	chr6_87510700	Arhgap25	0	87511325	87511650	87511462	42	363	32.5
6	88003025	88005775	1	chr6_88003025	Rab7	0	88003475	88003575	88003512	18	65	11.2
6	88941850	88942725	1	chr6_88941850	Gpr175	0	88942725	88942875	88942762	21	109	15.2
6	88955625	88956975	1	chr6_88955625	Gpr175	0	88955800	88955900	88955812	19	65	11.9
6	90526250	90527250	1	chr6_90526250	Aldh1l1	0	90526875	90527000	90526962	16	73	9.5
6	92725000	92725600	1	chr6_92725000	Prickle2	0	92725300	92725475	92725387	17	105	15.1
6	92776250	92778800	1	chr6_92776250	Adamts9	0	92777025	92777400	92777212	54	543	42
6	93096600	93097500	1	chr6_93096600	Adamts9	0	93096775	93097075	93096912	48	409	33.4
6	93225750	93226950	1	chr6_93225750	Adamts9	0	93226250	93226300	93226262	13	26	4.3
6	93315450	93316350	1	chr6_93315450	Adamts9	0	93315875	93316050	93315912	29	177	29.6
6	93680750	93684600	1	chr6_93680750	Magi1	0	93682625	93682800	93682712	27	159	27.5
6	93813375	93816875	1	chr6_93813375	Magi1	0	93815750	93815900	93815762	16	89	9.5
6	93887825	93889475	1	chr6_93887825	Magi1	0	93889025	93889100	93889037	15	43	5.4
6	94714600	94716025	1	chr6_94714600	Lrig1	0	94715975	94716450	94716212	222	2162	69.7
6	94814550	94816350	1	chr6_94814550	Lrig1	0	94816225	94816350	94816287	15	69	9.2
6	94881650	94882225	1	chr6_94881650	Kbtbd8	0	94881825	94881950	94881862	20	88	16.3
6	97631425	97632525	1	chr6_97631425	Frmd4b	0	97632250	97632700	97632587	27	408	67.5
6	98447950	98449075	1	chr6_98447950	Mitf	0	98448775	98449250	98448962	61	637	35.9
6	98491900	98493875	1	chr6_98491900	Mitf	0	98492450	98492700	98492562	38	287	27
6	98547300	98549825	1	chr6_98547300	Foxp1	0	98548475	98548675	98548562	29	201	26.5
6	99205700	99206700	1	chr6_99205700	Foxp1	0	99206225	99206550	99206412	44	398	28.9
6	99781100	99783275	1	chr6_99781100	Prok2	0	99782800	99783000	99782937	20	134	18.6
6	99992775	99993600	1	chr6_99992775	Rybp	0	99993075	99993400	99993237	42	413	36.7
6	100144900	100147925	1	chr6_100144900	Rybp	0	100146475	100146650	100146537	24	155	26.4
6	100234725	100240775	1	chr6_100234725	Rybp	0	100236225	100236500	100236412	31	273	35.9
6	100396925	100399025	1	chr6_100396925	Rybp	0	100398325	100398400	100398362	16	43	7
6	106584725	106585475	1	chr6_106584725	Il5ra	0	106584825	106584975	106584862	14	82	9.6
6	108607850	108610450	1	chr6_108607850	Bhlhb2	0	108610225	108610325	108610237	22	86	16.9
6	108760825	108764125	1	chr6_108760825	Arl8b	0	108762650	108762875	108762737	30	223	26.7
6	111412225	111412400	1	chr6_111412225	Grm7	0	111412050	111412350	111412212	46	382	22.3
6	112569725	112570925	1	chr6_112569725	Rad18	0	112569750	112570100	112569912	49	461	34.4
6	112916225	112917325	1	chr6_112916225	Srgap3	0	112916050	112916500	112916212	66	777	49.9
6	120220175	120226150	1	chr6_120220175	B4galnt3	0	120225325	120225375	120225362	15	29	5.6
6	120640975	120642675	1	chr6_120640975	Slc25a18	0	120642325	120642675	120642512	42	384	29.3
6	122655425	122657400	1	chr6_122655425	Nanog	0	122655950	122655975	122655962	14	14	2.8
6	124816075	124817050	1	chr6_124816075	Leprel2	0	124816275	124816450	124816387	22	135	20
6	125399375	125399425	1	chr6_125399375	Plekhg6	0	125399125	125399675	125399412	76	1037	95.1
6	126276450	126277600	1	chr6_126276450	Ntf3	0	126276700	126277025	126276862	28	288	30.3
6	127047000	127049500	1	chr6_127047000	Fgf23	0	127047400	127047550	127047437	20	102	17.5
6	127215600	127216200	1	chr6_127215600	Ccnd2	0	127215700	127216075	127215837	60	579	32.1
6	129076125	129076675	1	chr6_129076125	Clec2e	0	129076050	129076300	129076162	35	276	23.3
6	129329350	129330150	1	chr6_129329350	Clec12a	0	129329625	129329925	129329787	54	450	42.2
6	133927550	133930225	1	chr6_133927550	Etv6	0	133929000	133929350	133929187	77	704	43.4
6	134294575	134296225	1	chr6_134294575	Bcl2l14	0	134295350	134295625	134295437	35	302	35.9
6	134612550	134613975	1	chr6_134612550	Loh12cr1	0	134613425	134613625	134613537	24	151	25.1
6	134769775	134771525	1	chr6_134769775	Dusp16	0	134770500	134771000	134770787	40	520	54.5
6	135007800	135012175	1	chr6_135007800	Gprc5a	0	135007625	135008000	135007837	73	694	44.4
6	135529850	135529925	1	chr6_135529850	Emp1	0	135529400	135529875	135529712	36	487	37.7
6	136520800	136523950	1	chr6_136520800	Atf7ip	0	136522975	136523025	136522987	17	32	6.1
6	136632475	136633475	1	chr6_136632475	1100001H23Rik	0	136633100	136633250	136633187	18	95	12.3
6	137728750	137730125	1	chr6_137728750	Dera	0	137730125	137730300	137730237	18	112	5.7
6	142767200	142767650	1	chr6_142767200	Cmas	0	142767325	142767350	142767337	14	14	2.5
6	142952500	142954400	1	chr6_142952500	St8sia1	0	142954200	142954225	142954212	14	14	1.5
6	142978325	142979150	1	chr6_142978325	St8sia1	0	142978050	142978375	142978162	34	328	42.9
6	144317900	144318525	1	chr6_144317900	Sox5	0	144318475	144318950	144318662	86	889	65.1
6	144410775	144411700	1	chr6_144410775	Sox5	0	144411475	144411950	144411712	129	1311	64.8
6	148248200	148248250	1	chr6_148248200	Ergic2	0	148248150	148248275	148248262	14	66	12.7
6	148251675	148252700	1	chr6_148251675	Ergic2	0	148251800	148252000	148251912	29	209	33.9
6	148294450	148296000	1	chr6_148294450	Tmtc1	0	148295700	148296050	148295862	41	401	34.2
6	148838675	148839725	1	chr6_148838675	C1qdc1	0	148839725	148839900	148839837	20	119	18.3
6	149085675	149087400	1	chr6_149085675	4833442J19Rik	0	149086375	149086625	149086437	29	245	35.5
1	3904100	3904500	1	chr1_3904100	Xkr4	0	3904125	3904550	3904287	56	616	33.2
1	4871100	4872150	1	chr1_4871100	Tcea1	0	4872050	4872075	4872062	13	13	1
1	5124075	5125100	1	chr1_5124075	Atp6v1h	0	5124950	5125075	5124962	18	81	15.4
1	5127025	5127750	1	chr1_5127025	Atp6v1h	0	5127325	5127350	5127337	13	13	2.1
1	5222250	5223225	1	chr1_5222250	Atp6v1h	0	5222950	5223175	5223062	30	225	33.7
1	5252300	5252525	1	chr1_5252300	Atp6v1h	0	5252475	5252575	5252487	13	51	5.4
1	6132875	6133525	1	chr1_6132875	Rb1cc1	0	6132950	6133125	6132987	19	118	18.7
1	6438975	6439975	1	chr1_6438975	Rb1cc1	0	6438250	6439300	6439012	60	1251	81.3
1	7036700	7038725	1	chr1_7036700	Pcmtd1	0	7037425	7037600	7037487	31	194	30.3
1	7302650	7304025	1	chr1_7302650	Pcmtd1	0	7303350	7303750	7303512	50	536	43.4
1	7309100	7310475	1	chr1_7309100	Pcmtd1	0	7309275	7309600	7309412	28	282	23.6
1	7441750	7442125	1	chr1_7441750	Pcmtd1	0	7441675	7441900	7441787	20	149	15.5
1	8570850	8571800	1	chr1_8570850	Sntg1	0	8571775	8572100	8571962	39	316	11.2
1	10016650	10018500	1	chr1_10016650	Cops5	0	10016950	10017075	10016987	19	84	12.3
1	10838200	10839600	1	chr1_10838200	Cpa6	0	10838225	10838450	10838287	19	159	14.2
1	11081850	11083100	1	chr1_11081850	C030045D06Rik	0	11081875	11082075	11081987	16	114	3.6
1	11485975	11487925	1	chr1_11485975	A830018L16Rik	0	11486825	11487150	11486987	51	476	38.7
1	12748250	12749900	1	chr1_12748250	Sulf1	0	12748375	12748525	12748462	19	97	16.5
1	13116375	13119900	1	chr1_13116375	Prdm14	0	13117275	13117500	13117412	26	202	21.6
1	14210425	14211200	1	chr1_14210425	Eya1	0	14210725	14210975	14210837	28	230	16.1
1	14277625	14277800	1	chr1_14277625	Eya1	0	14277550	14277750	14277612	28	194	26.7
1	14406200	14406500	1	chr1_14406200	Eya1	0	14406425	14406500	14406437	14	40	3.5
1	16115075	16116175	1	chr1_16115075	Rdh10	0	16115150	16115525	16115337	91	848	46.2
1	17235325	17236325	1	chr1_17235325	Gdap1	0	17235950	17236275	17236087	41	360	33.4
1	20744925	20745775	1	chr1_20744925	Il17f	0	20745650	20745700	20745687	15	28	4.2
1	20746500	20746575	1	chr1_20746500	Il17f	0	20746575	20746875	20746737	39	351	29.9
1	20939875	20940525	1	chr1_20939875	Paqr8	0	20940100	20940350	20940212	26	200	22.8
1	21215975	21218075	1	chr1_21215975	Gsta3	0	21216850	21217150	21217037	21	195	22.5
1	25126500	25126800	1	chr1_25126500	Lmbrd1	0	25126425	25126700	25126562	35	284	20.7
1	30791725	30793525	1	chr1_30791725	Phf3	0	30792400	30792500	30792437	18	66	10.9
1	33215950	33216375	1	chr1_33215950	Prim2	0	33216150	33216175	33216162	13	13	2
1	33500200	33501075	1	chr1_33500200	Prim2	0	33500375	33500500	33500462	14	66	9.9
1	33687225	33687725	1	chr1_33687225	Bag2	0	33687225	33687300	33687237	15	42	7.1
1	33990050	33991100	1	chr1_33990050	Dst	0	33990325	33990350	33990337	15	15	2.7
1	34347225	34347525	1	chr1_34347225	2310061I09Rik	0	34347250	34347275	34347262	15	15	2
1	34412675	34413675	1	chr1_34412675	Ptpn18	0	34413075	34413375	34413212	47	389	22.9
1	36993850	36994525	1	chr1_36993850	Tmem131	0	36993700	36994050	36993862	45	409	38.7
1	38563250	38567625	1	chr1_38563250	Lonrf2	0	38566575	38566600	38566587	19	19	3.8
1	39067050	39068425	1	chr1_39067050	Npas2	0	39067275	39067375	39067337	20	70	12.7
1	41083950	41086075	1	chr1_41083950	Tmem182	0	41085075	41085425	41085262	75	672	38.7
1	41334175	41335200	1	chr1_41334175	Tmem182	0	41334825	41335150	41334962	54	484	35.1
1	42002900	42003375	1	chr1_42002900	Pou3f3	0	42003050	42003425	42003237	76	719	35.6
1	43763600	43767950	1	chr1_43763600	Uxs1	0	43764725	43764825	43764762	17	59	6.7
1	44558125	44558325	1	chr1_44558125	Gulp1	0	44557875	44558425	44558062	59	680	47.2
1	46807650	46809000	1	chr1_46807650	Slc39a10	0	46808100	46808275	46808137	17	107	10.2
1	46866225	46866675	1	chr1_46866225	Slc39a10	0	46866175	46866525	46866362	36	364	54
1	51480750	51481800	1	chr1_51480750	Obfc2a	0	51480500	51481100	51480762	67	845	66.9
1	51703100	51703875	1	chr1_51703100	Myo1b	0	51703400	51703450	51703412	13	26	4.6
1	51849100	51854000	1	chr1_51849100	Myo1b	0	51851125	51851275	51851187	20	103	9.5
1	51875575	51876975	1	chr1_51875575	Myo1b	0	51876175	51876500	51876337	39	379	33.4
1	52808600	52809200	1	chr1_52808600	Hibch	0	52808800	52809150	52808962	63	589	31
1	55131375	55132600	1	chr1_55131375	3222401M22Rik	0	55131500	55131700	55131612	28	189	25.1
1	55149325	55151125	1	chr1_55149325	3222401M22Rik	0	55150375	55150600	55150487	29	219	23.7
1	56613250	56614000	1	chr1_56613250	Hsfy2	0	56613375	56613450	56613437	14	39	7.7
1	56628625	56629050	1	chr1_56628625	Hsfy2	0	56629000	56629250	56629137	31	254	17.9
1	57414600	57416000	1	chr1_57414600	1110034B05Rik	0	57414875	57415350	57415062	52	643	37.7
1	58132575	58133675	1	chr1_58132575	Aox4	0	58133075	58133425	58133262	43	407	42.9
1	58514800	58515725	1	chr1_58514800	BC049806	0	58515025	58515300	58515162	29	244	20.7
1	59259200	59260800	1	chr1_59259200	Als2	0	59259625	59259825	59259687	28	190	26.7
1	59673200	59674675	1	chr1_59673200	Bmpr2	0	59673275	59673475	59673287	17	96	16.6
1	60376400	60377400	1	chr1_60376400	Abi2	0	60377175	60377325	60377262	21	116	17.3
1	60485975	60486525	1	chr1_60485975	Raph1	0	60486050	60486100	60486062	14	28	2.1
1	60782975	60784550	1	chr1_60782975	Ctla4	0	60783700	60783900	60783812	23	172	26.7
1	62116000	62117100	1	chr1_62116000	Nrp2	0	62115900	62116425	62116137	57	761	56.1
1	63942725	63943475	1	chr1_63942725	Klf7	0	63943375	63943600	63943462	27	202	14.5
1	64350275	64351075	1	chr1_64350275	Creb1	0	64350200	64350400	64350312	20	130	20
1	64511275	64512225	1	chr1_64511275	2310038H17Rik	0	64510950	64511275	64511137	28	290	24.4
1	64662075	64665775	1	chr1_64662075	Fzd5	0	64664475	64664525	64664512	14	27	4.9
1	70951225	70952200	1	chr1_70951225	Bard1	0	70951475	70951500	70951487	13	13	2
1	71543050	71544675	1	chr1_71543050	Fn1	0	71543475	71543675	71543562	21	145	17.5
1	72198025	72199975	1	chr1_72198025	Pecr	0	72198750	72198850	72198837	18	67	13.4
1	72423075	72424800	1	chr1_72423075	2012-03-04	0	72424100	72424225	72424137	18	77	10.8
1	72725000	72726725	1	chr1_72725000	Igfbp2	0	72726475	72726700	72726537	29	231	15.1
1	73434150	73434500	1	chr1_73434150	Tnp1	0	73433950	73434150	73434012	21	153	23.7
1	74515475	74517025	1	chr1_74515475	Zfp142	0	74515900	74516050	74515962	22	114	19.4
1	75550975	75551675	1	chr1_75550975	Slc4a3	0	75551150	75551175	75551162	13	13	2.4
1	75770975	75772250	1	chr1_75770975	Slc4a3	0	75771675	75772075	75771837	27	333	51.1
1	75910875	75913400	1	chr1_75910875	Slc4a3	0	75912100	75912500	75912187	24	312	32.1
1	75919275	75920475	1	chr1_75919275	Slc4a3	0	75919500	75919525	75919512	13	13	2
1	77322350	77325275	1	chr1_77322350	Epha4	0	77324850	77324900	77324862	13	26	4.5
1	80115600	80117325	1	chr1_80115600	A830043J08Rik	0	80116425	80116850	80116587	97	990	44.3
1	84284125	84286075	1	chr1_84284125	5033414K04Rik	0	84286075	84286150	84286087	15	42	7.5
1	88031700	88033375	1	chr1_88031700	Armc9	0	88032600	88032850	88032687	29	223	32.4
1	88139850	88141100	1	chr1_88139850	B3gnt7	0	88140375	88140775	88140587	98	984	67.9
1	88380300	88381650	1	chr1_88380300	Ptma	0	88381450	88381550	88381487	15	58	6.4
1	89559225	89561425	1	chr1_89559225	Atg16l1	0	89560200	89560625	89560437	67	709	54
1	90637825	90642525	1	chr1_90637825	Arl4c	0	90639000	90639275	90639137	35	302	38.5
1	90644075	90645150	1	chr1_90644075	Arl4c	0	90644550	90644600	90644562	16	32	5.6
1	90755200	90756575	1	chr1_90755200	Sh3bp4	0	90755475	90755650	90755537	21	130	17.9
1	91765000	91768375	1	chr1_91765000	Gbx2	0	91767125	91767275	91767212	19	95	11.5
1	92731225	92732475	1	chr1_92731225	Mlph	0	92731675	92731900	92731812	23	175	17.6
1	92869325	92871250	1	chr1_92869325	Lrrfip1	0	92869150	92869350	92869187	28	183	24.7
1	95567850	95569175	1	chr1_95567850	Thap4	0	95568225	95568400	95568287	14	95	14.7
1	97584950	97585250	1	chr1_97584950	St8sia4	0	97585150	97585175	97585162	13	13	2.4
1	99453150	99453725	1	chr1_99453150	D1Ertd622e	0	99453175	99453550	99453387	51	497	39.5
1	99902425	99903775	1	chr1_99902425	Pam	0	99903550	99903900	99903712	46	442	44.7
1	99915825	99918625	1	chr1_99915825	Pam	0	99916900	99917175	99917012	40	325	27
1	106920925	106924375	1	chr1_106920925	Rnf152	0	106922550	106922950	106922737	57	574	26
1	108026975	108027750	1	chr1_108026975	Tnfrsf11a	0	108027300	108027400	108027337	15	57	9.6
1	108049275	108049700	1	chr1_108049275	Tnfrsf11a	0	108049575	108049800	108049662	25	180	23.9
1	108391225	108392250	1	chr1_108391225	Bcl2	0	108392075	108392275	108392162	20	141	15.8
1	120238075	120239825	1	chr1_120238075	Clasp1	0	120239175	120239375	120239337	16	106	12
1	121281225	121282425	1	chr1_121281225	Inhbb	0	121281250	121281600	121281437	78	664	25
1	121393075	121394225	1	chr1_121393075	2500001K11Rik	0	121393525	121393575	121393562	14	27	4.2
1	121461800	121463050	1	chr1_121461800	Epb4.1l5	0	121462450	121462725	121462512	52	422	58
1	121695700	121697125	1	chr1_121695700	Ptpn4	0	121696475	121696725	121696612	23	189	21.5
1	128580150	128581675	1	chr1_128580150	E030049G20Rik	0	128581300	128581375	128581312	13	39	4.6
1	129606550	129616725	1	chr1_129606550	Ccnt2	0	129611750	129611850	129611762	14	51	7.7
1	130219075	130222725	1	chr1_130219075	Dars	0	130219875	130220300	130220062	90	924	61.4
1	130226450	130229475	1	chr1_130226450	Dars	0	130227850	130228175	130227987	64	585	26.5
1	130234375	130234675	1	chr1_130234375	Dars	0	130234475	130234675	130234562	24	155	19.6
1	130287025	130287525	1	chr1_130287025	Dars	0	130287150	130287225	130287162	13	38	2.8
1	130424700	130424950	1	chr1_130424700	Cxcr4	0	130424550	130424750	130424612	22	157	27
1	133325650	133326725	1	chr1_133325650	Srgap2	0	133325900	133326000	133325987	15	56	9.1
1	133546100	133547625	1	chr1_133546100	Slc26a9	0	133546725	133547075	133546887	29	307	34.2
1	133574825	133575525	1	chr1_133574825	Slc26a9	0	133575050	133575100	133575062	17	33	5.6
1	134563675	134564050	1	chr1_134563675	Nfasc	0	134563825	134564000	134563862	17	107	7.4
1	137431625	137433450	1	chr1_137431625	Nav1	0	137432500	137432550	137432512	13	26	4.5
1	138491975	138501525	1	chr1_138491975	Zfp281	0	138496625	138496900	138496737	39	341	37.4
1	138543575	138545825	1	chr1_138543575	Zfp281	0	138544300	138544625	138544437	62	616	67.9
1	138554375	138554850	1	chr1_138554375	Zfp281	0	138554500	138554700	138554562	18	124	18.7
1	138990175	138991300	1	chr1_138990175	Nr5a2	0	138990400	138990675	138990562	63	512	65.9
1	140419850	140420975	1	chr1_140419850	Nek7	0	140420425	140420675	140420512	24	197	19.8
1	142250425	142252300	1	chr1_142250425	Kcnt2	0	142251350	142251525	142251412	19	117	19.6
1	153055225	153056600	1	chr1_153055225	Ivns1abp	0	153056050	153056175	153056087	19	84	12.8
1	154704600	154706275	1	chr1_154704600	Nmnat2	0	154705250	154705525	154705362	46	372	38.5
1	154735075	154736750	1	chr1_154735075	Nmnat2	0	154736025	154736275	154736162	25	219	31.1
1	154888650	154889700	1	chr1_154888650	Lamc2	0	154889425	154889475	154889437	14	28	5.2
1	154961750	154963425	1	chr1_154961750	Lamc2	0	154961850	154961950	154961862	22	86	16.3
1	155109000	155110775	1	chr1_155109000	Lamc1	0	155110000	155110325	155110162	77	679	44.8
1	155146825	155147900	1	chr1_155146825	1700012A16Rik	0	155147450	155147575	155147537	20	92	16.8
1	156796975	156797775	1	chr1_156796975	Ier5	0	156797475	156797750	156797562	25	228	14.4
1	158399400	158402075	1	chr1_158399400	Abl2	0	158402050	158402325	158402237	21	183	25
1	158797275	158799375	1	chr1_158797275	Ralgps2	0	158798125	158798325	158798262	30	208	24.2
1	158800325	158802875	1	chr1_158800325	Ralgps2	0	158802075	158802175	158802162	14	52	5.3
1	158816375	158817375	1	chr1_158816375	Ralgps2	0	158816475	158816700	158816562	28	207	15.2
1	162054875	162054950	1	chr1_162054875	Cacybp	0	162054700	162055050	162054837	27	292	27.8
1	164999625	165001375	1	chr1_164999625	Prrx1	0	165000475	165000675	165000512	30	210	26.5
1	168136750	168138150	1	chr1_168136750	Mael	0	168137350	168137475	168137387	18	84	11.9
1	169114500	169116175	1	chr1_169114500	Uck2	0	169116100	169116275	169116137	22	140	14
1	169284950	169286225	1	chr1_169284950	Lrrc52	0	169285275	169285500	169285362	29	212	26.3
1	169332925	169334975	1	chr1_169332925	Lrrc52	0	169334600	169334950	169334787	76	676	34.8
1	170050275	170051350	1	chr1_170050275	Pbx1	0	170050775	170050950	170050912	27	164	27.1
1	172216625	172217300	1	chr1_172216625	1700015E13Rik	0	172217250	172217400	172217337	19	90	10.1
1	172314450	172315150	1	chr1_172314450	Nos1ap	0	172314375	172314675	172314537	64	495	34.5
1	172487425	172488525	1	chr1_172487425	Olfml2b	0	172488225	172488450	172488287	30	214	19.6
1	172533400	172534425	1	chr1_172533400	Olfml2b	0	172533200	172533450	172533337	23	171	19
1	173306075	173308300	1	chr1_173306075	F11r	0	173308175	173308400	173308237	36	251	37.1
1	174158825	174160375	1	chr1_174158825	Kcnj9	0	174159975	174160250	174160087	31	258	29.2
1	174254825	174255675	1	chr1_174254825	Pigm	0	174254925	174255175	174255037	39	307	36
1	175255500	175255950	1	chr1_175255500	Aim2	0	175255575	175255725	175255612	23	129	21.6
1	176860675	176861125	1	chr1_176860675	Grem2	0	176860900	176861025	176860937	18	82	12.1
1	178481000	178481900	1	chr1_178481000	mmu-mir-350	0	178480875	178481325	178481162	46	526	39.8
1	180570500	180572125	1	chr1_180570500	BC056349	0	180571300	180571575	180571437	48	397	25.4
1	180686025	180687975	1	chr1_180686025	BC056349	0	180687250	180687575	180687412	91	741	39.5
1	180922850	180925825	1	chr1_180922850	BC056349	0	180924275	180924500	180924387	26	207	33.4
1	181440350	181441350	1	chr1_181440350	9630058J23Rik	0	181441125	181441400	181441262	39	300	33.2
1	181464025	181465625	1	chr1_181464025	Sccpdh	0	181464575	181464600	181464587	13	13	2.2
1	181559575	181560050	1	chr1_181559575	Sccpdh	0	181559825	181559975	181559862	19	102	15.4
1	183579250	183579300	1	chr1_183579250	A230079K17Rik	0	183579125	183579325	183579237	27	181	26.7
1	183839300	183843750	1	chr1_183839300	Enah	0	183840150	183840175	183840162	15	15	2.1
1	183868025	183870100	1	chr1_183868025	Enah	0	183867900	183868075	183867987	24	133	22.2
1	184133650	184133975	1	chr1_184133650	Degs1	0	184133925	184134075	184133937	15	73	13.1
1	186197425	186198275	1	chr1_186197425	Hlx1	0	186197800	186198100	186197962	37	313	32.7
1	186780800	186781175	1	chr1_186780800	Mark1	0	186780900	186781125	186780962	29	206	20.5
1	186798775	186800125	1	chr1_186798775	Mark1	0	186799775	186800025	186799912	35	269	28.6
1	187961425	187962600	1	chr1_187961425	Lyplal1	0	187962275	187962500	187962387	22	170	24
1	188210775	188212925	1	chr1_188210775	Tgfb2	0	188211300	188211675	188211487	73	675	44.5
1	188623800	188623975	1	chr1_188623800	D1Pas1	0	188623600	188623925	188623737	74	650	46.8
1	188654650	188656875	1	chr1_188654650	D1Pas1	0	188655475	188655750	188655612	17	171	24.3
1	189424725	189426375	1	chr1_189424725	Esrrg	0	189425425	189425675	189425562	32	246	26.4
1	191832175	191833225	1	chr1_191832175	Prox1	0	191832300	191832400	191832337	14	54	8.7
1	193398775	193399500	1	chr1_193398775	Lpgat1	0	193399125	193399325	193399212	29	189	26.3
1	194220425	194224300	1	chr1_194220425	Hhat	0	194223575	194223775	194223712	24	150	19.4
1	194570900	194571800	1	chr1_194570900	Sertad4	0	194571075	194571300	194571137	20	157	22.8
1	195432125	195433200	1	chr1_195432125	mmu-mir-205	0	195432800	195433225	195432987	66	708	43
1	196701150	196702725	1	chr1_196701150	mmu-mir-29b-2	0	196701825	196702175	196701987	35	347	38.4
3	6157025	6157800	1	chr3_6157025	Pxmp3	0	6156775	6157225	6157062	46	558	45.2
3	7492600	7493450	1	chr3_7492600	3110050N22Rik	0	7493250	7493350	7493312	21	77	12.7
3	8991800	8993325	1	chr3_8991800	Tpd52	0	8991475	8992025	8991862	63	722	90.5
3	9309375	9310300	1	chr3_9309375	Zfp704	0	9309800	9310000	9309887	25	170	20.2
3	9625700	9631525	1	chr3_9625700	Zfp704	0	9629400	9629525	9629412	20	85	14.7
3	9636750	9638950	1	chr3_9636750	Zfp704	0	9637600	9637875	9637687	34	291	25.4
3	10335925	10337850	1	chr3_10335925	Zfand1	0	10336625	10336925	10336762	20	205	33.7
3	10356725	10358500	1	chr3_10356725	Chmp4c	0	10358175	10358325	10358287	15	85	7.7
3	10898825	10900600	1	chr3_10898825	Snx16	0	10899725	10899875	10899787	18	93	5.3
3	14597875	14598200	1	chr3_14597875	1810022K09Rik	0	14598050	14598275	14598087	18	140	19.7
3	14624475	14626375	1	chr3_14624475	Car13	0	14625425	14625800	14625612	27	307	34.6
3	14936100	14936725	1	chr3_14936100	Car2	0	14936450	14936725	14936562	29	244	28.2
3	17050650	17051150	1	chr3_17050650	Ythdf3	0	17051125	17051375	17051237	26	219	25.8
3	18042175	18042800	1	chr3_18042175	mmu-mir-124-2	0	18042150	18042475	18042287	19	214	11.9
3	18048925	18049475	1	chr3_18048925	mmu-mir-124-2	0	18049100	18049375	18049237	23	179	14.1
3	18531175	18531900	1	chr3_18531175	Cyp7b1	0	18531275	18531700	18531487	40	462	37.1
3	22057725	22058750	1	chr3_22057725	Tbl1xr1	0	22057775	22057950	22057862	19	107	12.1
3	22224500	22226725	1	chr3_22224500	Tbl1xr1	0	22225450	22225650	22225537	23	167	22.5
3	22332350	22336750	1	chr3_22332350	Tbl1xr1	0	22334300	22334350	22334337	15	29	5.6
3	25642700	25643800	1	chr3_25642700	Nlgn1	0	25643425	25643725	25643587	37	316	15.6
3	27380875	27383125	1	chr3_27380875	Aadacl1	0	27382000	27382200	27382062	24	163	21.2
3	28408075	28409025	1	chr3_28408075	Pld1	0	28408125	28408350	28408237	35	249	26
3	30264625	30265325	1	chr3_30264625	Evi1	0	30264725	30264950	30264837	22	169	11.5
3	30885350	30887625	1	chr3_30885350	Lrrc34	0	30886800	30886850	30886812	13	26	3.1
3	31078725	31082025	1	chr3_31078725	Phc3	0	31079900	31080325	31080087	101	990	46.4
3	31596925	31597075	1	chr3_31596925	Slc7a14	0	31596900	31597000	31596912	14	54	5.9
3	34636350	34637150	1	chr3_34636350	Sox2	0	34636950	34637125	34636987	18	101	18.7
3	35104175	35105125	1	chr3_35104175	Sox2	0	35104400	35104450	35104412	13	26	2.9
3	38166975	38167375	1	chr3_38166975	EG381438	0	38166925	38167200	38167037	30	230	26.1
3	45342100	45343425	1	chr3_45342100	Pcdh10	0	45342925	45343150	45343037	25	196	14.9
3	48164475	48164975	1	chr3_48164475	Pcdh18	0	48164875	48165175	48165012	30	287	25.1
3	50969325	50970775	1	chr3_50969325	Ccrn4l	0	50970325	50970600	50970462	33	276	30.4
3	52060425	52061000	1	chr3_52060425	Maml3	0	52060550	52060700	52060562	17	94	16.9
3	52471075	52471850	1	chr3_52471075	Foxo1	0	52471625	52471700	52471687	15	44	8.5
3	52474100	52474425	1	chr3_52474100	Foxo1	0	52474400	52474525	52474437	20	94	17.5
3	52650950	52651000	1	chr3_52650950	Foxo1	0	52650800	52651000	52650862	27	189	29.7
3	53509900	53511550	1	chr3_53509900	8030451K01Rik	0	53510675	53510800	53510687	15	71	9.2
3	53664025	53665150	1	chr3_53664025	Frem2	0	53664350	53664400	53664387	16	31	5
3	53956325	53957450	1	chr3_53956325	Ufm1	0	53957275	53957600	53957412	51	458	21.9
3	57375800	57376100	1	chr3_57375800	Tm4sf1	0	57376100	57376225	57376137	16	79	14.9
3	58624400	58624925	1	chr3_58624400	D3Ertd194e	0	58624575	58624800	58624662	28	203	24.2
3	59416775	59417000	1	chr3_59416775	P2ry12	0	59416975	59417050	59416987	18	49	8
3	60943850	60944250	1	chr3_60943850	P2ry1	0	60943700	60944050	60943862	39	367	30.2
3	61904350	61905400	1	chr3_61904350	Rap2b	0	61904725	61905150	61904887	38	403	35.2
3	63025725	63026575	1	chr3_63025725	Gpr149	0	63026475	63027000	63026737	97	1250	29.2
3	63923175	63923425	1	chr3_63923175	Plch1	0	63923125	63923175	63923137	15	29	5.2
3	65948900	65950100	1	chr3_65948900	Ccnl1	0	65949425	65949450	65949437	14	14	2.7
3	68318900	68319650	1	chr3_68318900	Schip1	0	68318925	68319075	68319062	15	85	7.7
3	68907825	68908975	1	chr3_68907825	Il12a	0	68908150	68908300	68908237	17	94	10.9
3	79123900	79125575	1	chr3_79123900	Rapgef2	0	79124925	79125000	79124937	14	42	8.2
3	79503225	79503400	1	chr3_79503225	Ppid	0	79502925	79503225	79503087	65	562	52.9
3	79519700	79522525	1	chr3_79519700	Ppid	0	79520925	79521200	79521087	46	376	37.7
3	82975075	82975100	1	chr3_82975075	Lrat	0	82974950	82975075	82974962	14	67	5.3
3	83668475	83669325	1	chr3_83668475	Sfrp2	0	83668700	83669450	83669262	37	653	80.4
3	84663300	84664025	1	chr3_84663300	Arfip1	0	84663375	84663625	84663537	25	197	25.1
3	84906050	84907125	1	chr3_84906050	Fbxw7	0	84906825	84907025	84906937	18	122	15.4
3	85423625	85425325	1	chr3_85423625	mmu-mir-466k	0	85424150	85424425	85424287	45	349	35.9
3	85918025	85919225	1	chr3_85918025	Glt28d2	0	85918750	85919075	85918937	39	365	38.4
3	86778075	86779600	1	chr3_86778075	Mab21l2	0	86778725	86779000	86778887	41	325	45.1
3	89911925	89912925	1	chr3_89911925	She	0	89912300	89912700	89912437	55	590	46.2
3	93516800	93517200	1	chr3_93516800	Tchhl1	0	93517200	93517400	93517312	22	153	22.2
3	94392050	94392750	1	chr3_94392050	Them4	0	94392425	94392650	94392537	21	158	12.4
3	94686750	94687625	1	chr3_94686750	Snx27	0	94687300	94687425	94687387	16	73	11.9
3	96818875	96820475	1	chr3_96818875	Zfp364	0	96819450	96819675	96819537	32	231	22.3
3	97624800	97626775	1	chr3_97624800	Chd1l	0	97625600	97625925	97625762	60	505	39.8
3	97896075	97897775	1	chr3_97896075	Pde4dip	0	97896725	97897000	97896862	49	409	45
3	102177950	102179800	1	chr3_102177950	Casq2	0	102178575	102178700	102178587	16	78	11.7
3	102184075	102185200	1	chr3_102184075	Casq2	0	102184900	102185425	102185087	30	407	62.6
3	102734025	102735725	1	chr3_102734025	Tspan2	0	102734325	102734675	102734512	74	654	45.7
3	103979375	103980525	1	chr3_103979375	Ptpn22	0	103979650	103979700	103979687	16	30	4.6
3	104938750	104940900	1	chr3_104938750	Mov10	0	104940500	104940525	104940512	15	15	2.9
3	107867775	107870525	1	chr3_107867775	Csf1	0	107868950	107869000	107868987	17	33	6.1
3	109696500	109697500	1	chr3_109696500	Vav3	0	109696625	109696700	109696637	14	41	7.7
3	116715900	116716875	1	chr3_116715900	Slc35a3	0	116716825	116716850	116716837	13	13	2
3	119119975	119120500	1	chr3_119119975	Dpyd	0	119120100	119120325	119120162	23	167	15.9
3	121013100	121014050	1	chr3_121013100	2510027J23Rik	0	121013250	121013400	121013262	13	78	8
3	121534375	121536050	1	chr3_121534375	Slc44a3	0	121534850	121535050	121534987	30	185	17.9
3	121609600	121611225	1	chr3_121609600	Slc44a3	0	121610275	121610325	121610287	16	31	5.7
3	121987050	121988350	1	chr3_121987050	Arhgap29	0	121987250	121987575	121987362	36	381	57.4
3	122009800	122011650	1	chr3_122009800	Abca4	0	122010150	122010275	122010187	15	71	12.4
3	122398525	122399400	1	chr3_122398525	Bcar3	0	122398650	122398700	122398662	13	26	4.6
3	122557250	122557500	1	chr3_122557250	Fnbp1l	0	122557475	122557500	122557487	15	15	2.9
3	123287100	123289100	1	chr3_123287100	Sec24d	0	123288325	123288500	123288437	17	98	15.6
3	126440650	126441650	1	chr3_126440650	Arsj	0	126441600	126441900	126441737	41	330	42.6
3	127456425	127456725	1	chr3_127456425	mmu-mir-302b	0	127456325	127456550	127456437	34	240	19.7
3	129230625	129231125	1	chr3_129230625	Pitx2	0	129231100	129231175	129231112	18	49	6.4
3	130056400	130057475	1	chr3_130056400	Sec24b	0	130056725	130056750	130056737	18	18	3.5
3	130985850	130986375	1	chr3_130985850	Lef1	0	130986225	130986250	130986237	14	14	2.8
3	131106775	131108100	1	chr3_131106775	Lef1	0	131107175	131107250	131107187	13	39	5.6
3	131131850	131133625	1	chr3_131131850	Lef1	0	131133425	131133675	131133562	32	248	33.8
3	131328300	131328600	1	chr3_131328300	Sgms2	0	131328475	131328550	131328537	18	49	8.8
3	131458575	131459175	1	chr3_131458575	Papss1	0	131458700	131458750	131458712	19	37	7.1
3	131564300	131565875	1	chr3_131564300	Papss1	0	131564900	131565075	131564987	20	123	15.4
3	134074275	134074575	1	chr3_134074275	Cxxc4	0	134074425	134074675	134074537	26	204	15.8
3	136052825	136052975	1	chr3_136052825	Bank1	0	136052975	136053500	136053312	79	996	46.5
3	137579900	137580050	1	chr3_137579900	Ddit4l	0	137580000	137580200	137580112	24	164	23.2
3	137978350	137980625	1	chr3_137978350	EG329763	0	137979175	137979475	137979337	54	462	39.9
3	138612275	138614375	1	chr3_138612275	Tspan5	0	138613375	138613500	138613437	15	67	10.5
3	138629350	138630100	1	chr3_138629350	Tspan5	0	138629750	138630100	138629912	61	543	30.3
3	138670425	138671000	1	chr3_138670425	Tspan5	0	138670575	138670700	138670612	16	73	8.5
3	138959925	138961950	1	chr3_138959925	Rap1gds1	0	138961075	138961125	138961087	14	28	5.6
3	142823925	142824750	1	chr3_142823925	Pkn2	0	142824425	142824600	142824487	21	118	15.5
3	144350475	144351475	1	chr3_144350475	Hs2st1	0	144350325	144350775	144350537	80	841	44.5
3	144358925	144359925	1	chr3_144358925	Hs2st1	0	144359200	144359525	144359362	45	393	34.9
3	144914975	144915900	1	chr3_144914975	Clca6	0	144915100	144915325	144915212	33	228	27.5
3	144955250	144956075	1	chr3_144955250	Clca3	0	144955300	144955550	144955412	33	265	23.3
3	146363225	146364000	1	chr3_146363225	Ssx2ip	0	146363900	146364050	146363987	14	80	10.5
3	147234000	147235725	1	chr3_147234000	Prkacb	0	147235525	147235850	147235662	62	567	51.7
3	147901850	147902600	1	chr3_147901850	Lphn2	0	147901800	147901900	147901837	14	55	5.9
3	148616175	148617350	1	chr3_148616175	Lphn2	0	148616650	148616850	148616662	15	116	17
3	149189575	149190375	1	chr3_149189575	Lphn2	0	149189425	149189775	149189662	24	262	34.6
3	154315550	154318100	1	chr3_154315550	Lhx8	0	154316850	154317175	154317012	63	538	39.2
3	154483200	154484200	1	chr3_154483200	Cryz	0	154483050	154483450	154483312	66	637	57.1
3	154712125	154713850	1	chr3_154712125	Tyw3	0	154712425	154712600	154712487	20	124	17.6
2	5136300	5138125	1	chr2_5136300	Ccdc3	0	5137175	5137625	5137412	72	859	27.9
2	5393700	5396125	1	chr2_5393700	Camk1d	0	5394750	5395000	5394862	26	206	21.2
2	5652750	5653925	1	chr2_5652750	Camk1d	0	5653325	5653350	5653337	13	13	2.4
2	5964125	5964425	1	chr2_5964125	5430407P10Rik	0	5964325	5964350	5964337	14	14	2
2	5976400	5978550	1	chr2_5976400	5430407P10Rik	0	5977800	5977950	5977862	16	88	11.5
2	8416800	8416850	1	chr2_8416800	Cugbp2	0	8416200	8416800	8416512	98	1248	81.1
2	9564825	9564950	1	chr2_9564825	Gata3	0	9564800	9565075	9564962	18	173	20.5
2	10252200	10253575	1	chr2_10252200	Sfmbt2	0	10253200	10253350	10253212	22	109	16.1
2	10308000	10309175	1	chr2_10308000	Sfmbt2	0	10308650	10308950	10308812	39	343	33.4
2	11488750	11490075	1	chr2_11488750	Rbm17	0	11488900	11489125	11489012	33	252	25.8
2	13685575	13686775	1	chr2_13685575	St8sia6	0	13685675	13686000	13685862	35	341	27.2
2	17770650	17770700	1	chr2_17770650	Nebl	0	17770475	17770675	17770637	30	198	34.1
2	18934000	18935900	1	chr2_18934000	Pip5k2a	0	18935875	18936100	18935987	34	253	11.2
2	20402825	20404850	1	chr2_20402825	BC026657	0	20403950	20404175	20404037	26	184	24.9
2	20565425	20585575	1	chr2_20565425	Arhgap21	0	20583475	20583650	20583537	24	159	30.9
2	21881150	21881825	1	chr2_21881150	Myo3a	0	21881800	21882000	21881937	36	223	32.3
2	23821700	23822125	1	chr2_23821700	Hnmt	0	23822075	23822275	23822212	17	119	18.4
2	24263775	24266275	1	chr2_24263775	Pax8	0	24265400	24265550	24265462	19	101	13.8
2	24733025	24735300	1	chr2_24733025	Ehmt1	0	24734250	24734600	24734387	90	796	42
2	25201350	25202500	1	chr2_25201350	2010317E24Rik	0	25202375	25202450	25202437	16	44	7.3
2	25901375	25901950	1	chr2_25901375	Btbd14a	0	25901425	25901800	25901612	45	458	38.1
2	26016225	26018625	1	chr2_26016225	Lhx3	0	26017225	26017325	26017287	17	64	10.5
2	29373675	29375650	1	chr2_29373675	Rapgef1	0	29374200	29374350	29374287	18	89	11.6
2	33178825	33179900	1	chr2_33178825	Ralgps1	0	33179450	33179500	33179462	14	28	5.3
2	33611350	33612350	1	chr2_33611350	2610528K11Rik	0	33611375	33611500	33611387	13	63	8.2
2	34221425	34222425	1	chr2_34221425	Pbx3	0	34221475	34221850	34221662	98	903	40.9
2	34741575	34746950	1	chr2_34741575	Phf19	0	34743425	34743625	34743587	23	163	21.1
2	34757775	34760975	1	chr2_34757775	Phf19	0	34759500	34759700	34759587	25	174	15.9
2	35662575	35663625	1	chr2_35662575	Ttll11	0	35663175	35663300	35663237	20	88	16.1
2	35665300	35668325	1	chr2_35665300	Ttll11	0	35667825	35668150	35667962	37	341	30.7
2	36020025	36021525	1	chr2_36020025	Ptgs1	0	36020675	36021000	36020812	45	425	40.6
2	43188125	43188475	1	chr2_43188125	Kynu	0	43187800	43188275	43188012	89	973	36.2
2	44346350	44347275	1	chr2_44346350	Gtdc1	0	44347225	44347875	44347537	199	2638	92.3
2	44348100	44348500	1	chr2_44348100	Gtdc1	0	44348450	44348750	44348612	27	224	34.6
2	44651750	44652025	1	chr2_44651750	Gtdc1	0	44651750	44652075	44651912	35	330	36
2	44926200	44927075	1	chr2_44926200	Zfhx1b	0	44926625	44926775	44926712	19	92	15.8
2	45047050	45047575	1	chr2_45047050	Zfhx1b	0	45047475	45047700	45047637	32	240	31
2	49193350	49194925	1	chr2_49193350	Epc2	0	49193650	49193925	49193762	39	320	26
2	50860575	50861525	1	chr2_50860575	Rnd3	0	50860775	50860950	50860837	19	121	20.5
2	50909300	50910550	1	chr2_50909300	Rnd3	0	50910000	50910125	50910087	19	86	15.5
2	51574450	51576400	1	chr2_51574450	Tas2r134	0	51575600	51575875	51575737	34	295	32.3
2	52736325	52738950	1	chr2_52736325	Fmnl2	0	52737550	52737750	52737637	17	122	15.6
2	58419125	58421600	1	chr2_58419125	Acvr1	0	58420175	58420400	58420262	35	268	30.9
2	59876550	59877800	1	chr2_59876550	Baz2b	0	59876875	59877125	59876987	32	259	27.1
2	59943175	59946625	1	chr2_59943175	Baz2b	0	59945850	59945900	59945862	14	28	3.9
2	59996800	59997750	1	chr2_59996800	2012-03-07	0	59997725	59997950	59997837	43	319	40.9
2	60977625	60978225	1	chr2_60977625	Rbms1	0	60977575	60977775	60977687	18	121	20
2	64838600	64839675	1	chr2_64838600	Grb14	0	64838425	64838750	64838587	30	312	28.8
2	68185300	68187575	1	chr2_68185300	Stk39	0	68186925	68187150	68187012	31	210	28.9
2	68618775	68620525	1	chr2_68618775	Lass6	0	68620025	68620200	68620112	22	125	22.3
2	68767525	68768500	1	chr2_68767525	Lass6	0	68768275	68768325	68768287	17	34	6.1
2	69336350	69337325	1	chr2_69336350	Lrp2	0	69336950	69337000	69336987	22	43	8.5
2	70078925	70080850	1	chr2_70078925	Sp5	0	70079525	70079975	70079762	78	944	67.9
2	70598725	70601825	1	chr2_70598725	Tlk1	0	70599000	70599025	70599012	13	13	2.5
2	70630500	70632225	1	chr2_70630500	Tlk1	0	70631550	70631825	70631737	36	289	40.1
2	71425100	71427500	1	chr2_71425100	Dlx2	0	71426050	71426100	71426062	13	26	3.2
2	71819725	71820000	1	chr2_71819725	Rapgef4	0	71819700	71819950	71819862	36	283	33.2
2	73874175	73875225	1	chr2_73874175	Atp5g3	0	73874325	73874475	73874387	18	92	7
2	75830000	75831650	1	chr2_75830000	4930506L13Rik	0	75831225	75831300	75831262	16	47	8.9
2	76200975	76202625	1	chr2_76200975	Osbpl6	0	76201050	76201250	76201187	27	169	21.8
2	76812475	76814000	1	chr2_76812475	Ttn	0	76812950	76813275	76813112	41	372	16.8
2	76820225	76821000	1	chr2_76820225	Ttn	0	76820150	76820300	76820187	15	84	3.2
2	76859275	76861550	1	chr2_76859275	Ttn	0	76860475	76860775	76860587	60	503	36.6
2	77134250	77134425	1	chr2_77134250	Sestd1	0	77134425	77134625	77134487	23	139	24.2
2	77217200	77219125	1	chr2_77217200	Zfp385b	0	77218250	77218475	77218387	21	155	22.6
2	77554200	77555125	1	chr2_77554200	Zfp385b	0	77554250	77554275	77554262	13	13	1.4
2	79367650	79368575	1	chr2_79367650	Ssfa2	0	79367575	79367775	79367637	24	158	22.2
2	79984950	79985925	1	chr2_79984950	Pde1a	0	79985125	79985300	79985212	19	108	14.9
2	84562000	84564300	1	chr2_84562000	Serping1	0	84563150	84563450	84563287	60	486	34.8
2	87316500	87316800	1	chr2_87316500	Pramel6	0	87316550	87316825	87316687	25	222	16.9
2	90508500	90509825	1	chr2_90508500	Nup160	0	90509375	90509725	90509537	33	345	21.6
2	93727650	93728725	1	chr2_93727650	Gm1967	0	93728500	93728925	93728737	94	887	51.3
2	101466275	101467350	1	chr2_101466275	Traf6	0	101467025	101467225	101467087	23	161	28.1
2	101523025	101524900	1	chr2_101523025	Traf6	0	101523750	101524050	101523912	65	522	32.1
2	101761450	101763475	1	chr2_101761450	Commd9	0	101762300	101762400	101762312	13	49	5.4
2	101910825	101912400	1	chr2_101910825	Ldlrad3	0	101911150	101911400	101911312	21	185	32.3
2	102204775	102205025	1	chr2_102204775	Trim44	0	102204950	102205150	102205037	24	164	20.9
2	103110950	103113875	1	chr2_103110950	Ehf	0	103111625	103111750	103111687	18	84	15.6
2	103161575	103162825	1	chr2_103161575	Ehf	0	103161625	103161875	103161737	25	199	29.7
2	103899625	103900850	1	chr2_103899625	Cd59a	0	103899800	103899950	103899887	19	99	13.3
2	104020650	104022125	1	chr2_104020650	A930018P22Rik	0	104020975	104021275	104021162	46	396	31
2	104656075	104657650	1	chr2_104656075	Prrg4	0	104656700	104657000	104656812	64	541	41.9
2	105412000	105412250	1	chr2_105412000	Pax6	0	105412025	105412175	105412062	23	121	21.6
2	105492475	105494950	1	chr2_105492475	Pax6	0	105491950	105492500	105492187	57	813	80.6
2	106265625	106267200	1	chr2_106265625	C130023O10Rik	0	106266650	106266900	106266787	27	212	17.9
2	106361525	106362425	1	chr2_106361525	C130023O10Rik	0	106362250	106362700	106362537	54	614	59.5
2	106478025	106478675	1	chr2_106478025	C130023O10Rik	0	106478375	106478675	106478512	28	249	37.7
2	106520925	106521925	1	chr2_106520925	C130023O10Rik	0	106521225	106521425	106521312	27	172	25.1
2	106551300	106552750	1	chr2_106551300	C130023O10Rik	0	106551675	106552075	106551887	86	800	39.5
2	106656825	106657850	1	chr2_106656825	C130023O10Rik	0	106657475	106657675	106657562	25	175	29
2	109742400	109743375	1	chr2_109742400	Lgr4	0	109742975	109743275	109743087	47	416	52.5
2	109743750	109746625	1	chr2_109743750	Lgr4	0	109743950	109744425	109744212	179	1744	50.7
2	115295850	115296325	1	chr2_115295850	BC052040	0	115295950	115295975	115295962	14	14	2.4
2	115671525	115673000	1	chr2_115671525	Mrg1	0	115672725	115672925	115672787	20	140	22.3
2	116639950	116642450	1	chr2_116639950	Tmco5	0	116641550	116641750	116641712	18	126	18
2	119553275	119554650	1	chr2_119553275	Mga	0	119554300	119554525	119554337	21	164	13.5
2	121332875	121334500	1	chr2_121332875	Wdr76	0	121334450	121334850	121334662	43	460	19.4
2	124095375	124096475	1	chr2_124095375	Sema6d	0	124096100	124096400	124096287	24	235	23.9
2	127952675	127954075	1	chr2_127952675	Bcl2l11	0	127953100	127953250	127953137	15	87	9.2
2	128064350	128066250	1	chr2_128064350	Bcl2l11	0	128065225	128065400	128065287	20	118	15.6
2	128504250	128505650	1	chr2_128504250	Tmem87b	0	128504625	128504650	128504637	14	14	2.7
2	129384800	129389000	1	chr2_129384800	Pdyn	0	129387300	129387550	129387437	54	437	41.2
2	130889125	130890500	1	chr2_130889125	Cdc25b	0	130889800	130889925	130889912	21	88	15.5
2	131734850	131736800	1	chr2_131734850	Rassf2	0	131736150	131736350	131736262	24	168	19.8
2	131824850	131826950	1	chr2_131824850	Slc23a2	0	131824850	131825125	131824987	38	317	31.3
2	131842150	131843975	1	chr2_131842150	Slc23a2	0	131842625	131842900	131842812	40	331	40.9
2	132340825	132341750	1	chr2_132340825	Prei4	0	132340800	132341025	132340887	21	150	21.2
2	134651500	134653775	1	chr2_134651500	Plcb1	0	134651925	134652375	134652112	146	1455	70.2
2	134763650	134764125	1	chr2_134763650	Plcb1	0	134763925	134764300	134764112	84	767	43
2	134764600	134765700	1	chr2_134764600	Plcb1	0	134764675	134764700	134764687	13	13	2.5
2	135305450	135306450	1	chr2_135305450	Plcb4	0	135306175	135306600	135306362	59	597	58.2
2	135547575	135548575	1	chr2_135547575	Plcb4	0	135548375	135548550	135548412	19	113	12.6
2	136481425	136482150	1	chr2_136481425	Snap25	0	136482100	136482150	136482112	14	27	2.1
2	136782950	136784950	1	chr2_136782950	Jag1	0	136783925	136784100	136784037	20	119	16.1
2	142809000	142809150	1	chr2_142809000	Otor	0	142808975	142809300	142809137	33	345	34.2
2	143370675	143371850	1	chr2_143370675	Pcsk2	0	143371075	143371125	143371112	14	27	5.3
2	143614750	143616650	1	chr2_143614750	Dstn	0	143615725	143615825	143615787	17	66	12.1
2	143848575	143848625	1	chr2_143848575	Snx5	0	143848425	143849000	143848512	33	522	84.1
2	145752100	145753950	1	chr2_145752100	4930529M08Rik	0	145753950	145754450	145754212	107	1335	108.4
2	146092125	146092500	1	chr2_146092125	A230067G21Rik	0	146092200	146092500	146092312	43	367	35.5
2	146514900	146515825	1	chr2_146514900	Gm114	0	146514850	146515150	146514987	51	463	40.2
2	146612200	146613100	1	chr2_146612200	Gm114	0	146612600	146612900	146612762	44	354	36.7
2	146724750	146725775	1	chr2_146724750	Xrn2	0	146724525	146724875	146724687	61	571	36.4
2	146881025	146882050	1	chr2_146881025	Nkx2-2	0	146881050	146881250	146881162	33	229	26.4
2	146984600	146985775	1	chr2_146984600	Pax1	0	146984325	146984725	146984537	41	446	17.2
2	149490075	149491050	1	chr2_149490075	OTTMUSG00000015750	0	149489950	149490450	149490187	35	515	45
2	149631275	149632725	1	chr2_149631275	OTTMUSG00000015750	0	149631100	149631325	149631212	37	272	27.5
2	153061000	153063750	1	chr2_153061000	Asxl1	0	153062275	153062650	153062487	109	999	30.9
2	154913550	154914600	1	chr2_154913550	Dynlrb1	0	154913700	154914000	154913837	44	376	25.4
2	156877050	156879400	1	chr2_156877050	Rbl1	0	156877950	156878300	156878162	58	527	36.9
2	157658300	157660400	1	chr2_157658300	2610036D13Rik	0	157659475	157659650	157659512	18	112	21.1
2	159109950	159110950	1	chr2_159109950	Dhx35	0	159109900	159110225	159110062	51	431	23.9
2	159801775	159802725	1	chr2_159801775	Gm826	0	159802725	159803050	159802862	51	476	15.6
2	160051400	160052925	1	chr2_160051400	Mafb	0	160051750	160051950	160051837	39	258	34.2
2	160858175	160858600	1	chr2_160858175	Chd6	0	160858200	160858325	160858262	25	114	20.1
2	161033150	161034550	1	chr2_161033150	Chd6	0	161033225	161033250	161033237	13	13	2.4
2	163573775	163575425	1	chr2_163573775	Kcnk15	0	163574850	163575000	163574912	18	97	13.5
2	165433250	165434600	1	chr2_165433250	Eya2	0	165433400	165433500	165433437	15	56	5
2	165490300	165493575	1	chr2_165490300	Prkcbp1	0	165491550	165491625	165491612	16	44	6.7
2	165667175	165668725	1	chr2_165667175	Ncoa3	0	165668175	165668400	165668262	26	198	27.1
2	166890300	166890950	1	chr2_166890300	Kcnb1	0	166890350	166890450	166890362	14	55	7.3
2	167881525	167893275	1	chr2_167881525	Adnp	0	167887100	167887275	167887162	23	143	24.6
2	167904450	167906350	1	chr2_167904450	Adnp	0	167905275	167905600	167905462	72	660	56.8
2	168983800	168985700	1	chr2_168983800	mmu-mir-297a-6	0	168984700	168984950	168984787	40	318	37.8
2	169418800	169420600	1	chr2_169418800	Tshz2	0	169419700	169419975	169419812	25	220	31
2	169550875	169551350	1	chr2_169550875	Tshz2	0	169550750	169550950	169550837	23	158	14.9
2	169579425	169580350	1	chr2_169579425	Zfp217	0	169579275	169579550	169579437	32	253	28.8
2	170461825	170463225	1	chr2_170461825	Dok5	0	170463200	170463775	170463537	124	1635	118.3
2	170465975	170468900	1	chr2_170465975	Dok5	0	170466850	170467125	170466937	36	312	43.4
2	171438400	171439350	1	chr2_171438400	Cbln4	0	171438400	171438625	171438487	21	163	10.1
2	171569450	171570350	1	chr2_171569450	Cbln4	0	171570350	171570775	171570587	46	437	24.9
2	172407500	172409325	1	chr2_172407500	Tcfap2c	0	172408300	172408500	172408387	38	249	29.9
2	173694200	173695600	1	chr2_173694200	Stx16	0	173694175	173694425	173694287	30	250	21.9
2	173876575	173876925	1	chr2_173876575	mmu-mir-296	0	173876475	173876600	173876487	14	69	11.7
2	174307450	174309150	1	chr2_174307450	Rp23-45p4.1	0	174308450	174308625	174308487	29	180	22.5
2	179507675	179510725	1	chr2_179507675	Cdh4	0	179510025	179510100	179510037	15	45	6.7
2	179721325	179722800	1	chr2_179721325	Taf4a	0	179721625	179721850	179721737	26	195	20.9
2	179918300	179918975	1	chr2_179918300	Taf4a	0	179918625	179918900	179918737	40	312	18.6
2	180276450	180276750	1	chr2_180276450	Gata5	0	180276650	180276675	180276662	15	15	2.2
2	180697125	180697850	1	chr2_180697125	Bhlhb4	0	180697075	180697275	180697187	24	152	13
2	181261775	181263000	1	chr2_181261775	Rtel1	0	181261950	181262250	181262137	33	281	30
5	3338800	3339475	1	chr5_3338800	Cdk6	0	3339125	3339200	3339137	13	39	1.5
5	3473400	3475100	1	chr5_3473400	5830415L20Rik	0	3474250	3474550	3474362	35	324	14.9
5	4113400	4113475	1	chr5_4113400	Cyp51	0	4113250	4113400	4113262	15	89	12.7
5	4307700	4310975	1	chr5_4307700	LOC208595	0	4309500	4310025	4309812	92	1144	77.4
5	5704425	5705900	1	chr5_5704425	Steap2	0	5704875	5705225	5705037	48	458	33.8
5	5706425	5707350	1	chr5_5706425	Steap2	0	5706600	5706775	5706662	15	97	11.2
5	9697075	9697125	1	chr5_9697075	Grm3	0	9697025	9697075	9697037	14	28	4.9
5	12572575	12573125	1	chr5_12572575	Sema3d	0	12572700	12572875	12572737	15	99	13.7
5	13987400	13990425	1	chr5_13987400	Sema3e	0	13988025	13988850	13988587	115	1459	126.7
5	14038025	14038275	1	chr5_14038025	Sema3e	0	14037850	14038250	14038137	35	393	58.2
5	15856975	15857475	1	chr5_15856975	Hgf	0	15857250	15857450	15857337	23	159	17.5
5	19837000	19837600	1	chr5_19837000	Magi2	0	19837200	19837475	19837337	48	373	26.5
5	20474900	20477150	1	chr5_20474900	Rsbn1l	0	20476275	20476575	20476412	50	405	29.6
5	20484675	20485950	1	chr5_20484675	Rsbn1l	0	20485725	20486100	20485962	53	525	43.2
5	21161750	21165075	1	chr5_21161750	Armc10	0	21163650	21164025	21163862	50	514	36.3
5	21244025	21244975	1	chr5_21244025	Pmpcb	0	21244025	21244300	21244162	40	353	39.1
5	22761550	22763650	1	chr5_22761550	Srpk2	0	22762450	22762600	22762462	19	102	18
5	22913150	22914250	1	chr5_22913150	Srpk2	0	22913075	22913550	22913437	32	339	45.4
5	27001750	27002975	1	chr5_27001750	Dpp6	0	27002350	27002600	27002462	25	203	26.5
5	27130950	27131300	1	chr5_27130950	Dpp6	0	27131225	27131525	27131387	34	291	20.9
5	27303425	27304200	1	chr5_27303425	B930011P16Rik	0	27304125	27304300	27304237	17	104	8.9
5	27372775	27373825	1	chr5_27372775	B930011P16Rik	0	27373225	27373400	27373362	18	111	14.2
5	28506650	28508725	1	chr5_28506650	En2	0	28507325	28507675	28507512	65	571	39.4
5	28563100	28563125	1	chr5_28563100	Cnpy1	0	28562900	28563250	28563062	71	606	31.8
5	29584700	29585275	1	chr5_29584700	Rnf32	0	29584775	29584950	29584812	19	109	11.6
5	32714575	32714825	1	chr5_32714575	Ppp1cb	0	32714375	32714925	32714562	44	535	40.5
5	33351250	33352475	1	chr5_33351250	Ywhah	0	33351875	33352025	33351962	28	145	21.4
5	37521050	37522525	1	chr5_37521050	Crmp1	0	37521300	37521450	37521387	24	120	16.8
5	38989750	38991275	1	chr5_38989750	6820424L24Rik	0	38990500	38990625	38990537	16	73	13.4
5	39041050	39042500	1	chr5_39041050	6820424L24Rik	0	39041075	39041350	39041212	42	358	35.1
5	46294000	46295000	1	chr5_46294000	Lcorl	0	46293975	46294175	46294112	22	144	11.9
5	53311375	53312700	1	chr5_53311375	Slc34a2	0	53312025	53312400	53312212	52	541	52
5	53793275	53796500	1	chr5_53793275	Rbpsuh	0	53794050	53794225	53794112	22	134	20.1
5	53853825	53859525	1	chr5_53853825	Rbpsuh	0	53859050	53859075	53859062	14	14	2
5	53999125	53999975	1	chr5_53999125	Cckar	0	53999650	53999875	53999787	21	161	16.9
5	64272625	64273425	1	chr5_64272625	AA536743	0	64273050	64273350	64273187	40	345	42.9
5	64453475	64454750	1	chr5_64453475	Tbc1d1	0	64454150	64454175	64454162	13	13	2.4
5	64532625	64534525	1	chr5_64532625	Tbc1d1	0	64533425	64533575	64533487	16	85	13
5	64866800	64867675	1	chr5_64866800	Klf3	0	64867325	64867375	64867337	13	26	5
5	64875125	64877100	1	chr5_64875125	Klf3	0	64876625	64876850	64876687	34	251	35.1
5	64944000	64944775	1	chr5_64944000	Klf3	0	64944375	64944400	64944387	13	13	2.4
5	65005825	65006900	1	chr5_65005825	Klf3	0	65006200	65006375	65006337	25	140	24.9
5	65155800	65157975	1	chr5_65155800	Tlr1	0	65156800	65156900	65156812	18	63	10.2
5	65245750	65246250	1	chr5_65245750	9130005N14Rik	0	65245825	65246100	65245937	28	220	27.2
5	65720625	65720675	1	chr5_65720625	Ugdh	0	65720600	65720750	65720612	19	102	15.4
5	66686050	66688300	1	chr5_66686050	4921525L17Rik	0	66686525	66686650	66686562	19	89	12.8
5	67000025	67001100	1	chr5_67000025	3732412D22Rik	0	67000125	67000425	67000287	34	300	37.1
5	67417700	67418700	1	chr5_67417700	Phox2b	0	67417675	67418175	67417862	74	882	73
5	67911675	67912525	1	chr5_67911675	D830007B15Rik	0	67912250	67912850	67912637	100	1343	87.1
5	72744200	72745325	1	chr5_72744200	Corin	0	72743950	72744450	72744212	87	999	66.1
5	73154275	73155475	1	chr5_73154275	Tec	0	73155250	73155450	73155362	23	151	20
5	75234325	75235725	1	chr5_75234325	Chic2	0	75234625	75235025	75234837	164	1489	61.2
5	75280150	75281300	1	chr5_75280150	Chic2	0	75280825	75281250	75280987	74	788	69.3
5	75647175	75647800	1	chr5_75647175	Kit	0	75647525	75647725	75647637	19	133	16.1
5	75819425	75821275	1	chr5_75819425	Kit	0	75820200	75820475	75820337	29	232	25.6
5	77360550	77361700	1	chr5_77360550	Clock	0	77360500	77360850	77360662	75	693	32.8
5	78336925	78336950	1	chr5_78336925	Rest	0	78336875	78337275	78337087	208	1935	75.3
5	78505725	78506900	1	chr5_78505725	Igfbp7	0	78506250	78506450	78506337	20	139	10.3
5	87481900	87482900	1	chr5_87481900	Tmprss11d	0	87481825	87482150	87482012	39	352	20.5
5	90429800	90431425	1	chr5_90429800	Gc	0	90430750	90430800	90430762	14	28	2.5
5	93978325	93981800	1	chr5_93978325	Shroom3	0	93980800	93980900	93980887	15	53	8.8
5	94200375	94204025	1	chr5_94200375	2012-09-11	0	94202425	94202550	94202537	24	108	20.2
5	96798150	96799175	1	chr5_96798150	Fras1	0	96798325	96798600	96798412	25	214	36.9
5	97163200	97163850	1	chr5_97163200	Bmp2k	0	97163450	97163575	97163512	19	85	12
5	97212425	97213475	1	chr5_97212425	Bmp2k	0	97213125	97213300	97213262	23	138	19.1
5	97440850	97441675	1	chr5_97440850	EG433923	0	97440850	97440975	97440887	17	77	8.9
5	99161825	99162300	1	chr5_99161825	Bmp3	0	99161975	99162275	99162162	35	293	13
5	100199675	100200725	1	chr5_100199675	Hnrpd	0	100199600	100199850	100199712	32	254	31.8
5	100575250	100575300	1	chr5_100575250	Lin54	0	100575125	100575275	100575162	24	130	19.8
5	100582700	100584125	1	chr5_100582700	Lin54	0	100583350	100583650	100583462	37	352	34.5
5	102275500	102277250	1	chr5_102275500	Wdfy3	0	102276475	102276775	102276637	32	283	30.2
5	103145800	103146775	1	chr5_103145800	Mapk10	0	103145675	103146025	103145812	34	346	26.3
5	103431650	103432875	1	chr5_103431650	Mapk10	0	103431975	103432000	103431987	13	13	2.4
5	104138675	104138875	1	chr5_104138675	Klhl8	0	104138725	104138925	104138762	26	175	26.3
5	107349475	107351500	1	chr5_107349475	Cdc7	0	107350475	107350550	107350512	14	40	5.2
5	107387925	107388925	1	chr5_107387925	Tgfbr3	0	107388575	107388800	107388637	29	199	22.2
5	108276075	108276200	1	chr5_108276075	Mtf2	0	108276000	108276100	108276062	21	77	14.8
5	108344400	108345050	1	chr5_108344400	Tmed5	0	108344625	108344700	108344687	14	40	5.6
5	111283525	111285875	1	chr5_111283525	mmu-mir-701	0	111284575	111284900	111284737	48	431	42.7
5	111410525	111411000	1	chr5_111410525	Pitpnb	0	111410675	111411000	111410862	52	475	43.2
5	111602850	111605300	1	chr5_111602850	Pitpnb	0	111603975	111604025	111603987	14	27	5.2
5	111995425	111996400	1	chr5_111995425	Mn1	0	111995825	111995925	111995862	23	80	15.1
5	112012625	112014350	1	chr5_112012625	Mn1	0	112013375	112013500	112013462	19	83	12.6
5	112761150	112764450	1	chr5_112761150	Sez6l	0	112761225	112761425	112761287	19	135	14.2
5	114925250	114926575	1	chr5_114925250	Trpv4	0	114925925	114926000	114925987	17	46	7.7
5	115060400	115064650	1	chr5_115060400	2610524H06Rik	0	115062925	115063125	115063012	32	217	32.1
5	115631450	115635025	1	chr5_115631450	Cox6a1	0	115634850	115635200	115635012	38	390	29.6
5	118698375	118701250	1	chr5_118698375	Thrap2	0	118699450	118699600	118699487	23	130	19.7
5	118826950	118833100	1	chr5_118826950	Thrap2	0	118829075	118829200	118829137	20	92	15.5
5	118947325	118949250	1	chr5_118947325	Thrap2	0	118948075	118948425	118948237	29	275	37.6
5	123416875	123420925	1	chr5_123416875	Hpd	0	123418600	123418975	123418787	66	627	41.2
5	126627600	126628075	1	chr5_126627600	Aacs	0	126627325	126627725	126627487	35	393	41.5
5	127044950	127044975	1	chr5_127044950	Slc15a4	0	127044600	127044950	127044787	91	802	55.9
5	127058075	127059025	1	chr5_127058075	Slc15a4	0	127058750	127058775	127058762	13	13	2.2
5	127627375	127630075	1	chr5_127627375	Slc15a4	0	127628075	127628400	127628237	53	474	36.9
5	128580025	128581275	1	chr5_128580025	Tmem132d	0	128580375	128580675	128580512	30	250	14.1
5	129489600	129491425	1	chr5_129489600	Gpr133	0	129490750	129491000	129490837	24	182	19.1
5	129790350	129790525	1	chr5_129790350	Sfrs8	0	129790375	129790625	129790537	26	200	30.9
5	131461700	131463750	1	chr5_131461700	Wbscr17	0	131461850	131462250	131462062	134	1256	54.9
5	132762450	132762475	1	chr5_132762450	Auts2	0	132762275	132762600	132762437	42	390	30.3
5	132809925	132813725	1	chr5_132809925	Auts2	0	132811125	132811525	132811312	95	921	31.4
5	133196525	133197875	1	chr5_133196525	Auts2	0	133196550	133196900	133196687	44	440	48.6
5	133960050	133960725	1	chr5_133960050	Gats	0	133960300	133960625	133960462	59	520	44.8
5	134037775	134039850	1	chr5_134037775	Gats	0	134038900	134039050	134038962	29	160	23.5
5	135538450	135538800	1	chr5_135538450	Baz1b	0	135538450	135538625	135538487	18	115	16.5
5	135914050	135915325	1	chr5_135914050	Rhbdd2	0	135914150	135914375	135914237	28	211	27.5
5	136680150	136682000	1	chr5_136680150	mmu-mir-721	0	136680500	136680725	136680612	27	185	22.8
5	137924525	137927300	1	chr5_137924525	Hrbl	0	137926450	137926625	137926487	14	95	16.8
5	140195625	140198950	1	chr5_140195625	A930017N06Rik	0	140197200	140197525	140197362	31	273	31.8
5	142660625	142664125	1	chr5_142660625	Foxk1	0	142663100	142663300	142663212	22	150	18.2
5	142666275	142668900	1	chr5_142666275	Foxk1	0	142667975	142668100	142668087	16	73	11.6
5	144364800	144367175	1	chr5_144364800	Lmtk2	0	144366325	144366575	144366462	47	340	46.1
5	144604925	144605200	1	chr5_144604925	Baiap2l1	0	144604875	144604950	144604912	19	56	10.1
5	145497950	145499550	1	chr5_145497950	Zfp655	0	145498950	145499000	145498962	13	26	4.9
5	148849050	148850525	1	chr5_148849050	Ubl3	0	148849150	148849350	148849262	21	145	9.4
5	151409825	151411800	1	chr5_151409825	Stard13	0	151409975	151410100	151410037	14	66	9.6
5	151486775	151487775	1	chr5_151486775	Stard13	0	151487100	151487375	151487212	45	354	39.2
5	151497925	151498925	1	chr5_151497925	Stard13	0	151498175	151498400	151498287	26	182	13.4
4	6418150	6419000	1	chr4_6418150	Nsmaf	0	6418350	6418375	6418362	14	14	1
4	8025150	8026050	1	chr4_8025150	Car8	0	8025300	8025550	8025462	28	224	19.6
4	8861900	8862800	1	chr4_8861900	Chd7	0	8861675	8861900	8861737	21	169	19.1
4	8877100	8879250	1	chr4_8877100	Chd7	0	8877200	8877350	8877237	22	119	21.4
4	10238800	10238850	1	chr4_10238800	Gdf6	0	10238825	10238975	10238887	20	104	7.1
4	10958100	10961075	1	chr4_10958100	Plekhf2	0	10960075	10960125	10960087	15	30	5.3
4	12589775	12590725	1	chr4_12589775	C130086A10	0	12590250	12590750	12590487	157	1696	54.6
4	13022600	13023250	1	chr4_13022600	C130086A10	0	13023250	13023550	13023437	48	421	38.7
4	13700325	13700925	1	chr4_13700325	Runx1t1	0	13700775	13701025	13700862	37	284	29.2
4	13781275	13781775	1	chr4_13781275	Runx1t1	0	13781100	13781350	13781212	28	217	20.9
4	16014450	16015575	1	chr4_16014450	Osgin2	0	16015275	16015575	16015412	36	312	25.7
4	19625850	19628050	1	chr4_19625850	Wwp1	0	19627000	19627150	19627112	18	91	11.9
4	19947150	19950600	1	chr4_19947150	Ttpa	0	19949325	19949750	19949537	93	961	32.8
4	24686275	24687050	1	chr4_24686275	F730047E07Rik	0	24686725	24686775	24686737	13	26	3.2
4	26443975	26444700	1	chr4_26443975	Manea	0	26444550	26444725	26444637	35	213	31
4	29135650	29136600	1	chr4_29135650	Epha7	0	29136325	29136775	29136537	73	788	37
4	29259100	29261775	1	chr4_29259100	Epha7	0	29260575	29261050	29260862	92	1025	39.7
4	32486450	32487300	1	chr4_32486450	Bach2	0	32487075	32487325	32487162	24	206	27.5
4	32503450	32506100	1	chr4_32503450	Bach2	0	32505025	32505500	32505312	56	642	27.9
4	32817875	32817925	1	chr4_32817875	Bach2	0	32817850	32818075	32817987	29	203	25.3
4	33914450	33916725	1	chr4_33914450	Rngtt	0	33915225	33915250	33915237	17	17	3.4
4	34151900	34152475	1	chr4_34151900	Cnr1	0	34152425	34152850	34152637	250	2521	67.2
4	35091950	35093700	1	chr4_35091950	Cga	0	35091825	35092100	35091962	29	234	29
4	35392450	35393450	1	chr4_35392450	3110043O21Rik	0	35392700	35392825	35392762	18	80	10.1
4	36579125	36579400	1	chr4_36579125	mmu-mir-876	0	36579125	36579375	36579262	25	190	17.5
4	40376450	40377800	1	chr4_40376450	Aco1	0	40376575	40376800	40376637	21	160	15.4
4	41003525	41006250	1	chr4_41003525	B4galt1	0	41004375	41004425	41004387	15	30	5.7
4	41289125	41290650	1	chr4_41289125	Aqp3	0	41289600	41289975	41289762	54	541	50.8
4	41447900	41449300	1	chr4_41447900	Ubap2	0	41447750	41448075	41447937	34	321	33.9
4	41517900	41518825	1	chr4_41517900	Wdr40a	0	41518250	41518525	41518387	25	196	35.1
4	42919825	42921100	1	chr4_42919825	N28178	0	42920075	42920250	42920187	21	122	21.9
4	45910575	45911500	1	chr4_45910575	1300002K09Rik	0	45910400	45910675	45910537	28	235	22.5
4	46767950	46768800	1	chr4_46767950	Tbc1d2	0	46768175	46768375	46768237	23	148	19.4
4	46832075	46832875	1	chr4_46832075	Tbc1d2	0	46832300	46832575	46832437	30	266	25.8
4	48292425	48293375	1	chr4_48292425	Txndc4	0	48292950	48293275	48293087	61	534	43.9
4	48512725	48513500	1	chr4_48512725	Tex10	0	48512925	48512950	48512937	13	13	2.1
4	48599050	48602250	1	chr4_48599050	Tmeff1	0	48600825	48600975	48600837	33	178	31
4	50641450	50642250	1	chr4_50641450	Ppp3r2	0	50641925	50642200	50642037	26	219	15.9
4	53486100	53490700	1	chr4_53486100	Slc44a1	0	53487000	53487200	53487087	25	162	14.4
4	53810100	53811525	1	chr4_53810100	Tal2	0	53810450	53810775	53810612	44	420	56
4	53869175	53873075	1	chr4_53869175	Tmem38b	0	53869575	53869650	53869637	15	42	7.7
4	54481825	54482050	1	chr4_54481825	Zfp462	0	54481775	54482050	54481862	33	285	26.8
4	54952625	54954475	1	chr4_54952625	Zfp462	0	54953250	54953350	54953262	15	57	9.4
4	55061300	55064325	1	chr4_55061300	Zfp462	0	55061725	55062000	55061912	19	172	27.2
4	56949675	56951075	1	chr4_56949675	Ctnnal1	0	56950550	56950825	56950712	26	226	23.6
4	56990525	56994525	1	chr4_56990525	mmu-mir-32	0	56992500	56992700	56992562	16	114	10.1
4	57521975	57522100	1	chr4_57521975	Ptpn3	0	57521725	57522050	57521887	34	319	9.2
4	58018350	58019400	1	chr4_58018350	D630039A03Rik	0	58018900	58018975	58018912	16	45	7.3
4	59141625	59141925	1	chr4_59141625	Gng10	0	59141325	59141625	59141437	34	301	34.6
4	59266275	59267775	1	chr4_59266275	Ugcg	0	59266600	59266900	59266737	29	252	13.7
4	59279025	59280225	1	chr4_59279025	Ugcg	0	59279925	59280000	59279937	14	42	6.1
4	59514800	59517300	1	chr4_59514800	Rod1	0	59515525	59515725	59515587	20	142	26
4	59651725	59653625	1	chr4_59651725	Rod1	0	59652300	59652425	59652362	17	78	13.7
4	64724900	64725225	1	chr4_64724900	Pappa	0	64724950	64725250	64725062	53	490	32.5
4	71618900	71619650	1	chr4_71618900	Tle1	0	71619250	71619475	71619312	19	149	22.1
4	71631425	71633825	1	chr4_71631425	Tle1	0	71632375	71632775	71632537	86	825	50.8
4	80643575	80644400	1	chr4_80643575	D4Bwg0951e	0	80644375	80644650	80644487	19	165	23.2
4	80922750	80923375	1	chr4_80922750	Mpdz	0	80923225	80923575	80923412	32	305	43
4	81901075	81902300	1	chr4_81901075	Nfib	0	81902075	81902475	81902262	140	1377	48.6
4	81907700	81908850	1	chr4_81907700	Nfib	0	81907950	81908025	81907987	17	48	8.8
4	82013725	82015350	1	chr4_82013725	Nfib	0	82014600	82014875	82014762	23	202	38.7
4	82909425	82912225	1	chr4_82909425	Snapc3	0	82910500	82910725	82910662	26	181	27.4
4	85712150	85714875	1	chr4_85712150	Adamtsl1	0	85713000	85713475	85713237	122	1331	42.5
4	86010275	86010700	1	chr4_86010275	4930500O09Rik	0	86010400	86010475	86010412	13	39	6.4
4	86591175	86591825	1	chr4_86591175	Slc24a2	0	86591275	86591400	86591287	26	107	15.4
4	87305350	87306300	1	chr4_87305350	Mllt3	0	87305625	87305875	87305737	22	174	25.3
4	90854000	90857200	1	chr4_90854000	Elavl2	0	90856075	90856225	90856137	15	81	14.7
4	90939200	90939975	1	chr4_90939200	Elavl2	0	90939825	90940325	90940112	110	1231	42.9
4	94165350	94166125	1	chr4_94165350	mmu-mir-872	0	94165675	94165825	94165737	15	83	14.8
4	98583100	98583825	1	chr4_98583100	Dock7	0	98583600	98583675	98583662	15	41	7.3
4	99159425	99162900	1	chr4_99159425	Foxd3	0	99162275	99162500	99162362	25	174	24.7
4	102566125	102566775	1	chr4_102566125	Insl5	0	102566350	102566375	102566362	13	13	2
4	102744900	102745625	1	chr4_102744900	Slc35d1	0	102744950	102745075	102745037	15	70	9.9
4	104002725	104003275	1	chr4_104002725	Dab1	0	104002950	104003100	104002987	17	95	14.1
4	104084450	104085400	1	chr4_104084450	C8b	0	104085250	104085425	104085337	19	105	6.8
4	104603575	104604350	1	chr4_104603575	Prkaa2	0	104603850	104603950	104603912	14	53	7
4	105406225	105407300	1	chr4_105406225	Pcsk9	0	105406200	105406500	105406362	66	552	34.6
4	107679125	107681650	1	chr4_107679125	Echdc2	0	107680225	107680575	107680387	100	900	73
4	108523225	108524575	1	chr4_108523225	mmu-mir-761	0	108524400	108524850	108524637	76	860	61.3
4	109307075	109307250	1	chr4_109307075	Faf1	0	109307150	109307425	109307312	24	196	13.3
4	114398050	114400025	1	chr4_114398050	Foxd2	0	114399225	114399475	114399337	21	185	30.2
4	115451950	115453275	1	chr4_115451950	Dmbx1	0	115452750	115452925	115452787	29	169	24.3
4	116857400	116861500	1	chr4_116857400	Tmem53	0	116860125	116860325	116860237	34	232	33
4	116926825	116927850	1	chr4_116926825	4931406I20Rik	0	116927600	116927675	116927662	14	39	5.7
4	118086975	118088100	1	chr4_118086975	1110020C03Rik	0	118087800	118087875	118087862	16	45	7.7
4	118995375	118997800	1	chr4_118995375	BC057371	0	118996300	118996600	118996462	36	324	35.6
4	119090050	119090850	1	chr4_119090050	Guca2a	0	119090375	119090750	119090562	51	492	39.9
4	119749225	119751025	1	chr4_119749225	Foxo6	0	119750125	119750425	119750262	41	349	34.2
4	119885250	119887500	1	chr4_119885250	Scmh1	0	119885750	119885900	119885787	21	112	16.6
4	123575000	123577025	1	chr4_123575000	Rragc	0	123576050	123576175	123576087	20	87	13.5
4	123768200	123769425	1	chr4_123768200	Rragc	0	123769025	123769225	123769137	21	150	20.4
4	124916700	124918675	1	chr4_124916700	Grik3	0	124917650	124917875	124917687	31	240	35.2
4	125748075	125751875	1	chr4_125748075	Rprc1	0	125750825	125751150	125750962	70	613	58.1
4	126370900	126372650	1	chr4_126370900	AU040320	0	126371125	126371325	126371187	31	212	24.9
4	128381125	128382350	1	chr4_128381125	Trim62	0	128381625	128381925	128381812	30	277	32
4	128448425	128452925	1	chr4_128448425	Adc	0	128450175	128450300	128450237	23	107	20.7
4	128992850	128994075	1	chr4_128992850	Marcksl1	0	128992975	128993250	128993112	31	249	31.8
4	129252825	129253850	1	chr4_129252825	Khdrbs1	0	129252625	129253050	129252887	63	719	72.2
4	129467050	129469700	1	chr4_129467050	Bai2	0	129468625	129468875	129468787	44	331	45.7
4	129472450	129474375	1	chr4_129472450	Bai2	0	129472475	129472775	129472637	46	398	35.2
4	129928525	129931900	1	chr4_129928525	Pum1	0	129929925	129929975	129929937	17	34	6.7
4	131289850	131290850	1	chr4_131289850	Epb4.1	0	131290675	131290925	131290812	57	433	43.9
4	131296825	131297250	1	chr4_131296825	Epb4.1	0	131297075	131297150	131297087	13	39	5.9
4	131865050	131867000	1	chr4_131865050	Ptafr	0	131866475	131866500	131866487	13	13	2.2
4	132239700	132240800	1	chr4_132239700	Fgr	0	132240775	132240975	132240912	26	175	28.6
4	132761125	132762250	1	chr4_132761125	2300002D11Rik	0	132762125	132762200	132762137	16	46	8
4	134001300	134003250	1	chr4_134001300	Man1c1	0	134002225	134002550	134002362	39	384	57.5
4	135361450	135362825	1	chr4_135361450	Rpl11	0	135361250	135361575	135361412	51	440	35.5
4	135588075	135590700	1	chr4_135588075	Hnrpr	0	135589650	135590200	135589912	127	1462	46.8
4	135863925	135866150	1	chr4_135863925	Aof2	0	135866100	135866225	135866112	15	71	10.8
4	136869300	136874175	1	chr4_136869300	Usp48	0	136869525	136869575	136869562	21	40	8
4	137631550	137632550	1	chr4_137631550	Cda	0	137632000	137632125	137632062	16	73	11.5
4	137687375	137688900	1	chr4_137687375	0610009K11Rik	0	137688550	137688775	137688637	28	200	28.2
4	139396950	139400425	1	chr4_139396950	Igsf21	0	139398825	139398950	139398912	16	73	12.3
4	139916050	139916825	1	chr4_139916050	Arhgef10l	0	139916725	139917075	139916912	31	303	22.9
4	140541500	140542500	1	chr4_140541500	Arhgef19	0	140542325	140542575	140542437	33	261	26.5
4	141271600	141272100	1	chr4_141271600	Tmem51	0	141271575	141271850	141271712	26	227	28.3
4	142494350	142495675	1	chr4_142494350	Prdm2	0	142494700	142494900	142494837	25	165	22.3
4	142527875	142530650	1	chr4_142527875	Pdpn	0	142529325	142529600	142529412	35	290	35.5
4	142601125	142603775	1	chr4_142601125	Pdpn	0	142602875	142603100	142602937	23	173	24
4	144371025	144371925	1	chr4_144371025	Tnfrsf1b	0	144371675	144372000	144371862	28	277	39.5
4	147892050	147894700	1	chr4_147892050	Pex14	0	147891925	147892075	147891937	17	96	9.1
4	149433800	149436675	1	chr4_149433800	Slc45a1	0	149434800	149435000	149434937	24	160	19.6
4	152477050	152479050	1	chr4_152477050	Ajap1	0	152477075	152477450	152477262	70	731	61.7
7	6261625	6262675	1	chr7_6261625	Zim1	0	6262375	6262425	6262387	17	33	6.1
7	11959700	11959850	1	chr7_11959700	Zfp98	0	11959725	11960050	11959862	36	327	26.1
7	17159075	17160800	1	chr7_17159075	Ceacam13	0	17159825	17160025	17159912	24	178	6.6
7	24517175	24518600	1	chr7_24517175	Ceacam10	0	24517825	24518100	24517987	44	363	39.7
7	27329300	27332850	1	chr7_27329300	Akt2	0	27331000	27331150	27331112	32	170	25.8
7	28354225	28355225	1	chr7_28354225	C330005M16Rik	0	28354375	28354475	28354387	15	57	9.6
7	28676950	28681325	1	chr7_28676950	Actn4	0	28680000	28680025	28680012	13	13	2.1
7	29995000	29996150	1	chr7_29995000	Clip3	0	29995575	29995775	29995662	21	153	18.2
7	34306775	34307625	1	chr7_34306775	Kctd15	0	34306900	34306925	34306912	14	14	2.7
7	34585650	34586000	1	chr7_34585650	Pepd	0	34585700	34585800	34585787	17	62	10.5
7	35175475	35178375	1	chr7_35175475	Slc7a9	0	35176650	35177050	35176812	44	496	57.5
7	36353225	36353900	1	chr7_36353225	Tshz3	0	36353025	36353375	36353212	59	555	46.8
7	36901300	36902175	1	chr7_36901300	Tshz3	0	36901325	36901625	36901487	53	440	35.6
7	39269250	39269675	1	chr7_39269250	Zfp619	0	39268925	39269250	39269087	41	359	30.4
7	40539000	40540075	1	chr7_40539000	2900093B09Rik	0	40539350	40539375	40539362	13	13	2.1
7	41285700	41286675	1	chr7_41285700	AW146154	0	41285875	41286225	41286062	36	358	40.8
7	41364100	41365050	1	chr7_41364100	2810426N06Rik	0	41364075	41364350	41364212	30	238	30.7
7	43414625	43416300	1	chr7_43414625	Cd33	0	43415750	43415950	43415787	28	200	32.5
7	45416250	45422850	1	chr7_45416250	Dhrs10	0	45419550	45419950	45419712	82	791	58.8
7	48811800	48813025	1	chr7_48811800	E2f8	0	48812625	48812875	48812762	27	196	21.8
7	49544250	49546400	1	chr7_49544250	Dbx1	0	49546300	49546675	49546362	24	309	48
7	49642775	49643150	1	chr7_49642775	Prmt3	0	49642700	49642925	49642812	24	170	17.3
7	55867075	55867350	1	chr7_55867075	Nipa1	0	55867075	55867325	55867212	32	247	27.4
7	56386550	56387900	1	chr7_56386550	p	0	56387900	56387950	56387912	13	26	4.5
7	57555450	57556175	1	chr7_57555450	Gabrb3	0	57555675	57555875	57555762	23	153	21.9
7	58091950	58093025	1	chr7_58091950	Atp10a	0	58092650	58092950	58092762	34	321	39.2
7	63103400	63105550	1	chr7_63103400	Chrna7	0	63104400	63104675	63104512	39	315	20.2
7	63674525	63675475	1	chr7_63674525	Klf13	0	63675125	63675225	63675187	21	81	15.4
7	64150775	64151650	1	chr7_64150775	BB128963	0	64150950	64151275	64151112	31	269	37.3
7	64618050	64620850	1	chr7_64618050	5730507A09Rik	0	64618075	64618300	64618137	24	180	15.9
7	66369975	66372050	1	chr7_66369975	Aldh1a3	0	66370550	66370800	66370712	29	232	24.7
7	67886400	67889075	1	chr7_67886400	Igf1r	0	67888050	67888375	67888187	69	582	39.7
7	68782550	68784675	1	chr7_68782550	Arrdc4	0	68783275	68783400	68783287	14	70	12.4
7	71865275	71866725	1	chr7_71865275	Gm489	0	71865325	71865425	71865387	19	69	11.9
7	71877850	71879000	1	chr7_71877850	Gm489	0	71877850	71878150	71877987	64	544	41.2
7	72035400	72035775	1	chr7_72035400	Gm489	0	72035400	72035600	72035562	19	124	16.8
7	73011425	73014925	1	chr7_73011425	Rgma	0	73014800	73014850	73014812	20	40	7.8
7	73476350	73478300	1	chr7_73476350	Chd2	0	73476325	73476675	73476512	89	815	45.1
7	73533200	73533225	1	chr7_73533200	Chd2	0	73533175	73533375	73533312	23	156	20.8
7	77612525	77612775	1	chr7_77612525	Ntrk3	0	77612500	77612800	77612687	18	192	24.2
7	78728650	78729525	1	chr7_78728650	Det1	0	78728625	78728850	78728712	19	152	19.8
7	79692000	79693075	1	chr7_79692000	Mesp2	0	79691925	79692150	79692037	31	221	33.2
7	80696550	80698175	1	chr7_80696550	Iqgap1	0	80696600	80696800	80696712	31	205	32.3
7	81056050	81056925	1	chr7_81056050	Pde8a	0	81056700	81056975	81056812	22	202	24.4
7	82913550	82914650	1	chr7_82913550	Eftud1	0	82913300	82913550	82913387	21	171	17.6
7	83253250	83254250	1	chr7_83253250	Tmc3	0	83252950	83253425	83253162	62	717	34.5
7	83276900	83277800	1	chr7_83276900	Tmc3	0	83277275	83277350	83277287	14	41	7.7
7	89872175	89873050	1	chr7_89872175	Eed	0	89872775	89873075	89872887	43	378	10.6
7	96437925	96439150	1	chr7_96437925	mmu-mir-708	0	96438925	96439075	96438987	22	115	20
7	96545350	96545900	1	chr7_96545350	Nars2	0	96545425	96545450	96545437	13	13	1.7
7	97615975	97617575	1	chr7_97615975	Aqp11	0	97617025	97617200	97617137	31	189	28.5
7	97678375	97679475	1	chr7_97678375	Pak1	0	97679075	97679275	97679162	17	115	6.7
7	97847300	97848900	1	chr7_97847300	Gdpd4	0	97847750	97847975	97847862	35	254	36.9
7	98842650	98844425	1	chr7_98842650	Wnt11	0	98843650	98843875	98843762	32	233	34.2
7	100373725	100378950	1	chr7_100373725	Ucp2	0	100376225	100376425	100376387	28	189	31.6
7	102289175	102289750	1	chr7_102289175	Rrm1	0	102289650	102289975	102289812	49	428	44
7	107139925	107141075	1	chr7_107139925	Syt9	0	107140350	107140800	107140637	58	685	64.5
7	110537000	110538875	1	chr7_110537000	Ampd3	0	110537750	110537975	110537787	29	237	31.6
7	112826725	112828500	1	chr7_112826725	4632411J06Rik	0	112826975	112827200	112827062	36	264	33
7	113441200	113443100	1	chr7_113441200	Spon1	0	113441825	113442050	113441937	28	192	17.3
7	113617700	113618850	1	chr7_113617700	Spon1	0	113617825	113617900	113617862	15	43	8.1
7	113795400	113795650	1	chr7_113795400	Rras2	0	113795450	113795675	113795562	39	296	35.5
7	114848100	114849000	1	chr7_114848100	3830422K02Rik	0	114848525	114848725	114848562	23	153	17.2
7	115333425	115335375	1	chr7_115333425	Sox6	0	115334825	115335025	115334937	24	161	30.4
7	115657000	115657525	1	chr7_115657000	Sox6	0	115657225	115657700	115657387	97	1037	55.9
7	115658600	115660475	1	chr7_115658600	Sox6	0	115659625	115659875	115659737	26	207	29
7	117384175	117385300	1	chr7_117384175	Xylt1	0	117384900	117385175	117385037	21	192	18.7
7	118369525	118372075	1	chr7_118369525	Tmc7	0	118371125	118371325	118371212	24	166	29
7	118402675	118403300	1	chr7_118402675	Tmc5	0	118403175	118403200	118403187	18	18	3.5
7	120486175	120487175	1	chr7_120486175	4930408O21Rik	0	120486800	120487125	120486962	24	228	34.8
7	120651600	120652600	1	chr7_120651600	Eef2k	0	120652100	120652325	120652187	25	187	24
7	120690950	120691675	1	chr7_120690950	Polr3e	0	120691575	120691600	120691587	13	13	2.2
7	121395250	121395775	1	chr7_121395250	Scnn1g	0	121395475	121395675	121395512	16	118	16.5
7	122269150	122270625	1	chr7_122269150	Prkcb1	0	122269125	122269375	122269262	50	377	42.6
7	124511700	124512250	1	chr7_124511700	Jmjd5	0	124512150	124512375	124512287	25	186	17.9
7	126309625	126310450	1	chr7_126309625	Atxn2l	0	126309800	126309900	126309837	20	75	13.3
7	126471200	126471350	1	chr7_126471200	Sult1a1	0	126471075	126471250	126471187	19	113	7.5
7	127013525	127015750	1	chr7_127013525	2012-09-01	0	127015200	127015550	127015387	74	674	51.4
7	127234800	127235625	1	chr7_127234800	Zfp689	0	127235075	127235150	127235087	15	43	7.8
7	128463100	128464225	1	chr7_128463100	Inpp5f	0	128463125	128463200	128463137	13	39	7.4
7	131493725	131494900	1	chr7_131493725	Bub3	0	131494575	131494800	131494662	31	245	41.1
7	132240950	132243550	1	chr7_132240950	4631426J05Rik	0	132242300	132242525	132242362	26	198	33.5
7	133276350	133277525	1	chr7_133276350	4930404H21Rik	0	133276175	133276450	133276312	42	350	43.6
7	133784700	133785900	1	chr7_133784700	Fank1	0	133785600	133786100	133785912	77	947	40.1
7	134085150	134085575	1	chr7_134085150	Adam12	0	134085100	134085200	134085162	15	55	8.4
7	134600250	134601275	1	chr7_134600250	Dock1	0	134600175	134600500	134600337	58	504	43.3
7	135476025	135476975	1	chr7_135476025	Ptpre	0	135476350	135476575	135476437	26	184	21.1
7	136504775	136505850	1	chr7_136504775	Mgmt	0	136505150	136505275	136505187	15	71	9.6
7	136651725	136652675	1	chr7_136651725	Mgmt	0	136652450	136652650	136652562	15	111	16.8
7	136684500	136684700	1	chr7_136684500	Mgmt	0	136684450	136684750	136684587	34	288	23.9
7	136709850	136711550	1	chr7_136709850	Mgmt	0	136710525	136710825	136710662	46	380	30.3
7	139441700	139443900	1	chr7_139441700	Nkx6-2	0	139442650	139442725	139442687	16	44	7.5
7	140081400	140082850	1	chr7_140081400	E430002D04Rik	0	140082350	140082600	140082512	32	255	17.2
7	140762700	140763275	1	chr7_140762700	Nlrp6	0	140763050	140763150	140763062	16	62	9.2
7	140881225	140882750	1	chr7_140881225	Ifitm6	0	140881800	140881950	140881912	16	89	7
7	141583325	141584050	1	chr7_141583325	Muc5ac	0	141583700	141583850	141583737	15	86	9.6
7	142018525	142021225	1	chr7_142018525	Krtap5-5	0	142020375	142020600	142020462	34	267	14
7	142039350	142041375	1	chr7_142039350	Krtap5-2	0	142040875	142041150	142040987	28	222	19.4
7	144630650	144633225	1	chr7_144630650	Fgf3	0	144631375	144631525	144631487	18	96	17.2
7	144707525	144708975	1	chr7_144707525	Fgf15	0	144708125	144708175	144708162	14	27	3.6
8	3648825	3649650	1	chr8_3648825	Retn	0	3649075	3649225	3649112	32	168	29
8	8487475	8491025	1	chr8_8487475	Efnb2	0	8489700	8489950	8489812	36	289	37.3
8	8871050	8873475	1	chr8_8871050	9430010O03Rik	0	8871975	8872200	8872112	39	277	26.4
8	8983000	8985400	1	chr8_8983000	9430010O03Rik	0	8984375	8984550	8984437	22	133	24.4
8	14786925	14788200	1	chr8_14786925	Cln8	0	14787025	14787325	14787162	51	424	44.5
8	14922750	14924850	1	chr8_14922750	Arhgef10	0	14922975	14923225	14923062	31	256	34.6
8	17576000	17576900	1	chr8_17576000	Csmd1	0	17576225	17576275	17576237	13	26	2
8	23241250	23242450	1	chr8_23241250	Defcr24	0	23241550	23241875	23241712	44	378	34.1
8	23880750	23882625	1	chr8_23880750	Mrps31	0	23881650	23881875	23881812	35	243	31.1
8	24848475	24850500	1	chr8_24848475	Sfrp1	0	24848550	24848575	24848562	14	14	2.4
8	25911000	25912000	1	chr8_25911000	1810011O10Rik	0	25911050	25911175	25911087	18	80	8
8	26036175	26037050	1	chr8_26036175	C230043N17Rik	0	26036700	26037050	26036862	52	492	52.5
8	26472850	26473850	1	chr8_26472850	Adam9	0	26473175	26473200	26473187	13	13	2.5
8	26477000	26477525	1	chr8_26477000	Adam9	0	26477125	26477200	26477137	14	42	7.4
8	26638525	26639600	1	chr8_26638525	Tacc1	0	26638650	26638675	26638662	13	13	2.5
8	27011050	27015000	1	chr8_27011050	Fgfr1	0	27013675	27013700	27013687	28	28	5.6
8	27398925	27400850	1	chr8_27398925	D8Ertd354e	0	27399950	27400375	27400087	55	686	85.7
8	27402275	27404125	1	chr8_27402275	D8Ertd354e	0	27402850	27402925	27402912	22	62	10.9
8	28717775	28719850	1	chr8_28717775	Eif4ebp1	0	28719700	28719900	28719837	33	231	40.6
8	29369300	29370300	1	chr8_29369300	4921537P18Rik	0	29369825	29370150	29369962	51	458	32.1
8	29375550	29376425	1	chr8_29375550	4921537P18Rik	0	29375275	29375650	29375462	60	553	21.9
8	32114050	32114700	1	chr8_32114050	Dusp26	0	32114500	32114850	32114662	50	457	28.2
8	32503325	32505725	1	chr8_32503325	Dusp26	0	32504550	32504750	32504637	21	132	11.2
8	33510275	33511275	1	chr8_33510275	Nrg1	0	33510300	33510650	33510487	42	452	40.8
8	35234500	35234725	1	chr8_35234500	Gtf2e2	0	35234525	35234625	35234537	18	67	10.8
8	35243100	35247450	1	chr8_35243100	Gtf2e2	0	35243875	35244100	35243987	54	404	51.5
8	36199975	36202725	1	chr8_36199975	Dusp4	0	36201175	36201600	36201387	136	1363	52.2
8	36569650	36570450	1	chr8_36569650	Tnks	0	36570325	36570350	36570337	13	13	2.2
8	36681050	36681350	1	chr8_36681050	Ppp1r3b	0	36681325	36681525	36681387	19	142	17.7
8	37350025	37352025	1	chr8_37350025	Cldn23	0	37351225	37351600	37351462	46	468	56.7
8	37424725	37425350	1	chr8_37424725	Cldn23	0	37424875	37425300	37425037	60	672	42
8	37615950	37618200	1	chr8_37615950	D8Ertd82e	0	37617900	37618075	37617987	18	111	18.9
8	37700875	37702200	1	chr8_37700875	Lonrf1	0	37701150	37701275	37701187	22	105	15.6
8	37720275	37722800	1	chr8_37720275	Lonrf1	0	37721175	37721450	37721337	45	355	35.5
8	41810925	41811725	1	chr8_41810925	Fgf20	0	41811175	41811350	41811287	15	95	18.7
8	42465725	42467750	1	chr8_42465725	Pdgfrl	0	42466600	42466725	42466687	27	120	19.1
8	42587000	42588900	1	chr8_42587000	Mtus1	0	42587500	42587750	42587612	32	238	23.7
8	42840525	42841475	1	chr8_42840525	Asah1	0	42840925	42841000	42840937	15	42	7.3
8	46476850	46479975	1	chr8_46476850	Fat1	0	46478050	46478550	46478312	232	2409	74.7
8	46500050	46504300	1	chr8_46500050	Fat1	0	46499950	46500100	46500087	19	95	15.2
8	46744900	46745925	1	chr8_46744900	F11	0	46745175	46745525	46745312	82	723	68.1
8	48695100	48695725	1	chr8_48695100	Stox2	0	48695175	48695525	48695362	47	430	41.5
8	49809075	49809525	1	chr8_49809075	Dctd	0	49809125	49809250	49809137	14	68	9.2
8	50250525	50251575	1	chr8_50250525	Odz3	0	50250575	50251100	50250887	149	1800	77.4
8	50308350	50310075	1	chr8_50308350	Odz3	0	50309425	50309575	50309562	22	101	14
8	60629400	60630150	1	chr8_60629400	Galnt7	0	60629500	60629625	60629512	14	67	12.6
8	60652675	60655775	1	chr8_60652675	Galnt7	0	60653225	60653275	60653262	25	46	8.1
8	60682325	60683600	1	chr8_60682325	Galnt7	0	60682900	60682925	60682912	13	13	2.5
8	63426850	63427525	1	chr8_63426850	Aadat	0	63427400	63427450	63427412	14	28	4.6
8	63837925	63838525	1	chr8_63837925	Clcn3	0	63838125	63838275	63838162	17	90	9.6
8	66821925	66823225	1	chr8_66821925	Tll1	0	66821850	66822400	66822037	78	930	31.8
8	67291075	67292375	1	chr8_67291075	mmu-mir-710	0	67291850	67292050	67291937	40	292	43
8	67300200	67301125	1	chr8_67300200	mmu-mir-710	0	67300950	67301150	67301037	21	143	12.4
8	67549750	67550075	1	chr8_67549750	Cpe	0	67549725	67549925	67549862	18	123	18.9
8	67761225	67764050	1	chr8_67761225	Klhl2	0	67763200	67763475	67763362	36	320	46.4
8	68136850	68138100	1	chr8_68136850	Trim60	0	68137850	68138225	68137987	86	826	65.4
8	69252600	69252750	1	chr8_69252600	1810029B16Rik	0	69252325	69252700	69252512	77	751	34.6
8	69417625	69417775	1	chr8_69417625	1810029B16Rik	0	69417550	69417800	69417662	49	368	25.3
8	70859950	70860725	1	chr8_70859950	Psd3	0	70859925	70860125	70860062	23	148	25.4
8	71176275	71178000	1	chr8_71176275	Psd3	0	71176950	71177225	71177112	28	246	33.1
8	72145300	72146425	1	chr8_72145300	D10627	0	72145875	72146150	72145987	40	337	32.8
8	73199675	73203150	1	chr8_73199675	Homer3	0	73203150	73203675	73203337	76	923	64.1
8	76231500	76234550	1	chr8_76231500	Large	0	76232925	76233275	76233087	73	738	62.8
8	80407825	80408875	1	chr8_80407825	Arhgap10	0	80408250	80408300	80408262	22	43	7.8
8	80992250	80994425	1	chr8_80992250	1700031F13Rik	0	80994150	80994325	80994287	25	150	25.7
8	81319200	81321775	1	chr8_81319200	Pou4f2	0	81320100	81320300	81320162	32	206	31.7
8	81473300	81474475	1	chr8_81473300	2410193C02Rik	0	81474125	81474450	81474262	56	538	50.6
8	81808700	81809050	1	chr8_81808700	Lsm6	0	81808625	81808800	81808737	45	277	42.6
8	82048875	82050525	1	chr8_82048875	D630040G17Rik	0	82049600	82049800	82049662	22	146	22.1
8	84788925	84790050	1	chr8_84788925	Inpp4b	0	84789775	84789800	84789787	13	13	2.2
8	86050725	86052500	1	chr8_86050725	Tbc1d9	0	86049900	86050800	86050087	76	1190	125.7
8	86624825	86626875	1	chr8_86624825	Cd97	0	86625525	86625550	86625537	17	17	3.4
8	87317950	87321650	1	chr8_87317950	Cacna1a	0	87319225	87319300	87319262	33	96	16.2
8	88331225	88333450	1	chr8_88331225	4921524J17Rik	0	88331700	88332250	88331887	110	1406	87.6
8	88480300	88481375	1	chr8_88480300	Dnaja2	0	88480450	88480500	88480487	20	37	7
8	89624750	89627325	1	chr8_89624750	Siah1a	0	89625750	89625825	89625762	23	64	12.1
8	89664675	89666725	1	chr8_89664675	Siah1a	0	89665625	89665950	89665762	59	575	59.4
8	90155100	90155850	1	chr8_90155100	Cbln1	0	90155100	90155375	90155262	34	282	30.4
8	90756425	90757750	1	chr8_90756425	Zfp423	0	90756900	90757000	90756962	18	68	10.8
8	90872175	90875375	1	chr8_90872175	Zfp423	0	90873700	90873875	90873737	21	129	16.1
8	92046675	92048225	1	chr8_92046675	Sall1	0	92046975	92047325	92047162	67	617	47.3
8	92712900	92715975	1	chr8_92712900	Tox3	0	92714800	92715000	92714862	34	233	27.7
8	93135025	93135325	1	chr8_93135025	Tox3	0	93134925	93135200	93135012	45	378	23.7
8	93410525	93410550	1	chr8_93410525	Tox3	0	93410500	93410675	93410537	23	131	20.8
8	93739625	93743025	1	chr8_93739625	Chd9	0	93741675	93742050	93741812	93	844	71.8
8	94273725	94274725	1	chr8_94273725	Fto	0	94274200	94274225	94274212	14	14	2.7
8	94916950	94919175	1	chr8_94916950	Irx3	0	94917550	94917875	94917687	57	512	41.9
8	94921150	94921175	1	chr8_94921150	Irx3	0	94921000	94921200	94921112	26	176	24.9
8	94960200	94962050	1	chr8_94960200	Irx3	0	94960750	94961000	94960887	29	245	29.3
8	95105650	95106325	1	chr8_95105650	Irx5	0	95105400	95105750	95105587	37	367	44.1
8	95602600	95602950	1	chr8_95602600	Irx6	0	95602425	95602675	95602562	31	243	26.7
8	95631225	95633000	1	chr8_95631225	Irx6	0	95632325	95632675	95632512	106	949	47.1
8	96481225	96482225	1	chr8_96481225	Ces7	0	96481550	96481575	96481562	15	15	2.5
8	98393675	98394475	1	chr8_98393675	Csnk2a2	0	98393975	98394250	98394087	40	348	45.5
8	108321300	108323275	1	chr8_108321300	Lrrc36	0	108321275	108321625	108321437	41	402	30
8	109178000	109179350	1	chr8_109178000	Smpd3	0	109178400	109178600	109178512	35	240	30.4
8	110024725	110026350	1	chr8_110024725	Cyb5b	0	110025350	110025500	110025412	16	91	16.3
8	110175450	110178125	1	chr8_110175450	Nfat5	0	110176575	110177075	110176862	119	1364	90.2
8	111423575	111425425	1	chr8_111423575	Atbf1	0	111424550	111424700	111424662	21	106	17.7
8	111533975	111536875	1	chr8_111533975	Atbf1	0	111534850	111535050	111534912	25	174	30.4
8	113387000	113391125	1	chr8_113387000	Vac14	0	113389075	113389175	113389137	23	84	15.1
8	114431350	114437800	1	chr8_114431350	Znrf1	0	114432625	114432675	114432662	15	29	5.4
8	114474675	114475775	1	chr8_114474675	Ldhd	0	114475025	114475200	114475112	22	130	20.8
8	114830200	114831300	1	chr8_114830200	Gabarapl2	0	114830400	114830650	114830562	29	238	28.8
8	114919000	114920350	1	chr8_114919000	Terf2ip	0	114919800	114919975	114919862	53	301	50
8	117001700	117002875	1	chr8_117001700	Nudt7	0	117002050	117002375	117002212	61	535	50.8
8	117562450	117563675	1	chr8_117562450	Wwox	0	117562975	117563200	117563062	28	199	24.9
8	120080125	120081425	1	chr8_120080125	Gan	0	120080450	120080750	120080637	80	675	63
8	120378300	120379750	1	chr8_120378300	Plcg2	0	120379500	120379875	120379687	89	842	81.3
8	120388500	120391150	1	chr8_120388500	Plcg2	0	120389575	120389925	120389687	66	652	55.6
8	120902125	120904675	1	chr8_120902125	Mphosph6	0	120903125	120903300	120903237	18	115	16.6
8	121409100	121411000	1	chr8_121409100	Cdh13	0	121409950	121410300	121410112	88	723	26
8	121681400	121683875	1	chr8_121681400	Cdh13	0	121682475	121682800	121682612	33	321	41.1
8	122512900	122515025	1	chr8_122512900	Kcng4	0	122514100	122514250	122514162	20	109	18.9
8	123260200	123265050	1	chr8_123260200	Gse1	0	123261175	123261375	123261287	50	340	48.7
8	123410500	123418675	1	chr8_123410500	Gse1	0	123417025	123417075	123417062	16	30	4
8	124799775	124801100	1	chr8_124799775	BC048644	0	124800200	124800250	124800212	16	30	5.4
8	129243450	129247125	1	chr8_129243450	Slc35f3	0	129244100	129244325	129244237	61	432	46.9
8	129641950	129642575	1	chr8_129641950	Tomm20	0	129642400	129642550	129642437	23	118	18.6
8	130091150	130092350	1	chr8_130091150	Pard3	0	130091225	130091450	130091362	29	221	24.6
8	130153225	130154475	1	chr8_130153225	Pard3	0	130154125	130154400	130154262	24	213	21.6
8	130228975	130230200	1	chr8_130228975	Pard3	0	130229175	130229625	130229362	101	1032	57.5
8	130385000	130386150	1	chr8_130385000	Pard3	0	130385225	130385250	130385237	24	24	4.7
8	130661375	130662025	1	chr8_130661375	Pard3	0	130661775	130661825	130661787	15	28	2.7
8	130928400	130930025	1	chr8_130928400	Nrp1	0	130929000	130929375	130929162	95	867	56.8
9	7710700	7711400	1	chr9_7710700	Mmp7	0	7710725	7710825	7710737	14	54	7.1
9	8988600	8990925	1	chr9_8988600	Pgr	0	8989300	8989650	8989487	44	444	42.9
9	9231450	9232725	1	chr9_9231450	Pgr	0	9231150	9231525	9231312	86	810	57.4
9	13438675	13440950	1	chr9_13438675	Mtmr2	0	13440925	13441175	13441062	20	166	22.5
9	14773575	14773600	1	chr9_14773575	Panx1	0	14773500	14773850	14773687	46	442	38.3
9	17791750	17793025	1	chr9_17791750	Chordc1	0	17791850	17791950	17791862	15	57	4.3
9	18363300	18364500	1	chr9_18363300	Mbd3l1	0	18364075	18364325	18364187	27	207	13.8
9	20203675	20204350	1	chr9_20203675	Zfp26	0	20204100	20204275	20204212	22	134	23.6
9	21910950	21911800	1	chr9_21910950	1810008A14Rik	0	21911775	21911950	21911887	23	135	20
9	22482625	22483800	1	chr9_22482625	E130103I17Rik	0	22483150	22483325	22483212	16	102	13.5
9	23910750	23911525	1	chr9_23910750	Npsr1	0	23910750	23911175	23910987	57	566	31.8
9	24527000	24527950	1	chr9_24527000	Tbx20	0	24527025	24527225	24527112	24	164	23.5
9	25313150	25314350	1	chr9_25313150	2310005P05Rik	0	25313350	25313575	25313462	27	196	14.9
9	28363300	28365725	1	chr9_28363300	Opcml	0	28363425	28363625	28363462	18	124	14.5
9	29056600	29056700	1	chr9_29056600	Hnt	0	29056675	29056700	29056687	14	14	2.1
9	29360325	29362150	1	chr9_29360325	Hnt	0	29361500	29361900	29361637	26	305	28.6
9	29407025	29408650	1	chr9_29407025	Hnt	0	29407175	29407450	29407312	45	367	24.7
9	29598225	29598350	1	chr9_29598225	Hnt	0	29598250	29598500	29598387	30	223	13
9	31067925	31069075	1	chr9_31067925	Prdm10	0	31068575	31068750	31068662	21	128	19.6
9	31188100	31189450	1	chr9_31188100	Tmem45b	0	31188675	31188750	31188687	18	49	8.4
9	31725550	31725850	1	chr9_31725550	Barx2	0	31725800	31726075	31725912	45	371	35.6
9	31738050	31740325	1	chr9_31738050	Barx2	0	31739125	31739375	31739262	25	202	34.5
9	31965175	31965575	1	chr9_31965175	Grit	0	31965350	31965550	31965437	21	144	24.6
9	32126475	32128050	1	chr9_32126475	Kcnj1	0	32127300	32127475	32127387	24	148	25.4
9	32164100	32165725	1	chr9_32164100	Kcnj1	0	32164550	32164850	32164687	68	586	43.6
9	42628075	42631300	1	chr9_42628075	Grik4	0	42629475	42629675	42629587	19	131	20.1
9	43204175	43206500	1	chr9_43204175	Trim29	0	43205200	43205375	43205237	20	120	21.4
9	43515725	43517225	1	chr9_43515725	Pvrl1	0	43516450	43516675	43516587	30	213	17
[truncated: 101 more rows]

## Sheet: Sox2 ESC Active Enhancers
CHROM	START	STOP	STRAND	ID1	ID2	DISTANCE	REGION START	REGION END	PEAK POS	PEAK HEIGHT	TOTAL TARGET COUNTS	TOTAL BACKGROUND COUNTS
11	4145525	4148225	1	chr11_4145525	Osm	0	4146150	4146550	4146362	77	751	64.4
11	4360075	4367150	1	chr11_4360075	Mtmr3	0	4364300	4364500	4364387	24	167	24.3
11	4542175	4545600	1	chr11_4542175	Mtmr3	0	4544000	4544100	4544037	16	56	8.5
11	4590475	4591800	1	chr11_4590475	1110020P15Rik	0	4590450	4590625	4590537	18	108	12.6
11	4759725	4763700	1	chr11_4759725	Nf2	0	4761300	4761350	4761312	18	36	6.4
11	5224350	5224475	1	chr11_5224350	Kremen1	0	5224300	5224400	5224387	20	67	9.4
11	5393850	5403225	1	chr11_5393850	Xbp1	0	5399125	5399225	5399187	26	95	16.1
11	5842250	5844400	1	chr11_5842250	Ykt6	0	5843025	5843350	5843162	46	429	46.4
11	5867525	5869550	1	chr11_5867525	Ykt6	0	5868400	5868450	5868412	13	26	4.5
11	5933850	5939975	1	chr11_5933850	Nudcd3	0	5939000	5939275	5939137	49	412	58.9
11	6022925	6025100	1	chr11_6022925	Camk2b	0	6023700	6024000	6023862	30	263	30
11	6077675	6083850	1	chr11_6077675	Npc1l1	0	6080850	6081150	6080987	59	491	48.9
11	6264625	6268475	1	chr11_6264625	Ogdh	0	6264675	6264825	6264737	18	100	12.6
11	6967625	6970025	1	chr11_6967625	Igfbp1	0	6968525	6968700	6968612	30	181	23.7
11	7321750	7325825	1	chr11_7321750	Igfbp3	0	7323475	7323825	7323687	54	547	60.9
11	7339075	7341075	1	chr11_7339075	Igfbp3	0	7339825	7340000	7339837	17	108	13
11	8481375	8495250	1	chr11_8481375	Hus1	0	8486375	8486450	8486437	17	48	9.2
11	8495350	8505825	1	chr11_8495350	Hus1	0	8505250	8505550	8505387	42	376	42.2
11	8558350	8561650	1	chr11_8558350	Tns3	0	8559150	8559175	8559162	13	13	1.8
11	8570425	8572875	1	chr11_8570425	Tns3	0	8571600	8571775	8571687	21	127	20.5
11	8653975	8654900	1	chr11_8653975	Tns3	0	8654525	8654825	8654662	41	337	21.8
11	8884950	8887325	1	chr11_8884950	Hus1	0	8885750	8886000	8885837	23	187	27.8
11	11720100	11725850	1	chr11_11720100	Fignl1	0	11722850	11722950	11722912	30	115	21.9
11	11778125	11783675	1	chr11_11778125	Grb10	0	11781700	11782225	11781962	85	1028	70.4
11	12711075	12713025	1	chr11_12711075	Cobl	0	12711700	12711925	12711787	35	260	36.4
11	12903400	12905600	1	chr11_12903400	Cobl	0	12905300	12905475	12905312	15	99	6.3
11	18973625	18974650	1	chr11_18973625	Meis1	0	18974200	18974500	18974312	90	733	48.2
11	19647075	19648325	1	chr11_19647075	Spred2	0	19647575	19647800	19647762	29	220	30.3
11	19711625	19712375	1	chr11_19711625	Spred2	0	19711375	19711625	19711537	44	344	38.7
11	19958950	19960900	1	chr11_19958950	Actr2	0	19959750	19959925	19959812	17	106	18.9
11	20042925	20047100	1	chr11_20042925	Actr2	0	20045425	20045700	20045562	51	422	43
11	20063575	20067175	1	chr11_20063575	Rab1	0	20064975	20065300	20065137	38	383	59.9
11	20122700	20145500	1	chr11_20122700	Slc1a4	0	20144550	20144575	20144562	26	26	5.2
11	20219100	20227700	1	chr11_20219100	Cep68	0	20220650	20220975	20220812	61	547	58.8
11	22379550	22381325	1	chr11_22379550	Tmem17	0	22379825	22380125	22379987	28	258	31.1
11	22463050	22465750	1	chr11_22463050	Tmem17	0	22463850	22463975	22463862	20	88	16.3
11	22499300	22504650	1	chr11_22499300	Tmem17	0	22503525	22503550	22503537	14	14	2.7
11	22505100	22512175	1	chr11_22505100	Tmem17	0	22507675	22508000	22507812	51	465	44
11	22691400	22693100	1	chr11_22691400	B3gnt1	0	22692325	22692475	22692387	18	97	14.8
11	22726450	22735175	1	chr11_22726450	Commd1	0	22730100	22730375	22730237	40	329	47.1
11	22749750	22755475	1	chr11_22749750	B3gnt1	0	22751525	22752000	22751662	45	480	41.1
11	22847125	22850525	1	chr11_22847125	Zrsr1	0	22849025	22849325	22849162	45	392	38.5
11	23700675	23704575	1	chr11_23700675	Rel	0	23701925	23702200	23702037	32	280	30.4
11	24009775	24013825	1	chr11_24009775	Papolg	0	24010850	24011025	24010887	18	110	19.7
11	25998450	26000700	1	chr11_25998450	Fancl	0	25999075	25999225	25999087	14	83	12.8
11	26027075	26031750	1	chr11_26027075	Fancl	0	26029025	26029275	26029112	26	220	28.6
11	29648350	29649950	1	chr11_29648350	Rtn4	0	29649250	29649325	29649262	27	78	14.5
11	30056550	30063950	1	chr11_30056550	C230094A16Rik	0	30061075	30061300	30061212	27	176	26.3
11	30075900	30079000	1	chr11_30075900	C230094A16Rik	0	30077100	30077500	30077312	90	886	58.4
11	30391000	30391900	1	chr11_30391000	Acyp2	0	30391900	30392275	30392087	51	506	26.5
11	30648400	30652975	1	chr11_30648400	Psme4	0	30650100	30650825	30650662	60	1032	139.4
11	31633925	31637550	1	chr11_31633925	2310022M17Rik	0	31636675	31636850	31636712	18	112	18.7
11	31643675	31647400	1	chr11_31643675	2310022M17Rik	0	31645800	31646000	31645887	23	153	20.5
11	32283750	32285025	1	chr11_32283750	9630054F20Rik	0	32283975	32284100	32284012	16	78	10.1
11	33425900	33427500	1	chr11_33425900	Ranbp17	0	33427275	33427675	33427487	150	1424	64.7
11	33478375	33479900	1	chr11_33478375	Ranbp17	0	33479000	33479050	33479037	14	27	4.9
11	35366475	35368325	1	chr11_35366475	355	0	35367300	35367575	35367462	36	317	43.7
11	36396650	36397400	1	chr11_36396650	Odz2	0	36396925	36397050	36396962	18	84	14.5
11	40570725	40570775	1	chr11_40570725	Hmmr	0	40570600	40570775	40570662	16	105	9.9
11	41952150	41953450	1	chr11_41952150	Gabra1	0	41953050	41953375	41953212	40	357	13.8
11	43428075	43430075	1	chr11_43428075	Fabp6	0	43429125	43429325	43429212	25	165	26.7
11	43595600	43596625	1	chr11_43595600	Ttc1	0	43596500	43596700	43596562	20	142	13
11	44549900	44553950	1	chr11_44549900	3732413I11Rik	0	44552675	44553025	44552837	96	868	45.4
11	44604175	44609625	1	chr11_44604175	3732413I11Rik	0	44604975	44605275	44605112	40	335	41.1
11	44684375	44686225	1	chr11_44684375	3732413I11Rik	0	44685175	44685450	44685287	97	766	39.2
11	44706450	44708700	1	chr11_44706450	3732413I11Rik	0	44707375	44707725	44707537	112	993	55.2
11	45884225	45886175	1	chr11_45884225	Adam19	0	45885375	45885550	45885487	16	102	18.2
11	45955375	45966850	1	chr11_45955375	9530066K23Rik	0	45958500	45958850	45958687	67	635	54.6
11	46096850	46099275	1	chr11_46096850	C030019I05Rik	0	46098775	46099050	46098862	35	275	31
11	49501775	49503675	1	chr11_49501775	Scgb3a1	0	49502600	49502925	49502787	45	409	51.5
11	49606425	49609675	1	chr11_49606425	Gfpt2	0	49608100	49608175	49608137	15	43	6.3
11	49647475	49650975	1	chr11_49647475	Mapk9	0	49649675	49650025	49649837	48	505	55.2
11	50232500	50235850	1	chr11_50232500	Hnrph1	0	50234675	50234975	50234837	46	395	38.1
11	51546600	51548625	1	chr11_51546600	0610009B22Rik	0	51546750	51546925	51546837	22	125	15.9
11	51851275	51852450	1	chr11_51851275	Ube2b	0	51851500	51851550	51851537	19	37	7
11	52182075	52185950	1	chr11_52182075	Vdac1	0	52183600	52183825	52183712	44	333	47.5
11	53100675	53105200	1	chr11_53100675	Zcchc10	0	53104175	53104250	53104187	16	43	7.7
11	53592475	53594400	1	chr11_53592475	Irf1	0	53593250	53593400	53593287	18	96	10.8
11	53626475	53628325	1	chr11_53626475	Irf1	0	53627525	53627600	53627587	22	62	10.6
11	53915150	53917900	1	chr11_53915150	Pdlim4	0	53916950	53917100	53917037	16	85	11.2
11	54815075	54820900	1	chr11_54815075	Anxa6	0	54817350	54817375	54817362	14	14	2.1
11	54841350	54843550	1	chr11_54841350	Anxa6	0	54842250	54842375	54842362	18	79	14.9
11	54865350	54873625	1	chr11_54865350	Ccdc69	0	54869750	54869925	54869812	16	104	15.9
11	55162300	55171850	1	chr11_55162300	Fat2	0	55168575	55168675	55168587	16	61	9.2
11	55788325	55794875	1	chr11_55788325	Nmur2	0	55790050	55790425	55790237	121	1077	47.8
11	55800050	55802600	1	chr11_55800050	Nmur2	0	55800725	55801100	55800912	44	470	34.2
11	57368800	57370825	1	chr11_57368800	Mfap3	0	57369375	57369525	57369437	19	104	16.8
11	58883950	58885825	1	chr11_58883950	Trim11	0	58884800	58885025	58884912	22	178	23.7
11	59326850	59332175	1	chr11_59326850	Zfp496	0	59327825	59328050	59327962	40	290	32
11	59707975	59712650	1	chr11_59707975	Nt5m	0	59709375	59709525	59709437	19	104	16.8
11	60063700	60065925	1	chr11_60063700	Srebf1	0	60064750	60064825	60064787	17	48	8.2
11	60116050	60119125	1	chr11_60116050	Lrrc48	0	60118075	60118150	60118087	15	44	8.7
11	60256675	60262475	1	chr11_60256675	Drg2	0	60260325	60260450	60260387	19	83	14.2
11	60554650	60559125	1	chr11_60554650	Smcr7	0	60556500	60556850	60556612	23	255	38.8
11	60652775	60654650	1	chr11_60652775	Shmt1	0	60653125	60653325	60653237	15	110	15.9
11	60791175	60794375	1	chr11_60791175	Map2k3	0	60793100	60793300	60793287	25	167	31.8
11	61112675	61114050	1	chr11_61112675	Aldh3a2	0	61113600	61113750	61113737	19	101	16.9
11	61177550	61178750	1	chr11_61177550	1300013J15Rik	0	61178125	61178325	61178187	28	187	23.9
11	61399425	61402575	1	chr11_61399425	Epn2	0	61400425	61400500	61400437	20	56	10.3
11	62245075	62248150	1	chr11_62245075	Ncor1	0	62246725	62247050	62246862	45	413	58.5
11	62445525	62447575	1	chr11_62445525	BC025076	0	62446425	62446525	62446437	13	50	9.4
11	63083000	63089525	1	chr11_63083000	Pmp22	0	63088150	63088225	63088162	13	39	3.1
11	63165525	63167600	1	chr11_63165525	Pmp22	0	63166400	63166625	63166512	35	245	36.6
11	63269675	63274000	1	chr11_63269675	Pmp22	0	63272600	63272775	63272712	26	165	20.7
11	63712600	63718125	1	chr11_63712600	Cox10	0	63714325	63715000	63714462	31	683	93.8
11	63766825	63774475	1	chr11_63766825	Cox10	0	63773100	63773125	63773112	17	17	3.4
11	64924075	64927350	1	chr11_64924075	Myocd	0	64926250	64926425	64926337	23	137	18.2
11	66744175	66751750	1	chr11_66744175	A730055C05Rik	0	66748925	66749375	66749112	50	610	62.8
11	66782650	66783775	1	chr11_66782650	A530088H08Rik	0	66783425	66783450	66783437	15	15	2.8
11	67160400	67162950	1	chr11_67160400	Myh8	0	67161800	67162275	67162162	23	326	53.5
11	67195350	67197975	1	chr11_67195350	Myh13	0	67196625	67196675	67196637	16	32	5.3
11	69267650	69270150	1	chr11_69267650	Jmjd3	0	69268325	69268450	69268387	19	91	14.7
11	69284475	69287575	1	chr11_69284475	Jmjd3	0	69286675	69286850	69286812	19	121	14.2
11	69380025	69380750	1	chr11_69380025	Efnb3	0	69380575	69380900	69380737	89	789	51.4
11	69414700	69418850	1	chr11_69414700	Trp53	0	69416525	69416600	69416587	20	54	9.5
11	71578275	71583975	1	chr11_71578275	Aipl1	0	71581675	71581725	71581687	19	34	5.7
11	72215500	72220025	1	chr11_72215500	D130058I21Rik	0	72218100	72218225	72218112	17	76	11
11	72385650	72386475	1	chr11_72385650	9830002I17Rik	0	72385975	72386150	72386087	25	145	19.8
11	72766825	72771350	1	chr11_72766825	Atp2a3	0	72770125	72770175	72770137	14	28	2.9
11	72959775	72964975	1	chr11_72959775	Gsg2	0	72962350	72962425	72962412	17	43	8.4
11	75435050	75444925	1	chr11_75435050	Pps	0	75441525	75441625	75441587	16	57	8.2
11	76132850	76144600	1	chr11_76132850	Rnmtl1	0	76136025	76136275	76136162	40	326	40.2
11	76164125	76174925	1	chr11_76164125	Timm22	0	76167400	76167850	76167662	112	1326	76.2
11	76297750	76303800	1	chr11_76297750	Timm22	0	76299425	76299700	76299562	31	261	36.9
11	77494600	77497950	1	chr11_77494600	Nufip2	0	77496275	77496650	77496462	153	1419	72.1
11	77553350	77557700	1	chr11_77553350	Cryba1	0	77554725	77555150	77555012	88	842	62.1
11	77729350	77734475	1	chr11_77729350	Sez6	0	77733075	77733200	77733112	19	91	14.7
11	77763225	77764425	1	chr11_77763225	Phf12	0	77764100	77764425	77764287	84	722	51.3
11	77953200	77954550	1	chr11_77953200	Traf4	0	77954000	77954100	77954087	17	62	11.3
11	78792900	78795175	1	chr11_78792900	Nos2	0	78794475	78794550	78794537	18	49	8.8
11	78902775	78915325	1	chr11_78902775	Lgals9	0	78912075	78912275	78912162	21	142	20
11	79450675	79453325	1	chr11_79450675	Rab11fip4	0	79452350	79452475	79452437	25	115	20.4
11	79454525	79464850	1	chr11_79454525	Nf1	0	79462600	79462950	79462812	80	742	62.8
11	79946500	79950375	1	chr11_79946500	1110002N22Rik	0	79948075	79948475	79948337	61	625	47.3
11	80150550	80154125	1	chr11_80150550	5730455P16Rik	0	80152000	80152225	80152087	41	301	35.1
11	80704925	80707425	1	chr11_80704925	Spaca3	0	80705525	80706050	80705762	67	750	65.6
11	80947975	80952275	1	chr11_80947975	Spaca3	0	80950300	80950500	80950362	26	172	11.2
11	81428075	81432575	1	chr11_81428075	1700071K01Rik	0	81429150	81429500	81429312	108	986	61.7
11	82446500	82448925	1	chr11_82446500	Cct6b	0	82447750	82447825	82447762	14	41	5.3
11	82651500	82655125	1	chr11_82651500	Rffl	0	82651775	82652025	82651937	39	300	31.6
11	83790025	83791725	1	chr11_83790025	Ddx52	0	83790675	83791050	83790837	70	659	37.8
11	84085325	84087225	1	chr11_84085325	Flj39647	0	84086200	84086325	84086287	15	69	10.1
11	84093150	84094250	1	chr11_84093150	Flj39647	0	84093125	84093375	84093262	34	275	36
11	84512975	84515550	1	chr11_84512975	Mrm1	0	84513825	84514075	84513987	30	204	28.3
11	85054325	85058000	1	chr11_85054325	Appbp2	0	85057500	85057600	85057512	20	70	13.4
11	85058325	85060375	1	chr11_85058325	Appbp2	0	85059525	85059725	85059637	39	266	41.3
11	85529950	85532450	1	chr11_85529950	Tbx2	0	85530700	85531000	85530837	42	390	41.5
11	86649425	86653175	1	chr11_86649425	Dhx40	0	86651025	86651600	86651212	43	791	79
11	87268975	87270950	1	chr11_87268975	Rad51c	0	87269950	87269975	87269962	13	13	2.2
11	87841225	87846025	1	chr11_87841225	Sfrs1	0	87844450	87844675	87844487	23	186	22.3
11	88207675	88212300	1	chr11_88207675	Mrps23	0	88207850	88207875	88207862	13	13	2.4
11	88217775	88225075	1	chr11_88217775	Mrps23	0	88222975	88223075	88223062	17	64	11.9
11	88348600	88352025	1	chr11_88348600	Akap1	0	88350475	88350800	88350662	96	814	50.7
11	88379975	88384175	1	chr11_88379975	Akap1	0	88383500	88383525	88383512	22	22	4.3
11	88396975	88403625	1	chr11_88396975	Akap1	0	88399350	88399850	88399687	70	964	111.4
11	88432600	88448000	1	chr11_88432600	Akap1	0	88445925	88446475	88446087	94	1170	61.7
11	88481275	88488500	1	chr11_88481275	Akap1	0	88487100	88487425	88487262	44	442	49.7
11	88503425	88509075	1	chr11_88503425	Akap1	0	88505675	88506525	88506262	49	933	135.5
11	88654425	88666200	1	chr11_88654425	Scpep1	0	88664775	88665025	88664887	35	277	30.3
11	88743250	88751575	1	chr11_88743250	Coil	0	88747925	88748100	88748012	36	234	38
11	88809550	88811100	1	chr11_88809550	Trim25	0	88809875	88810100	88809912	27	197	26.1
11	93788775	93789775	1	chr11_93788775	Nme1	0	93789025	93789050	93789037	14	14	2.5
11	94773250	94775975	1	chr11_94773250	Sgca	0	94774625	94774650	94774637	13	13	2.4
11	95410200	95417625	1	chr11_95410200	Ngfr	0	95414325	95414500	95414412	19	116	15.8
11	95518050	95524875	1	chr11_95518050	Phb	0	95521225	95521300	95521262	24	68	10.9
11	95584125	95585800	1	chr11_95584125	Zfp652	0	95584275	95584425	95584362	20	103	13.8
11	96576025	96577050	1	chr11_96576025	Snx11	0	96576300	96576525	96576362	46	335	56.8
11	96595750	96598050	1	chr11_96595750	Snx11	0	96596350	96596675	96596512	97	840	50.6
11	96714875	96717225	1	chr11_96714875	Cdk5rap3	0	96715675	96715875	96715837	22	156	26.5
11	97381775	97387575	1	chr11_97381775	E130012A19Rik	0	97385275	97385550	97385437	49	397	37.6
11	97720875	97722650	1	chr11_97720875	Fbxo47	0	97722325	97722375	97722337	17	31	5.7
11	98187350	98188900	1	chr11_98187350	Tcap	0	98187700	98187875	98187787	16	107	12.1
11	100349600	100350500	1	chr11_100349600	Acly	0	100350100	100350325	100350212	29	195	31.4
11	100496800	100499500	1	chr11_100496800	D11Lgp2e	0	100498700	100498825	100498737	31	143	24.9
11	100813250	100817075	1	chr11_100813250	Atp6v0a1	0	100815450	100815675	100815562	41	308	42.3
11	101049575	101050650	1	chr11_101049575	Ezh1	0	101050250	101050550	101050412	59	508	48.7
11	101294775	101297525	1	chr11_101294775	Brca1	0	101295375	101295775	101295512	32	325	47.5
11	101473300	101474400	1	chr11_101473300	Arl4d	0	101474375	101474700	101474512	32	312	20.4
11	101511125	101514025	1	chr11_101511125	Arl4d	0	101512400	101512600	101512462	26	174	24.2
11	101583800	101588950	1	chr11_101583800	Dhx8	0	101588675	101588825	101588737	36	197	32.3
11	102909425	102915075	1	chr11_102909425	Acbd4	0	102911400	102911600	102911487	26	178	25.8
11	103805250	103806700	1	chr11_103805250	Arf2	0	103806175	103806300	103806237	19	86	10.8
11	107164500	107177825	1	chr11_107164500	Psmd12	0	107174425	107174475	107174437	13	26	4.5
11	107246875	107254300	1	chr11_107246875	Psmd12	0	107251750	107252000	107251937	34	266	39
11	109167450	109168675	1	chr11_109167450	Gna13	0	109167700	109167850	109167812	19	97	14.8
11	112936025	112938250	1	chr11_112936025	Slc39a11	0	112936725	112936925	112936837	22	145	15.9
11	113578400	113583400	1	chr11_113578400	Cdc42ep4	0	113579750	113579825	113579812	22	64	12.7
11	114382825	114385200	1	chr11_114382825	Rpl38	0	114384700	114384725	114384712	21	21	3.2
11	114385875	114388325	1	chr11_114385875	Rpl38	0	114386175	114386300	114386262	17	75	8.1
11	114392950	114397250	1	chr11_114392950	Rpl38	0	114396125	114396425	114396287	45	383	44.5
11	114552750	114554450	1	chr11_114552750	Ttyh2	0	114553600	114553625	114553612	14	14	2.7
11	114687950	114694175	1	chr11_114687950	Gprc5c	0	114689075	114689275	114689187	17	121	20.7
11	114886475	114888150	1	chr11_114886475	Cd300e	0	114887125	114887475	114887262	45	435	51
11	115454675	115458025	1	chr11_115454675	Grb2	0	115454700	115454875	115454787	25	155	31
11	116141150	116148900	1	chr11_116141150	Exoc7	0	116145800	116145950	116145937	21	104	17.3
11	116401300	116404550	1	chr11_116401300	Ube2o	0	116402500	116402750	116402637	38	286	35.8
11	116628350	116631475	1	chr11_116628350	Ptdsr	0	116630300	116630325	116630312	17	17	3.4
11	116753225	116758875	1	chr11_116753225	2600014M03Rik	0	116756675	116756925	116756837	40	293	36.7
11	116815575	116821525	1	chr11_116815575	Mgat5b	0	116816275	116816600	116816437	80	728	63.5
11	116960550	116964325	1	chr11_116960550	2012-09-09	0	116963275	116963475	116963362	45	305	31.8
11	117153675	117167625	1	chr11_117153675	Sec14l1	0	117161650	117161725	117161712	21	59	9.1
11	117228875	117233025	1	chr11_117228875	2012-09-09	0	117230050	117230275	117230187	34	256	32.1
11	117251725	117256425	1	chr11_117251725	2012-09-09	0	117254675	117254825	117254712	19	103	12.7
11	117281950	117288850	1	chr11_117281950	2012-09-09	0	117285125	117285275	117285162	30	149	21.8
11	117337775	117343025	1	chr11_117337775	Tnrc6c	0	117341550	117341750	117341687	26	181	28.3
11	117358900	117361975	1	chr11_117358900	Tnrc6c	0	117360775	117360900	117360787	17	74	14.1
11	117442450	117447275	1	chr11_117442450	Tnrc6c	0	117445950	117446325	117446112	68	661	52.1
11	117848700	117854700	1	chr11_117848700	Pgs1	0	117851225	117851250	117851237	20	20	3.9
11	117956200	117958000	1	chr11_117956200	Pscd1	0	117956975	117957150	117957062	26	157	26.5
11	118365725	118370400	1	chr11_118365725	D230014K01Rik	0	118367900	118368100	118367937	34	235	36.3
11	118425025	118426300	1	chr11_118425025	D230014K01Rik	0	118426275	118426325	118426312	14	27	4.3
11	119388500	119389650	1	chr11_119388500	Nptx1	0	119388625	119388725	119388662	16	60	7.5
11	119399700	119403275	1	chr11_119399700	4932417H02Rik	0	119400775	119400975	119400812	22	158	23.3
11	120112825	120114425	1	chr11_120112825	Bahcc1	0	120114125	120114200	120114187	18	51	9.9
11	120592375	120597200	1	chr11_120592375	Gps1	0	120596050	120596250	120596137	32	212	22.5
11	120620700	120624250	1	chr11_120620700	Dus1l	0	120621825	120621975	120621962	23	110	19
11	120664550	120672725	1	chr11_120664550	Fasn	0	120669875	120670000	120669962	16	73	9.2
10	4784200	4787150	1	chr10_4784200	Syne1	0	4785750	4785925	4785787	26	150	19
10	5852075	5856825	1	chr10_5852075	1700052N19Rik	0	5853275	5853400	5853312	26	121	22.9
10	6202725	6205150	1	chr10_6202725	Akap12	0	6202800	6203000	6202887	29	202	38.5
10	6237275	6241375	1	chr10_6237275	Plekhg1	0	6240425	6240600	6240487	28	169	23
10	6283675	6286800	1	chr10_6283675	Plekhg1	0	6285300	6285325	6285312	14	14	2.8
10	6402400	6406950	1	chr10_6402400	Mthfd1l	0	6405200	6405425	6405362	19	146	20.5
10	6452950	6455975	1	chr10_6452950	Mthfd1l	0	6454300	6454775	6454537	145	1569	90.6
10	7173375	7174800	1	chr10_7173375	Lrp11	0	7173150	7173525	7173187	21	222	13.3
10	7300625	7302325	1	chr10_7300625	Pcmt1	0	7301900	7302100	7302012	20	137	9.9
10	7804025	7806575	1	chr10_7804025	Ust	0	7804725	7804825	7804787	19	68	9.4
10	8521950	8524525	1	chr10_8521950	Ust	0	8523025	8523075	8523037	14	28	4.7
10	12179600	12181050	1	chr10_12179600	Sf3b5	0	12179975	12180150	12180037	25	155	27.8
10	12242150	12245575	1	chr10_12242150	Sf3b5	0	12244300	12244700	12244487	87	857	39.5
10	12481025	12482975	1	chr10_12481025	Sf3b5	0	12482250	12482550	12482412	40	395	61.2
10	16927875	16928725	1	chr10_16927875	Cited2	0	16927800	16927925	16927837	19	86	13.1
10	17263950	17270300	1	chr10_17263950	Cited2	0	17269050	17269250	17269112	27	170	23.9
10	18111950	18114875	1	chr10_18111950	Hebp2	0	18112375	18112800	18112612	57	631	43.2
10	18134350	18136625	1	chr10_18134350	Hebp2	0	18135325	18135675	18135587	28	307	52.9
10	18897425	18900175	1	chr10_18897425	Olig3	0	18897400	18897900	18897662	91	937	67.5
10	19841150	19846750	1	chr10_19841150	Map3k5	0	19843025	19843300	19843112	43	379	55.2
10	20731400	20733025	1	chr10_20731400	Myb	0	20732375	20732400	20732387	15	15	2.5
10	20742250	20746750	1	chr10_20742250	Myb	0	20746375	20746450	20746387	15	43	7.7
10	20779525	20783800	1	chr10_20779525	Ahi1	0	20780425	20780675	20780537	43	327	37.4
10	20788350	20793700	1	chr10_20788350	Ahi1	0	20791275	20791800	20791562	251	2698	112.8
10	20798350	20801100	1	chr10_20798350	Myb	0	20799175	20799525	20799387	66	622	52.9
10	20816700	20820400	1	chr10_20816700	Ahi1	0	20820250	20820800	20820462	65	762	85.3
10	21433525	21437225	1	chr10_21433525	Sgk	0	21435350	21435950	21435612	210	2303	84.1
10	21512850	21521575	1	chr10_21512850	Sgk	0	21518500	21518975	21518737	61	829	100.7
10	21624350	21627750	1	chr10_21624350	Sgk	0	21626875	21627025	21626937	18	95	17.7
10	21676875	21679150	1	chr10_21676875	Sgk	0	21677825	21678325	21678112	91	1147	70.5
10	21744425	21745875	1	chr10_21744425	4930444G20Rik	0	21744800	21745100	21744937	38	330	21.9
10	23500925	23503700	1	chr10_23500925	Rps12	0	23502475	23502825	23502662	88	841	66.5
10	24278800	24283000	1	chr10_24278800	Ctgf	0	24280650	24280700	24280687	16	31	5.9
10	24304450	24306100	1	chr10_24304450	Ctgf	0	24305275	24305475	24305362	27	185	22.3
10	24492725	24497875	1	chr10_24492725	Crsp3	0	24495150	24495400	24495237	29	224	23.6
10	24499550	24503275	1	chr10_24499550	Crsp3	0	24502200	24502450	24502312	19	159	26.5
10	24551825	24555075	1	chr10_24551825	Crsp3	0	24552825	24552900	24552862	15	43	5.2
10	26327000	26327750	1	chr10_26327000	Arhgap18	0	26327550	26327850	26327687	47	414	34.5
10	27679400	27684075	1	chr10_27679400	Ptprk	0	27683750	27684175	27683987	105	964	46.1
10	27697675	27703600	1	chr10_27697675	Ptprk	0	27703025	27703150	27703087	15	67	10.5
10	27774450	27779425	1	chr10_27774450	Lama2	0	27777175	27777650	27777312	38	525	75.1
10	28324425	28325950	1	chr10_28324425	E430004N04Rik	0	28325525	28325725	28325612	21	138	14.5
10	30317050	30317950	1	chr10_30317050	Hint3	0	30317025	30317350	30317187	44	408	38.3
10	30418075	30423475	1	chr10_30418075	Ncoa7	0	30423025	30423325	30423137	28	263	30.9
10	30462475	30463425	1	chr10_30462475	Ncoa7	0	30462675	30462975	30462812	60	522	58.8
10	33917700	33924375	1	chr10_33917700	Sart2	0	33923500	33923700	33923587	38	256	40.9
10	36300075	36302050	1	chr10_36300075	Hdac2	0	36300925	36301225	36301037	34	309	27.5
10	36900950	36902375	1	chr10_36900950	Marcks	0	36901850	36902225	36902012	90	876	43.4
10	38796475	38798150	1	chr10_38796475	1700025K23Rik	0	38796300	38796625	38796462	46	391	40.2
10	38898325	38899700	1	chr10_38898325	Tube1	0	38899275	38899475	38899337	19	125	13.1
10	38914125	38914800	1	chr10_38914125	Tube1	0	38913950	38914175	38914037	26	206	29.5
10	39278800	39283025	1	chr10_39278800	Traf3ip2	0	39281950	39282200	39282112	26	205	19.6
10	40051200	40056075	1	chr10_40051200	Amd1	0	40054150	40054325	40054237	27	175	29
10	41155050	41156225	1	chr10_41155050	Mical1	0	41155775	41156125	41155937	52	544	51
10	41932625	41937800	1	chr10_41932625	Lace1	0	41934900	41935125	41934987	23	172	24.7
10	42730700	42732225	1	chr10_42730700	Scml4	0	42731850	42732175	42732012	61	533	42.6
10	42963550	42968450	1	chr10_42963550	5330439J01Rik	0	42964775	42964950	42964812	20	111	13.4
10	43237800	43240475	1	chr10_43237800	1700021F05Rik	0	43240075	43240150	43240087	31	92	17.7
10	43626625	43628925	1	chr10_43626625	Aim1	0	43627525	43627825	43627637	38	354	24
10	44076625	44083675	1	chr10_44076625	Atg5	0	44080175	44080700	44080512	47	657	87.8
10	44097425	44099175	1	chr10_44097425	Prdm1	0	44098775	44099000	44098887	25	176	24.6
10	44171425	44172550	1	chr10_44171425	Prdm1	0	44171350	44171625	44171487	24	225	36.6
10	44372925	44375525	1	chr10_44372925	Prdm1	0	44372850	44373050	44372937	20	138	13
10	44386175	44389550	1	chr10_44386175	Prdm1	0	44388100	44388475	44388287	31	352	40.1
10	44777725	44782125	1	chr10_44777725	Popdc3	0	44780750	44781000	44780962	41	343	39.2
10	45134525	45134900	1	chr10_45134525	Lin28b	0	45134650	45134975	45134837	39	353	50.8
10	46419200	46420175	1	chr10_46419200	Hace1	0	46419000	46419250	46419112	26	198	17
10	46502575	46503775	1	chr10_46502575	Hace1	0	46503375	46503575	46503412	27	178	19.6
10	51933175	51935625	1	chr10_51933175	Ros1	0	51934625	51934875	51934687	25	198	21.6
10	51962475	51965525	1	chr10_51962475	Gopc	0	51962225	51962900	51962662	86	1186	88.5
10	51984000	51986675	1	chr10_51984000	Gopc	0	51984425	51984525	51984462	14	54	9.8
10	53100850	53101850	1	chr10_53100850	Pln	0	53101400	53101575	53101462	17	108	10.3
10	57180125	57180875	1	chr10_57180125	Hsf2	0	57180625	57180925	57180737	47	408	28.1
10	57924150	57926825	1	chr10_57924150	Ranbp2	0	57926775	57926925	57926812	16	87	9.8
10	58951200	58955775	1	chr10_58951200	Ccdc109a	0	58954000	58954225	58954137	37	260	37.1
10	59148300	59149650	1	chr10_59148300	Cbara1	0	59149600	59149700	59149637	18	66	11.7
10	59352100	59353575	1	chr10_59352100	Ddit4	0	59353300	59353625	59353437	92	808	59.5
10	59368475	59370750	1	chr10_59368475	Ddit4	0	59369650	59369950	59369787	44	424	61.7
10	59536150	59537800	1	chr10_59536150	Spock2	0	59537125	59537500	59537312	86	781	44.4
10	59560300	59563000	1	chr10_59560300	Chst3	0	59561475	59562175	59561637	53	740	103.2
10	60118750	60124700	1	chr10_60118750	Cdh23	0	60122850	60123025	60122887	15	94	12.7
10	60174525	60180500	1	chr10_60174525	Slc29a3	0	60179000	60179275	60179112	31	257	38.8
10	60635000	60638825	1	chr10_60635000	1700021K02Rik	0	60637475	60637725	60637612	35	267	35.5
10	60643200	60645825	1	chr10_60643200	Prf1	0	60645375	60645650	60645462	33	278	37.3
10	60709875	60712075	1	chr10_60709875	Prf1	0	60711350	60711375	60711362	18	18	3.2
10	60745125	60748300	1	chr10_60745125	Prf1	0	60746725	60746900	60746787	35	209	34.2
10	60759725	60767225	1	chr10_60759725	X99384	0	60761425	60761450	60761437	16	16	2.7
10	60767600	60771875	1	chr10_60767600	X99384	0	60770725	60770850	60770762	19	87	14.5
10	61321225	61327800	1	chr10_61321225	H2afy2	0	61324375	61324575	61324512	39	262	33.9
10	61407425	61408900	1	chr10_61407425	Col13a1	0	61407800	61407975	61407837	21	129	20
10	61427425	61434375	1	chr10_61427425	Col13a1	0	61432125	61432300	61432237	19	113	13
10	61635875	61638600	1	chr10_61635875	Tspan15	0	61637775	61637850	61637787	15	42	8.1
10	62631800	62632800	1	chr10_62631800	Herc4	0	62632750	62632975	62632812	24	176	27.9
10	62743425	62744450	1	chr10_62743425	Sirt1	0	62744000	62744125	62744062	22	104	17.2
10	66312325	66313525	1	chr10_66312325	Reep3	0	66313300	66313625	66313462	34	325	34.8
10	66362025	66364925	1	chr10_66362025	Reep3	0	66364925	66365200	66365112	50	428	47.1
10	66365050	66366525	1	chr10_66365050	Reep3	0	66364925	66365200	66365112	50	428	47.1
10	66419750	66423225	1	chr10_66419750	Nrbf2	0	66421300	66421400	66421312	17	63	11.3
10	66475275	66480050	1	chr10_66475275	Nrbf2	0	66479350	66479525	66479412	36	227	34.4
10	66496025	66508100	1	chr10_66496025	Reep3	0	66495625	66496075	66495837	185	1886	75.8
10	66683275	66684275	1	chr10_66683275	Nrbf2	0	66683525	66683575	66683537	14	28	5.2
10	66853325	66855675	1	chr10_66853325	Egr2	0	66854175	66854575	66854462	48	467	61.4
10	67505825	67516750	1	chr10_67505825	Plekhk1	0	67510500	67510725	67510587	34	259	38.7
10	67536275	67539025	1	chr10_67536275	Plekhk1	0	67538000	67538025	67538012	14	14	2.1
10	68428925	68430150	1	chr10_68428925	Rhobtb1	0	68428850	68429150	68429012	28	259	31.3
10	69525775	69530050	1	chr10_69525775	Ank3	0	69527500	69527525	69527512	17	17	3.2
10	69533400	69540125	1	chr10_69533400	Slc16a9	0	69539575	69539625	69539587	14	28	5
10	69719775	69721800	1	chr10_69719775	Slc16a9	0	69720875	69721150	69721062	35	299	32.1
10	69752625	69753475	1	chr10_69752625	Slc16a9	0	69753450	69753475	69753462	13	13	2.4
10	69753750	69767150	1	chr10_69753750	1200015N20Rik	0	69754850	69755050	69754962	28	201	24.3
10	70842900	70844050	1	chr10_70842900	Ipmk	0	70843575	70843950	70843762	34	378	45.8
10	74627825	74629300	1	chr10_74627825	4932439K10Rik	0	74628075	74628150	74628137	15	42	5.9
10	75292175	75296250	1	chr10_75292175	Mif	0	75294850	75294875	75294862	13	13	2.5
10	75444050	75446900	1	chr10_75444050	EG333669	0	75446450	75446650	75446487	24	167	20.9
10	75487275	75492625	1	chr10_75487275	Zfp280b	0	75489075	75489325	75489187	55	414	48.6
10	76262450	76263750	1	chr10_76262450	Col6a1	0	76263175	76263300	76263212	16	71	11.6
10	76459450	76461625	1	chr10_76459450	Slc19a1	0	76460300	76460375	76460312	21	63	11.2
10	76579750	76584075	1	chr10_76579750	Col18a1	0	76582150	76582325	76582237	21	127	14.8
10	76631300	76646700	1	chr10_76631300	Col18a1	0	76642950	76643200	76643037	40	324	40.4
10	77660850	77665275	1	chr10_77660850	Agpat3	0	77663050	77663175	77663062	28	120	21.2
10	77727125	77730825	1	chr10_77727125	Nnp1	0	77729575	77729775	77729662	19	139	23.5
10	77767450	77773250	1	chr10_77767450	Agpat3	0	77770675	77770950	77770812	53	441	41.1
10	78803300	78804425	1	chr10_78803300	EG624845	0	78803100	78803300	78803262	21	151	6.1
10	80482200	80487275	1	chr10_80482200	Creb3l3	0	80485525	80485800	80485612	40	330	52.5
10	80767550	80771825	1	chr10_80767550	F630110N24Rik	0	80768875	80769075	80768962	17	119	19
10	82770825	82772925	1	chr10_82770825	Slc41a2	0	82772250	82772300	82772287	20	38	7
10	82773425	82775200	1	chr10_82773425	Slc41a2	0	82774050	82774275	82774137	40	305	37.6
10	82775725	82776900	1	chr10_82775725	Slc41a2	0	82775775	82776125	82776012	50	503	61.6
10	83812525	83820050	1	chr10_83812525	Ckap4	0	83819475	83819650	83819537	21	125	17.9
10	83845425	83850750	1	chr10_83845425	Ckap4	0	83848200	83848525	83848362	42	365	26.5
10	83954650	83958525	1	chr10_83954650	Tcp11l2	0	83956175	83956375	83956262	25	184	20.5
10	83982625	83986150	1	chr10_83982625	Ckap4	0	83984400	83984800	83984587	67	677	46.9
10	84292100	84294400	1	chr10_84292100	Ric8b	0	84292775	84292925	84292812	26	137	21.1
10	84479825	84481350	1	chr10_84479825	Fhl4	0	84481325	84481500	84481387	16	106	17.3
10	84501550	84502650	1	chr10_84501550	Fhl4	0	84501525	84501875	84501712	36	356	25
10	84896575	84898775	1	chr10_84896575	Btbd11	0	84897350	84897525	84897437	30	178	23.7
10	84933575	84946525	1	chr10_84933575	Btbd11	0	84937425	84937775	84937612	54	519	42.2
10	84966025	84976475	1	chr10_84966025	Btbd11	0	84973075	84973450	84973262	48	502	46.8
10	84999250	85002550	1	chr10_84999250	Btbd11	0	85000325	85000375	85000337	16	32	6
10	85446875	85450175	1	chr10_85446875	Fbxo7	0	85448725	85448925	85448812	19	139	16.3
10	86198625	86202500	1	chr10_86198625	C630002B14Rik	0	86199600	86199900	86199762	65	539	50.3
10	86876075	86878400	1	chr10_86876075	Ascl1	0	86877575	86877900	86877737	36	343	38.1
10	87355550	87356950	1	chr10_87355550	Igf1	0	87356925	87357350	87357162	95	972	53.3
10	87976150	87978975	1	chr10_87976150	Chpt1	0	87977475	87977675	87977587	27	192	29.6
10	88113900	88115025	1	chr10_88113900	Spic	0	88114775	88115100	88114937	84	739	56.3
10	88137725	88140775	1	chr10_88137725	Arl1	0	88138575	88138900	88138737	70	598	57.1
10	92595150	92596925	1	chr10_92595150	Pctk2	0	92595725	92595825	92595737	33	128	23.6
10	92617300	92621250	1	chr10_92617300	Elk3	0	92618300	92618575	92618412	37	312	35.9
10	92793175	92796175	1	chr10_92793175	Elk3	0	92794250	92794575	92794387	83	713	55.3
10	93526000	93528150	1	chr10_93526000	Nr2c1	0	93526900	93527100	93527012	28	196	27
10	93961275	93962425	1	chr10_93961275	4921537D05Rik	0	93961200	93961375	93961312	26	145	22.6
10	94603625	94607800	1	chr10_94603625	Plxnc1	0	94605200	94605325	94605237	24	104	17.2
10	94647275	94650250	1	chr10_94647275	Socs2	0	94650175	94650575	94650412	106	1018	54.7
10	95024650	95028525	1	chr10_95024650	Nudt4	0	95025600	95025875	95025762	64	558	60.9
10	96058350	96063175	1	chr10_96058350	Btg1	0	96060800	96061025	96060937	30	218	26.5
10	98545250	98548750	1	chr10_98545250	Galnt4	0	98546300	98546475	98546437	18	113	12
10	98782825	98784200	1	chr10_98782825	Dusp6	0	98784050	98784250	98784062	18	128	17.3
10	106932300	106933075	1	chr10_106932300	Myf6	0	106933000	106933200	106933112	25	168	17.5
10	107686675	107701125	1	chr10_107686675	Ppp1r12a	0	107690725	107691525	107691012	80	1768	152.6
10	107806300	107809125	1	chr10_107806300	Syt1	0	107807550	107807775	107807637	24	178	23.3
10	110281700	110286075	1	chr10_110281700	Csrp2	0	110282900	110283000	110282962	18	67	12.8
10	111245975	111247700	1	chr10_111245975	Krr1	0	111246200	111246375	111246312	27	161	26.4
10	111317275	111318750	1	chr10_111317275	Krr1	0	111317525	111317750	111317662	38	275	31.4
10	114603575	114605575	1	chr10_114603575	Tph2	0	114605425	114605750	114605612	33	329	39.4
10	115786025	115788100	1	chr10_115786025	Kcnmb4	0	115787050	115787325	115787187	35	305	25.8
10	115966600	115970150	1	chr10_115966600	Kcnmb4	0	115966175	115966675	115966462	277	2772	82
10	117141500	117142625	1	chr10_117141500	Nup107	0	117141750	117141950	117141812	26	168	22.5
10	117206275	117216775	1	chr10_117206275	Rap1b	0	117209000	117209325	117209137	65	575	53.2
10	117354250	117359125	1	chr10_117354250	Rap1b	0	117356100	117356425	117356262	77	699	64.9
10	119925400	119926325	1	chr10_119925400	Hmga2	0	119926075	119926350	119926212	44	344	40.2
10	120806225	120807150	1	chr10_120806225	Gns	0	120807050	120807275	120807187	38	255	19.6
10	120903350	120905225	1	chr10_120903350	Rassf3	0	120904500	120904575	120904512	15	42	8.2
10	121302175	121302975	1	chr10_121302175	Srgap1	0	121302825	121303050	121302887	22	159	25.4
10	126359975	126361400	1	chr10_126359975	Ctdsp2	0	126360850	126360900	126360887	15	29	5.2
10	126372575	126377400	1	chr10_126372575	Ctdsp2	0	126374900	126375125	126375012	29	225	35.8
10	126627700	126629400	1	chr10_126627700	Kif5a	0	126628200	126628500	126628337	65	526	47.5
10	126992050	126996625	1	chr10_126992050	Stat6	0	126993375	126993425	126993412	21	38	6.8
10	127587200	127591725	1	chr10_127587200	Rbms2	0	127590200	127590525	127590287	60	561	67.9
10	128033475	128037575	1	chr10_128033475	Rps26	0	128034575	128034800	128034712	38	280	34.6
10	129696000	129698075	1	chr10_129696000	Neurod4	0	129696675	129696975	129696837	51	448	44.4
13	5548325	5551375	1	chr13_5548325	Klf6	0	5549525	5549875	5549712	25	262	25
13	6630950	6640775	1	chr13_6630950	Pitrm1	0	6637875	6637900	6637887	14	14	2.4
13	9307925	9308375	1	chr13_9307925	Larp5	0	9308050	9308400	9308237	50	488	48.3
13	11965100	11966325	1	chr13_11965100	Ryr2	0	11966250	11966450	11966362	28	172	26.4
13	11986975	11991325	1	chr13_11986975	Mtr	0	11988375	11988575	11988537	23	169	5
13	12491900	12496625	1	chr13_12491900	Edaradd	0	12495175	12495500	12495362	67	583	48.7
13	13847825	13848400	1	chr13_13847825	Ggps1	0	13847850	13848000	13847962	21	116	21.5
13	16553925	16555650	1	chr13_16553925	AF397014	0	16554675	16554950	16554787	36	314	34.5
13	16614250	16615450	1	chr13_16614250	AF397014	0	16615425	16615775	16615612	63	551	16.3
13	19635675	19639950	1	chr13_19635675	Epdr1	0	19638525	19638650	19638562	16	77	5.7
13	20103625	20107500	1	chr13_20103625	Elmo1	0	20104950	20105150	20105062	29	213	40.9
13	20120225	20125250	1	chr13_20120225	Elmo1	0	20121075	20121125	20121087	13	26	2.5
13	20180400	20183575	1	chr13_20180400	Elmo1	0	20182075	20182275	20182162	31	203	30.9
13	20604600	20610050	1	chr13_20604600	Aoah	0	20607750	20608025	20607912	59	499	53.1
13	20991825	20994750	1	chr13_20991825	Olfr1370	0	20992900	20993225	20993062	41	351	17.2
13	22999750	23000675	1	chr13_22999750	V1rh6	0	23000275	23000525	23000362	34	274	30.2
13	23032150	23032450	1	chr13_23032150	V1rh5	0	23032325	23032575	23032437	37	290	13.1
13	23600275	23605125	1	chr13_23600275	Hist1h4d	0	23603125	23603300	23603187	25	158	24.4
13	24008625	24010600	1	chr13_24008625	Lrrc16	0	24009350	24009600	24009462	34	271	34.2
13	24524500	24526550	1	chr13_24524500	Cmah	0	24525375	24525625	24525487	27	216	14.2
13	28786575	28788425	1	chr13_28786575	Sox4	0	28787975	28788275	28788137	67	573	63.3
13	28819000	28820225	1	chr13_28819000	Sox4	0	28819000	28819325	28819187	38	375	39.9
13	29216500	29218625	1	chr13_29216500	Cdkal1	0	29218225	29218425	29218237	26	184	35.8
13	30075750	30078125	1	chr13_30075750	Mboat1	0	30076850	30077225	30077037	154	1381	57.1
13	31299475	31301250	1	chr13_31299475	Foxq1	0	31300275	31300500	31300387	20	155	15.8
13	33912375	33914125	1	chr13_33912375	Serpinb6a	0	33913175	33913250	33913212	19	55	9.2
13	34115600	34120275	1	chr13_34115600	Tubb2b	0	34117275	34117650	34117462	47	503	47.3
13	34245200	34248275	1	chr13_34245200	2310047M15Rik	0	34245925	34246075	34246037	23	120	18.2
13	34250475	34258050	1	chr13_34250475	2310047M15Rik	0	34256325	34256700	34256537	85	844	67.9
13	34293075	34297050	1	chr13_34293075	2310047M15Rik	0	34294925	34295300	34295112	45	529	63.4
13	34749225	34750850	1	chr13_34749225	1300014I06Rik	0	34749375	34749575	34749437	31	202	22.1
13	35858500	35865900	1	chr13_35858500	Rpp40	0	35860375	35860950	35860762	102	1184	91.1
13	37443675	37451375	1	chr13_37443675	Ly86	0	37443625	37444100	37443837	107	1164	79.3
13	37524750	37525775	1	chr13_37524750	Ly86	0	37524875	37525175	37525012	53	452	37.6
13	37524800	37525775	1	chr13_37524800	Ly86	0	37524875	37525175	37525012	53	452	37.6
13	37842725	37846900	1	chr13_37842725	Rreb1	0	37844875	37845075	37844937	29	188	29.5
13	40659850	40661975	1	chr13_40659850	Tcfap2a	0	40660450	40661125	40660987	30	466	75.8
13	40878575	40884850	1	chr13_40878575	Gcnt2	0	40879950	40880350	40880187	41	490	46.4
13	40947625	40959400	1	chr13_40947625	Pak1ip1	0	40955575	40955600	40955587	21	21	4.2
13	41155250	41158050	1	chr13_41155250	Gcm2	0	41156475	41156700	41156512	23	175	15.4
13	42159925	42161550	1	chr13_42159925	Edn1	0	42161000	42161175	42161112	22	136	19.6
13	43304700	43308500	1	chr13_43304700	Gfod1	0	43306700	43306775	43306762	25	70	10.9
13	43918050	43921175	1	chr13_43918050	Cd83	0	43919625	43919650	43919637	13	13	2.1
13	44027550	44033750	1	chr13_44027550	Cd83	0	44029700	44030100	44029912	127	1237	68.4
13	44684200	44689650	1	chr13_44684200	Jarid2	0	44689475	44689650	44689537	33	187	26.7
13	44731125	44736375	1	chr13_44731125	Jarid2	0	44733050	44733525	44733312	61	790	90.2
13	44757125	44767975	1	chr13_44757125	Dtnbp1	0	44762625	44763025	44762812	98	1012	64.8
13	47866100	47868875	1	chr13_47866100	Id4	0	47866850	47867125	47867012	35	284	23.2
13	48182500	48184875	1	chr13_48182500	Id4	0	48183550	48183725	48183687	19	114	19.4
13	48256550	48258725	1	chr13_48256550	Id4	0	48257250	48257300	48257287	15	28	5.2
13	48262950	48265550	1	chr13_48262950	Id4	0	48264450	48264850	48264637	67	664	52.8
13	48335400	48337500	1	chr13_48335400	Id4	0	48336225	48336350	48336312	35	154	26.7
13	48867500	48871575	1	chr13_48867500	BC010304	0	48868500	48868675	48868537	15	100	14.5
13	49193100	49194125	1	chr13_49193100	Ninj1	0	49193725	49193925	49193837	25	166	19.4
13	50464825	50467550	1	chr13_50464825	Gm806	0	50466050	50466275	50466137	34	246	32.3
13	50471225	50473050	1	chr13_50471225	Gm806	0	50472975	50473175	50473037	23	164	8.5
13	51061425	51067400	1	chr13_51061425	Spin1	0	51065100	51065150	51065112	16	32	4.9
13	51131800	51139400	1	chr13_51131800	Spin	0	51137900	51138225	51138062	58	496	44.7
13	51390075	51392925	1	chr13_51390075	Edg3	0	51390775	51390800	51390787	14	14	2.5
13	51929000	51934875	1	chr13_51929000	Gadd45g	0	51933125	51933800	51933487	49	1013	110.2
13	52234300	52236425	1	chr13_52234300	Diras2	0	52235625	52235650	52235637	21	21	4.2
13	52573200	52577500	1	chr13_52573200	Diras2	0	52574550	52575175	52574762	149	1612	81.7
13	52921625	52924800	1	chr13_52921625	Nfil3	0	52923725	52923925	52923787	21	139	16.9
13	53187000	53198750	1	chr13_53187000	Sptlc1	0	53196675	53196825	53196687	14	84	11
13	53219225	53221225	1	chr13_53219225	Sptlc1	0	53219800	53219850	53219812	13	26	3.9
13	53371175	53374700	1	chr13_53371175	Ror2	0	53372625	53372800	53372662	17	111	10.8
13	54166400	54171425	1	chr13_54166400	Hrh2	0	54168950	54169275	54169087	42	381	47.3
13	54223550	54229300	1	chr13_54223550	Sfxn1	0	54225525	54225950	54225687	72	900	95.9
13	54827325	54828725	1	chr13_54827325	Tspan17	0	54828250	54828400	54828362	16	85	10.8
13	55208150	55214075	1	chr13_55208150	Nsd1	0	55208600	55208625	55208612	19	19	3.8
13	55254400	55259200	1	chr13_55254400	Rab24	0	55257050	55257250	55257112	43	297	42.6
13	55344625	55349200	1	chr13_55344625	Lman2	0	55347975	55348000	55347987	13	13	2.5
13	56149975	56156225	1	chr13_56149975	H2afy	0	56152825	56153275	56153037	118	1371	105.4
13	56217600	56219325	1	chr13_56217600	BC027057	0	56218275	56218300	56218287	13	13	1.5
13	56225000	56227400	1	chr13_56225000	Neurog1	0	56225700	56226000	56225862	55	465	36.9
13	57224875	57225950	1	chr13_57224875	Spock1	0	57225600	57225900	57225737	30	271	23.5
13	57533725	57536200	1	chr13_57533725	295	0	57535725	57535825	57535737	14	54	4.6
13	58483625	58487200	1	chr13_58483625	4932432N11Rik	0	58486225	58486325	58486287	24	89	17.2
13	58913625	58917275	1	chr13_58913625	Ntrk2	0	58914350	58914700	58914512	43	425	40.8
13	58963150	58967000	1	chr13_58963150	Ntrk2	0	58964500	58964625	58964587	19	84	13.1
13	59476450	59479700	1	chr13_59476450	Agtpbp1	0	59478200	59478275	59478212	14	39	3.8
13	59661850	59676075	1	chr13_59661850	Mak10	0	59666650	59666925	59666787	63	522	63.7
13	60620500	60631150	1	chr13_60620500	BC051665	0	60625725	60625875	60625787	23	121	19.6
13	60637600	60638500	1	chr13_60637600	Dapk1	0	60637425	60637725	60637562	35	290	35.5
13	62825600	62825825	1	chr13_62825600	Fbp2	0	62825525	62825675	62825587	17	85	10.1
13	63180050	63181825	1	chr13_63180050	262	0	63180725	63180950	63180862	33	250	24
13	63300675	63306900	1	chr13_63300675	262	0	63302925	63303025	63303012	33	113	22.1
13	63532225	63541525	1	chr13_63532225	Fancc	0	63539675	63539975	63539787	71	625	68.7
13	63547075	63556500	1	chr13_63547075	Fancc	0	63553925	63554125	63553987	21	139	9.2
13	63727100	63731325	1	chr13_63727100	0610007P08Rik	0	63729850	63730125	63730012	41	328	41.3
13	63976550	63980050	1	chr13_63976550	Sr278	0	63977925	63978200	63978087	48	407	32.5
13	63985700	63992650	1	chr13_63985700	Hsd17b3	0	63988700	63989500	63989312	75	1116	135.6
13	64579875	64581000	1	chr13_64579875	Ccrk	0	64580625	64580950	64580787	93	799	39.9
13	68296200	68298175	1	chr13_68296200	Zfp273	0	68297825	68298225	68298037	40	451	18.2
13	69035575	69037600	1	chr13_69035575	Mtrr	0	69035575	69035725	69035612	15	87	5.6
13	70592350	70593325	1	chr13_70592350	Med10	0	70592200	70592525	70592362	53	444	28.8
13	73280400	73284975	1	chr13_73280400	Irx2	0	73283500	73283875	73283687	68	674	42.7
13	73317750	73320575	1	chr13_73317750	Irx2	0	73318975	73319250	73319162	25	203	37.8
13	74243400	74251025	1	chr13_74243400	Nkd2	0	74248550	74248775	74248687	33	247	37.7
13	76151575	76152375	1	chr13_76151575	Ell2	0	76151550	76151725	76151612	18	112	10.8
13	76232050	76232150	1	chr13_76232050	Ell2	0	76231825	76232575	76232312	38	760	76.5
13	76258950	76261125	1	chr13_76258950	Ell2	0	76260325	76260525	76260437	24	175	28.5
13	81360600	81362450	1	chr13_81360600	Arrdc3	0	81361100	81361200	81361162	18	61	9.5
13	81384825	81386275	1	chr13_81384825	Arrdc3	0	81385400	81385600	81385462	23	161	27.1
13	82167400	82169825	1	chr13_82167400	Lysmd3	0	82169100	82169200	82169137	24	83	13.5
13	91342175	91343725	1	chr13_91342175	Rps23	0	91343450	91343700	91343587	36	272	12.3
13	95464975	95468425	1	chr13_95464975	Scamp1	0	95466050	95466100	95466087	27	53	9.9
13	95542600	95546025	1	chr13_95542600	Scamp1	0	95544150	95544375	95544262	20	159	30.9
13	95745475	95750250	1	chr13_95745475	Ap3b1	0	95748350	95748625	95748487	37	294	43.9
13	95958275	95964900	1	chr13_95958275	Otp	0	95963350	95963450	95963387	17	61	9.2
13	96311275	96313175	1	chr13_96311275	Zbed3	0	96312150	96312350	96312237	24	162	19.6
13	96630475	96639250	1	chr13_96630475	F2rl1	0	96634850	96635300	96635112	109	1121	84.9
13	98359725	98365150	1	chr13_98359725	Enc1	0	98361500	98361650	98361512	31	163	32
13	98381900	98385900	1	chr13_98381900	Enc1	0	98383500	98383875	98383687	88	940	89
13	98390475	98394400	1	chr13_98390475	Enc1	0	98393000	98393200	98393062	23	169	20.7
13	98570025	98571350	1	chr13_98570025	Enc1	0	98570175	98570275	98570187	18	68	13.3
13	98651325	98655675	1	chr13_98651325	Enc1	0	98655550	98655800	98655687	28	224	26.5
13	98677850	98681775	1	chr13_98677850	Rgnef	0	98680300	98680450	98680437	21	103	20
13	98687125	98692275	1	chr13_98687125	Rgnef	0	98689950	98689975	98689962	14	14	2.7
13	98698300	98703700	1	chr13_98698300	Rgnef	0	98701525	98701750	98701687	28	205	19.4
13	98944725	98945725	1	chr13_98944725	Rgnef	0	98945625	98945950	98945762	45	387	18.7
13	99405300	99406550	1	chr13_99405300	Btf3	0	99406550	99406775	99406687	35	246	33.9
13	99406725	99407725	1	chr13_99406725	Btf3	0	99406550	99406775	99406687	35	246	33.9
13	100076325	100078400	1	chr13_100076325	Tnpo1	0	100077350	100077525	100077437	18	111	19.6
13	100116900	100118025	1	chr13_100116900	Tnpo1	0	100116825	100117025	100116937	20	128	17.6
13	100128375	100129675	1	chr13_100128375	Tnpo1	0	100129450	100129500	100129462	14	27	4.7
13	100136075	100141750	1	chr13_100136075	Tnpo1	0	100140600	100140675	100140612	16	44	7.3
13	100197375	100198675	1	chr13_100197375	Zfp366	0	100198125	100198175	100198162	14	27	4.5
13	100423500	100426050	1	chr13_100423500	Mrps27	0	100424175	100424325	100424262	16	86	16.1
13	100541775	100547175	1	chr13_100541775	Mrps27	0	100544625	100544925	100544762	39	383	54.7
13	100707925	100710700	1	chr13_100707925	Mtap1b	0	100709575	100709725	100709687	24	131	21.2
13	102333800	102336500	1	chr13_102333800	Slc30a5	0	102335400	102335775	102335587	80	755	47.1
13	106034950	106035125	1	chr13_106034950	A930021C24Rik	0	106034875	106035075	106034987	23	149	19.3
13	106376500	106378500	1	chr13_106376500	4933425L06Rik	0	106377000	106377775	106377287	84	1135	107.1
13	108948775	108949800	1	chr13_108948775	2810008M24Rik	0	108949575	108949900	108949737	37	303	30.3
13	110749125	110750850	1	chr13_110749125	89	0	110749525	110749700	110749637	19	117	19.6
13	110761700	110767825	1	chr13_110761700	89	0	110765000	110765300	110765137	36	327	45.4
13	110898875	110900525	1	chr13_110898875	mmu-mir-582	0	110899350	110899625	110899462	28	271	42
13	112514225	112519675	1	chr13_112514225	Gpbp1	0	112518850	112519125	112518987	31	259	29.6
13	112659950	112663600	1	chr13_112659950	Gpbp1	0	112662025	112662425	112662262	53	565	51.3
13	113059500	113061050	1	chr13_113059500	Map3k1	0	113059850	113060075	113059962	29	202	24
13	113474100	113476275	1	chr13_113474100	Il6st	0	113475150	113475225	113475187	21	59	10.8
13	113530200	113535500	1	chr13_113530200	Ankrd55	0	113533900	113533950	113533912	13	26	3.9
13	114408450	114409875	1	chr13_114408450	Esm1	0	114409150	114409425	114409287	26	203	24.9
13	114689700	114694175	1	chr13_114689700	Snag1	0	114690400	114690775	114690512	57	553	64.1
13	114848650	114852450	1	chr13_114848650	Arl15	0	114852050	114852075	114852062	13	13	2.1
13	114856400	114857825	1	chr13_114856400	Arl15	0	114857425	114857450	114857437	31	31	5.6
13	114959600	114961050	1	chr13_114959600	Arl15	0	114960050	114960300	114960162	46	363	35.2
13	114970275	114973600	1	chr13_114970275	Arl15	0	114971675	114971875	114971737	29	188	29.9
13	114974450	114987075	1	chr13_114974450	Hspb3	0	114979550	114979775	114979712	33	244	38.5
13	115147525	115149500	1	chr13_115147525	Ndufs4	0	115147200	115147750	115147412	88	997	76.7
13	115168425	115172725	1	chr13_115168425	Ndufs4	0	115171525	115171775	115171612	25	193	21.4
13	115399825	115400700	1	chr13_115399825	Ndufs4	0	115399625	115399975	115399787	36	345	16.1
13	119385200	119385225	1	chr13_119385200	Mrps30	0	119385100	119385650	119385287	51	581	29.9
13	119893500	119895075	1	chr13_119893500	Mrps30	0	119894050	119894325	119894137	32	285	27.8
12	3605075	3607375	1	chr12_3605075	Asxl2	0	3606175	3606525	3606362	87	762	47.9
12	3661925	3665250	1	chr12_3661925	Dnmt3a	0	3662700	3663000	3662887	36	318	40.9
12	4571275	4573575	1	chr12_4571275	Itsn2	0	4571000	4571325	4571112	41	392	29.3
12	11079025	11080200	1	chr12_11079025	Kcns3	0	11079025	11079225	11079062	22	151	5.6
12	12201625	12205875	1	chr12_12201625	D12Ertd553e	0	12203425	12203775	12203612	99	955	54
12	12827025	12830925	1	chr12_12827025	Mycn	0	12829625	12829950	12829812	92	790	56.1
12	12843975	12849350	1	chr12_12843975	Mycn	0	12845825	12846100	12845987	49	405	50.1
12	12851450	12855050	1	chr12_12851450	Mycn	0	12854550	12854600	12854562	16	31	5.6
12	12902900	12906325	1	chr12_12902900	Mycn	0	12905400	12905575	12905512	16	96	12.7
12	12952700	12954575	1	chr12_12952700	Mycn	0	12953100	12953475	12953262	103	966	69.1
12	13012225	13014525	1	chr12_13012225	Mycn	0	13013425	13013750	13013587	38	341	48.2
12	16033450	16038350	1	chr12_16033450	Trib2	0	16034925	16035125	16034962	20	136	20
12	17298550	17300000	1	chr12_17298550	Pdia6	0	17299350	17299650	17299487	39	335	22.3
12	17582100	17583925	1	chr12_17582100	Odc1	0	17583100	17583250	17583187	25	136	21.6
12	21706250	21711475	1	chr12_21706250	Ywhaq	0	21709250	21709600	21709437	28	303	31.4
12	25312350	25313925	1	chr12_25312350	Rrm2	0	25313700	25313750	25313712	13	26	4.3
12	25478400	25484375	1	chr12_25478400	C330002I19Rik	0	25483250	25483475	25483362	31	221	25.3
12	25657975	25658275	1	chr12_25657975	Id2	0	25657875	25658300	25657937	21	301	28.3
12	25712800	25714050	1	chr12_25712800	Id2	0	25713675	25713975	25713787	49	426	41.9
12	25851025	25853925	1	chr12_25851025	Id2	0	25852675	25852850	25852762	21	125	12.7
12	27666900	27671000	1	chr12_27666900	Sox11	0	27669475	27669900	27669637	45	466	40.4
12	27725300	27727175	1	chr12_27725300	Sox11	0	27726700	27726900	27726837	20	133	20.2
12	27735875	27738700	1	chr12_27735875	Sox11	0	27737375	27737800	27737662	49	571	60.1
12	28088725	28089825	1	chr12_28088725	Sox11	0	28089550	28089625	28089562	14	40	7.4
12	29381400	29384250	1	chr12_29381400	Ttc15	0	29383350	29383550	29383437	26	170	22.3
12	29401175	29405550	1	chr12_29401175	Ttc15	0	29403675	29404000	29403837	41	380	44.1
12	29680975	29683250	1	chr12_29680975	Tssc1	0	29682075	29682375	29682187	38	344	39
12	31810950	31813125	1	chr12_31810950	Lamb1-1	0	31811550	31811650	31811587	29	113	19.1
12	32419900	32422575	1	chr12_32419900	Hbp1	0	32421525	32421850	32421662	69	589	36.6
12	33409975	33411600	1	chr12_33409975	Pbef1	0	33409900	33410150	33410062	53	406	41.8
12	33713675	33716075	1	chr12_33713675	Atxn7l1	0	33714700	33714725	33714712	15	15	2.9
12	33929150	33931250	1	chr12_33929150	Twistnb	0	33930100	33930450	33930312	32	328	37
12	38284550	38284700	1	chr12_38284550	Dgkb	0	38284350	38284575	38284437	23	172	23.3
12	39240050	39240600	1	chr12_39240050	Etv1	0	39240250	39240350	39240287	16	61	3.1
12	39604675	39605550	1	chr12_39604675	Etv1	0	39605175	39605550	39605187	15	194	37.6
12	39604675	39605800	1	chr12_39604675	Etv1	0	39605175	39605550	39605187	15	194	37.6
12	40505350	40510700	1	chr12_40505350	Arl4a	0	40508100	40508875	40508212	54	1187	91.8
12	41504150	41507750	1	chr12_41504150	Immp2l	0	41505975	41506375	41506162	105	981	49.9
12	53301400	53306375	1	chr12_53301400	Arhgap5	0	53304675	53304725	53304687	14	28	2.8
12	54396425	54397425	1	chr12_54396425	Akap6	0	54396150	54396525	54396337	67	643	38.3
12	55023625	55024650	1	chr12_55023625	Egln3	0	55024200	55024525	55024337	62	523	45
12	55031250	55034400	1	chr12_55031250	Npas3	0	55032550	55032950	55032762	75	720	50.1
12	55046575	55049800	1	chr12_55046575	Egln3	0	55047950	55048175	55048062	48	346	40.1
12	55080525	55082350	1	chr12_55080525	Egln3	0	55082150	55082225	55082162	16	47	5.7
12	55095625	55102575	1	chr12_55095625	Npas3	0	55101275	55101300	55101287	15	15	2.9
12	56301025	56308750	1	chr12_56301025	Psma6	0	56304250	56304375	56304287	24	110	15.9
12	56412825	56417575	1	chr12_56412825	Nfkbia	0	56414600	56414725	56414637	26	120	14.9
12	56421400	56423700	1	chr12_56421400	Nfkbia	0	56423500	56424000	56423687	74	854	80.4
12	59899225	59900225	1	chr12_59899225	Sip1	0	59899475	59899525	59899487	15	30	5.4
12	60425550	60426550	1	chr12_60425550	Fbxo33	0	60425425	60425775	60425562	42	428	31.4
12	66026625	66033375	1	chr12_66026625	C79407	0	66029725	66029750	66029737	13	13	1.4
12	66346775	66347575	1	chr12_66346775	Wdr20	0	66346675	66346925	66346837	32	235	26.7
12	70855725	70857300	1	chr12_70855725	EG622339	0	70856425	70856675	70856537	34	274	38.1
12	71692800	71696000	1	chr12_71692800	Frmd6	0	71693500	71693750	71693587	33	281	32.4
12	72376800	72380700	1	chr12_72376800	Dact1	0	72379275	72379475	72379462	26	151	30
12	73651750	73655250	1	chr12_73651750	Ppm1a	0	73652950	73653225	73653087	44	354	26.8
12	73662475	73665125	1	chr12_73662475	Ppm1a	0	73664325	73664575	73664437	57	439	50
12	74001775	74008875	1	chr12_74001775	Six4	0	74004650	74005050	74004887	111	1083	88.7
12	77813050	77826600	1	chr12_77813050	Max	0	77820350	77820750	77820512	50	587	74
12	77883350	77886275	1	chr12_77883350	Max	0	77883950	77884225	77884112	63	515	63.4
12	79914150	79917675	1	chr12_79914150	Pigh	0	79915600	79915900	79915712	47	396	35.8
12	79951025	79961725	1	chr12_79951025	6330442E10Rik	0	79954250	79954550	79954362	41	350	36.6
12	80725500	80728475	1	chr12_80725500	Zfp36l1	0	80726925	80727000	80726962	22	63	12.1
12	80769325	80771775	1	chr12_80769325	Rad51l1	0	80770775	80770950	80770862	37	229	37.7
12	81044700	81047200	1	chr12_81044700	Zfp36l1	0	81046150	81046200	81046162	13	26	4.9
12	81761225	81763850	1	chr12_81761225	Gm1568	0	81763150	81763300	81763162	21	115	20.8
12	82734825	82736325	1	chr12_82734825	Map3k9	0	82735650	82735775	82735712	26	120	21.9
12	84129300	84130300	1	chr12_84129300	Rgs6	0	84130100	84130250	84130162	20	104	16.6
12	84226800	84229225	1	chr12_84226800	Rgs6	0	84227525	84227750	84227637	23	171	24.4
12	85099325	85101575	1	chr12_85099325	Pnma1	0	85100825	85101225	85101037	45	512	53.8
12	86412275	86415225	1	chr12_86412275	Fos	0	86413675	86413725	86413687	14	28	5.2
12	86502050	86513925	1	chr12_86502050	Batf	0	86510250	86510550	86510362	68	582	48.5
12	87051775	87054350	1	chr12_87051775	1700019E19Rik	0	87052650	87052725	87052662	15	42	8.1
12	87077550	87079050	1	chr12_87077550	1700019E19Rik	0	87077725	87077900	87077737	18	116	18
12	87659150	87662525	1	chr12_87659150	Angel1	0	87660000	87660325	87660162	75	677	66.9
12	87703350	87707975	1	chr12_87703350	6430527G18Rik	0	87705850	87706050	87705912	31	203	29.5
12	87792075	87799275	1	chr12_87792075	6430527G18Rik	0	87793000	87793150	87793037	30	155	27.7
12	87819250	87824300	1	chr12_87819250	2310044G17Rik	0	87821725	87822000	87821862	64	507	63.3
12	88201300	88204650	1	chr12_88201300	Ahsa1	0	88202275	88202550	88202387	30	256	26.4
12	88205450	88207375	1	chr12_88205450	Ahsa1	0	88206950	88207475	88207212	114	1356	43.7
12	88215250	88221700	1	chr12_88215250	Ahsa1	0	88217350	88217400	88217362	14	28	5.2
12	99739475	99751950	1	chr12_99739475	Ttc8	0	99744575	99744675	99744637	20	72	12
12	99759450	99765875	1	chr12_99759450	2610021K21Rik	0	99762250	99762600	99762387	29	310	44.1
12	99811925	99816250	1	chr12_99811925	2610021K21Rik	0	99813525	99813825	99813662	91	823	72.1
12	100165150	100169025	1	chr12_100165150	Tdp1	0	100167125	100167300	100167212	28	169	20.7
12	100737475	100740350	1	chr12_100737475	Calm1	0	100738725	100739000	100738862	45	379	32.1
12	101396375	101400075	1	chr12_101396375	mmu-mir-1190	0	101397375	101397675	101397462	43	385	45.9
12	103039325	103043200	1	chr12_103039325	Chga	0	103041950	103041975	103041962	15	15	2.8
12	103111450	103119175	1	chr12_103111450	Itpk1	0	103115300	103115575	103115412	31	261	40.4
12	104834400	104835700	1	chr12_104834400	Serpina3n	0	104834275	104834650	104834462	80	736	58.2
12	105296675	105306075	1	chr12_105296675	4831426I19Rik	0	105303650	105303750	105303687	20	70	11.2
12	105316250	105318500	1	chr12_105316250	4831426I19Rik	0	105316775	105316850	105316812	14	40	5.7
12	105659350	105660875	1	chr12_105659350	Tcl1	0	105660150	105660550	105660412	28	296	50.3
12	106068425	106069525	1	chr12_106068425	4933433P14Rik	0	106068600	106068750	106068687	19	100	11.7
12	106538050	106542275	1	chr12_106538050	Vrk1	0	106541150	106541250	106541162	19	74	14.1
12	106627925	106628950	1	chr12_106627925	Vrk1	0	106628300	106628350	106628337	16	30	5.2
12	106847375	106849425	1	chr12_106847375	Vrk1	0	106848050	106848400	106848212	99	876	37.8
12	109133700	109135700	1	chr12_109133700	Degs2	0	109134900	109134925	109134912	13	13	2.5
12	109405100	109409000	1	chr12_109405100	Wars	0	109407100	109407300	109407212	28	186	25.6
12	110986875	110990500	1	chr12_110986875	Dync1h1	0	110989350	110989425	110989387	17	50	8.1
12	111133600	111136800	1	chr12_111133600	Hsp90aa1	0	111135925	111135950	111135937	17	17	3.2
12	111306600	111310125	1	chr12_111306600	2810452K22Rik	0	111307100	111307125	111307112	14	14	2.7
12	111329400	111331525	1	chr12_111329400	2810452K22Rik	0	111330175	111330200	111330187	18	18	3.4
12	112140100	112142750	1	chr12_112140100	6720458F09Rik	0	112141675	112141775	112141687	14	55	10.3
12	112963800	112965850	1	chr12_112963800	AI839735	0	112964925	112965000	112964962	15	42	7.1
12	113267800	113272975	1	chr12_113267800	Cdca4	0	113268475	113268725	113268562	40	300	35.9
12	113558975	113565625	1	chr12_113558975	Tex22	0	113562950	113563100	113563062	21	112	19.8
12	117488850	117490750	1	chr12_117488850	73	0	117489525	117489825	117489662	42	409	39.1
12	117889075	117891225	1	chr12_117889075	Rapgef5	0	117889325	117889500	117889437	18	113	16.1
12	118120775	118128700	1	chr12_118120775	Cdca7l	0	118126125	118126350	118126237	33	255	42.3
15	6692800	6697225	1	chr15_6692800	Osmr	0	6693925	6694050	6694012	17	74	8.9
15	8104100	8105175	1	chr15_8104100	Nup155	0	8104650	8104700	8104687	15	29	5.7
15	8106775	8109975	1	chr15_8106775	Wdr70	0	8109175	8109325	8109287	17	89	14.7
15	8643550	8646600	1	chr15_8643550	Nipbl	0	8645175	8645475	8645337	66	571	53.1
15	8663675	8664400	1	chr15_8663675	Slc1a3	0	8664300	8664350	8664312	15	30	5
15	9394900	9399950	1	chr15_9394900	Il7r	0	9397450	9397925	9397637	92	1019	50.7
15	10664525	10670875	1	chr15_10664525	Rai14	0	10668350	10668575	10668412	33	258	40.9
15	10768175	10769800	1	chr15_10768175	Rai14	0	10768800	10769050	10768962	31	237	21.1
15	11575325	11576450	1	chr15_11575325	Tars	0	11575500	11575725	11575587	23	163	17.6
15	11976875	11978175	1	chr15_11976875	Sub1	0	11977175	11977525	11977362	65	611	45.9
15	12368450	12371100	1	chr15_12368450	Golph3	0	12369050	12369425	12369262	55	572	47.2
15	12905200	12908925	1	chr15_12905200	Rnasen	0	12907000	12907200	12907087	23	170	29.5
15	13039575	13041325	1	chr15_13039575	Rnasen	0	13039675	13040000	13039862	55	472	34.2
15	16859100	16860250	1	chr15_16859100	Cdh10	0	16859925	16860125	16860062	21	148	9.9
15	25275425	25278100	1	chr15_25275425	Basp1	0	25276800	25277150	25276962	75	737	50.7
15	25666750	25674025	1	chr15_25666750	1810015C04Rik	0	25669425	25669500	25669462	21	57	9.8
15	25683375	25687550	1	chr15_25683375	1810015C04Rik	0	25685050	25685350	25685087	35	288	55.4
15	31486150	31487475	1	chr15_31486150	2012-03-06	0	31486625	31486650	31486637	20	20	3.9
15	33953000	33954325	1	chr15_33953000	Mtdh	0	33953225	33953425	33953337	19	137	15.2
15	33960650	33961650	1	chr15_33960650	Mtdh	0	33960450	33960650	33960587	22	141	11.2
15	34009900	34014375	1	chr15_34009900	Mtdh	0	34011825	34012000	34011887	21	123	21.1
15	34121450	34121825	1	chr15_34121450	Laptm4b	0	34121525	34121575	34121537	14	28	4.6
15	34189100	34193975	1	chr15_34189100	Matn2	0	34190625	34190825	34190762	22	156	18.4
15	34311825	34313025	1	chr15_34311825	Rpl30	0	34312625	34312725	34312687	24	93	18
15	36186025	36188150	1	chr15_36186025	Spag1	0	36186600	36186850	36186712	32	246	21.2
15	36413175	36420350	1	chr15_36413175	Ankrd46	0	36413650	36413950	36413812	34	297	39.5
15	36753275	36755050	1	chr15_36753275	Ywhaz	0	36754425	36754500	36754437	14	40	5.6
15	36932100	36938550	1	chr15_36932100	Zfp706	0	36936025	36936375	36936187	58	565	59.2
15	36955275	36956900	1	chr15_36955275	Zfp706	0	36956125	36956175	36956137	13	26	4.7
15	37025725	37028200	1	chr15_37025725	Zfp706	0	37026575	37026875	37026687	31	292	25.8
15	37186275	37188350	1	chr15_37186275	Grhl2	0	37186275	37186300	37186287	13	13	2.4
15	37920075	37924400	1	chr15_37920075	Rrm2b	0	37921500	37921750	37921612	23	192	18.6
15	37998000	38007275	1	chr15_37998000	Rrm2b	0	38004375	38004700	38004562	47	439	41.3
15	38588025	38589625	1	chr15_38588025	Atp6v1c1	0	38589150	38589500	38589337	46	451	44.8
15	39606425	39615250	1	chr15_39606425	Tm7sf4	0	39610750	39610900	39610812	31	168	22.9
15	50647475	50648775	1	chr15_50647475	Eif3s3	0	50647525	50647800	50647662	44	342	24
15	50728500	50730650	1	chr15_50728500	Trps1	0	50730425	50731000	50730562	41	601	45.9
15	51831725	51832850	1	chr15_51831725	Rad21	0	51832575	51832750	51832637	19	119	10.2
15	51843100	51844700	1	chr15_51843100	Rad21	0	51843175	51843375	51843312	19	136	13.3
15	52796225	52798225	1	chr15_52796225	Thrap6	0	52797925	52798325	52798112	57	640	67.5
15	53003550	53008925	1	chr15_53003550	Samd12	0	53007075	53007225	53007162	31	167	26
15	56572025	56572850	1	chr15_56572025	Has2	0	56572800	56573200	56573037	66	693	54.2
15	57338975	57339975	1	chr15_57338975	BC026439	0	57339625	57339850	57339712	22	164	12.8
15	57585850	57587175	1	chr15_57585850	Derl1	0	57586475	57586800	57586612	32	265	34.6
15	58896725	58902025	1	chr15_58896725	Mtss1	0	58900350	58900375	58900362	13	13	1.7
15	59123375	59124400	1	chr15_59123375	Sqle	0	59124200	59124550	59124412	45	412	16.3
15	59163125	59164925	1	chr15_59163125	Sqle	0	59163325	59163425	59163387	17	62	9.8
15	59220150	59223925	1	chr15_59220150	E430025E21Rik	0	59221675	59221825	59221787	26	142	25.6
15	59651900	59656075	1	chr15_59651900	Trib1	0	59653625	59653925	59653762	17	171	28.3
15	61838550	61842800	1	chr15_61838550	Myc	0	61842325	61842525	61842462	20	140	14.5
15	61908075	61910925	1	chr15_61908075	Myc	0	61908825	61909000	61908887	26	141	24
15	61911600	61930250	1	chr15_61911600	Myc	0	61922550	61922750	61922662	29	207	33.4
15	62787325	62789975	1	chr15_62787325	Mlze	0	62788450	62789000	62788812	75	847	48.3
15	66899650	66901825	1	chr15_66899650	St3gal1	0	66900625	66901050	66900812	66	702	46.8
15	72303400	72304600	1	chr15_72303400	Kcnk9	0	72304025	72304300	72304212	34	302	31.1
15	73450175	73461900	1	chr15_73450175	Dennd3	0	73458125	73458250	73458137	16	80	13.5
15	73499675	73510225	1	chr15_73499675	Gpr20	0	73503625	73503950	73503812	78	687	56.1
15	73602400	73604675	1	chr15_73602400	Gm628	0	73603225	73603550	73603387	34	342	49.2
15	73825100	73827700	1	chr15_73825100	Gm628	0	73825825	73826075	73825962	30	227	23.7
15	74049725	74054900	1	chr15_74049725	Bai1	0	74053350	74053600	74053512	24	203	33.9
15	74213300	74216925	1	chr15_74213300	Bai1	0	74214825	74215050	74214887	28	215	27.4
15	74478475	74481275	1	chr15_74478475	228	0	74480025	74480300	74480137	47	383	48.7
15	74491225	74496025	1	chr15_74491225	Arc	0	74493025	74493125	74493037	14	54	7.4
15	74517850	74518975	1	chr15_74517850	Jrk	0	74518650	74518975	74518787	34	319	26.5
15	75460375	75462250	1	chr15_75460375	Zfp41	0	75461075	75461300	75461237	21	161	19.4
15	75577900	75580575	1	chr15_75577900	Zc3h3	0	75578600	75578750	75578687	25	132	16.6
15	75814050	75818100	1	chr15_75814050	Mapk15	0	75817350	75817450	75817387	25	94	15.5
15	75984850	75986000	1	chr15_75984850	Plec1	0	75985750	75985825	75985787	20	56	9.9
15	76928200	76932400	1	chr15_76928200	Mb	0	76929900	76930275	76930087	31	337	39.1
15	77672150	77679700	1	chr15_77672150	Myh9	0	77675075	77675325	77675162	30	233	28.9
15	77828050	77830125	1	chr15_77828050	Eif3s7	0	77828800	77829000	77828837	32	207	32.8
15	78374450	78376475	1	chr15_78374450	Sstr3	0	78375175	78375350	78375262	16	106	15.2
15	78604700	78607125	1	chr15_78604700	Mfng	0	78605825	78605925	78605912	22	77	12.8
15	78690750	78692325	1	chr15_78690750	Lgals2	0	78691625	78691725	78691637	16	61	9.4
15	78864775	78867225	1	chr15_78864775	Galr3	0	78866325	78866400	78866387	18	52	9.6
15	79291025	79294475	1	chr15_79291025	Kcnj4	0	79291900	79291925	79291912	16	16	3.1
15	79455475	79458350	1	chr15_79455475	Dmc1	0	79457950	79457975	79457962	13	13	2.1
15	79678850	79682175	1	chr15_79678850	Cbx6	0	79681825	79681925	79681837	16	63	10.2
15	81197475	81198400	1	chr15_81197475	Slc25a17	0	81197600	81197750	81197687	17	89	11.3
15	81793450	81796900	1	chr15_81793450	Pmm1	0	81796800	81797000	81796962	19	132	7.8
15	82045550	82049150	1	chr15_82045550	Cenpm	0	82046975	82047275	82047137	59	512	30.7
15	83007175	83012250	1	chr15_83007175	Cyb5r3	0	83009350	83009475	83009387	19	91	16.5
15	83577275	83577575	1	chr15_83577275	Scube1	0	83577400	83577425	83577412	14	14	2.7
15	83806850	83806950	1	chr15_83806850	4931407K02Rik	0	83806625	83806975	83806787	31	327	38.4
15	84062400	84064050	1	chr15_84062400	Parvb	0	84063475	84063575	84063487	14	55	5.9
15	85037625	85040225	1	chr15_85037625	Smc1l2	0	85038500	85038700	85038587	24	165	23.9
15	85940275	85941175	1	chr15_85940275	Cerk	0	85940650	85940675	85940662	13	13	2.1
15	88733975	88735075	1	chr15_88733975	Pim3	0	88734275	88734300	88734287	14	14	2.7
15	92832875	92835400	1	chr15_92832875	Glt8d3	0	92834125	92834250	92834137	19	93	16.1
15	96005000	96009600	1	chr15_96005000	Arid2	0	96007425	96007775	96007612	47	485	51
15	96549825	96550625	1	chr15_96549825	Slc38a2	0	96550325	96550575	96550437	35	271	38.5
15	97195825	97200275	1	chr15_97195825	Amigo2	0	97197100	97197300	97197187	19	136	22.8
15	97415025	97426750	1	chr15_97415025	D15Ertd682e	0	97422375	97422575	97422537	34	246	36.3
15	98941150	98943475	1	chr15_98941150	Spats2	0	98943000	98943025	98943012	20	20	3.9
15	99033775	99034125	1	chr15_99033775	Kcnh3	0	99034125	99034225	99034162	20	78	14.4
15	99316600	99317625	1	chr15_99316600	Bcdin3d	0	99317275	99317425	99317337	20	108	14.5
15	99666875	99668800	1	chr15_99666875	Lima1	0	99667675	99667700	99667687	16	16	3.1
15	99885975	99889800	1	chr15_99885975	D330037H05Rik	0	99888175	99888200	99888187	13	13	1.3
15	100089000	100092275	1	chr15_100089000	4930478A21Rik	0	100091900	100091975	100091912	16	44	7.1
15	100096750	100098900	1	chr15_100096750	4930478A21Rik	0	100097875	100097975	100097912	15	58	8.1
15	100301325	100304100	1	chr15_100301325	BC035295	0	100302075	100302400	100302212	33	310	43.7
15	100735600	100739475	1	chr15_100735600	Slc4a8	0	100737200	100737250	100737237	14	27	5.2
15	101008675	101010000	1	chr15_101008675	Acvr1b	0	101009225	101009425	101009287	24	165	20.7
14	6698275	6699600	1	chr14_6698275	Dnase1l3	0	6699125	6699225	6699212	18	64	8
14	6741900	6751050	1	chr14_6741900	Dnase1l3	0	6745850	6746050	6745962	19	133	23.2
14	6841000	6848850	1	chr14_6841000	Rpp14	0	6846600	6846875	6846762	49	395	26
14	6930225	6932500	1	chr14_6930225	Pdhb	0	6932025	6932200	6932087	26	155	22.6
14	7196175	7199225	1	chr14_7196175	Oit1	0	7197125	7197325	7197287	28	171	27.1
14	10354000	10358900	1	chr14_10354000	Fhit	0	10354025	10354200	10354137	31	199	26.3
14	10455225	10462025	1	chr14_10455225	Fhit	0	10456950	10457225	10457037	25	219	20.7
14	10900825	10909850	1	chr14_10900825	3830406C13Rik	0	10900725	10901050	10900912	46	383	27.7
14	17260450	17261400	1	chr14_17260450	Ube2e1	0	17261000	17261025	17261012	13	13	2.5
14	18651850	18653375	1	chr14_18651850	Gng2	0	18652000	18652200	18652112	23	156	17.2
14	18918125	18918975	1	chr14_18918125	Kcnk5	0	18918200	18918425	18918262	33	236	32.8
14	19004175	19008550	1	chr14_19004175	Kcnk5	0	19007950	19008450	19008212	228	2260	65.9
14	19009500	19012925	1	chr14_19009500	Kcnk5	0	19011825	19011975	19011862	29	168	32.4
14	20321050	20331700	1	chr14_20321050	Adk	0	20328975	20329000	20328987	14	14	2.2
14	22965950	22970825	1	chr14_22965950	E330034G19Rik	0	22967175	22967300	22967287	14	63	12.1
14	22971625	22978950	1	chr14_22971625	E330034G19Rik	0	22977400	22977650	22977462	17	147	22.5
14	22979500	22983450	1	chr14_22979500	E330034G19Rik	0	22981325	22981500	22981437	18	112	15.6
14	23084125	23087825	1	chr14_23084125	E330034G19Rik	0	23086375	23086600	23086412	28	216	30.9
14	23412000	23412675	1	chr14_23412000	Rps24	0	23411975	23412175	23412037	22	139	24.7
14	24151150	24151650	1	chr14_24151150	Rai17	0	24151200	24151575	24151387	59	583	45
14	24418325	24426725	1	chr14_24418325	Ppif	0	24424175	24424475	24424312	79	681	49.4
14	24656725	24659475	1	chr14_24656725	Anxa11	0	24658475	24658500	24658487	13	13	2.4
14	24696525	24703450	1	chr14_24696525	Plac9	0	24697625	24697650	24697637	15	15	2.7
14	25706975	25707975	1	chr14_25706975	Asb14	0	25706875	25707200	25707037	35	297	25.7
14	25918500	25923975	1	chr14_25918500	Hesx1	0	25921225	25921350	25921262	15	73	11.7
14	26097925	26100575	1	chr14_26097925	D14Abb1e	0	26099650	26100325	26099762	50	739	104.2
14	26168125	26179000	1	chr14_26168125	D14Abb1e	0	26175725	26175825	26175787	19	67	10.1
14	26495200	26503750	1	chr14_26495200	Ccdc66	0	26501025	26501300	26501162	42	333	21.9
14	28779075	28781350	1	chr14_28779075	Selk	0	28779950	28780250	28780087	36	312	31.7
14	29413475	29414300	1	chr14_29413475	Prkcd	0	29413700	29413850	29413712	22	115	16.6
14	29966650	29968525	1	chr14_29966650	Nt5dc2	0	29967675	29967900	29967762	30	225	24.7
14	30727700	30733100	1	chr14_30727700	Ankrd28	0	30729025	30729225	30729112	22	147	20.5
14	30746750	30748500	1	chr14_30746750	Ankrd28	0	30747450	30747675	30747487	25	197	22.6
14	30951900	30955775	1	chr14_30951900	Msmb	0	30953400	30953575	30953462	23	138	18.2
14	32159350	32161725	1	chr14_32159350	Arhgap22	0	32160200	32160250	32160212	15	30	3.9
14	33087475	33089525	1	chr14_33087475	Syt15	0	33087700	33087900	33087812	23	156	14.4
14	33282325	33284500	1	chr14_33282325	Mmrn2	0	33282950	33283175	33283037	42	294	31.4
14	33443700	33445400	1	chr14_33443700	Opn4	0	33443825	33443850	33443837	14	14	2.5
14	44384050	44390175	1	chr14_44384050	Gnpnat1	0	44385975	44386175	44386112	22	138	18.7
14	46493800	46496325	1	chr14_46493800	D14Ertd436e	0	46494600	46494925	46494787	30	312	27.8
14	47619200	47625625	1	chr14_47619200	Otx2	0	47622900	47623300	47623062	58	722	74.6
14	47672775	47676700	1	chr14_47672775	Otx2	0	47676050	47676625	47676212	71	908	72.1
14	47919925	47920950	1	chr14_47919925	4932432K03Rik	0	47920750	47921075	47920937	64	593	64.9
14	48050950	48051350	1	chr14_48050950	Nat12	0	48050900	48051175	48050987	39	333	27.2
14	49900475	49902950	1	chr14_49900475	Pnp	0	49901800	49901975	49901837	24	160	31.4
14	50987300	50991200	1	chr14_50987300	Hnrpc	0	50988225	50988450	50988362	27	208	27.7
14	51204900	51207450	1	chr14_51204900	Rab2b	0	51206375	51206625	51206412	32	242	25.1
14	52535325	52536250	1	chr14_52535325	Dad1	0	52535025	52535375	52535212	24	218	10.2
14	53334525	53340100	1	chr14_53334525	Oxa1l	0	53338600	53338950	53338787	39	410	48.9
14	53883850	53885325	1	chr14_53883850	Il25	0	53884825	53884900	53884837	20	56	8.8
14	54001450	54004475	1	chr14_54001450	Zfhx2	0	54002225	54002500	54002387	47	386	37.8
14	54311025	54313400	1	chr14_54311025	Dhrs2	0	54312500	54312825	54312637	36	358	51.3
14	54505500	54506650	1	chr14_54505500	Pck2	0	54505500	54505750	54505587	32	257	30.6
14	56491275	56491900	1	chr14_56491275	Il17d	0	56491450	56491650	56491462	22	159	30
14	56802850	56807525	1	chr14_56802850	Mrp63	0	56807200	56807300	56807212	22	84	14.7
14	56861850	56864475	1	chr14_56861850	Efha1	0	56862600	56862850	56862712	47	359	41.2
14	57610600	57612450	1	chr14_57610600	EG380907	0	57610650	57610950	57610787	19	188	26.8
14	58324075	58326025	1	chr14_58324075	D14Ertd668e	0	58324625	58324825	58324662	22	158	20.8
14	58759275	58762750	1	chr14_58759275	Tmem46	0	58760825	58761000	58760937	17	109	12.4
14	59595825	59598650	1	chr14_59595825	C1qtnf9	0	59597275	59597600	59597412	30	305	37.3
14	59934875	59940050	1	chr14_59934875	Mipep	0	59936300	59936650	59936487	54	500	36.7
14	61303600	61305150	1	chr14_61303600	Gucy1b2	0	61304425	61304575	61304537	18	97	11.9
14	62411975	62416050	1	chr14_62411975	Tdh	0	62412375	62412700	62412537	51	460	40.2
14	63360825	63364800	1	chr14_63360825	259	0	63362300	63362725	63362512	59	662	56.8
14	63584750	63588225	1	chr14_63584750	Kif13b	0	63586875	63587075	63587012	27	174	23.6
14	63591225	63599450	1	chr14_63591225	Kif13b	0	63596550	63596575	63596562	18	18	3.4
14	64127400	64129150	1	chr14_64127400	Fzd3	0	64127575	64127700	64127587	14	67	13
14	64778575	64780575	1	chr14_64778575	Pbk	0	64779225	64779525	64779312	54	475	45.2
14	65716125	65717100	1	chr14_65716125	Dpysl2	0	65716875	65717150	65717012	37	295	11.5
14	66712450	66714450	1	chr14_66712450	Gnrh1	0	66713950	66714450	66714137	56	737	73.6
14	66846100	66848275	1	chr14_66846100	Gnrh1	0	66847275	66847550	66847387	36	303	32.7
14	66890100	66891500	1	chr14_66890100	Dock5	0	66889900	66890125	66890012	26	189	17.7
14	71241650	71242750	1	chr14_71241650	Fndc3a	0	71241900	71242050	71241962	20	107	19
14	71964975	71967200	1	chr14_71964975	P2ry5	0	71965875	71965975	71965937	27	97	17.6
14	71986475	71989700	1	chr14_71986475	P2ry5	0	71987550	71987900	71987712	33	333	41.1
14	73667475	73670050	1	chr14_73667475	5031414D18Rik	0	73668575	73668800	73668637	21	150	26.4
14	74977800	74979750	1	chr14_74977800	Nufip1	0	74978650	74978800	74978712	26	142	22.5
14	75121125	75122300	1	chr14_75121125	Tsc22d1	0	75122025	75122425	75122287	43	479	65.8
14	75194050	75197725	1	chr14_75194050	Tsc22d1	0	75195625	75195850	75195712	24	171	20.2
14	75349175	75351075	1	chr14_75349175	Tsc22d1	0	75350075	75350225	75350087	17	95	15.4
14	75354550	75361250	1	chr14_75354550	Tsc22d1	0	75358975	75359350	75359187	42	453	63.1
14	75361550	75368275	1	chr14_75361550	Tsc22d1	0	75364250	75364400	75364287	23	125	23.7
14	76251700	76253725	1	chr14_76251700	LOC629678	0	76253425	76254325	76253712	50	1012	78.6
14	77417450	77420200	1	chr14_77417450	Tnfsf11	0	77418150	77418275	77418187	18	81	13.5
14	77504825	77505425	1	chr14_77504825	Dgkh	0	77504550	77504875	77504712	56	494	42.5
14	77873600	77878875	1	chr14_77873600	AU017455	0	77874675	77874900	77874787	21	165	25.1
14	78007525	78014575	1	chr14_78007525	1190002H23Rik	0	78012200	78012475	78012362	41	333	28.2
14	78316275	78319325	1	chr14_78316275	Sugt1	0	78317750	78318025	78317837	39	339	29.7
14	85226750	85227750	1	chr14_85226750	Diap3	0	85227550	85227800	85227637	28	220	20.2
14	90538700	90539700	1	chr14_90538700	Pcdh9	0	90539300	90539450	90539437	15	84	7.4
14	97919875	97922900	1	chr14_97919875	6720463M24Rik	0	97922425	97922725	97922537	45	397	35.3
14	98205400	98210350	1	chr14_98205400	Klf5	0	98207800	98208050	98207912	48	359	36.6
14	98218575	98226750	1	chr14_98218575	Klf5	0	98222700	98223625	98222887	61	1213	120.4
14	98229675	98236800	1	chr14_98229675	Klf5	0	98236325	98236575	98236462	40	312	22.1
14	98237125	98239800	1	chr14_98237125	Klf5	0	98238650	98238825	98238687	29	174	28.2
14	98392875	98394600	1	chr14_98392875	Klf5	0	98393325	98393650	98393462	63	585	56.1
14	100662075	100665800	1	chr14_100662075	Uchl3	0	100663425	100663700	100663512	23	217	31.4
14	104386975	104388950	1	chr14_104386975	Ndfip2	0	104388025	104388250	104388062	24	174	24.2
14	104735750	104737850	1	chr14_104735750	Spry2	0	104736875	104737300	104737137	101	1072	102.4
14	104743375	104746950	1	chr14_104743375	Spry2	0	104746625	104746975	104746812	48	474	39.5
14	104805225	104806950	1	chr14_104805225	Spry2	0	104806300	104807200	104806587	103	1353	112.6
14	104807550	104809575	1	chr14_104807550	Spry2	0	104808250	104808325	104808262	20	60	10.9
14	117249825	117255175	1	chr14_117249825	Abcc4	0	117252700	117253025	117252887	33	326	41.8
14	117633175	117636675	1	chr14_117633175	Abcc4	0	117634850	117635175	117635037	68	602	54.3
14	120778200	120778600	1	chr14_120778200	Slc15a1	0	120778350	120778525	120778387	16	103	15.8
14	120809575	120812575	1	chr14_120809575	Slc15a1	0	120811175	120811400	120811287	38	276	41.3
14	120865950	120868000	1	chr14_120865950	Dock9	0	120867675	120867875	120867762	23	147	12
14	121390650	121394525	1	chr14_121390650	Tm9sf2	0	121393525	121393775	121393587	38	312	39.9
14	121464425	121469100	1	chr14_121464425	EG328479	0	121465450	121465475	121465462	22	22	3.9
14	121474925	121478700	1	chr14_121474925	EG328479	0	121477250	121477600	121477412	84	733	49.9
14	121549775	121559450	1	chr14_121549775	EG328479	0	121551425	121551900	121551687	174	1921	107.5
14	121603175	121605275	1	chr14_121603175	Zic5	0	121603900	121604100	121603912	17	125	19.7
17	3417350	3418125	1	chr17_3417350	Tiam2	0	3417025	3417500	3417187	56	665	49.9
17	3472100	3473225	1	chr17_3472100	Tfb1m	0	3472875	3473200	3473037	53	479	35.2
17	3835275	3835975	1	chr17_3835275	Nox3	0	3835725	3835950	3835812	30	217	15.4
17	5007300	5011325	1	chr17_5007300	5730437N04Rik	0	5008700	5008925	5008787	30	219	22.2
17	5225600	5229175	1	chr17_5225600	5730437N04Rik	0	5227350	5227550	5227487	21	158	22.8
17	6605775	6620275	1	chr17_6605775	Sytl3	0	6613275	6613375	6613362	25	82	16.3
17	7053025	7060500	1	chr17_7053025	Tcp10b	0	7056425	7056725	7056587	39	338	38.3
17	7087500	7092800	1	chr17_7087500	Tcp10b	0	7090250	7090525	7090362	18	171	25
17	7367600	7367675	1	chr17_7367600	Ttll2	0	7367275	7367700	7367462	36	441	36.2
17	7369175	7373725	1	chr17_7369175	Ttll2	0	7372675	7372875	7372787	20	128	18.6
17	8251650	8254125	1	chr17_8251650	T	0	8252550	8252850	8252687	35	280	18.6
17	9422275	9423750	1	chr17_9422275	1700010I14Rik	0	9423275	9423675	9423537	47	535	39.7
17	9922225	9925475	1	chr17_9922225	Qk	0	9923175	9923425	9923287	32	249	22.5
17	10198100	10200975	1	chr17_10198100	Qk	0	10199725	10199950	10199837	31	230	33.7
17	10207750	10219275	1	chr17_10207750	Pacrg	0	10217750	10218025	10217862	31	251	30.9
17	10220575	10224575	1	chr17_10220575	Pacrg	0	10220750	10221025	10220862	38	314	15.4
17	10272575	10278725	1	chr17_10272575	Qk	0	10276225	10276400	10276287	22	133	23.2
17	10281950	10286475	1	chr17_10281950	Qk	0	10284850	10285150	10285012	36	338	27.4
17	10935800	10936975	1	chr17_10935800	Park2	0	10936375	10936550	10936437	14	92	16.9
17	11998975	12005250	1	chr17_11998975	Map3k4	0	12000100	12000300	12000162	21	147	26.1
17	12024875	12027450	1	chr17_12024875	Map3k4	0	12026625	12026700	12026637	14	41	8
17	12037250	12051950	1	chr17_12037250	Map3k4	0	12038500	12038650	12038562	18	96	16.1
17	12840350	12842925	1	chr17_12840350	Wtap	0	12842700	12842875	12842762	23	127	20.1
17	14551575	14555875	1	chr17_14551575	Thbs2	0	14554675	14554875	14554737	18	126	20.5
17	14894050	14895800	1	chr17_14894050	9030025P20Rik	0	14895125	14895325	14895187	18	125	14.5
17	14951725	14954125	1	chr17_14951725	Dll1	0	14952700	14953000	14952837	55	469	42
17	15694125	15696625	1	chr17_15694125	Rgmb	0	15694925	15695225	15695037	18	171	31.6
17	17443450	17444450	1	chr17_17443450	EG626942	0	17444125	17444150	17444137	14	14	1.5
17	24537950	24539400	1	chr17_24537950	Fahd1	0	24538875	24539250	24539037	37	408	49.2
17	25407425	25409175	1	chr17_25407425	2400010G15Rik	0	25407525	25407750	25407637	56	397	39.8
17	25481550	25486250	1	chr17_25481550	BC052484	0	25482850	25482925	25482912	18	50	8.5
17	25734175	25738025	1	chr17_25734175	Solh	0	25737050	25737250	25737212	29	152	24.4
17	26274825	26280225	1	chr17_26274825	1200007D18Rik	0	26275325	26275675	26275487	43	413	44
17	26317675	26333950	1	chr17_26317675	Atp6v0e	0	26323825	26324000	26323962	27	171	26.1
17	26562275	26564600	1	chr17_26562275	Nkx2-5	0	26563700	26563825	26563712	15	67	11.2
17	26727800	26729275	1	chr17_26727800	Bak1	0	26728775	26728825	26728812	19	37	7
17	26736150	26737925	1	chr17_26736150	Bak1	0	26737050	26737075	26737062	16	16	3.1
17	26966075	26969875	1	chr17_26966075	Lemd2	0	26968425	26968800	26968637	56	571	57.7
17	27328300	27334275	1	chr17_27328300	Rps10	0	27330425	27330775	27330612	56	513	40.9
17	27522750	27529225	1	chr17_27522750	Snrp1c	0	27527750	27527775	27527762	22	22	4.3
17	27662750	27670800	1	chr17_27662750	Taf11	0	27668100	27668125	27668112	15	15	2.8
17	27720850	27723250	1	chr17_27720850	Tcp11	0	27721950	27722300	27722137	44	408	49.6
17	28144775	28149975	1	chr17_28144775	Tulp1	0	28146100	28146250	28146137	14	81	3.6
17	28315550	28323925	1	chr17_28315550	Tmhs	0	28321425	28321725	28321562	34	304	52.1
17	28507750	28511925	1	chr17_28507750	Mapk13	0	28510400	28510550	28510487	18	93	10.2
17	28653600	28660050	1	chr17_28653600	Pxt1	0	28654875	28655075	28654962	34	246	34.1
17	28706350	28715700	1	chr17_28706350	Kctd20	0	28712200	28712400	28712362	27	175	26.3
17	28739600	28741025	1	chr17_28739600	Stk38	0	28740250	28740350	28740262	13	52	7
17	28891600	28894750	1	chr17_28891600	9830134C10Rik	0	28892825	28893000	28892887	30	174	31.3
17	28911325	28917200	1	chr17_28911325	9830134C10Rik	0	28914475	28914850	28914637	104	920	57.7
17	29193800	29197125	1	chr17_29193800	Pim1	0	29194500	29194775	29194612	50	396	26.1
17	29578875	29583625	1	chr17_29578875	Zfand3	0	29581975	29582050	29581987	17	51	9.4
17	29606575	29607625	1	chr17_29606575	Zfand3	0	29607250	29607650	29607387	31	359	38.5
17	30324350	30326400	1	chr17_30324350	Glo1	0	30325350	30325575	30325437	26	180	22.6
17	30760250	30761925	1	chr17_30760250	Umodl1	0	30760225	30760350	30760337	19	83	13.5
17	30839350	30845800	1	chr17_30839350	Tff3	0	30840525	30840850	30840687	63	600	56.7
17	30986475	30998025	1	chr17_30986475	Ubash3a	0	30993000	30993225	30993137	37	297	39.1
17	31031225	31040325	1	chr17_31031225	Slc37a1	0	31036675	31036700	31036687	15	15	2.9
17	31137950	31139900	1	chr17_31137950	Slc37a1	0	31139000	31139025	31139012	13	13	2.2
17	31150675	31155425	1	chr17_31150675	Wdr4	0	31154600	31154650	31154637	15	29	5.3
17	31313950	31320400	1	chr17_31313950	Cbs	0	31317725	31317750	31317737	14	14	2.2
17	31627025	31628025	1	chr17_31627025	Snf1lk	0	31627775	31628000	31627887	29	209	23.7
17	31657825	31663425	1	chr17_31657825	Snf1lk	0	31662750	31662875	31662762	16	73	11.2
17	31785700	31788375	1	chr17_31785700	Notch3	0	31788300	31788400	31788337	18	66	10.8
17	32026525	32028900	1	chr17_32026525	Akap8	0	32027350	32027775	32027587	79	849	62
17	32876175	32877150	1	chr17_32876175	D10628	0	32876200	32876400	32876287	20	144	24.2
17	33204350	33209500	1	chr17_33204350	Zfp414	0	33206575	33206900	33206737	49	445	33.4
17	33504850	33508625	1	chr17_33504850	Daxx	0	33507250	33507300	33507262	13	26	4.2
17	34570625	34574225	1	chr17_34570625	Hspa1a	0	34570700	34570750	34570712	13	26	3.8
17	35093325	35095500	1	chr17_35093325	H2-Q10	0	35093775	35093825	35093812	16	31	5
17	35095750	35099725	1	chr17_35095750	H2-Q10	0	35098525	35098725	35098637	52	342	44.8
17	35150675	35153000	1	chr17_35150675	Cdsn	0	35151500	35151700	35151587	31	207	26.3
17	35154125	35160300	1	chr17_35154125	Psors1c2	0	35156700	35157000	35156837	40	331	38.4
17	35546950	35548475	1	chr17_35546950	mmu-mir-877	0	35547250	35547475	35547337	37	265	31.3
17	36447750	36454150	1	chr17_36447750	Trim15	0	36452700	36452850	36452762	25	140	23.6
17	36601700	36608100	1	chr17_36601700	Zfp57	0	36605525	36605825	36605637	59	494	46.8
17	36674700	36686925	1	chr17_36674700	Olfr90	0	36680800	36680825	36680812	13	13	2.2
17	36687075	36691350	1	chr17_36687075	Olfr90	0	36686975	36687400	36687162	199	1932	61.2
17	39958250	39959100	1	chr17_39958250	Crisp1	0	39959075	39959250	39959112	18	124	2.7
17	40367875	40368925	1	chr17_40367875	Cenpq	0	40367725	40367900	40367837	21	118	17
17	42364375	42364625	1	chr17_42364375	Cd2ap	0	42364500	42364650	42364587	16	83	11.7
17	43444275	43446350	1	chr17_43444275	Enpp5	0	43444975	43445000	43444987	14	14	1
17	43935725	43937700	1	chr17_43935725	Runx2	0	43935675	43936025	43935887	53	494	43.6
17	44957300	44960250	1	chr17_44957300	Aarsl	0	44959025	44959200	44959137	25	146	23.7
17	45069725	45077600	1	chr17_45069725	Slc29a1	0	45070500	45071125	45070862	93	1364	99
17	45285575	45288575	1	chr17_45285575	Mrpl14	0	45287250	45287275	45287262	14	14	2.1
17	45543475	45545825	1	chr17_45543475	Mrps18a	0	45543950	45544350	45544137	52	532	44.7
17	46255450	46257775	1	chr17_46255450	Rpl7l1	0	46256300	46256450	46256312	16	91	13.7
17	47028175	47031125	1	chr17_47028175	Ccnd3	0	47029375	47029525	47029462	27	150	25.1
17	47111125	47113350	1	chr17_47111125	Trfp	0	47112250	47112425	47112262	16	96	17.6
17	47348675	47354150	1	chr17_47348675	Mdfi	0	47351350	47351400	47351362	14	28	5
17	47359725	47363475	1	chr17_47359725	Mdfi	0	47361675	47361875	47361762	21	148	27.9
17	47413825	47422675	1	chr17_47413825	Foxp4	0	47416450	47416725	47416587	37	306	29.6
17	47451000	47454375	1	chr17_47451000	Foxp4	0	47453350	47453400	47453362	17	32	5.7
17	47888750	47903775	1	chr17_47888750	AI314976	0	47900275	47900325	47900287	14	27	4.9
17	47908425	47911950	1	chr17_47908425	Bzrpl1	0	47909475	47909525	47909487	13	26	4.3
17	47955025	47958400	1	chr17_47955025	Unc5cl	0	47956400	47956525	47956437	16	74	13.1
17	48081250	48083925	1	chr17_48081250	Unc5cl	0	48081800	48082175	48081987	156	1348	59.2
17	48493825	48500950	1	chr17_48493825	Mocs1	0	48499475	48499550	48499487	20	56	9.5
17	49891075	49894825	1	chr17_49891075	Plcl2	0	49893275	49893600	49893412	76	657	37.8
17	51160300	51162450	1	chr17_51160300	Satb1	0	51160250	51160475	51160362	23	173	27.2
17	52920925	52922000	1	chr17_52920925	Rab5a	0	52921200	52921325	52921237	16	73	9.9
17	53016500	53017575	1	chr17_53016500	4921523A10Rik	0	53016425	53016700	53016562	37	327	46.2
17	53025675	53027025	1	chr17_53025675	Pcaf	0	53026475	53026975	53026737	257	2637	82.4
17	56315650	56318700	1	chr17_56315650	Prss15	0	56316925	56317225	56317087	29	259	40.8
17	56552775	56563325	1	chr17_56552775	Mllt1	0	56554875	56554900	56554887	20	20	3.9
17	62860475	62863250	1	chr17_62860475	Efna5	0	62861900	62862225	62862062	92	804	56.4
17	63217350	63221725	1	chr17_63217350	Fert2	0	63220175	63220225	63220187	14	28	5.4
17	65623025	65626825	1	chr17_65623025	Txndc2	0	65625025	65625250	65625162	25	188	20.7
17	65815350	65816600	1	chr17_65815350	Twsg1	0	65815600	65815825	65815762	24	180	21.9
17	66188675	66192200	1	chr17_66188675	1110012J17Rik	0	66190300	66190375	66190362	21	61	10.3
17	66342125	66348325	1	chr17_66342125	Rab12	0	66344550	66344675	66344562	30	137	22.9
17	66360875	66364525	1	chr17_66360875	Rab12	0	66362275	66362500	66362387	35	271	28.9
17	66414225	66420650	1	chr17_66414225	1110012J17Rik	0	66415275	66415300	66415287	13	13	2.2
17	70676600	70678200	1	chr17_70676600	Tgif	0	70677400	70677825	70677612	85	877	59.2
17	70683575	70687150	1	chr17_70683575	Tgif	0	70685950	70686025	70686012	16	46	8.8
17	70803375	70808475	1	chr17_70803375	234	0	70805650	70805800	70805737	34	185	33.9
17	78539900	78542425	1	chr17_78539900	Vit	0	78540650	78541075	78540837	54	676	70.8
17	80349250	80351100	1	chr17_80349250	Cdkl4	0	80350300	80350425	80350312	14	68	12.7
17	80543125	80545275	1	chr17_80543125	Cdkl4	0	80544075	80544450	80544287	142	1280	53.9
17	80566650	80574200	1	chr17_80566650	Cdkl4	0	80568600	80568825	80568712	21	157	8.7
17	80693575	80695500	1	chr17_80693575	Map4k3	0	80693725	80693900	80693887	23	116	22.1
17	83373550	83379775	1	chr17_83373550	Cox7a2l	0	83377925	83378250	83378062	63	560	42.5
17	83384125	83387200	1	chr17_83384125	Cox7a2l	0	83385525	83385825	83385687	30	272	35.6
17	83648575	83653575	1	chr17_83648575	Haao	0	83651250	83651450	83651312	25	157	16.9
17	83657850	83663525	1	chr17_83657850	Haao	0	83661575	83661850	83661712	33	305	58
17	83911200	83915900	1	chr17_83911200	Mta3	0	83912250	83912400	83912312	30	166	26.4
17	83916350	83920200	1	chr17_83916350	Mta3	0	83920175	83920350	83920262	20	114	14.1
17	84085550	84086425	1	chr17_84085550	Zfp36l2	0	84085950	84086000	84085962	13	26	4
17	84258775	84263700	1	chr17_84258775	Plekhh2	0	84263450	84263675	84263537	20	149	9.4
17	85009950	85010950	1	chr17_85009950	Prepl	0	85010125	85010400	85010262	20	182	32.8
17	85058950	85060475	1	chr17_85058950	Prepl	0	85059325	85059350	85059337	13	13	2.5
17	85066450	85069425	1	chr17_85066450	Prepl	0	85067275	85067300	85067287	13	13	2.5
17	85069950	85072425	1	chr17_85069950	Prepl	0	85071325	85071600	85071437	29	265	37.8
17	86056450	86060125	1	chr17_86056450	Prkce	0	86056900	86057075	86056937	21	133	21.9
17	86570050	86571650	1	chr17_86570050	Prkce	0	86570700	86570950	86570837	31	232	30.2
17	86575450	86580075	1	chr17_86575450	Prkce	0	86576650	86576775	86576737	18	80	11
17	87086425	87090125	1	chr17_87086425	Socs5	0	87088700	87088725	87088712	13	13	1.8
17	87510225	87512575	1	chr17_87510225	Tacstd1	0	87509925	87510250	87510112	37	372	53.6
17	87742250	87743975	1	chr17_87742250	Kcnk12	0	87743375	87743400	87743387	13	13	2.4
17	88168500	88170500	1	chr17_88168500	Foxn2	0	88169325	88169350	88169337	18	18	3.5
17	88213650	88215400	1	chr17_88213650	Foxn2	0	88215400	88215675	88215537	47	368	38.4
17	88254025	88256550	1	chr17_88254025	Foxn2	0	88255125	88255475	88255237	32	326	22.9
17	88418550	88420900	1	chr17_88418550	Ccdc128	0	88419375	88419675	88419537	51	457	42.9
17	88614350	88615850	1	chr17_88614350	Lhcgr	0	88614525	88614625	88614562	17	65	10.6
17	90751800	90752525	1	chr17_90751800	Nrxn1	0	90752225	90752550	90752387	46	430	46.6
16	7317925	7321925	1	chr16_7317925	4930511J11Rik	0	7319900	7320450	7320312	40	451	60.6
16	7711700	7713800	1	chr16_7711700	A2bp1	0	7712450	7712800	7712662	29	297	26
16	8659350	8667250	1	chr16_8659350	Usp7	0	8664425	8664500	8664462	14	41	7
16	8667525	8674200	1	chr16_8667525	Usp7	0	8674025	8674350	8674187	38	351	36.3
16	8693550	8695475	1	chr16_8693550	Usp7	0	8694350	8694900	8694712	146	1838	89.5
16	8794150	8796575	1	chr16_8794150	1810013L24Rik	0	8795475	8795675	8795587	22	145	14.9
16	9062850	9064300	1	chr16_9062850	1810013L24Rik	0	9063450	9063525	9063487	21	60	9.9
16	9180675	9182000	1	chr16_9180675	1810013L24Rik	0	9180825	9181000	9180862	18	103	10.1
16	9984425	9987875	1	chr16_9984425	Grin2a	0	9986775	9986850	9986812	18	49	8.2
16	10380150	10383450	1	chr16_10380150	C2ta	0	10381550	10381650	10381562	16	60	7.4
16	10540725	10543575	1	chr16_10540725	Dexi	0	10541800	10542075	10541887	40	328	38.4
16	10610675	10615575	1	chr16_10610675	Socs1	0	10613775	10613975	10613862	19	125	13.5
16	11189775	11191200	1	chr16_11189775	Gspt1	0	11190425	11190725	11190587	39	331	28.8
16	11270450	11276625	1	chr16_11270450	Tnfrsf17	0	11274250	11274425	11274362	20	118	9.2
16	13030650	13035475	1	chr16_13030650	Gt4-1	0	13033350	13033600	13033487	20	159	17.5
16	13636250	13637900	1	chr16_13636250	Bfar	0	13636375	13636525	13636512	20	102	13.1
16	13660875	13664800	1	chr16_13660875	Pla2g10	0	13663550	13663750	13663637	26	176	27.2
16	13698750	13702350	1	chr16_13698750	Ntan1	0	13699475	13699925	13699637	47	504	59.4
16	13934675	13936300	1	chr16_13934675	Ifitm7	0	13934825	13935050	13934887	28	207	30.2
16	14036050	14038900	1	chr16_14036050	2900011O08Rik	0	14037525	14037875	14037687	72	643	46.8
16	15998200	16001775	1	chr16_15998200	Pkp2	0	15999675	16000025	15999812	83	731	32.5
16	16777250	16780875	1	chr16_16777250	Vpreb1	0	16779950	16779975	16779962	14	14	2.7
16	17160900	17170200	1	chr16_17160900	Pik4ca	0	17167925	17168050	17167962	24	110	19.7
16	17390600	17392875	1	chr16_17390600	2810401C16Rik	0	17392000	17392075	17392037	16	46	8.2
16	18372575	18374600	1	chr16_18372575	Comt	0	18373575	18373825	18373687	28	211	37.3
16	18392250	18395400	1	chr16_18392250	Gnb1l	0	18393200	18393400	18393212	16	115	13.5
16	18651625	18655175	1	chr16_18651625	Cldn5	0	18652025	18652150	18652037	20	76	15.1
16	20272675	20277100	1	chr16_20272675	EG224044	0	20275100	20275275	20275137	18	115	13
16	20281500	20290350	1	chr16_20281500	Abcc5	0	20288900	20289175	20289012	40	374	50.3
16	20749425	20752350	1	chr16_20749425	Chrd	0	20750550	20750625	20750562	23	68	11.9
16	21615900	21617075	1	chr16_21615900	2510009E07Rik	0	21615975	21616475	21616037	29	433	76
16	21721875	21722875	1	chr16_21721875	Ehhadh	0	21722075	21722100	21722087	14	14	2.8
16	21894100	21897625	1	chr16_21894100	Liph	0	21897125	21897150	21897137	13	13	2.4
16	21916600	21917650	1	chr16_21916600	Liph	0	21917275	21917300	21917287	13	13	2.5
16	21929625	21931800	1	chr16_21929625	Liph	0	21930725	21931050	21930862	54	468	29.5
16	22051700	22057200	1	chr16_22051700	Senp2	0	22055175	22055500	22055362	41	394	36.2
16	22328275	22337600	1	chr16_22328275	Dgkg	0	22328200	22328400	22328262	30	206	34.2
16	22357425	22358400	1	chr16_22357425	Etv5	0	22357450	22357850	22357687	66	671	50.8
16	22418250	22422675	1	chr16_22418250	Etv5	0	22421125	22421300	22421162	24	132	20.2
16	24954200	24958850	1	chr16_24954200	Lpp	0	24954075	24954325	24954162	23	193	21.4
16	25429075	25432875	1	chr16_25429075	5430420C16Rik	0	25432400	25432975	25432687	119	1390	60.6
16	29575350	29588175	1	chr16_29575350	Opa1	0	29584275	29584450	29584362	18	103	14.4
16	29598625	29604925	1	chr16_29598625	Opa1	0	29602900	29603475	29603012	36	636	90.4
16	29691600	29692475	1	chr16_29691600	Opa1	0	29691500	29691675	29691587	18	116	21.1
16	30559775	30563400	1	chr16_30559775	BC022623	0	30561175	30561475	30561287	53	502	73.6
16	30564125	30568300	1	chr16_30564125	BC022623	0	30565900	30566225	30566062	132	1092	61.2
16	30610375	30615775	1	chr16_30610375	BC022623	0	30614025	30614150	30614062	17	71	13.7
16	30854525	30860500	1	chr16_30854525	AI480653	0	30859475	30859975	30859787	114	1145	74.9
16	31217925	31223750	1	chr16_31217925	Ppp1r2	0	31220975	31221175	31221112	34	242	33.8
16	31261700	31263825	1	chr16_31261700	Apod	0	31262350	31262400	31262362	24	46	8.7
16	31809350	31814325	1	chr16_31809350	Dlgh1	0	31810650	31811000	31810812	61	579	55.6
16	32043725	32045175	1	chr16_32043725	1500031L02Rik	0	32044875	32045000	32044912	20	90	17.3
16	32220400	32224300	1	chr16_32220400	Wdr53	0	32222975	32223025	32223012	26	51	9.2
16	32427525	32434725	1	chr16_32427525	Zdhhc19	0	32430775	32431025	32430887	27	213	24.4
16	32556200	32557925	1	chr16_32556200	Tnk2	0	32557025	32557225	32557062	39	287	45.9
16	32585075	32589000	1	chr16_32585075	Tnk2	0	32586100	32586300	32586187	36	243	34.9
16	32658550	32661850	1	chr16_32658550	Muc20	0	32659775	32659925	32659862	20	103	13.4
16	33096500	33099550	1	chr16_33096500	Osbpl11	0	33098275	33098425	33098312	32	161	27.1
16	33653650	33655750	1	chr16_33653650	Heg1	0	33654425	33654625	33654512	24	170	27.4
16	33763000	33765375	1	chr16_33763000	Muc13	0	33763875	33764425	33764212	122	1524	62.4
16	33794975	33799625	1	chr16_33794975	Muc13	0	33798000	33798175	33798087	26	158	23.9
16	34955800	34960300	1	chr16_34955800	Mylk	0	34958475	34958700	34958587	33	234	19.4
16	35648175	35649775	1	chr16_35648175	Hspbap1	0	35648875	35649175	35649012	48	409	33.9
16	35750000	35750925	1	chr16_35750000	Parp14	0	35749950	35750200	35750037	27	208	20.4
16	35886125	35890175	1	chr16_35886125	Kpna1	0	35886100	35886375	35886237	36	315	26.1
16	37920200	37922075	1	chr16_37920200	Gsk3b	0	37921225	37921250	37921237	21	21	4.2
16	42225225	42226625	1	chr16_42225225	Lsamp	0	42225325	42225525	42225337	29	190	27.2
16	42493850	42496275	1	chr16_42493850	Gap43	0	42494900	42495200	42495037	82	713	65.2
16	42699050	42700950	1	chr16_42699050	Gap43	0	42700825	42701850	42701512	185	2562	138.5
16	43492075	43497100	1	chr16_43492075	336	0	43492950	43493050	43492962	21	81	13.4
16	44198525	44201250	1	chr16_44198525	Gm608	0	44200225	44200550	44200362	58	514	56.1
16	46420075	46421225	1	chr16_46420075	Pvrl3	0	46420050	46420425	46420212	104	963	55.3
16	48221925	48224425	1	chr16_48221925	Dppa2	0	48223200	48223275	48223262	27	70	13.4
16	48351875	48356100	1	chr16_48351875	Dppa2	0	48355175	48355400	48355312	46	300	33.4
16	48394750	48396975	1	chr16_48394750	Dppa2	0	48394825	48395075	48394987	33	272	35.1
16	48406425	48408000	1	chr16_48406425	Dppa2	0	48407075	48407200	48407087	15	72	11.2
16	48520475	48529850	1	chr16_48520475	Trat1	0	48528000	48528375	48528187	102	943	32
16	49722400	49724425	1	chr16_49722400	Ift57	0	49723550	49723875	49723712	75	638	48.2
16	59507425	59510900	1	chr16_59507425	BC043118	0	59510075	59510175	59510087	16	63	11.6
16	72581950	72583775	1	chr16_72581950	Robo1	0	72581975	72582075	72582062	16	54	10.6
16	76200725	76209675	1	chr16_76200725	Samsn1	0	76204275	76204675	76204487	73	701	61.2
16	76235375	76238750	1	chr16_76235375	Samsn1	0	76237025	76237150	76237062	15	68	7.7
16	76246425	76249775	1	chr16_76246425	Samsn1	0	76248275	76248350	76248337	14	39	5.2
16	78372525	78374025	1	chr16_78372525	D16Ertd472e	0	78373425	78373775	78373612	46	450	32.8
16	84651725	84654250	1	chr16_84651725	Jam2	0	84653100	84653175	84653112	14	40	6.8
16	89750050	89752225	1	chr16_89750050	Krtap11-1	0	89752025	89752475	89752212	52	640	67.5
16	89751075	89752350	1	chr16_89751075	Tiam1	0	89752025	89752475	89752212	52	640	67.5
16	89832625	89835225	1	chr16_89832625	Sod1	0	89834425	89834450	89834437	16	16	2.5
16	90051525	90056200	1	chr16_90051525	Sod1	0	90054275	90054650	90054487	102	946	62.6
16	90185975	90190350	1	chr16_90185975	Sfrs15	0	90188675	90188875	90188712	23	160	24.9
16	90198900	90200250	1	chr16_90198900	Sfrs15	0	90198550	90199000	90198787	120	1182	64.2
16	90408775	90413200	1	chr16_90408775	Hunk	0	90410800	90411025	90410937	43	293	40.6
16	91222100	91224825	1	chr16_91222100	Ifnar2	0	91223425	91223700	91223562	67	545	37.1
16	91624400	91631025	1	chr16_91624400	Cryzl1	0	91625375	91625675	91625537	51	438	29.6
16	91724300	91727175	1	chr16_91724300	Itsn1	0	91726050	91726275	91726237	29	205	32.3
16	91990950	91995175	1	chr16_91990950	Slc5a3	0	91992850	91992900	91992887	20	38	6.8
16	93695825	93697800	1	chr16_93695825	Morc3	0	93696475	93696550	93696537	17	46	8.8
16	93866275	93868925	1	chr16_93866275	Chaf1b	0	93866600	93866700	93866612	16	57	7.8
16	93889025	93895550	1	chr16_93889025	Sim2	0	93892100	93892350	93892162	27	218	31.3
16	94852425	94855150	1	chr16_94852425	Kcnj6	0	94853675	94853725	94853687	14	28	5
16	94866200	94869800	1	chr16_94866200	Kcnj6	0	94868325	94868600	94868487	29	241	22.2
16	96950325	96951775	1	chr16_96950325	Pcp4	0	96950425	96950725	96950562	65	531	29.9
19	4055550	4060150	1	chr19_4055550	Gstp2	0	4056475	4056500	4056487	13	13	2.2
19	4849100	4851250	1	chr19_4849100	Ctsf	0	4849825	4850175	4849987	61	563	40.8
19	4944925	4946950	1	chr19_4944925	Peli3	0	4945700	4945875	4945787	39	239	40.4
19	5361100	5363825	1	chr19_5361100	Banf1	0	5362325	5362575	5362437	29	217	36.3
19	6007900	6011450	1	chr19_6007900	Slc22a20	0	6009225	6009400	6009312	33	202	33.5
19	6029700	6031325	1	chr19_6029700	Capn1	0	6030900	6030950	6030912	15	29	5.4
19	6268200	6273875	1	chr19_6268200	Ehd1	0	6271650	6271775	6271687	24	112	19.8
19	6668900	6678575	1	chr19_6668900	Slc22a12	0	6675650	6675775	6675737	26	125	20.9
19	7645775	7653425	1	chr19_7645775	Lgals12	0	7650400	7650975	7650837	55	739	86.2
19	9148050	9149925	1	chr19_9148050	Scgb1a1	0	9148925	9149100	9148987	20	125	17.6
19	10195900	10198100	1	chr19_10195900	Fads2	0	10196825	10196950	10196887	15	72	5
19	10888175	10889600	1	chr19_10888175	Slc15a3	0	10888450	10888650	10888512	29	190	20.2
19	11871000	11872800	1	chr19_11871000	Stx3	0	11871600	11871725	11871712	22	98	17.9
19	11874050	11875775	1	chr19_11874050	Stx3	0	11874975	11875150	11875037	23	138	18.9
19	11889225	11891475	1	chr19_11889225	Stx3	0	11890500	11890775	11890612	26	232	37.6
19	14729550	14732500	1	chr19_14729550	Tle4	0	14731200	14731400	14731337	39	274	40.9
19	14734925	14740050	1	chr19_14734925	Tle4	0	14737725	14738250	14737912	33	563	94.8
19	14742775	14748625	1	chr19_14742775	Tle4	0	14746875	14747200	14747037	39	374	41.1
19	14851575	14854825	1	chr19_14851575	Tle4	0	14853950	14854150	14854037	17	121	8.5
19	14901775	14903700	1	chr19_14901775	Tle4	0	14902575	14903000	14902787	79	818	28.3
19	16557050	16562000	1	chr19_16557050	Gnaq	0	16558600	16558975	16558787	90	862	64.4
19	17205325	17209325	1	chr19_17205325	Gcnt1	0	17205050	17205550	17205337	190	2000	45.5
19	18672875	18677250	1	chr19_18672875	BC016495	0	18675150	18675275	18675212	14	67	11.2
19	20990150	20993200	1	chr19_20990150	Aldh1a7	0	20990850	20991225	20991037	67	637	47.3
19	23772875	23774750	1	chr19_23772875	Apba1	0	23773600	23773700	23773637	16	58	10.3
19	24617450	24619350	1	chr19_24617450	2900009I07Rik	0	24618400	24618425	24618412	13	13	2.2
19	27969925	27971625	1	chr19_27969925	Glis3	0	27970675	27971025	27970837	57	533	49.6
19	28624650	28628500	1	chr19_28624650	Slc1a1	0	28626725	28627225	28627037	31	508	63.5
19	28700225	28702600	1	chr19_28700225	Slc1a1	0	28701000	28701275	28701087	31	274	25.6
19	29073200	29076150	1	chr19_29073200	Ak3	0	29074025	29074550	29074237	123	1416	48.7
19	29350550	29352325	1	chr19_29350550	Insl6	0	29351650	29352000	29351812	84	757	48.5
19	30250925	30252200	1	chr19_30250925	Gldc	0	30251625	30251750	30251637	19	83	12.1
19	31165200	31166900	1	chr19_31165200	Cstf2t	0	31166800	31167050	31166912	27	215	20.1
19	32259500	32264175	1	chr19_32259500	Asah2	0	32260700	32261175	32260987	79	835	60.3
19	32303100	32309950	1	chr19_32303100	Asah2	0	32306675	32306800	32306712	24	111	20.2
19	32316175	32325200	1	chr19_32316175	Tmem23	0	32321400	32321800	32321537	53	575	59.6
19	32325550	32328550	1	chr19_32325550	Tmem23	0	32327125	32327375	32327212	19	154	26.5
19	32337250	32339125	1	chr19_32337250	Tmem23	0	32337275	32337475	32337387	24	164	10.6
19	32789725	32793850	1	chr19_32789725	Atad1	0	32792800	32793200	32793037	74	859	90.9
19	37552700	37554950	1	chr19_37552700	Hhex	0	37553775	37553825	37553787	17	34	6.4
19	37986275	37987700	1	chr19_37986275	Fer1l3	0	37986350	37986600	37986462	24	190	17.2
19	38127825	38128550	1	chr19_38127825	Cep55	0	38128450	38128625	38128537	18	112	16.6
19	38128700	38130850	1	chr19_38128700	Fer1l3	0	38129175	38129475	38129337	49	437	22.8
19	38571750	38574600	1	chr19_38571750	Plce1	0	38573100	38573400	38573212	20	196	31
19	38752875	38755625	1	chr19_38752875	Noc3l	0	38754550	38754575	38754562	13	13	2.2
19	40507050	40508425	1	chr19_40507050	Sorbs1	0	40507525	40507625	40507562	14	54	6.8
19	41011050	41014425	1	chr19_41011050	Zfp518	0	41012425	41012650	41012512	24	177	24.3
19	41065600	41067750	1	chr19_41065600	Dntt	0	41066975	41067150	41067037	33	179	24.3
19	41904125	41904350	1	chr19_41904125	Frat2	0	41903925	41904225	41904112	46	414	45.4
19	42047900	42051975	1	chr19_42047900	Ubtd1	0	42048875	42049000	42048937	18	80	13.1
19	42070000	42073575	1	chr19_42070000	Ankrd2	0	42072350	42072525	42072412	19	117	18.9
19	42186300	42191275	1	chr19_42186300	Avpi1	0	42189325	42189675	42189487	80	759	84.9
19	42338325	42348350	1	chr19_42338325	4933417O08Rik	0	42341600	42342025	42341987	16	232	42.7
19	42356325	42356850	1	chr19_42356325	4933417O08Rik	0	42356300	42356475	42356337	17	109	13.5
19	42368450	42381300	1	chr19_42368450	4933417O08Rik	0	42380325	42380375	42380337	14	27	4.9
19	42462325	42463150	1	chr19_42462325	Crtac1	0	42462625	42462675	42462662	15	28	4.5
19	42463325	42465525	1	chr19_42463325	D19Ertd386e	0	42463250	42463525	42463387	41	331	37.1
19	44313925	44316625	1	chr19_44313925	Scd3	0	44315175	44315400	44315312	28	208	29.2
19	44747625	44752225	1	chr19_44747625	Pax2	0	44749650	44749950	44749812	38	340	33.8
19	44861350	44863275	1	chr19_44861350	6030443O07Rik	0	44862100	44862375	44862187	29	257	23
19	45081300	45081600	1	chr19_45081300	Pdzd7	0	45081300	45081450	45081387	19	100	14.1
19	45664650	45667275	1	chr19_45664650	5330431N19Rik	0	45665750	45665850	45665787	16	62	8.7
19	45674375	45676725	1	chr19_45674375	5330431N19Rik	0	45675575	45675725	45675662	23	121	17.7
19	45934350	45937675	1	chr19_45934350	Kcnip2	0	45935425	45935675	45935562	26	210	27.2
19	46575525	46587275	1	chr19_46575525	Trim8	0	46578150	46578250	46578187	24	91	13.4
19	46600175	46604425	1	chr19_46600175	Sfxn2	0	46603075	46603250	46603187	20	120	15.4
19	46883300	46894500	1	chr19_46883300	Nt5c2	0	46889500	46889700	46889587	37	253	38.5
19	47035025	47038725	1	chr19_47035025	Nt5c2	0	47036925	47036975	47036937	13	26	4.3
19	47071325	47071525	1	chr19_47071325	Ina	0	47071250	47071675	47071512	89	1062	71.6
19	47378350	47387850	1	chr19_47378350	Neurl	0	47381500	47381525	47381512	13	13	2.5
19	47758250	47759825	1	chr19_47758250	Col17a1	0	47759250	47759275	47759262	14	14	2.8
19	53074650	53078050	1	chr19_53074650	Xpnpep1	0	53075500	53075625	53075562	20	91	14.9
19	53111100	53112225	1	chr19_53111100	Xpnpep1	0	53111800	53112100	53111837	20	222	31.4
19	53336500	53338900	1	chr19_53336500	Mxi1	0	53338025	53338175	53338062	19	108	15.2
19	53749900	53752050	1	chr19_53749900	Smc3	0	53751100	53751275	53751162	26	171	31.3
19	53874200	53875725	1	chr19_53874200	Pdcd4	0	53874700	53874900	53874837	22	163	27.5
19	55196925	55198400	1	chr19_55196925	Tectb	0	55197325	55197425	55197337	14	53	7.1
19	55607100	55610850	1	chr19_55607100	Tcf7l2	0	55609100	55609175	55609112	14	41	3.9
19	55641025	55643325	1	chr19_55641025	Tcf7l2	0	55642200	55642550	55642387	55	499	37.3
19	56562575	56567900	1	chr19_56562575	Dclre1a	0	56563575	56563875	56563712	27	242	39.5
19	56715375	56720900	1	chr19_56715375	Adrb1	0	56719350	56719525	56719437	22	133	16.1
19	57081350	57083100	1	chr19_57081350	Ablim1	0	57081950	57081975	57081962	13	13	2.1
18	4403325	4405925	1	chr18_4403325	Papd1	0	4405925	4406025	4405937	14	56	8.1
18	6275100	6277800	1	chr18_6275100	Kif5b	0	6275425	6275825	6275662	46	497	57
18	10864150	10870175	1	chr18_10864150	Mib1	0	10866150	10866550	10866287	50	555	45.7
18	12041650	12044425	1	chr18_12041650	6030446N20Rik	0	12043125	12043350	12043262	22	167	13.8
18	12053525	12057300	1	chr18_12053525	6030446N20Rik	0	12055125	12055275	12055162	18	102	17.7
18	12357950	12359825	1	chr18_12357950	3110002H16Rik	0	12359725	12359925	12359812	32	223	38
18	12382350	12384100	1	chr18_12382350	Npc1	0	12382500	12382675	12382587	19	114	18.6
18	12652625	12654150	1	chr18_12652625	2810439F02Rik	0	12652725	12652925	12652762	19	123	14.9
18	14817600	14821400	1	chr18_14817600	Kctd1	0	14819475	14819725	14819587	39	304	21.9
18	16180850	16182000	1	chr18_16180850	Chst9	0	16181500	16181800	16181687	40	335	22.3
18	20748850	20749450	1	chr18_20748850	Dsg2	0	20748625	20748850	20748787	18	132	22.1
18	20891600	20894500	1	chr18_20891600	B4galt6	0	20892900	20892975	20892912	24	64	11.9
18	21073150	21077475	1	chr18_21073150	Rnf125	0	21075650	21075750	21075712	15	56	7.5
18	24358525	24359700	1	chr18_24358525	Galnt1	0	24358575	24358725	24358687	16	90	7.3
18	25003525	25016325	1	chr18_25003525	Mocos	0	25011700	25011950	25011837	42	331	27.9
18	25531600	25535050	1	chr18_25531600	Brunol4	0	25532475	25532775	25532612	21	217	22.8
18	30263250	30266500	1	chr18_30263250	Pik3c3	0	30264350	30265075	30264812	197	2459	113.7
18	31710575	31713625	1	chr18_31710575	Slc25a46	0	31711725	31712125	31711937	122	1162	70.2
18	33954200	33963875	1	chr18_33954200	D0H4S114	0	33960575	33961075	33960837	95	1118	76.2
18	34071700	34077650	1	chr18_34071700	Apc	0	34075500	34075675	34075562	22	134	24
18	34120925	34125275	1	chr18_34120925	Apc	0	34123025	34123525	34123137	39	487	59.2
18	34217775	34219700	1	chr18_34217775	Epb4.1l4a	0	34217800	34218125	34217937	48	461	56.1
18	34242425	34244325	1	chr18_34242425	Apc	0	34243025	34243225	34243087	27	178	23.6
18	34729975	34733250	1	chr18_34729975	4933408B17Rik	0	34730800	34731075	34730887	28	240	23
18	35131325	35132475	1	chr18_35131325	Hspa9	0	35131650	35131725	35131712	15	39	6.4
18	35167000	35175375	1	chr18_35167000	Ctnna1	0	35169300	35169550	35169437	47	364	39.8
18	35799575	35803825	1	chr18_35799575	5133400G04Rik	0	35802050	35802225	35802137	36	214	32.5
18	36376700	36384300	1	chr18_36376700	Pura	0	36380125	36380175	36380137	22	42	6.6
18	36533700	36548225	1	chr18_36533700	0610010O12Rik	0	36541525	36541875	36541662	62	603	67.9
18	37896250	37897875	1	chr18_37896250	Pcdhgc3	0	37897475	37897800	37897637	63	550	42
18	37909925	37913075	1	chr18_37909925	Pcdhgc3	0	37910950	37911100	37911012	18	97	11.3
18	37965300	37969675	1	chr18_37965300	Diap1	0	37966675	37966950	37966812	53	459	47.5
18	38206500	38209850	1	chr18_38206500	Centd3	0	38207800	38208000	38207887	26	171	19.4
18	38252250	38254075	1	chr18_38252250	Pcdh1	0	38253125	38253175	38253162	14	27	5.2
18	38273325	38276175	1	chr18_38273325	Pcdh1	0	38274700	38275025	38274862	91	773	53.6
18	38643550	38651200	1	chr18_38643550	Ndfip1	0	38650300	38650450	38650312	18	98	19.4
18	38698875	38701200	1	chr18_38698875	Spry4	0	38699850	38699875	38699862	19	19	3.8
18	38703400	38704475	1	chr18_38703400	Spry4	0	38704375	38704425	38704387	13	26	4.2
18	38751100	38753200	1	chr18_38751100	Spry4	0	38752000	38752175	38752062	19	123	18.7
18	39028150	39032375	1	chr18_39028150	Arhgap26	0	39032175	39032250	39032237	16	45	8
18	39048475	39050300	1	chr18_39048475	Fgf1	0	39049125	39049300	39049162	21	142	23
18	39192650	39195900	1	chr18_39192650	LOC545253	0	39193875	39194100	39193987	27	198	27.2
18	39250625	39250950	1	chr18_39250625	Arhgap26	0	39250800	39250850	39250812	25	49	9.2
18	44689350	44692700	1	chr18_44689350	Myot	0	44690700	44690925	44690812	35	264	22.8
18	46837900	46843975	1	chr18_46837900	Atg12	0	46838875	46839225	46839062	39	403	45.1
18	47598925	47601425	1	chr18_47598925	Sema6a	0	47600550	47601025	47600687	29	451	58.1
18	47772325	47773825	1	chr18_47772325	Sema6a	0	47772975	47773125	47773062	23	123	19
18	49872325	49872775	1	chr18_49872325	Dtwd2	0	49872350	49872550	49872387	24	167	18.2
18	49895750	49897575	1	chr18_49895750	Dtwd2	0	49896125	49896375	49896262	33	255	21.9
18	53389275	53392300	1	chr18_53389275	Snx2	0	53390550	53390850	53390712	42	336	33.4
18	56867075	56873000	1	chr18_56867075	2012-03-03	0	56870150	56870500	56870362	34	350	42.2
18	57511200	57513275	1	chr18_57511200	3000002B06Rik	0	57511525	57511825	57511687	56	478	32.7
18	57795900	57799275	1	chr18_57795900	Slc12a2	0	57796650	57797025	57796837	49	475	33.5
18	60785250	60787625	1	chr18_60785250	Ndst1	0	60786775	60786950	60786812	15	100	13.1
18	60891850	60893500	1	chr18_60891850	Rps14	0	60892500	60892550	60892512	23	44	8.4
18	60946500	60953100	1	chr18_60946500	Cd74	0	60948400	60948425	60948412	13	13	1.7
18	61361350	61362475	1	chr18_61361350	Slc26a2	0	61361550	61361750	61361562	23	156	23.3
18	64138625	64140775	1	chr18_64138625	St8sia3	0	64139275	64139825	64139537	22	369	57.7
18	65058525	65059450	1	chr18_65058525	Nedd4l	0	65058650	65058825	65058712	17	107	16.1
18	65247050	65248500	1	chr18_65247050	253	0	65247950	65248175	65248087	33	255	36.4
18	65540675	65543350	1	chr18_65540675	Malt1	0	65541950	65542225	65542087	39	325	29.9
18	65643925	65648850	1	chr18_65643925	Malt1	0	65646000	65646225	65646062	42	308	41.1
18	65728400	65734150	1	chr18_65728400	5330437I02Rik	0	65730975	65731050	65731012	15	44	7
18	65734625	65743925	1	chr18_65734625	5330437I02Rik	0	65741650	65741800	65741687	20	113	20.1
18	65764750	65768025	1	chr18_65764750	5330437I02Rik	0	65766650	65766775	65766662	20	94	15.5
18	66539375	66541200	1	chr18_66539375	Pmaip1	0	66540200	66540450	66540312	48	376	32.3
18	66550125	66556025	1	chr18_66550125	Pmaip1	0	66554475	66554875	66554687	57	608	49.7
18	66596200	66597350	1	chr18_66596200	Pmaip1	0	66596425	66596450	66596437	13	13	2.4
18	67448375	67450500	1	chr18_67448375	Impa2	0	67449925	67450075	67449937	31	160	24.4
18	67466275	67466850	1	chr18_67466275	Cidea	0	67466775	67467400	67466937	91	1366	108.4
18	67621375	67625175	1	chr18_67621375	BC019561	0	67622850	67623625	67623337	73	1159	150.5
18	68281400	68283825	1	chr18_68281400	4933403F05Rik	0	68283050	68283075	68283062	26	26	5.2
18	69904400	69909350	1	chr18_69904400	Tcf4	0	69907525	69907925	69907712	101	1061	75.8
18	74128250	74131975	1	chr18_74128250	Mro	0	74129575	74129850	74129737	37	311	39.5
18	75566125	75568500	1	chr18_75566125	Smad7	0	75567250	75567375	75567362	18	78	14.2
18	75575025	75575975	1	chr18_75575025	Smad7	0	75575100	75575300	75575212	25	170	30
18	75580900	75583225	1	chr18_75580900	Smad7	0	75582400	75582550	75582412	14	83	12.7
18	75702200	75707250	1	chr18_75702200	Smad7	0	75704725	75705100	75704912	97	934	58.4
18	75708000	75713250	1	chr18_75708000	Smad7	0	75710375	75710550	75710437	24	155	22.9
18	76022550	76027975	1	chr18_76022550	Gm672	0	76026850	76027075	76026962	37	257	31.4
18	76759625	76762425	1	chr18_76759625	Corl2	0	76760625	76761000	76760812	84	788	67.2
18	76797900	76801175	1	chr18_76797900	Corl2	0	76799750	76800025	76799862	26	225	29
18	77959175	77962750	1	chr18_77959175	Atp5a1	0	77961450	77961800	77961662	78	702	45
18	79135100	79135650	1	chr18_79135100	Setbp1	0	79135000	79135275	79135187	21	184	20.8
18	79145625	79146875	1	chr18_79145625	Slc14a2	0	79145950	79146125	79146012	19	113	19.3
18	80345000	80348150	1	chr18_80345000	1110032A13Rik	0	80347950	80348300	80348112	36	376	39.1
18	81358775	81361200	1	chr18_81358775	Sall3	0	81359375	81359675	81359512	45	411	37.1
18	82680825	82682075	1	chr18_82680825	Mbp	0	82681050	82681100	82681062	13	26	3.9
18	82733775	82736375	1	chr18_82733775	Mbp	0	82735125	82735350	82735237	24	169	18.3
18	82913200	82915800	1	chr18_82913200	Zfp516	0	82913525	82913600	82913562	17	47	8.5
18	84841650	84843075	1	chr18_84841650	B230399E16Rik	0	84842600	84842950	84842662	32	341	47.3
X	6585200	6587850	1	chrX_6585200	Ppp1r3f	0	6586625	6586650	6586637	13	13	2.4
X	7159150	7160150	1	chrX_7159150	Glod5	0	7160075	7160175	7160087	15	55	6.1
X	7165050	7166650	1	chrX_7165050	Glod5	0	7165525	7165950	7165687	35	426	48.7
X	7169500	7170600	1	chrX_7169500	Glod5	0	7170150	7170325	7170262	17	107	12.6
X	7207300	7211050	1	chrX_7207300	Suv39h1	0	7207975	7208325	7208162	53	485	37
X	7340300	7340325	1	chrX_7340300	Tbc1d25	0	7340175	7340400	7340287	25	179	21.9
X	10960175	10960975	1	chrX_10960175	Bcor	0	10960250	10960350	10960262	13	52	5.7
X	11082950	11084900	1	chrX_11082950	Bcor	0	11084125	11084400	11084237	31	262	22.6
X	11112650	11115225	1	chrX_11112650	Bcor	0	11114150	11114450	11114287	39	348	22.1
X	11203975	11206500	1	chrX_11203975	Atp6ap2	0	11204725	11204975	11204812	25	202	16.1
X	12168025	12172500	1	chrX_12168025	Usp9x	0	12171100	12171375	12171262	34	276	18.9
X	33245525	33249350	1	chrX_33245525	Slc25a5	0	33248800	33248975	33248887	18	113	20.4
X	38675025	38676775	1	chrX_38675025	Sh2d1a	0	38676600	38677075	38676837	53	634	37.8
X	44549525	44551725	1	chrX_44549525	Utp14a	0	44549650	44550100	44549837	39	427	25.6
X	48428000	48429275	1	chrX_48428000	Gpc4	0	48428750	48428775	48428762	13	13	2.1
X	48432850	48435275	1	chrX_48432850	Gpc4	0	48433825	48434050	48433937	31	216	17
X	48437975	48438325	1	chrX_48437975	Gpc4	0	48438250	48438325	48438287	14	40	5
X	48591825	48593775	1	chrX_48591825	325	0	48593300	48593700	48593437	36	391	41.3
X	69922250	69924275	1	chrX_69922250	Slc6a8	0	69922300	69922375	69922337	14	40	5.6
X	70046775	70052950	1	chrX_70046775	Ssr4	0	70050300	70050500	70050337	20	138	20.2
X	70067525	70070825	1	chrX_70067525	Pdzd4	0	70069800	70069925	70069862	16	74	9.1
X	79156400	79156925	1	chrX_79156400	Dmd	0	79156725	79156750	79156737	13	13	2.1
X	98207400	98209550	1	chrX_98207400	Rgag4	0	98208100	98208275	98208237	16	105	14
X	99455275	99456325	1	chrX_99455275	4930519F16Rik	0	99455300	99455475	99455337	17	101	11.6
X	99633700	99636275	1	chrX_99633700	Tsx	0	99635000	99635225	99635112	28	200	22.9
X	99640050	99642775	1	chrX_99640050	Tsx	0	99640925	99641125	99641037	23	160	25.6
X	132380100	132381000	1	chrX_132380100	2810402A17Rik	0	132380725	132380875	132380812	19	94	9.8
X	135127875	135129550	1	chrX_135127875	Cldn2	0	135129150	135129375	135129262	27	196	22.3
X	147984225	147985650	1	chrX_147984225	Gpr143	0	147985500	147985825	147985687	31	273	20.4
X	148459050	148460125	1	chrX_148459050	Rragb	0	148459850	148460075	148459962	24	177	21.6
X	153161550	153162700	1	chrX_153161550	Smpx	0	153161675	153161850	153161737	21	123	9.9
X	157353050	157354225	1	chrX_157353050	Nhs	0	157354000	157354450	157354137	38	425	44
1	4792825	4794875	1	chr1_4792825	Lypla1	0	4793150	4793375	4793237	22	173	28.5
1	4958700	4962400	1	chr1_4958700	Tcea1	0	4962375	4962825	4962562	87	869	41.3
1	6272250	6272600	1	chr1_6272250	Rb1cc1	0	6272400	6272625	6272512	21	156	12.8
1	11380500	11381675	1	chr1_11380500	A830018L16Rik	0	11381250	11381450	11381387	22	157	16.2
1	12727350	12732725	1	chr1_12727350	Slco5a1	0	12729700	12730450	12729887	75	1359	141.2
1	12820850	12821925	1	chr1_12820850	Slco5a1	0	12821300	12821600	12821412	38	316	35.1
1	13060900	13072700	1	chr1_13060900	Prdm14	0	13069900	13070550	13070287	71	1174	91.2
1	15775775	15777700	1	chr1_15775775	Terf1	0	15776700	15777275	15777037	79	914	73.9
1	20852125	20853850	1	chr1_20852125	Paqr8	0	20853250	20853375	20853287	27	125	22.5
1	20890675	20898950	1	chr1_20890675	Mcm3	0	20893775	20894000	20893837	28	227	34.5
1	21240425	21243675	1	chr1_21240425	Tmem14a	0	21241675	21241900	21241762	29	218	26.7
1	22362675	22362900	1	chr1_22362675	Rims1	0	22362500	22362725	22362612	25	191	21.5
1	22421075	22422100	1	chr1_22421075	Kcnq5	0	22420925	22421375	22421087	59	612	10.1
1	25831925	25832975	1	chr1_25831925	Bai3	0	25832625	25832825	25832737	19	135	11
1	34009300	34010625	1	chr1_34009300	Dst	0	34010250	34010450	34010337	24	156	24.6
1	34046550	34052125	1	chr1_34046550	B230209C24Rik	0	34048300	34048600	34048412	36	363	53.8
1	35885400	35890750	1	chr1_35885400	Hs6st1	0	35888875	35889225	35889062	95	839	61.9
1	36026075	36038275	1	chr1_36026075	Ugcgl1	0	36029825	36029850	36029837	15	15	2.8
1	36747375	36751625	1	chr1_36747375	Zap70	0	36748775	36748825	36748787	15	29	5.4
1	36798400	36802725	1	chr1_36798400	Zap70	0	36798675	36798800	36798687	13	60	7
1	36906400	36908350	1	chr1_36906400	Tmem131	0	36907475	36907650	36907512	24	160	24
1	36944500	36946900	1	chr1_36944500	Tmem131	0	36946375	36946400	36946387	19	19	3.8
1	37072200	37077175	1	chr1_37072200	Cnga3	0	37074775	37074925	37074787	29	137	22.1
1	38767800	38769525	1	chr1_38767800	Lonrf2	0	38768525	38768925	38768587	20	237	40.8
1	39865500	39871175	1	chr1_39865500	Il1r2	0	39868475	39868650	39868587	18	109	17.7
1	51516775	51518550	1	chr1_51516775	Obfc2a	0	51517575	51517775	51517637	26	168	24.4
1	51823775	51824825	1	chr1_51823775	Myo1b	0	51824000	51824150	51824087	16	92	14
1	53695350	53696325	1	chr1_53695350	Stk17b	0	53695700	53695725	53695712	13	13	2.1
1	54529275	54530525	1	chr1_54529275	Ankrd44	0	54530100	54530425	54530237	55	490	48.7
1	55051375	55055475	1	chr1_55051375	Hspe1	0	55053075	55053400	55053212	57	500	40.1
1	55142925	55144075	1	chr1_55142925	Mars2	0	55143100	55143450	55143287	42	399	28.6
1	56641525	56642150	1	chr1_56641525	Hsfy2	0	56641975	56642375	56642187	49	521	33.9
1	56897150	56898800	1	chr1_56897150	Hsfy2	0	56898150	56898200	56898162	13	26	2.2
1	57555850	57557825	1	chr1_57555850	2810022L02Rik	0	57556825	57556900	57556862	15	44	7.4
1	57933500	57935025	1	chr1_57933500	Sgol2	0	57933525	57933800	57933637	41	343	33
1	59365375	59373625	1	chr1_59365375	Fzd7	0	59367675	59368125	59367887	74	807	60.2
1	59390100	59396225	1	chr1_59390100	Fzd7	0	59393525	59393550	59393537	19	19	3.5
1	59416300	59417675	1	chr1_59416300	Fzd7	0	59417500	59417750	59417512	17	149	15.2
1	60793725	60799275	1	chr1_60793725	Ctla4	0	60798125	60798200	60798187	30	87	15.8
1	62670050	62673800	1	chr1_62670050	Pard3b	0	62672150	62672425	62672287	37	298	37.3
1	62698800	62704025	1	chr1_62698800	Pard3b	0	62701800	62702200	62702037	43	579	72.9
1	62704275	62712550	1	chr1_62704275	Pard3b	0	62706825	62706925	62706837	25	85	14.5
1	62717200	62719725	1	chr1_62717200	Pard3b	0	62717800	62718200	62718037	77	796	66.2
1	63070250	63074975	1	chr1_63070250	Ndufs1	0	63072275	63072625	63072462	31	328	50.1
1	63143575	63147375	1	chr1_63143575	Eef1b2	0	63144625	63144675	63144662	23	45	8.8
1	63373275	63376850	1	chr1_63373275	Adam23	0	63376450	63376725	63376612	45	368	30.3
1	64818500	64820700	1	chr1_64818500	4921521F21Rik	0	64819200	64819650	64819462	64	685	44.3
1	70967675	70970375	1	chr1_70967675	A830006F12Rik	0	70968775	70969150	70968962	57	553	34.9
1	71604650	71608100	1	chr1_71604650	Fn1	0	71606800	71607075	71606887	41	347	41.3
1	72244350	72248775	1	chr1_72244350	Xrcc5	0	72246300	72246475	72246412	35	211	28.9
1	72604775	72607050	1	chr1_72604775	Rpl37a	0	72605425	72605800	72605637	42	436	28.5
1	72737225	72741725	1	chr1_72737225	Igfbp2	0	72739450	72739700	72739537	42	354	41.6
1	72892000	72893900	1	chr1_72892000	Tnp1	0	72893600	72893875	72893762	39	339	34.2
1	74042275	74047350	1	chr1_74042275	Rufy4	0	74044550	74044800	74044662	42	311	38.4
1	74754475	74760675	1	chr1_74754475	Wnt10a	0	74758125	74758500	74758312	120	1179	80.7
1	75109800	75111500	1	chr1_75109800	Tuba4a	0	75110800	75111050	75110962	29	214	27.7
1	75325200	75329000	1	chr1_75325200	Accn4	0	75326325	75326475	75326387	15	85	11.6
1	75392175	75396925	1	chr1_75392175	Obsl1	0	75395175	75395475	75395337	33	309	35.2
1	75470925	75473425	1	chr1_75470925	Slc4a3	0	75472125	75472400	75472287	29	236	39.1
1	77328175	77338850	1	chr1_77328175	Pax3	0	77337050	77337325	77337187	29	267	35.1
1	77339400	77347225	1	chr1_77339400	Pax3	0	77344875	77345250	77345037	38	439	59.1
1	77352175	77360250	1	chr1_77352175	Pax3	0	77355825	77356100	77355962	38	304	28.6
1	77385725	77390550	1	chr1_77385725	Pax3	0	77386200	77386275	77386212	14	42	7.4
1	82698125	82699875	1	chr1_82698125	Hrb	0	82699750	82699875	82699762	15	71	13.4
1	84515000	84518100	1	chr1_84515000	Trip12	0	84516450	84516500	84516462	16	30	4.9
1	84737375	84746775	1	chr1_84737375	Trip12	0	84746075	84746300	84746187	24	176	30.6
1	88016600	88022000	1	chr1_88016600	Psmd1	0	88018850	88019375	88019137	81	922	69.7
1	88067100	88068625	1	chr1_88067100	B3gnt7	0	88067775	88068025	88067862	31	238	42
1	88179075	88181825	1	chr1_88179075	Nmur1	0	88179950	88180150	88180087	22	150	22.3
1	88301400	88307800	1	chr1_88301400	Ptma	0	88304375	88304525	88304387	22	116	17.6
1	89053625	89068975	1	chr1_89053625	Chrng	0	89061775	89062100	89061937	103	877	67.2
1	89143600	89145600	1	chr1_89143600	Efhd1	0	89145500	89145525	89145512	15	15	2.8
1	89516350	89519000	1	chr1_89516350	Atg16l1	0	89518350	89518450	89518362	15	56	10.8
1	90296925	90299175	1	chr1_90296925	Glrp1	0	90298000	90298100	90298087	17	62	9.9
1	90498950	90502950	1	chr1_90498950	Arl4c	0	90500025	90500450	90500212	55	568	65.9
1	90629750	90632925	1	chr1_90629750	Arl4c	0	90631750	90631850	90631837	23	84	16.8
1	91019075	91023075	1	chr1_91019075	Sh3bp4	0	91020450	91020625	91020587	20	132	22.5
1	91295175	91300850	1	chr1_91295175	Sh3bp4	0	91296750	91296900	91296862	20	104	18.2
1	91690350	91692600	1	chr1_91690350	Gbx2	0	91691475	91691700	91691587	27	205	26.5
1	91698400	91712300	1	chr1_91698400	Gbx2	0	91707625	91708025	91707737	57	637	64.5
1	92323925	92324150	1	chr1_92323925	Cops8	0	92323900	92324100	92323987	21	146	19.1
1	92348500	92355000	1	chr1_92348500	Cops8	0	92349825	92350050	92349862	24	176	27.1
1	92966500	92968225	1	chr1_92966500	Lrrfip1	0	92967175	92967200	92967187	13	13	2.1
1	93947725	93950300	1	chr1_93947725	Twist2	0	93949825	93949875	93949862	14	27	5.3
1	94013325	94014400	1	chr1_94013325	Hdac4	0	94013975	94014000	94013987	14	14	2.8
1	94260100	94265050	1	chr1_94260100	Ndufa10	0	94262575	94262850	94262687	50	410	40.9
1	103584200	103585075	1	chr1_103584200	C230078M14Rik	0	103584725	103585025	103584887	53	435	25.8
1	106839275	106840875	1	chr1_106839275	Cdh20	0	106840175	106840450	106840362	37	315	30.2
1	112601575	112602625	1	chr1_112601575	Cdh19	0	112602475	112602700	112602562	30	228	21.5
1	120516600	120519175	1	chr1_120516600	Tcfcp2l1	0	120517425	120517475	120517437	24	47	8.9
1	120603975	120604925	1	chr1_120603975	Gli2	0	120604100	120604275	120604237	28	146	22.2
1	120830825	120836425	1	chr1_120830825	Tcfcp2l1	0	120831425	120831500	120831487	15	43	7.5
1	120899850	120911650	1	chr1_120899850	Gli2	0	120904475	120904500	120904487	14	14	2.7
1	120973950	120975625	1	chr1_120973950	Gli2	0	120975275	120975300	120975287	13	13	2.5
1	120994600	120995650	1	chr1_120994600	Gli2	0	120995100	120995300	120995187	28	181	19.6
1	121174050	121177600	1	chr1_121174050	Inhbb	0	121176000	121176350	121176162	60	559	49
1	121223600	121229150	1	chr1_121223600	Inhbb	0	121226225	121226700	121226362	38	523	76.7
1	121322925	121328000	1	chr1_121322925	2500001K11Rik	0	121325175	121325425	121325287	64	511	51.8
1	129825975	129828575	1	chr1_129825975	Rab3gap1	0	129828450	129828800	129828637	30	313	13.3
1	130686775	130689350	1	chr1_130686775	Cxcr4	0	130687725	130687925	130687762	29	192	28.5
1	132377200	132379300	1	chr1_132377200	Zp3r	0	132378050	132378075	132378062	15	15	2.9
1	133305350	133308150	1	chr1_133305350	2700049P18Rik	0	133306325	133306575	133306512	23	190	26.1
1	133340800	133341850	1	chr1_133340800	Srgap2	0	133341850	133341875	133341862	13	13	2.5
1	133341550	133342625	1	chr1_133341550	2700049P18Rik	0	133341850	133341875	133341862	13	13	2.5
1	134064250	134065900	1	chr1_134064250	44	0	134065400	134065525	134065437	35	150	28.8
1	134089725	134098150	1	chr1_134089725	Lemd1	0	134091150	134091400	134091287	46	351	27.7
1	134113175	134116775	1	chr1_134113175	Klhdc8a	0	134115825	134116100	134115962	43	365	43
1	134168400	134171350	1	chr1_134168400	Nuak2	0	134169850	134169875	134169862	13	13	1.8
1	134201425	134205550	1	chr1_134201425	Ripk5	0	134203025	134203050	134203037	13	13	2.5
1	134298600	134301375	1	chr1_134298600	Rbbp5	0	134298575	134299000	134298762	81	906	65.6
1	134677800	134681725	1	chr1_134677800	Lrrn2	0	134678375	134678675	134678537	83	727	69.4
1	134804775	134813525	1	chr1_134804775	Mdm4	0	134808875	134809125	134808962	44	358	32.1
1	134839775	134841250	1	chr1_134839775	Mdm4	0	134840325	134840450	134840387	17	74	11.2
1	134906750	134909175	1	chr1_134906750	Ppp1r15b	0	134907775	134908125	134907937	43	406	33.4
1	135036350	135038500	1	chr1_135036350	Plekha6	0	135036750	135036875	135036787	26	119	22.1
1	135220400	135228075	1	chr1_135220400	Etnk2	0	135225100	135225600	135225337	171	1883	101.4
1	135235525	135240675	1	chr1_135235525	Etnk2	0	135239175	135239350	135239212	34	200	27
1	135259850	135263475	1	chr1_135259850	Sox13	0	135261925	135262125	135262062	24	172	23.9
1	135275675	135276550	1	chr1_135275675	Sox13	0	135275950	135276025	135275987	22	61	11
1	136004425	136006450	1	chr1_136004425	Mybph	0	136005575	136005850	136005712	42	334	44.1
1	136316125	136320450	1	chr1_136316125	Klhl12	0	136317425	136317525	136317437	16	56	8.4
1	136348925	136354100	1	chr1_136348925	Jarid1b	0	136351425	136351800	136351637	142	1295	48
1	136381200	136390200	1	chr1_136381200	Rabif	0	136386950	136387400	136387212	82	888	80.3
1	136993925	137003800	1	chr1_136993925	Gpr37l1	0	137002475	137002650	137002537	25	150	26.5
1	137030400	137035275	1	chr1_137030400	Elf3	0	137034000	137034350	137034187	71	682	60.9
1	137368675	137372000	1	chr1_137368675	Ipo9	0	137370075	137370350	137370187	29	231	30.7
1	137470600	137473350	1	chr1_137470600	Nav1	0	137471800	137472000	137471887	21	145	15.1
1	137491025	137496025	1	chr1_137491025	Csrp1	0	137493375	137493700	137493537	73	668	60.6
1	137539900	137541850	1	chr1_137539900	Csrp1	0	137540675	137540850	137540737	25	131	20.4
1	137608450	137610750	1	chr1_137608450	Tnni1	0	137608675	137608725	137608687	14	27	4.6
1	138381200	138385425	1	chr1_138381200	Kif14	0	138382850	138382925	138382912	23	60	9.8
1	141310825	141315350	1	chr1_141310825	Aspm	0	141311025	141311375	141311212	105	959	73.3
1	142004775	142005950	1	chr1_142004775	Cfh	0	142005075	142005175	142005162	14	49	5.2
1	153277800	153280450	1	chr1_153277800	Rnf2	0	153278025	153278350	153278162	40	354	37.7
1	153305175	153308900	1	chr1_153305175	Niban	0	153306900	153307075	153307037	18	111	19.3
1	153640200	153645325	1	chr1_153640200	1700025G04Rik	0	153643075	153643300	153643212	37	277	31.3
1	154333875	154337625	1	chr1_154333875	Glt25d2	0	154335350	154335750	154335562	49	521	40.2
1	154554575	154559550	1	chr1_154554575	Ncf2	0	154556050	154556225	154556112	34	209	32.8
1	154607075	154608875	1	chr1_154607075	Ncf2	0	154607775	154607850	154607812	14	41	5.9
1	154676200	154680550	1	chr1_154676200	Smg7	0	154677975	154678225	154678112	33	264	38.8
1	154771500	154774400	1	chr1_154771500	Nmnat2	0	154771725	154771775	154771737	19	34	5.9
1	154798325	154800700	1	chr1_154798325	Lamc2	0	154799925	154800200	154800087	62	500	44.5
1	154977650	154980600	1	chr1_154977650	Lamc1	0	154978700	154978950	154978837	47	358	32.4
1	155138425	155141275	1	chr1_155138425	Lamc1	0	155138825	155139125	155138962	36	359	61.9
1	155253825	155258850	1	chr1_155253825	Dhx9	0	155256375	155256575	155256437	22	161	25.1
1	155351800	155353475	1	chr1_155351800	Npl	0	155352450	155352700	155352562	36	302	40.8
1	155439150	155442800	1	chr1_155439150	Rgs16	0	155439900	155440025	155439962	21	92	12.7
1	155840350	155844675	1	chr1_155840350	Glul	0	155842900	155843550	155843037	38	645	73.2
1	156816800	156820050	1	chr1_156816800	Ier5	0	156817350	156817600	156817437	38	288	37
1	156848125	156849675	1	chr1_156848125	Ier5	0	156848725	156848750	156848737	13	13	2.1
1	157834050	157839725	1	chr1_157834050	Tor1aip2	0	157838900	157838925	157838912	15	15	2.8
1	158818175	158821475	1	chr1_158818175	Ralgps2	0	158820175	158820550	158820337	55	562	45.8
1	158828325	158836075	1	chr1_158828325	Ralgps2	0	158834700	158834875	158834787	23	137	21.5
1	161486825	161487475	1	chr1_161486825	Rfwd2	0	161487250	161487375	161487312	18	80	9.6
1	162145400	162149475	1	chr1_162145400	Cacybp	0	162147025	162147150	162147087	15	70	8.5
1	162570950	162572775	1	chr1_162570950	Rc3h1	0	162571525	162571775	162571612	37	270	36
1	163754950	163760350	1	chr1_163754950	Pigc	0	163755550	163755750	163755612	17	125	25
1	165855150	165855750	1	chr1_165855150	2810422O20Rik	0	165854950	165855200	165855062	40	297	31
1	166358075	166361075	1	chr1_166358075	Atp1b1	0	166359025	166359100	166359037	13	39	6.3
1	167448450	167451175	1	chr1_167448450	Mpzl1	0	167450700	167451050	167450812	26	274	32.1
1	169125500	169127425	1	chr1_169125500	Uck2	0	169126250	169126500	169126437	38	284	50
1	169751625	169754100	1	chr1_169751625	Lmx1a	0	169752600	169752850	169752737	33	262	29.6
1	170217025	170221050	1	chr1_170217025	Lmx1a	0	170219625	170219800	170219662	30	177	24.6
1	172357450	172359625	1	chr1_172357450	Olfml2b	0	172358275	172358525	172358387	27	219	25.3
1	172725475	172731425	1	chr1_172725475	Dusp12	0	172726150	172726300	172726187	26	120	20.1
1	173209600	173211875	1	chr1_173209600	1190002J23Rik	0	173209725	173209750	173209737	13	13	2.2
1	174292100	174293075	1	chr1_174292100	Slamf9	0	174292075	174292300	174292212	28	211	15.8
1	175183700	175187150	1	chr1_175183700	Darc	0	175185250	175185500	175185412	51	423	56.4
1	179392375	179392775	1	chr1_179392375	Zfp238	0	179392525	179392675	179392637	16	85	10.1
1	179590075	179591000	1	chr1_179590075	1700016C15Rik	0	179590150	179590450	179590287	44	396	38.4
1	180380350	180382175	1	chr1_180380350	D230039L06Rik	0	180381350	180381475	180381387	22	105	19.1
1	181108900	181110800	1	chr1_181108900	Tfb2m	0	181109025	181109200	181109087	18	105	17.7
1	181112150	181115750	1	chr1_181112150	Tfb2m	0	181113575	181113900	181113712	39	370	27.4
1	182757975	182764950	1	chr1_182757975	Lefty1	0	182761350	182761800	182761537	248	2394	104.2
1	183938000	183943550	1	chr1_183938000	Srp9	0	183939400	183939500	183939437	21	79	14.1
1	183998825	184000025	1	chr1_183998825	Srp9	0	183999650	184000050	183999837	86	890	83
1	185719650	185721825	1	chr1_185719650	Dusp10	0	185720575	185720775	185720687	18	117	19.6
1	186804725	186807800	1	chr1_186804725	Mark1	0	186805750	186806050	186805912	59	487	56.7
1	186908025	186912075	1	chr1_186908025	Iars2	0	186909450	186909550	186909512	15	55	8.7
1	187936175	187938550	1	chr1_187936175	Lyplal1	0	187937125	187937650	187937637	18	280	55.7
1	188213150	188216875	1	chr1_188213150	Tgfb2	0	188214550	188214950	188214762	63	691	48
1	190693750	190701400	1	chr1_190693750	Ush2a	0	190699550	190699750	190699662	21	139	14
1	190712775	190715400	1	chr1_190712775	Kctd3	0	190714200	190714450	190714337	53	424	61.9
1	191616525	191618900	1	chr1_191616525	Ptpn14	0	191617175	191617575	191617337	89	895	64
1	193316200	193317325	1	chr1_193316200	Dtl	0	193316950	193317200	193317062	30	252	30.7
1	193357200	193364525	1	chr1_193357200	Ints7	0	193362450	193362700	193362562	37	275	34.2
1	193628100	193632725	1	chr1_193628100	Slc30a1	0	193631225	193631400	193631362	19	114	11.7
1	194149700	194152650	1	chr1_194149700	Hhat	0	194150625	194150650	194150637	13	13	2.1
1	194154225	194156925	1	chr1_194154225	Kcnh1	0	194155650	194156000	194155837	72	663	44.3
1	194215375	194218850	1	chr1_194215375	Kcnh1	0	194216150	194216375	194216287	26	188	24.2
1	195204375	195206325	1	chr1_195204375	mmu-mir-205	0	195205425	195205675	195205562	27	237	37.3
1	195238150	195243675	1	chr1_195238150	3	0	195239625	195239650	195239637	15	15	2.9
1	196446500	196449200	1	chr1_196446500	Cd34	0	196447400	196447650	196447537	25	199	19.7
3	7562050	7563050	1	chr3_7562050	3110050N22Rik	0	7562650	7563025	7562812	44	467	33.1
3	7989600	7991350	1	chr3_7989600	Il7	0	7989875	7989900	7989887	13	13	1.1
3	8968725	8979575	1	chr3_8968725	Tpd52	0	8971550	8971850	8971712	43	376	26.3
3	9080925	9086350	1	chr3_9080925	Tpd52	0	9081600	9081775	9081687	19	123	17.9
3	9596800	9600475	1	chr3_9596800	Zfp704	0	9597850	9597900	9597862	13	26	3.1
3	11195300	11197025	1	chr3_11195300	Snx16	0	11196650	11196850	11196712	24	174	16.3
3	19898275	19900200	1	chr3_19898275	Crh	0	19900050	19900075	19900062	13	13	0.8
3	20214975	20216700	1	chr3_20214975	Cp	0	20215850	20216375	20216187	38	585	55.4
3	22082625	22084875	1	chr3_22082625	Tbl1xr1	0	22083275	22083550	22083412	78	644	35.3
3	22153350	22156200	1	chr3_22153350	Tbl1xr1	0	22154725	22155100	22154912	52	551	60.1
3	22214075	22216200	1	chr3_22214075	Tbl1xr1	0	22215375	22215450	22215387	14	42	7.3
3	22229075	22231575	1	chr3_22229075	Tbl1xr1	0	22228975	22229350	22229162	25	299	35.6
3	22310875	22317950	1	chr3_22310875	Agtr1b	0	22312975	22313200	22313087	32	234	15.2
3	22344425	22348175	1	chr3_22344425	Agtr1b	0	22347500	22347925	22347687	45	478	32.7
3	27254275	27256900	1	chr3_27254275	Ect2	0	27254950	27255100	27255062	32	165	25.8
3	27786900	27790450	1	chr3_27786900	Ghsr	0	27787800	27788075	27787912	41	337	24.4
3	27893750	27896725	1	chr3_27893750	Pld1	0	27894825	27894850	27894837	17	17	3.1
3	28228100	28229375	1	chr3_28228100	Fndc3b	0	28229200	28229500	28229337	38	342	40.1
3	29032000	29035600	1	chr3_29032000	Rpl22l1	0	29034825	29034850	29034837	13	13	2.2
3	30912625	30914900	1	chr3_30912625	Samd7	0	30914900	30915650	30915462	82	1126	118.1
3	30915175	30916225	1	chr3_30915175	Samd7	0	30914900	30915650	30915462	82	1126	118.1
3	32948500	32951375	1	chr3_32948500	Ndufb5	0	32950800	32951025	32950912	48	334	37.8
3	33024175	33026250	1	chr3_33024175	Ndufb5	0	33025550	33025625	33025562	17	50	9.4
3	34179625	34183975	1	chr3_34179625	Fxr1h	0	34182100	34182450	34182237	28	306	48
3	34196875	34201525	1	chr3_34196875	Fxr1h	0	34199175	34199475	34199337	61	527	37.6
3	34859700	34864800	1	chr3_34859700	Sox2	0	34860000	34860325	34860162	76	661	58.8
3	34935125	34939725	1	chr3_34935125	Sox2	0	34936800	34937125	34936937	44	415	53.3
3	35909275	35918525	1	chr3_35909275	Atp11b	0	35915175	35915575	35915337	44	473	48.6
3	36696600	36697950	1	chr3_36696600	Anxa5	0	36697325	36697600	36697462	34	270	23.2
3	37322225	37323475	1	chr3_37322225	Il2	0	37322000	37322225	37322112	22	163	13
3	38759900	38761700	1	chr3_38759900	Ankrd50	0	38760200	38760250	38760212	13	26	4.3
3	40632925	40634025	1	chr3_40632925	Intu	0	40633100	40633200	40633112	16	59	11
3	40646925	40647975	1	chr3_40646925	Intu	0	40647600	40647975	40647787	55	512	46.2
3	41195225	41197250	1	chr3_41195225	1700108L22Rik	0	41196175	41196550	41196362	105	986	57.8
3	51214175	51218325	1	chr3_51214175	Ccrn4l	0	51216475	51216625	51216587	25	140	23.3
3	52341325	52343650	1	chr3_52341325	Foxo1	0	52342075	52342375	52342237	85	756	74.3
3	52500225	52502675	1	chr3_52500225	Foxo1	0	52501425	52501500	52501487	23	64	11.5
3	53541750	53546550	1	chr3_53541750	8030451K01Rik	0	53545650	53546025	53545837	49	501	45.1
3	53648550	53650800	1	chr3_53648550	Stoml3	0	53649750	53649950	53649862	23	157	20.2
3	53686100	53686775	1	chr3_53686100	Frem2	0	53686475	53686675	53686487	14	105	14.8
3	54974400	54974650	1	chr3_54974400	6030405A18Rik	0	54974450	54974700	54974537	39	306	17.9
3	55076575	55079500	1	chr3_55076575	Ccna1	0	55077875	55078325	55078112	107	1109	54
3	57646500	57647950	1	chr3_57646500	Commd2	0	57646850	57647025	57646862	23	149	20.7
3	65735425	65736975	1	chr3_65735425	EG624866	0	65736800	65737075	65736962	41	344	44.1
3	65737150	65739325	1	chr3_65737150	EG624866	0	65738350	65738725	65738562	35	402	47.9
3	65744125	65745300	1	chr3_65744125	EG624866	0	65745100	65745650	65745412	138	1614	65.1
3	67590175	67592200	1	chr3_67590175	Gfm1	0	67591975	67592125	67592087	21	115	19
3	68575525	68576525	1	chr3_68575525	Schip1	0	68576275	68576475	68576362	20	128	15.9
3	68650750	68657100	1	chr3_68650750	Schip1	0	68652850	68653325	68653037	44	578	66.2
3	79302275	79309900	1	chr3_79302275	Rapgef2	0	79304350	79304775	79304612	75	777	52.2
3	81186825	81189925	1	chr3_81186825	Glrb	0	81188225	81188500	81188337	39	340	39.4
3	83671325	83672450	1	chr3_83671325	Sfrp2	0	83672050	83672250	83672162	30	200	30.2
3	83674825	83676050	1	chr3_83674825	Sfrp2	0	83675100	83675325	83675212	34	255	34.2
3	84028900	84031925	1	chr3_84028900	D930015E06Rik	0	84029750	84030025	84029887	22	204	27.9
3	84064075	84068100	1	chr3_84064075	Mnd1	0	84066125	84066725	84066287	70	1151	101.2
3	84077150	84084500	1	chr3_84077150	Mnd1	0	84080375	84080600	84080437	30	227	30.4
3	84104275	84109800	1	chr3_84104275	Mnd1	0	84106750	84107025	84106837	36	308	41.9
3	84263900	84268125	1	chr3_84263900	Mnd1	0	84267675	84268025	84267837	93	870	59.1
3	84278675	84280350	1	chr3_84278675	Trim2	0	84279775	84280075	84279987	60	530	46.8
3	84458825	84460175	1	chr3_84458825	6330505N24Rik	0	84459925	84460125	84460012	26	157	23.2
3	84723575	84727450	1	chr3_84723575	9930117H01Rik	0	84726025	84726050	84726037	15	15	2.8
3	84738650	84744350	1	chr3_84738650	9930117H01Rik	0	84741150	84741325	84741237	23	144	22.2
3	87716625	87717925	1	chr3_87716625	Arhgef11	0	87717725	87717750	87717737	16	16	2.9
3	87978775	87981250	1	chr3_87978775	Prcc	0	87979500	87979625	87979562	24	104	16.8
3	88251525	88260250	1	chr3_88251525	186	0	88255750	88255900	88255787	17	89	13
3	88361450	88369550	1	chr3_88361450	Cct3	0	88367475	88367675	88367662	17	119	8.9
3	88625525	88627175	1	chr3_88625525	2700083E18Rik	0	88625525	88625550	88625537	21	21	4
3	88731700	88735125	1	chr3_88731700	Rxfp4	0	88732350	88732675	88732537	35	369	34.8
3	90328850	90330175	1	chr3_90328850	Slc39a1	0	90329475	90329575	90329512	32	123	19.6
[truncated: 1,257 more rows]

## Sheet: Sox2 NPC TSS
CHROM	START	STOP	STRAND	ID1	ID2	DISTANCE	REGION START	REGION END	PEAK POS	PEAK HEIGHT	TOTAL TARGET COUNTS	TOTAL BACKGROUND COUNTS
[truncated: 4,638 more rows]

[truncated: 8 more sheets: Sox2 NPC Poised Enhancers, Sox2 NPC Active Enhancers, Brn2 NPC TSS, Brn2 NPC Poised Enhancers, Brn2 NPC Active Enhancers, Oct4 ESC TSS, Oct4 ESC Active Enhancers, Oct4 ESC Poised Enhancers]
