# Supplementary material for: SOX2 Co-Occupies Distal Enhancer Elements with Distinct POU Factors in ESCs and NPCs to Specify Cell State
Source: PLoS Genet. 2013 Feb 21;9(2):e1003288. doi: 10.1371/journal.pgen.1003288 (PMC3578749; doi:10.1371/journal.pgen.1003288)
Supplement: Table S5 — GREAT analysis of SOX2-bound enhancers in ESCs. Full lists of GREAT terms enriched in regions associated with active and poised enhancers occupied by SOX2 in ESCs. (XLSX) [file pgen.1003288.s010.xlsx]

## Sheet: Key
Table S5
Full lists of GREAT terms enriched in regions associated with active and poised enhancers occupied by SOX2 in ESCs.
Complete list of all parent and child terms for bound regions indicated. Generally terminal child term was listed in main figures.
Referred to in Figure 3
Highlighted rows depicted in figure.

## Sheet: SOX2 ESC Poised Enhancers
# Ontology	ID	Desc	BinomRank	BinomP	BinomBonfP	BinomFdrQ	RegionFoldEnrich	ExpRegions	ObsRegions	GenomeFrac	SetCov	HyperRank	HyperP	HyperBonfP	HyperFdrQ	GeneFoldEnrich	ExpGenes	ObsGenes	TotalGenes	GeneSetCov	TermCov	Regions	Genes
GO Molecular Function	GO:0005488	binding	1	1.76283e-30	5.73626e-27	5.73626e-27	1.14285	1540.88	1761	0.733754	0.838571	1	2.89864e-24	9.43217e-21	9.43217e-21	1.15784	1562.4	1809	11144	0.638095	0.162329	region_0,region_1,region_10,region_100,region_1000,region_1001,region_1002,region_1003,region_1007,region_1008,region_1009,region_101,region_1010,region_1011,region_1012,region_1013,region_1014,region_1015,region_1016,region_1017,region_1018,region_1019,region_102,region_1020,region_1021,region_1022,region_1024,region_1025,region_1026,region_1027,region_1028,region_1029,region_103,region_1030,reg…	1110034B05Rik,1700071K01Rik,1700109H08Rik,2310061N02Rik,2510003E04Rik,2610021K21Rik,2610528E23Rik,2700060E02Rik,2810407C02Rik,4831426I19Rik,4921528O07Rik,4930528F23Rik,4930529M08Rik,4930544G11Rik,4931429L15Rik,5033414D02Rik,5430435G22Rik,5730507C01Rik,5730528L13Rik,A930038C07Rik,AK011498,AW146020,AW146154,Aadat,Aak1,Abca13,Abca4,Abcb5,Abcc2,Abcc4,Abcg8,Abl2,Abra,Acap2,Accn1,Accsl,Aco1,Acsl4,Actbl…
GO Molecular Function	GO:0005515	protein binding	2	2.73536e-18	8.90085e-15	4.45042e-15	1.20619	961.709	1160	0.457956	0.552381	2	1.77196e-22	5.76595e-19	2.88298e-19	1.28434	763.814	981	5448	0.346032	0.180066	region_0,region_10,region_100,region_1000,region_1001,region_1002,region_1003,region_1007,region_1008,region_1009,region_101,region_1010,region_1011,region_1012,region_1013,region_1014,region_1015,region_1016,region_1017,region_1018,region_1019,region_102,region_1020,region_1021,region_1022,region_1025,region_1026,region_1027,region_1028,region_1029,region_103,region_1030,region_1031,region_1033,…	1110034B05Rik,1700071K01Rik,2310061N02Rik,2510003E04Rik,2700060E02Rik,4831426I19Rik,5033414D02Rik,5730528L13Rik,Aadat,Aak1,Abcc2,Abcg8,Abra,Accn1,Actg1,Actn4,Actr2,Acvr1,Adam12,Adam19,Adam9,Adc,Adcy1,Adcy3,Adcy5,Adcyap1,Add3,Adm,Adnp,Adra2a,Adrb3,Agl,Agtpbp1,Ahcyl1,Ahi1,Aim2,Akap1,Akap11,Akap2,Akap7,Akt2,Aldh1a3,Anapc1,Anapc4,Angpt1,Angptl2,Angptl3,Ank2,Ank3,Anxa2,Ap3b1,Apba2,Apbb2,Arfip1,Arhgap1…
GO Molecular Function	GO:0003677	DNA binding	3	4.49186e-18	1.46165e-14	4.87217e-15	1.42781	367.696	525	0.175093	0.25	7	2.47365e-11	8.04927e-08	1.1499e-08	1.37474	262.596	361	1873	0.127337	0.192739	region_1007,region_1008,region_1009,region_1010,region_1011,region_1012,region_1013,region_1014,region_1015,region_1016,region_1018,region_1021,region_1025,region_1033,region_1034,region_1036,region_1045,region_1046,region_1053,region_1059,region_1060,region_107,region_1070,region_1073,region_108,region_1082,region_1083,region_1089,region_109,region_1090,region_1093,region_1098,region_1099,region…	1700071K01Rik,AW146020,Adnp,Aff3,Ahctf1,Aim2,Ankrd33b,Arid1b,Arid2,Arid4b,Arid5b,Arntl,Atf6,Atoh1,Atoh7,Bach2,Bahcc1,Banf2,Barx2,Baz2b,Bbx,Bcl2,Bclaf1,Bcor,Bhlha15,Bhlhe23,Bhlhe40,Brca1,Btaf1,Btbd11,C130039O16Rik,C1d,Cacna1a,Carhsp1,Casz1,Cggbp1,Chd1,Chd1l,Chd2,Chd6,Chd7,Chd9,Chrac1,Clock,Creb1,Creb3l2,Crebl2,Csrnp1,Ctnnb1,Cux1,Cxxc4,D1Pas1,Dbx1,Ddx1,Ddx11,Ddx58,Dlx2,Dmbx1,Dmrt1,Dmrt2,Dmrta2,Duxb…
GO Molecular Function	GO:0003676	nucleic acid binding	4	2.33458e-15	7.59672e-12	1.89918e-12	1.30683	522.639	683	0.248876	0.325238	28	1.81959e-05	0.0592094	0.00211462	1.17305	434.763	510	3101	0.179894	0.164463	region_1007,region_1008,region_1009,region_1010,region_1011,region_1012,region_1013,region_1014,region_1015,region_1016,region_1018,region_1021,region_1025,region_1033,region_1034,region_1036,region_1037,region_1045,region_1046,region_1047,region_1048,region_1049,region_1050,region_1053,region_1059,region_1060,region_107,region_1070,region_1073,region_1074,region_108,region_1082,region_1083,regio…	1110034B05Rik,1700071K01Rik,2610528E23Rik,5730507C01Rik,AK011498,AW146020,AW146154,Aco1,Adad2,Adat1,Adnp,Aen,Aff3,Ahctf1,Aim2,Akap1,Ankhd1,Ankrd33b,Arid1b,Arid2,Arid4b,Arid5b,Arntl,Arpp21,Atf6,Atoh1,Atoh7,Atxn1,Auh,Bach2,Bahcc1,Banf2,Bard1,Barx2,Baz2b,Bbx,Bcl2,Bclaf1,Bcor,Bhlha15,Bhlhe23,Bhlhe40,Bicc1,Brca1,Btaf1,Btbd11,C130039O16Rik,C1d,Cacna1a,Caprin2,Carhsp1,Casz1,Celf4,Cggbp1,Chd1,Chd1l,Chd2,…
GO Molecular Function	GO:0003824	catalytic activity	5	9.94363e-15	3.23566e-11	6.47131e-12	1.21508	803.241	976	0.382496	0.464762	38	5.56503e-05	0.181086	0.00476543	1.11332	755.402	841	5388	0.296649	0.156088	region_0,region_1,region_10,region_100,region_1000,region_1001,region_1002,region_1019,region_102,region_1021,region_1023,region_1026,region_1029,region_1030,region_1035,region_1036,region_1037,region_1039,region_1040,region_1041,region_1042,region_1043,region_1044,region_1045,region_1046,region_105,region_1051,region_1054,region_1055,region_1056,region_1057,region_1060,region_1061,region_1062,re…	1110002B05Rik,1110020G09Rik,1110034B05Rik,1700106N22Rik,1810063B05Rik,2310030N02Rik,2610528E23Rik,4833442J19Rik,4931429L15Rik,6430598A04Rik,9630033F20Rik,A4galt,AI480653,Aadat,Aak1,Abca13,Abca4,Abcb5,Abcc2,Abcc4,Abcg8,Abl2,Accsl,Acer2,Aco1,Acpl2,Acsl4,Acvr1,Adad2,Adam12,Adam19,Adam32,Adam9,Adamts16,Adamts18,Adamts9,Adamtsl1,Adat1,Adc,Adcy1,Adcy3,Adcy5,Adcy8,Adnp,Adsl,Aen,Agl,Agpat3,Agpat4,Agtpbp1…
GO Molecular Function	GO:0046914	transition metal ion binding	6	1.61995e-08	5.27131e-05	8.78551e-06	1.27339	363.596	463	0.173141	0.220476	49	0.000467253	1	0.0310294	1.17212	300.31	352	2142	0.124162	0.164332	region_0,region_1000,region_1001,region_1002,region_1008,region_1009,region_1010,region_1011,region_1012,region_1013,region_1014,region_1015,region_1016,region_102,region_1020,region_1021,region_1026,region_1038,region_1053,region_1059,region_1060,region_1066,region_1070,region_1081,region_1107,region_1108,region_1116,region_1117,region_1120,region_1123,region_1126,region_1147,region_1148,region_…	1110034B05Rik,5730507C01Rik,AK011498,AW146154,Abl2,Acap2,Adam12,Adam19,Adam32,Adam9,Adamts16,Adamts18,Adamts9,Adamtsl1,Adnp,Agfg2,Agtpbp1,Alkbh3,Anpep,Aox3,Aox4,Arfgap3,Arg1,Arid2,Arih1,Asap1,Bard1,Baz2b,Brca1,C130039O16Rik,Car1,Car12,Car13,Car2,Car5a,Car8,Casz1,Cda,Chordc1,Coq7,Cpa6,Cpe,Cryz,Csrp1,Csrp2,Cxxc4,Cyb5b,Cycs,Cyp19a1,Cyp1b1,Cyp26a1,Cyp26b1,Cyp2c44,Cyp2c70,Cyp2u1,Cyp39a1,Cyp46a1,Cyp51,…
GO Molecular Function	GO:0003700	sequence-specific DNA binding transcription factor activity	7	9.97715e-08	0.000324657	4.63795e-05	1.35882	209.742	285	0.0998769	0.135714	3	8.27559e-14	2.69288e-10	8.97625e-11	1.67117	116.086	194	828	0.0684303	0.234299	region_1007,region_1008,region_1009,region_1010,region_1011,region_1025,region_1033,region_1034,region_1036,region_1045,region_1046,region_1059,region_1060,region_107,region_108,region_1089,region_109,region_1090,region_1093,region_110,region_1101,region_1105,region_1106,region_1116,region_1117,region_1118,region_1141,region_1170,region_1171,region_1172,region_1173,region_1189,region_1193,region_…	AW146020,Adnp,Aff1,Aff3,Ahctf1,Arntl,Atf6,Bach2,Barx2,Cited2,Clock,Creb1,Creb3l2,Crebl2,Csrnp1,Ctnnb1,Cux1,Dbx1,Dlx2,Dmbx1,Duxbl,E2f3,E2f8,Ebf1,Egr2,Ehf,Elf5,Elk3,Emx1,Emx2,En2,Eomes,Epas1,Esr2,Esrrb,Esrrg,Etv1,Etv5,Etv6,Evx1,Fbxw7,Fli1,Foxb1,Foxc1,Foxd1,Foxd2,Foxd3,Foxi1,Foxi3,Foxj3,Foxk1,Foxn2,Foxn3,Foxo1,Foxo6,Foxp1,Gata3,Gata5,Gata6,Gbx2,Gcfc1,Glis3,Glis3,Gpbp1,Grhl2,Hdac2,Hes1,Hif1a,Hinfp,Hl…
GO Molecular Function	GO:0043167	ion binding	8	1.21029e-07	0.000393828	4.92285e-05	1.1679	667.864	780	0.31803	0.371429	21	4.14333e-06	0.0134824	0.000642019	1.16626	525.613	613	3749	0.216226	0.16351	region_0,region_1,region_100,region_1000,region_1001,region_1002,region_1008,region_1009,region_101,region_1010,region_1011,region_1012,region_1013,region_1014,region_1015,region_1016,region_1019,region_102,region_1020,region_1021,region_1026,region_1038,region_1053,region_1059,region_1060,region_1065,region_1066,region_1069,region_1070,region_1071,region_1072,region_1073,region_1078,region_1081,…	1110034B05Rik,1700109H08Rik,2610021K21Rik,4930528F23Rik,5730507C01Rik,AK011498,AW146154,Abl2,Acap2,Aco1,Actn4,Acvr1,Adam12,Adam19,Adam32,Adam9,Adamts16,Adamts18,Adamts9,Adamtsl1,Adat1,Adcy1,Adcy3,Adcy5,Adcy8,Add3,Adnp,Agfg2,Agl,Agtpbp1,Alkbh3,Ampd3,Anpep,Anxa2,Anxa3,Aox3,Aox4,Arfgap3,Arg1,Arhgap29,Arid2,Arih1,Armc1,Arsj,Asap1,Asxl1,Atp10a,Atp10d,Atp11b,Atp12a,Atp8a1,B230120H23Rik,B4galt1,Bard1,Ba…
GO Molecular Function	GO:0043169	cation binding	9	1.24717e-07	0.000405829	4.50921e-05	1.16806	666.059	778	0.317171	0.370476	22	4.83857e-06	0.0157447	0.000715668	1.16525	524.351	611	3740	0.21552	0.163369	region_0,region_1,region_100,region_1000,region_1001,region_1002,region_1008,region_1009,region_101,region_1010,region_1011,region_1012,region_1013,region_1014,region_1015,region_1016,region_1019,region_102,region_1020,region_1021,region_1026,region_1038,region_1053,region_1059,region_1060,region_1065,region_1066,region_1069,region_1070,region_1071,region_1072,region_1073,region_1078,region_1081,…	1110034B05Rik,1700109H08Rik,2610021K21Rik,4930528F23Rik,5730507C01Rik,AK011498,AW146154,Abl2,Acap2,Aco1,Actn4,Acvr1,Adam12,Adam19,Adam32,Adam9,Adamts16,Adamts18,Adamts9,Adamtsl1,Adat1,Adcy1,Adcy3,Adcy5,Adcy8,Add3,Adnp,Agfg2,Agl,Agtpbp1,Alkbh3,Ampd3,Anpep,Anxa2,Anxa3,Aox3,Aox4,Arfgap3,Arg1,Arhgap29,Arid2,Arih1,Armc1,Arsj,Asap1,Asxl1,Atp10a,Atp10d,Atp11b,Atp12a,Atp8a1,B230120H23Rik,B4galt1,Bard1,Ba…
GO Molecular Function	GO:0046872	metal ion binding	10	1.34133e-07	0.000436468	4.36468e-05	1.16904	658.658	770	0.313647	0.366667	23	5.01778e-06	0.0163278	0.000709906	1.16624	517.902	604	3694	0.213051	0.163508	region_0,region_1,region_100,region_1000,region_1001,region_1002,region_1008,region_1009,region_101,region_1010,region_1011,region_1012,region_1013,region_1014,region_1015,region_1016,region_1019,region_102,region_1020,region_1021,region_1026,region_1038,region_1053,region_1059,region_1060,region_1065,region_1066,region_1069,region_1070,region_1071,region_1072,region_1073,region_1078,region_1081,…	1110034B05Rik,1700109H08Rik,2610021K21Rik,4930528F23Rik,5730507C01Rik,AK011498,AW146154,Abl2,Acap2,Aco1,Actn4,Acvr1,Adam12,Adam19,Adam32,Adam9,Adamts16,Adamts18,Adamts9,Adamtsl1,Adat1,Adcy1,Adcy3,Adcy5,Adcy8,Add3,Adnp,Agfg2,Agtpbp1,Alkbh3,Ampd3,Anpep,Anxa2,Anxa3,Aox3,Aox4,Arfgap3,Arg1,Arhgap29,Arid2,Arih1,Armc1,Arsj,Asap1,Asxl1,Atp10a,Atp10d,Atp11b,Atp12a,Atp8a1,B230120H23Rik,B4galt1,Bard1,Baz2b,…
GO Molecular Function	GO:0001071	nucleic acid binding transcription factor activity	11	1.80771e-07	0.000588228	5.34752e-05	1.34939	211.207	285	0.100575	0.135714	4	1.05559e-13	3.43491e-10	8.58727e-11	1.66714	116.367	194	830	0.0684303	0.233735	region_1007,region_1008,region_1009,region_1010,region_1011,region_1025,region_1033,region_1034,region_1036,region_1045,region_1046,region_1059,region_1060,region_107,region_108,region_1089,region_109,region_1090,region_1093,region_110,region_1101,region_1105,region_1106,region_1116,region_1117,region_1118,region_1141,region_1170,region_1171,region_1172,region_1173,region_1189,region_1193,region_…	AW146020,Adnp,Aff1,Aff3,Ahctf1,Arntl,Atf6,Bach2,Barx2,Cited2,Clock,Creb1,Creb3l2,Crebl2,Csrnp1,Ctnnb1,Cux1,Dbx1,Dlx2,Dmbx1,Duxbl,E2f3,E2f8,Ebf1,Egr2,Ehf,Elf5,Elk3,Emx1,Emx2,En2,Eomes,Epas1,Esr2,Esrrb,Esrrg,Etv1,Etv5,Etv6,Evx1,Fbxw7,Fli1,Foxb1,Foxc1,Foxd1,Foxd2,Foxd3,Foxi1,Foxi3,Foxj3,Foxk1,Foxn2,Foxn3,Foxo1,Foxo6,Foxp1,Gata3,Gata5,Gata6,Gbx2,Gcfc1,Glis3,Glis3,Gpbp1,Grhl2,Hdac2,Hes1,Hif1a,Hinfp,Hl…
GO Molecular Function	GO:0044212	transcription regulatory region DNA binding	12	2.33859e-07	0.000760978	6.34148e-05	1.60749	79.0049	127	0.0376214	0.0604762	5	2.74387e-12	8.92856e-09	1.78571e-09	2.16621	37.8542	82	270	0.0289242	0.303704	region_1025,region_1045,region_1046,region_107,region_108,region_109,region_110,region_1123,region_1170,region_1171,region_1172,region_1173,region_118,region_119,region_1215,region_1223,region_1245,region_1246,region_1247,region_1255,region_1256,region_1316,region_1317,region_1318,region_1331,region_1332,region_1349,region_1360,region_1398,region_1409,region_1425,region_1426,region_1466,region_14…	1700071K01Rik,Arid5b,Barx2,Bcor,Brca1,Creb3l2,Ctnnb1,Dbx1,Dlx2,Egr2,Elk3,Emx2,Esrrb,Etv5,Ezh2,Fezf1,Fezf2,Fli1,Foxc1,Foxd3,Foxi1,Gata3,Gata5,Gata6,Hes1,Hif1a,Hinfp,Hlx,Hnf1b,Kdm1a,Lef1,Lmo4,Mzf1,Nanogpd,Ncor1,Neurod1,Neurog1,Nkx2-2,Nr5a2,Pax6,Pax8,Phox2b,Pou4f2,Prdm5,Prox1,Rcor1,Rest,Rfx3,Rptor,Sall1,Smad3,Smad6,Smarca2,Sox11,Sox2,Sox4,Sox5,Sox6,Sox7,Sox9,Tbl1x,Tbl1xr1,Tbx18,Tbx20,Tcf12,Tcf4,Tcf7…
GO Molecular Function	GO:0030742	GTP-dependent protein binding	13	3.08002e-07	0.00100224	7.70953e-05	5.31194	2.82382	15	0.00134468	0.00714286	266	0.0562068	1	0.687582	2.59368	1.54221	4	11	0.00141094	0.363636	region_2064,region_2065,region_221,region_222,region_223,region_224,region_225,region_226,region_227,region_228,region_252,region_447,region_448,region_449,region_450	Eea1,Mras,Rab5b,Rapgef5
GO Molecular Function	GO:0019901	protein kinase binding	14	4.79794e-07	0.00156125	0.000111518	1.69518	58.9908	100	0.0280908	0.0476191	29	2.15502e-05	0.0701244	0.00241808	1.67047	37.714	63	269	0.0222222	0.234201	region_103,region_1030,region_104,region_105,region_1058,region_1059,region_107,region_108,region_109,region_110,region_1119,region_1159,region_118,region_119,region_120,region_1262,region_1263,region_1264,region_1275,region_1294,region_1353,region_1391,region_1415,region_1416,region_1450,region_1451,region_1452,region_1453,region_1454,region_149,region_150,region_151,region_152,region_1529,regio…	Actg1,Adam9,Add3,Adra2a,Akap1,Akap11,Akap7,Akt2,Axin2,Cabyr,Ccdc88a,Ccnd2,Ccnh,Ccnl1,Ccnt2,Ccnyl1,Cdh2,Chrna7,Ctnnb1,Dlg1,Elp2,Faf1,Fam58b,Fert2,Fgr,Foxo1,Foxo6,Gata6,Ghr,Grin2a,Jak2,Ksr1,Maml1,Map2k6,Msh2,Pak1,Pard3,Park2,Pik3r1,Pja2,Plcb4,Ppp1cb,Prkab2,Prkce,Ptk2,Ptk2b,Rab11fip2,Rb1cc1,Rps6ka4,Rptor,Sik1,Sirt1,Skap1,Smad3,Sox9,Stk39,Sykb,Thy1,Traf3,Traf6,Trib1,Trpv4,Vim
GO Molecular Function	GO:0000166	nucleotide binding	15	4.82275e-07	0.00156932	0.000104622	1.22724	400.083	491	0.190516	0.23381	47	0.000371882	1	0.0257469	1.16367	338.585	394	2415	0.138977	0.163147	region_0,region_100,region_1000,region_1001,region_1002,region_1003,region_1019,region_102,region_1037,region_1040,region_105,region_1074,region_1084,region_1088,region_1094,region_1098,region_1099,region_1100,region_1101,region_1108,region_1110,region_1111,region_1122,region_1123,region_113,region_1131,region_1135,region_1138,region_1139,region_114,region_1140,region_1143,region_1154,region_1159…	2610528E23Rik,4930529M08Rik,4930544G11Rik,5430435G22Rik,Aak1,Abca13,Abca4,Abcb5,Abcc2,Abcc4,Abcg8,Abl2,Acsl4,Actbl2,Actg1,Actr2,Acvr1,Adcy1,Adcy3,Adcy5,Adcy8,Akap7,Akt2,Aldh1a3,Aldh5a1,Aox3,Aox4,Arf1,Arfrp1,Arhgap5,Arl15,Arl4a,Arl4c,Arl8b,Asns,Ass1,Atad2b,Atl1,Atl2,Atp10a,Atp10d,Atp11b,Atp12a,Atp8a1,B230120H23Rik,Bbs10,Bdh1,Bmp2k,Bmpr2,Btaf1,Cacna1b,Camk1d,Camk1g,Camk2d,Cct6b,Cdc7,Cdk13,Cdk15,Cdk…
GO Molecular Function	GO:0000975	regulatory region DNA binding	16	4.96307e-07	0.00161498	0.000100936	1.58386	80.1841	127	0.0381829	0.0604762	6	1.79394e-11	5.83747e-08	9.72911e-09	2.09633	39.116	82	279	0.0289242	0.293907	region_1025,region_1045,region_1046,region_107,region_108,region_109,region_110,region_1123,region_1170,region_1171,region_1172,region_1173,region_118,region_119,region_1215,region_1223,region_1245,region_1246,region_1247,region_1255,region_1256,region_1316,region_1317,region_1318,region_1331,region_1332,region_1349,region_1360,region_1398,region_1409,region_1425,region_1426,region_1466,region_14…	1700071K01Rik,Arid5b,Barx2,Bcor,Brca1,Creb3l2,Ctnnb1,Dbx1,Dlx2,Egr2,Elk3,Emx2,Esrrb,Etv5,Ezh2,Fezf1,Fezf2,Fli1,Foxc1,Foxd3,Foxi1,Gata3,Gata5,Gata6,Hes1,Hif1a,Hinfp,Hlx,Hnf1b,Kdm1a,Lef1,Lmo4,Mzf1,Nanogpd,Ncor1,Neurod1,Neurog1,Nkx2-2,Nr5a2,Pax6,Pax8,Phox2b,Pou4f2,Prdm5,Prox1,Rcor1,Rest,Rfx3,Rptor,Sall1,Smad3,Smad6,Smarca2,Sox11,Sox2,Sox4,Sox5,Sox6,Sox7,Sox9,Tbl1x,Tbl1xr1,Tbx18,Tbx20,Tcf12,Tcf4,Tcf7…
GO Molecular Function	GO:0019900	kinase binding	17	6.32233e-07	0.00205729	0.000121017	1.64716	65.5673	108	0.0312225	0.0514286	34	3.13858e-05	0.102129	0.0030038	1.60542	43.6024	70	311	0.0246914	0.22508	region_103,region_1030,region_104,region_105,region_1058,region_1059,region_107,region_108,region_109,region_110,region_1119,region_1159,region_118,region_119,region_120,region_1262,region_1263,region_1264,region_1275,region_1294,region_1298,region_1353,region_138,region_1391,region_1415,region_1416,region_1438,region_1450,region_1451,region_1452,region_1453,region_1454,region_149,region_150,regi…	Actg1,Adam9,Add3,Adra2a,Akap1,Akap11,Akap7,Akt2,Axin2,Cabyr,Calm2,Ccdc88a,Ccnd2,Ccnh,Ccnl1,Ccnt2,Ccnyl1,Cdh2,Chrna7,Ctnnb1,Dlg1,Elp2,Faf1,Fam58b,Fert2,Fgr,Foxo1,Foxo6,Gata6,Ghr,Grin2a,Igf1r,Jak2,Ksr1,Maml1,Map2k6,Msh2,Pak1,Pard3,Park2,Pdgfra,Pik3r1,Pja2,Plcb4,Ppp1cb,Prkab2,Prkce,Ptk2,Ptk2b,Ptpn22,Rab11fip2,Rb1cc1,Rps6ka4,Rptor,Sik1,Sirt1,Skap1,Smad3,Sox9,Stk39,Sykb,Tax1bp1,Thy1,Tnfaip3,Traf3,Traf…
GO Molecular Function	GO:0008270	zinc ion binding	18	7.34051e-07	0.0023886	0.0001327	1.25675	320.669	403	0.152699	0.191905	63	0.00154518	1	0.07981	1.16909	254.044	297	1812	0.104762	0.163907	region_0,region_1000,region_1001,region_1002,region_1008,region_1009,region_1010,region_1011,region_1012,region_1013,region_1014,region_1015,region_1016,region_102,region_1020,region_1021,region_1038,region_1053,region_1059,region_1060,region_1066,region_1070,region_1081,region_1116,region_1117,region_1120,region_1123,region_1126,region_1149,region_1169,region_117,region_1170,region_1171,region_1…	5730507C01Rik,AK011498,AW146154,Acap2,Adam12,Adam19,Adam32,Adam9,Adamts16,Adamts18,Adamts9,Adamtsl1,Adnp,Agfg2,Agtpbp1,Anpep,Arfgap3,Arid2,Arih1,Asap1,Bard1,Baz2b,Brca1,C130039O16Rik,Car1,Car12,Car13,Car2,Car5a,Car8,Casz1,Cda,Chordc1,Cpa6,Cpe,Cryz,Csrp1,Csrp2,Cxxc4,Dctd,Ddx58,Dpys,Eea1,Egr2,Ehmt1,Enpep,Esr2,Esrrb,Esrrg,Fancl,Fbxo30,Fezf1,Fezf2,Foxp1,Gata3,Gata5,Gata6,Gda,Glis3,Gm3604,Grin2a,Grin2…
GO Molecular Function	GO:0019899	enzyme binding	19	8.86873e-07	0.00288588	0.000151889	1.37482	167.294	230	0.0796639	0.109524	11	1.20408e-07	0.000391807	3.56188e-05	1.469	113.002	166	806	0.0585538	0.205955	region_100,region_102,region_1021,region_1026,region_103,region_1030,region_104,region_105,region_1058,region_1059,region_107,region_108,region_109,region_110,region_1114,region_1119,region_1132,region_1142,region_1150,region_1151,region_1152,region_1159,region_1174,region_1177,region_118,region_119,region_1195,region_1196,region_120,region_1223,region_1262,region_1263,region_1264,region_1275,reg…	1700071K01Rik,Actg1,Adam9,Add3,Adra2a,Akap1,Akap11,Akap7,Akt2,Anapc4,Anxa2,Ap3b1,Apbb2,Arih1,Atp6v0c,Atp6v1g3,Axin2,Bcl2,Bcor,Bdkrb2,Brca1,Btg1,Cabyr,Calm2,Ccdc88a,Ccnd2,Ccnh,Ccnl1,Ccnt2,Ccnyl1,Cd28,Cdh2,Cftr,Chrna7,Cradd,Ctnnb1,Cul3,Cul4b,Cul5,D7Ertd443e,Daam1,Dgki,Dlg1,Dock1,Dock2,Dock4,Dock5,Dock7,Egr2,Elp2,Epas1,Esr2,Exoc2,F3,Faf1,Fam58b,Fert2,Fgr,Fmnl2,Foxo1,Foxo6,Gata6,Ghr,Gnb3,Grin2a,Grin3…
GO Molecular Function	GO:0016740	transferase activity	20	1.13711e-06	0.00370015	0.000185007	1.25483	314.784	395	0.149897	0.188095	27	9.90718e-06	0.032238	0.001194	1.24632	251.941	314	1797	0.110758	0.174736	region_0,region_102,region_1023,region_1030,region_1035,region_1036,region_1040,region_1042,region_1043,region_1044,region_1045,region_1046,region_105,region_1051,region_1060,region_1061,region_1062,region_1063,region_107,region_1070,region_1079,region_108,region_1082,region_1083,region_1089,region_109,region_110,region_1110,region_1111,region_1116,region_1118,region_1121,region_1131,region_1134,…	1110002B05Rik,1110020G09Rik,1700106N22Rik,2310030N02Rik,4833442J19Rik,6430598A04Rik,A4galt,AI480653,Aadat,Aak1,Abl2,Accsl,Acvr1,Adnp,Agl,Agpat3,Agpat4,Akap1,Akap2,Akap7,Akt2,Aldh1l1,Alg10b,Alg6,Atic,B230120H23Rik,B3galt1,B3gnt2,B3gnt7,B4galnt3,B4galnt4,B4galt1,Bcat1,Bmp2k,Bmpr2,C1galt1,C85492,Camk1d,Camk1g,Camk2d,Ccnh,Cdc7,Cdk13,Cdk15,Cdk17,Cdk20,Cdk6,Cdkal1,Cdkl1,Cdkl4,Cds1,Cdyl,Chrac1,Chst15,Ch…
GO Molecular Function	GO:0005545	1-phosphatidylinositol binding	21	1.20004e-06	0.00390492	0.000185949	4.46409	3.58416	16	0.00170674	0.00761905	55	0.000833245	1	0.0492978	3.84065	1.82261	7	13	0.00246914	0.538462	region_1574,region_1723,region_1724,region_1793,region_1860,region_221,region_222,region_223,region_224,region_225,region_226,region_227,region_228,region_621,region_955,region_956	Eea1,Epb4.1,Picalm,Plekha2,Snx10,Snx9,Wdfy3
GO Molecular Function	GO:0042802	identical protein binding	22	2.21346e-06	0.00720261	0.000327391	1.3833	149.642	207	0.0712581	0.0985714	36	4.25206e-05	0.138362	0.00384339	1.36908	104.45	143	745	0.0504409	0.191946	region_1008,region_1009,region_1010,region_1011,region_1045,region_1046,region_106,region_1076,region_1077,region_1085,region_1086,region_1107,region_1114,region_1120,region_1121,region_1150,region_1151,region_1152,region_1154,region_1160,region_1161,region_1162,region_1188,region_120,region_1218,region_1219,region_1226,region_1231,region_1236,region_1237,region_125,region_1251,region_1276,region…	1110034B05Rik,2700060E02Rik,5730528L13Rik,Aadat,Actg1,Actn4,Acvr1,Adra2a,Adrb3,Aldh1a3,Arfip1,Asns,Atic,Atl1,Atl2,Atxn1,B230120H23Rik,B4galt1,Bard1,Bcat1,Bcl2,Bhlha15,Bnip3l,Brca1,Cacybp,Cadm1,Calcoco2,Cbln1,Ccdc88a,Cd28,Cda,Cdh13,Chordc1,Cldn14,Cldn23,Cldn5,Csf1,Dmbx1,Dpyd,Dscaml1,Dst,Dtnbp1,Dynlrb1,E2f8,Eea1,Eed,Enpp1,Ext1,Faah,Fbp1,Fbxo4,Foxp1,Fzd1,Fzd9,Gdf6,Gdnf,Ghr,Grin3a,Hes1,Hmgcr,Hnf1b,Hs…
GO Molecular Function	GO:0035091	phosphatidylinositol binding	23	2.32257e-06	0.00755764	0.000328593	1.99332	27.5922	55	0.0131392	0.0261905	74	0.0026109	1	0.114809	1.69546	17.1045	29	122	0.0102293	0.237705	region_1018,region_1216,region_1217,region_1236,region_1237,region_1250,region_1291,region_1325,region_1406,region_1407,region_1408,region_144,region_1450,region_1451,region_1452,region_1453,region_1460,region_1574,region_1624,region_1625,region_1723,region_1724,region_1728,region_1793,region_1860,region_1965,region_1966,region_1967,region_1968,region_1969,region_1970,region_1991,region_1992,regi…	Anxa2,Arhgap32,Ccdc88a,Clvs1,Col4a3bp,Dapp1,Eea1,Epb4.1,Itpr1,Ldlrap1,Mark1,Pard3,Picalm,Plcb1,Pld1,Plekha2,Sestd1,Sgk1,Snx10,Snx11,Snx14,Snx16,Snx24,Snx27,Snx5,Snx9,Thy1,Twf1,Wdfy3
GO Molecular Function	GO:0051861	glycolipid binding	24	5.4582e-06	0.017761	0.000740041	7.37878	1.21971	9	0.000580816	0.00428571	70	0.00185094	1	0.0860424	3.89052	1.54221	6	11	0.0021164	0.545454	region_1180,region_1181,region_1182,region_1588,region_1753,region_379,region_669,region_670,region_961	Clip3,Gltp,Lama1,Lamb1,Lamc1,Plekha8
GO Molecular Function	GO:0017076	purine nucleotide binding	25	6.52709e-06	0.0212391	0.000849566	1.23436	315.142	389	0.150068	0.185238	72	0.00230778	1	0.104299	1.15797	265.12	307	1891	0.108289	0.162348	region_0,region_100,region_1000,region_1001,region_1002,region_1003,region_1019,region_102,region_1037,region_1040,region_105,region_1084,region_1088,region_1098,region_1099,region_1100,region_1101,region_1110,region_1111,region_1123,region_113,region_1131,region_1138,region_1139,region_1140,region_1143,region_1154,region_1159,region_1160,region_1161,region_1162,region_1163,region_1165,region_116…	2610528E23Rik,4930544G11Rik,5430435G22Rik,Aak1,Abca13,Abca4,Abcb5,Abcc2,Abcc4,Abcg8,Abl2,Acsl4,Actbl2,Actg1,Actr2,Acvr1,Adcy1,Adcy3,Adcy5,Adcy8,Akap7,Akt2,Arf1,Arfrp1,Arhgap5,Arl15,Arl4a,Arl4c,Arl8b,Asns,Ass1,Atad2b,Atl1,Atl2,Atp10a,Atp10d,Atp11b,Atp12a,Atp8a1,B230120H23Rik,Bbs10,Bmp2k,Bmpr2,Btaf1,Cacna1b,Camk1d,Camk1g,Camk2d,Cct6b,Cdc7,Cdk13,Cdk15,Cdk17,Cdk20,Cdk6,Cdkl1,Cdkl4,Cftr,Chd1,Chd1l,Chd…
GO Molecular Function	GO:0042803	protein homodimerization activity	26	7.75461e-06	0.0252335	0.000970519	1.46358	95.6559	140	0.0455504	0.0666667	37	4.42253e-05	0.143909	0.00388943	1.48333	63.3708	94	452	0.033157	0.207965	region_1008,region_1009,region_1010,region_1011,region_1076,region_1077,region_1085,region_1086,region_1107,region_1114,region_1120,region_1121,region_1150,region_1151,region_1152,region_1154,region_1188,region_1218,region_1219,region_1226,region_1231,region_1251,region_1300,region_1303,region_1374,region_1385,region_1415,region_1450,region_1451,region_1452,region_1453,region_1468,region_1469,reg…	1110034B05Rik,Aadat,Actn4,Acvr1,Adra2a,Adrb3,Aldh1a3,Asns,Atic,B4galt1,Bard1,Bcl2,Bhlha15,Bnip3l,Cacybp,Cadm1,Calcoco2,Cbln1,Ccdc88a,Cd28,Cda,Cdh13,Csf1,Dmbx1,Dpyd,Dscaml1,Dst,E2f8,Eea1,Enpp1,Ext1,Faah,Fbxo4,Foxp1,Fzd1,Fzd9,Gdf6,Gdnf,Ghr,Hes1,Hmgcr,Hnf1b,Hsf2,Il17f,Inhbb,Kynu,Lrrk2,Mad2l1,Masp1,Max,Mecom,Msh2,Mtmr2,Mzf1,Nampt,Nod1,Nog,Nr2c1,Nr3c2,Oxa1l,Pdgfra,Plcb1,Pon1,Prkar2a,Ptpre,Pvrl1,Rab11f…
GO Molecular Function	GO:0032555	purine ribonucleotide binding	27	1.1129e-05	0.0362138	0.00134125	1.22826	314.267	386	0.149651	0.183809	80	0.00334897	1	0.136219	1.15152	263.998	304	1883	0.107231	0.161444	region_0,region_100,region_1000,region_1001,region_1002,region_1003,region_1019,region_102,region_1037,region_1040,region_105,region_1084,region_1088,region_1098,region_1099,region_1100,region_1101,region_1110,region_1111,region_1123,region_113,region_1131,region_1138,region_1139,region_1140,region_1143,region_1154,region_1159,region_1160,region_1161,region_1162,region_1163,region_1165,region_116…	2610528E23Rik,4930544G11Rik,5430435G22Rik,Aak1,Abca13,Abca4,Abcb5,Abcc2,Abcc4,Abcg8,Abl2,Acsl4,Actbl2,Actg1,Actr2,Acvr1,Adcy1,Adcy3,Adcy5,Adcy8,Akap7,Akt2,Arf1,Arfrp1,Arhgap5,Arl15,Arl4a,Arl4c,Arl8b,Asns,Ass1,Atad2b,Atl1,Atl2,Atp10a,Atp10d,Atp11b,Atp12a,Atp8a1,B230120H23Rik,Bbs10,Bmp2k,Bmpr2,Btaf1,Cacna1b,Camk1d,Camk1g,Camk2d,Cct6b,Cdc7,Cdk13,Cdk15,Cdk17,Cdk20,Cdk6,Cdkl1,Cdkl4,Cftr,Chd1,Chd1l,Chd…
GO Molecular Function	GO:0019904	protein domain specific binding	28	1.15936e-05	0.0377256	0.00134734	1.3943	122.642	171	0.0584011	0.0814286	9	2.15938e-10	7.02662e-07	7.80735e-08	1.7506	69.119	121	493	0.0426808	0.245436	region_10,region_100,region_1020,region_103,region_1033,region_1034,region_104,region_1070,region_1093,region_11,region_1110,region_1119,region_1131,region_1137,region_1144,region_1150,region_1151,region_1152,region_1155,region_1156,region_1189,region_1195,region_1196,region_1211,region_1212,region_1213,region_1223,region_1233,region_1234,region_1272,region_1282,region_1298,region_1299,region_131…	Adam12,Adam19,Adam9,Akap1,Akap7,Arhgap10,Arhgap26,Arhgap42,Arhgap5,Asap1,Axin2,Baiap2l1,Bcl2,Bok,Cabyr,Cadm1,Calm2,Cftr,Cited2,Clcn3,Cradd,Cttnbp2,Cxxc4,Dab1,Dap,Ddc,Dlgap1,Dlgap2,Dock1,Dock4,Ebf1,Elmo1,Enah,Epb4.1l2,Epb4.1l5,Epha4,Etv6,Evl,Exoc4,Faf1,Foxj3,Fut8,Fzd1,Fzd5,Fzd6,Fzd7,Fzd9,Ghr,Grm7,Homer3,Hoxc4,Id3,Inpp5a,Inpp5d,Jak2,Khdrbs1,Lbr,Lef1,Lnx1,Lphn2,Lrp2,Mrps31,Mtss1,Myo7a,Ncoa2,Ncor1,Nd…
GO Molecular Function	GO:0005546	phosphatidylinositol-4,5-bisphosphate binding	29	1.16173e-05	0.0378026	0.00130354	3.25617	5.83507	19	0.00277861	0.00904762	144	0.0154119	1	0.348267	2.49642	2.80402	7	20	0.00246914	0.35	region_1216,region_1217,region_1406,region_1407,region_1408,region_1450,region_1451,region_1452,region_1453,region_1728,region_1965,region_1966,region_1967,region_1968,region_1969,region_1970,region_2031,region_2032,region_524	Anxa2,Ldlrap1,Mark1,Pard3,Plcb1,Sestd1,Twf1
GO Molecular Function	GO:0032553	ribonucleotide binding	30	1.19987e-05	0.0390436	0.00130145	1.22721	314.536	386	0.149779	0.183809	83	0.00345195	1	0.135333	1.15091	264.138	304	1884	0.107231	0.161359	region_0,region_100,region_1000,region_1001,region_1002,region_1003,region_1019,region_102,region_1037,region_1040,region_105,region_1084,region_1088,region_1098,region_1099,region_1100,region_1101,region_1110,region_1111,region_1123,region_113,region_1131,region_1138,region_1139,region_1140,region_1143,region_1154,region_1159,region_1160,region_1161,region_1162,region_1163,region_1165,region_116…	2610528E23Rik,4930544G11Rik,5430435G22Rik,Aak1,Abca13,Abca4,Abcb5,Abcc2,Abcc4,Abcg8,Abl2,Acsl4,Actbl2,Actg1,Actr2,Acvr1,Adcy1,Adcy3,Adcy5,Adcy8,Akap7,Akt2,Arf1,Arfrp1,Arhgap5,Arl15,Arl4a,Arl4c,Arl8b,Asns,Ass1,Atad2b,Atl1,Atl2,Atp10a,Atp10d,Atp11b,Atp12a,Atp8a1,B230120H23Rik,Bbs10,Bmp2k,Bmpr2,Btaf1,Cacna1b,Camk1d,Camk1g,Camk2d,Cct6b,Cdc7,Cdk13,Cdk15,Cdk17,Cdk20,Cdk6,Cdkl1,Cdkl4,Cftr,Chd1,Chd1l,Chd…
GO Molecular Function	GO:0046983	protein dimerization activity	31	1.21862e-05	0.0396538	0.00127915	1.33923	159.047	213	0.0757366	0.101429	19	2.52972e-06	0.0082317	0.000433248	1.45159	95.7571	139	683	0.04903	0.203514	region_0,region_1008,region_1009,region_1010,region_1011,region_1036,region_1038,region_1045,region_1046,region_1076,region_1077,region_1085,region_1086,region_1107,region_1114,region_1117,region_1118,region_1120,region_1121,region_1144,region_1150,region_1151,region_1152,region_1154,region_1188,region_1194,region_1197,region_1198,region_1216,region_1217,region_1218,region_1219,region_1226,region…	1110034B05Rik,Aadat,Abcg8,Actn4,Acvr1,Adra2a,Adrb3,Aldh1a3,Asns,Atf6,Atic,B4galt1,Bach2,Bard1,Bcl2,Bdkrb2,Bhlha15,Bnip3l,Bok,Cabyr,Cacybp,Cadm1,Calcoco2,Cbln1,Ccdc88a,Cd28,Cda,Cdh13,Creb1,Creb3l2,Crebl2,Csf1,Dmbx1,Dpyd,Dscaml1,Dst,E2f8,Eea1,Enpp1,Epas1,Ext1,Faah,Fbxo4,Foxp1,Fzd1,Fzd9,Gclc,Gdf6,Gdnf,Ghr,Grin2b,Gtf2a1,Hes1,Hgf,Hif1a,Hmgcr,Hnf1b,Hps1,Hsf2,Il12a,Il17f,Inhbb,Kynu,Limk2,Lrrk2,Ltc4s,Mad…
GO Molecular Function	GO:0035326	enhancer binding	32	1.45157e-05	0.047234	0.00147606	2.68192	9.32166	25	0.00443889	0.0119048	18	2.36861e-06	0.00770747	0.000428193	4.27958	2.80402	12	20	0.0042328	0.6	region_1025,region_107,region_108,region_109,region_110,region_1316,region_1317,region_1318,region_1331,region_1332,region_1349,region_1494,region_1501,region_1926,region_1927,region_1995,region_285,region_286,region_373,region_374,region_375,region_376,region_377,region_378,region_423	Esrrb,Fli1,Gata3,Gata5,Lef1,Lmo4,Nanogpd,Sall1,Sox11,Sox9,Tcfap2a,Tcfap2c
GO Molecular Function	GO:0016787	hydrolase activity	33	1.5189e-05	0.049425	0.00149773	1.20601	360.693	435	0.171759	0.207143	912	0.314612	1	1	1.02464	325.967	334	2325	0.117813	0.143656	region_1,region_100,region_1000,region_1001,region_1002,region_1019,region_1026,region_1029,region_1035,region_1036,region_1037,region_1039,region_1040,region_1054,region_1055,region_1056,region_1057,region_1065,region_1066,region_1069,region_1071,region_1072,region_1073,region_1082,region_1087,region_1098,region_1099,region_1100,region_1101,region_1102,region_1121,region_1123,region_1126,region_…	2610528E23Rik,9630033F20Rik,Abca13,Abca4,Abcb5,Abcc2,Abcc4,Abcg8,Acer2,Acpl2,Adad2,Adam12,Adam19,Adam32,Adam9,Adamts16,Adamts18,Adamts9,Adamtsl1,Adat1,Aen,Agl,Agtpbp1,Ahcyl1,Alkbh3,Ampd3,Anpep,Aoah,Arg1,Arhgef10l,Arl4a,Arsj,Asah1,Atad2b,Atf7ip,Atic,Atl1,Atl2,Atp10a,Atp10d,Atp11b,Atp12a,Atp1b3,Atp6v1g3,Atp6v1h,Atp8a1,Bbs4,Bpgm,Btaf1,C330005M16Rik,Ccnh,Cd46,Cda,Cdc25b,Ces5a,Cftr,Cgnl1,Chd1,Chd1l,Ch…
GO Molecular Function	GO:0035639	purine ribonucleoside triphosphate binding	34	1.82765e-05	0.0594716	0.00174916	1.22492	307.776	377	0.14656	0.179524	100	0.00569296	1	0.185249	1.14261	259.932	297	1854	0.104762	0.160194	region_0,region_100,region_1000,region_1001,region_1002,region_1003,region_1019,region_102,region_1037,region_1040,region_105,region_1084,region_1098,region_1099,region_1100,region_1101,region_1110,region_1111,region_1123,region_113,region_1131,region_1138,region_1139,region_1140,region_1143,region_1154,region_1159,region_1160,region_1161,region_1162,region_1163,region_1165,region_1166,region_116…	2610528E23Rik,4930544G11Rik,5430435G22Rik,Aak1,Abca13,Abca4,Abcb5,Abcc2,Abcc4,Abcg8,Abl2,Acsl4,Actbl2,Actg1,Actr2,Acvr1,Adcy1,Adcy3,Adcy5,Adcy8,Akt2,Arf1,Arfrp1,Arhgap5,Arl15,Arl4a,Arl4c,Arl8b,Asns,Ass1,Atad2b,Atl1,Atl2,Atp10a,Atp10d,Atp11b,Atp12a,Atp8a1,B230120H23Rik,Bbs10,Bmp2k,Bmpr2,Btaf1,Cacna1b,Camk1d,Camk1g,Camk2d,Cct6b,Cdc7,Cdk13,Cdk15,Cdk17,Cdk20,Cdk6,Cdkl1,Cdkl4,Cftr,Chd1,Chd1l,Chd2,Chd6…
GO Molecular Function	GO:0008289	lipid binding	35	2.88888e-05	0.0940043	0.00268584	1.4619	84.1369	123	0.0400652	0.0585714	101	0.00585026	1	0.188483	1.31654	60.0059	79	428	0.027866	0.184579	region_1018,region_1170,region_1171,region_1172,region_1173,region_1180,region_1181,region_1182,region_1193,region_1216,region_1217,region_1222,region_1226,region_1236,region_1237,region_1250,region_1281,region_1291,region_1305,region_1306,region_1310,region_1325,region_1373,region_1400,region_1402,region_1406,region_1407,region_1408,region_144,region_1450,region_1451,region_1452,region_1453,regi…	Aldh1a2,Anxa2,Anxa3,Arhgap32,Atp5g3,Bdh1,Cadps,Ccdc88a,Clip3,Clvs1,Col4a3bp,Cyp26a1,Cyp26b1,Dab1,Dapp1,Doc2b,Eea1,Epb4.1,Esr2,Esrrb,Esrrg,F3,Faah,Fert2,Fnbp1l,Gc,Gltp,Hps1,Hsdl2,Itpr1,Lama1,Lamb1,Lamc1,Ldlrap1,Lrat,Ltc4s,Mark1,Mark2,Myof,Nr3c2,Nr5a2,Osbpl11,Osbpl1a,Osbpl3,Osbpl6,Osbpl9,Pard3,Pclo,Pctp,Pgr,Picalm,Pitpnb,Pla2g7,Plcb1,Pld1,Plekha2,Plekha8,Pon1,Ptafr,Ptgs1,Rxrg,Sestd1,Sgk1,Snca,Snx10…
GO Molecular Function	GO:0003682	chromatin binding	36	3.02194e-05	0.0983338	0.00273149	1.54168	62.9182	97	0.029961	0.0461905	15	2.1432e-06	0.00697397	0.000464931	1.80535	33.7884	61	241	0.0215168	0.253112	region_1007,region_1008,region_1009,region_1010,region_1011,region_1025,region_107,region_1070,region_108,region_109,region_110,region_1105,region_1106,region_1255,region_1256,region_1314,region_1316,region_1317,region_1318,region_134,region_1380,region_1398,region_1409,region_1466,region_1467,region_1482,region_1484,region_1485,region_1536,region_1537,region_1560,region_160,region_161,region_161…	Adnp,Atoh1,Barx2,Chd1,Cited2,Ctnnb1,Cux1,Ddx1,Dlx2,Eed,Egr2,Ezh2,Foxc1,Foxp1,Gata6,Hdac2,Hinfp,Hmgn3,Jarid2,Kdm1a,Lef1,Mbd5,Mcmbp,Mitf,Msh6,Nanogpd,Ncoa2,Ncoa3,Neurod1,Neurog1,Nkx2-2,Nsd1,Pitx2,Pola1,Pou4f2,Prkaa2,Prkcb,Psip1,Rbpj,Rest,Rfx4,Rpa1,Sall1,Satb2,Smad2,Smad3,Smad6,Sox2,Sox9,Suz12,Tbl1x,Tcf7,Tcf7l1,Tcf7l2,Tcfap2a,Tfam,Tgif1,Tle1,Tle4,Tox3,Tshz3
GO Molecular Function	GO:0005543	phospholipid binding	37	3.79456e-05	0.123475	0.00333716	1.63735	45.8058	75	0.0218123	0.0357143	61	0.00134138	1	0.0715548	1.58094	27.1989	43	194	0.0151676	0.221649	region_1018,region_1216,region_1217,region_1226,region_1236,region_1237,region_1250,region_1291,region_1305,region_1306,region_1325,region_1406,region_1407,region_1408,region_144,region_1450,region_1451,region_1452,region_1453,region_1460,region_1513,region_1566,region_1567,region_1568,region_1574,region_1624,region_1625,region_1695,region_1696,region_1703,region_1723,region_1724,region_1725,regi…	Anxa2,Anxa3,Arhgap32,Bdh1,Ccdc88a,Clvs1,Col4a3bp,Dab1,Dapp1,Doc2b,Eea1,Epb4.1,F3,Faah,Itpr1,Ldlrap1,Mark1,Myof,Pard3,Pclo,Pctp,Picalm,Pla2g7,Plcb1,Pld1,Plekha2,Pon1,Ptafr,Sestd1,Sgk1,Snx10,Snx11,Snx14,Snx16,Snx24,Snx27,Snx5,Snx9,Syt14,Thy1,Tiam1,Twf1,Wdfy3
GO Molecular Function	GO:0043565	sequence-specific DNA binding	38	4.00368e-05	0.13028	0.00342841	1.29978	174.645	227	0.0831643	0.108095	8	1.43553e-10	4.67122e-07	5.83903e-08	1.64935	91.5511	151	653	0.0532628	0.23124	region_1008,region_1009,region_1010,region_1011,region_1025,region_1033,region_1034,region_1036,region_107,region_108,region_109,region_1093,region_110,region_1101,region_1105,region_1106,region_1109,region_1117,region_1118,region_1123,region_1135,region_1141,region_1150,region_1151,region_1152,region_1170,region_1171,region_1172,region_1173,region_118,region_1189,region_119,region_1193,region_11…	Adnp,Atf6,Atoh1,Bach2,Barx2,Bcl2,Chrac1,Creb1,Creb3l2,Crebl2,Cux1,Dbx1,Dlx2,Dmbx1,Dmrt1,Dmrt2,Dmrta2,Duxbl,Ehf,Elf5,Elk3,Emx1,Emx2,En2,Eomes,Epas1,Esr2,Esrrb,Esrrg,Etv1,Etv5,Etv6,Evx1,Fezf1,Fezf2,Fli1,Foxb1,Foxc1,Foxd1,Foxd2,Foxd3,Foxi1,Foxi3,Foxj3,Foxk1,Foxn2,Foxn3,Foxo1,Foxo6,Foxp1,Gata3,Gata5,Gata6,Gbx2,Hdac2,Hes1,Hif1a,Hlx,Hnf1b,Hnrnpd,Hoxb13,Hoxc4,Hsf2,Hsfy2,Irx1,Irx3,Irx5,Irx6,Lass6,Lef1,Lh…
GO Molecular Function	GO:0004815	aspartate-tRNA ligase activity	39	7.59702e-05	0.247207	0.00633864	18.5306	0.215859	4	0.00010279	0.00190476	734	0.260751	1	1	3.56631	0.280402	1	2	0.000352734	0.5	region_1160,region_1161,region_1162,region_1163	Dars
GO Molecular Function	GO:0016301	kinase activity	40	8.41991e-05	0.273984	0.0068496	1.29833	161.746	210	0.0770219	0.1	30	2.47859e-05	0.0806534	0.00268845	1.35698	117.909	160	841	0.0564374	0.19025	region_0,region_102,region_1035,region_1036,region_1040,region_105,region_107,region_108,region_109,region_110,region_1110,region_1111,region_1116,region_1131,region_1159,region_1165,region_1174,region_1176,region_1184,region_1191,region_1216,region_1217,region_1225,region_1227,region_1250,region_1270,region_1287,region_1294,region_1312,region_1319,region_1320,region_1321,region_1330,region_1342,…	1110020G09Rik,6430598A04Rik,Aak1,Abl2,Acvr1,Akap1,Akap2,Akap7,Akt2,B230120H23Rik,Bmp2k,Bmpr2,Camk1d,Camk1g,Camk2d,Ccnh,Cdc7,Cdk13,Cdk15,Cdk17,Cdk20,Cdk6,Cdkl1,Cdkl4,Cmpk2,Col4a3bp,Csnk1g3,Csnk2a2,D8Ertd82e,Dclk2,Ddr1,Dgkg,Dgki,Dscaml1,Dusp16,Dyrk2,Eef2k,Eif2ak2,Epha2,Epha4,Epha7,Fastkd2,Fert2,Fgfr1,Fgr,Frk,Gtf2h2,Gucy2c,Hmcn1,Ick,Igf1r,Igsf10,Ikbkap,Ikbke,Ip6k1,Ip6k2,Jak2,Kalrn,Kcnh1,Kcnh8,Kit,Ks…
GO Molecular Function	GO:0030695	GTPase regulator activity	41	0.00010737	0.349382	0.0085215	1.40717	90.2518	127	0.0429771	0.0604762	26	9.3274e-06	0.0303513	0.00116736	1.57884	53.8371	85	384	0.0299824	0.221354	region_1022,region_1027,region_103,region_104,region_1053,region_1066,region_1067,region_1136,region_1165,region_1185,region_1186,region_1187,region_1203,region_1216,region_1217,region_122,region_123,region_124,region_1250,region_1272,region_1275,region_1278,region_1279,region_1280,region_1301,region_1307,region_1308,region_1309,region_1310,region_1356,region_1357,region_1360,region_1365,region_1…	4930474N05Rik,Acap2,Agfg2,Arfgap3,Arhgap10,Arhgap15,Arhgap18,Arhgap21,Arhgap24,Arhgap25,Arhgap26,Arhgap28,Arhgap29,Arhgap32,Arhgap42,Arhgap5,Arhgef10,Arhgef10l,Arhgef19,Arhgef26,Arhgef3,Asap1,Axin2,Bcar3,Chn2,Dab2ip,Depdc1b,Dgki,Dis3,Dnmbp,Dock1,Dock2,Dock4,Dock5,Dock7,Fam13b,Farp1,Fgd2,Fgd4,Fgd6,Iqgap1,Iqgap2,Kalrn,Lekr1,Lrrk2,Map4k3,Nf1,Pde6d,Plcb1,Plekhg1,Plekhg6,Prex2,Psd3,Psd4,Rab3gap2,Ralga…
GO Molecular Function	GO:0001158	enhancer sequence-specific DNA binding	42	0.000119321	0.388272	0.00924457	2.5063	8.77787	22	0.00417994	0.0104762	16	2.20486e-06	0.0071746	0.000448413	4.61523	2.38341	11	17	0.00388007	0.647059	region_1025,region_107,region_108,region_109,region_110,region_1331,region_1332,region_1349,region_1494,region_1501,region_1926,region_1927,region_1995,region_285,region_286,region_373,region_374,region_375,region_376,region_377,region_378,region_423	Esrrb,Fli1,Gata3,Gata5,Lmo4,Nanogpd,Sall1,Sox11,Sox9,Tcfap2a,Tcfap2c
GO Molecular Function	GO:0043208	glycosphingolipid binding	43	0.000128554	0.418314	0.00972823	6.51153	1.07502	7	0.000511913	0.00333333	89	0.00456447	1	0.166885	4.75509	0.841205	4	6	0.00141094	0.666667	region_1180,region_1181,region_1182,region_1753,region_379,region_669,region_670	Clip3,Lama1,Lamb1,Lamc1
GO Molecular Function	GO:0016772	transferase activity, transferring phosphorus-containing groups	44	0.000148276	0.48249	0.0109657	1.27235	176.838	225	0.0842086	0.107143	46	0.000318022	1	0.0224966	1.27737	135.434	173	966	0.0610229	0.179089	region_0,region_102,region_1035,region_1036,region_1040,region_105,region_107,region_108,region_1082,region_1083,region_1089,region_109,region_110,region_1110,region_1111,region_1116,region_1131,region_1159,region_1165,region_1174,region_1176,region_1177,region_1178,region_1179,region_1184,region_1191,region_1216,region_1217,region_1225,region_1227,region_1250,region_1270,region_1287,region_1294,…	1110020G09Rik,6430598A04Rik,Aak1,Abl2,Acvr1,Akap1,Akap2,Akap7,Akt2,B230120H23Rik,Bmp2k,Bmpr2,Camk1d,Camk1g,Camk2d,Ccnh,Cdc7,Cdk13,Cdk15,Cdk17,Cdk20,Cdk6,Cdkl1,Cdkl4,Cds1,Chrac1,Cmpk2,Col4a3bp,Csnk1g3,Csnk2a2,D8Ertd82e,Dclk2,Ddr1,Dgkg,Dgki,Dscaml1,Dusp16,Dyrk2,Eef2k,Eif2ak2,Epha2,Epha4,Epha7,Fastkd2,Fert2,Fgfr1,Fgr,Frk,Gmppb,Grinl1a,Gtf2h2,Gucy2c,Hmcn1,Ick,Igf1r,Igsf10,Ikbkap,Ikbke,Ip6k1,Ip6k2,Jak…
GO Molecular Function	GO:0008134	transcription factor binding	45	0.000154176	0.501689	0.0111486	1.42632	79.2247	113	0.0377261	0.0538095	10	9.19924e-08	0.000299343	2.99343e-05	1.78875	44.724	80	319	0.0282187	0.250784	region_1008,region_1009,region_1010,region_1011,region_1117,region_1118,region_1150,region_1151,region_1152,region_118,region_119,region_1194,region_1255,region_1256,region_1262,region_1263,region_1264,region_1316,region_1317,region_1318,region_1331,region_1332,region_134,region_1409,region_1466,region_1467,region_1472,region_1476,region_1536,region_1537,region_1549,region_1560,region_160,region_…	Apbb2,Arhgef10l,Bcl2,Bcor,Cand1,Cited2,Creb1,Ctnnb1,Dip2c,Ebf1,Egr2,Epas1,Esrrb,Faf1,Foxb1,Foxc1,Foxd1,Foxd2,Foxd3,Foxi1,Foxi3,Foxj3,Foxk1,Foxn2,Foxn3,Foxo1,Foxo6,Foxp1,Gata6,Gtf2a1,Hdac2,Hdac9,Hes1,Hif1a,Id3,Id4,Kdm1a,Lcor,Lef1,Lmo4,Lpin1,Mafb,Med13,Med14,Med30,Myst4,Ncor1,Neurod1,Nfkbia,Nkx2-2,Nolc1,Npm1,Nsd1,Pbx1,Pim1,Prdm5,Prickle1,Psip1,Psma6,Rbfox2,Rbl1,Rbpj,Rest,Rptor,Sall1,Sirt1,Smad2,Sma…
GO Molecular Function	GO:0008276	protein methyltransferase activity	46	0.000185958	0.605109	0.0131545	2.32161	10.3377	24	0.0049227	0.0114286	86	0.00417541	1	0.157986	1.95572	8.69245	17	62	0.00599647	0.274193	region_1051,region_1060,region_1061,region_1062,region_1063,region_1205,region_1206,region_1207,region_1223,region_125,region_1361,region_1520,region_1521,region_1594,region_1767,region_1793,region_1941,region_2072,region_312,region_632,region_688,region_73,region_952,region_953	1700106N22Rik,4833442J19Rik,Eed,Ehmt1,Ezh2,Mll5,Nsd1,Pcmt1,Pcmtd1,Prdm9,Prmt3,Prmt7,Setd1b,Setd2,Smyd2,Smyd3,Suz12
GO Molecular Function	GO:0005096	GTPase activator activity	47	0.000207637	0.67565	0.0143755	1.53254	50.8959	78	0.0242362	0.0371429	39	8.87204e-05	0.288696	0.00740247	1.69193	30.1432	51	215	0.0179894	0.237209	region_1022,region_1027,region_103,region_104,region_1053,region_1066,region_1067,region_1165,region_1203,region_1216,region_1217,region_122,region_1278,region_1279,region_1280,region_1307,region_1308,region_1356,region_1357,region_1371,region_1372,region_1375,region_1376,region_1450,region_1451,region_1452,region_1453,region_1462,region_1463,region_1540,region_1541,region_1542,region_1543,region…	Acap2,Agfg2,Arfgap3,Arhgap10,Arhgap15,Arhgap18,Arhgap21,Arhgap24,Arhgap25,Arhgap26,Arhgap28,Arhgap29,Arhgap32,Arhgap42,Arhgap5,Arhgef19,Asap1,Axin2,Chn2,Dab2ip,Depdc1b,Dock2,Dock4,Fam13b,Iqgap1,Iqgap2,Lrrk2,Nf1,Plcb1,Plekhg6,Prex2,Rab3gap2,Ralgapa2,Rap1gap,Rapgef2,Rgs17,Rgs20,Rgs7,Sipa1l1,Srgap1,Srgap2,Srgap3,Stard13,Tbc1d1,Tbc1d2,Tbc1d23,Tbc1d25,Tbc1d2b,Tbc1d9,Thy1,Wnt11
GO Molecular Function	GO:0060589	nucleoside-triphosphatase regulator activity	48	0.000233813	0.760826	0.0158506	1.37984	92.0395	127	0.0438284	0.0604762	33	3.10953e-05	0.101184	0.00306618	1.53099	55.5195	85	396	0.0299824	0.214646	region_1022,region_1027,region_103,region_104,region_1053,region_1066,region_1067,region_1136,region_1165,region_1185,region_1186,region_1187,region_1203,region_1216,region_1217,region_122,region_123,region_124,region_1250,region_1272,region_1275,region_1278,region_1279,region_1280,region_1301,region_1307,region_1308,region_1309,region_1310,region_1356,region_1357,region_1360,region_1365,region_1…	4930474N05Rik,Acap2,Agfg2,Arfgap3,Arhgap10,Arhgap15,Arhgap18,Arhgap21,Arhgap24,Arhgap25,Arhgap26,Arhgap28,Arhgap29,Arhgap32,Arhgap42,Arhgap5,Arhgef10,Arhgef10l,Arhgef19,Arhgef26,Arhgef3,Asap1,Axin2,Bcar3,Chn2,Dab2ip,Depdc1b,Dgki,Dis3,Dnmbp,Dock1,Dock2,Dock4,Dock5,Dock7,Fam13b,Farp1,Fgd2,Fgd4,Fgd6,Iqgap1,Iqgap2,Kalrn,Lekr1,Lrrk2,Map4k3,Nf1,Pde6d,Plcb1,Plekhg1,Plekhg6,Prex2,Psd3,Psd4,Rab3gap2,Ralga…
GO Molecular Function	GO:0008815	citrate (pro-3S)-lyase activity	49	0.000241593	0.786142	0.0160437	13.6671	0.292673	4	0.000139368	0.00190476	385	0.140201	1	1	7.13263	0.140201	1	1	0.000352734	1	region_613,region_614,region_615,region_616	Clybl
GO Molecular Function	GO:0004672	protein kinase activity	50	0.000339494	1	0.0220943	1.31169	124.267	163	0.0591748	0.077619	17	2.23169e-06	0.00726191	0.000427171	1.48547	84.8215	126	605	0.0444444	0.208264	region_0,region_102,region_1040,region_105,region_107,region_108,region_109,region_110,region_1110,region_1111,region_1116,region_1131,region_1159,region_1165,region_1174,region_1176,region_1184,region_1216,region_1217,region_1225,region_1227,region_1250,region_1270,region_1287,region_1294,region_1312,region_1330,region_1342,region_1343,region_1344,region_1345,region_1351,region_1358,region_1385,…	Aak1,Abl2,Acvr1,Akt2,B230120H23Rik,Bmp2k,Bmpr2,Camk1d,Camk1g,Camk2d,Ccnh,Cdc7,Cdk13,Cdk15,Cdk17,Cdk20,Cdk6,Cdkl1,Cdkl4,Csnk1g3,Csnk2a2,D8Ertd82e,Dclk2,Ddr1,Dyrk2,Eef2k,Eif2ak2,Epha2,Epha4,Epha7,Fastkd2,Fert2,Fgfr1,Fgr,Frk,Gtf2h2,Gucy2c,Hmcn1,Ick,Igf1r,Igsf10,Ikbkap,Ikbke,Jak2,Kalrn,Kcnh1,Kcnh8,Kit,Ksr1,Lats2,Limk2,Lmtk2,Lrrk2,Map2k6,Map3k7,Map4k3,Mapk10,Mark1,Mark2,Mast4,Mertk,Myo3a,Myo3b,Nek10,N…
GO Molecular Function	GO:0004693	cyclin-dependent protein kinase activity	51	0.000438493	1	0.0279776	2.93365	4.77222	14	0.00227248	0.00666667	187	0.0228654	1	0.397882	2.07076	4.34622	9	31	0.0031746	0.290323	region_1110,region_1504,region_1505,region_2047,region_214,region_215,region_264,region_265,region_319,region_403,region_442,region_678,region_679,region_680	Cdk13,Cdk15,Cdk17,Cdk20,Cdk6,Cdkl1,Cdkl4,Ick,Stk30
GO Molecular Function	GO:0048487	beta-tubulin binding	52	0.000452774	1	0.0283332	4.10628	2.19176	9	0.0010437	0.00428571	75	0.0026352	1	0.114333	3.00321	2.66382	8	19	0.00282187	0.421053	region_1019,region_1484,region_1485,region_1495,region_1588,region_1648,region_2020,region_687,region_88	Adnp,Akap1,Arl8b,B4galt1,Bbs4,Lrpprc,Trpv4,Vapb
GO Molecular Function	GO:0030554	adenyl nucleotide binding	53	0.000457766	1	0.0281051	1.19687	264.858	317	0.126123	0.150952	125	0.0114899	1	0.299105	1.14234	215.348	246	1536	0.0867725	0.160156	region_0,region_100,region_1000,region_1001,region_1002,region_1003,region_102,region_1037,region_1040,region_105,region_1098,region_1099,region_1100,region_1101,region_1110,region_1111,region_1123,region_1131,region_1159,region_1160,region_1161,region_1162,region_1163,region_1165,region_1169,region_117,region_1174,region_1176,region_1177,region_1178,region_1179,region_1184,region_1191,region_120…	2610528E23Rik,Aak1,Abca13,Abca4,Abcb5,Abcc2,Abcc4,Abcg8,Abl2,Acsl4,Actbl2,Actg1,Actr2,Acvr1,Adcy1,Adcy3,Adcy5,Adcy8,Akap7,Akt2,Asns,Ass1,Atad2b,Atl1,Atp10a,Atp10d,Atp11b,Atp12a,Atp8a1,B230120H23Rik,Bbs10,Bmp2k,Bmpr2,Btaf1,Cacna1b,Camk1d,Camk1g,Camk2d,Cct6b,Cdc7,Cdk13,Cdk15,Cdk17,Cdk20,Cdk6,Cdkl1,Cdkl4,Cftr,Chd1,Chd1l,Chd2,Chd6,Chd7,Chd9,Chst15,Clcn3,Cmpk2,Csnk1g3,Csnk2a2,D1Pas1,D8Ertd82e,Dars,Dcl…
GO Molecular Function	GO:0003712	transcription cofactor activity	54	0.000619707	1	0.0373431	1.40263	71.2946	100	0.0339498	0.0476191	12	5.04266e-07	0.00164088	0.00013674	1.80275	38.2748	69	273	0.0243386	0.252747	region_1012,region_1013,region_1014,region_1015,region_1016,region_1020,region_1039,region_1065,region_1070,region_1190,region_1223,region_1245,region_1246,region_1247,region_1261,region_13,region_134,region_1349,region_1365,region_1409,region_1466,region_1467,region_1482,region_1520,region_1521,region_1591,region_1592,region_1593,region_16,region_160,region_161,region_1676,region_1677,region_168…	Abra,Arid5b,Atf7ip,Bcor,C1d,Cited2,Cops5,Ctbp2,Ctnnb1,Ddx1,Elk3,Esrrb,Gata3,Hdac2,Hdac9,Hinfp,Jazf1,Kdm1a,Lmcd1,Lpin1,Maml1,Maml2,Maml3,Med13,Med13l,Med14,Med27,Med30,Mkl2,Mll5,Ncoa2,Ncoa3,Ncor1,Neurod1,Neurog3,Nkx2-2,Nsd1,Pcbd1,Pdlim1,Pex14,Pou3f1,Prkcb,Prox1,Psip1,Rbfox2,Rbpms,Rcor2,Rybp,Sall1,Sertad2,Sik1,Sirt1,Smarca2,Sox11,Sox4,Ss18,Tada1,Tbl1x,Tbl1xr1,Tbx18,Tbx20,Tcf4,Tcfap2a,Thrap3,Tle1,Tl…
GO Molecular Function	GO:0043566	structure-specific DNA binding	55	0.000622176	1	0.0368102	1.5156	45.5267	69	0.0216794	0.0328571	56	0.000863877	1	0.0501974	1.61423	26.6381	43	190	0.0151676	0.226316	region_1008,region_1009,region_1010,region_1011,region_1021,region_1098,region_1099,region_1100,region_1117,region_1118,region_1123,region_1160,region_1161,region_1162,region_1199,region_1202,region_1262,region_1263,region_1264,region_1409,region_1613,region_1614,region_1647,region_1680,region_1681,region_1682,region_1683,region_1692,region_1702,region_1707,region_1708,region_1709,region_1710,reg…	Aim2,Atoh1,Creb1,Ctnnb1,Ddx58,Ercc4,Foxb1,Foxc1,Foxd1,Foxd2,Foxd3,Foxi1,Foxi3,Foxj3,Foxk1,Foxn2,Foxn3,Foxo1,Foxo6,Foxp1,Gata6,Klf6,Lrpprc,Mcm6,Msh2,Msh6,Myc,Neurod1,Neurog3,Nfib,Nr3c2,Obfc2a,Pola1,Psip1,Rad18,Refbp2,Rpa1,Smad2,Smad3,Ssbp2,Terf2,Xrcc5,Yy1
GO Molecular Function	GO:0032559	adenyl ribonucleotide binding	56	0.000623114	1	0.0362074	1.19184	264.296	315	0.125855	0.15	138	0.0138023	1	0.325454	1.13824	214.367	244	1529	0.086067	0.159581	region_0,region_100,region_1000,region_1001,region_1002,region_1003,region_102,region_1037,region_1040,region_105,region_1098,region_1099,region_1100,region_1101,region_1110,region_1111,region_1123,region_1131,region_1159,region_1160,region_1161,region_1162,region_1163,region_1165,region_1169,region_117,region_1174,region_1176,region_1177,region_1178,region_1179,region_1184,region_1191,region_120…	2610528E23Rik,Aak1,Abca13,Abca4,Abcb5,Abcc2,Abcc4,Abcg8,Abl2,Acsl4,Actbl2,Actg1,Actr2,Acvr1,Adcy1,Adcy3,Adcy5,Adcy8,Akap7,Akt2,Asns,Ass1,Atad2b,Atl1,Atp10a,Atp10d,Atp11b,Atp12a,Atp8a1,B230120H23Rik,Bbs10,Bmp2k,Bmpr2,Btaf1,Cacna1b,Camk1d,Camk1g,Camk2d,Cct6b,Cdc7,Cdk13,Cdk15,Cdk17,Cdk20,Cdk6,Cdkl1,Cdkl4,Cftr,Chd1,Chd1l,Chd2,Chd6,Chd7,Chd9,Clcn3,Cmpk2,Csnk1g3,Csnk2a2,D1Pas1,D8Ertd82e,Dars,Dclk2,Ddr1…
GO Molecular Function	GO:0008757	S-adenosylmethionine-dependent methyltransferase activity	57	0.000768203	1	0.043855	2.06029	12.1342	25	0.0057782	0.0119048	274	0.0613033	1	0.728033	1.45895	12.3377	18	88	0.00634921	0.204545	region_1060,region_1061,region_1062,region_1063,region_1205,region_1206,region_1207,region_1223,region_125,region_1311,region_1361,region_1520,region_1521,region_1594,region_1767,region_1941,region_2072,region_312,region_322,region_341,region_632,region_688,region_952,region_953,region_964	1700106N22Rik,Ehmt1,Ezh2,Inmt,Mettl14,Mll5,Nsd1,Nsun2,Ocln,Pcmt1,Pcmtd1,Prdm9,Prmt3,Prmt7,Setd1b,Setd2,Smyd2,Smyd3
GO Molecular Function	GO:0016263	glycoprotein-N-acetylgalactosamine 3-beta-galactosyltransferase activity	58	0.000810769	1	0.045487	9.87644	0.405004	4	0.000192859	0.00190476	385	0.140201	1	1	7.13263	0.140201	1	1	0.000352734	1	region_919,region_920,region_921,region_922	C1galt1
GO Molecular Function	GO:0016773	phosphotransferase activity, alcohol group as acceptor	59	0.000862799	1	0.0475856	1.26496	143.087	181	0.0681367	0.0861905	35	3.31539e-05	0.107883	0.00308236	1.38275	100.524	139	717	0.04903	0.193863	region_0,region_102,region_1040,region_105,region_107,region_108,region_109,region_110,region_1110,region_1111,region_1116,region_1131,region_1159,region_1165,region_1174,region_1176,region_1184,region_1191,region_1216,region_1217,region_1225,region_1227,region_1250,region_1270,region_1287,region_1294,region_1312,region_1320,region_1321,region_1330,region_1342,region_1343,region_1344,region_1345,…	1110020G09Rik,Aak1,Abl2,Acvr1,Akt2,B230120H23Rik,Bmp2k,Bmpr2,Camk1d,Camk1g,Camk2d,Ccnh,Cdc7,Cdk13,Cdk15,Cdk17,Cdk20,Cdk6,Cdkl1,Cdkl4,Csnk1g3,Csnk2a2,D8Ertd82e,Dclk2,Ddr1,Dgkg,Dgki,Dyrk2,Eef2k,Eif2ak2,Epha2,Epha4,Epha7,Fastkd2,Fert2,Fgfr1,Fgr,Frk,Gtf2h2,Gucy2c,Hmcn1,Ick,Igf1r,Igsf10,Ikbkap,Ikbke,Ip6k1,Ip6k2,Jak2,Kalrn,Kcnh1,Kcnh8,Kit,Ksr1,Lats2,Limk2,Lmtk2,Lrrk2,Map2k6,Map3k7,Map4k3,Mapk10,Mark1,M…
GO Molecular Function	GO:0033862	UMP kinase activity	60	0.00090032	1	0.0488274	6.92033	0.722509	5	0.000344052	0.00238095	385	0.140201	1	1	7.13263	0.140201	1	1	0.000352734	1	region_373,region_374,region_375,region_376,region_377	Cmpk2
GO Molecular Function	GO:0003899	DNA-directed RNA polymerase activity	61	0.000967424	1	0.0516065	3.15885	3.48228	11	0.00165823	0.00523809	355	0.10738	1	0.984264	1.63031	4.90703	8	35	0.00282187	0.228571	region_1082,region_1083,region_1816,region_1817,region_202,region_2034,region_2035,region_204,region_2095,region_62,region_864	Grinl1a,Pola1,Polr2a,Polr2d,Polr2e,Polr3b,Polr3e,Prim2
GO Molecular Function	GO:0031727	CCR2 chemokine receptor binding	62	0.00102261	1	0.0536706	9.27124	0.431442	4	0.000205448	0.00190476	935	0.364405	1	1	2.37754	0.420602	1	3	0.000352734	0.333333	region_78,region_79,region_80,region_81	Ccl2
GO Molecular Function	GO:0008047	enzyme activator activity	63	0.00104189	1	0.0538146	1.40071	65.6808	92	0.0312766	0.0438095	77	0.0027834	1	0.117626	1.41285	43.8828	62	313	0.0218695	0.198083	region_1022,region_1027,region_103,region_104,region_1053,region_1066,region_1067,region_1165,region_1203,region_1216,region_1217,region_122,region_1261,region_1278,region_1279,region_1280,region_1282,region_1307,region_1308,region_1356,region_1357,region_1371,region_1372,region_1375,region_1376,region_1450,region_1451,region_1452,region_1453,region_1462,region_1463,region_1540,region_1541,region…	Acap2,Agfg2,Arfgap3,Arhgap10,Arhgap15,Arhgap18,Arhgap21,Arhgap24,Arhgap25,Arhgap26,Arhgap28,Arhgap29,Arhgap32,Arhgap42,Arhgap5,Arhgef19,Asap1,Axin2,Chn2,Cyb5b,Dab2ip,Depdc1b,Dock2,Dock4,Elp2,Fam13b,Guca2a,Igfbp3,Iqgap1,Iqgap2,Lrrk2,Ltc4s,Mgst2,Nf1,Plcb1,Plekhg6,Prex2,Prkce,Rab3gap2,Ralgapa2,Rap1gap,Rapgef2,Rgs17,Rgs20,Rgs7,Sfrp2,Sipa1l1,Spry2,Srgap1,Srgap2,Srgap3,Stard13,Stk3,Tbc1d1,Tbc1d2,Tbc1d2…
GO Molecular Function	GO:0031625	ubiquitin protein ligase binding	64	0.00105339	1	0.0535581	1.7814	19.6474	35	0.00935592	0.0166667	57	0.000930947	1	0.0531457	1.87322	13.8799	26	99	0.00917108	0.262626	region_1021,region_103,region_104,region_1132,region_1150,region_1151,region_1152,region_1425,region_1426,region_1701,region_1733,region_190,region_2012,region_2020,region_2024,region_2070,region_2071,region_2092,region_342,region_343,region_369,region_400,region_504,region_60,region_62,region_621,region_628,region_699,region_700,region_898,region_899,region_900,region_944,region_945,region_97	Arih1,Atp6v0c,Axin2,Bcl2,Brca1,Cul3,Cul4b,Cul5,Egr2,Faf1,Nfkbia,Park2,Pax6,Pik3r1,Pink1,Polr2a,Prkar2a,Rad18,Smad2,Smad3,Smad6,Snx9,Stx8,Trib1,Trib2,Usp7
GO Molecular Function	GO:0047493	ceramide cholinephosphotransferase activity	65	0.00108418	1	0.0542758	9.12424	0.438393	4	0.000208759	0.00190476	160	0.0196503	1	0.399638	7.13263	0.280402	2	2	0.000705467	1	region_1319,region_1320,region_811,region_812	Sgms1,Sgms2
GO Molecular Function	GO:0033188	sphingomyelin synthase activity	65	0.00108418	1	0.0542758	9.12424	0.438393	4	0.000208759	0.00190476	160	0.0196503	1	0.399638	7.13263	0.280402	2	2	0.000705467	1	region_1319,region_1320,region_811,region_812	Sgms1,Sgms2
GO Molecular Function	GO:0005524	ATP binding	67	0.00113071	1	0.0549154	1.18331	259.442	307	0.123544	0.146191	186	0.0227968	1	0.398821	1.12645	211.283	238	1507	0.0839506	0.15793	region_0,region_100,region_1000,region_1001,region_1002,region_1003,region_102,region_1037,region_1040,region_105,region_1098,region_1099,region_1100,region_1101,region_1110,region_1111,region_1123,region_1131,region_1159,region_1160,region_1161,region_1162,region_1163,region_1165,region_1169,region_117,region_1174,region_1176,region_1177,region_1178,region_1179,region_1184,region_1191,region_120…	2610528E23Rik,Aak1,Abca13,Abca4,Abcb5,Abcc2,Abcc4,Abcg8,Abl2,Acsl4,Actbl2,Actg1,Actr2,Acvr1,Adcy1,Adcy3,Adcy5,Adcy8,Akt2,Asns,Ass1,Atad2b,Atl1,Atp10a,Atp10d,Atp11b,Atp12a,Atp8a1,B230120H23Rik,Bbs10,Bmp2k,Bmpr2,Btaf1,Cacna1b,Camk1d,Camk1g,Camk2d,Cct6b,Cdc7,Cdk13,Cdk15,Cdk17,Cdk20,Cdk6,Cdkl1,Cdkl4,Cftr,Chd1,Chd1l,Chd2,Chd6,Chd7,Chd9,Clcn3,Cmpk2,Csnk1g3,Csnk2a2,D1Pas1,D8Ertd82e,Dars,Dclk2,Ddr1,Ddx1,…
GO Molecular Function	GO:0004798	thymidylate kinase activity	68	0.00113207	1	0.0541731	6.56888	0.761165	5	0.000362459	0.00238095	734	0.260751	1	1	3.56631	0.280402	1	2	0.000352734	0.5	region_373,region_374,region_375,region_376,region_377	Cmpk2
GO Molecular Function	GO:0008022	protein C-terminus binding	69	0.00113378	1	0.0534686	1.7143	22.7498	39	0.0108332	0.0185714	240	0.0516795	1	0.700688	1.39309	17.9457	25	128	0.00881834	0.195312	region_100,region_1064,region_1078,region_1085,region_1086,region_1123,region_1135,region_1353,region_149,region_150,region_151,region_152,region_1832,region_1833,region_188,region_1907,region_1942,region_2001,region_2002,region_2003,region_2004,region_2087,region_298,region_342,region_343,region_413,region_428,region_430,region_457,region_691,region_699,region_700,region_708,region_709,region_71…	Akap7,Atxn1,Cadm1,Coil,Ctnnb1,Dab2,Dst,Efhc1,Ercc4,Fbln5,Foxn3,Homer3,Mki67,Msh2,Ncl,Nsf,Pik3r1,Ppm1a,Sirt1,Sntg1,Synj1,Terf2,Usp7,Vim,Xrcc5
GO Molecular Function	GO:0000989	transcription factor binding transcription factor activity	70	0.00125247	1	0.0582221	1.36882	73.7861	101	0.0351362	0.0480952	13	9.86552e-07	0.00321024	0.000246941	1.76425	39.6768	70	283	0.0246914	0.24735	region_1012,region_1013,region_1014,region_1015,region_1016,region_1020,region_1039,region_1065,region_1070,region_1190,region_1223,region_1245,region_1246,region_1247,region_1261,region_13,region_134,region_1349,region_1365,region_1409,region_1466,region_1467,region_1482,region_1520,region_1521,region_1591,region_1592,region_1593,region_16,region_160,region_161,region_1676,region_1677,region_168…	Abra,Arid5b,Atf7ip,Bcor,C1d,Cited2,Cops5,Ctbp2,Ctnnb1,Ddx1,Elk3,Esrrb,Gata3,Hdac2,Hdac9,Hinfp,Jazf1,Kdm1a,Lmcd1,Lpin1,Maml1,Maml2,Maml3,Med13,Med13l,Med14,Med27,Med30,Mkl2,Mll5,Ncoa2,Ncoa3,Ncor1,Neurod1,Neurog1,Neurog3,Nkx2-2,Nsd1,Pcbd1,Pdlim1,Pex14,Pou3f1,Prkcb,Prox1,Psip1,Rbfox2,Rbpms,Rcor2,Rybp,Sall1,Sertad2,Sik1,Sirt1,Smarca2,Sox11,Sox4,Ss18,Tada1,Tbl1x,Tbl1xr1,Tbx18,Tbx20,Tcf4,Tcfap2a,Thrap3…
GO Molecular Function	GO:0004715	non-membrane spanning protein tyrosine kinase activity	71	0.00126312	1	0.0578899	2.29432	7.84548	18	0.00373594	0.00857143	134	0.012878	1	0.312724	1.9905	6.02863	12	43	0.0042328	0.27907	region_1184,region_1554,region_159,region_1632,region_1726,region_1875,region_1876,region_1877,region_1878,region_307,region_511,region_582,region_659,region_660,region_661,region_662,region_675,region_807	Abl2,D8Ertd82e,Eif2ak2,Fert2,Fgr,Frk,Jak2,Ptk2,Ptk2b,Ripk2,Sykb,Tec
GO Molecular Function	GO:0070300	phosphatidic acid binding	72	0.00126556	1	0.0571962	6.4035	0.780823	5	0.00037182	0.00238095	160	0.0196503	1	0.399638	7.13263	0.280402	2	2	0.000705467	1	region_1216,region_1217,region_1406,region_1407,region_1408	Mark1,Sestd1
GO Molecular Function	GO:0042578	phosphoric ester hydrolase activity	73	0.0012785	1	0.0569897	1.3802	69.5549	96	0.0331214	0.0457143	32	2.87072e-05	0.0934131	0.00291916	1.5923	45.8457	73	327	0.0257496	0.223242	region_1,region_1029,region_1035,region_1036,region_1071,region_1072,region_1073,region_1087,region_1136,region_1137,region_1150,region_1151,region_1152,region_1157,region_1215,region_1250,region_1274,region_128,region_1298,region_1352,region_1401,region_1410,region_1445,region_1449,region_1450,region_1451,region_1452,region_1453,region_1454,region_1472,region_148,region_1480,region_1481,region_1…	9630033F20Rik,Acpl2,Bpgm,C330005M16Rik,Cdc25b,Ctdspl,Dupd1,Dusp10,Dusp16,Dusp26,Dusp4,Dusp6,Enpp1,Enpp3,Enpp6,Epm2a,Eya1,Eya2,Eya3,Fbp1,Fbp2,Gde1,Gdpd4,Gpcpd1,Inpp4b,Inpp5a,Inpp5d,Inpp5f,Lpin1,Minpp1,Mtmr10,Mtmr12,Mtmr2,Mtmr3,Nt5c2,Nt5e,Pde11a,Pde1a,Pde1b,Pde6d,Pde8a,Pfkfb3,Phlpp1,Plcb1,Plcb4,Plcg2,Plch1,Plcxd2,Pld1,Pon1,Ppap2a,Ppap2b,Ppm1a,Ppp1cb,Ppp1r3c,Pten,Ptp4a2,Ptpdc1,Ptpn12,Ptpn18,Ptpn2,Pt…
GO Molecular Function	GO:0004064	arylesterase activity	74	0.00137313	1	0.0603804	8.55142	0.467759	4	0.000222742	0.00190476	317	0.0970323	1	0.996035	3.56631	0.560803	2	4	0.000705467	0.5	region_912,region_913,region_914,region_915	Pon1,Pon2
GO Molecular Function	GO:0070890	sodium-dependent L-ascorbate transmembrane transporter activity	75	0.00138731	1	0.0601907	14.0308	0.213815	3	0.000101817	0.00142857	734	0.260751	1	1	3.56631	0.280402	1	2	0.000352734	0.5	region_1446,region_1447,region_1448	Slc23a2
GO Molecular Function	GO:0008520	L-ascorbate:sodium symporter activity	75	0.00138731	1	0.0601907	14.0308	0.213815	3	0.000101817	0.00142857	734	0.260751	1	1	3.56631	0.280402	1	2	0.000352734	0.5	region_1446,region_1447,region_1448	Slc23a2
GO Molecular Function	GO:0016791	phosphatase activity	77	0.00148932	1	0.0629385	1.44632	50.4729	73	0.0240347	0.0347619	51	0.00066559	1	0.0424672	1.5493	34.209	53	244	0.0186949	0.217213	region_1,region_1029,region_1035,region_1036,region_1071,region_1072,region_1073,region_1087,region_1137,region_1150,region_1151,region_1152,region_1157,region_1215,region_128,region_1298,region_1352,region_1445,region_1480,region_1481,region_1516,region_1517,region_1529,region_156,region_1642,region_1643,region_1668,region_1698,region_1719,region_1720,region_1721,region_1725,region_1751,region_1…	9630033F20Rik,Acpl2,Bpgm,C330005M16Rik,Cdc25b,Ctdspl,Dupd1,Dusp10,Dusp16,Dusp26,Dusp4,Dusp6,Epm2a,Eya1,Eya2,Eya3,Fbp1,Fbp2,Inpp4b,Inpp5a,Inpp5d,Lpin1,Minpp1,Mtmr10,Mtmr12,Mtmr2,Mtmr3,Nt5c2,Nt5e,Pfkfb3,Phlpp1,Pon1,Ppap2a,Ppap2b,Ppm1a,Ppp1cb,Ppp1r3c,Pten,Ptp4a2,Ptpdc1,Ptpn12,Ptpn18,Ptpn2,Ptpn22,Ptpn3,Ptpn4,Ptprb,Ptpre,Ptprg,Ptprk,Ptprn2,Rngtt,Synj1
GO Molecular Function	GO:0004386	helicase activity	78	0.0015656	1	0.0653136	1.6828	23.1756	39	0.011036	0.0185714	210	0.0342463	1	0.530654	1.40712	20.6095	29	147	0.0102293	0.197279	region_1037,region_1123,region_1160,region_1161,region_1162,region_1220,region_1221,region_127,region_1293,region_1299,region_1474,region_1477,region_1478,region_1503,region_1624,region_1625,region_1647,region_1756,region_1783,region_1784,region_185,region_1917,region_1929,region_1930,region_2050,region_244,region_245,region_368,region_403,region_588,region_632,region_667,region_668,region_758,re…	2610528E23Rik,Atl1,Btaf1,Chd1,Chd1l,Chd2,Chd6,Chd7,Chd9,D1Pas1,Ddx1,Ddx11,Ddx39,Ddx43,Ddx47,Ddx52,Ddx58,Dhx35,Gtf2f2,Helb,Mcm6,Mov10,Rtel1,Shprh,Smarca2,Smarcad1,Supv3l1,Tdrd12,Xrcc5
GO Molecular Function	GO:0000988	protein binding transcription factor activity	79	0.0015701	1	0.0646723	1.35635	75.202	102	0.0358105	0.0485714	14	1.2411e-06	0.00403854	0.000288467	1.74626	40.6582	71	290	0.0250441	0.244828	region_1012,region_1013,region_1014,region_1015,region_1016,region_1020,region_1039,region_1065,region_1070,region_1190,region_1223,region_1245,region_1246,region_1247,region_1261,region_13,region_134,region_1349,region_1364,region_1365,region_1409,region_1466,region_1467,region_1482,region_1520,region_1521,region_1591,region_1592,region_1593,region_16,region_160,region_161,region_1676,region_167…	Abra,Arid5b,Atf7ip,Bcor,C1d,Cited2,Cops5,Ctbp2,Ctnnb1,Ddx1,Elk3,Esrrb,Gata3,Hdac2,Hdac9,Hinfp,Jazf1,Kdm1a,Lhx3,Lmcd1,Lpin1,Maml1,Maml2,Maml3,Med13,Med13l,Med14,Med27,Med30,Mkl2,Mll5,Ncoa2,Ncoa3,Ncor1,Neurod1,Neurog1,Neurog3,Nkx2-2,Nsd1,Pcbd1,Pdlim1,Pex14,Pou3f1,Prkcb,Prox1,Psip1,Rbfox2,Rbpms,Rcor2,Rybp,Sall1,Sertad2,Sik1,Sirt1,Smarca2,Sox11,Sox4,Ss18,Tada1,Tbl1x,Tbl1xr1,Tbx18,Tbx20,Tcf4,Tcfap2a,T…
GO Molecular Function	GO:0005525	GTP binding	80	0.0016065	1	0.0653444	1.41267	57.338	81	0.0273038	0.0385714	351	0.0995584	1	0.922972	1.17301	52.8557	62	377	0.0218695	0.164456	region_1019,region_1040,region_1084,region_113,region_1138,region_1139,region_1140,region_1143,region_1154,region_1166,region_1225,region_1272,region_1299,region_1381,region_1382,region_15,region_1503,region_1565,region_1642,region_1643,region_1691,region_1711,region_1712,region_1806,region_1807,region_1823,region_1831,region_1914,region_192,region_1938,region_2012,region_2025,region_2051,region_…	4930544G11Rik,5430435G22Rik,Arf1,Arfrp1,Arhgap5,Arl15,Arl4a,Arl4c,Arl8b,Atl1,Atl2,Diras2,Dnajc27,Dock1,Dock2,Dock4,Dock5,Dock7,Drg2,Eef1a1,Eif5,Gm266,Gmppb,Gna14,Gnao1,Gspt1,Gucy2c,Hhat,Lrrk2,Mmaa,Mocs1,Mras,Nmur2,Opa1,Rab1,Rab11a,Rab17,Rab23,Rab31,Rab39,Rab3c,Rab44,Rab5b,Rab7,Rala,Ralb,Rap1b,Rap2a,Rap2b,Rhobtb1,Rhoc,Rit2,Rnd2,Rnd3,Rnf112,Rngtt,Rragc,Rras2,Sept1,Sept11,Sept5,Sept9
GO Molecular Function	GO:0003678	DNA helicase activity	81	0.00173763	1	0.0698055	2.93017	3.75405	11	0.00178764	0.00523809	361	0.117029	1	1	1.66428	4.20602	7	30	0.00246914	0.233333	region_1123,region_1160,region_1161,region_1162,region_1503,region_185,region_244,region_245,region_403,region_667,region_668	Atl1,Ddx11,Helb,Mcm6,Rtel1,Supv3l1,Xrcc5
GO Molecular Function	GO:0043014	alpha-tubulin binding	82	0.00176865	1	0.0701851	3.36874	2.67162	9	0.0012722	0.00428571	73	0.00241662	1	0.107721	3.32856	2.10301	7	15	0.00246914	0.466667	region_1019,region_1138,region_1139,region_1140,region_1588,region_1648,region_2020,region_666,region_965	Arl4c,Arl8b,B4galt1,Bbs4,ORF19,Snca,Trpv4
GO Molecular Function	GO:0000981	sequence-specific DNA binding RNA polymerase II transcription factor activity	83	0.00180605	1	0.0708058	1.47486	43.394	64	0.0206638	0.0304762	20	3.68244e-06	0.0119827	0.000599134	2.06743	19.3477	40	138	0.0141093	0.289855	region_1007,region_1008,region_1009,region_1010,region_1011,region_107,region_108,region_109,region_110,region_1117,region_1118,region_1223,region_1262,region_1263,region_1264,region_1349,region_1425,region_1426,region_1494,region_1501,region_1560,region_1613,region_1614,region_166,region_1680,region_1681,region_1682,region_1692,region_1702,region_1707,region_1708,region_1709,region_1710,region_1…	Creb1,Foxb1,Foxc1,Foxd1,Foxd2,Foxd3,Foxi1,Foxi3,Foxj3,Foxk1,Foxn2,Foxn3,Foxo1,Foxo6,Foxp1,Gata3,Gata5,Gata6,Hes1,Hif1a,Hnf1b,Mitf,Nfib,Nr2e1,Pax6,Plscr1,Pou4f2,Prox1,Rcor1,Rest,Six3,Sox11,Sox30,Sox4,Sox7,Sox9,Tcf4,Tcfap2a,Tcfap2c,Twist1
GO Molecular Function	GO:0034237	protein kinase A regulatory subunit binding	84	0.00187546	1	0.0726519	3.66384	2.1835	8	0.00103976	0.00380952	115	0.00946992	1	0.267958	4.07579	0.981406	4	7	0.00141094	0.571429	region_149,region_150,region_151,region_152,region_594,region_661,region_662,region_88	Akap1,Akap11,Akap7,Pja2
GO Molecular Function	GO:0008092	cytoskeletal protein binding	85	0.00197264	1	0.0755172	1.29363	102.039	132	0.0485899	0.0628571	43	0.000212068	0.690068	0.0160481	1.40683	71.0818	100	507	0.0352734	0.197239	region_101,region_1019,region_1052,region_1064,region_1085,region_1086,region_1098,region_1099,region_1100,region_1101,region_1125,region_1138,region_1139,region_1140,region_1142,region_1153,region_1155,region_1156,region_1157,region_120,region_1212,region_1213,region_1283,region_129,region_130,region_131,region_132,region_1358,region_1384,region_1395,region_1439,region_1441,region_1442,region_14…	2510003E04Rik,4831426I19Rik,Abra,Actg1,Actn4,Actr2,Add3,Adnp,Agtpbp1,Akap1,Anxa2,Arhgap10,Arhgap26,Arhgap42,Arl4c,Arl8b,Asap1,B4galt1,Baiap2l1,Bbs4,Bcl2l11,Cald1,Calm2,Cap2,Ccdc88a,Clasp1,Clip3,Clmn,Ctnna1,Daam1,Dst,Dstn,Dync1i1,Enah,Enc1,Epb4.1,Epb4.1l2,Epb4.1l3,Epb4.1l5,Evl,Farp1,Fert2,Fgd4,Fhdc1,Fhod3,Fmnl2,Frmd5,Gc,Jakmip1,Kif26a,Klhl2,Ktn1,Limch1,Lmtk2,Lrpprc,Lrrk2,Mkl2,Mlph,Mtap1b,Mtss1,Myl…
GO Molecular Function	GO:0017111	nucleoside-triphosphatase activity	86	0.00212254	1	0.0803109	1.2753	112.914	144	0.0537687	0.0685714	617	0.168583	1	0.889091	1.0934	97.8602	107	698	0.0377425	0.153295	region_100,region_1026,region_1037,region_1039,region_1054,region_1055,region_1056,region_1057,region_1098,region_1099,region_1100,region_1101,region_1123,region_1154,region_1160,region_1161,region_1162,region_1169,region_117,region_1174,region_1205,region_1206,region_1207,region_1220,region_1221,region_1256,region_127,region_1272,region_1293,region_1299,region_1307,region_1308,region_1358,region…	2610528E23Rik,Abca13,Abca4,Abcb5,Abcc2,Abcc4,Abcg8,Arl4a,Atad2b,Atf7ip,Atl1,Atl2,Atp10a,Atp10d,Atp11b,Atp12a,Atp1b3,Atp6v1g3,Atp6v1h,Atp8a1,Bbs4,Btaf1,Ccnh,Cftr,Cgnl1,Chd1,Chd1l,Chd2,Chd6,Chd7,Chd9,D1Pas1,Ddx1,Ddx11,Ddx39,Ddx43,Ddx47,Ddx52,Ddx58,Dhx35,Diras2,Dync1i1,Dync2li1,Dynlrb1,Eef1a1,Entpd2,Gm266,Gna14,Gnao1,Gnas,Gnb3,Gspt1,Gtf2f2,Gtf2h2,Helb,Kif13b,Kif20b,Kif21a,Kif26a,Kif26b,Kif2a,Kif3a,K…
GO Molecular Function	GO:0016818	hydrolase activity, acting on acid anhydrides, in phosphorus-containing anhydrides	87	0.0021315	1	0.0797231	1.26816	118.281	150	0.0563245	0.0714286	631	0.187265	1	0.965708	1.08455	102.347	111	730	0.0391534	0.152055	region_100,region_1026,region_1037,region_1039,region_1054,region_1055,region_1056,region_1057,region_1098,region_1099,region_1100,region_1101,region_1123,region_1154,region_1160,region_1161,region_1162,region_1169,region_117,region_1174,region_1205,region_1206,region_1207,region_1220,region_1221,region_1256,region_127,region_1272,region_1293,region_1299,region_1307,region_1308,region_1358,region…	2610528E23Rik,Abca13,Abca4,Abcb5,Abcc2,Abcc4,Abcg8,Arl4a,Atad2b,Atf7ip,Atl1,Atl2,Atp10a,Atp10d,Atp11b,Atp12a,Atp1b3,Atp6v1g3,Atp6v1h,Atp8a1,Bbs4,Btaf1,Ccnh,Cftr,Cgnl1,Chd1,Chd1l,Chd2,Chd6,Chd7,Chd9,D1Pas1,Ddx1,Ddx11,Ddx39,Ddx43,Ddx47,Ddx52,Ddx58,Dhx35,Diras2,Dync1i1,Dync2li1,Dynlrb1,Eef1a1,Enpp1,Enpp3,Entpd2,Gm266,Gna14,Gnao1,Gnas,Gnb3,Gspt1,Gtf2f2,Gtf2h2,Helb,Kif13b,Kif20b,Kif21a,Kif26a,Kif26b,K…
GO Molecular Function	GO:0005160	transforming growth factor beta receptor binding	88	0.0021531	1	0.0796157	2.84898	3.86102	11	0.00183858	0.00523809	130	0.0121561	1	0.304277	2.85305	2.10301	6	15	0.0021164	0.4	region_1218,region_1219,region_1578,region_1579,region_2024,region_461,region_462,region_463,region_898,region_899,region_900	Gdnf,Smad2,Smad3,Smad6,Tgfb2,Tgfbr3
GO Molecular Function	GO:0003713	transcription coactivator activity	89	0.00225749	1	0.0825379	1.4975	38.0635	57	0.0181255	0.0271429	24	5.66103e-06	0.018421	0.000767541	1.97873	21.7311	43	155	0.0151676	0.277419	region_1065,region_1070,region_1190,region_1261,region_134,region_1349,region_1365,region_1409,region_1466,region_1467,region_1482,region_1520,region_1521,region_16,region_1683,region_1711,region_1712,region_1714,region_1731,region_1819,region_182,region_184,region_1870,region_1871,region_191,region_1926,region_1927,region_1974,region_1982,region_1999,region_2,region_2087,region_2091,region_275,r…	Abra,Arid5b,Cited2,Cops5,Ctnnb1,Esrrb,Gata3,Hinfp,Kdm1a,Lpin1,Maml1,Maml2,Maml3,Med13,Med14,Med27,Mkl2,Mll5,Ncoa2,Ncoa3,Neurod1,Neurog3,Nkx2-2,Pcbd1,Pdlim1,Pou3f1,Prkcb,Psip1,Rbpms,Sall1,Sertad2,Sik1,Smarca2,Sox11,Sox4,Ss18,Tada1,Tbx20,Tcfap2a,Thrap3,Usp22,Wnt3a,Zmiz2
GO Molecular Function	GO:0050839	cell adhesion molecule binding	90	0.00233902	1	0.0845684	1.71019	19.8808	34	0.00946706	0.0161905	45	0.000242528	0.789187	0.0175375	2.53605	6.30903	16	45	0.00564374	0.355556	region_1038,region_1248,region_1654,region_1655,region_1666,region_1667,region_1861,region_1897,region_1898,region_1899,region_1956,region_1957,region_1958,region_1997,region_1998,region_2001,region_2002,region_2003,region_2004,region_2019,region_2087,region_631,region_659,region_660,region_661,region_662,region_695,region_701,region_702,region_703,region_704,region_705,region_706,region_866	Cadm1,Cdh13,Cpe,Ctnna1,Ctnnal1,Ctnnb1,Fert2,Fgfr1,Grin2a,Grin2b,Mllt4,Nlgn1,Nptn,Nrxn1,Pvrl1,Tbc1d2
GO Molecular Function	GO:0016462	pyrophosphatase activity	91	0.00237359	1	0.0848753	1.26555	117.736	149	0.0560647	0.0709524	642	0.199482	1	1	1.0807	101.786	110	726	0.0388007	0.151515	region_100,region_1026,region_1037,region_1039,region_1054,region_1055,region_1056,region_1057,region_1098,region_1099,region_1100,region_1101,region_1123,region_1154,region_1160,region_1161,region_1162,region_1169,region_117,region_1174,region_1205,region_1206,region_1207,region_1220,region_1221,region_1256,region_127,region_1272,region_1293,region_1299,region_1307,region_1308,region_1358,region…	2610528E23Rik,Abca13,Abca4,Abcb5,Abcc2,Abcc4,Abcg8,Arl4a,Atad2b,Atf7ip,Atl1,Atl2,Atp10a,Atp10d,Atp11b,Atp12a,Atp1b3,Atp6v1g3,Atp6v1h,Atp8a1,Bbs4,Btaf1,Ccnh,Cftr,Cgnl1,Chd1,Chd1l,Chd2,Chd6,Chd7,Chd9,D1Pas1,Ddx1,Ddx11,Ddx39,Ddx43,Ddx47,Ddx52,Ddx58,Dhx35,Diras2,Dync1i1,Dync2li1,Dynlrb1,Eef1a1,Enpp1,Enpp3,Entpd2,Gm266,Gna14,Gnao1,Gnas,Gnb3,Gspt1,Gtf2f2,Gtf2h2,Helb,Kif13b,Kif20b,Kif21a,Kif26a,Kif26b,K…
GO Molecular Function	GO:0032561	guanyl ribonucleotide binding	92	0.00250654	1	0.0886554	1.37665	61.7439	85	0.0294019	0.0404762	271	0.0581706	1	0.698476	1.20706	54.6783	66	390	0.0232804	0.169231	region_1019,region_1040,region_1084,region_1088,region_113,region_1138,region_1139,region_1140,region_1143,region_1154,region_1166,region_1225,region_1272,region_1299,region_1381,region_1382,region_1401,region_15,region_1503,region_1565,region_1570,region_1642,region_1643,region_1691,region_1711,region_1712,region_1806,region_1807,region_1823,region_1831,region_1914,region_192,region_1938,region_…	4930544G11Rik,5430435G22Rik,Arf1,Arfrp1,Arhgap5,Arl15,Arl4a,Arl4c,Arl8b,Atl1,Atl2,Cnga3,Diras2,Dnajc27,Dock1,Dock2,Dock4,Dock5,Dock7,Drg2,Eef1a1,Eif5,Gm266,Gmppb,Gna14,Gnao1,Gspt1,Gucy2c,Hhat,Lrrk2,Mmaa,Mocs1,Mras,Nmur2,Opa1,Pde11a,Prkg1,Prkg2,Rab1,Rab11a,Rab17,Rab23,Rab31,Rab39,Rab3c,Rab44,Rab5b,Rab7,Rala,Ralb,Rap1b,Rap2a,Rap2b,Rhobtb1,Rhoc,Rit2,Rnd2,Rnd3,Rnf112,Rngtt,Rragc,Rras2,Sept1,Sept11,Se…
GO Molecular Function	GO:0004972	N-methyl-D-aspartate selective glutamate receptor activity	93	0.00257712	1	0.0901713	3.18219	2.82824	9	0.00134678	0.00428571	89	0.00456447	1	0.166885	4.75509	0.841205	4	6	0.00141094	0.666667	region_1038,region_111,region_1659,region_701,region_702,region_703,region_704,region_705,region_706	Grin2a,Grin2b,Grin2c,Grin3a
GO Molecular Function	GO:0016788	hydrolase activity, acting on ester bonds	94	0.00265303	1	0.0918399	1.26387	116.309	147	0.0553853	0.07	188	0.0233066	1	0.403403	1.1922	97.2993	116	694	0.0409171	0.167147	region_1,region_1029,region_1035,region_1036,region_1069,region_1071,region_1072,region_1073,region_1087,region_1102,region_1126,region_1136,region_1137,region_1150,region_1151,region_1152,region_1157,region_1215,region_1249,region_1250,region_1274,region_128,region_1298,region_1312,region_1352,region_138,region_1401,region_1410,region_1415,region_1445,region_1449,region_1450,region_1451,region_1…	9630033F20Rik,Acpl2,Aen,Aoah,Arsj,Bpgm,C330005M16Rik,Cdc25b,Ces5a,Cnot6,Ctdspl,Dagla,Ddx1,Dis3,Drosha,Dupd1,Dusp10,Dusp16,Dusp26,Dusp4,Dusp6,Eif2c2,Enpp1,Enpp3,Enpp6,Epm2a,Ercc4,Eya1,Eya2,Eya3,Faah,Fbp1,Fbp2,Gde1,Gdpd4,Gm5136,Gpcpd1,Hibch,Inpp4b,Inpp5a,Inpp5d,Inpp5f,Lpin1,Minpp1,Mtmr10,Mtmr12,Mtmr2,Mtmr3,Napepld,Nceh1,Nt5c2,Nt5e,Nudt7,Parn,Pde11a,Pde1a,Pde1b,Pde6d,Pde8a,Pfkfb3,Phlpp1,Pla2g12b,Pla…
GO Molecular Function	GO:0042054	histone methyltransferase activity	95	0.00266542	1	0.0912976	2.25724	7.0883	16	0.00337538	0.00761905	158	0.018516	1	0.381337	1.90203	6.30903	12	45	0.0042328	0.266667	region_1205,region_1206,region_1207,region_1223,region_1361,region_1520,region_1521,region_1594,region_1793,region_1941,region_2072,region_312,region_632,region_73,region_952,region_953	Eed,Ehmt1,Ezh2,Mll5,Nsd1,Prdm9,Prmt7,Setd1b,Setd2,Smyd2,Smyd3,Suz12
GO Molecular Function	GO:0016410	N-acyltransferase activity	96	0.00267365	1	0.0906256	2.04303	9.78938	20	0.00466161	0.00952381	299	0.0875251	1	0.952531	1.40994	12.0573	17	86	0.00599647	0.197674	region_1070,region_1190,region_1392,region_1393,region_1397,region_1426,region_1482,region_1559,region_1569,region_1862,region_1863,region_1904,region_280,region_49,region_549,region_560,region_561,region_563,region_778,region_787	Cdyl,Clock,Elp4,Gnpnat1,Hgsnat,Keg1,Lass6,Mettl8,Myst4,Naa11,Naa30,Naa40,Nat3,Ncoa2,Ncoa3,Tada1,Usp22
GO Molecular Function	GO:0016896	exoribonuclease activity, producing 5'-phosphomonoesters	97	0.00289055	1	0.0969675	4.37316	1.372	6	0.000653336	0.00285714	301	0.0893486	1	0.965915	2.67474	1.12161	3	8	0.0010582	0.375	region_1464,region_1465,region_595,region_596,region_597,region_711	Dis3,Parn,Xrn2
GO Molecular Function	GO:0016279	protein-lysine N-methyltransferase activity	98	0.00309788	1	0.102862	2.37238	5.90125	14	0.00281012	0.00666667	206	0.0329101	1	0.519852	1.87701	5.32763	10	38	0.00352734	0.263158	region_1205,region_1206,region_1207,region_1223,region_1361,region_1520,region_1521,region_1594,region_2072,region_312,region_632,region_688,region_952,region_953	1700106N22Rik,Ehmt1,Ezh2,Mll5,Nsd1,Prdm9,Setd1b,Setd2,Smyd2,Smyd3
GO Molecular Function	GO:0004127	cytidylate kinase activity	99	0.00312307	1	0.102651	5.18853	0.963663	5	0.000458887	0.00238095	1114	0.453529	1	1	1.78316	0.560803	1	4	0.000352734	0.25	region_373,region_374,region_375,region_376,region_377	Cmpk2
GO Molecular Function	GO:0015631	tubulin binding	100	0.00315807	1	0.102764	1.63711	22.6008	37	0.0107623	0.0176191	71	0.00211017	1	0.0967113	1.73664	16.1231	28	115	0.00987654	0.243478	region_1019,region_1052,region_1085,region_1086,region_1138,region_1139,region_1140,region_1142,region_1153,region_1441,region_1442,region_1484,region_1485,region_1495,region_1588,region_1648,region_1753,region_1801,region_1940,region_2020,region_2043,region_21,region_266,region_316,region_340,region_446,region_487,region_488,region_489,region_521,region_666,region_687,region_88,region_916,region…	Adnp,Agtpbp1,Akap1,Arl4c,Arl8b,B4galt1,Bbs4,Bcl2l11,Ccdc88a,Clasp1,Clip3,Dst,Dync1i1,Kif26a,Lrpprc,Lrrk2,Mlph,Mtap1b,Myo5a,Ncald,ORF19,Rp1,Snca,Stim1,Tppp3,Trpv4,Vapb,Vps41
GO Molecular Function	GO:0005099	Ras GTPase activator activity	101	0.00322911	1	0.104035	1.66044	21.0787	35	0.0100375	0.0166667	104	0.00689117	1	0.215614	1.74169	12.0573	21	86	0.00740741	0.244186	region_1066,region_1067,region_1278,region_1279,region_1280,region_1371,region_1372,region_1375,region_1376,region_1462,region_1463,region_1540,region_1541,region_1542,region_1543,region_1544,region_1545,region_1654,region_1655,region_1788,region_1799,region_1909,region_1916,region_1998,region_2059,region_2089,region_246,region_29,region_30,region_330,region_386,region_72,region_757,region_959,re…	Arhgap10,Arhgap15,Chn2,Dab2ip,Dock2,Dock4,Iqgap1,Iqgap2,Nf1,Prex2,Ralgapa2,Rapgef2,Srgap1,Tbc1d1,Tbc1d2,Tbc1d23,Tbc1d25,Tbc1d2b,Tbc1d9,Thy1,Wnt11
GO Molecular Function	GO:0004458	D-lactate dehydrogenase (cytochrome) activity	102	0.00323832	1	0.103309	24.1728	0.0827376	2	3.93989e-05	0.000952381	385	0.140201	1	1	7.13263	0.140201	1	1	0.000352734	1	region_1947,region_1948	Ldhd
GO Molecular Function	GO:0008720	D-lactate dehydrogenase activity	102	0.00323832	1	0.103309	24.1728	0.0827376	2	3.93989e-05	0.000952381	385	0.140201	1	1	7.13263	0.140201	1	1	0.000352734	1	region_1947,region_1948	Ldhd
GO Molecular Function	GO:0008080	N-acetyltransferase activity	104	0.00334755	1	0.10474	2.14386	7.9296	17	0.003776	0.00809524	242	0.0528282	1	0.710342	1.55057	9.67385	15	69	0.005291	0.217391	region_1070,region_1190,region_1397,region_1426,region_1482,region_1559,region_1569,region_1862,region_1863,region_1904,region_280,region_49,region_549,region_560,region_561,region_563,region_778	Cdyl,Clock,Elp4,Gnpnat1,Hgsnat,Mettl8,Myst4,Naa11,Naa30,Naa40,Nat3,Ncoa2,Ncoa3,Tada1,Usp22
GO Molecular Function	GO:0016776	phosphotransferase activity, phosphate group as acceptor	105	0.00338325	1	0.104848	3.05153	2.94934	9	0.00140445	0.00428571	1306	0.59499	1	1	0.983811	4.06582	4	29	0.00141094	0.137931	region_2000,region_2069,region_2070,region_2071,region_373,region_374,region_375,region_376,region_377	Cmpk2,Dscaml1,Ip6k1,Ip6k2
GO Molecular Function	GO:0004674	protein serine/threonine kinase activity	106	0.00338657	1	0.103961	1.31911	78.0827	103	0.0371822	0.0490476	64	0.00155796	1	0.0792126	1.37039	60.5667	83	432	0.0292769	0.19213	region_0,region_102,region_105,region_1110,region_1111,region_1159,region_1165,region_1174,region_1216,region_1217,region_1227,region_1250,region_1287,region_1294,region_1312,region_1330,region_1342,region_1343,region_1344,region_1345,region_1351,region_1358,region_1385,region_1391,region_1395,region_1396,region_1397,region_1399,region_1403,region_1404,region_1405,region_144,region_1444,region_15…	Aak1,Acvr1,Akt2,B230120H23Rik,Bmp2k,Bmpr2,Camk1d,Camk1g,Camk2d,Ccnh,Cdc7,Cdk13,Cdk15,Cdk17,Cdk20,Cdk6,Cdkl1,Cdkl4,Csnk1g3,Csnk2a2,Dclk2,Dyrk2,Eef2k,Eif2ak2,Gtf2h2,Ick,Ikbke,Kalrn,Ksr1,Lats2,Limk2,Lmtk2,Lrrk2,Map2k6,Map3k7,Map4k3,Mapk10,Mark1,Mark2,Mast4,Myo3a,Myo3b,Nek10,Nek7,Nuak1,Pak1,Pim1,Pink1,Pkn2,Prkaa2,Prkab2,Prkca,Prkcb,Prkce,Prkch,Prkcq,Prkg1,Prkg2,Prkx,Ripk2,Rock1,Rps6ka4,Rps6ka5,Sgk1,S…
GO Molecular Function	GO:0004532	exoribonuclease activity	107	0.00363366	1	0.110504	4.17093	1.43853	6	0.000685014	0.00285714	362	0.120518	1	1	2.37754	1.26181	3	9	0.0010582	0.333333	region_1464,region_1465,region_595,region_596,region_597,region_711	Dis3,Parn,Xrn2
GO Molecular Function	GO:0016817	hydrolase activity, acting on acid anhydrides	108	0.00367675	1	0.110779	1.249	120.096	150	0.0571885	0.0714286	710	0.245733	1	1	1.06557	104.169	111	743	0.0391534	0.149394	region_100,region_1026,region_1037,region_1039,region_1054,region_1055,region_1056,region_1057,region_1098,region_1099,region_1100,region_1101,region_1123,region_1154,region_1160,region_1161,region_1162,region_1169,region_117,region_1174,region_1205,region_1206,region_1207,region_1220,region_1221,region_1256,region_127,region_1272,region_1293,region_1299,region_1307,region_1308,region_1358,region…	2610528E23Rik,Abca13,Abca4,Abcb5,Abcc2,Abcc4,Abcg8,Arl4a,Atad2b,Atf7ip,Atl1,Atl2,Atp10a,Atp10d,Atp11b,Atp12a,Atp1b3,Atp6v1g3,Atp6v1h,Atp8a1,Bbs4,Btaf1,Ccnh,Cftr,Cgnl1,Chd1,Chd1l,Chd2,Chd6,Chd7,Chd9,D1Pas1,Ddx1,Ddx11,Ddx39,Ddx43,Ddx47,Ddx52,Ddx58,Dhx35,Diras2,Dync1i1,Dync2li1,Dynlrb1,Eef1a1,Enpp1,Enpp3,Entpd2,Gm266,Gna14,Gnao1,Gnas,Gnb3,Gspt1,Gtf2f2,Gtf2h2,Helb,Kif13b,Kif20b,Kif21a,Kif26a,Kif26b,K…
GO Molecular Function	GO:0018024	histone-lysine N-methyltransferase activity	109	0.00368385	1	0.109975	2.41544	5.38205	13	0.00256288	0.00619048	270	0.056253	1	0.677953	1.78316	5.04723	9	36	0.0031746	0.25	region_1205,region_1206,region_1207,region_1223,region_1361,region_1520,region_1521,region_1594,region_2072,region_312,region_632,region_952,region_953	Ehmt1,Ezh2,Mll5,Nsd1,Prdm9,Setd1b,Setd2,Smyd2,Smyd3
GO Molecular Function	GO:0004420	hydroxymethylglutaryl-CoA reductase (NADPH) activity	110	0.00378143	1	0.111862	9.82001	0.305499	3	0.000145476	0.00142857	385	0.140201	1	1	7.13263	0.140201	1	1	0.000352734	1	region_332,region_333,region_334	Hmgcr
GO Molecular Function	GO:0042282	hydroxymethylglutaryl-CoA reductase activity	110	0.00378143	1	0.111862	9.82001	0.305499	3	0.000145476	0.00142857	385	0.140201	1	1	7.13263	0.140201	1	1	0.000352734	1	region_332,region_333,region_334	Hmgcr
GO Molecular Function	GO:0015301	anion:anion antiporter activity	112	0.00384113	1	0.111599	2.63612	4.1728	11	0.00198705	0.00523809	202	0.0311268	1	0.501418	2.37754	2.52361	6	18	0.0021164	0.333333	region_1127,region_1128,region_1129,region_1130,region_1166,region_1167,region_117,region_1563,region_1630,region_1631,region_867	Slc26a11,Slc26a7,Slc26a9,Slc4a3,Slc4a4,Slc4a9
GO Molecular Function	GO:0016655	oxidoreductase activity, acting on NADH or NADPH, quinone or similar compound as acceptor	113	0.00399079	1	0.114921	3.58139	1.95455	7	0.000930738	0.00333333	1353	0.613474	1	1	0.972631	3.08442	3	22	0.0010582	0.136364	region_1340,region_1341,region_219,region_356,region_357,region_358,region_359	Cryz,Ndufa12,Ndufs4
GO Molecular Function	GO:0031849	olfactory receptor binding	114	0.00403523	1	0.115181	9.59257	0.312742	3	0.000148925	0.00142857	734	0.260751	1	1	3.56631	0.280402	1	2	0.000352734	0.5	region_719,region_720,region_721	Rtp1
GO Molecular Function	GO:0017124	SH3 domain binding	115	0.0042436	1	0.120076	1.5553	27.0044	42	0.0128592	0.02	53	0.000754552	1	0.0463266	1.8492	15.1417	28	108	0.00987654	0.259259	region_1137,region_1212,region_1213,region_1298,region_1394,region_1516,region_1517,region_1616,region_1719,region_1799,region_1829,region_1830,region_1831,region_1858,region_1859,region_1909,region_1972,region_1973,region_2060,region_2075,region_2076,region_2077,region_2078,region_268,region_269,region_38,region_386,region_417,region_438,region_439,region_440,region_503,region_509,region_623,reg…	Adam12,Adam19,Adam9,Arhgap10,Arhgap26,Arhgap42,Asap1,Baiap2l1,Cttnbp2,Dock1,Dock4,Elmo1,Enah,Evl,Fut8,Inpp5d,Khdrbs1,Lrp2,Mtss1,Pdcd6ip,Plscr1,Plscr2,Prkce,Ptpn12,Ptpn22,Qk,Synj1,Uvrag
GO Molecular Function	GO:0051018	protein kinase A binding	116	0.00433894	1	0.121715	2.36741	5.49123	13	0.00261487	0.00619048	96	0.00534817	1	0.181281	3.29198	1.82261	6	13	0.0021164	0.461539	region_107,region_108,region_109,region_110,region_149,region_150,region_151,region_152,region_1668,region_594,region_661,region_662,region_88	Akap1,Akap11,Akap2,Akap7,Pja2,Sox9
GO Molecular Function	GO:0004063	aryldialkylphosphatase activity	117	0.0043974	1	0.1223	9.29907	0.322613	3	0.000153625	0.00142857	734	0.260751	1	1	3.56631	0.280402	1	2	0.000352734	0.5	region_912,region_913,region_914	Pon1
GO Molecular Function	GO:0003723	RNA binding	118	0.00448519	1	0.123685	1.24388	118.982	148	0.0566582	0.0704762	927	0.350134	1	1	1.03764	106.973	111	763	0.0391534	0.145478	region_1037,region_1047,region_1048,region_1049,region_1050,region_1053,region_1074,region_1098,region_1099,region_1100,region_1107,region_1111,region_1120,region_113,region_1135,region_114,region_1199,region_1213,region_1220,region_1221,region_1255,region_1256,region_1271,region_1281,region_1299,region_13,region_1303,region_1313,region_1326,region_1327,region_1328,region_1340,region_1341,region_…	1110034B05Rik,Aco1,Adad2,Adat1,Akap1,Ankhd1,Atxn1,Auh,Bard1,Bicc1,Brca1,C1d,Caprin2,Carhsp1,Celf4,Cnot6,Cpeb3,Cryz,Cstf2t,D1Pas1,Dcp2,Ddx1,Ddx11,Ddx43,Ddx47,Ddx52,Ddx58,Dis3,Dlx2,Dppa5a,Drosha,Eef1a1,Eef2k,Eif2ak2,Eif2c2,Eif3c,Eif3k,Eif4e,Eif5,Elavl2,Fars2,Fbll1,Gspt1,Hnrnpd,Khdrbs1,Krr1,Larp4b,Larp7,Lrpprc,Lsm6,Mbnl1,Mbnl2,Mex3b,Mov10,Mphosph6,Msi1,Msi2,Ncl,Nolc1,Nop58,Npm1,Nsun2,Nufip1,Obfc2a,P…
GO Molecular Function	GO:0008138	protein tyrosine/serine/threonine phosphatase activity	119	0.00448838	1	0.122733	2.08001	8.17304	17	0.00389192	0.00809524	123	0.0106056	1	0.280575	2.03789	5.88843	12	42	0.0042328	0.285714	region_1035,region_1036,region_1215,region_128,region_1642,region_1643,region_1719,region_1720,region_1721,region_1725,region_1867,region_1868,region_1872,region_229,region_304,region_549,region_813	Dupd1,Dusp10,Dusp16,Dusp26,Dusp4,Dusp6,Epm2a,Eya3,Pten,Ptp4a2,Ptpdc1,Rngtt
GO Molecular Function	GO:0000832	inositol hexakisphosphate 5-kinase activity	120	0.00450728	1	0.122222	9.21632	0.325509	3	0.000155004	0.00142857	567	0.147006	1	0.843662	2.85305	0.701004	2	5	0.000705467	0.4	region_2069,region_2070,region_2071	Ip6k1,Ip6k2
GO Molecular Function	GO:0052723	inositol hexakisphosphate 1-kinase activity	120	0.00450728	1	0.122222	9.21632	0.325509	3	0.000155004	0.00142857	567	0.147006	1	0.843662	2.85305	0.701004	2	5	0.000705467	0.4	region_2069,region_2070,region_2071	Ip6k1,Ip6k2
GO Molecular Function	GO:0052724	inositol hexakisphosphate 3-kinase activity	120	0.00450728	1	0.122222	9.21632	0.325509	3	0.000155004	0.00142857	567	0.147006	1	0.843662	2.85305	0.701004	2	5	0.000705467	0.4	region_2069,region_2070,region_2071	Ip6k1,Ip6k2
GO Molecular Function	GO:0005083	small GTPase regulator activity	123	0.00456287	1	0.120712	1.37996	52.8999	73	0.0251904	0.0347619	79	0.00305145	1	0.125689	1.47468	33.2276	49	237	0.0172839	0.206751	region_1027,region_1066,region_1067,region_123,region_124,region_1250,region_1272,region_1275,region_1278,region_1279,region_1280,region_1301,region_1360,region_1371,region_1372,region_1375,region_1376,region_1399,region_1403,region_1404,region_1405,region_1462,region_1463,region_1540,region_1541,region_1542,region_1543,region_1544,region_1545,region_1611,region_1654,region_1655,region_1736,regio…	Acap2,Agfg2,Arfgap3,Arhgap10,Arhgap15,Arhgef10,Arhgef10l,Arhgef19,Arhgef26,Arhgef3,Asap1,Chn2,Dab2ip,Dnmbp,Dock2,Dock4,Farp1,Fgd2,Fgd4,Fgd6,Iqgap1,Iqgap2,Kalrn,Lekr1,Map4k3,Nf1,Plekhg1,Plekhg6,Prex2,Psd3,Psd4,Ralgapa2,Rapgef2,Rapgef4,Rapgef5,Rgnef,Srgap1,Tbc1d1,Tbc1d2,Tbc1d23,Tbc1d25,Tbc1d2b,Tbc1d9,Thy1,Tiam1,Tnik,Ttn,Vav3,Wnt11
GO Molecular Function	GO:0004725	protein tyrosine phosphatase activity	124	0.00458235	1	0.12025	1.55728	26.3279	41	0.0125371	0.0195238	40	0.000159694	0.519643	0.0129911	2.01731	13.8799	28	99	0.00987654	0.282828	region_1,region_1035,region_1036,region_1071,region_1072,region_1073,region_1087,region_1157,region_1215,region_128,region_1298,region_1445,region_1480,region_1481,region_1516,region_1517,region_156,region_1642,region_1643,region_1668,region_1719,region_1720,region_1721,region_1725,region_1832,region_1867,region_1868,region_1872,region_1974,region_229,region_239,region_304,region_447,region_448,r…	Cdc25b,Dupd1,Dusp10,Dusp16,Dusp26,Dusp4,Dusp6,Epm2a,Eya1,Eya2,Eya3,Mtmr2,Mtmr3,Pten,Ptp4a2,Ptpdc1,Ptpn12,Ptpn18,Ptpn2,Ptpn22,Ptpn3,Ptpn4,Ptprb,Ptpre,Ptprg,Ptprk,Ptprn2,Rngtt
GO Molecular Function	GO:0032266	phosphatidylinositol-3-phosphate binding	125	0.00487236	1	0.126837	2.88168	3.12317	9	0.00148723	0.00428571	1181	0.469711	1	1	1.29684	1.54221	2	11	0.000705467	0.181818	region_1406,region_1407,region_1408,region_1965,region_1966,region_1967,region_1968,region_1969,region_1970	Pard3,Sestd1
GO Molecular Function	GO:0003779	actin binding	126	0.00525011	1	0.135586	1.34479	60.976	82	0.0290362	0.0390476	94	0.0050695	1	0.175491	1.38498	43.322	60	309	0.021164	0.194175	region_101,region_1064,region_1085,region_1086,region_1098,region_1099,region_1100,region_1101,region_1125,region_1142,region_1212,region_1213,region_1283,region_129,region_130,region_131,region_132,region_1358,region_1384,region_1395,region_1459,region_15,region_152,region_153,region_1530,region_1550,region_1563,region_1564,region_1588,region_1616,region_1723,region_1724,region_1752,region_1798,…	4831426I19Rik,Abra,Actn4,Actr2,Add3,Baiap2l1,Cald1,Cap2,Ccdc88a,Clmn,Ctnna1,Daam1,Dst,Dstn,Enah,Enc1,Epb4.1,Epb4.1l2,Epb4.1l3,Evl,Fert2,Fgd4,Fhdc1,Fhod3,Fmnl2,Gc,Klhl2,Limch1,Mkl2,Mlph,Mtap1b,Mtss1,Myl4,Myo1b,Myo3a,Myo3b,Myo5a,Myo7a,Ncald,ORF19,Parvb,Parvg,Pawr,Pstpip1,Shroom3,Sntg1,Spire1,Syne2,Tln2,Tmod2,Tmod3,Tns1,Tpm1,Trpv4,Twf1,Utrn,Vcl,Vill,Xirp1,Ywhah
GO Molecular Function	GO:0004987	kappa-opioid receptor activity	127	0.00527623	1	0.135188	5.85584	0.683079	4	0.000325276	0.00190476	385	0.140201	1	1	7.13263	0.140201	1	1	0.000352734	1	region_1054,region_1055,region_1056,region_1057	Oprk1
GO Molecular Function	GO:0016779	nucleotidyltransferase activity	128	0.00564004	1	0.14338	1.74235	14.9224	26	0.0071059	0.0123809	933	0.359512	1	1	1.10679	16.2633	18	116	0.00634921	0.155172	region_1082,region_1083,region_1089,region_1177,region_1178,region_1179,region_1320,region_1321,region_1403,region_1404,region_1405,region_1574,region_163,region_1642,region_1643,region_1816,region_1817,region_202,region_2034,region_2035,region_204,region_2069,region_2095,region_510,region_62,region_864	Cds1,Chrac1,Gmppb,Grinl1a,Nmnat2,Papss1,Pcyt1b,Pola1,Polr2a,Polr2d,Polr2e,Polr3b,Polr3e,Prim2,Rev1,Rev3l,Rngtt,Ttn
GO Molecular Function	GO:0004003	ATP-dependent DNA helicase activity	129	0.0057256	1	0.144427	2.80838	3.2047	9	0.00152604	0.00428571	630	0.186276	1	0.962129	1.62105	3.08442	5	22	0.00176367	0.227273	region_1123,region_1160,region_1161,region_1162,region_1503,region_244,region_245,region_667,region_668	Ddx11,Helb,Mcm6,Rtel1,Xrcc5
GO Molecular Function	GO:0016741	transferase activity, transferring one-carbon groups	130	0.00593267	1	0.148499	1.53251	26.7536	41	0.0127398	0.0195238	598	0.150298	1	0.817841	1.20826	25.6567	31	183	0.0109347	0.169399	region_1051,region_1060,region_1061,region_1062,region_1063,region_1118,region_1121,region_1205,region_1206,region_1207,region_1223,region_125,region_1311,region_1342,region_1359,region_1361,region_1397,region_1520,region_1521,region_1549,region_1594,region_1767,region_1793,region_1833,region_1834,region_1835,region_1836,region_1941,region_2072,region_312,region_32,region_322,region_341,region_63…	1700106N22Rik,4833442J19Rik,Aldh1l1,Atic,Eed,Ehmt1,Ezh2,Fam119a,Fbll1,Hnmt,Inmt,Mettl14,Mettl8,Mgmt,Mll5,Nsd1,Nsun2,Nsun7,Ocln,Pcmt1,Pcmtd1,Prdm9,Prmt3,Prmt7,Rnmtl1,Setd1b,Setd2,Smyd2,Smyd3,Suz12,Tyw3
GO Molecular Function	GO:0017089	glycolipid transporter activity	131	0.00596902	1	0.148269	17.6249	0.113476	2	5.40362e-05	0.000952381	317	0.0970323	1	0.996035	3.56631	0.560803	2	4	0.000705467	0.5	region_1588,region_961	Gltp,Plekha8
GO Molecular Function	GO:0016829	lyase activity	132	0.00602872	1	0.148617	1.53096	26.7806	41	0.0127527	0.0195238	137	0.0136787	1	0.324894	1.4711	22.4321	33	160	0.0116402	0.20625	region_10,region_1040,region_1041,region_1094,region_11,region_1123,region_1147,region_1148,region_1184,region_1238,region_1239,region_1240,region_1261,region_1414,region_1623,region_1647,region_1699,region_182,region_1962,region_2027,region_2079,region_2080,region_279,region_3,region_307,region_363,region_40,region_509,region_514,region_613,region_614,region_615,region_616,region_732,region_734,…	Accsl,Aco1,Adcy1,Adcy3,Adcy5,Adcy8,Adsl,Auh,Car1,Car12,Car13,Car2,Car5a,Car8,Clybl,Ddc,Dera,Echdc2,Gadl1,Gm5506,Gmds,Gucy2c,Ltc4s,Mgst2,Mocos,Pam,Pcbd1,Ptplb,Thnsl2,Tor3a,Umps,Uxs1,Xrcc5
GO Molecular Function	GO:0015019	heparan-alpha-glucosaminide N-acetyltransferase activity	133	0.00632673	1	0.154791	17.0997	0.116961	2	5.56957e-05	0.000952381	385	0.140201	1	1	7.13263	0.140201	1	1	0.000352734	1	region_1862,region_1863	Hgsnat
GO Molecular Function	GO:0008168	methyltransferase activity	134	0.00658233	1	0.159843	1.53135	26.1207	40	0.0124384	0.0190476	601	0.15417	1	0.834723	1.20892	24.8155	30	177	0.010582	0.169491	region_1051,region_1060,region_1061,region_1062,region_1063,region_1118,region_1205,region_1206,region_1207,region_1223,region_125,region_1311,region_1342,region_1359,region_1361,region_1397,region_1520,region_1521,region_1549,region_1594,region_1767,region_1793,region_1833,region_1834,region_1835,region_1836,region_1941,region_2072,region_312,region_32,region_322,region_341,region_632,region_68,…	1700106N22Rik,4833442J19Rik,Aldh1l1,Eed,Ehmt1,Ezh2,Fam119a,Fbll1,Hnmt,Inmt,Mettl14,Mettl8,Mgmt,Mll5,Nsd1,Nsun2,Nsun7,Ocln,Pcmt1,Pcmtd1,Prdm9,Prmt3,Prmt7,Rnmtl1,Setd1b,Setd2,Smyd2,Smyd3,Suz12,Tyw3
GO Molecular Function	GO:0030675	Rac GTPase activator activity	135	0.00740557	1	0.178502	2.69374	3.34109	9	0.00159099	0.00428571	154	0.0181449	1	0.383398	2.97193	1.68241	5	12	0.00176367	0.416667	region_1066,region_1067,region_1375,region_1376,region_29,region_30,region_386,region_959,region_960	Arhgap15,Chn2,Dock2,Dock4,Prex2
GO Molecular Function	GO:0045295	gamma-catenin binding	136	0.00781166	1	0.186906	2.38668	4.60891	11	0.00219472	0.00523809	147	0.0168522	1	0.373041	3.56631	1.12161	4	8	0.00141094	0.5	region_1316,region_1317,region_1318,region_659,region_660,region_661,region_662,region_853,region_854,region_855,region_866	Cdh2,Ctnna1,Fert2,Lef1
GO Molecular Function	GO:0016747	transferase activity, transferring acyl groups other than amino-acyl groups	137	0.00823	1	0.195477	1.55792	22.4658	35	0.010698	0.0166667	599	0.150477	1	0.81745	1.21674	23.8341	29	170	0.0102293	0.170588	region_1070,region_1190,region_1225,region_1281,region_1392,region_1393,region_1397,region_1426,region_1482,region_1559,region_1569,region_1862,region_1863,region_1880,region_1904,region_201,region_2046,region_233,region_234,region_277,region_280,region_350,region_371,region_399,region_49,region_549,region_560,region_561,region_563,region_628,region_629,region_630,region_778,region_787,region_836	1110002B05Rik,Agpat3,Agpat4,Cdyl,Clock,Elovl5,Elovl7,Elp4,Gnpnat1,Gpam,Hgsnat,Hhat,Keg1,Lass6,Lrat,Mboat1,Mboat2,Mettl8,Myst4,Naa11,Naa30,Naa40,Nat3,Ncoa2,Ncoa3,Tada1,Usp22,Zdhhc17,Zdhhc2
GO Molecular Function	GO:0017034	Rap guanyl-nucleotide exchange factor activity	138	0.00836361	1	0.197212	3.10895	2.25157	7	0.00107217	0.00333333	160	0.0196503	1	0.399638	7.13263	0.280402	2	2	0.000705467	1	region_1278,region_1279,region_1280,region_447,region_448,region_449,region_450	Rapgef2,Rapgef5
GO Molecular Function	GO:0016407	acetyltransferase activity	139	0.00839305	1	0.196482	1.94538	8.73864	17	0.00416126	0.00809524	622	0.180076	1	0.94207	1.28903	11.6367	15	83	0.005291	0.180723	region_1070,region_1190,region_1397,region_1426,region_1482,region_1559,region_1569,region_1862,region_1863,region_1904,region_280,region_49,region_549,region_560,region_561,region_563,region_778	Cdyl,Clock,Elp4,Gnpnat1,Hgsnat,Mettl8,Myst4,Naa11,Naa30,Naa40,Nat3,Ncoa2,Ncoa3,Tada1,Usp22
GO Molecular Function	GO:0004053	arginase activity	140	0.00866942	1	0.201502	7.25255	0.413648	3	0.000196975	0.00142857	734	0.260751	1	1	3.56631	0.280402	1	2	0.000352734	0.5	region_149,region_150,region_151	Arg1
GO Molecular Function	GO:0050512	lactosylceramide 4-alpha-galactosyltransferase activity	141	0.00907553	1	0.209445	14.1636	0.141207	2	6.72415e-05	0.000952381	385	0.140201	1	1	7.13263	0.140201	1	1	0.000352734	1	region_515,region_516	A4galt
GO Molecular Function	GO:0004686	elongation factor-2 kinase activity	142	0.00909042	1	0.208312	14.1514	0.141328	2	6.72993e-05	0.000952381	385	0.140201	1	1	7.13263	0.140201	1	1	0.000352734	1	region_1816,region_1817	Eef2k
GO Molecular Function	GO:0005522	profilin binding	143	0.00914529	1	0.208103	3.42495	1.75185	6	0.000834214	0.00285714	362	0.120518	1	1	2.37754	1.26181	3	9	0.0010582	0.333333	region_1212,region_1213,region_1513,region_438,region_439,region_440	Enah,Evl,Pclo
GO Molecular Function	GO:0016746	transferase activity, transferring acyl groups	144	0.00922172	1	0.208385	1.48187	28.3426	42	0.0134965	0.02	640	0.195692	1	0.994972	1.15664	31.1246	36	222	0.0126984	0.162162	region_1070,region_1190,region_1224,region_1225,region_1281,region_1392,region_1393,region_1397,region_1426,region_1482,region_1559,region_1569,region_1682,region_1862,region_1863,region_1880,region_1904,region_201,region_2046,region_229,region_233,region_234,region_277,region_280,region_350,region_371,region_399,region_49,region_549,region_560,region_561,region_563,region_621,region_628,region_6…	1110002B05Rik,Agpat3,Agpat4,Cdyl,Clock,Csl,Elovl5,Elovl7,Elp4,Esco1,Ggt6,Gnpnat1,Gpam,Hgsnat,Hhat,Keg1,Lass6,Lpgat1,Lrat,Mboat1,Mboat2,Mettl8,Myst4,Naa11,Naa30,Naa40,Nat3,Ncoa2,Ncoa3,Qpct,Tada1,Usp22,Zdhhc14,Zdhhc17,Zdhhc2,Zdhhc21
GO Molecular Function	GO:0004719	protein-L-isoaspartate (D-aspartate) O-methyltransferase activity	145	0.00928672	1	0.208407	3.97975	1.25636	5	0.000598267	0.00238095	243	0.0534443	1	0.715669	4.75509	0.420602	2	3	0.000705467	0.666667	region_1060,region_1061,region_1062,region_1063,region_125	Pcmt1,Pcmtd1
GO Molecular Function	GO:0046966	thyroid hormone receptor binding	146	0.00954362	1	0.212705	2.77345	2.88449	8	0.00137357	0.00380952	356	0.109039	1	0.996669	1.78316	3.36482	6	24	0.0021164	0.25	region_1714,region_2091,region_312,region_500,region_501,region_52,region_53,region_86	Med13,Med14,Med30,Ncor1,Nsd1,Thrap3
GO Molecular Function	GO:0004343	glucosamine 6-phosphate N-acetyltransferase activity	147	0.00956841	1	0.211807	13.776	0.14518	2	6.91336e-05	0.000952381	385	0.140201	1	1	7.13263	0.140201	1	1	0.000352734	1	region_560,region_561	Gnpnat1
GO Molecular Function	GO:0016833	oxo-acid-lyase activity	148	0.00977896	1	0.215005	4.88866	0.81822	4	0.000389629	0.00190476	1230	0.53016	1	1	1.42653	0.701004	1	5	0.000352734	0.2	region_613,region_614,region_615,region_616	Clybl
GO Molecular Function	GO:0005521	lamin binding	149	0.0101334	1	0.221303	3.89343	1.28422	5	0.000611531	0.00238095	644	0.200718	1	1	2.37754	0.841205	2	6	0.000705467	0.333333	region_1450,region_1451,region_1452,region_1453,region_583	Bnip3l,Plcb1
GO Molecular Function	GO:0070016	armadillo repeat domain binding	150	0.0102538	1	0.222438	3.33969	1.79658	6	0.000855512	0.00285714	301	0.0893486	1	0.965915	2.67474	1.12161	3	8	0.0010582	0.375	region_103,region_104,region_1316,region_1317,region_1318,region_396	Axin2,Lef1,Strn3
GO Molecular Function	GO:0005088	Ras guanyl-nucleotide exchange factor activity	151	0.0103117	1	0.222214	1.54355	22.0271	34	0.0104891	0.0161905	78	0.00304842	1	0.127174	1.80275	12.7583	23	91	0.00811288	0.252747	region_1027,region_1066,region_1067,region_123,region_124,region_1272,region_1275,region_1278,region_1279,region_1280,region_1301,region_1399,region_1403,region_1404,region_1405,region_1736,region_1737,region_1851,region_218,region_29,region_30,region_337,region_338,region_447,region_448,region_449,region_450,region_555,region_612,region_639,region_712,region_732,region_769,region_824	Arhgef10,Arhgef10l,Arhgef19,Arhgef26,Arhgef3,Dnmbp,Dock2,Farp1,Fgd2,Fgd4,Fgd6,Kalrn,Lekr1,Plekhg1,Plekhg6,Prex2,Rapgef2,Rapgef4,Rapgef5,Rgnef,Tiam1,Ttn,Vav3
GO Molecular Function	GO:0008301	DNA bending activity	152	0.0103405	1	0.221368	1.67448	14.93	25	0.00710953	0.0119048	84	0.00411909	1	0.159566	2.05749	7.29044	15	52	0.005291	0.288461	region_1008,region_1009,region_1010,region_1011,region_1262,region_1263,region_1264,region_1316,region_1317,region_1318,region_1613,region_1614,region_1692,region_1702,region_1707,region_1708,region_1709,region_1710,region_2032,region_279,region_28,region_339,region_428,region_693,region_974	Foxb1,Foxc1,Foxd1,Foxd2,Foxd3,Foxi1,Foxi3,Foxj3,Foxk1,Foxn2,Foxn3,Foxo1,Foxo6,Foxp1,Lef1
GO Molecular Function	GO:0008170	N-methyltransferase activity	153	0.01058	1	0.225015	1.89605	8.96603	17	0.00426954	0.00809524	265	0.0553959	1	0.680219	1.59869	8.13165	13	58	0.00458554	0.224138	region_1205,region_1206,region_1207,region_1223,region_1359,region_1361,region_1520,region_1521,region_1594,region_1767,region_1941,region_2072,region_312,region_632,region_688,region_952,region_953	1700106N22Rik,Ehmt1,Ezh2,Hnmt,Mll5,Nsd1,Prdm9,Prmt3,Prmt7,Setd1b,Setd2,Smyd2,Smyd3
GO Molecular Function	GO:0004222	metalloendopeptidase activity	154	0.0106124	1	0.224238	1.49219	26.1361	39	0.0124458	0.0185714	615	0.165399	1	0.875134	1.24821	16.8241	21	120	0.00740741	0.175	region_1000,region_1001,region_1002,region_1273,region_1274,region_1519,region_1684,region_1685,region_1700,region_1829,region_1830,region_1858,region_1859,region_1896,region_1897,region_1898,region_1899,region_1936,region_1937,region_1951,region_1971,region_2021,region_2022,region_250,region_253,region_254,region_323,region_38,region_575,region_576,region_577,region_647,region_730,region_731,reg…	Adam12,Adam19,Adam32,Adam9,Adamts16,Adamts18,Adamts9,Adamtsl1,Lmln,Mep1a,Mipep,Mme,Mmp2,Mmp7,Nrd1,Pitrm1,Pmpcb,Thsd4,Tll1,Tll2,Xrcc6bp1
GO Molecular Function	GO:0003690	double-stranded DNA binding	155	0.0108005	1	0.226741	1.42152	34.4701	49	0.0164143	0.0233333	59	0.00114868	1	0.0633526	1.72912	18.5065	32	132	0.0112875	0.242424	region_1008,region_1009,region_1010,region_1011,region_1117,region_1118,region_1123,region_1202,region_1262,region_1263,region_1264,region_1409,region_1613,region_1614,region_1647,region_1680,region_1681,region_1682,region_1692,region_1702,region_1707,region_1708,region_1709,region_1710,region_184,region_1909,region_1942,region_2024,region_2032,region_2087,region_2095,region_253,region_254,region…	Aim2,Creb1,Ctnnb1,Ddx58,Foxb1,Foxc1,Foxd1,Foxd2,Foxd3,Foxi1,Foxi3,Foxj3,Foxk1,Foxn2,Foxn3,Foxo1,Foxo6,Foxp1,Gata6,Klf6,Msh2,Msh6,Myc,Neurod1,Neurog3,Nfib,Nr3c2,Pola1,Smad2,Smad3,Terf2,Xrcc5
GO Molecular Function	GO:0030234	enzyme regulator activity	156	0.0113049	1	0.235808	1.18103	158.337	187	0.0753985	0.0890476	195	0.0268126	1	0.447427	1.16999	115.385	135	823	0.0476191	0.164034	region_1020,region_1022,region_1027,region_103,region_104,region_1053,region_1066,region_1067,region_1068,region_1075,region_1136,region_1142,region_1165,region_1185,region_1186,region_1187,region_1203,region_1216,region_1217,region_122,region_1228,region_123,region_124,region_1250,region_1261,region_1272,region_1275,region_1278,region_1279,region_1280,region_1282,region_1301,region_1307,region_1…	4930474N05Rik,A830018L16Rik,Acap2,Agfg2,Angptl3,Anxa2,Anxa3,Arfgap3,Arhgap10,Arhgap15,Arhgap18,Arhgap21,Arhgap24,Arhgap25,Arhgap26,Arhgap28,Arhgap29,Arhgap32,Arhgap42,Arhgap5,Arhgef10,Arhgef10l,Arhgef19,Arhgef26,Arhgef3,Asap1,Axin2,Bcar3,Bmp2k,Cabyr,Cd46,Chn2,Col28a1,Col6a3,Cst10,Cyb5b,Dab2ip,Dapp1,Depdc1b,Dgki,Dis3,Dnmbp,Dock1,Dock2,Dock4,Dock5,Dock7,Efcab10,Elp2,Elp4,Fam13b,Farp1,Fgd2,Fgd4,Fgd6…
GO Molecular Function	GO:0034236	protein kinase A catalytic subunit binding	157	0.0114296	1	0.236892	2.92252	2.39519	7	0.00114057	0.00333333	117	0.00985627	1	0.274122	5.34947	0.560803	3	4	0.0010582	0.75	region_107,region_108,region_109,region_110,region_594,region_661,region_662	Akap11,Pja2,Sox9
GO Molecular Function	GO:0016491	oxidoreductase activity	158	0.0114925	1	0.236687	1.21937	111.533	136	0.0531112	0.0647619	662	0.200997	1	0.987981	1.07896	104.73	113	747	0.0398589	0.151272	region_1026,region_1074,region_1107,region_1108,region_1122,region_1147,region_1148,region_1192,region_1208,region_1209,region_1210,region_1211,region_1212,region_1214,region_123,region_124,region_1244,region_1261,region_1303,region_1317,region_1318,region_1319,region_1322,region_1340,region_1341,region_1373,region_1394,region_1410,region_1414,region_144,region_147,region_1483,region_1506,region_…	1110034B05Rik,1810063B05Rik,Akr1b3,Akr1d1,Aldh1a2,Aldh1a3,Aldh1l1,Aldh3a1,Aldh5a1,Aldh7a1,Aldh8a1,Alkbh3,Aox3,Aox4,Bckdhb,Bdh1,Coil,Coq7,Cox10,Cox6a1,Cox8b,Cryz,Ctbp2,Cyb5r3,Cyp19a1,Cyp1b1,Cyp26a1,Cyp26b1,Cyp2c44,Cyp2c70,Cyp2u1,Cyp39a1,Cyp46a1,Cyp51,Cyp7b1,Degs1,Degs2,Dhrs3,Dhrs7,Dhrs9,Dpyd,Egln3,Enox1,Far1,Fto,Gapdh,Glrx5,Gm6756,Gpx4,Haao,Hadh,Hhipl1,Hibadh,Hmgcr,Hpd,Hsd17b14,Hsdl2,Htatip2,Ido2,…
GO Molecular Function	GO:0070273	phosphatidylinositol-4-phosphate binding	159	0.0115896	1	0.237185	4.64692	0.860784	4	0.000409897	0.00190476	317	0.0970323	1	0.996035	3.56631	0.560803	2	4	0.000705467	0.5	region_1406,region_1407,region_1408,region_332	Col4a3bp,Sestd1
GO Molecular Function	GO:0051998	protein carboxyl O-methyltransferase activity	160	0.0122079	1	0.248278	3.71386	1.34631	5	0.000641099	0.00238095	567	0.147006	1	0.843662	2.85305	0.701004	2	5	0.000705467	0.4	region_1060,region_1061,region_1062,region_1063,region_125	Pcmt1,Pcmtd1
GO Molecular Function	GO:0008135	translation factor activity, nucleic acid binding	161	0.0124749	1	0.252132	1.79095	10.6089	19	0.00505187	0.00904762	1568	0.896204	1	1	0.727819	13.7397	10	98	0.00352734	0.102041	region_1053,region_1326,region_1327,region_1328,region_1752,region_1816,region_1817,region_1821,region_2051,region_373,region_374,region_375,region_376,region_377,region_378,region_444,region_445,region_675,region_707	Eef1a1,Eef2k,Eif2ak2,Eif3c,Eif3k,Eif4e,Eif5,Gspt1,Sox11,Tcea1
GO Molecular Function	GO:0046625	sphingolipid binding	162	0.0125251	1	0.251585	2.63934	3.03106	8	0.00144336	0.00380952	128	0.0119446	1	0.303655	3.2421	1.54221	5	11	0.00176367	0.454545	region_1180,region_1181,region_1182,region_1753,region_332,region_379,region_669,region_670	Clip3,Col4a3bp,Lama1,Lamb1,Lamc1
GO Molecular Function	GO:0004582	dolichyl-phosphate beta-D-mannosyltransferase activity	163	0.0129579	1	0.258681	11.7404	0.170352	2	8.11202e-05	0.000952381	317	0.0970323	1	0.996035	3.56631	0.560803	2	4	0.000705467	0.5	region_1484,region_1485	Adnp,Dpm1
GO Molecular Function	GO:0004364	glutathione transferase activity	164	0.0141181	1	0.280124	3.10901	1.92987	6	0.000918987	0.00285714	932	0.355086	1	1	1.27368	3.92562	5	28	0.00176367	0.178571	region_1079,region_1192,region_1261,region_2047,region_2048,region_2049	Gsta2,Gsta3,Gsta4,Mgst2,Mgst3
GO Molecular Function	GO:0008486	diphosphoinositol-polyphosphate diphosphatase activity	165	0.0146933	1	0.28977	4.32546	0.924756	4	0.00044036	0.00190476	1114	0.453529	1	1	1.78316	0.560803	1	4	0.000352734	0.25	region_221,region_222,region_223,region_224	Nudt4
GO Molecular Function	GO:0004058	aromatic-L-amino-acid decarboxylase activity	166	0.0147675	1	0.289478	10.9535	0.18259	2	8.69477e-05	0.000952381	385	0.140201	1	1	7.13263	0.140201	1	1	0.000352734	1	region_10,region_11	Ddc
GO Molecular Function	GO:0035594	ganglioside binding	167	0.0149332	1	0.290975	66.4637	0.0150458	1	7.16467e-06	0.00047619	385	0.140201	1	1	7.13263	0.140201	1	1	0.000352734	1	region_1753	Clip3
GO Molecular Function	GO:0070008	serine-type exopeptidase activity	168	0.0150359	1	0.291231	3.52027	1.42035	5	0.000676355	0.00238095	301	0.0893486	1	0.965915	2.67474	1.12161	3	8	0.0010582	0.375	region_1553,region_171,region_172,region_173,region_89	Corin,Prep,Scpep1
GO Molecular Function	GO:0047131	saccharopine dehydrogenase (NAD+, L-glutamate-forming) activity	169	0.0152172	1	0.292998	5.87144	0.510948	3	0.000243309	0.00142857	734	0.260751	1	1	3.56631	0.280402	1	2	0.000352734	0.5	region_1208,region_1209,region_1210	Sccpdh
GO Molecular Function	GO:0051400	BH domain binding	170	0.0153189	1	0.293221	4.27086	0.936581	4	0.000445991	0.00190476	1056	0.366373	1	1	1.58503	1.26181	2	9	0.000705467	0.222222	region_1144,region_1150,region_1151,region_1152	Bcl2,Bok
GO Molecular Function	GO:0033754	indoleamine 2,3-dioxygenase activity	171	0.0156973	1	0.298708	10.6031	0.188624	2	8.98209e-05	0.000952381	734	0.260751	1	1	3.56631	0.280402	1	2	0.000352734	0.5	region_1856,region_1857	Ido2
GO Molecular Function	GO:0015106	bicarbonate transmembrane transporter activity	172	0.0158693	1	0.300224	4.22504	0.946735	4	0.000450826	0.00190476	160	0.0196503	1	0.399638	7.13263	0.280402	2	2	0.000705467	1	region_1166,region_1167,region_1630,region_1631	Slc26a7,Slc26a9
GO Molecular Function	GO:0042284	sphingolipid delta-4 desaturase activity	173	0.0160557	1	0.301995	10.4763	0.190907	2	9.09082e-05	0.000952381	385	0.140201	1	1	7.13263	0.140201	1	1	0.000352734	1	region_440,region_441	Degs2
GO Molecular Function	GO:0000170	sphingosine hydroxylase activity	173	0.0160557	1	0.301995	10.4763	0.190907	2	9.09082e-05	0.000952381	385	0.140201	1	1	7.13263	0.140201	1	1	0.000352734	1	region_440,region_441	Degs2
GO Molecular Function	GO:0005085	guanyl-nucleotide exchange factor activity	175	0.0160808	1	0.299011	1.36804	38.7416	53	0.0184484	0.0252381	81	0.00335188	1	0.134655	1.5753	22.8527	36	163	0.0126984	0.220859	region_1027,region_1066,region_1067,region_1185,region_1186,region_1187,region_123,region_124,region_1272,region_1275,region_1278,region_1279,region_1280,region_1301,region_1309,region_1310,region_1360,region_1365,region_1366,region_1399,region_1403,region_1404,region_1405,region_1691,region_1736,region_1737,region_1831,region_1851,region_1904,region_1905,region_205,region_218,region_29,region_30…	4930474N05Rik,Arhgef10,Arhgef10l,Arhgef19,Arhgef26,Arhgef3,Bcar3,Dis3,Dnmbp,Dock1,Dock2,Dock4,Dock5,Dock7,Farp1,Fgd2,Fgd4,Fgd6,Kalrn,Lekr1,Plekhg1,Plekhg6,Prex2,Psd3,Psd4,Ralgps1,Ralgps2,Rapgef1,Rapgef2,Rapgef4,Rapgef5,Rgnef,Ric8b,Tiam1,Ttn,Vav3
GO Molecular Function	GO:0005105	type 1 fibroblast growth factor receptor binding	176	0.016099	1	0.297648	5.74672	0.522037	3	0.000248589	0.00142857	117	0.00985627	1	0.274122	5.34947	0.560803	3	4	0.0010582	0.75	region_1029,region_2019,region_26	Fgf18,Fgf23,Nptn
GO Molecular Function	GO:0015280	ligand-gated sodium channel activity	177	0.0164728	1	0.302838	4.17703	0.957618	4	0.000456009	0.00190476	1374	0.652699	1	1	1.01895	0.981406	1	7	0.000352734	0.142857	region_74,region_75,region_76,region_77	Accn1
GO Molecular Function	GO:0004796	thromboxane-A synthase activity	178	0.0165203	1	0.302006	10.318	0.193836	2	9.23028e-05	0.000952381	385	0.140201	1	1	7.13263	0.140201	1	1	0.000352734	1	region_947,region_948	Tbxas1
GO Molecular Function	GO:0070513	death domain binding	179	0.0166662	1	0.30297	2.99361	2.00427	6	0.000954412	0.00285714	301	0.0893486	1	0.965915	2.67474	1.12161	3	8	0.0010582	0.375	region_1150,region_1151,region_1152,region_220,region_480,region_481	Bcl2,Cradd,Dap
GO Molecular Function	GO:0004721	phosphoprotein phosphatase activity	180	0.0167645	1	0.303066	1.38855	34.5683	48	0.0164611	0.0228571	111	0.00855752	1	0.250866	1.51856	21.7311	33	155	0.0116402	0.212903	region_1,region_1035,region_1036,region_1071,region_1072,region_1073,region_1087,region_1150,region_1151,region_1152,region_1157,region_1215,region_128,region_1298,region_1445,region_1480,region_1481,region_1516,region_1517,region_1529,region_156,region_1642,region_1643,region_1668,region_1719,region_1720,region_1721,region_1725,region_1832,region_1867,region_1868,region_1872,region_1974,region_2…	Cdc25b,Ctdspl,Dupd1,Dusp10,Dusp16,Dusp26,Dusp4,Dusp6,Epm2a,Eya1,Eya2,Eya3,Mtmr2,Mtmr3,Phlpp1,Ppm1a,Ppp1cb,Ppp1r3c,Pten,Ptp4a2,Ptpdc1,Ptpn12,Ptpn18,Ptpn2,Ptpn22,Ptpn3,Ptpn4,Ptprb,Ptpre,Ptprg,Ptprk,Ptprn2,Rngtt
GO Molecular Function	GO:0004726	non-membrane spanning protein tyrosine phosphatase activity	181	0.0168182	1	0.302355	5.65152	0.53083	3	0.000252776	0.00142857	181	0.0220722	1	0.396812	4.27958	0.701004	3	5	0.0010582	0.6	region_1087,region_1157,region_894	Ptpn18,Ptpn2,Ptpn4
GO Molecular Function	GO:0022804	active transmembrane transporter activity	182	0.0168491	1	0.301248	1.29266	58.0198	75	0.0276285	0.0357143	272	0.0589595	1	0.705347	1.22976	44.724	55	319	0.0194004	0.172414	region_1024,region_1041,region_1054,region_1055,region_1056,region_1057,region_1127,region_1128,region_1129,region_1130,region_1166,region_1167,region_117,region_1174,region_1254,region_1256,region_1260,region_1302,region_1307,region_1308,region_1446,region_1447,region_1448,region_1501,region_1530,region_1535,region_1552,region_1553,region_1563,region_1598,region_16,region_1618,region_1630,region…	Abca4,Abcb5,Abcc2,Abcc4,Ank,Atp10a,Atp10d,Atp11b,Atp12a,Atp1b3,Atp6v1g3,Atp6v1h,Atp8a1,Cftr,Clcn3,Nat3,Serinc1,Slc10a7,Slc15a3,Slc15a4,Slc15a5,Slc16a7,Slc16a9,Slc1a3,Slc1a4,Slc20a2,Slc23a2,Slc25a13,Slc25a18,Slc26a11,Slc26a4,Slc26a7,Slc26a9,Slc28a1,Slc34a2,Slc35a3,Slc38a2,Slc3a2,Slc44a1,Slc45a1,Slc47a1,Slc4a3,Slc4a4,Slc4a9,Slc5a1,Slc7a1,Slc7a11,Slc7a14,Slc7a5,Slc7a7,Slc7a9,Slc8a1,Slc9a9,Slco4a1,To…
GO Molecular Function	GO:0000175	3'-5'-exoribonuclease activity	183	0.0177119	1	0.314943	4.08494	0.979206	4	0.000466288	0.00190476	644	0.200718	1	1	2.37754	0.841205	2	6	0.000705467	0.333333	region_595,region_596,region_597,region_711	Dis3,Parn
GO Molecular Function	GO:0047485	protein N-terminus binding	184	0.0178914	1	0.316406	1.56173	17.2886	27	0.00823264	0.0128571	157	0.0183552	1	0.380431	1.66737	10.7955	18	77	0.00634921	0.233766	region_118,region_1183,region_119,region_1218,region_1219,region_1245,region_1246,region_1247,region_1371,region_1372,region_1415,region_1416,region_1455,region_1482,region_1536,region_1537,region_1743,region_1752,region_1939,region_278,region_563,region_690,region_708,region_709,region_710,region_938,region_97	Actn4,Cacna1e,Calm2,Chmp6,Csnk2a2,Dab2ip,Ercc4,Exoc2,Exoc4,Exoc5,Ncoa3,Pex14,Rbpj,Rnd2,Snap25,Tbl1xr1,Tgfb2,Traf6
GO Molecular Function	GO:0016836	hydro-lyase activity	185	0.0181533	1	0.319303	1.90797	7.33764	14	0.00349411	0.00666667	134	0.012878	1	0.312724	1.9905	6.02863	12	43	0.0042328	0.27907	region_1184,region_1238,region_1239,region_1240,region_1623,region_1647,region_182,region_1962,region_2027,region_279,region_307,region_877,region_878,region_879	Aco1,Auh,Car1,Car12,Car13,Car2,Car5a,Car8,Gm5506,Gmds,Pcbd1,Tor3a
GO Molecular Function	GO:0000400	four-way junction DNA binding	186	0.0185281	1	0.324142	5.44541	0.550922	3	0.000262344	0.00142857	181	0.0220722	1	0.396812	4.27958	0.701004	3	5	0.0010582	0.6	region_441,region_691,region_692	Msh2,Msh6,Yy1
GO Molecular Function	GO:0005104	fibroblast growth factor receptor binding	187	0.0186994	1	0.325389	2.18727	4.57191	10	0.0021771	0.00476191	99	0.00565663	1	0.185926	2.93696	2.38341	7	17	0.00246914	0.411765	region_1029,region_1619,region_1845,region_2019,region_26,region_571,region_572,region_573,region_574,region_869	Fgf1,Fgf15,Fgf18,Fgf23,Fgf9,Kl,Nptn
GO Molecular Function	GO:0004515	nicotinate-nucleotide adenylyltransferase activity	188	0.0197371	1	0.341619	5.31435	0.56451	3	0.000268814	0.00142857	935	0.364405	1	1	2.37754	0.420602	1	3	0.000352734	0.333333	region_1177,region_1178,region_1179	Nmnat2
GO Molecular Function	GO:0000309	nicotinamide-nucleotide adenylyltransferase activity	188	0.0197371	1	0.341619	5.31435	0.56451	3	0.000268814	0.00142857	935	0.364405	1	1	2.37754	0.420602	1	3	0.000352734	0.333333	region_1177,region_1178,region_1179	Nmnat2
GO Molecular Function	GO:0030348	syntaxin-3 binding	190	0.0200123	1	0.342736	49.4679	0.0202151	1	9.62625e-06	0.00047619	385	0.140201	1	1	7.13263	0.140201	1	1	0.000352734	1	region_1846	Stxbp2
GO Molecular Function	GO:0030347	syntaxin-2 binding	190	0.0200123	1	0.342736	49.4679	0.0202151	1	9.62625e-06	0.00047619	385	0.140201	1	1	7.13263	0.140201	1	1	0.000352734	1	region_1846	Stxbp2
GO Molecular Function	GO:0003697	single-stranded DNA binding	192	0.0201854	1	0.342101	1.88099	7.44289	14	0.00354423	0.00666667	1102	0.425139	1	1	1.11884	7.15024	8	51	0.00282187	0.156863	region_1098,region_1099,region_1100,region_1160,region_1161,region_1162,region_1199,region_327,region_66,region_687,region_691,region_708,region_709,region_710	Ercc4,Lrpprc,Mcm6,Msh2,Obfc2a,Refbp2,Rpa1,Ssbp2
GO Molecular Function	GO:0003828	alpha-N-acetylneuraminate alpha-2,8-sialyltransferase activity	193	0.020551	1	0.346493	2.59104	2.70161	7	0.00128648	0.00333333	181	0.0220722	1	0.396812	4.27958	0.701004	3	5	0.0010582	0.6	region_1042,region_1043,region_1044,region_1145,region_888,region_889,region_890	St8sia1,St8sia3,St8sia4
GO Molecular Function	GO:0000976	transcription regulatory region sequence-specific DNA binding	194	0.0205541	1	0.344759	1.39748	30.7697	43	0.0146522	0.0204762	31	2.85038e-05	0.0927512	0.00299198	2.23931	12.0573	27	86	0.00952381	0.313953	region_1025,region_107,region_108,region_109,region_110,region_1215,region_1331,region_1332,region_1349,region_1360,region_1398,region_1425,region_1426,region_1494,region_1501,region_1551,region_1560,region_1766,region_1911,region_1926,region_1927,region_1982,region_1991,region_1992,region_1995,region_2056,region_275,region_276,region_285,region_286,region_373,region_374,region_375,region_376,reg…	Barx2,Dbx1,Dlx2,Emx2,Esrrb,Fezf1,Fezf2,Fli1,Gata3,Gata5,Hlx,Lmo4,Nanogpd,Pax6,Pax8,Phox2b,Pou4f2,Rest,Sall1,Sox11,Sox4,Sox9,Tbx18,Tbx20,Tcf4,Tcfap2a,Tcfap2c
GO Molecular Function	GO:0030151	molybdenum ion binding	195	0.0206538	1	0.344654	5.22186	0.574508	3	0.000273575	0.00142857	213	0.0395799	1	0.604663	3.56631	0.841205	3	6	0.0010582	0.5	region_1108,region_252,region_858	Aox3,Mocos,Suox
GO Molecular Function	GO:0008603	cAMP-dependent protein kinase regulator activity	196	0.0209391	1	0.347632	2.39563	3.33942	8	0.0015902	0.00380952	152	0.0171817	1	0.367823	2.67474	2.24321	6	16	0.0021164	0.375	region_1067,region_1068,region_1399,region_2070,region_2071,region_383,region_733,region_848	A830018L16Rik,Cabyr,Efcab10,Prkar2a,Rapgef4,Ropn1
GO Molecular Function	GO:0004859	phospholipase inhibitor activity	197	0.0210512	1	0.347719	2.83586	2.11576	6	0.0010075	0.00285714	280	0.0621625	1	0.722417	3.05684	0.981406	3	7	0.0010582	0.428571	region_1566,region_1567,region_1568,region_1691,region_2031,region_2032	Angptl3,Anxa2,Anxa3
GO Molecular Function	GO:0070410	co-SMAD binding	198	0.0216565	1	0.355911	2.38007	3.36125	8	0.0016006	0.00380952	48	0.000433334	1	0.0293764	4.75509	1.26181	6	9	0.0021164	0.666667	region_1425,region_1426,region_2024,region_2091,region_673,region_898,region_899,region_900	Pax6,Smad2,Smad3,Smad6,Tgif1,Usp9x
GO Molecular Function	GO:0008137	NADH dehydrogenase (ubiquinone) activity	199	0.0216615	1	0.354204	3.19858	1.56319	5	0.000744378	0.00238095	1476	0.767793	1	1	0.750803	2.66382	2	19	0.000705467	0.105263	region_219,region_356,region_357,region_358,region_359	Ndufa12,Ndufs4
GO Molecular Function	GO:0022839	ion gated channel activity	200	0.022481	1	0.365767	1.85367	7.55258	14	0.00359647	0.00666667	98	0.00547518	1	0.181798	2.71719	2.94422	8	21	0.00282187	0.380952	region_1175,region_1254,region_1844,region_1862,region_1863,region_239,region_240,region_45,region_550,region_551,region_74,region_75,region_76,region_77	Accn1,Ano1,Kcnma1,Kcnmb2,Kcnmb4,Kcnt2,Kcnu1,Nmur2
GO Molecular Function	GO:0055102	lipase inhibitor activity	201	0.0224906	1	0.364102	2.79215	2.14888	6	0.00102328	0.00285714	634	0.192017	1	0.985528	1.94526	1.54221	3	11	0.0010582	0.272727	region_1566,region_1567,region_1568,region_1691,region_2031,region_2032	Angptl3,Anxa2,Anxa3
GO Molecular Function	GO:0001664	G-protein-coupled receptor binding	202	0.0225987	1	0.364041	1.39411	30.1267	42	0.014346	0.02	1206	0.489896	1	1	1.01895	26.4979	27	189	0.00952381	0.142857	region_100,region_1012,region_1013,region_1014,region_1015,region_1038,region_1271,region_1496,region_1497,region_1550,region_1709,region_1799,region_1803,region_1855,region_1864,region_1938,region_2039,region_2066,region_23,region_24,region_265,region_308,region_309,region_362,region_434,region_47,region_556,region_719,region_720,region_721,region_78,region_79,region_792,region_793,region_80,reg…	Adm,Adra2a,Adrb3,Bambi,Bdkrb2,Ccl2,Edn2,Edn3,Gna14,Gnao1,Gnas,Grin2b,Nedd4,Nsg2,P2ry1,Pomc,Prok2,Rala,Ror2,Rtp1,Ryk,Sfrp1,Uchl1,Wnt11,Wnt3,Wnt3a,Wnt5a
GO Molecular Function	GO:0008139	nuclear localization sequence binding	203	0.022787	1	0.365266	8.68098	0.230389	2	0.000109709	0.000952381	243	0.0534443	1	0.715669	4.75509	0.420602	2	3	0.000705467	0.666667	region_400,region_827	Nfkbia,Nolc1
GO Molecular Function	GO:0016620	oxidoreductase activity, acting on the aldehyde or oxo group of donors, NAD or NADP as acceptor	204	0.0234883	1	0.374661	2.02114	5.44249	11	0.00259166	0.00523809	95	0.00516054	1	0.176762	2.30762	4.76683	11	34	0.00388007	0.323529	region_144,region_1766,region_1776,region_1805,region_2,region_20,region_2034,region_274,region_49,region_885,region_995	Aldh1a2,Aldh1a3,Aldh1l1,Aldh3a1,Aldh5a1,Aldh7a1,Aldh8a1,Far1,Gapdh,Htatip2,Ogdh
GO Molecular Function	GO:0032947	protein complex scaffold	205	0.0235538	1	0.373873	2.10444	4.75185	10	0.00226279	0.00476191	672	0.213167	1	1	1.47572	4.06582	6	29	0.0021164	0.206897	region_149,region_150,region_151,region_152,region_1728,region_594,region_728,region_729,region_88,region_937	Akap1,Akap11,Akap7,Chchd3,Dlg1,Ldlrap1
GO Molecular Function	GO:0034416	bisphosphoglycerate phosphatase activity	206	0.0238828	1	0.377256	4.935	0.607902	3	0.000289477	0.00142857	317	0.0970323	1	0.996035	3.56631	0.560803	2	4	0.000705467	0.5	region_811,region_812,region_940	Bpgm,Minpp1
GO Molecular Function	GO:0004833	tryptophan 2,3-dioxygenase activity	207	0.0239127	1	0.375903	8.45736	0.236481	2	0.00011261	0.000952381	935	0.364405	1	1	2.37754	0.420602	1	3	0.000352734	0.333333	region_1856,region_1857	Ido2
GO Molecular Function	GO:0008172	S-methyltransferase activity	208	0.0244824	1	0.383008	3.09545	1.61528	5	0.000769179	0.00238095	644	0.200718	1	1	2.37754	0.841205	2	6	0.000705467	0.333333	region_1833,region_1834,region_1835,region_1836,region_341	Mgmt,Ocln
GO Molecular Function	GO:0004066	asparagine synthase (glutamine-hydrolyzing) activity	209	0.0249748	1	0.388841	4.84942	0.618631	3	0.000294586	0.00142857	734	0.260751	1	1	3.56631	0.280402	1	2	0.000352734	0.5	region_919,region_920,region_921	Asns
GO Molecular Function	GO:0004457	lactate dehydrogenase activity	210	0.0250238	1	0.38775	4.84569	0.619107	3	0.000294813	0.00142857	567	0.147006	1	0.843662	2.85305	0.701004	2	5	0.000705467	0.4	region_1947,region_1948,region_620	Ldhal6b,Ldhd
GO Molecular Function	GO:0016209	antioxidant activity	211	0.0250872	1	0.38689	1.99995	5.50014	11	0.00261911	0.00523809	627	0.185135	1	0.960813	1.37166	7.29044	10	52	0.00352734	0.192308	region_1192,region_123,region_124,region_1261,region_1373,region_1410,region_202,region_40,region_664,region_68,region_769	Gpx4,Iyd,Ltc4s,Mgst2,Mgst3,Nxn,Prdx6-rs1-ps,Ptgs1,Sod1,Txndc2
GO Molecular Function	GO:0051434	BH3 domain binding	212	0.0252928	1	0.388221	4.82542	0.621708	3	0.000296051	0.00142857	1114	0.453529	1	1	1.78316	0.560803	1	4	0.000352734	0.25	region_1150,region_1151,region_1152	Bcl2
GO Molecular Function	GO:0008237	metallopeptidase activity	213	0.0261102	1	0.398886	1.32735	39.9291	53	0.0190138	0.0252381	237	0.0499343	1	0.685596	1.32086	26.4979	35	189	0.0123457	0.185185	region_1000,region_1001,region_1002,region_1065,region_1066,region_1273,region_1274,region_1314,region_1496,region_1519,region_1675,region_1684,region_1685,region_1700,region_1755,region_1787,region_1829,region_1830,region_1858,region_1859,region_1896,region_1897,region_1898,region_1899,region_1936,region_1937,region_1951,region_1971,region_2021,region_2022,region_216,region_232,region_250,region…	Adam12,Adam19,Adam32,Adam9,Adamts16,Adamts18,Adamts9,Adamtsl1,Agtpbp1,Anpep,Cops5,Cpa6,Cpe,Enpep,Ermp1,Gm5136,Lmln,Lnpep,Lta4h,Mep1a,Mipep,Mme,Mmp2,Mmp7,Npepl1,Nrd1,Pappa,Pepd,Pitrm1,Pmpcb,Thsd4,Tll1,Tll2,Xpnpep1,Xrcc6bp1
GO Molecular Function	GO:0003954	NADH dehydrogenase activity	214	0.0266201	1	0.404775	3.02622	1.65222	5	0.000786773	0.00238095	1500	0.792425	1	1	0.713263	2.80402	2	20	0.000705467	0.1	region_219,region_356,region_357,region_358,region_359	Ndufa12,Ndufs4
GO Molecular Function	GO:0003705	sequence-specific distal enhancer binding RNA polymerase II transcription factor activity	215	0.0267035	1	0.404154	1.41696	25.4066	36	0.0120984	0.0171429	50	0.00046829	1	0.0304763	2.01392	11.9171	24	85	0.00846561	0.282353	region_1007,region_1008,region_1009,region_1010,region_1011,region_107,region_108,region_109,region_110,region_1117,region_1118,region_1223,region_1262,region_1263,region_1264,region_1501,region_1613,region_1614,region_1692,region_1702,region_1707,region_1708,region_1709,region_1710,region_2032,region_279,region_28,region_339,region_414,region_428,region_579,region_688,region_693,region_847,regio…	Creb1,Foxb1,Foxc1,Foxd1,Foxd2,Foxd3,Foxi1,Foxi3,Foxj3,Foxk1,Foxn2,Foxn3,Foxo1,Foxo6,Foxp1,Gata5,Gata6,Hif1a,Hnf1b,Mitf,Prox1,Six3,Sox7,Sox9
GO Molecular Function	GO:0001105	RNA polymerase II transcription coactivator activity	216	0.026779	1	0.40342	1.67097	10.7722	18	0.00512962	0.00857143	25	8.65408e-06	0.0281604	0.00112641	4.93797	1.82261	9	13	0.0031746	0.692308	region_134,region_1683,region_1711,region_1712,region_1926,region_1927,region_1982,region_275,region_276,region_285,region_286,region_373,region_374,region_375,region_376,region_377,region_378,region_803	Cited2,Pou3f1,Psip1,Sall1,Smarca2,Sox11,Sox4,Tbx20,Tcfap2a
GO Molecular Function	GO:0005516	calmodulin binding	217	0.0270601	1	0.405776	1.3597	33.0956	45	0.0157598	0.0214286	141	0.0149384	1	0.344748	1.52842	17.6653	27	126	0.00952381	0.214286	region_1098,region_1099,region_1100,region_1101,region_1222,region_1225,region_1227,region_1312,region_1343,region_1344,region_1345,region_1358,region_1403,region_1404,region_1405,region_1410,region_1450,region_1451,region_1452,region_1453,region_1588,region_1788,region_1798,region_1816,region_1817,region_1918,region_2043,region_3,region_330,region_342,region_343,region_363,region_396,region_533,…	Adcy1,Adcy3,Add3,Cacna1a,Cald1,Camk1d,Camk1g,Camk2d,Eef2k,Esrrg,Gap43,Iqgap1,Iqgap2,Kcnh1,Myo1b,Myo3a,Myo5a,Myo7a,Pde1a,Pde1b,Pik3r1,Plcb1,Rit2,Slc8a1,Strn3,Trpv4,Ttn
GO Molecular Function	GO:0060072	large conductance calcium-activated potassium channel activity	218	0.0276649	1	0.412942	3.55245	1.12598	4	0.000536183	0.00190476	160	0.0196503	1	0.399638	7.13263	0.280402	2	2	0.000705467	1	region_1862,region_1863,region_550,region_551	Kcnma1,Kcnu1
GO Molecular Function	GO:0004169	dolichyl-phosphate-mannose-protein mannosyltransferase activity	219	0.0277931	1	0.412963	7.7934	0.256628	2	0.000122204	0.000952381	317	0.0970323	1	0.996035	3.56631	0.560803	2	4	0.000705467	0.5	region_1484,region_1485	Adnp,Dpm1
GO Molecular Function	GO:0033842	N-acetyl-beta-glucosaminyl-glycoprotein 4-beta-N-acetylgalactosaminyltransferase activity	220	0.0279001	1	0.412668	7.77708	0.257166	2	0.00012246	0.000952381	160	0.0196503	1	0.399638	7.13263	0.280402	2	2	0.000705467	1	region_1023,region_1840	B4galnt3,B4galnt4
GO Molecular Function	GO:0019201	nucleotide kinase activity	221	0.0284107	1	0.418318	2.97311	1.68174	5	0.000800829	0.00238095	1542	0.859755	1	1	0.548664	1.82261	1	13	0.000352734	0.0769231	region_373,region_374,region_375,region_376,region_377	Cmpk2
GO Molecular Function	GO:0008106	alcohol dehydrogenase (NADP+) activity	222	0.0285445	1	0.418396	3.51714	1.13729	4	0.000541566	0.00190476	218	0.0401114	1	0.598728	2.85305	1.40201	4	10	0.00141094	0.4	region_1074,region_1742,region_49,region_939	Akr1b3,Aldh3a1,Dhrs3,Rdh10
GO Molecular Function	GO:0016835	carbon-oxygen lyase activity	223	0.028618	1	0.417592	1.71694	9.31892	16	0.00443758	0.00761905	201	0.0309593	1	0.501202	1.69249	8.27185	14	59	0.00493827	0.237288	region_1123,region_1184,region_1238,region_1239,region_1240,region_1623,region_1647,region_182,region_1962,region_2027,region_279,region_307,region_877,region_878,region_879,region_974	Aco1,Auh,Car1,Car12,Car13,Car2,Car5a,Car8,Gm5506,Gmds,Pcbd1,Thnsl2,Tor3a,Xrcc5
GO Molecular Function	GO:0004540	ribonuclease activity	224	0.028949	1	0.420536	1.83605	7.08042	13	0.00337163	0.00619048	1405	0.69098	1	1	0.891579	8.97285	8	64	0.00282187	0.125	region_1464,region_1465,region_280,region_475,region_476,region_510,region_511,region_566,region_567,region_595,region_596,region_597,region_711	Dis3,Drosha,Eif2c2,Parn,Rnase1,Rnase10,Rpp40,Xrn2
GO Molecular Function	GO:0030618	transforming growth factor beta receptor, pathway-specific cytoplasmic mediator activity	225	0.0290183	1	0.419669	3.49867	1.14329	4	0.000544424	0.00190476	160	0.0196503	1	0.399638	7.13263	0.280402	2	2	0.000705467	1	region_2024,region_898,region_899,region_900	Smad2,Smad3
GO Molecular Function	GO:0042623	ATPase activity, coupled	226	0.0291595	1	0.419845	1.30712	42.8423	56	0.0204011	0.0266667	709	0.244516	1	1	1.11884	35.7512	40	255	0.0141093	0.156863	region_100,region_1037,region_1054,region_1055,region_1056,region_1057,region_1123,region_1160,region_1161,region_1162,region_1174,region_1220,region_1221,region_1256,region_1307,region_1308,region_1358,region_1474,region_1477,region_1478,region_1503,region_1552,region_1553,region_1647,region_1756,region_1770,region_1771,region_185,region_1877,region_1878,region_1879,region_1917,region_1921,regio…	2610528E23Rik,Abca4,Abcb5,Abcc2,Abcc4,Atp10a,Atp10d,Atp11b,Atp12a,Atp1b3,Atp6v1g3,Atp6v1h,Atp8a1,Ccnh,Cftr,Chd6,D1Pas1,Ddx1,Ddx11,Ddx39,Ddx43,Ddx47,Ddx52,Ddx58,Dhx35,Gtf2f2,Gtf2h2,Helb,Lonp2,Lonrf1,Mcm6,Msh2,Msh6,Myo3a,Nsf,Rad51l1,Rtel1,Supv3l1,Tdrd12,Xrcc5
GO Molecular Function	GO:0008094	DNA-dependent ATPase activity	227	0.0292717	1	0.419604	1.74698	8.58624	15	0.00408869	0.00714286	713	0.253698	1	1	1.27368	7.85124	10	56	0.00352734	0.178571	region_1123,region_1160,region_1161,region_1162,region_1503,region_244,region_245,region_325,region_341,region_418,region_419,region_667,region_668,region_691,region_692	Ccnh,Ddx11,Gtf2h2,Helb,Mcm6,Msh2,Msh6,Rad51l1,Rtel1,Xrcc5
GO Molecular Function	GO:0005126	cytokine receptor binding	228	0.0295201	1	0.421309	1.37877	29.0113	40	0.0138149	0.0190476	1111	0.441616	1	1	1.03943	27.9	29	199	0.0102293	0.145729	region_1028,region_1218,region_1219,region_1230,region_1249,region_1276,region_1277,region_1297,region_1300,region_1437,region_1578,region_1579,region_1622,region_1644,region_1915,region_2024,region_220,region_230,region_231,region_242,region_44,region_460,region_461,region_462,region_463,region_497,region_593,region_594,region_62,region_649,region_658,region_78,region_787,region_79,region_80,reg…	Angpt1,BC096441,Ccl2,Cntf,Csf1,Ebi3,Gdnf,Ifng,Ifnk,Il12a,Il15,Il4,Il7,Jak2,Kitl,Lifr,Ngf,Nsmaf,Ntf3,Smad2,Smad3,Smad6,Socs2,Spred1,Tgfb2,Tgfbr3,Tnfsf10,Tnfsf11,Vegfa
GO Molecular Function	GO:0070568	guanylyltransferase activity	229	0.0297073	1	0.422129	4.52876	0.662434	3	0.000315445	0.00142857	317	0.0970323	1	0.996035	3.56631	0.560803	2	4	0.000705467	0.5	region_1642,region_1643,region_2069	Gmppb,Rngtt
GO Molecular Function	GO:0043023	ribosomal large subunit binding	230	0.0301699	1	0.426839	32.6433	0.0306342	1	1.45877e-05	0.00047619	385	0.140201	1	1	7.13263	0.140201	1	1	0.000352734	1	region_2089	Rbm3
GO Molecular Function	GO:0051010	microtubule plus-end binding	231	0.0301859	1	0.425216	2.60261	2.30538	6	0.0010978	0.00285714	154	0.0181449	1	0.383398	2.97193	1.68241	5	12	0.00176367	0.416667	region_1085,region_1086,region_1142,region_1153,region_1801,region_2043	Clasp1,Dst,Mlph,Myo5a,Stim1
GO Molecular Function	GO:0008526	phosphatidylinositol transporter activity	232	0.0303259	1	0.425347	4.49186	0.667875	3	0.000318036	0.00142857	734	0.260751	1	1	3.56631	0.280402	1	2	0.000352734	0.5	region_1582,region_1583,region_1584	Pitpnb
GO Molecular Function	GO:0016796	exonuclease activity, active with either ribo- or deoxyribonucleic acids and producing 5'-phosphomonoesters	233	0.0303368	1	0.423673	2.59946	2.30817	6	0.00109913	0.00285714	1105	0.433414	1	1	1.2587	2.38341	3	17	0.0010582	0.176471	region_1464,region_1465,region_595,region_596,region_597,region_711	Dis3,Parn,Xrn2
GO Molecular Function	GO:0051019	mitogen-activated protein kinase binding	234	0.0305048	1	0.424199	2.3804	2.94068	7	0.00140033	0.00333333	679	0.230944	1	1	1.78316	1.68241	3	12	0.0010582	0.25	region_1450,region_1451,region_1452,region_1453,region_1454,region_188,region_777	Plcb4,Rps6ka4,Sirt1
GO Molecular Function	GO:0003908	methylated-DNA-[protein]-cysteine S-methyltransferase activity	235	0.0307344	1	0.425574	3.43478	1.16456	4	0.000554552	0.00190476	385	0.140201	1	1	7.13263	0.140201	1	1	0.000352734	1	region_1833,region_1834,region_1835,region_1836	Mgmt
GO Molecular Function	GO:0070551	endoribonuclease activity, cleaving siRNA-paired mRNA	236	0.0308079	1	0.424784	7.3665	0.271499	2	0.000129285	0.000952381	385	0.140201	1	1	7.13263	0.140201	1	1	0.000352734	1	region_510,region_511	Eif2c2
GO Molecular Function	GO:0008026	ATP-dependent helicase activity	237	0.0309721	1	0.425246	1.52427	15.7453	24	0.00749775	0.0114286	663	0.201066	1	0.98683	1.23449	14.5809	18	104	0.00634921	0.173077	region_1037,region_1123,region_1160,region_1161,region_1162,region_1220,region_1221,region_1474,region_1477,region_1478,region_1503,region_1647,region_1756,region_185,region_1917,region_2050,region_244,region_245,region_368,region_588,region_667,region_668,region_758,region_85	2610528E23Rik,Chd6,D1Pas1,Ddx1,Ddx11,Ddx39,Ddx43,Ddx47,Ddx52,Ddx58,Dhx35,Gtf2f2,Helb,Mcm6,Rtel1,Supv3l1,Tdrd12,Xrcc5
GO Molecular Function	GO:0004985	opioid receptor activity	238	0.0316386	1	0.432572	2.88665	1.73211	5	0.000824814	0.00238095	567	0.147006	1	0.843662	2.85305	0.701004	2	5	0.000705467	0.4	region_1054,region_1055,region_1056,region_1057,region_122	Oprk1,Oprm1
GO Molecular Function	GO:0051117	ATPase binding	239	0.0322885	1	0.43961	1.99306	5.0174	10	0.00238924	0.00476191	919	0.338833	1	1	1.3586	2.94422	4	21	0.00141094	0.190476	region_1174,region_1668,region_342,region_343,region_701,region_702,region_703,region_704,region_705,region_706	Atp6v1g3,Grin2a,Pik3r1,Ptpn3
GO Molecular Function	GO:0031690	adrenergic receptor binding	240	0.0324055	1	0.439365	2.86763	1.7436	5	0.000830285	0.00238095	147	0.0168522	1	0.373041	3.56631	1.12161	4	8	0.00141094	0.5	region_1550,region_1864,region_2039,region_835,region_836	Adra2a,Adrb3,Nedd4,Uchl1
GO Molecular Function	GO:0003960	NADPH:quinone reductase activity	241	0.0336528	1	0.454382	7.01737	0.285007	2	0.000135718	0.000952381	734	0.260751	1	1	3.56631	0.280402	1	2	0.000352734	0.5	region_1340,region_1341	Cryz
GO Molecular Function	GO:0035612	AP-2 adaptor complex binding	242	0.0340174	1	0.457408	6.97581	0.286705	2	0.000136526	0.000952381	160	0.0196503	1	0.399638	7.13263	0.280402	2	2	0.000705467	1	region_1728,region_990	Aak1,Ldlrap1
GO Molecular Function	GO:0045523	interleukin-27 receptor binding	243	0.0345184	1	0.462234	28.4673	0.035128	1	1.67276e-05	0.00047619	734	0.260751	1	1	3.56631	0.280402	1	2	0.000352734	0.5	region_658	Ebi3
GO Molecular Function	GO:0019706	protein-cysteine S-palmitoleyltransferase activity	244	0.0346042	1	0.461484	6.91031	0.289423	2	0.00013782	0.000952381	734	0.260751	1	1	3.56631	0.280402	1	2	0.000352734	0.5	region_233,region_234	Zdhhc17
GO Molecular Function	GO:0047568	3-oxo-5-beta-steroid 4-dehydrogenase activity	245	0.0348221	1	0.462495	6.8864	0.290427	2	0.000138299	0.000952381	385	0.140201	1	1	7.13263	0.140201	1	1	0.000352734	1	region_944,region_945	Akr1d1
GO Molecular Function	GO:0047787	delta4-3-oxosteroid 5beta-reductase activity	245	0.0348221	1	0.462495	6.8864	0.290427	2	0.000138299	0.000952381	385	0.140201	1	1	7.13263	0.140201	1	1	0.000352734	1	region_944,region_945	Akr1d1
GO Molecular Function	GO:0016595	glutamate binding	247	0.0352644	1	0.464576	2.04959	4.39113	9	0.00209101	0.00428571	115	0.00946992	1	0.267958	4.07579	0.981406	4	7	0.00141094	0.571429	region_1020,region_2046,region_464,region_701,region_702,region_703,region_704,region_705,region_706	Gclc,Grin2a,Grm7,Slc1a3
GO Molecular Function	GO:0008171	O-methyltransferase activity	248	0.0355537	1	0.466499	2.79477	1.78906	5	0.000851933	0.00238095	1181	0.469711	1	1	1.29684	1.54221	2	11	0.000705467	0.181818	region_1060,region_1061,region_1062,region_1063,region_125	Pcmt1,Pcmtd1
GO Molecular Function	GO:0008482	sulfite oxidase activity	249	0.0356882	1	0.466383	27.5177	0.0363403	1	1.73049e-05	0.00047619	385	0.140201	1	1	7.13263	0.140201	1	1	0.000352734	1	region_252	Suox
GO Molecular Function	GO:0016884	carbon-nitrogen ligase activity, with glutamine as amido-N-donor	250	0.0358919	1	0.467169	2.78739	1.79379	5	0.000854187	0.00238095	362	0.120518	1	1	2.37754	1.26181	3	9	0.0010582	0.333333	region_1285,region_1703,region_919,region_920,region_921	Asns,Faah,Pet112l
GO Molecular Function	GO:0004089	carbonate dehydratase activity	251	0.0359754	1	0.46639	2.49324	2.40651	6	0.00114595	0.00285714	130	0.0121561	1	0.304277	2.85305	2.10301	6	15	0.0021164	0.4	region_1238,region_1239,region_1240,region_1623,region_1962,region_2027	Car1,Car12,Car13,Car2,Car5a,Car8
GO Molecular Function	GO:0070123	transforming growth factor beta receptor activity, type III	252	0.0360842	1	0.465945	6.75223	0.296198	2	0.000141047	0.000952381	385	0.140201	1	1	7.13263	0.140201	1	1	0.000352734	1	region_1578,region_1579	Tgfbr3
GO Molecular Function	GO:0051721	protein phosphatase 2A binding	253	0.0363543	1	0.467577	2.48679	2.41275	6	0.00114893	0.00285714	370	0.12145	1	1	2.03789	1.96281	4	14	0.00141094	0.285714	region_1150,region_1151,region_1152,region_1177,region_1659,region_396	Bcl2,Grin3a,Smg7,Strn3
GO Molecular Function	GO:0001104	RNA polymerase II transcription cofactor activity	254	0.0369563	1	0.473448	1.45846	18.5127	27	0.00881558	0.0128571	54	0.000824784	1	0.0497009	2.37754	6.30903	15	45	0.005291	0.333333	region_134,region_1591,region_1592,region_1593,region_1683,region_1711,region_1712,region_1714,region_1926,region_1927,region_1982,region_2056,region_2091,region_275,region_276,region_285,region_286,region_373,region_374,region_375,region_376,region_377,region_378,region_500,region_501,region_803,region_86	Cited2,Med13,Med13l,Med14,Med30,Pou3f1,Psip1,Sall1,Smarca2,Sox11,Sox4,Tbx18,Tbx20,Tcfap2a,Thrap3
GO Molecular Function	GO:0004394	heparan sulfate 2-O-sulfotransferase activity	255	0.0373603	1	0.476747	6.62353	0.301954	2	0.000143787	0.000952381	385	0.140201	1	1	7.13263	0.140201	1	1	0.000352734	1	region_1331,region_1332	Hs2st1
GO Molecular Function	GO:0005212	structural constituent of eye lens	256	0.0376956	1	0.479147	2.27126	3.08199	7	0.00146762	0.00333333	310	0.0921961	1	0.967761	1.86069	3.22462	6	23	0.0021164	0.26087	region_1353,region_1458,region_1585,region_1586,region_2067,region_642,region_718	Bfsp1,Bfsp2,Cryaa,Cryba4,Crygs,Vim
GO Molecular Function	GO:0015052	beta3-adrenergic receptor activity	257	0.0384576	1	0.486931	25.4996	0.0392163	1	1.86744e-05	0.00047619	385	0.140201	1	1	7.13263	0.140201	1	1	0.000352734	1	region_1864	Adrb3
GO Molecular Function	GO:0031699	beta-3 adrenergic receptor binding	257	0.0384576	1	0.486931	25.4996	0.0392163	1	1.86744e-05	0.00047619	385	0.140201	1	1	7.13263	0.140201	1	1	0.000352734	1	region_1864	Adrb3
GO Molecular Function	GO:0051020	GTPase binding	259	0.0384709	1	0.483337	1.3818	25.3292	35	0.0120615	0.0166667	288	0.0714744	1	0.807561	1.36709	16.8241	23	120	0.00811288	0.191667	region_100,region_1026,region_1142,region_1384,region_1399,region_1691,region_1732,region_1788,region_1831,region_2031,region_2032,region_246,region_278,region_29,region_30,region_301,region_386,region_406,region_407,region_408,region_409,region_410,region_492,region_493,region_548,region_585,region_659,region_660,region_661,region_662,region_67,region_845,region_943,region_98,region_99	Anxa2,Daam1,Dgki,Dock1,Dock2,Dock4,Dock5,Dock7,Exoc2,Fert2,Fmnl2,Gnb3,Iqgap1,Mlph,Nsf,Nup153,Rap1gap,Rapgef4,Rims2,Rock1,Rph3al,Srgap1,Vcl
GO Molecular Function	GO:0034417	bisphosphoglycerate 3-phosphatase activity	260	0.0386173	1	0.48331	6.50303	0.307549	2	0.000146452	0.000952381	385	0.140201	1	1	7.13263	0.140201	1	1	0.000352734	1	region_811,region_812	Minpp1
GO Molecular Function	GO:0030351	inositol-1,3,4,5,6-pentakisphosphate 3-phosphatase activity	260	0.0386173	1	0.48331	6.50303	0.307549	2	0.000146452	0.000952381	385	0.140201	1	1	7.13263	0.140201	1	1	0.000352734	1	region_811,region_812	Minpp1
GO Molecular Function	GO:0030352	inositol-1,4,5,6-tetrakisphosphate 6-phosphatase activity	260	0.0386173	1	0.48331	6.50303	0.307549	2	0.000146452	0.000952381	385	0.140201	1	1	7.13263	0.140201	1	1	0.000352734	1	region_811,region_812	Minpp1
GO Molecular Function	GO:0004446	inositol-hexakisphosphate phosphatase activity	260	0.0386173	1	0.48331	6.50303	0.307549	2	0.000146452	0.000952381	385	0.140201	1	1	7.13263	0.140201	1	1	0.000352734	1	region_811,region_812	Minpp1
GO Molecular Function	GO:0005089	Rho guanyl-nucleotide exchange factor activity	264	0.0400386	1	0.493506	1.45824	17.8297	26	0.00849033	0.0123809	82	0.00335505	1	0.133138	1.87701	10.6553	20	76	0.00705467	0.263158	region_1027,region_1066,region_1067,region_123,region_124,region_1272,region_1275,region_1301,region_1403,region_1404,region_1405,region_1736,region_1737,region_1851,region_218,region_29,region_30,region_337,region_338,region_555,region_612,region_639,region_712,region_732,region_769,region_824	Arhgef10,Arhgef10l,Arhgef19,Arhgef26,Arhgef3,Dnmbp,Dock2,Farp1,Fgd2,Fgd4,Fgd6,Kalrn,Lekr1,Plekhg1,Plekhg6,Prex2,Rgnef,Tiam1,Ttn,Vav3
GO Molecular Function	GO:0030145	manganese ion binding	265	0.0401055	1	0.492465	1.79516	6.68465	12	0.00318316	0.00571429	143	0.0153696	1	0.349739	2.09783	4.76683	10	34	0.00352734	0.294118	region_1184,region_149,region_1496,region_150,region_151,region_1755,region_1951,region_242,region_413,region_639,region_834,region_876	Abl2,Arg1,Dcp2,Dyrk2,Npepl1,Nudt7,Pepd,Pim1,Ppm1a,Xpnpep1
GO Molecular Function	GO:0016628	oxidoreductase activity, acting on the CH-CH group of donors, NAD or NADP as acceptor	266	0.0401102	1	0.490672	2.23971	3.12541	7	0.00148829	0.00333333	381	0.138001	1	1	1.78316	2.80402	5	20	0.00176367	0.25	region_1122,region_1211,region_1212,region_1303,region_422,region_944,region_945	Akr1d1,Dpyd,Lbr,Pecr,Ptgr2
GO Molecular Function	GO:0003993	acid phosphatase activity	267	0.0404961	1	0.493537	3.13968	1.27402	4	0.000606675	0.00190476	634	0.192017	1	0.985528	1.94526	1.54221	3	11	0.0010582	0.272727	region_1751,region_2063,region_811,region_812	Acpl2,C330005M16Rik,Minpp1
GO Molecular Function	GO:0015300	solute:solute antiporter activity	268	0.0406223	1	0.493227	1.66954	8.98451	15	0.00427834	0.00714286	357	0.111267	1	1	1.5657	5.74823	9	41	0.0031746	0.219512	region_1127,region_1128,region_1129,region_1130,region_1166,region_1167,region_117,region_1563,region_1630,region_1631,region_2061,region_50,region_681,region_682,region_867	Slc26a11,Slc26a7,Slc26a9,Slc47a1,Slc4a3,Slc4a4,Slc4a9,Slc8a1,Slc9a9
GO Molecular Function	GO:0016903	oxidoreductase activity, acting on the aldehyde or oxo group of donors	269	0.0409728	1	0.495633	1.70233	8.22402	14	0.0039162	0.00666667	102	0.00587459	1	0.187411	2.10737	6.16883	13	44	0.00458554	0.295455	region_1108,region_144,region_1766,region_1776,region_1805,region_2,region_20,region_2034,region_2054,region_2055,region_274,region_49,region_885,region_995	Aldh1a2,Aldh1a3,Aldh1l1,Aldh3a1,Aldh5a1,Aldh7a1,Aldh8a1,Aox3,Bckdhb,Far1,Gapdh,Htatip2,Ogdh
GO Molecular Function	GO:0005100	Rho GTPase activator activity	270	0.0412871	1	0.497586	1.78674	6.71614	12	0.00319816	0.00571429	136	0.0134482	1	0.321769	2.37754	3.36482	8	24	0.00282187	0.333333	region_1066,region_1067,region_1375,region_1376,region_1909,region_1998,region_246,region_29,region_30,region_386,region_959,region_960	Arhgap10,Arhgap15,Chn2,Dock2,Dock4,Prex2,Srgap1,Thy1
GO Molecular Function	GO:0008889	glycerophosphodiester phosphodiesterase activity	271	0.0413103	1	0.496028	3.1191	1.28242	4	0.000610677	0.00190476	147	0.0168522	1	0.373041	3.56631	1.12161	4	8	0.00141094	0.5	region_1449,region_1798,region_1814,region_1887	Enpp6,Gde1,Gdpd4,Gpcpd1
GO Molecular Function	GO:0016842	amidine-lyase activity	272	0.0414877	1	0.496328	3.96001	0.757573	3	0.000360749	0.00142857	243	0.0534443	1	0.715669	4.75509	0.420602	2	3	0.000705467	0.666667	region_1147,region_1148,region_514	Adsl,Pam
GO Molecular Function	GO:0001882	nucleoside binding	273	0.0422279	1	0.503332	2.66264	1.87783	5	0.000894206	0.00238095	233	0.0480381	1	0.670884	2.37754	2.10301	5	15	0.00176367	0.333333	region_1733,region_1752,region_1789,region_204,region_2095	Actn4,Cda,Pola1,Polr3b,Slc28a1
GO Molecular Function	GO:0005215	transporter activity	274	0.0424626	1	0.504282	1.11743	206.724	231	0.0984402	0.11	205	0.0327216	1	0.519395	1.13888	153.66	175	1096	0.0617284	0.159671	region_1018,region_102,region_1020,region_1024,region_1028,region_1038,region_1041,region_105,region_1050,region_1054,region_1055,region_1056,region_1057,region_106,region_1069,region_107,region_108,region_1088,region_109,region_1096,region_1097,region_110,region_111,region_1127,region_1128,region_1129,region_1130,region_1146,region_1150,region_1151,region_1152,region_1166,region_1167,region_117,…	1810063B05Rik,2010107G12Rik,Abca4,Abcb5,Abcc2,Abcc4,Abcg8,Accn1,Aldh1l1,Ank,Ano1,Ano4,Ano6,Ap3b1,Aqp11,Aqp3,Atp10a,Atp10d,Atp11b,Atp12a,Atp1b3,Atp5g3,Atp6v0c,Atp6v1g3,Atp6v1h,Atp8a1,Bcl2,Cacna1a,Cacna1b,Cacna1e,Cacna2d1,Cacna2d3,Cacng3,Cacng5,Cftr,Chrna7,Clca6,Clcn3,Clvs1,Cnga3,Cox10,Cox6a1,Cox8b,Doc2b,Folr4,Gabrb3,Gabrg3,Gc,Gja10,Glra1,Gltp,Gria1,Grik3,Grik4,Grin2a,Grin2b,Grin2c,Grin3a,Grm7,Hcn1…
GO Molecular Function	GO:0000340	RNA 7-methylguanosine cap binding	275	0.0430743	1	0.509686	6.119	0.326851	2	0.000155643	0.000952381	734	0.260751	1	1	3.56631	0.280402	1	2	0.000352734	0.5	region_510,region_511	Eif2c2
GO Molecular Function	GO:0033765	steroid dehydrogenase activity, acting on the CH-CH group of donors	276	0.0431656	1	0.508917	3.89647	0.769927	3	0.000366632	0.00142857	317	0.0970323	1	0.996035	3.56631	0.560803	2	4	0.000705467	0.5	region_321,region_944,region_945	Akr1d1,Srd5a1
GO Molecular Function	GO:0033872	[heparan sulfate]-glucosamine 3-sulfotransferase 3 activity	277	0.0440627	1	0.517617	3.86383	0.776432	3	0.00036973	0.00142857	385	0.140201	1	1	7.13263	0.140201	1	1	0.000352734	1	region_54,region_55,region_56	Hs3st3b1
GO Molecular Function	GO:0070492	oligosaccharide binding	278	0.0443992	1	0.519694	3.04534	1.31348	4	0.000625468	0.00190476	935	0.364405	1	1	2.37754	0.420602	1	3	0.000352734	0.333333	region_1985,region_1986,region_1987,region_1988	Ntm
GO Molecular Function	GO:0004602	glutathione peroxidase activity	279	0.044726	1	0.521643	3.0379	1.3167	4	0.000626998	0.00190476	370	0.12145	1	1	2.03789	1.96281	4	14	0.00141094	0.285714	region_1192,region_1261,region_202,region_40	Gpx4,Ltc4s,Mgst2,Mgst3
GO Molecular Function	GO:0042826	histone deacetylase binding	280	0.0449091	1	0.521908	1.49345	14.731	22	0.00701475	0.0104762	232	0.0463487	1	0.65008	1.67826	7.15024	12	51	0.0042328	0.235294	region_1330,region_1415,region_1416,region_170,region_171,region_172,region_1830,region_2090,region_218,region_369,region_414,region_52,region_53,region_642,region_723,region_724,region_76,region_77,region_78,region_79,region_80,region_81	1700071K01Rik,Bcor,D7Ertd443e,Hes1,Hif1a,Lpin1,Ncor1,Nr2c1,Pkn2,Prdm1,Sik1,Traf6
GO Molecular Function	GO:0005484	SNAP receptor activity	281	0.0452036	1	0.52346	2.61142	1.91466	5	0.000911745	0.00238095	698	0.238914	1	1	1.58503	2.52361	4	18	0.00141094	0.222222	region_132,region_1495,region_1656,region_837,region_838	Stx11,Stx16,Stx17,Vti1a
GO Molecular Function	GO:0047066	phospholipid-hydroperoxide glutathione peroxidase activity	282	0.0457414	1	0.52781	21.3584	0.0468201	1	2.22953e-05	0.00047619	385	0.140201	1	1	7.13263	0.140201	1	1	0.000352734	1	region_202	Gpx4
GO Molecular Function	GO:0001156	TFIIIC-class transcription factor binding	283	0.0457455	1	0.525993	5.91617	0.338057	2	0.000160979	0.000952381	734	0.260751	1	1	3.56631	0.280402	1	2	0.000352734	0.5	region_118,region_119	Rptor
GO Molecular Function	GO:0003796	lysozyme activity	284	0.0463162	1	0.530679	3.00266	1.33215	4	0.000634357	0.00190476	1086	0.419221	1	1	1.42653	1.40201	2	10	0.000705467	0.2	region_74,region_75,region_843,region_844	Lyzl1,Spaca3
GO Molecular Function	GO:0019205	nucleobase-containing compound kinase activity	285	0.0464732	1	0.53061	1.94323	4.63147	9	0.00220546	0.00428571	1350	0.607176	1	1	0.963869	5.18743	5	37	0.00176367	0.135135	region_1191,region_2000,region_373,region_374,region_375,region_376,region_377,region_466,region_901	Cmpk2,Dscaml1,Rnf165,Spef2,Uck2
GO Molecular Function	GO:0034458	3'-5' RNA helicase activity	286	0.046601	1	0.530209	20.955	0.0477213	1	2.27244e-05	0.00047619	385	0.140201	1	1	7.13263	0.140201	1	1	0.000352734	1	region_185	Supv3l1
GO Molecular Function	GO:0017016	Ras GTPase binding	287	0.0472692	1	0.535937	1.39444	21.514	30	0.0102448	0.0142857	297	0.079742	1	0.873672	1.39711	13.5995	19	97	0.00670194	0.195876	region_100,region_1142,region_1384,region_1399,region_1691,region_1732,region_1788,region_2031,region_2032,region_246,region_278,region_301,region_386,region_406,region_407,region_408,region_409,region_410,region_492,region_493,region_548,region_659,region_660,region_661,region_662,region_67,region_845,region_943,region_98,region_99	Anxa2,Daam1,Dgki,Dock4,Dock7,Exoc2,Fert2,Fmnl2,Iqgap1,Mlph,Nsf,Nup153,Rap1gap,Rapgef4,Rims2,Rock1,Rph3al,Srgap1,Vcl
GO Molecular Function	GO:0032143	single thymine insertion binding	288	0.0476267	1	0.538115	5.78365	0.345803	2	0.000164668	0.000952381	160	0.0196503	1	0.399638	7.13263	0.280402	2	2	0.000705467	1	region_691,region_692	Msh2,Msh6
GO Molecular Function	GO:0010314	phosphatidylinositol-5-phosphate binding	289	0.0481094	1	0.541689	3.72676	0.804989	3	0.000383328	0.00142857	1114	0.453529	1	1	1.78316	0.560803	1	4	0.000352734	0.25	region_1406,region_1407,region_1408	Sestd1
GO Molecular Function	GO:0030748	amine N-methyltransferase activity	290	0.048375	1	0.542801	20.168	0.0495836	1	2.36112e-05	0.00047619	385	0.140201	1	1	7.13263	0.140201	1	1	0.000352734	1	region_964	Inmt
GO Molecular Function	GO:0008271	secondary active sulfate transmembrane transporter activity	291	0.0484468	1	0.541739	2.95771	1.3524	4	0.000644	0.00190476	603	0.154978	1	0.836317	2.13979	1.40201	3	10	0.0010582	0.3	region_1166,region_1167,region_117,region_380	Slc26a11,Slc26a4,Slc26a9
GO Molecular Function	GO:0000982	RNA polymerase II core promoter proximal region sequence-specific DNA binding transcription factor activity	292	0.0485273	1	0.54078	1.40888	19.8739	28	0.00946378	0.0133333	92	0.00492262	1	0.174111	2.08035	6.72964	14	48	0.00493827	0.291667	region_107,region_108,region_109,region_110,region_1349,region_1494,region_1560,region_166,region_1680,region_1681,region_1682,region_1911,region_2060,region_275,region_276,region_285,region_286,region_373,region_374,region_375,region_376,region_377,region_378,region_443,region_723,region_724,region_896,region_897	Gata3,Hes1,Nfib,Nr2e1,Plscr1,Pou4f2,Rcor1,Rest,Sox11,Sox4,Sox9,Tcf4,Tcfap2a,Tcfap2c
GO Molecular Function	GO:0004033	aldo-keto reductase (NADP) activity	293	0.0486749	1	0.540573	2.95304	1.35454	4	0.000645017	0.00190476	290	0.0752377	1	0.844219	2.37754	1.68241	4	12	0.00141094	0.333333	region_1074,region_1742,region_49,region_939	Akr1b3,Aldh3a1,Dhrs3,Rdh10
GO Molecular Function	GO:0055131	C3HC4-type RING finger domain binding	294	0.0490059	1	0.542399	19.9018	0.0502468	1	2.39271e-05	0.00047619	385	0.140201	1	1	7.13263	0.140201	1	1	0.000352734	1	region_1733	Pink1
GO Molecular Function	GO:0043422	protein kinase B binding	295	0.049189	1	0.54258	3.69274	0.812404	3	0.000386859	0.00142857	644	0.200718	1	1	2.37754	0.841205	2	6	0.000705467	0.333333	region_1415,region_1416,region_21	Ccdc88a,Traf6
GO Molecular Function	GO:0001030	RNA polymerase III type 1 promoter DNA binding	296	0.0492771	1	0.541715	5.67366	0.352506	2	0.00016786	0.000952381	935	0.364405	1	1	2.37754	0.420602	1	3	0.000352734	0.333333	region_118,region_119	Rptor
GO Molecular Function	GO:0001031	RNA polymerase III type 2 promoter DNA binding	296	0.0492771	1	0.541715	5.67366	0.352506	2	0.00016786	0.000952381	935	0.364405	1	1	2.37754	0.420602	1	3	0.000352734	0.333333	region_118,region_119	Rptor
GO Molecular Function	GO:0001032	RNA polymerase III type 3 promoter DNA binding	296	0.0492771	1	0.541715	5.67366	0.352506	2	0.00016786	0.000952381	935	0.364405	1	1	2.37754	0.420602	1	3	0.000352734	0.333333	region_118,region_119	Rptor
GO Molecular Function	GO:0022892	substrate-specific transporter activity	299	0.0504847	1	0.549422	1.12194	177.372	199	0.0844628	0.0947619	122	0.0103783	1	0.276812	1.19546	124.638	149	889	0.0525573	0.167604	region_1018,region_102,region_1020,region_1028,region_1038,region_105,region_1050,region_1054,region_1055,region_1056,region_1057,region_106,region_107,region_108,region_1088,region_109,region_1096,region_1097,region_110,region_111,region_1127,region_1128,region_1129,region_1130,region_1166,region_1167,region_117,region_1174,region_1175,region_1183,region_1200,region_1225,region_1254,region_1256,…	1810063B05Rik,Abca4,Abcc4,Abcg8,Accn1,Aldh1l1,Ank,Ano1,Ano4,Ano6,Ap3b1,Aqp3,Atp10a,Atp10d,Atp11b,Atp12a,Atp1b3,Atp5g3,Atp6v0c,Atp6v1g3,Atp6v1h,Atp8a1,Cacna1a,Cacna1b,Cacna1e,Cacna2d1,Cacna2d3,Cacng3,Cacng5,Cftr,Chrna7,Clca6,Clcn3,Cnga3,Cox10,Cox6a1,Cox8b,Gabrb3,Gabrg3,Glra1,Gltp,Gria1,Grik3,Grik4,Grin2a,Grin2b,Grin2c,Grin3a,Grm7,Hcn1,Htr3a,Ipo11,Ipo5,Ipo8,Itpr1,Kcna5,Kcnb1,Kcnc2,Kcne1,Kcng4,Kcnh1…
GO Molecular Function	GO:0009055	electron carrier activity	300	0.0506322	1	0.54919	1.38511	21.6589	30	0.0103138	0.0142857	712	0.250679	1	1	1.14631	23.5537	27	168	0.00952381	0.160714	region_1108,region_1244,region_1303,region_1319,region_1483,region_1506,region_1508,region_1509,region_1669,region_2013,region_2014,region_219,region_252,region_433,region_437,region_617,region_618,region_636,region_648,region_664,region_677,region_817,region_819,region_825,region_947,region_948,region_952,region_953,region_954,region_987	4930528F23Rik,Aox3,Aox4,Cycs,Cyp19a1,Cyp1b1,Cyp26a1,Cyp26b1,Cyp2c44,Cyp2c70,Cyp2u1,Cyp39a1,Cyp46a1,Cyp51,Cyp7b1,Dpyd,Glrx5,Ndufa12,Nox3,Pdia4,Ptgis,Steap1,Steap2,Suox,Tbxas1,Txn1,Txndc2
GO Molecular Function	GO:0008198	ferrous iron binding	301	0.0509494	1	0.550795	2.12001	3.30188	7	0.00157232	0.00333333	154	0.0181449	1	0.383398	2.97193	1.68241	5	12	0.00176367	0.416667	region_1414,region_1931,region_2056,region_2057,region_2058,region_684,region_965	Alkbh3,Fto,Haao,Nt5e,Snca
GO Molecular Function	GO:0004969	histamine receptor activity	302	0.0515228	1	0.55515	2.89691	1.38078	4	0.000657514	0.00190476	317	0.0970323	1	0.996035	3.56631	0.560803	2	4	0.000705467	0.5	region_311,region_849,region_850,region_851	Hrh2,Hrh4
GO Molecular Function	GO:0008251	tRNA-specific adenosine deaminase activity	303	0.0516741	1	0.554942	18.8479	0.0530564	1	2.52649e-05	0.00047619	385	0.140201	1	1	7.13263	0.140201	1	1	0.000352734	1	region_1949	Adat1
GO Molecular Function	GO:0005136	interleukin-4 receptor binding	304	0.0522056	1	0.558806	18.6508	0.053617	1	2.55319e-05	0.00047619	385	0.140201	1	1	7.13263	0.140201	1	1	0.000352734	1	region_44	Il4
GO Molecular Function	GO:0004028	3-chloroallyl aldehyde dehydrogenase activity	305	0.0535329	1	0.571135	3.56521	0.841464	3	0.000400697	0.00142857	117	0.00985627	1	0.274122	5.34947	0.560803	3	4	0.0010582	0.75	region_1776,region_2034,region_49	Aldh1a2,Aldh1a3,Aldh3a1
GO Molecular Function	GO:0004731	purine-nucleoside phosphorylase activity	306	0.0535699	1	0.569662	18.1628	0.0550574	1	2.62178e-05	0.00047619	734	0.260751	1	1	3.56631	0.280402	1	2	0.000352734	0.5	region_566	Pnp2
GO Molecular Function	GO:0070403	NAD+ binding	307	0.0537479	1	0.569693	2.85564	1.40074	4	0.000667017	0.00190476	634	0.192017	1	0.985528	1.94526	1.54221	3	11	0.0010582	0.272727	region_1317,region_1318,region_1776,region_188	Aldh1a3,Hadh,Sirt1
GO Molecular Function	GO:0050656	3'-phosphoadenosine 5'-phosphosulfate binding	308	0.0548505	1	0.579491	5.33955	0.374564	2	0.000178364	0.000952381	160	0.0196503	1	0.399638	7.13263	0.280402	2	2	0.000705467	1	region_1822,region_1827	Chst15,Sult1a1
GO Molecular Function	GO:0000030	mannosyltransferase activity	309	0.055269	1	0.582024	3.518	0.852756	3	0.000406074	0.00142857	928	0.352872	1	1	1.42653	2.10301	3	15	0.0010582	0.2	region_1201,region_1484,region_1485	Adnp,Dpm1,Pigm
GO Molecular Function	GO:0034512	box C/D snoRNA binding	310	0.0553402	1	0.580894	17.5655	0.0569297	1	2.71094e-05	0.00047619	385	0.140201	1	1	7.13263	0.140201	1	1	0.000352734	1	region_827	Nolc1
GO Molecular Function	GO:0034513	box H/ACA snoRNA binding	310	0.0553402	1	0.580894	17.5655	0.0569297	1	2.71094e-05	0.00047619	385	0.140201	1	1	7.13263	0.140201	1	1	0.000352734	1	region_827	Nolc1
GO Molecular Function	GO:0015291	secondary active transmembrane transporter activity	312	0.0558504	1	0.582491	1.30034	32.2993	42	0.0153806	0.02	669	0.211985	1	1	1.16293	25.7969	30	184	0.010582	0.163044	region_1024,region_1041,region_1127,region_1128,region_1129,region_1130,region_1166,region_1167,region_117,region_1302,region_1446,region_1447,region_1448,region_1501,region_1530,region_1535,region_1563,region_1598,region_16,region_1630,region_1631,region_1744,region_1789,region_1854,region_1895,region_1912,region_194,region_195,region_196,region_2061,region_247,region_248,region_249,region_380,r…	Ank,Clcn3,Slc10a7,Slc15a3,Slc15a4,Slc15a5,Slc16a7,Slc16a9,Slc1a3,Slc1a4,Slc20a2,Slc23a2,Slc25a18,Slc26a11,Slc26a4,Slc26a7,Slc26a9,Slc28a1,Slc34a2,Slc35a3,Slc38a2,Slc45a1,Slc47a1,Slc4a3,Slc4a4,Slc4a9,Slc5a1,Slc8a1,Slc9a9,Slco4a1
GO Molecular Function	GO:0045296	cadherin binding	313	0.056377	1	0.586105	1.65664	7.8472	13	0.00373676	0.00619048	222	0.0402462	1	0.589916	2.25241	2.66382	6	19	0.0021164	0.31579	region_1654,region_1655,region_1666,region_1667,region_1956,region_1957,region_1958,region_2087,region_659,region_660,region_661,region_662,region_866	Cdh13,Ctnna1,Ctnnal1,Ctnnb1,Fert2,Tbc1d2
GO Molecular Function	GO:0033925	mannosyl-glycoprotein endo-beta-N-acetylglucosaminidase activity	314	0.0564845	1	0.585352	5.25105	0.380876	2	0.00018137	0.000952381	385	0.140201	1	1	7.13263	0.140201	1	1	0.000352734	1	region_115,region_116	Engase
GO Molecular Function	GO:0032841	calcitonin binding	315	0.0573018	1	0.591937	5.20821	0.384009	2	0.000182861	0.000952381	385	0.140201	1	1	7.13263	0.140201	1	1	0.000352734	1	region_909,region_910	Calcr
GO Molecular Function	GO:0001078	RNA polymerase II core promoter proximal region sequence-specific DNA binding transcription factor activity involved in negative regulation of transcription	316	0.0574609	1	0.591702	1.79403	5.57404	10	0.0026543	0.00476191	58	0.00109965	1	0.0616943	3.35653	2.38341	8	17	0.00282187	0.470588	region_1349,region_1494,region_1560,region_166,region_1911,region_285,region_286,region_443,region_723,region_724	Gata3,Hes1,Nr2e1,Pou4f2,Rcor1,Rest,Tcfap2a,Tcfap2c
GO Molecular Function	GO:0004518	nuclease activity	317	0.0574926	1	0.590161	1.4141	17.6791	25	0.00841864	0.0119048	1521	0.829296	1	1	0.833684	21.5909	18	154	0.00634921	0.116883	region_1415,region_1464,region_1465,region_148,region_1713,region_1786,region_280,region_368,region_39,region_475,region_476,region_510,region_511,region_566,region_567,region_595,region_596,region_597,region_708,region_709,region_710,region_711,region_847,region_928,region_929	Aen,Cnot6,Ddx1,Dis3,Drosha,Eif2c2,Enpp1,Enpp3,Ercc4,Parn,Rag1,Rbbp8,Rnase1,Rnase10,Rpp40,Snd1,Xrn2,Zc3h12a
GO Molecular Function	GO:0019903	protein phosphatase binding	318	0.0575369	1	0.588758	1.48063	13.5078	20	0.00643229	0.00952381	112	0.00867889	1	0.252153	1.91053	7.85124	15	56	0.005291	0.267857	region_1150,region_1151,region_1152,region_1177,region_1535,region_1659,region_1788,region_2016,region_2087,region_329,region_342,region_343,region_396,region_456,region_769,region_853,region_854,region_855,region_872,region_88	Akap1,Anapc4,Ap3b1,Bcl2,Cdh2,Ctnnb1,Ghr,Grin3a,Iqgap1,Pik3r1,Pstpip1,Sh3rf2,Smg7,Sod1,Strn3
GO Molecular Function	GO:0004402	histone acetyltransferase activity	319	0.0583124	1	0.594823	1.85704	4.84642	9	0.00230782	0.00428571	226	0.0404581	1	0.582524	1.88805	4.76683	9	34	0.0031746	0.264706	region_1070,region_1190,region_1397,region_1426,region_1482,region_1559,region_280,region_49,region_549	Cdyl,Clock,Elp4,Mettl8,Myst4,Ncoa2,Ncoa3,Tada1,Usp22
GO Molecular Function	GO:0015116	sulfate transmembrane transporter activity	320	0.0583596	1	0.593444	2.77641	1.44071	4	0.000686052	0.00190476	679	0.230944	1	1	1.78316	1.68241	3	12	0.0010582	0.25	region_1166,region_1167,region_117,region_380	Slc26a11,Slc26a4,Slc26a9
GO Molecular Function	GO:0032405	MutLalpha complex binding	321	0.0588853	1	0.596925	5.12774	0.390035	2	0.000185731	0.000952381	644	0.200718	1	1	2.37754	0.841205	2	6	0.000705467	0.333333	region_691,region_692	Msh2,Msh6
GO Molecular Function	GO:0022857	transmembrane transporter activity	322	0.0589835	1	0.596063	1.11658	176.432	197	0.0840151	0.0938095	114	0.00946558	1	0.270184	1.20111	121.554	146	867	0.0514991	0.168397	region_1018,region_102,region_1020,region_1024,region_1028,region_1038,region_1041,region_105,region_1054,region_1055,region_1056,region_1057,region_106,region_107,region_108,region_1088,region_109,region_1096,region_1097,region_110,region_111,region_1127,region_1128,region_1129,region_1130,region_1150,region_1151,region_1152,region_1166,region_1167,region_117,region_1174,region_1175,region_1183,…	1810063B05Rik,Abca4,Abcb5,Abcc2,Abcc4,Accn1,Ank,Ano1,Ano4,Ano6,Aqp3,Atp10a,Atp10d,Atp11b,Atp12a,Atp1b3,Atp5g3,Atp6v0c,Atp6v1g3,Atp6v1h,Atp8a1,Bcl2,Cacna1a,Cacna1b,Cacna1e,Cacna2d1,Cacna2d3,Cacng3,Cacng5,Cftr,Chrna7,Clca6,Clcn3,Cnga3,Cox10,Cox6a1,Cox8b,Folr4,Gabrb3,Gabrg3,Gc,Gja10,Glra1,Gria1,Grik3,Grik4,Grin2a,Grin2b,Grin2c,Grin3a,Grm7,Hcn1,Htr3a,Itpr1,Kcna5,Kcnb1,Kcnc2,Kcne1,Kcng4,Kcnh1,Kcnh8,Kc…
GO Molecular Function	GO:0001076	RNA polymerase II transcription factor binding transcription factor activity	323	0.0593014	1	0.59742	1.3715	21.1448	29	0.0100689	0.0138095	69	0.00185084	1	0.0872844	2.15325	7.43064	16	53	0.00564374	0.301887	region_134,region_1591,region_1592,region_1593,region_1683,region_1711,region_1712,region_1714,region_1926,region_1927,region_1982,region_2056,region_2091,region_275,region_276,region_285,region_286,region_373,region_374,region_375,region_376,region_377,region_378,region_500,region_501,region_803,region_86,region_896,region_897	Cited2,Med13,Med13l,Med14,Med30,Pou3f1,Psip1,Sall1,Smarca2,Sox11,Sox4,Tbx18,Tbx20,Tcf4,Tcfap2a,Thrap3
GO Molecular Function	GO:0004534	5'-3' exoribonuclease activity	324	0.0596166	1	0.598742	5.09166	0.392799	2	0.000187047	0.000952381	734	0.260751	1	1	3.56631	0.280402	1	2	0.000352734	0.5	region_1464,region_1465	Xrn2
GO Molecular Function	GO:0016651	oxidoreductase activity, acting on NADH or NADPH	325	0.0598043	1	0.59878	1.67972	7.14403	12	0.00340192	0.00571429	1372	0.647888	1	1	0.9246	7.57084	7	54	0.00246914	0.12963	region_1340,region_1341,region_219,region_356,region_357,region_358,region_359,region_515,region_617,region_618,region_664,region_68	Cryz,Cyb5r3,Ndufa12,Ndufs4,Nox3,Nxn,Txndc2
GO Molecular Function	GO:0004713	protein tyrosine kinase activity	326	0.0609228	1	0.608106	1.26454	38.7494	49	0.0184521	0.0233333	41	0.000195085	0.634808	0.0154831	1.80758	20.4693	37	146	0.0130511	0.253425	region_105,region_1131,region_1176,region_1184,region_1270,region_1403,region_1404,region_1405,region_1438,region_1443,region_1554,region_1557,region_1558,region_159,region_1615,region_1632,region_1637,region_1638,region_1668,region_1690,region_1726,region_1737,region_1777,region_1785,region_1861,region_1875,region_1876,region_1877,region_1878,region_1968,region_1969,region_1970,region_2066,regio…	Abl2,D8Ertd82e,Ddr1,Dyrk2,Eif2ak2,Epha2,Epha4,Epha7,Fert2,Fgfr1,Fgr,Frk,Hmcn1,Igf1r,Igsf10,Jak2,Kit,Lmtk2,Map2k6,Mertk,Nek10,Nrp1,Ntrk2,Ntrk3,Pdgfra,Ptk2,Ptk2b,Ptpn3,Ripk2,Ror2,Ryk,Sykb,Tec,Tek,Ttn,Twf1,Tyro3
GO Molecular Function	GO:0016705	oxidoreductase activity, acting on paired donors, with incorporation or reduction of molecular oxygen	327	0.0610588	1	0.6076	1.31463	28.1448	37	0.0134023	0.0176191	621	0.179471	1	0.940417	1.17688	28.0402	33	200	0.0116402	0.165	region_1026,region_1107,region_1147,region_1148,region_1214,region_1244,region_1319,region_1322,region_1373,region_1410,region_1414,region_147,region_1483,region_1506,region_1678,region_179,region_182,region_1900,region_1931,region_2013,region_2014,region_202,region_2098,region_398,region_399,region_437,region_440,region_441,region_648,region_677,region_817,region_819,region_825,region_826,region…	1110034B05Rik,Alkbh3,Cyp19a1,Cyp1b1,Cyp26a1,Cyp26b1,Cyp2c44,Cyp2c70,Cyp2u1,Cyp39a1,Cyp46a1,Cyp51,Cyp7b1,Degs1,Degs2,Egln3,Fto,Gpx4,Kdm5c,Leprel2,Moxd1,P4ha1,Pam,Pcbd1,Prdx6-rs1-ps,Ptgis,Ptgs1,Sc4mol,Scd2,Scd3,Tbxas1,Tet2,Tyrp1
GO Molecular Function	GO:0008392	arachidonic acid epoxygenase activity	328	0.0613735	1	0.60887	15.7886	0.0633367	1	3.01603e-05	0.00047619	385	0.140201	1	1	7.13263	0.140201	1	1	0.000352734	1	region_825	Cyp2c44
GO Molecular Function	GO:0032357	oxidized purine DNA binding	329	0.0617422	1	0.610666	4.99044	0.400766	2	0.000190841	0.000952381	243	0.0534443	1	0.715669	4.75509	0.420602	2	3	0.000705467	0.666667	region_691,region_692	Msh2,Msh6
GO Molecular Function	GO:0032142	single guanine insertion binding	329	0.0617422	1	0.610666	4.99044	0.400766	2	0.000190841	0.000952381	243	0.0534443	1	0.715669	4.75509	0.420602	2	3	0.000705467	0.666667	region_691,region_692	Msh2,Msh6
GO Molecular Function	GO:0005109	frizzled binding	331	0.0620138	1	0.609646	1.71423	6.41688	11	0.00305566	0.00523809	229	0.0416659	1	0.592057	2.08035	3.36482	7	24	0.00246914	0.291667	region_100,region_1855,region_2066,region_308,region_309,region_47,region_556,region_843,region_844,region_98,region_99	Bambi,Ror2,Ryk,Sfrp1,Wnt3,Wnt3a,Wnt5a
GO Molecular Function	GO:0015297	antiporter activity	332	0.0622698	1	0.61032	1.54312	10.3686	16	0.00493742	0.00761905	675	0.21834	1	1	1.32086	7.57084	10	54	0.00352734	0.185185	region_1127,region_1128,region_1129,region_1130,region_1166,region_1167,region_117,region_1563,region_1630,region_1631,region_1895,region_2061,region_50,region_681,region_682,region_867	Clcn3,Slc26a11,Slc26a7,Slc26a9,Slc47a1,Slc4a3,Slc4a4,Slc4a9,Slc8a1,Slc9a9
GO Molecular Function	GO:0005018	platelet-derived growth factor alpha-receptor activity	333	0.0628723	1	0.614374	4.93871	0.404964	2	0.00019284	0.000952381	385	0.140201	1	1	7.13263	0.140201	1	1	0.000352734	1	region_1557,region_1558	Pdgfra
GO Molecular Function	GO:0051183	vitamin transporter activity	334	0.0636571	1	0.62018	2.36265	2.11627	5	0.00100775	0.00238095	1077	0.393495	1	1	1.33737	2.24321	3	16	0.0010582	0.1875	region_1446,region_1447,region_1448,region_1563,region_1975	Folr4,Gc,Slc23a2
GO Molecular Function	GO:0032422	purine-rich negative regulatory element binding	335	0.064009	1	0.621747	4.88807	0.40916	2	0.000194838	0.000952381	935	0.364405	1	1	2.37754	0.420602	1	3	0.000352734	0.333333	region_215,region_216	Elk3
GO Molecular Function	GO:0005110	frizzled-2 binding	336	0.0643914	1	0.6236	2.35455	2.12355	5	0.00101121	0.00238095	280	0.0621625	1	0.722417	3.05684	0.981406	3	7	0.0010582	0.428571	region_100,region_47,region_556,region_98,region_99	Wnt3,Wnt3a,Wnt5a
GO Molecular Function	GO:0043539	protein serine/threonine kinase activator activity	337	0.0653922	1	0.631413	2.66926	1.49854	4	0.000713591	0.00190476	714	0.256141	1	1	2.03789	0.981406	2	7	0.000705467	0.285714	region_485,region_602,region_603,region_604	Spry2,Stk3
GO Molecular Function	GO:0015171	amino acid transmembrane transporter activity	338	0.0666575	1	0.641726	1.48655	12.1086	18	0.00576601	0.00857143	191	0.0253753	1	0.43231	1.69825	8.83265	15	63	0.005291	0.238095	region_1254,region_1260,region_1501,region_1598,region_16,region_1618,region_1756,region_178,region_1904,region_1962,region_464,region_529,region_568,region_780,region_781,region_916,region_917,region_918	Nat3,Serinc1,Slc15a4,Slc1a3,Slc1a4,Slc25a13,Slc38a2,Slc3a2,Slc7a1,Slc7a11,Slc7a14,Slc7a5,Slc7a7,Slc7a9,Slco4a1
GO Molecular Function	GO:0032138	single base insertion or deletion binding	339	0.0668871	1	0.642037	4.76562	0.419672	2	0.000199844	0.000952381	317	0.0970323	1	0.996035	3.56631	0.560803	2	4	0.000705467	0.5	region_691,region_692	Msh2,Msh6
GO Molecular Function	GO:0052743	inositol tetrakisphosphate phosphatase activity	340	0.0675858	1	0.646836	3.23111	0.928472	3	0.00044213	0.00142857	317	0.0970323	1	0.996035	3.56631	0.560803	2	4	0.000705467	0.5	region_811,region_812,region_813	Minpp1,Pten
GO Molecular Function	GO:0015103	inorganic anion transmembrane transporter activity	341	0.0676641	1	0.645686	1.7384	5.7524	10	0.00273924	0.00476191	312	0.0937905	1	0.978187	1.67826	4.76683	8	34	0.00282187	0.235294	region_1166,region_1167,region_117,region_1535,region_1630,region_1631,region_1769,region_1854,region_380,region_478	Ank,Oca2,Slc20a2,Slc26a11,Slc26a4,Slc26a7,Slc26a9,Slc34a2
GO Molecular Function	GO:0004030	aldehyde dehydrogenase [NAD(P)+] activity	342	0.067912	1	0.646157	4.7239	0.423379	2	0.000201609	0.000952381	644	0.200718	1	1	2.37754	0.841205	2	6	0.000705467	0.333333	region_1776,region_49	Aldh1a3,Aldh3a1
GO Molecular Function	GO:0005021	vascular endothelial growth factor-activated receptor activity	343	0.0679531	1	0.644663	1.97951	3.53623	7	0.00168392	0.00333333	147	0.0168522	1	0.373041	3.56631	1.12161	4	8	0.00141094	0.5	region_1176,region_1270,region_1557,region_1558,region_1968,region_1969,region_1970	Hmcn1,Igsf10,Nrp1,Pdgfra
GO Molecular Function	GO:0042800	histone methyltransferase activity (H3-K4 specific)	344	0.0680015	1	0.643247	2.63304	1.51916	4	0.000723409	0.00190476	603	0.154978	1	0.836317	2.13979	1.40201	3	10	0.0010582	0.3	region_1520,region_1521,region_1594,region_632	Mll5,Prdm9,Setd1b
GO Molecular Function	GO:0032135	DNA insertion or deletion binding	345	0.0682673	1	0.643889	4.70966	0.424659	2	0.000202219	0.000952381	567	0.147006	1	0.843662	2.85305	0.701004	2	5	0.000705467	0.4	region_691,region_692	Msh2,Msh6
GO Molecular Function	GO:0042731	PH domain binding	346	0.0687809	1	0.646858	3.20697	0.935463	3	0.000445458	0.00142857	160	0.0196503	1	0.399638	7.13263	0.280402	2	2	0.000705467	1	region_152,region_153,region_1837	Epb4.1l2,Inpp5a
GO Molecular Function	GO:0016810	hydrolase activity, acting on carbon-nitrogen (but not peptide) bonds	347	0.0690437	1	0.647459	1.38508	18.0495	25	0.008595	0.0119048	231	0.0432898	1	0.609805	1.46848	14.3005	21	102	0.00740741	0.205882	region_1121,region_145,region_149,region_150,region_151,region_1531,region_160,region_161,region_1686,region_1703,region_1733,region_1736,region_1803,region_188,region_1883,region_1888,region_1926,region_1927,region_1949,region_1959,region_384,region_425,region_494,region_794,region_875	Acer2,Adad2,Adat1,Ampd3,Arg1,Arhgef10l,Asah1,Atic,Cda,Crmp1,Dctd,Dpys,Dpysl3,Faah,Galc,Gda,Hdac2,Hdac9,Sall1,Sirt1,Vnn3
GO Molecular Function	GO:0020037	heme binding	348	0.0692565	1	0.647589	1.39498	17.2045	24	0.00819262	0.0114286	1473	0.753714	1	1	0.886041	22.5723	20	161	0.00705467	0.124224	region_1244,region_1319,region_1373,region_1483,region_1506,region_1856,region_1857,region_1942,region_1943,region_2013,region_2014,region_252,region_437,region_513,region_648,region_677,region_807,region_817,region_819,region_825,region_947,region_948,region_954,region_987	Cyb5b,Cycs,Cyp19a1,Cyp1b1,Cyp26a1,Cyp26b1,Cyp2c44,Cyp2c70,Cyp2u1,Cyp39a1,Cyp46a1,Cyp51,Cyp7b1,Ido2,Jak2,Mb,Ptgis,Ptgs1,Suox,Tbxas1
GO Molecular Function	GO:0031267	small GTPase binding	349	0.0692745	1	0.6459	1.34191	22.3562	30	0.0106458	0.0142857	378	0.134676	1	1	1.30308	14.5809	19	104	0.00670194	0.182692	region_100,region_1142,region_1384,region_1399,region_1691,region_1732,region_1788,region_2031,region_2032,region_246,region_278,region_301,region_386,region_406,region_407,region_408,region_409,region_410,region_492,region_493,region_548,region_659,region_660,region_661,region_662,region_67,region_845,region_943,region_98,region_99	Anxa2,Daam1,Dgki,Dock4,Dock7,Exoc2,Fert2,Fmnl2,Iqgap1,Mlph,Nsf,Nup153,Rap1gap,Rapgef4,Rims2,Rock1,Rph3al,Srgap1,Vcl
GO Molecular Function	GO:0001077	RNA polymerase II core promoter proximal region sequence-specific DNA binding transcription factor activity involved in positive regulation of transcription	350	0.0711942	1	0.661902	1.39044	17.2607	24	0.0082194	0.0114286	110	0.00830954	1	0.245811	2.17941	5.04723	11	36	0.00388007	0.305556	region_107,region_108,region_109,region_110,region_1349,region_1494,region_166,region_1680,region_1681,region_1682,region_1911,region_2060,region_275,region_276,region_285,region_286,region_373,region_374,region_375,region_376,region_377,region_378,region_896,region_897	Gata3,Nfib,Nr2e1,Plscr1,Pou4f2,Sox11,Sox4,Sox9,Tcf4,Tcfap2a,Tcfap2c
GO Molecular Function	GO:0016813	hydrolase activity, acting on carbon-nitrogen (but not peptide) bonds, in linear amidines	351	0.0719386	1	0.666918	3.14574	0.953672	3	0.00045413	0.00142857	1506	0.810253	1	1	0.648421	1.54221	1	11	0.000352734	0.0909091	region_149,region_150,region_151	Arg1
GO Molecular Function	GO:0003924	GTPase activity	352	0.0721177	1	0.666678	1.31658	25.0648	33	0.0119356	0.0157143	1216	0.517106	1	1	1.00743	24.8155	25	177	0.00881834	0.141243	region_1026,region_1154,region_1272,region_1496,region_1711,region_1712,region_1806,region_1807,region_1938,region_2025,region_2051,region_2064,region_2065,region_241,region_252,region_265,region_306,region_385,region_403,region_444,region_445,region_50,region_609,region_610,region_611,region_677,region_707,region_723,region_724,region_792,region_793,region_862,region_992	Arl4a,Atl1,Atl2,Diras2,Eef1a1,Gm266,Gna14,Gnao1,Gnas,Gnb3,Gspt1,Mras,Opa1,Rab11a,Rab5b,Rab7,Rala,Ralb,Rap1b,Rap2a,Rap2b,Rit2,Rnf112,Rragc,Rras2
GO Molecular Function	GO:0010857	calcium-dependent protein kinase activity	353	0.072357	1	0.666997	4.55327	0.439245	2	0.000209164	0.000952381	160	0.0196503	1	0.399638	7.13263	0.280402	2	2	0.000705467	1	region_102,region_1733	Pink1,Prkca
GO Molecular Function	GO:0005262	calcium channel activity	354	0.0731493	1	0.672395	1.34934	20.7508	28	0.00988135	0.0133333	126	0.0116166	1	0.300003	1.71544	11.0759	19	79	0.00670194	0.240506	region_1018,region_102,region_1020,region_1038,region_1183,region_1267,region_1361,region_1514,region_1560,region_1588,region_1659,region_1686,region_1687,region_1819,region_1918,region_1975,region_257,region_258,region_259,region_314,region_315,region_557,region_701,region_702,region_703,region_704,region_705,region_706	Cacna1a,Cacna1b,Cacna1e,Cacna2d1,Cacna2d3,Cacng3,Cacng5,Grin2a,Grin2b,Grin3a,Grm7,Itpr1,Panx1,Rest,Ryr2,Slc24a2,Trpc4,Trpc7,Trpv4
GO Molecular Function	GO:0032393	MHC class I receptor activity	355	0.0732084	1	0.671043	13.1535	0.0760252	1	3.62025e-05	0.00047619	385	0.140201	1	1	7.13263	0.140201	1	1	0.000352734	1	region_1292	Cd160
GO Molecular Function	GO:0070851	growth factor receptor binding	356	0.0737669	1	0.674262	1.3651	19.0462	26	0.00906963	0.0123809	207	0.0333161	1	0.523723	1.5657	11.4965	18	82	0.00634921	0.219512	region_1029,region_1230,region_1276,region_1277,region_1301,region_1557,region_1558,region_1619,region_1845,region_2019,region_2060,region_26,region_44,region_497,region_571,region_572,region_573,region_574,region_649,region_659,region_660,region_661,region_662,region_787,region_807,region_869	Angpt1,Cntf,Fert2,Fgf1,Fgf15,Fgf18,Fgf23,Fgf9,Il12a,Il4,Il7,Jak2,Kl,Nptn,Pdgfra,Plscr1,Vav3,Vegfa
GO Molecular Function	GO:0004992	platelet activating factor receptor activity	357	0.0750969	1	0.684497	12.8099	0.0780649	1	3.71738e-05	0.00047619	385	0.140201	1	1	7.13263	0.140201	1	1	0.000352734	1	region_1725	Ptafr
GO Molecular Function	GO:0015183	L-aspartate transmembrane transporter activity	358	0.0751697	1	0.683247	3.08663	0.971935	3	0.000462826	0.00142857	1114	0.453529	1	1	1.78316	0.560803	1	4	0.000352734	0.25	region_916,region_917,region_918	Slc25a13
GO Molecular Function	GO:0008378	galactosyltransferase activity	359	0.0751736	1	0.681379	1.61384	7.43566	12	0.00354079	0.00571429	632	0.190794	1	0.982349	1.46848	4.76683	7	34	0.00246914	0.205882	region_1134,region_1135,region_1391,region_1574,region_1648,region_17,region_515,region_516,region_919,region_920,region_921,region_922	A4galt,B3galt1,B3gnt2,B3gnt7,B4galt1,C1galt1,Wdfy3
GO Molecular Function	GO:0003979	UDP-glucose 6-dehydrogenase activity	360	0.0753201	1	0.68081	12.7704	0.0783062	1	3.72887e-05	0.00047619	385	0.140201	1	1	7.13263	0.140201	1	1	0.000352734	1	region_1548	Ugdh
GO Molecular Function	GO:0008265	Mo-molybdopterin cofactor sulfurase activity	361	0.0754893	1	0.68045	12.7406	0.0784892	1	3.73758e-05	0.00047619	385	0.140201	1	1	7.13263	0.140201	1	1	0.000352734	1	region_858	Mocos
GO Molecular Function	GO:0004777	succinate-semialdehyde dehydrogenase activity	362	0.0761751	1	0.684734	12.6213	0.0792312	1	3.77292e-05	0.00047619	385	0.140201	1	1	7.13263	0.140201	1	1	0.000352734	1	region_274	Aldh5a1
GO Molecular Function	GO:0005017	platelet-derived growth factor-activated receptor activity	363	0.0767334	1	0.687853	4.39989	0.454557	2	0.000216456	0.000952381	734	0.260751	1	1	3.56631	0.280402	1	2	0.000352734	0.5	region_1557,region_1558	Pdgfra
GO Molecular Function	GO:0030275	LRR domain binding	364	0.076937	1	0.687783	2.04742	2.93052	6	0.00139549	0.00285714	1181	0.469711	1	1	1.29684	1.54221	2	11	0.000705467	0.181818	region_232,region_762,region_763,region_764,region_765,region_766	Pawr,Robo1
GO Molecular Function	GO:0070412	R-SMAD binding	365	0.0780041	1	0.695412	1.82012	4.39532	8	0.00209301	0.00380952	152	0.0171817	1	0.367823	2.67474	2.24321	6	16	0.0021164	0.375	region_1425,region_1426,region_2024,region_2087,region_413,region_898,region_899,region_900	Ctnnb1,Pax6,Ppm1a,Smad2,Smad3,Smad6
GO Molecular Function	GO:0005506	iron ion binding	366	0.07876	1	0.700232	1.25175	35.9497	45	0.0171189	0.0214286	925	0.34968	1	1	1.06989	36.4522	39	260	0.0137566	0.15	region_1026,region_1107,region_1108,region_1244,region_1319,region_1373,region_1414,region_1483,region_1506,region_1508,region_1509,region_179,region_1856,region_1857,region_1900,region_1931,region_1942,region_1943,region_2013,region_2014,region_2056,region_2057,region_2058,region_252,region_398,region_399,region_437,region_513,region_617,region_618,region_648,region_677,region_684,region_729,reg…	1110034B05Rik,Alkbh3,Aox3,Aox4,Cyb5b,Cycs,Cyp19a1,Cyp1b1,Cyp26a1,Cyp26b1,Cyp2c44,Cyp2c70,Cyp2u1,Cyp39a1,Cyp46a1,Cyp51,Cyp7b1,Egln3,Fto,Haao,Ido2,Jak2,Leprel2,Mb,Mfi2,Nfu1,Nox3,Nt5e,P4ha1,Ptgis,Ptgs1,Sc4mol,Scd2,Scd3,Snca,Steap1,Steap2,Suox,Tbxas1
GO Molecular Function	GO:0022891	substrate-specific transmembrane transporter activity	367	0.0790749	1	0.701116	1.10968	164.011	182	0.0781007	0.0866667	103	0.0065326	1	0.206379	1.22535	109.357	134	780	0.0472663	0.171795	region_1018,region_102,region_1020,region_1028,region_1038,region_105,region_1054,region_1055,region_1056,region_1057,region_106,region_107,region_108,region_1088,region_109,region_1096,region_1097,region_110,region_111,region_1127,region_1128,region_1129,region_1130,region_1166,region_1167,region_117,region_1174,region_1175,region_1183,region_1200,region_1225,region_1254,region_1256,region_1260,…	1810063B05Rik,Abcc4,Accn1,Ank,Ano1,Ano4,Ano6,Aqp3,Atp10a,Atp10d,Atp11b,Atp12a,Atp1b3,Atp5g3,Atp6v0c,Atp6v1g3,Atp6v1h,Atp8a1,Cacna1a,Cacna1b,Cacna1e,Cacna2d1,Cacna2d3,Cacng3,Cacng5,Cftr,Chrna7,Clca6,Clcn3,Cnga3,Cox10,Cox6a1,Cox8b,Gabrb3,Gabrg3,Glra1,Gria1,Grik3,Grik4,Grin2a,Grin2b,Grin2c,Grin3a,Grm7,Hcn1,Htr3a,Itpr1,Kcna5,Kcnb1,Kcnc2,Kcne1,Kcng4,Kcnh1,Kcnh8,Kcnj1,Kcnj16,Kcnj2,Kcnj5,Kcnj9,Kcnk12,Kc…
GO Molecular Function	GO:0008035	high-density lipoprotein particle binding	368	0.0791142	1	0.699559	3.01883	0.993763	3	0.000473221	0.00142857	1309	0.596048	1	1	1.18877	0.841205	1	6	0.000352734	0.166667	region_912,region_913,region_914	Pon1
GO Molecular Function	GO:0017137	Rab GTPase binding	369	0.0793289	1	0.699556	1.56489	8.30731	13	0.00395586	0.00619048	1112	0.445511	1	1	1.1262	5.32763	6	38	0.0021164	0.157895	region_100,region_1142,region_2031,region_2032,region_492,region_493,region_659,region_660,region_661,region_662,region_67,region_98,region_99	Anxa2,Fert2,Mlph,Nsf,Rims2,Rph3al
GO Molecular Function	GO:0008294	calcium- and calmodulin-responsive adenylate cyclase activity	370	0.0795957	1	0.700012	2.49036	1.60619	4	0.000764854	0.00190476	117	0.00985627	1	0.274122	5.34947	0.560803	3	4	0.0010582	0.75	region_3,region_363,region_734,region_735	Adcy1,Adcy3,Adcy5
GO Molecular Function	GO:0097100	supercoiled DNA binding	371	0.0801626	1	0.703098	11.9679	0.0835567	1	3.97889e-05	0.00047619	385	0.140201	1	1	7.13263	0.140201	1	1	0.000352734	1	region_1683	Psip1
GO Molecular Function	GO:0005452	inorganic anion exchanger activity	372	0.0805397	1	0.704506	2.02187	2.96755	6	0.00141312	0.00285714	679	0.230944	1	1	1.78316	1.68241	3	12	0.0010582	0.25	region_1127,region_1128,region_1129,region_1130,region_1563,region_867	Slc4a3,Slc4a4,Slc4a9
GO Molecular Function	GO:0000980	RNA polymerase II distal enhancer sequence-specific DNA binding	373	0.0809661	1	0.706337	2.19597	2.2769	5	0.00108424	0.00238095	147	0.0168522	1	0.373041	3.56631	1.12161	4	8	0.00141094	0.5	region_1494,region_1995,region_285,region_286,region_423	Esrrb,Fli1,Tcfap2a,Tcfap2c
GO Molecular Function	GO:0015095	magnesium ion transmembrane transporter activity	374	0.0809669	1	0.704456	4.26342	0.469107	2	0.000223384	0.000952381	1114	0.453529	1	1	1.78316	0.560803	1	4	0.000352734	0.25	region_233,region_234	Zdhhc17
GO Molecular Function	GO:0004527	exonuclease activity	375	0.0810054	1	0.70291	1.67744	5.96147	10	0.00283879	0.00476191	1102	0.425139	1	1	1.11884	7.15024	8	51	0.00282187	0.156863	region_1464,region_1465,region_148,region_1786,region_368,region_39,region_595,region_596,region_597,region_711	Aen,Cnot6,Ddx1,Dis3,Enpp1,Enpp3,Parn,Xrn2
GO Molecular Function	GO:0005342	organic acid transmembrane transporter activity	376	0.0823709	1	0.712859	1.35672	18.4269	25	0.00877469	0.0119048	192	0.0255645	1	0.433265	1.56761	12.7583	20	91	0.00705467	0.21978	region_1254,region_1260,region_1501,region_1598,region_16,region_1618,region_1756,region_1769,region_178,region_1904,region_1912,region_1962,region_2066,region_247,region_248,region_249,region_464,region_529,region_568,region_777,region_780,region_781,region_916,region_917,region_918	Nat3,Oca2,Serinc1,Slc10a7,Slc15a4,Slc16a7,Slc1a3,Slc1a4,Slc22a12,Slc25a13,Slc38a2,Slc3a2,Slc7a1,Slc7a11,Slc7a14,Slc7a5,Slc7a7,Slc7a9,Slco2a1,Slco4a1
GO Molecular Function	GO:0050321	tau-protein kinase activity	377	0.0826076	1	0.713011	2.96238	1.0127	3	0.000482237	0.00142857	1086	0.419221	1	1	1.42653	1.40201	2	10	0.000705467	0.2	region_1216,region_1217,region_779	Mark1,Mark2
GO Molecular Function	GO:0032137	guanine/thymine mispair binding	378	0.082724	1	0.712127	4.20987	0.475075	2	0.000226226	0.000952381	243	0.0534443	1	0.715669	4.75509	0.420602	2	3	0.000705467	0.666667	region_691,region_692	Msh2,Msh6
GO Molecular Function	GO:0005143	interleukin-12 receptor binding	379	0.0827268	1	0.710272	2.96051	1.01334	3	0.000482542	0.00142857	243	0.0534443	1	0.715669	4.75509	0.420602	2	3	0.000705467	0.666667	region_1276,region_1277,region_807	Il12a,Jak2
GO Molecular Function	GO:0008762	UDP-N-acetylmuramate dehydrogenase activity	380	0.0830207	1	0.710919	2.95591	1.01492	3	0.000483293	0.00142857	603	0.154978	1	0.836317	2.13979	1.40201	3	10	0.0010582	0.3	region_1108,region_1947,region_1948	Aox3,Aox4,Ldhd
GO Molecular Function	GO:0003714	transcription corepressor activity	381	0.0833046	1	0.711478	1.2641	31.6431	40	0.0150682	0.0190476	87	0.0042411	1	0.158627	1.71457	14.5809	25	104	0.00881834	0.240385	region_1012,region_1013,region_1014,region_1015,region_1016,region_1020,region_1039,region_1223,region_1245,region_1246,region_1247,region_13,region_134,region_160,region_161,region_1676,region_1677,region_1743,region_1828,region_188,region_2056,region_2090,region_2094,region_215,region_216,region_285,region_286,region_312,region_384,region_513,region_52,region_53,region_778,region_788,region_789…	Atf7ip,Bcor,C1d,Cited2,Ctbp2,Elk3,Hdac2,Hdac9,Jazf1,Lmcd1,Ncor1,Nsd1,Pex14,Prox1,Rbfox2,Rcor2,Rybp,Sirt1,Tbl1x,Tbl1xr1,Tbx18,Tcf4,Tcfap2a,Tle1,Tle4
GO Molecular Function	GO:0070411	I-SMAD binding	382	0.0834148	1	0.710555	1.88165	3.72015	7	0.0017715	0.00333333	266	0.0562068	1	0.687582	2.59368	1.54221	4	11	0.00141094	0.363636	region_103,region_104,region_2024,region_2087,region_898,region_899,region_900	Axin2,Ctnnb1,Smad2,Smad6
GO Molecular Function	GO:0004920	interleukin-10 receptor activity	383	0.0836525	1	0.710719	11.4472	0.0873578	1	4.1599e-05	0.00047619	385	0.140201	1	1	7.13263	0.140201	1	1	0.000352734	1	region_771	Il10rb
GO Molecular Function	GO:0030276	clathrin binding	384	0.0842487	1	0.71392	2.16902	2.30518	5	0.00109771	0.00238095	301	0.0893486	1	0.965915	2.67474	1.12161	3	8	0.0010582	0.375	region_1728,region_1793,region_487,region_488,region_489	Ldlrap1,Ncald,Picalm
GO Molecular Function	GO:0015194	L-serine transmembrane transporter activity	385	0.0847298	1	0.716132	4.15076	0.481839	2	0.000229447	0.000952381	243	0.0534443	1	0.715669	4.75509	0.420602	2	3	0.000705467	0.666667	region_16,region_178	Serinc1,Slc1a4
GO Molecular Function	GO:0017064	fatty acid amide hydrolase activity	386	0.0847936	1	0.714814	11.2862	0.0886037	1	4.21923e-05	0.00047619	385	0.140201	1	1	7.13263	0.140201	1	1	0.000352734	1	region_1703	Faah
GO Molecular Function	GO:0004791	thioredoxin-disulfide reductase activity	387	0.0849177	1	0.71401	4.14533	0.482471	2	0.000229748	0.000952381	567	0.147006	1	0.843662	2.85305	0.701004	2	5	0.000705467	0.4	region_664,region_68	Nxn,Txndc2
GO Molecular Function	GO:0016840	carbon-nitrogen lyase activity	388	0.0862829	1	0.72362	2.90627	1.03225	3	0.000491548	0.00142857	1056	0.366373	1	1	1.58503	1.26181	2	9	0.000705467	0.222222	region_1147,region_1148,region_514	Adsl,Pam
GO Molecular Function	GO:0050699	WW domain binding	389	0.0863677	1	0.722469	2.41824	1.6541	4	0.000787664	0.00190476	1105	0.433414	1	1	1.2587	2.38341	3	17	0.0010582	0.176471	region_1212,region_1213,region_601,region_868	Enah,Ndfip1,Ndfip2
GO Molecular Function	GO:0034602	oxoglutarate dehydrogenase (NAD+) activity	390	0.0865475	1	0.722117	11.0471	0.0905219	1	4.31057e-05	0.00047619	385	0.140201	1	1	7.13263	0.140201	1	1	0.000352734	1	region_2	Ogdh
GO Molecular Function	GO:0033781	cholesterol 24-hydroxylase activity	391	0.0867417	1	0.721886	11.0212	0.0907345	1	4.32069e-05	0.00047619	385	0.140201	1	1	7.13263	0.140201	1	1	0.000352734	1	region_437	Cyp46a1
GO Molecular Function	GO:0047395	glycerophosphoinositol glycerophosphodiesterase activity	392	0.0881618	1	0.731833	10.8353	0.0922907	1	4.3948e-05	0.00047619	385	0.140201	1	1	7.13263	0.140201	1	1	0.000352734	1	region_1814	Gde1
GO Molecular Function	GO:0004176	ATP-dependent peptidase activity	393	0.0883333	1	0.731391	2.39859	1.66765	4	0.000794119	0.00190476	714	0.256141	1	1	2.03789	0.981406	2	7	0.000705467	0.285714	region_1877,region_1878,region_1879,region_1921	Lonp2,Lonrf1
GO Molecular Function	GO:0004464	leukotriene-C4 synthase activity	394	0.0886993	1	0.732557	4.03971	0.495085	2	0.000235755	0.000952381	160	0.0196503	1	0.399638	7.13263	0.280402	2	2	0.000705467	1	region_1261,region_40	Ltc4s,Mgst2
GO Molecular Function	GO:0008120	ceramide glucosyltransferase activity	395	0.0890492	1	0.733585	2.86606	1.04673	3	0.000498444	0.00142857	734	0.260751	1	1	3.56631	0.280402	1	2	0.000352734	0.5	region_1671,region_1672,region_1673	Ugcg
GO Molecular Function	GO:0016496	substance P receptor activity	396	0.0902022	1	0.741207	3.99957	0.500054	2	0.000238121	0.000952381	385	0.140201	1	1	7.13263	0.140201	1	1	0.000352734	1	region_985,region_986	Tacr1
GO Molecular Function	GO:0004475	mannose-1-phosphate guanylyltransferase activity	397	0.0907127	1	0.743525	10.5161	0.0950921	1	4.52819e-05	0.00047619	734	0.260751	1	1	3.56631	0.280402	1	2	0.000352734	0.5	region_2069	Gmppb
GO Molecular Function	GO:0016309	1-phosphatidylinositol-5-phosphate 4-kinase activity	398	0.0917931	1	0.75049	3.95815	0.505286	2	0.000240612	0.000952381	243	0.0534443	1	0.715669	4.75509	0.420602	2	3	0.000705467	0.666667	region_1355,region_251	Pip4k2a,Pip4k2c
GO Molecular Function	GO:0017159	pantetheine hydrolase activity	399	0.09188	1	0.749317	10.376	0.0963766	1	4.58936e-05	0.00047619	734	0.260751	1	1	3.56631	0.280402	1	2	0.000352734	0.5	region_145	Vnn3
GO Molecular Function	GO:0004601	peroxidase activity	400	0.0924301	1	0.751919	1.83325	3.81835	7	0.00181826	0.00333333	923	0.3396	1	1	1.2587	4.76683	6	34	0.0021164	0.176471	region_1192,region_123,region_124,region_1261,region_1373,region_202,region_40	Gpx4,Iyd,Ltc4s,Mgst2,Mgst3,Ptgs1
GO Molecular Function	GO:0008238	exopeptidase activity	401	0.0925377	1	0.750917	1.37813	15.238	21	0.00725621	0.01	600	0.15326	1	0.831181	1.31175	12.1975	16	87	0.00564374	0.183908	region_1066,region_1314,region_1496,region_1550,region_1553,region_1634,region_171,region_172,region_173,region_1755,region_1787,region_1897,region_1898,region_1899,region_216,region_316,region_319,region_633,region_634,region_834,region_89	Agtpbp1,Anpep,Corin,Cpa6,Cpe,Ctsl,Enpep,Ggh,Lnpep,Lta4h,Npepl1,Pepd,Prep,Scpep1,Uchl1,Xpnpep1
GO Molecular Function	GO:0070363	mitochondrial light strand promoter sense binding	402	0.0935244	1	0.757036	10.1845	0.0981889	1	4.67566e-05	0.00047619	385	0.140201	1	1	7.13263	0.140201	1	1	0.000352734	1	region_199	Tfam
GO Molecular Function	GO:0046961	proton-transporting ATPase activity, rotational mechanism	403	0.093591	1	0.755695	2.34851	1.70321	4	0.000811051	0.00190476	1569	0.896346	1	1	0.475509	2.10301	1	15	0.000352734	0.0666667	region_1054,region_1055,region_1056,region_1057	Atp6v1h
GO Molecular Function	GO:0016208	AMP binding	404	0.0938657	1	0.756037	1.58535	6.93854	11	0.00330407	0.00523809	672	0.213167	1	1	1.47572	4.06582	6	29	0.0021164	0.206897	region_1399,region_1401,region_149,region_150,region_151,region_152,region_2070,region_2071,region_318,region_360,region_361	Akap7,Fbp1,Hcn1,Pde11a,Prkar2a,Rapgef4
GO Molecular Function	GO:0005034	osmosensor activity	405	0.0943105	1	0.757744	10.0953	0.0990565	1	4.71697e-05	0.00047619	385	0.140201	1	1	7.13263	0.140201	1	1	0.000352734	1	region_1588	Trpv4
GO Molecular Function	GO:0047173	phosphatidylcholine-retinol O-acyltransferase activity	406	0.0948508	1	0.760208	10.0348	0.0996532	1	4.74539e-05	0.00047619	385	0.140201	1	1	7.13263	0.140201	1	1	0.000352734	1	region_1281	Lrat
GO Molecular Function	GO:0008017	microtubule binding	407	0.0951569	1	0.760788	1.39831	13.5879	19	0.00647042	0.00904762	314	0.0960262	1	0.995125	1.42653	10.5151	15	75	0.005291	0.2	region_1052,region_1085,region_1086,region_1142,region_1153,region_1441,region_1442,region_1588,region_1753,region_1801,region_2043,region_21,region_266,region_340,region_446,region_88,region_916,region_917,region_918	Akap1,Bcl2l11,Ccdc88a,Clasp1,Clip3,Dst,Dync1i1,Kif26a,Mlph,Mtap1b,Myo5a,Rp1,Stim1,Trpv4,Vps41
GO Molecular Function	GO:0004045	aminoacyl-tRNA hydrolase activity	408	0.0955141	1	0.761771	9.96154	0.100386	1	4.78029e-05	0.00047619	935	0.364405	1	1	2.37754	0.420602	1	3	0.000352734	0.333333	region_87	Ptrh2
GO Molecular Function	GO:0016757	transferase activity, transferring glycosyl groups	409	0.0956481	1	0.760976	1.18513	54.8463	65	0.0261173	0.0309524	220	0.0401136	1	0.593317	1.29423	34.7698	45	248	0.015873	0.181452	region_1023,region_1030,region_1042,region_1043,region_1044,region_1134,region_1135,region_1145,region_1201,region_1286,region_1302,region_1353,region_1375,region_1376,region_1377,region_1378,region_1385,region_1391,region_1484,region_1485,region_1574,region_1599,region_1602,region_1648,region_1671,region_1672,region_1673,region_1692,region_17,region_1812,region_1840,region_1873,region_1874,regio…	A4galt,AI480653,Adnp,Agl,Alg10b,Alg6,B3galt1,B3gnt2,B3gnt7,B4galnt3,B4galnt4,B4galt1,C1galt1,C85492,Dpm1,Ext1,Fut8,Galnt7,Gcnt2,Gcnt4,Glt1d1,Glt28d2,Gtdc1,Gxylt1,Large,Nampt,Parp11,Parp12,Parp14,Parp9,Pigm,Pnp2,Rpn1,St8sia1,St8sia3,St8sia4,St8sia6,Stt3b,Tnks,Ugcg,Umps,Upp2,Wbscr17,Wdfy3,Xylt1
GO Molecular Function	GO:0050308	sugar-phosphatase activity	410	0.0959561	1	0.761564	2.77242	1.08209	3	0.00051528	0.00142857	218	0.0401114	1	0.598728	2.85305	1.40201	4	10	0.00141094	0.4	region_1029,region_1352,region_318	9630033F20Rik,Fbp1,Fbp2,Pfkfb3
GO Molecular Function	GO:0046943	carboxylic acid transmembrane transporter activity	411	0.0960361	1	0.760344	1.34048	17.9041	24	0.00852576	0.0114286	211	0.0343073	1	0.529081	1.54	12.3377	19	88	0.00670194	0.215909	region_1254,region_1260,region_1501,region_1598,region_16,region_1618,region_1756,region_1769,region_178,region_1904,region_1912,region_1962,region_2066,region_247,region_248,region_249,region_464,region_529,region_568,region_780,region_781,region_916,region_917,region_918	Nat3,Oca2,Serinc1,Slc10a7,Slc15a4,Slc16a7,Slc1a3,Slc1a4,Slc25a13,Slc38a2,Slc3a2,Slc7a1,Slc7a11,Slc7a14,Slc7a5,Slc7a7,Slc7a9,Slco2a1,Slco4a1
GO Molecular Function	GO:0005319	lipid transporter activity	412	0.096226	1	0.759999	1.44437	11.0775	16	0.00527498	0.00761905	200	0.0301715	1	0.490891	1.78316	6.72964	12	48	0.0042328	0.25	region_1256,region_1307,region_1308,region_1552,region_1553,region_1582,region_1583,region_1584,region_1588,region_1770,region_1771,region_2060,region_2066,region_687,region_91,region_961	Abca4,Abcg8,Atp10a,Atp10d,Atp11b,Atp8a1,Gltp,Pctp,Pitpnb,Plekha8,Plscr1,Slco2a1
GO Molecular Function	GO:0004055	argininosuccinate synthase activity	413	0.0981829	1	0.773576	9.67671	0.103341	1	4.921e-05	0.00047619	385	0.140201	1	1	7.13263	0.140201	1	1	0.000352734	1	region_183	Ass1
GO Molecular Function	GO:0004504	peptidylglycine monooxygenase activity	414	0.0982165	1	0.771972	3.80121	0.526149	2	0.000250547	0.000952381	385	0.140201	1	1	7.13263	0.140201	1	1	0.000352734	1	region_1147,region_1148	Pam
GO Molecular Function	GO:0004598	peptidylamidoglycolate lyase activity	414	0.0982165	1	0.771972	3.80121	0.526149	2	0.000250547	0.000952381	385	0.140201	1	1	7.13263	0.140201	1	1	0.000352734	1	region_1147,region_1148	Pam
GO Molecular Function	GO:0016830	carbon-carbon lyase activity	416	0.098594	1	0.771214	1.57007	7.00604	11	0.00333621	0.00523809	1296	0.571605	1	1	0.99525	6.02863	6	43	0.0021164	0.139535	region_10,region_1041,region_1094,region_11,region_2079,region_2080,region_613,region_614,region_615,region_616,region_732	Clybl,Ddc,Dera,Gadl1,Umps,Uxs1
GO Molecular Function	GO:0001621	ADP receptor activity	417	0.0992696	1	0.774636	9.56511	0.104547	1	4.97841e-05	0.00047619	385	0.140201	1	1	7.13263	0.140201	1	1	0.000352734	1	region_1270	P2ry12
GO Molecular Function	GO:0019902	phosphatase binding	418	0.0993826	1	0.773663	1.35397	16.2486	22	0.00773742	0.0104762	146	0.0157429	1	0.350872	1.75572	9.11305	16	65	0.00564374	0.246154	region_1150,region_1151,region_1152,region_1177,region_1535,region_1659,region_1788,region_2016,region_2087,region_329,region_342,region_343,region_396,region_456,region_728,region_729,region_769,region_853,region_854,region_855,region_872,region_88	Akap1,Anapc4,Ap3b1,Bcl2,Cdh2,Ctnnb1,Dlg1,Ghr,Grin3a,Iqgap1,Pik3r1,Pstpip1,Sh3rf2,Smg7,Sod1,Strn3
GO Molecular Function	GO:0015111	iodide transmembrane transporter activity	419	0.100558	1	0.780945	9.43591	0.105978	1	5.04658e-05	0.00047619	385	0.140201	1	1	7.13263	0.140201	1	1	0.000352734	1	region_380	Slc26a4
GO Molecular Function	GO:0003860	3-hydroxyisobutyryl-CoA hydrolase activity	420	0.100583	1	0.77928	9.43342	0.106006	1	5.04791e-05	0.00047619	385	0.140201	1	1	7.13263	0.140201	1	1	0.000352734	1	region_1102	Hibch
GO Molecular Function	GO:0070853	myosin VI binding	421	0.10097	1	0.780419	9.39531	0.106436	1	5.06839e-05	0.00047619	385	0.140201	1	1	7.13263	0.140201	1	1	0.000352734	1	region_1615	Lmtk2
GO Molecular Function	GO:0015643	toxin binding	422	0.101494	1	0.782609	3.72688	0.536642	2	0.000255544	0.000952381	644	0.200718	1	1	2.37754	0.841205	2	6	0.000705467	0.333333	region_1040,region_183	Ass1,Gucy2c
GO Molecular Function	GO:0015175	neutral amino acid transmembrane transporter activity	423	0.10165	1	0.78196	2.04388	2.44632	5	0.00116492	0.00238095	876	0.271631	1	1	1.50161	2.66382	4	19	0.00141094	0.210526	region_16,region_1756,region_178,region_780,region_781	Serinc1,Slc1a4,Slc3a2,Slc7a9
GO Molecular Function	GO:0016277	[myelin basic protein]-arginine N-methyltransferase activity	424	0.101899	1	0.782024	9.30497	0.107469	1	5.1176e-05	0.00047619	385	0.140201	1	1	7.13263	0.140201	1	1	0.000352734	1	region_1941	Prmt7
GO Molecular Function	GO:0030676	Rac guanyl-nucleotide exchange factor activity	425	0.102206	1	0.782534	2.0403	2.45062	5	0.00116696	0.00238095	301	0.0893486	1	0.965915	2.67474	1.12161	3	8	0.0010582	0.375	region_1066,region_1067,region_1301,region_29,region_30	Dock2,Prex2,Vav3
GO Molecular Function	GO:0016428	tRNA (cytosine-5-)-methyltransferase activity	426	0.102596	1	0.783677	9.23822	0.108246	1	5.15457e-05	0.00047619	385	0.140201	1	1	7.13263	0.140201	1	1	0.000352734	1	region_322	Nsun2
GO Molecular Function	GO:0042605	peptide antigen binding	427	0.102774	1	0.783198	3.69882	0.540713	2	0.000257483	0.000952381	1181	0.469711	1	1	1.29684	1.54221	2	11	0.000705467	0.181818	region_1756,region_40	Maml1,Slc7a9
GO Molecular Function	GO:0097001	ceramide binding	428	0.102832	1	0.781812	9.21579	0.108509	1	5.16712e-05	0.00047619	385	0.140201	1	1	7.13263	0.140201	1	1	0.000352734	1	region_332	Col4a3bp
GO Molecular Function	GO:0008802	betaine-aldehyde dehydrogenase activity	429	0.104288	1	0.791029	9.07994	0.110133	1	5.24443e-05	0.00047619	385	0.140201	1	1	7.13263	0.140201	1	1	0.000352734	1	region_885	Aldh7a1
GO Molecular Function	GO:0016417	S-acyltransferase activity	430	0.104359	1	0.789728	3.66477	0.545737	2	0.000259875	0.000952381	1309	0.596048	1	1	1.18877	0.841205	1	6	0.000352734	0.166667	region_233,region_234	Zdhhc17
GO Molecular Function	GO:0008387	steroid 7-alpha-hydroxylase activity	431	0.104468	1	0.788724	9.06332	0.110335	1	5.25404e-05	0.00047619	385	0.140201	1	1	7.13263	0.140201	1	1	0.000352734	1	region_648	Cyp39a1
GO Molecular Function	GO:0033782	24-hydroxycholesterol 7alpha-hydroxylase activity	431	0.104468	1	0.788724	9.06332	0.110335	1	5.25404e-05	0.00047619	385	0.140201	1	1	7.13263	0.140201	1	1	0.000352734	1	region_648	Cyp39a1
GO Molecular Function	GO:0070566	adenylyltransferase activity	433	0.104588	1	0.785981	2.02519	2.4689	5	0.00117567	0.00238095	1476	0.767793	1	1	0.750803	2.66382	2	19	0.000705467	0.105263	region_1177,region_1178,region_1179,region_1320,region_1321	Nmnat2,Papss1
GO Molecular Function	GO:0004484	mRNA guanylyltransferase activity	434	0.104605	1	0.784295	3.65955	0.546515	2	0.000260245	0.000952381	385	0.140201	1	1	7.13263	0.140201	1	1	0.000352734	1	region_1642,region_1643	Rngtt
GO Molecular Function	GO:0004651	polynucleotide 5'-phosphatase activity	434	0.104605	1	0.784295	3.65955	0.546515	2	0.000260245	0.000952381	385	0.140201	1	1	7.13263	0.140201	1	1	0.000352734	1	region_1642,region_1643	Rngtt
GO Molecular Function	GO:0005338	nucleotide-sugar transmembrane transporter activity	436	0.104823	1	0.782326	3.65494	0.547204	2	0.000260574	0.000952381	644	0.200718	1	1	2.37754	0.841205	2	6	0.000705467	0.333333	region_1302,region_939	Slc35a3,Slc35b4
GO Molecular Function	GO:0004965	GABA-B receptor activity	437	0.106349	1	0.7919	3.62309	0.552016	2	0.000262865	0.000952381	935	0.364405	1	1	2.37754	0.420602	1	3	0.000352734	0.333333	region_1654,region_1655	Gabbr2
GO Molecular Function	GO:0004135	amylo-alpha-1,6-glucosidase activity	438	0.106568	1	0.791719	8.87451	0.112682	1	5.36582e-05	0.00047619	385	0.140201	1	1	7.13263	0.140201	1	1	0.000352734	1	region_1302	Agl
GO Molecular Function	GO:0004134	4-alpha-glucanotransferase activity	438	0.106568	1	0.791719	8.87451	0.112682	1	5.36582e-05	0.00047619	385	0.140201	1	1	7.13263	0.140201	1	1	0.000352734	1	region_1302	Agl
GO Molecular Function	GO:0032404	mismatch repair complex binding	440	0.106599	1	0.788352	3.61793	0.552803	2	0.00026324	0.000952381	1056	0.366373	1	1	1.58503	1.26181	2	9	0.000705467	0.222222	region_691,region_692	Msh2,Msh6
GO Molecular Function	GO:0019166	trans-2-enoyl-CoA reductase (NADPH) activity	441	0.106793	1	0.787989	8.85477	0.112934	1	5.37778e-05	0.00047619	935	0.364405	1	1	2.37754	0.420602	1	3	0.000352734	0.333333	region_1122	Pecr
GO Molecular Function	GO:0051539	4 iron, 4 sulfur cluster binding	442	0.107546	1	0.79175	1.62879	5.52556	9	0.00263122	0.00428571	238	0.051103	1	0.698693	1.99714	3.50502	7	25	0.00246914	0.28	region_1082,region_1083,region_1303,region_1647,region_276,region_397,region_653,region_654,region_990	Aco1,Cdkal1,Dpyd,Mocs1,Nfu1,Nubpl,Prim2
GO Molecular Function	GO:0004331	fructose-2,6-bisphosphate 2-phosphatase activity	443	0.107743	1	0.79141	3.59459	0.556392	2	0.000264949	0.000952381	567	0.147006	1	0.843662	2.85305	0.701004	2	5	0.000705467	0.4	region_1029,region_1352	9630033F20Rik,Pfkfb3
GO Molecular Function	GO:0017147	Wnt-protein binding	444	0.107764	1	0.789784	1.5811	6.32472	10	0.00301177	0.00476191	93	0.00505222	1	0.176773	2.56775	3.50502	9	25	0.0031746	0.36	region_1110,region_1119,region_1282,region_1507,region_1608,region_1855,region_2066,region_308,region_309,region_491	Fzd1,Fzd5,Fzd6,Fzd7,Fzd9,Ror2,Ryk,Sfrp1,Sfrp2
GO Molecular Function	GO:0004021	L-alanine:2-oxoglutarate aminotransferase activity	445	0.108059	1	0.790163	8.74494	0.114352	1	5.44532e-05	0.00047619	734	0.260751	1	1	3.56631	0.280402	1	2	0.000352734	0.5	region_1919	Gpt2
GO Molecular Function	GO:0005232	serotonin-activated cation-selective channel activity	446	0.108146	1	0.789028	8.73748	0.114449	1	5.44997e-05	0.00047619	734	0.260751	1	1	3.56631	0.280402	1	2	0.000352734	0.5	region_2005	Htr3a
GO Molecular Function	GO:0003868	4-hydroxyphenylpyruvate dioxygenase activity	447	0.108438	1	0.789393	8.71249	0.114778	1	5.46561e-05	0.00047619	734	0.260751	1	1	3.56631	0.280402	1	2	0.000352734	0.5	region_1594	Hpd
GO Molecular Function	GO:0034483	heparan sulfate sulfotransferase activity	448	0.108843	1	0.790569	1.53932	7.14603	11	0.00340287	0.00523809	42	0.000207471	0.675109	0.016074	4.53895	1.54221	7	11	0.00246914	0.636364	region_1331,region_1332,region_160,region_161,region_1818,region_54,region_55,region_56,region_57,region_636,region_886	Hs2st1,Hs3st2,Hs3st3a1,Hs3st3b1,Hs3st5,Hs3st6,Ndst1
GO Molecular Function	GO:0047522	15-oxoprostaglandin 13-oxidase activity	449	0.109882	1	0.796339	8.59121	0.116398	1	5.54276e-05	0.00047619	734	0.260751	1	1	3.56631	0.280402	1	2	0.000352734	0.5	region_422	Ptgr2
GO Molecular Function	GO:0071820	N-box binding	450	0.109927	1	0.794894	3.551	0.563222	2	0.000268201	0.000952381	385	0.140201	1	1	7.13263	0.140201	1	1	0.000352734	1	region_723,region_724	Hes1
GO Molecular Function	GO:0030284	estrogen receptor activity	451	0.110608	1	0.798042	2.60005	1.15382	3	0.000549439	0.00142857	1114	0.453529	1	1	1.78316	0.560803	1	4	0.000352734	0.25	region_1316,region_1317,region_1318	Lef1
GO Molecular Function	GO:0035615	clathrin adaptor activity	452	0.110789	1	0.797583	8.51662	0.117417	1	5.59131e-05	0.00047619	385	0.140201	1	1	7.13263	0.140201	1	1	0.000352734	1	region_1728	Ldlrap1
GO Molecular Function	GO:0000014	single-stranded DNA specific endodeoxyribonuclease activity	453	0.111017	1	0.797457	2.20409	1.81481	4	0.000864196	0.00190476	317	0.0970323	1	0.996035	3.56631	0.560803	2	4	0.000705467	0.5	region_708,region_709,region_710,region_847	Ercc4,Rbbp8
GO Molecular Function	GO:0008192	RNA guanylyltransferase activity	454	0.11125	1	0.797374	3.52521	0.567341	2	0.000270163	0.000952381	734	0.260751	1	1	3.56631	0.280402	1	2	0.000352734	0.5	region_1642,region_1643	Rngtt
GO Molecular Function	GO:0035173	histone kinase activity	455	0.111303	1	0.796002	2.20194	1.81658	4	0.000865037	0.00190476	348	0.0970577	1	0.907546	2.19466	1.82261	4	13	0.00141094	0.307692	region_102,region_1697,region_1819,region_807	Jak2,Prkaa2,Prkca,Prkcb
GO Molecular Function	GO:0047757	chondroitin-glucuronate 5-epimerase activity	456	0.111637	1	0.796636	8.448	0.118371	1	5.63672e-05	0.00047619	385	0.140201	1	1	7.13263	0.140201	1	1	0.000352734	1	region_158	Dse
GO Molecular Function	GO:0008440	inositol trisphosphate 3-kinase activity	457	0.112114	1	0.798289	2.58403	1.16098	3	0.000552847	0.00142857	714	0.256141	1	1	2.03789	0.981406	2	7	0.000705467	0.285714	region_2069,region_2070,region_2071	Ip6k1,Ip6k2
GO Molecular Function	GO:0004596	peptide alpha-N-acetyltransferase activity	458	0.112257	1	0.797565	3.5059	0.570468	2	0.000271651	0.000952381	567	0.147006	1	0.843662	2.85305	0.701004	2	5	0.000705467	0.4	region_1569,region_563	Naa11,Naa30
GO Molecular Function	GO:0015179	L-amino acid transmembrane transporter activity	459	0.112371	1	0.796638	1.56698	6.38171	10	0.00303891	0.00476191	312	0.0937905	1	0.978187	1.67826	4.76683	8	34	0.00282187	0.235294	region_1598,region_16,region_1618,region_178,region_1904,region_1962,region_464,region_916,region_917,region_918	Nat3,Serinc1,Slc15a4,Slc1a3,Slc1a4,Slc25a13,Slc7a1,Slc7a5
GO Molecular Function	GO:0000254	C-4 methylsterol oxidase activity	460	0.112848	1	0.798276	8.35176	0.119735	1	5.70168e-05	0.00047619	385	0.140201	1	1	7.13263	0.140201	1	1	0.000352734	1	region_1900	Sc4mol
GO Molecular Function	GO:0010485	H4 histone acetyltransferase activity	461	0.112951	1	0.797274	8.34363	0.119852	1	5.70723e-05	0.00047619	935	0.364405	1	1	2.37754	0.420602	1	3	0.000352734	0.333333	region_49	Usp22
GO Molecular Function	GO:0046582	Rap GTPase activator activity	462	0.113212	1	0.797388	2.57251	1.16617	3	0.000555321	0.00142857	385	0.140201	1	1	7.13263	0.140201	1	1	0.000352734	1	region_1278,region_1279,region_1280	Rapgef2
GO Molecular Function	GO:0008119	thiopurine S-methyltransferase activity	463	0.113467	1	0.797452	8.30337	0.120433	1	5.7349e-05	0.00047619	734	0.260751	1	1	3.56631	0.280402	1	2	0.000352734	0.5	region_341	Ocln
GO Molecular Function	GO:0031700	adrenomedullin receptor binding	464	0.11416	1	0.8006	8.24973	0.121216	1	5.77219e-05	0.00047619	385	0.140201	1	1	7.13263	0.140201	1	1	0.000352734	1	region_1803	Adm
GO Molecular Function	GO:0046527	glucosyltransferase activity	465	0.114282	1	0.799727	2.18006	1.83481	4	0.000873719	0.00190476	1181	0.469711	1	1	1.29684	1.54221	2	11	0.000705467	0.181818	region_1671,region_1672,region_1673,region_1692	Alg6,Ugcg
GO Molecular Function	GO:0034212	peptide N-acetyltransferase activity	466	0.115629	1	0.807417	3.44303	0.580884	2	0.000276611	0.000952381	644	0.200718	1	1	2.37754	0.841205	2	6	0.000705467	0.333333	region_1569,region_563	Naa11,Naa30
GO Molecular Function	GO:0016715	oxidoreductase activity, acting on paired donors, with incorporation or reduction of molecular oxygen, reduced ascorbate as one donor, and incorporation of one atom of oxygen	467	0.116948	1	0.814879	2.53443	1.1837	3	0.000563666	0.00142857	317	0.0970323	1	0.996035	3.56631	0.560803	2	4	0.000705467	0.5	region_1147,region_1148,region_147	Moxd1,Pam
GO Molecular Function	GO:0003684	damaged DNA binding	468	0.117966	1	0.820214	1.59465	5.64389	9	0.00268757	0.00428571	693	0.23329	1	1	1.3869	5.04723	7	36	0.00246914	0.194444	region_1089,region_1665,region_691,region_692,region_708,region_709,region_710,region_847,region_97	Brca1,Ercc4,Msh2,Msh6,Rad23b,Rbbp8,Rev1
GO Molecular Function	GO:0016742	hydroxymethyl-, formyl- and related transferase activity	469	0.118448	1	0.821813	3.39252	0.589533	2	0.00028073	0.000952381	891	0.311738	1	1	1.78316	1.12161	2	8	0.000705467	0.25	region_1121,region_995	Aldh1l1,Atic
GO Molecular Function	GO:0048037	cofactor binding	470	0.11877	1	0.822292	1.19168	42.7969	51	0.0203795	0.0242857	1104	0.426605	1	1	1.03747	38.5552	40	275	0.0141093	0.145454	region_10,region_1094,region_11,region_1108,region_1317,region_1318,region_1340,region_1341,region_1374,region_1414,region_1508,region_1509,region_1548,region_1731,region_1766,region_1776,region_1827,region_1828,region_1865,region_1866,region_188,region_1894,region_1919,region_1947,region_1948,region_2,region_20,region_2001,region_2002,region_2046,region_2079,region_2080,region_252,region_274,reg…	4931429L15Rik,Aadat,Accsl,Aldh1a3,Aldh1l1,Aldh5a1,Aox3,Aox4,Asns,Cryz,Ctbp2,Ddc,Gadl1,Gapdh,Gclc,Gm6756,Gmds,Gpt2,Hadh,Hhipl1,Hibadh,Hmgcr,Hps1,Htatip2,Kdm1a,Kynu,Ldhd,Mocos,Nox3,Oat,Ogdh,Psat1,Sirt1,Srd5a1,Steap1,Steap2,Suox,Thnsl2,Ugdh,Uxs1
GO Molecular Function	GO:0008116	prostaglandin-I synthase activity	471	0.119016	1	0.822246	7.89191	0.126712	1	6.0339e-05	0.00047619	385	0.140201	1	1	7.13263	0.140201	1	1	0.000352734	1	region_1483	Ptgis
GO Molecular Function	GO:0035033	histone deacetylase regulator activity	472	0.120438	1	0.830306	3.35792	0.595606	2	0.000283622	0.000952381	1114	0.453529	1	1	1.78316	0.560803	1	4	0.000352734	0.25	region_52,region_53	Ncor1
GO Molecular Function	GO:0004478	methionine adenosyltransferase activity	473	0.120915	1	0.831835	7.75977	0.12887	1	6.13666e-05	0.00047619	734	0.260751	1	1	3.56631	0.280402	1	2	0.000352734	0.5	region_978	Mat2a
GO Molecular Function	GO:0030515	snoRNA binding	474	0.120933	1	0.830204	2.4955	1.20216	3	0.00057246	0.00142857	603	0.154978	1	0.836317	2.13979	1.40201	3	10	0.0010582	0.3	region_1111,region_589,region_827	Nolc1,Nop58,Nufip1
GO Molecular Function	GO:0003855	3-dehydroquinate dehydratase activity	475	0.12172	1	0.833846	7.705	0.129786	1	6.18028e-05	0.00047619	385	0.140201	1	1	7.13263	0.140201	1	1	0.000352734	1	region_1184	Tor3a
GO Molecular Function	GO:0008900	hydrogen:potassium-exchanging ATPase activity	476	0.122384	1	0.836631	7.66038	0.130542	1	6.21628e-05	0.00047619	734	0.260751	1	1	3.56631	0.280402	1	2	0.000352734	0.5	region_569	Atp12a
GO Molecular Function	GO:0004437	inositol or phosphatidylinositol phosphatase activity	477	0.122649	1	0.836688	1.58028	5.6952	9	0.002712	0.00428571	199	0.0276729	1	0.4525	2.11337	3.78542	8	27	0.00282187	0.296296	region_1,region_1137,region_1837,region_1915,region_1974,region_770,region_811,region_812,region_813	Inpp4b,Inpp5a,Inpp5d,Minpp1,Mtmr2,Mtmr3,Pten,Synj1
GO Molecular Function	GO:0016229	steroid dehydrogenase activity	478	0.122909	1	0.836704	1.79167	3.34884	6	0.00159468	0.00285714	1199	0.472284	1	1	1.11447	4.48642	5	32	0.00176367	0.15625	region_1394,region_1764,region_1955,region_321,region_944,region_945	Akr1d1,Dhrs9,Hsd17b14,Sdr42e1,Srd5a1
GO Molecular Function	GO:0055100	adiponectin binding	479	0.12311	1	0.836325	2.47493	1.21216	3	0.000577217	0.00142857	385	0.140201	1	1	7.13263	0.140201	1	1	0.000352734	1	region_1956,region_1957,region_1958	Cdh13
GO Molecular Function	GO:0000287	magnesium ion binding	480	0.123118	1	0.834637	1.21103	34.6812	42	0.0165149	0.02	230	0.0422185	1	0.5973	1.3586	23.5537	32	168	0.0112875	0.190476	region_1089,region_1184,region_1216,region_1217,region_1256,region_1399,region_1480,region_1481,region_1539,region_1552,region_1553,region_1613,region_1614,region_1639,region_1640,region_1718,region_1733,region_1770,region_1771,region_1951,region_2011,region_2046,region_2047,region_242,region_281,region_344,region_345,region_346,region_347,region_413,region_429,region_485,region_642,region_691,re…	Abl2,Atp10a,Atp10d,Atp11b,Atp8a1,B230120H23Rik,Dyrk2,Eya2,Fars2,Foxk1,Gclc,Gm5506,Ick,Map3k7,Mark1,Mark2,Mast4,Msh2,Msh6,Nudt7,Pgm1,Pink1,Ppm1a,Pten,Rev1,Rps6ka4,Rps6ka5,Sik1,Sik2,Snca,Stk3,Tssk3
GO Molecular Function	GO:0000978	RNA polymerase II core promoter proximal region sequence-specific DNA binding	481	0.123242	1	0.83374	1.63149	4.90349	8	0.00233499	0.00380952	105	0.0073566	1	0.227984	3.56631	1.40201	5	10	0.00176367	0.5	region_1911,region_285,region_286,region_539,region_540,region_896,region_897,region_926	Fezf1,Fezf2,Pou4f2,Tcf4,Tcfap2a
GO Molecular Function	GO:0008391	arachidonic acid monooxygenase activity	482	0.123543	1	0.834042	7.58361	0.131863	1	6.2792e-05	0.00047619	935	0.364405	1	1	2.37754	0.420602	1	3	0.000352734	0.333333	region_825	Cyp2c44
GO Molecular Function	GO:0004519	endonuclease activity	483	0.123927	1	0.834902	1.38593	11.5446	16	0.00549743	0.00761905	1595	0.940279	1	1	0.672889	14.8613	10	106	0.00352734	0.0943396	region_1415,region_1713,region_280,region_475,region_476,region_510,region_511,region_566,region_567,region_595,region_596,region_597,region_708,region_709,region_710,region_847	Dis3,Drosha,Eif2c2,Ercc4,Rag1,Rbbp8,Rnase1,Rnase10,Rpp40,Zc3h12a
GO Molecular Function	GO:0046906	tetrapyrrole binding	484	0.124122	1	0.834491	1.28894	19.3958	25	0.00923609	0.0119048	1468	0.747627	1	1	0.891579	23.5537	21	168	0.00740741	0.125	region_1080,region_1244,region_1319,region_1373,region_1483,region_1506,region_1856,region_1857,region_1942,region_1943,region_2013,region_2014,region_252,region_437,region_513,region_648,region_677,region_807,region_817,region_819,region_825,region_947,region_948,region_954,region_987	Cyb5b,Cycs,Cyp19a1,Cyp1b1,Cyp26a1,Cyp26b1,Cyp2c44,Cyp2c70,Cyp2u1,Cyp39a1,Cyp46a1,Cyp51,Cyp7b1,Ido2,Jak2,Lmbrd1,Mb,Ptgis,Ptgs1,Suox,Tbxas1
GO Molecular Function	GO:0046982	protein heterodimerization activity	485	0.124627	1	0.836156	1.13919	73.7365	84	0.0351126	0.04	60	0.00126087	1	0.0683814	1.4904	37.5738	56	268	0.0197531	0.208955	region_0,region_1008,region_1009,region_1010,region_1011,region_1038,region_1045,region_1046,region_1120,region_1144,region_1150,region_1151,region_1152,region_1194,region_1216,region_1217,region_1218,region_1219,region_1226,region_1231,region_1271,region_1276,region_1277,region_1368,region_1409,region_1438,region_1462,region_1463,region_1495,region_1507,region_1514,region_1546,region_157,region_…	Abcg8,Adra2a,Bard1,Bcl2,Bdkrb2,Bnip3l,Bok,Cabyr,Dmbx1,Epas1,Ext1,Foxp1,Fzd1,Fzd9,Gclc,Grin2b,Gtf2a1,Hgf,Hif1a,Hnf1b,Il12a,Limk2,Ltc4s,Max,Myc,Neurod1,Nr3c2,P2ry1,Panx1,Pbx1,Pbx3,Pola1,Pvrl1,Rab3gap2,Ralgapa2,Rims2,Robo1,Rragc,Scube1,Sox5,Sox6,Syt10,Syt14,Tbx18,Tcf12,Tcf4,Tgfb2,Tlr1,Tpd52,Tpd52l1,Twist1,Tyro3,Tyrp1,Vapb,Vegfa,Zfp423
GO Molecular Function	GO:0034713	type I transforming growth factor beta receptor binding	486	0.126296	1	0.84561	2.09828	1.90632	4	0.000907773	0.00190476	567	0.147006	1	0.843662	2.85305	0.701004	2	5	0.000705467	0.4	region_2024,region_898,region_899,region_900	Smad2,Smad6
GO Molecular Function	GO:0008013	beta-catenin binding	487	0.127363	1	0.851002	1.27766	20.3498	26	0.00969036	0.0123809	190	0.0246471	1	0.422115	1.78316	7.29044	13	52	0.00458554	0.25	region_103,region_1038,region_104,region_107,region_108,region_109,region_110,region_1245,region_1246,region_1247,region_1316,region_1317,region_1318,region_1926,region_1927,region_2024,region_41,region_828,region_837,region_838,region_853,region_854,region_855,region_866,region_979,region_980	Axin2,Cdh2,Ctnna1,Grin2b,Lef1,Sall1,Smad3,Sox9,Sufu,Tbl1xr1,Tcf7,Tcf7l1,Tcf7l2
GO Molecular Function	GO:0030487	inositol-4,5-bisphosphate 5-phosphatase activity	488	0.127415	1	0.849606	7.33727	0.136291	1	6.49003e-05	0.00047619	385	0.140201	1	1	7.13263	0.140201	1	1	0.000352734	1	region_1137	Inpp5d
GO Molecular Function	GO:0003730	mRNA 3'-UTR binding	489	0.127455	1	0.84814	1.8975	2.63504	5	0.00125478	0.00238095	887	0.305038	1	1	1.42653	2.80402	4	20	0.00141094	0.2	region_1340,region_1341,region_299,region_307,region_699	Auh,Carhsp1,Cryz,Rbm24
GO Molecular Function	GO:0047134	protein-disulfide reductase activity	490	0.12844	1	0.852946	7.27453	0.137466	1	6.546e-05	0.00047619	734	0.260751	1	1	3.56631	0.280402	1	2	0.000352734	0.5	region_68	Nxn
GO Molecular Function	GO:0004463	leukotriene-A4 hydrolase activity	491	0.128531	1	0.85181	7.26902	0.13757	1	6.55096e-05	0.00047619	385	0.140201	1	1	7.13263	0.140201	1	1	0.000352734	1	region_216	Lta4h
GO Molecular Function	GO:0019955	cytokine binding	492	0.128615	1	0.850638	1.316	15.9575	21	0.00759882	0.01	881	0.280635	1	1	1.17652	13.5995	16	97	0.00564374	0.164948	region_1017,region_1076,region_1077,region_1163,region_1164,region_1276,region_1277,region_1385,region_139,region_1557,region_1558,region_1578,region_1579,region_23,region_24,region_456,region_460,region_466,region_658,region_771,region_90	Acvr1,Cxcr4,Ebi3,Ghr,Ifnar1,Ifngr1,Il10rb,Il12a,Il17f,Il5ra,Il9r,Kit,Lifr,Nog,Prlr,Tgfbr3
GO Molecular Function	GO:0019894	kinesin binding	493	0.129146	1	0.852413	1.88912	2.64674	5	0.00126035	0.00238095	278	0.0620638	1	0.726459	2.22895	2.24321	5	16	0.00176367	0.3125	region_120,region_1531,region_186,region_562,region_965	2510003E04Rik,Actg1,Jakmip1,Ktn1,Snca
GO Molecular Function	GO:0043398	HLH domain binding	494	0.129379	1	0.852228	7.2179	0.138544	1	6.59735e-05	0.00047619	734	0.260751	1	1	3.56631	0.280402	1	2	0.000352734	0.5	region_188	Sirt1
GO Molecular Function	GO:0004407	histone deacetylase activity	495	0.129564	1	0.85172	1.67638	4.17567	7	0.00198842	0.00333333	315	0.0962294	1	0.994065	1.98129	2.52361	5	18	0.00176367	0.277778	region_160,region_161,region_1736,region_188,region_1926,region_1927,region_384	Arhgef10l,Hdac2,Hdac9,Sall1,Sirt1
GO Molecular Function	GO:0003896	DNA primase activity	496	0.13037	1	0.855288	2.4096	1.24502	3	0.000592867	0.00142857	317	0.0970323	1	0.996035	3.56631	0.560803	2	4	0.000705467	0.5	region_1082,region_1083,region_2095	Pola1,Prim2
GO Molecular Function	GO:0048020	CCR chemokine receptor binding	497	0.130771	1	0.856194	2.07016	1.93221	4	0.000920101	0.00190476	1528	0.83687	1	1	0.594386	1.68241	1	12	0.000352734	0.0833333	region_78,region_79,region_80,region_81	Ccl2
GO Molecular Function	GO:0035254	glutamate receptor binding	498	0.130823	1	0.854815	1.48196	7.4226	11	0.00353457	0.00523809	913	0.325613	1	1	1.32086	3.78542	5	27	0.00176367	0.185185	region_1038,region_1468,region_1469,region_1496,region_2087,region_701,region_702,region_703,region_704,region_705,region_706	Ctnnb1,Gnas,Grin2a,Grin2b,Tmem90b
GO Molecular Function	GO:0003840	gamma-glutamyltransferase activity	499	0.131347	1	0.856517	7.10194	0.140807	1	6.70507e-05	0.00047619	1114	0.453529	1	1	1.78316	0.560803	1	4	0.000352734	0.25	region_65	Ggt6
GO Molecular Function	GO:0015269	calcium-activated potassium channel activity	500	0.131675	1	0.856938	1.60446	4.98609	8	0.00237433	0.00380952	233	0.0480381	1	0.670884	2.37754	2.10301	5	15	0.00176367	0.333333	region_1175,region_1254,region_1862,region_1863,region_239,region_240,region_550,region_551	Kcnma1,Kcnmb2,Kcnmb4,Kcnt2,Kcnu1
GO Biological Process	GO:0008152	metabolic process	1	5.28497e-32	4.53609e-28	4.53609e-28	1.24192	1099.91	1366	0.523766	0.650476	152	1.72193e-09	1.47793e-05	9.72324e-08	1.13224	1081.93	1225	7717	0.432099	0.15874	region_0,region_1,region_10,region_100,region_1000,region_1001,region_1002,region_1007,region_1008,region_1009,region_1010,region_1011,region_1012,region_1013,region_1014,region_1015,region_1016,region_1018,region_1019,region_102,region_1020,region_1021,region_1025,region_1026,region_1029,region_103,region_1033,region_1034,region_1035,region_1036,region_1037,region_1039,region_104,region_1040,reg…	1110020G09Rik,1110034B05Rik,1500015O10Rik,1700071K01Rik,1700106N22Rik,2310030N02Rik,2310035K24Rik,4833442J19Rik,4931429L15Rik,6330577E15Rik,6430598A04Rik,9630033F20Rik,A4galt,A930038C07Rik,AW146020,Aadat,Aak1,Abca13,Abca4,Abcb5,Abcc2,Abcc4,Abcg8,Abl2,Abra,Accsl,Acer2,Aco1,Acsl4,Acvr1,Adad2,Adam12,Adam19,Adam32,Adam9,Adamts16,Adamts18,Adamts9,Adat1,Adc,Adcy1,Adcy3,Adcy5,Adcy8,Adm,Adnp,Adra2a,Adsl,…
GO Biological Process	GO:0044237	cellular metabolic process	2	1.94916e-30	1.67296e-26	8.36481e-27	1.26652	980.643	1242	0.466973	0.591429	92	7.2511e-13	6.22362e-09	6.76481e-11	1.18044	919.997	1086	6562	0.383069	0.165498	region_0,region_1,region_10,region_100,region_1007,region_1008,region_1009,region_1010,region_1011,region_1012,region_1013,region_1014,region_1015,region_1016,region_1018,region_1019,region_102,region_1020,region_1021,region_1025,region_1026,region_1029,region_103,region_1033,region_1034,region_1035,region_1036,region_1037,region_1039,region_104,region_1040,region_1041,region_1042,region_1043,reg…	1110020G09Rik,1110034B05Rik,1500015O10Rik,1700071K01Rik,1700106N22Rik,2310035K24Rik,4833442J19Rik,6330577E15Rik,6430598A04Rik,A930038C07Rik,AW146020,Aadat,Aak1,Abca13,Abca4,Abcb5,Abcc2,Abcc4,Abcg8,Abl2,Abra,Accsl,Acer2,Aco1,Acsl4,Acvr1,Adad2,Adam9,Adat1,Adc,Adcy1,Adcy3,Adcy5,Adcy8,Adm,Adnp,Adra2a,Adsl,Aff1,Aff3,Agl,Agpat3,Agpat4,Agtpbp1,Ahctf1,Ahcyl1,Akap1,Akap2,Akap7,Akr1d1,Akt2,Aldh1a2,Aldh1a3,…
GO Biological Process	GO:0044238	primary metabolic process	3	1.64521e-29	1.41208e-25	4.70695e-26	1.25939	990.953	1248	0.471882	0.594286	128	1.75722e-10	1.50823e-06	1.1783e-08	1.15664	944.112	1092	6734	0.385185	0.162162	region_0,region_1,region_10,region_100,region_1000,region_1001,region_1002,region_1007,region_1008,region_1009,region_1010,region_1011,region_1012,region_1013,region_1014,region_1015,region_1016,region_1018,region_1019,region_102,region_1020,region_1021,region_1025,region_1026,region_1029,region_103,region_1033,region_1034,region_1035,region_1036,region_1037,region_1039,region_104,region_1040,reg…	1110034B05Rik,1500015O10Rik,1700071K01Rik,2310035K24Rik,4833442J19Rik,6330577E15Rik,A4galt,A930038C07Rik,AW146020,Aadat,Aak1,Abca13,Abca4,Abcb5,Abcc2,Abcc4,Abcg8,Abl2,Abra,Accsl,Acer2,Acsl4,Acvr1,Adad2,Adam12,Adam19,Adam32,Adam9,Adamts16,Adamts18,Adamts9,Adat1,Adc,Adcy1,Adcy3,Adcy5,Adcy8,Adm,Adnp,Adra2a,Adsl,Aff1,Aff3,Agl,Agpat3,Agpat4,Agtpbp1,Ahctf1,Ahcyl1,Akap7,Akr1d1,Akt2,Aldh1a2,Aldh1a3,Aldh5…
GO Biological Process	GO:0060255	regulation of macromolecule metabolic process	4	2.43435e-25	2.0894e-21	5.2235e-22	1.34382	656.338	882	0.312542	0.42	31	2.51497e-19	2.1586e-15	6.96322e-17	1.34275	510.892	686	3644	0.241975	0.188255	region_10,region_100,region_1007,region_1008,region_1009,region_1010,region_1011,region_1012,region_1013,region_1014,region_1015,region_1016,region_1018,region_102,region_1020,region_1021,region_1025,region_1028,region_1029,region_103,region_1030,region_1033,region_1034,region_1035,region_1036,region_1039,region_104,region_1045,region_1046,region_105,region_1050,region_1053,region_1058,region_105…	1700071K01Rik,4930447C04Rik,5033414D02Rik,5730507C01Rik,AK011498,AW146020,AW146154,Aak1,Abra,Acer2,Aco1,Acvr1,Adam9,Adnp,Adra2a,Aff1,Aff3,Ahctf1,Ahcyl1,Akap1,Akt2,Aldh1a2,Alkbh3,Angpt1,Anxa3,Apbb2,Arid2,Arid4b,Arid5b,Arntl,Asxl1,Atf6,Atf7ip,Atg10,Atg5,Atoh1,Atoh7,Atxn1,Axin2,B230120H23Rik,BC096441,Bach2,Bambi,Barx2,Bbx,Bcl2,Bclaf1,Bcor,Bdkrb2,Bhlha15,Bhlhe23,Bhlhe40,Bmp3,Bmp7,Bmper,Bmpr2,Bnip3l,B…
GO Biological Process	GO:0065007	biological regulation	5	1.03636e-24	8.89512e-21	1.77902e-21	1.17409	1283.55	1507	0.611213	0.717619	295	1.14092e-05	0.0979255	0.000331951	1.08299	1260.4	1365	8990	0.481482	0.151835	region_10,region_100,region_1000,region_1001,region_1002,region_1007,region_1008,region_1009,region_101,region_1010,region_1011,region_1012,region_1013,region_1014,region_1015,region_1016,region_1017,region_1018,region_1019,region_102,region_1020,region_1021,region_1022,region_1025,region_1026,region_1027,region_1028,region_1029,region_103,region_1030,region_1031,region_1033,region_1034,region_10…	1500015O10Rik,1700071K01Rik,2810407C02Rik,4831426I19Rik,4930447C04Rik,4930474N05Rik,4930544G11Rik,5033414D02Rik,5430435G22Rik,5730507C01Rik,A830018L16Rik,A930038C07Rik,AK011498,AK053790,AW146020,AW146154,Aak1,Abcb5,Abcg8,Abl2,Abra,Acap2,Accn1,Acer2,Aco1,Acsl4,Actn4,Acvr1,Adam19,Adam9,Adamts9,Adcy1,Adcy3,Adcy5,Adcy8,Adcyap1,Adm,Adnp,Adra2a,Adrb3,Aen,Aff1,Aff3,Agfg2,Agtpbp1,Ahctf1,Ahcyl1,Akap1,Akap…
GO Biological Process	GO:0019222	regulation of metabolic process	6	1.23845e-24	1.06296e-20	1.7716e-21	1.29816	767.239	996	0.365352	0.474286	24	1.55465e-21	1.33436e-17	5.55983e-19	1.32631	604.686	802	4313	0.282892	0.185949	region_10,region_100,region_1007,region_1008,region_1009,region_101,region_1010,region_1011,region_1012,region_1013,region_1014,region_1015,region_1016,region_1018,region_102,region_1020,region_1021,region_1022,region_1025,region_1027,region_1028,region_1029,region_103,region_1030,region_1033,region_1034,region_1035,region_1036,region_1039,region_104,region_1045,region_1046,region_105,region_1050…	1700071K01Rik,4930447C04Rik,5033414D02Rik,5730507C01Rik,AK011498,AW146020,AW146154,Aak1,Abl2,Abra,Acap2,Acer2,Aco1,Acsl4,Acvr1,Adam9,Adcy1,Adcy3,Adcy5,Adcyap1,Adnp,Adra2a,Adrb3,Aff1,Aff3,Agfg2,Ahctf1,Ahcyl1,Akap1,Akt2,Aldh1a2,Alkbh3,Angpt1,Angptl3,Anxa3,Apbb2,Arfgap3,Arhgap10,Arhgap15,Arhgap18,Arhgap21,Arhgap24,Arhgap25,Arhgap26,Arhgap28,Arhgap29,Arhgap32,Arhgap42,Arhgap5,Arhgef19,Arid2,Arid4b,Ar…
GO Biological Process	GO:0080090	regulation of primary metabolic process	7	2.11058e-24	1.81151e-20	2.58787e-21	1.31649	709.461	934	0.337838	0.444762	18	3.75244e-23	3.22072e-19	1.78929e-20	1.3641	544.68	743	3885	0.262081	0.191248	region_10,region_100,region_1007,region_1008,region_1009,region_101,region_1010,region_1011,region_1012,region_1013,region_1014,region_1015,region_1016,region_1018,region_102,region_1020,region_1021,region_1022,region_1025,region_1027,region_1028,region_1029,region_103,region_1030,region_1033,region_1034,region_1035,region_1036,region_1039,region_104,region_1045,region_1046,region_105,region_1050…	1700071K01Rik,4930447C04Rik,5033414D02Rik,5730507C01Rik,AK011498,AW146020,AW146154,Abra,Acap2,Acer2,Aco1,Acsl4,Acvr1,Adam9,Adcy1,Adcy3,Adcy5,Adcyap1,Adnp,Adra2a,Adrb3,Aff1,Aff3,Agfg2,Ahctf1,Ahcyl1,Akap1,Akt2,Angpt1,Angptl3,Anxa3,Apbb2,Arfgap3,Arhgap10,Arhgap15,Arhgap18,Arhgap21,Arhgap24,Arhgap25,Arhgap26,Arhgap28,Arhgap29,Arhgap32,Arhgap42,Arhgap5,Arhgef19,Arid2,Arid4b,Arid5b,Arntl,Asap1,Asxl1,At…
GO Biological Process	GO:0048518	positive regulation of biological process	8	1.89473e-23	1.62624e-19	2.0328e-20	1.37052	561.832	770	0.267539	0.366667	10	1.01617e-27	8.7218e-24	8.7218e-25	1.51487	369.009	559	2632	0.197178	0.212386	region_10,region_100,region_1000,region_1001,region_1002,region_1007,region_1008,region_1009,region_101,region_1010,region_1011,region_1012,region_1013,region_1014,region_1015,region_102,region_1020,region_1025,region_1028,region_1029,region_103,region_1030,region_1038,region_1039,region_104,region_1042,region_1043,region_1044,region_1045,region_1046,region_105,region_1050,region_1053,region_1058…	1700071K01Rik,A930038C07Rik,Aak1,Abl2,Abra,Accn1,Acer2,Actn4,Acvr1,Adam9,Adamts9,Adm,Adnp,Adra2a,Adrb3,Aen,Aff1,Ahctf1,Ahcyl1,Akt2,Aldh1a2,Aldh1a3,Aldh3a1,Angpt1,Angptl3,Anxa2,Anxa3,Ap3b1,Apbb2,Aqp3,Arg1,Arhgap5,Arntl,Asns,Atf7ip,Atg10,Atoh1,Atxn1,Axin2,B230120H23Rik,B4galt1,BC096441,Baiap2l1,Bambi,Bard1,Barx2,Bbs4,Bcl2,Bcl2l11,Bclaf1,Becn1,Bhlha15,Bhlhe23,Bmp3,Bmp7,Bmper,Bmpr2,Bnip3l,Boc,Bok,Brc…
GO Biological Process	GO:0009987	cellular process	9	3.06985e-23	2.63485e-19	2.92761e-20	1.11504	1598.15	1782	0.761025	0.848571	329	3.34065e-05	0.286728	0.000871513	1.05486	1746.2	1842	12455	0.649735	0.147892	region_0,region_1,region_10,region_100,region_1007,region_1008,region_1009,region_101,region_1010,region_1011,region_1012,region_1013,region_1014,region_1015,region_1016,region_1017,region_1018,region_1019,region_102,region_1020,region_1021,region_1022,region_1023,region_1024,region_1025,region_1026,region_1027,region_1028,region_1029,region_103,region_1030,region_1033,region_1034,region_1035,reg…	1110020G09Rik,1110021L09Rik,1110034B05Rik,1190002N15Rik,1500015O10Rik,1700018B24Rik,1700071K01Rik,1700106N22Rik,1810011O10Rik,2010107G12Rik,2310035K24Rik,2510003E04Rik,2810021B07Rik,2810407C02Rik,4831426I19Rik,4833442J19Rik,4930528F23Rik,4930544G11Rik,5430435G22Rik,5830411N06Rik,6330577E15Rik,6430598A04Rik,A4galt,A830018L16Rik,A930038C07Rik,AK053790,AW146020,Aadat,Aak1,Abca13,Abca4,Abcb5,Abcc2,Ab…
GO Biological Process	GO:0031323	regulation of cellular metabolic process	10	3.94543e-23	3.38636e-19	3.38636e-20	1.30711	709.963	928	0.338078	0.441905	19	3.94586e-23	3.38673e-19	1.78249e-20	1.36465	542.998	741	3873	0.261376	0.191325	region_10,region_100,region_1007,region_1008,region_1009,region_101,region_1010,region_1011,region_1012,region_1013,region_1014,region_1015,region_1016,region_1018,region_102,region_1020,region_1021,region_1022,region_1025,region_1027,region_1028,region_1029,region_103,region_1030,region_1033,region_1034,region_1035,region_1036,region_1039,region_104,region_1045,region_1046,region_105,region_1050…	1700071K01Rik,4930447C04Rik,5730507C01Rik,AK011498,AW146020,AW146154,Abra,Acap2,Acer2,Aco1,Acsl4,Acvr1,Adam9,Adcy1,Adcy3,Adcy5,Adcyap1,Adnp,Adra2a,Adrb3,Aff1,Aff3,Agfg2,Ahctf1,Ahcyl1,Akap1,Akt2,Angpt1,Anxa3,Apbb2,Arfgap3,Arhgap10,Arhgap15,Arhgap18,Arhgap21,Arhgap24,Arhgap25,Arhgap26,Arhgap28,Arhgap29,Arhgap32,Arhgap42,Arhgap5,Arhgef19,Arid2,Arid4b,Arid5b,Arntl,Asap1,Asxl1,Atf6,Atf7ip,Atg10,Atg5,A…
GO Biological Process	GO:0048522	positive regulation of cellular process	11	1.95858e-22	1.68105e-18	1.52823e-19	1.3822	520.186	719	0.247708	0.342381	9	2.9171e-28	2.50375e-24	2.78194e-25	1.5537	333.397	518	2378	0.182716	0.21783	region_10,region_100,region_1000,region_1001,region_1002,region_1007,region_1008,region_1009,region_101,region_1010,region_1011,region_102,region_1020,region_1025,region_1028,region_1029,region_103,region_1030,region_1038,region_1039,region_104,region_1042,region_1043,region_1044,region_1045,region_1046,region_105,region_1050,region_1053,region_1058,region_1059,region_1065,region_107,region_1070,…	1700071K01Rik,A930038C07Rik,Aak1,Abl2,Abra,Accn1,Acer2,Actn4,Acvr1,Adam9,Adamts9,Adm,Adnp,Adra2a,Adrb3,Aen,Aff1,Ahctf1,Akt2,Aldh1a2,Aldh1a3,Aldh3a1,Angpt1,Angptl3,Anxa2,Anxa3,Ap3b1,Apbb2,Arg1,Arhgap5,Arntl,Asns,Atf7ip,Atg10,Atoh1,Atxn1,Axin2,B230120H23Rik,B4galt1,BC096441,Baiap2l1,Bambi,Bard1,Barx2,Bbs4,Bcl2,Bcl2l11,Bclaf1,Becn1,Bhlha15,Bhlhe23,Bmp3,Bmp7,Bmper,Bmpr2,Bnip3l,Boc,Bok,Brca1,Btg1,Cacy…
GO Biological Process	GO:0050789	regulation of biological process	12	4.95481e-22	4.25271e-18	3.54393e-19	1.17022	1247.63	1460	0.594108	0.695238	398	0.000140627	1	0.00303266	1.07373	1212.6	1302	8649	0.459259	0.150538	region_10,region_100,region_1000,region_1001,region_1002,region_1007,region_1008,region_1009,region_101,region_1010,region_1011,region_1012,region_1013,region_1014,region_1015,region_1016,region_1017,region_1018,region_1019,region_102,region_1020,region_1021,region_1022,region_1025,region_1026,region_1027,region_1028,region_1029,region_103,region_1030,region_1031,region_1033,region_1034,region_10…	1500015O10Rik,1700071K01Rik,2810407C02Rik,4930447C04Rik,4930474N05Rik,4930544G11Rik,5033414D02Rik,5430435G22Rik,5730507C01Rik,A830018L16Rik,A930038C07Rik,AK011498,AK053790,AW146020,AW146154,Aak1,Abcg8,Abl2,Abra,Acap2,Accn1,Acer2,Aco1,Acsl4,Actn4,Acvr1,Adam19,Adam9,Adamts9,Adcy1,Adcy3,Adcy5,Adcy8,Adcyap1,Adm,Adnp,Adra2a,Adrb3,Aen,Aff1,Aff3,Agfg2,Ahctf1,Ahcyl1,Akap1,Akap10,Akap11,Akap2,Akap7,Akt2,A…
GO Biological Process	GO:0043170	macromolecule metabolic process	13	6.7534e-22	5.79644e-18	4.4588e-19	1.25731	843.864	1061	0.40184	0.505238	174	1.19817e-08	0.000102839	5.91026e-07	1.16405	755.121	879	5386	0.310053	0.163201	region_0,region_1,region_1000,region_1001,region_1002,region_1007,region_1008,region_1009,region_1010,region_1011,region_1012,region_1013,region_1014,region_1015,region_1016,region_1018,region_1019,region_102,region_1020,region_1021,region_1025,region_103,region_1033,region_1034,region_1035,region_1036,region_1037,region_1039,region_104,region_1040,region_1042,region_1043,region_1044,region_1045,…	1110034B05Rik,1500015O10Rik,1700071K01Rik,2310035K24Rik,4833442J19Rik,6330577E15Rik,A930038C07Rik,AW146020,Aak1,Abl2,Abra,Acvr1,Adad2,Adam12,Adam19,Adam32,Adam9,Adamts16,Adamts18,Adamts9,Adat1,Adnp,Adra2a,Aff1,Aff3,Agl,Agtpbp1,Ahctf1,Ahcyl1,Akap7,Akt2,Alg6,Alkbh3,Anapc1,Anapc4,Angpt1,Anpep,Aoah,Arg1,Arhgef10l,Arid4b,Arid5b,Arih1,Arntl,Asxl1,Atf7ip,Atg10,Atg5,Atoh1,Atoh7,Auh,Axin2,B230120H23Rik,B3…
GO Biological Process	GO:0044260	cellular macromolecule metabolic process	14	1.15515e-21	9.91467e-18	7.08191e-19	1.27617	772.625	986	0.367917	0.469524	121	8.52702e-11	7.31874e-07	6.04854e-09	1.20392	671.141	808	4787	0.285009	0.168791	region_0,region_1,region_1007,region_1008,region_1009,region_1010,region_1011,region_1012,region_1013,region_1014,region_1015,region_1016,region_1018,region_1019,region_102,region_1020,region_1021,region_1025,region_103,region_1033,region_1034,region_1035,region_1036,region_1037,region_1039,region_104,region_1040,region_1042,region_1043,region_1044,region_1045,region_1046,region_1047,region_1048,…	1110034B05Rik,1500015O10Rik,1700071K01Rik,2310035K24Rik,4833442J19Rik,6330577E15Rik,A930038C07Rik,AW146020,Aak1,Abl2,Abra,Acvr1,Adad2,Adam9,Adat1,Adnp,Adra2a,Aff1,Aff3,Agl,Agtpbp1,Ahctf1,Ahcyl1,Akap7,Akt2,Alg6,Alkbh3,Anapc1,Anapc4,Aoah,Arhgef10l,Arid4b,Arid5b,Arih1,Arntl,Asxl1,Atf7ip,Atg10,Atg5,Atoh1,Atoh7,Auh,Axin2,B230120H23Rik,B3galt1,B3gnt2,B3gnt7,B4galt1,Bach2,Bard1,Barx2,Bbs10,Bbx,Bcl2,Bcla…
GO Biological Process	GO:0010468	regulation of gene expression	15	1.83173e-21	1.57217e-17	1.04811e-18	1.35681	552.766	750	0.263222	0.357143	60	9.51951e-16	8.1706e-12	1.36177e-13	1.34359	422.004	567	3010	0.2	0.188372	region_100,region_1007,region_1008,region_1009,region_1010,region_1011,region_1012,region_1013,region_1014,region_1015,region_1016,region_1018,region_102,region_1020,region_1025,region_1028,region_1029,region_103,region_1033,region_1034,region_1036,region_1039,region_104,region_1045,region_1046,region_1050,region_1053,region_1058,region_1059,region_1060,region_1065,region_107,region_1070,region_1…	1700071K01Rik,4930447C04Rik,5033414D02Rik,5730507C01Rik,AK011498,AW146020,AW146154,Aak1,Abra,Aco1,Acvr1,Adnp,Aff1,Aff3,Ahctf1,Ahcyl1,Akt2,Aldh1a2,Alkbh3,Anxa3,Apbb2,Arid2,Arid4b,Arid5b,Arntl,Asxl1,Atf6,Atf7ip,Atoh1,Atoh7,Atxn1,Axin2,Bach2,Bambi,Barx2,Bbx,Bcl2,Bclaf1,Bcor,Bhlha15,Bhlhe23,Bhlhe40,Bmp3,Bmp7,Bnip3l,Brca1,Brms1l,Brwd1,Brwd1,C1d,Calcr,Camk1d,Cand1,Caprin2,Carhsp1,Cartpt,Casz1,Ccnh,Ccnl…
GO Biological Process	GO:0050794	regulation of cellular process	16	2.00884e-21	1.72419e-17	1.07762e-18	1.17428	1210.96	1422	0.576646	0.677143	341	5.03286e-05	0.43197	0.00126677	1.08273	1148.94	1244	8195	0.438801	0.1518	region_10,region_100,region_1000,region_1001,region_1002,region_1007,region_1008,region_1009,region_101,region_1010,region_1011,region_1012,region_1013,region_1014,region_1015,region_1016,region_1017,region_1018,region_1019,region_102,region_1020,region_1021,region_1022,region_1025,region_1026,region_1027,region_1028,region_1029,region_103,region_1030,region_1031,region_1033,region_1034,region_10…	1500015O10Rik,1700071K01Rik,2810407C02Rik,4930447C04Rik,4930474N05Rik,4930544G11Rik,5430435G22Rik,5730507C01Rik,A830018L16Rik,A930038C07Rik,AK011498,AK053790,AW146020,AW146154,Aak1,Abl2,Abra,Acap2,Accn1,Acer2,Aco1,Acsl4,Actn4,Acvr1,Adam19,Adam9,Adamts9,Adcy1,Adcy3,Adcy5,Adcy8,Adcyap1,Adm,Adnp,Adra2a,Adrb3,Aen,Aff1,Aff3,Agfg2,Ahctf1,Ahcyl1,Akap1,Akap10,Akap11,Akap2,Akap7,Akt2,Aldh1a2,Aldh1a3,Aldh3…
GO Biological Process	GO:0019219	regulation of nucleobase-containing compound metabolic process	17	1.64671e-20	1.41337e-16	8.31393e-18	1.32715	600.534	797	0.285969	0.379524	27	6.47172e-20	5.55468e-16	2.05729e-17	1.38065	444.717	614	3172	0.216579	0.193569	region_100,region_1007,region_1008,region_1009,region_101,region_1010,region_1011,region_1012,region_1013,region_1014,region_1015,region_1016,region_1018,region_1020,region_1021,region_1022,region_1025,region_1027,region_1028,region_1029,region_103,region_1033,region_1034,region_1036,region_1039,region_104,region_1045,region_1046,region_1050,region_1053,region_1058,region_1059,region_1060,region_…	1700071K01Rik,4930447C04Rik,5730507C01Rik,AK011498,AW146020,AW146154,Abra,Acap2,Acvr1,Adcy1,Adcy3,Adcy5,Adcyap1,Adnp,Adra2a,Adrb3,Aff1,Aff3,Agfg2,Ahctf1,Ahcyl1,Akt2,Anxa3,Apbb2,Arfgap3,Arhgap10,Arhgap15,Arhgap18,Arhgap21,Arhgap24,Arhgap25,Arhgap26,Arhgap28,Arhgap29,Arhgap32,Arhgap42,Arhgap5,Arhgef19,Arid2,Arid4b,Arid5b,Arntl,Asap1,Asxl1,Atf6,Atf7ip,Atoh1,Atoh7,Atxn1,Axin2,BC096441,Bach2,Bambi,Bar…
GO Biological Process	GO:0051171	regulation of nitrogen compound metabolic process	18	4.95779e-20	4.25527e-16	2.36404e-17	1.3215	603.86	798	0.287552	0.38	32	3.09146e-19	2.6534e-15	8.29189e-17	1.37123	448.502	615	3199	0.216931	0.192248	region_100,region_1007,region_1008,region_1009,region_101,region_1010,region_1011,region_1012,region_1013,region_1014,region_1015,region_1016,region_1018,region_1020,region_1021,region_1022,region_1025,region_1027,region_1028,region_1029,region_103,region_1033,region_1034,region_1036,region_1039,region_104,region_1045,region_1046,region_1050,region_1053,region_1058,region_1059,region_1060,region_…	1700071K01Rik,4930447C04Rik,5730507C01Rik,AK011498,AW146020,AW146154,Abra,Acap2,Acvr1,Adcy1,Adcy3,Adcy5,Adcyap1,Adnp,Adra2a,Adrb3,Aff1,Aff3,Agfg2,Ahctf1,Ahcyl1,Akt2,Anxa3,Apbb2,Arfgap3,Arhgap10,Arhgap15,Arhgap18,Arhgap21,Arhgap24,Arhgap25,Arhgap26,Arhgap28,Arhgap29,Arhgap32,Arhgap42,Arhgap5,Arhgef19,Arid2,Arid4b,Arid5b,Arntl,Asap1,Asxl1,Atf6,Atf7ip,Atoh1,Atoh7,Atxn1,Axin2,BC096441,Bach2,Bambi,Bar…
GO Biological Process	GO:2000112	regulation of cellular macromolecule biosynthetic process	19	5.66267e-19	4.86027e-15	2.55804e-16	1.34294	530.179	712	0.252466	0.339048	79	4.08147e-14	3.50313e-10	4.43434e-12	1.33269	400.694	534	2858	0.18836	0.186844	region_10,region_100,region_1007,region_1008,region_1009,region_1010,region_1011,region_1012,region_1013,region_1014,region_1015,region_1016,region_1018,region_102,region_1020,region_1025,region_1028,region_1029,region_103,region_1033,region_1034,region_1036,region_1039,region_104,region_1045,region_1046,region_1050,region_1053,region_1058,region_1059,region_1060,region_1065,region_107,region_107…	1700071K01Rik,4930447C04Rik,5730507C01Rik,AK011498,AW146020,AW146154,Abra,Acer2,Aco1,Acvr1,Adnp,Aff1,Aff3,Ahctf1,Akt2,Anxa3,Apbb2,Arid2,Arid4b,Arid5b,Arntl,Asxl1,Atf6,Atf7ip,Atoh1,Atoh7,Atxn1,Axin2,Bach2,Bambi,Barx2,Bbx,Bcl2,Bclaf1,Bcor,Bhlha15,Bhlhe23,Bhlhe40,Bmp3,Bmp7,Brca1,Brms1l,Brwd1,Brwd1,C1d,Cacybp,Camk1d,Cand1,Caprin2,Carhsp1,Casz1,Ccdc88a,Ccnh,Ccnl1,Ccnt2,Cd28,Cdca7l,Cdk13,Cdyl,Cggbp1,Ch…
GO Biological Process	GO:0010556	regulation of macromolecule biosynthetic process	20	7.69394e-19	6.60371e-15	3.30185e-16	1.33918	535.402	717	0.254953	0.341429	82	7.04852e-14	6.04975e-10	7.37774e-12	1.32529	408.966	542	2917	0.191182	0.185807	region_10,region_100,region_1007,region_1008,region_1009,region_1010,region_1011,region_1012,region_1013,region_1014,region_1015,region_1016,region_1018,region_102,region_1020,region_1025,region_1028,region_1029,region_103,region_1033,region_1034,region_1036,region_1039,region_104,region_1045,region_1046,region_1050,region_1053,region_1058,region_1059,region_1060,region_1065,region_107,region_107…	1700071K01Rik,4930447C04Rik,5730507C01Rik,AK011498,AW146020,AW146154,Abra,Acer2,Aco1,Acvr1,Adnp,Aff1,Aff3,Ahctf1,Akt2,Anxa3,Apbb2,Arid2,Arid4b,Arid5b,Arntl,Asxl1,Atf6,Atf7ip,Atoh1,Atoh7,Atxn1,Axin2,Bach2,Bambi,Barx2,Bbx,Bcl2,Bclaf1,Bcor,Bhlha15,Bhlhe23,Bhlhe40,Bmp3,Bmp7,Brca1,Brms1l,Brwd1,Brwd1,C1d,Cacybp,Camk1d,Cand1,Caprin2,Carhsp1,Casz1,Ccdc88a,Ccl2,Ccnh,Ccnl1,Ccnt2,Cd276,Cd28,Cdca7l,Cdk13,Cdy…
GO Biological Process	GO:0034641	cellular nitrogen compound metabolic process	21	3.03916e-18	2.60851e-14	1.24215e-15	1.3046	604.784	789	0.287992	0.375714	217	1.52776e-07	0.00131128	6.04276e-06	1.19262	519.865	620	3708	0.218695	0.167206	region_10,region_100,region_1007,region_1008,region_1009,region_1010,region_1011,region_1012,region_1013,region_1014,region_1015,region_1016,region_1018,region_1020,region_1021,region_1025,region_1026,region_103,region_1033,region_1034,region_1036,region_1037,region_1039,region_104,region_1040,region_1041,region_1045,region_1046,region_1053,region_1058,region_1059,region_1060,region_107,region_10…	1110034B05Rik,2310035K24Rik,6330577E15Rik,AW146020,Aadat,Abca13,Abca4,Abcb5,Abcc2,Abcc4,Abcg8,Abra,Accsl,Acer2,Adad2,Adat1,Adc,Adcy1,Adcy3,Adcy5,Adcy8,Adnp,Adsl,Aff1,Aff3,Ahctf1,Ahcyl1,Akap7,Aldh1l1,Aldh5a1,Alkbh3,Ampd3,Arg1,Arid4b,Arid5b,Arl4a,Arntl,Asns,Ass1,Asxl1,Atf7ip,Atic,Atl1,Atl2,Atoh1,Atoh7,Atp12a,Atp1b3,Atp5g3,Auh,Axin2,Bach2,Bard1,Barx2,Bbx,Bcat1,Bckdhb,Bclaf1,Bcor,Bhlha15,Bhlhe23,Bhlh…
GO Biological Process	GO:0009058	biosynthetic process	22	4.08156e-18	3.50321e-14	1.59237e-15	1.32766	544.567	723	0.259318	0.344286	115	4.93967e-11	4.23971e-07	3.68671e-09	1.27229	437.006	556	3117	0.19612	0.178377	region_10,region_1007,region_1008,region_1009,region_1010,region_1011,region_1012,region_1013,region_1014,region_1015,region_1016,region_1018,region_1020,region_1025,region_1033,region_1034,region_1036,region_1039,region_1040,region_1042,region_1043,region_1044,region_1045,region_1046,region_1047,region_1048,region_1049,region_1053,region_1058,region_1059,region_1060,region_107,region_1070,region…	2310030N02Rik,A4galt,AW146020,Aadat,Abra,Accsl,Acer2,Adc,Adcy1,Adcy3,Adcy5,Adcy8,Adnp,Adsl,Aff1,Aff3,Agl,Agpat3,Agpat4,Ahctf1,Akr1d1,Akt2,Aldh1a2,Aldh1a3,Aldh1l1,Aldh8a1,Alg6,Ampd3,Angpt1,Arg1,Arid4b,Arid5b,Arntl,Asns,Ass1,Asxl1,Atf7ip,Atg10,Atic,Atoh1,Atoh7,Atp12a,Atp1b3,Atp5g3,B3galt1,B3gnt2,B3gnt7,B4galt1,Bach2,Barx2,Bbx,Bcat1,Bclaf1,Bcor,Bhlha15,Bhlhe23,Bhlhe40,Bmpr2,Brca1,Brms1l,Brwd1,C1d,Ca…
GO Biological Process	GO:0007275	multicellular organismal development	23	1.04468e-17	8.96652e-14	3.89849e-15	1.26164	719.696	908	0.342712	0.432381	2	7.64012e-36	6.55751e-32	3.27876e-32	1.52603	448.222	684	3197	0.24127	0.213951	region_10,region_100,region_1007,region_1008,region_1009,region_101,region_1010,region_1011,region_1012,region_1013,region_1014,region_1015,region_1017,region_1018,region_102,region_1025,region_1027,region_1028,region_103,region_1030,region_1038,region_104,region_1045,region_1046,region_1050,region_1052,region_1053,region_1058,region_1059,region_1069,region_107,region_1070,region_1071,region_1072…	2510003E04Rik,4930447C04Rik,5830411N06Rik,A930038C07Rik,AK053790,Aard,Abi2,Abl2,Aco1,Acsl4,Actg1,Acvr1,Adam19,Adam9,Adcy1,Adm,Adnp,Aff3,Agtpbp1,Ahctf1,Akt2,Aldh1a2,Aldh1a3,Aldh5a1,Angpt1,Angptl3,Ank3,Ano1,Anpep,Anxa2,Anxa3,Apba2,Apbb2,Aqp11,Aqp3,Arfrp1,Arg1,Arhgap24,Arid5b,Asah1,Asns,Ass1,Atg5,Atic,Atl1,Atoh1,Atoh7,Axin2,B3gnt2,B4galt1,BC096441,Bai2,Barx2,Bbs4,Bcl2,Bcl2l11,Bcor,Bdh1,Bfsp1,Bfsp2,B…
GO Biological Process	GO:0032502	developmental process	24	1.63143e-17	1.40026e-13	5.8344e-15	1.24736	764.817	954	0.364198	0.454286	1	2.33801e-36	2.00671e-32	2.00671e-32	1.49925	492.245	738	3511	0.260317	0.210197	region_10,region_100,region_1007,region_1008,region_1009,region_101,region_1010,region_1011,region_1012,region_1013,region_1014,region_1015,region_1017,region_1018,region_102,region_1023,region_1025,region_1027,region_1028,region_1029,region_103,region_1030,region_1033,region_1034,region_1038,region_104,region_1045,region_1046,region_1050,region_1052,region_1053,region_1058,region_1059,region_106…	1500015O10Rik,2510003E04Rik,4930447C04Rik,5830411N06Rik,A930038C07Rik,AK053790,Aard,Abi2,Abl2,Aco1,Acsl4,Actg1,Acvr1,Adam19,Adam9,Adcy1,Adm,Adnp,Adrb3,Aff3,Agtpbp1,Ahctf1,Ahi1,Akt2,Aldh1a2,Aldh1a3,Aldh3a1,Aldh5a1,Angpt1,Angptl3,Ank3,Ano1,Anpep,Anxa2,Anxa3,Apba2,Apbb2,Aqp11,Aqp3,Arfrp1,Arg1,Arhgap24,Arid5b,Arl4a,Asah1,Asap1,Asns,Ass1,Atg5,Atic,Atl1,Atoh1,Atoh7,Atp5g3,Axin2,B3gnt2,B4galt1,BC096441,…
GO Biological Process	GO:0044249	cellular biosynthetic process	25	2.81016e-17	2.41196e-13	9.64785e-15	1.3257	528.779	701	0.2518	0.333809	131	4.46972e-10	3.83636e-06	2.92852e-08	1.26287	422.846	534	3016	0.18836	0.177056	region_10,region_1007,region_1008,region_1009,region_1010,region_1011,region_1012,region_1013,region_1014,region_1015,region_1016,region_1018,region_1020,region_1025,region_1033,region_1034,region_1036,region_1039,region_1040,region_1042,region_1043,region_1044,region_1045,region_1046,region_1047,region_1048,region_1049,region_1053,region_1058,region_1059,region_1060,region_107,region_1070,region…	AW146020,Abra,Accsl,Acer2,Adc,Adcy1,Adcy3,Adcy5,Adcy8,Adnp,Adsl,Aff1,Aff3,Agl,Agpat3,Agpat4,Ahctf1,Akr1d1,Akt2,Aldh1a2,Aldh1a3,Aldh8a1,Alg6,Ampd3,Angpt1,Arg1,Arid4b,Arid5b,Arntl,Asns,Ass1,Asxl1,Atf7ip,Atg10,Atic,Atoh1,Atoh7,Atp12a,Atp1b3,Atp5g3,B3galt1,B3gnt2,B3gnt7,B4galt1,Bach2,Barx2,Bbx,Bcat1,Bclaf1,Bcor,Bhlha15,Bhlhe23,Bhlhe40,Bmpr2,Brca1,Brms1l,Brwd1,C1d,Cand1,Car5a,Casz1,Ccdc88a,Ccnh,Ccnl1,…
GO Biological Process	GO:0006807	nitrogen compound metabolic process	26	2.89074e-17	2.48112e-13	9.54277e-15	1.28962	620.34	800	0.2954	0.380952	202	7.30803e-08	0.000627248	3.10519e-06	1.19471	533.184	637	3803	0.224691	0.167499	region_10,region_100,region_1007,region_1008,region_1009,region_1010,region_1011,region_1012,region_1013,region_1014,region_1015,region_1016,region_1018,region_1020,region_1021,region_1025,region_1026,region_103,region_1033,region_1034,region_1036,region_1037,region_1039,region_104,region_1040,region_1041,region_1045,region_1046,region_1053,region_1058,region_1059,region_1060,region_107,region_10…	1110034B05Rik,2310035K24Rik,6330577E15Rik,A930038C07Rik,AW146020,Aadat,Abca13,Abca4,Abcb5,Abcc2,Abcc4,Abcg8,Abra,Accsl,Acer2,Adad2,Adat1,Adc,Adcy1,Adcy3,Adcy5,Adcy8,Adnp,Adsl,Aff1,Aff3,Ahctf1,Ahcyl1,Akap7,Aldh1l1,Aldh5a1,Alkbh3,Ampd3,Angpt1,Arg1,Arid4b,Arid5b,Arl4a,Arntl,Asns,Ass1,Asxl1,Atf7ip,Atic,Atl1,Atl2,Atoh1,Atoh7,Atp12a,Atp1b3,Atp5g3,Auh,Axin2,Bach2,Bard1,Barx2,Bbx,Bcat1,Bckdhb,Bclaf1,Bcor…
GO Biological Process	GO:0031326	regulation of cellular biosynthetic process	27	3.58764e-17	3.07927e-13	1.14047e-14	1.30936	565.163	740	0.269125	0.352381	66	5.70235e-15	4.89433e-11	7.41565e-13	1.33136	426.631	568	3043	0.200353	0.186658	region_10,region_100,region_1007,region_1008,region_1009,region_1010,region_1011,region_1012,region_1013,region_1014,region_1015,region_1016,region_1018,region_102,region_1020,region_1025,region_1028,region_1029,region_103,region_1033,region_1034,region_1036,region_1039,region_104,region_1045,region_1046,region_1050,region_1053,region_1058,region_1059,region_1060,region_1065,region_107,region_107…	1700071K01Rik,4930447C04Rik,5730507C01Rik,AK011498,AW146020,AW146154,Abra,Acer2,Aco1,Acvr1,Adcy1,Adcy3,Adcy5,Adcyap1,Adnp,Adra2a,Adrb3,Aff1,Aff3,Ahctf1,Akt2,Anxa3,Apbb2,Arid2,Arid4b,Arid5b,Arntl,Asxl1,Atf6,Atf7ip,Atoh1,Atoh7,Atxn1,Axin2,Bach2,Bambi,Barx2,Bbx,Bcl2,Bclaf1,Bcor,Bhlha15,Bhlhe23,Bhlhe40,Bmp3,Bmp7,Brca1,Brms1l,Brwd1,Brwd1,C1d,Cacna1a,Cacybp,Calcr,Camk1d,Cand1,Caprin2,Carhsp1,Casz1,Ccdc…
GO Biological Process	GO:0051252	regulation of RNA metabolic process	28	4.56399e-17	3.91728e-13	1.39903e-14	1.33064	512.534	682	0.244064	0.324762	76	2.77864e-14	2.38491e-10	3.13804e-12	1.34523	381.346	513	2720	0.180952	0.188603	region_100,region_1007,region_1008,region_1009,region_1010,region_1011,region_1012,region_1013,region_1014,region_1015,region_1016,region_1018,region_1020,region_1025,region_1028,region_1029,region_103,region_1033,region_1034,region_1036,region_1039,region_104,region_1045,region_1046,region_1050,region_1053,region_1058,region_1059,region_1060,region_1065,region_107,region_1070,region_1071,region_…	1700071K01Rik,4930447C04Rik,5730507C01Rik,AK011498,AW146020,AW146154,Abra,Acvr1,Adnp,Aff1,Aff3,Ahctf1,Ahcyl1,Akt2,Anxa3,Apbb2,Arid2,Arid4b,Arid5b,Arntl,Asxl1,Atf6,Atf7ip,Atoh1,Atoh7,Atxn1,Axin2,Bach2,Bambi,Barx2,Bbx,Bclaf1,Bcor,Bhlha15,Bhlhe23,Bhlhe40,Bmp3,Bmp7,Brca1,Brms1l,Brwd1,Brwd1,C1d,Calcr,Camk1d,Cand1,Caprin2,Carhsp1,Casz1,Ccnh,Ccnl1,Ccnt2,Cd28,Cdca7l,Cdk13,Cdyl,Celf4,Cggbp1,Chaf1b,Chd1,Ch…
GO Biological Process	GO:0016070	RNA metabolic process	29	4.64516e-17	3.98694e-13	1.37481e-14	1.37637	424.305	584	0.20205	0.278095	163	6.99691e-09	6.00544e-05	3.68432e-07	1.28375	326.387	419	2328	0.147795	0.179983	region_1007,region_1008,region_1009,region_1010,region_1011,region_1012,region_1013,region_1014,region_1015,region_1016,region_1018,region_1020,region_1025,region_103,region_1033,region_1034,region_1036,region_1037,region_1039,region_104,region_1045,region_1046,region_1053,region_1058,region_1059,region_1060,region_107,region_1070,region_1071,region_1072,region_1073,region_108,region_1081,region_…	1110034B05Rik,AW146020,Abra,Adad2,Adat1,Adnp,Aff1,Aff3,Ahctf1,Ahcyl1,Akap7,Arid4b,Arid5b,Arntl,Asxl1,Atf7ip,Atoh1,Atoh7,Auh,Axin2,Bach2,Barx2,Bbx,Bclaf1,Bcor,Bhlha15,Bhlhe23,Bhlhe40,Bmpr2,Brms1l,Brwd1,C1d,Calcr,Cand1,Carhsp1,Casz1,Ccnh,Ccnl1,Cdca7l,Cdk13,Cdkal1,Cdyl,Celf4,Cggbp1,Chaf1b,Chd1,Chd7,Chd9,Cited2,Clock,Cnot2,Cnot6,Creb1,Creb3l2,Crebl2,Csrnp1,Cstf2t,Ctbp2,Ctnnb1,Ctnnd2,Cux1,Dars,Dcp2,Dd…
GO Biological Process	GO:0090304	nucleic acid metabolic process	30	5.05597e-17	4.33954e-13	1.44651e-14	1.34603	479.188	645	0.228185	0.307143	231	3.87735e-07	0.00332793	1.44066e-05	1.21999	395.086	482	2818	0.170018	0.171043	region_1007,region_1008,region_1009,region_1010,region_1011,region_1012,region_1013,region_1014,region_1015,region_1016,region_1018,region_1020,region_1021,region_1025,region_103,region_1033,region_1034,region_1036,region_1037,region_1039,region_104,region_1045,region_1046,region_1053,region_1058,region_1059,region_1060,region_107,region_1070,region_1071,region_1072,region_1073,region_108,region_…	1110034B05Rik,2310035K24Rik,6330577E15Rik,AW146020,Abra,Adad2,Adat1,Adnp,Aff1,Aff3,Ahctf1,Ahcyl1,Akap7,Alkbh3,Arid4b,Arid5b,Arntl,Asxl1,Atf7ip,Atoh1,Atoh7,Auh,Axin2,Bach2,Bard1,Barx2,Bbx,Bclaf1,Bcor,Bhlha15,Bhlhe23,Bhlhe40,Bmpr2,Brca1,Brms1l,Brwd1,C1d,C330006K01Rik,Calcr,Cand1,Carhsp1,Casz1,Ccdc88a,Ccnh,Ccnl1,Cdca7l,Cdk13,Cdkal1,Cdyl,Celf4,Cep164,Cggbp1,Chaf1b,Chd1,Chd1l,Chd7,Chd9,Cited2,Clock,Cn…
GO Biological Process	GO:0006355	regulation of transcription, DNA-dependent	31	6.79416e-17	5.83143e-13	1.88111e-14	1.33331	502.509	670	0.23929	0.319048	75	2.5448e-14	2.1842e-10	2.91227e-12	1.35079	372.373	503	2656	0.177425	0.189383	region_100,region_1007,region_1008,region_1009,region_1010,region_1011,region_1012,region_1013,region_1014,region_1015,region_1016,region_1018,region_1020,region_1025,region_1028,region_1029,region_103,region_1033,region_1034,region_1036,region_1039,region_104,region_1045,region_1046,region_1050,region_1053,region_1058,region_1059,region_1060,region_1065,region_107,region_1070,region_1071,region_…	1700071K01Rik,4930447C04Rik,5730507C01Rik,AK011498,AW146020,AW146154,Abra,Acvr1,Adnp,Aff1,Aff3,Ahctf1,Akt2,Anxa3,Apbb2,Arid2,Arid4b,Arid5b,Arntl,Asxl1,Atf6,Atf7ip,Atoh1,Atoh7,Atxn1,Axin2,Bach2,Bambi,Barx2,Bbx,Bclaf1,Bcor,Bhlha15,Bhlhe23,Bhlhe40,Bmp3,Bmp7,Brca1,Brms1l,Brwd1,Brwd1,C1d,Camk1d,Cand1,Caprin2,Carhsp1,Casz1,Ccnh,Ccnl1,Ccnt2,Cd28,Cdca7l,Cdk13,Cdyl,Cggbp1,Chaf1b,Chd1,Chd7,Chd9,Cited2,Cloc…
GO Biological Process	GO:0009889	regulation of biosynthetic process	32	6.91573e-17	5.93577e-13	1.85493e-14	1.30471	569.475	743	0.271178	0.353809	65	5.58102e-15	4.79018e-11	7.36952e-13	1.32981	430.136	572	3068	0.201764	0.186441	region_10,region_100,region_1007,region_1008,region_1009,region_1010,region_1011,region_1012,region_1013,region_1014,region_1015,region_1016,region_1018,region_102,region_1020,region_1025,region_1028,region_1029,region_103,region_1033,region_1034,region_1036,region_1039,region_104,region_1045,region_1046,region_1050,region_1053,region_1058,region_1059,region_1060,region_1065,region_107,region_107…	1700071K01Rik,4930447C04Rik,5730507C01Rik,AK011498,AW146020,AW146154,Abra,Acer2,Aco1,Acvr1,Adcy1,Adcy3,Adcy5,Adcyap1,Adnp,Adra2a,Adrb3,Aff1,Aff3,Ahctf1,Akt2,Anxa3,Apbb2,Arid2,Arid4b,Arid5b,Arntl,Asxl1,Atf6,Atf7ip,Atoh1,Atoh7,Atxn1,Axin2,Bach2,Bambi,Barx2,Bbx,Bcl2,Bclaf1,Bcor,Bhlha15,Bhlhe23,Bhlhe40,Bmp3,Bmp7,Brca1,Brms1l,Brwd1,Brwd1,C1d,Cacna1a,Cacybp,Calcr,Camk1d,Cand1,Caprin2,Carhsp1,Casz1,Ccdc…
GO Biological Process	GO:0006139	nucleobase-containing compound metabolic process	33	1.05993e-16	9.09739e-13	2.75678e-14	1.30822	555.719	727	0.264628	0.346191	245	1.17783e-06	0.0101093	4.12626e-05	1.18772	474.86	564	3387	0.198942	0.166519	region_100,region_1007,region_1008,region_1009,region_1010,region_1011,region_1012,region_1013,region_1014,region_1015,region_1016,region_1018,region_1020,region_1021,region_1025,region_1026,region_103,region_1033,region_1034,region_1036,region_1037,region_1039,region_104,region_1040,region_1041,region_1045,region_1046,region_1053,region_1058,region_1059,region_1060,region_107,region_1070,region_…	1110034B05Rik,2310035K24Rik,6330577E15Rik,AW146020,Abca13,Abca4,Abcb5,Abcc2,Abcc4,Abcg8,Abra,Adad2,Adat1,Adcy1,Adcy3,Adcy5,Adcy8,Adnp,Adsl,Aff1,Aff3,Ahctf1,Ahcyl1,Akap7,Alkbh3,Ampd3,Arid4b,Arid5b,Arl4a,Arntl,Asxl1,Atf7ip,Atic,Atl1,Atl2,Atoh1,Atoh7,Atp12a,Atp1b3,Atp5g3,Auh,Axin2,Bach2,Bard1,Barx2,Bbx,Bclaf1,Bcor,Bhlha15,Bhlhe23,Bhlhe40,Bmpr2,Brca1,Brms1l,Brwd1,C1d,C330006K01Rik,Calcr,Cand1,Carhsp1…
GO Biological Process	GO:0032774	RNA biosynthetic process	34	2.07409e-15	1.78019e-11	5.23586e-13	1.40099	351.894	493	0.167568	0.234762	99	1.987e-12	1.70544e-08	1.72267e-10	1.41342	244.09	345	1741	0.121693	0.198162	region_1007,region_1008,region_1009,region_1010,region_1011,region_1012,region_1013,region_1014,region_1015,region_1016,region_1018,region_1020,region_1025,region_1033,region_1034,region_1036,region_1039,region_1045,region_1046,region_1053,region_1058,region_1059,region_1060,region_107,region_1070,region_1071,region_1072,region_1073,region_108,region_1081,region_1082,region_1083,region_1089,regio…	AW146020,Abra,Adnp,Aff1,Aff3,Ahctf1,Arid4b,Arid5b,Arntl,Asxl1,Atf7ip,Atoh1,Atoh7,Bach2,Barx2,Bbx,Bclaf1,Bcor,Bhlha15,Bhlhe23,Bhlhe40,Bmpr2,Brms1l,Brwd1,C1d,Cand1,Casz1,Ccnh,Ccnl1,Cdca7l,Cdyl,Cggbp1,Chaf1b,Chd1,Chd7,Chd9,Cited2,Clock,Cnot2,Cnot6,Creb1,Creb3l2,Crebl2,Csrnp1,Ctbp2,Ctnnb1,Ctnnd2,Cux1,Ddx1,Dmbx1,Dmrt1,Dnttip2,E2f3,E2f8,Ebf1,Eed,Egr2,Ehf,Eif2c2,Elf5,Elk3,Ell2,Elp2,Elp4,Eomes,Epas1,Epc2…
GO Biological Process	GO:0048869	cellular developmental process	35	3.73123e-15	3.20252e-11	9.15005e-13	1.30589	519.188	678	0.247232	0.322857	7	6.65293e-33	5.71021e-29	8.15744e-30	1.63938	302.553	496	2158	0.174956	0.229842	region_100,region_1007,region_1008,region_1009,region_101,region_1010,region_1011,region_1012,region_1013,region_1014,region_1015,region_1017,region_102,region_1025,region_1027,region_1028,region_1029,region_103,region_1030,region_1033,region_1034,region_104,region_1045,region_1046,region_1050,region_1052,region_1053,region_107,region_1070,region_1071,region_1072,region_1073,region_1074,region_10…	2510003E04Rik,5830411N06Rik,A930038C07Rik,Abi2,Abl2,Acsl4,Actg1,Acvr1,Adam9,Adcy1,Adm,Adnp,Agtpbp1,Ahi1,Aldh1a2,Angpt1,Ank3,Anpep,Apbb2,Arhgap24,Arid5b,Arl4a,Asap1,Atg5,Atl1,Atoh1,Atoh7,Axin2,B3gnt2,B4galt1,BC096441,Barx2,Bbs10,Bbs4,Bbs9,Bcl2,Bfsp1,Bfsp2,Bhlha15,Bmp3,Bmp7,Boc,Bok,Bpgm,Brca1,C1galt1,Cabyr,Cacna1a,Cacybp,Cadm1,Calcr,Camk1d,Cand1,Cap2,Caprin2,Ccdc88a,Cckar,Ccl2,Ccnd2,Cd28,Cd9,Cdc25b…
GO Biological Process	GO:0030154	cell differentiation	36	3.82179e-15	3.28024e-11	9.11178e-13	1.31116	506.421	664	0.241153	0.31619	6	5.00286e-33	4.29396e-29	7.1566e-30	1.65469	291.898	483	2082	0.17037	0.231988	region_100,region_1007,region_1008,region_1009,region_1010,region_1011,region_1012,region_1013,region_1014,region_1015,region_1017,region_102,region_1025,region_1027,region_1028,region_1029,region_103,region_1030,region_1033,region_1034,region_104,region_1045,region_1046,region_1050,region_1052,region_1053,region_107,region_1070,region_1071,region_1072,region_1073,region_1074,region_108,region_10…	2510003E04Rik,5830411N06Rik,A930038C07Rik,Abi2,Abl2,Acsl4,Actg1,Acvr1,Adam9,Adcy1,Adm,Adnp,Agtpbp1,Aldh1a2,Angpt1,Ank3,Anpep,Apbb2,Arhgap24,Arid5b,Arl4a,Atg5,Atl1,Atoh1,Atoh7,Axin2,B3gnt2,B4galt1,BC096441,Barx2,Bbs4,Bbs9,Bcl2,Bfsp1,Bfsp2,Bhlha15,Bmp3,Bmp7,Boc,Bok,Bpgm,Brca1,C1galt1,Cabyr,Cacna1a,Cacybp,Cadm1,Calcr,Camk1d,Cand1,Caprin2,Ccdc88a,Cckar,Ccl2,Ccnd2,Cd28,Cd9,Cdc25b,Cdh2,Cdh23,Cdh4,Cdk6,…
GO Biological Process	GO:0006351	transcription, DNA-dependent	37	6.23444e-15	5.35102e-11	1.44622e-12	1.39386	351.542	490	0.167401	0.233333	102	4.01237e-12	3.44382e-08	3.37629e-10	1.40765	243.669	343	1738	0.120988	0.197353	region_1007,region_1008,region_1009,region_1010,region_1011,region_1012,region_1013,region_1014,region_1015,region_1016,region_1018,region_1020,region_1025,region_1033,region_1034,region_1036,region_1039,region_1045,region_1046,region_1053,region_1058,region_1059,region_1060,region_107,region_1070,region_1071,region_1072,region_1073,region_108,region_1081,region_1082,region_1083,region_1089,regio…	AW146020,Abra,Adnp,Aff1,Aff3,Ahctf1,Arid4b,Arid5b,Arntl,Asxl1,Atf7ip,Atoh1,Atoh7,Bach2,Barx2,Bbx,Bclaf1,Bcor,Bhlha15,Bhlhe23,Bhlhe40,Bmpr2,Brms1l,Brwd1,C1d,Cand1,Casz1,Ccnh,Ccnl1,Cdca7l,Cdyl,Cggbp1,Chaf1b,Chd1,Chd7,Chd9,Cited2,Clock,Cnot2,Cnot6,Creb1,Creb3l2,Crebl2,Csrnp1,Ctbp2,Ctnnb1,Ctnnd2,Cux1,Ddx1,Dmbx1,Dmrt1,Dnttip2,E2f3,E2f8,Ebf1,Eed,Egr2,Ehf,Eif2c2,Elf5,Elk3,Ell2,Elp2,Elp4,Eomes,Epas1,Epc2…
GO Biological Process	GO:0048856	anatomical structure development	38	8.27883e-15	7.10572e-11	1.86993e-12	1.24745	678.986	847	0.323327	0.403333	3	3.19498e-35	2.74225e-31	9.14082e-32	1.54556	416.677	644	2972	0.22716	0.216689	region_100,region_1007,region_1008,region_1009,region_101,region_1010,region_1011,region_1012,region_1013,region_1014,region_1015,region_1017,region_102,region_1023,region_1025,region_1027,region_1028,region_103,region_1030,region_1038,region_104,region_1045,region_1046,region_1050,region_1052,region_1053,region_1058,region_1059,region_1069,region_107,region_1070,region_1071,region_1072,region_10…	2510003E04Rik,5830411N06Rik,A930038C07Rik,AK053790,Aard,Abi2,Abl2,Acsl4,Actg1,Acvr1,Adam19,Adam9,Adcy1,Adm,Adnp,Aff3,Agtpbp1,Ahctf1,Ahi1,Aldh1a2,Aldh1a3,Aldh5a1,Angpt1,Angptl3,Ank3,Ano1,Anpep,Anxa2,Anxa3,Apbb2,Aqp11,Aqp3,Arfrp1,Arg1,Arhgap24,Arid5b,Asah1,Asap1,Asns,Ass1,Atg5,Atic,Atl1,Atoh1,Atoh7,Axin2,B3gnt2,B4galt1,BC096441,Bai2,Barx2,Bbs10,Bbs4,Bcl2,Bcl2l11,Bcor,Bdh1,Bfsp1,Bfsp2,Bhlha15,Bhlhe2…
GO Biological Process	GO:0050896	response to stimulus	39	9.17861e-15	7.878e-11	2.02e-12	1.18405	955.2	1131	0.454857	0.538571	1454	0.0469549	1	0.277176	1.04331	902.893	942	6440	0.332275	0.146273	region_10,region_100,region_1007,region_1008,region_1009,region_101,region_1010,region_1011,region_1012,region_1013,region_1014,region_1015,region_1017,region_1018,region_1019,region_102,region_1020,region_1021,region_1022,region_1023,region_1025,region_1026,region_1027,region_1028,region_1029,region_103,region_1030,region_1031,region_1037,region_1038,region_104,region_1040,region_1042,region_104…	1500015O10Rik,1700071K01Rik,2310035K24Rik,4930544G11Rik,5430435G22Rik,6330577E15Rik,A830018L16Rik,AK053790,Abca4,Abcc4,Abi2,Abl2,Accn1,Acer2,Aco1,Acsl4,Actg1,Actn4,Acvr1,Adam19,Adam9,Adcy1,Adcy3,Adcy5,Adcy8,Adcyap1,Add3,Adm,Adnp,Adra2a,Adrb3,Adsl,Aen,Agl,Aim2,Akap1,Akap10,Akap2,Akt2,Aldh1a2,Aldh1a3,Aldh3a1,Alkbh3,Angpt1,Angptl2,Angptl3,Ank2,Ank3,Anxa2,Anxa3,Ap3b1,Apba2,Apbb2,Aqp3,Arf1,Arfrp1,Arg1…
GO Biological Process	GO:0009059	macromolecule biosynthetic process	40	1.17978e-14	1.01261e-10	2.53152e-12	1.33657	439.184	587	0.209135	0.279524	156	2.74199e-09	2.35345e-05	1.50862e-07	1.28709	335.641	432	2394	0.152381	0.180451	region_1007,region_1008,region_1009,region_1010,region_1011,region_1012,region_1013,region_1014,region_1015,region_1016,region_1018,region_1020,region_1025,region_1033,region_1034,region_1036,region_1039,region_1042,region_1043,region_1044,region_1045,region_1046,region_1047,region_1048,region_1049,region_1053,region_1058,region_1059,region_1060,region_107,region_1070,region_1071,region_1072,regi…	AW146020,Abra,Adnp,Aff1,Aff3,Agl,Ahctf1,Akt2,Alg6,Angpt1,Arg1,Arid4b,Arid5b,Arntl,Asxl1,Atf7ip,Atg10,Atoh1,Atoh7,B3galt1,B3gnt2,B3gnt7,B4galt1,Bach2,Barx2,Bbx,Bclaf1,Bcor,Bhlha15,Bhlhe23,Bhlhe40,Bmpr2,Brca1,Brms1l,Brwd1,C1d,Cand1,Casz1,Ccdc88a,Ccnh,Ccnl1,Cdca7l,Cdyl,Cggbp1,Chaf1b,Chd1,Chd7,Chd9,Chst8,Cited2,Clip3,Clock,Cnot2,Cnot6,Col3a1,Creb1,Creb3l2,Crebl2,Csrnp1,Ctbp2,Ctgf,Ctnnb1,Ctnnd2,Cux1,D…
GO Biological Process	GO:0010604	positive regulation of macromolecule metabolic process	41	1.28653e-14	1.10423e-10	2.69323e-12	1.42171	309.487	440	0.147375	0.209524	23	1.44454e-21	1.23985e-17	5.39064e-19	1.67633	182.541	306	1302	0.107937	0.235023	region_100,region_1007,region_1008,region_1009,region_1010,region_1011,region_102,region_1025,region_1028,region_1029,region_103,region_1030,region_1039,region_104,region_1045,region_1046,region_1050,region_1053,region_1058,region_1059,region_1065,region_107,region_1070,region_1071,region_1072,region_1073,region_1076,region_1077,region_108,region_109,region_1090,region_1093,region_110,region_1101…	1700071K01Rik,Abra,Acvr1,Adam9,Adnp,Adra2a,Aff1,Ahctf1,Akt2,Aldh1a2,Angpt1,Anxa3,Arntl,Atf7ip,Atg10,Atoh1,Atxn1,Axin2,BC096441,Bambi,Barx2,Bhlha15,Bhlhe23,Bmp3,Bmp7,Bmpr2,Brca1,Cacybp,Cand1,Caprin2,Ccl2,Ccnd2,Ccnh,Cd276,Cd28,Cd80,Cdh13,Celf4,Cited2,Clip3,Clock,Cntf,Cops5,Creb1,Creb3l2,Cryaa,Csf1,Csrnp1,Ctgf,Ctnnb1,Cul4b,Cyp26b1,Dab2,Ddx58,Dlx2,Dyrk2,E2f3,Ebf1,Ednra,Egr2,Ehf,En2,Eomes,Epas1,Esrrb,…
GO Biological Process	GO:0034645	cellular macromolecule biosynthetic process	42	1.35595e-14	1.16381e-10	2.77098e-12	1.33792	435.004	582	0.207145	0.277143	164	7.0956e-09	6.09016e-05	3.71351e-07	1.28045	332.697	426	2373	0.150265	0.17952	region_1007,region_1008,region_1009,region_1010,region_1011,region_1012,region_1013,region_1014,region_1015,region_1016,region_1018,region_1020,region_1025,region_1033,region_1034,region_1036,region_1039,region_1042,region_1043,region_1044,region_1045,region_1046,region_1047,region_1048,region_1049,region_1053,region_1058,region_1059,region_1060,region_107,region_1070,region_1071,region_1072,regi…	AW146020,Abra,Adnp,Aff1,Aff3,Agl,Ahctf1,Akt2,Alg6,Arid4b,Arid5b,Arntl,Asxl1,Atf7ip,Atg10,Atoh1,Atoh7,B3galt1,B3gnt2,B3gnt7,B4galt1,Bach2,Barx2,Bbx,Bclaf1,Bcor,Bhlha15,Bhlhe23,Bhlhe40,Bmpr2,Brca1,Brms1l,Brwd1,C1d,Cand1,Casz1,Ccdc88a,Ccnh,Ccnl1,Cdca7l,Cdyl,Cggbp1,Chaf1b,Chd1,Chd7,Chd9,Chst8,Cited2,Clip3,Clock,Cnot2,Cnot6,Creb1,Creb3l2,Crebl2,Csrnp1,Ctbp2,Ctgf,Ctnnb1,Ctnnd2,Cux1,Dars,Ddx1,Dmbx1,Dmrt…
GO Biological Process	GO:0010467	gene expression	43	2.89995e-14	2.48903e-10	5.78843e-12	1.3266	448.514	595	0.213578	0.283333	280	5.77502e-06	0.049567	0.000177025	1.20697	357.091	431	2547	0.152028	0.169219	region_1007,region_1008,region_1009,region_1010,region_1011,region_1012,region_1013,region_1014,region_1015,region_1016,region_1018,region_1020,region_1025,region_1033,region_1034,region_1036,region_1037,region_1039,region_1045,region_1046,region_1047,region_1048,region_1049,region_1053,region_1058,region_1059,region_1060,region_107,region_1070,region_1071,region_1072,region_1073,region_108,regio…	1110034B05Rik,AW146020,Abra,Adad2,Adat1,Adnp,Aff1,Aff3,Ahctf1,Ahcyl1,Arid4b,Arid5b,Arntl,Asxl1,Atf7ip,Atoh1,Atoh7,Bach2,Barx2,Bbx,Bclaf1,Bcor,Bhlha15,Bhlhe23,Bhlhe40,Bmpr2,Brms1l,Brwd1,C1d,Cand1,Casz1,Ccnh,Ccnl1,Cdca7l,Cdk13,Cdyl,Celf4,Cggbp1,Chaf1b,Chd1,Chd7,Chd9,Chst8,Cited2,Clock,Cnot2,Cnot6,Corin,Cpe,Creb1,Creb3l2,Crebl2,Csrnp1,Cstf2t,Ctbp2,Ctnnb1,Ctnnd2,Cux1,Dars,Ddx1,Ddx39,Ddx47,Dis3,Dmbx1,…
GO Biological Process	GO:0048731	system development	44	8.11094e-14	6.96162e-10	1.58219e-11	1.25109	632.251	791	0.301072	0.376667	4	1.81581e-34	1.55851e-30	3.89627e-31	1.57787	372.654	588	2658	0.207407	0.221219	region_100,region_1007,region_1008,region_1009,region_1010,region_1011,region_1012,region_1013,region_1014,region_1015,region_1017,region_102,region_1025,region_1027,region_1028,region_103,region_1030,region_1038,region_104,region_1045,region_1046,region_1050,region_1052,region_1053,region_1058,region_1059,region_1069,region_107,region_1070,region_1071,region_1072,region_1073,region_1074,region_1…	2510003E04Rik,5830411N06Rik,A930038C07Rik,Aard,Abi2,Abl2,Acsl4,Actg1,Acvr1,Adam19,Adam9,Adcy1,Adm,Adnp,Agtpbp1,Ahctf1,Aldh1a2,Aldh1a3,Aldh5a1,Angpt1,Angptl3,Ank3,Ano1,Anpep,Anxa2,Anxa3,Apbb2,Aqp11,Aqp3,Arg1,Arhgap24,Arid5b,Asah1,Asns,Ass1,Atg5,Atic,Atl1,Atoh1,Atoh7,Axin2,B3gnt2,B4galt1,BC096441,Bai2,Barx2,Bbs4,Bcl2,Bcl2l11,Bcor,Bdh1,Bfsp1,Bfsp2,Bhlhe23,Bmp3,Bmp7,Bmper,Bmpr2,Boc,Bok,Bpgm,Brca1,C1g…
GO Biological Process	GO:0071840	cellular component organization or biogenesis	45	3.36464e-13	2.88787e-09	6.41748e-11	1.27276	544.487	693	0.25928	0.33	90	4.10876e-13	3.52655e-09	3.91839e-11	1.31864	400.413	528	2856	0.186243	0.184874	region_1,region_100,region_1008,region_1009,region_101,region_1010,region_1011,region_1012,region_1013,region_1014,region_1015,region_1016,region_1017,region_1019,region_102,region_1027,region_1028,region_103,region_1037,region_1038,region_104,region_1052,region_1054,region_1055,region_1056,region_1057,region_1058,region_1059,region_107,region_1070,region_1071,region_1072,region_1073,region_108,r…	1700071K01Rik,2810021B07Rik,4831426I19Rik,A4galt,A930038C07Rik,Aak1,Abca4,Abi2,Abl2,Acsl4,Actg1,Actn4,Adcy1,Adm,Adnp,Adsl,Agtpbp1,Ahctf1,Ahi1,Akap2,Anapc1,Anapc4,Angpt1,Ank3,Anxa2,Anxa3,Ap3b1,Apbb2,Aqp11,Arg1,Arhgap10,Arhgap26,Arhgap42,Arhgap5,Arhgef10l,Arl8b,Asap1,Asxl1,Atg16l1,Atg5,Atl1,Atl2,Atoh1,Atp6v0c,Atp6v1h,Axin2,B230120H23Rik,B3gnt2,B4galt1,Baiap2l1,Bbs10,Bbs4,Bcl2,Bcor,Becn1,Bfsp2,Bhlha…
GO Biological Process	GO:0009893	positive regulation of metabolic process	46	1.16164e-12	9.97036e-09	2.16747e-10	1.37328	327.684	450	0.15604	0.214286	30	2.22476e-19	1.90951e-15	6.36503e-17	1.60814	197.122	317	1406	0.111817	0.225462	region_100,region_1007,region_1008,region_1009,region_1010,region_1011,region_102,region_1025,region_1028,region_1029,region_103,region_1030,region_1039,region_104,region_1045,region_1046,region_1050,region_1053,region_1058,region_1059,region_1065,region_107,region_1070,region_1071,region_1072,region_1073,region_1076,region_1077,region_108,region_109,region_1090,region_1093,region_110,region_1101…	1700071K01Rik,Abra,Acvr1,Adam9,Adnp,Adra2a,Aff1,Ahctf1,Akt2,Aldh1a2,Angpt1,Angptl3,Anxa3,Arntl,Atf7ip,Atg10,Atoh1,Atxn1,Axin2,BC096441,Bambi,Barx2,Becn1,Bhlha15,Bhlhe23,Bmp3,Bmp7,Bmpr2,Brca1,Cacybp,Camk1d,Cand1,Caprin2,Ccl2,Ccnd2,Ccnh,Cd276,Cd28,Cd80,Cdh13,Celf4,Cited2,Clip3,Clock,Cntf,Cops5,Creb1,Creb3l2,Cryaa,Csf1,Csrnp1,Ctgf,Ctnnb1,Cul4b,Cyp26b1,Dab2,Ddx58,Dlx2,Dyrk2,E2f3,Ebf1,Ednra,Egr2,Ehf,E…
GO Biological Process	GO:0050793	regulation of developmental process	47	2.51623e-12	2.15968e-08	4.59506e-10	1.38497	303.977	421	0.144751	0.200476	14	1.41152e-24	1.21151e-20	8.65361e-22	1.77404	164.596	292	1174	0.102998	0.248722	region_100,region_1000,region_1001,region_1002,region_1007,region_1008,region_1009,region_101,region_1010,region_1011,region_1017,region_102,region_1025,region_1028,region_1029,region_103,region_1030,region_1031,region_104,region_1045,region_1046,region_1050,region_107,region_1071,region_1072,region_1073,region_1076,region_1077,region_108,region_1080,region_109,region_110,region_1110,region_1111,…	A930038C07Rik,Abl2,Accn1,Acvr1,Adam9,Adamts9,Adnp,Akap2,Angptl3,Ank,Anxa3,Ap3b1,Arhgap15,Atoh1,Axin2,B4galt1,BC096441,Bai2,Bai3,Bambi,Bcl2,Bcl2l11,Bcor,Bhlhe23,Bmp2k,Bmp7,Bmpr2,Boc,Brwd1,Btg1,Cacna1a,Camk1d,Caprin2,Car2,Cartpt,Ccdc88a,Ccl2,Ccnd2,Cd276,Cd28,Cd59a,Cd83,Cdc42ep3,Cdh2,Cdh4,Cdk6,Cited2,Clec2d,Cnr1,Cntf,Cntn2,Cntn4,Crhr2,Csf1,Ctla4,Ctnna1,Ctnnb1,Cxcr4,Cyp26b1,D130043K22Rik,Dab1,Dlg1,Dl…
GO Biological Process	GO:0071841	cellular component organization or biogenesis at cellular level	48	2.69368e-12	2.31199e-08	4.81664e-10	1.30055	445.197	579	0.211999	0.275714	81	5.75932e-14	4.94322e-10	6.10275e-12	1.37789	320.779	442	2288	0.155908	0.193182	region_1,region_100,region_1008,region_1009,region_101,region_1010,region_1011,region_1012,region_1013,region_1014,region_1015,region_1016,region_1017,region_1019,region_102,region_1027,region_1028,region_103,region_1037,region_104,region_1052,region_1058,region_1059,region_107,region_1070,region_1071,region_1072,region_1073,region_108,region_1085,region_1086,region_109,region_1095,region_110,reg…	1700071K01Rik,2810021B07Rik,4831426I19Rik,A930038C07Rik,Abi2,Abl2,Acsl4,Actg1,Actn4,Adcy1,Adm,Agtpbp1,Ahctf1,Ahi1,Akap2,Anapc1,Anapc4,Angpt1,Ank3,Anxa2,Ap3b1,Apbb2,Aqp11,Arhgap10,Arhgap26,Arhgap42,Arhgef10l,Arl8b,Asap1,Asxl1,Atg16l1,Atg5,Atl1,Atl2,Atoh1,Atp6v0c,Axin2,B230120H23Rik,B3gnt2,B4galt1,Baiap2l1,Bbs10,Bbs4,Bcl2,Bcor,Becn1,Bfsp2,Bhlha15,Bmp7,Bnip3l,Boc,Brca1,Brwd1,Bub3,C1d,Cacna1a,Cadm1,C…
GO Biological Process	GO:0048513	organ development	49	3.71024e-12	3.1845e-08	6.49897e-10	1.28077	487.207	624	0.232003	0.297143	13	3.57885e-26	3.07173e-22	2.36287e-23	1.5886	280.121	445	1998	0.156967	0.222723	region_100,region_1007,region_1008,region_1009,region_1010,region_1011,region_1012,region_1013,region_1014,region_1015,region_1017,region_102,region_1025,region_1027,region_1028,region_103,region_1030,region_1038,region_104,region_1045,region_1046,region_1052,region_1053,region_1058,region_1059,region_1069,region_107,region_1070,region_1071,region_1072,region_1073,region_1074,region_1076,region_1…	5830411N06Rik,Aard,Abi2,Acvr1,Adam19,Adam9,Adm,Agtpbp1,Ahctf1,Aldh1a2,Aldh1a3,Angpt1,Ano1,Anxa3,Aqp11,Aqp3,Arg1,Arid5b,Asah1,Asns,Ass1,Atg5,Atic,Atoh1,Axin2,B4galt1,Barx2,Bbs4,Bcl2,Bcl2l11,Bcor,Bdh1,Bfsp1,Bfsp2,Bhlhe23,Bmp3,Bmp7,Bmpr2,Bok,Bpgm,Brca1,C1galt1,Cacna1a,Cacybp,Cadm1,Calcr,Car2,Cckar,Ccl2,Ccnd2,Cd28,Cd9,Cdh23,Cdk13,Cdk6,Cdkl1,Cftr,Cga,Chd7,Cited2,Cln8,Cnga3,Cntf,Cntn2,Cntn4,Col13a1,Col…
GO Biological Process	GO:0048519	negative regulation of biological process	50	4.17081e-12	3.5798e-08	7.15961e-10	1.27671	495.806	633	0.236098	0.301429	36	6.31488e-19	5.42006e-15	1.50557e-16	1.44809	324.565	470	2315	0.165785	0.203024	region_10,region_100,region_1007,region_1008,region_1009,region_1010,region_1011,region_1012,region_1013,region_1014,region_1015,region_1016,region_1017,region_1018,region_102,region_1020,region_1021,region_1025,region_1026,region_1027,region_1028,region_1029,region_103,region_1031,region_1035,region_1036,region_1039,region_104,region_1045,region_1046,region_1050,region_1053,region_1058,region_10…	1500015O10Rik,1700071K01Rik,A930038C07Rik,Abcg8,Accn1,Acer2,Actn4,Acvr1,Adcyap1,Adm,Adnp,Adra2a,Akap1,Akt2,Aldh1a2,Amigo2,Angpt1,Anpep,Anxa2,Aoah,Apbb2,Arhgap10,Asns,Atf7ip,Atg5,Atxn1,Axin2,B230120H23Rik,B4galt1,Bai2,Bai3,Bambi,Bard1,Barx2,Bcl2,Bclaf1,Bcor,Bdkrb2,Becn1,Bhlhe23,Bhlhe40,Bmp7,Bmper,Bmpr2,Bnip3l,Brca1,Btg1,Btn2a2,C1d,Cacna1a,Cacybp,Calcr,Caprin2,Cartpt,Ccl2,Cd276,Cd46,Cd59a,Cd83,Cd9,…
GO Biological Process	GO:0010628	positive regulation of gene expression	51	1.18881e-11	1.02036e-07	2.0007e-09	1.43108	238.98	342	0.1138	0.162857	37	6.57675e-19	5.64482e-15	1.52563e-16	1.76191	129.405	228	923	0.0804233	0.247021	region_100,region_1007,region_1008,region_1009,region_1010,region_1011,region_1025,region_1028,region_1029,region_1039,region_1045,region_1046,region_1050,region_1053,region_1065,region_107,region_1070,region_1071,region_1072,region_1073,region_1076,region_1077,region_108,region_109,region_1090,region_1093,region_110,region_1101,region_1105,region_1106,region_1110,region_1114,region_1116,region_1…	1700071K01Rik,Abra,Acvr1,Aff1,Ahctf1,Akt2,Aldh1a2,Arntl,Atf7ip,Atoh1,Atxn1,Bambi,Barx2,Bhlha15,Bhlhe23,Bmp3,Bmp7,Brca1,Cand1,Caprin2,Ccnh,Cd28,Cdh13,Cited2,Clock,Cops5,Creb1,Creb3l2,Csf1,Csrnp1,Ctgf,Ctnnb1,Cyp26b1,Dab2,Ddx58,Dlx2,E2f3,Ebf1,Egr2,Ehf,En2,Eomes,Epas1,Esrrb,Esrrg,Etv1,Etv5,Evx1,Eya1,Fbxw11,Fezf1,Fezf2,Fgf1,Fgf23,Fgf9,Foxc1,Foxd1,Foxd2,Foxd3,Foxi1,Foxj3,Foxk1,Foxo1,Foxo6,Foxp1,Fzd1,Fz…
GO Biological Process	GO:0016043	cellular component organization	52	1.34278e-11	1.15251e-07	2.21636e-09	1.25694	531.451	668	0.253072	0.318095	100	2.38483e-12	2.0469e-08	2.0469e-10	1.31583	383.029	504	2732	0.177778	0.18448	region_1,region_100,region_1008,region_1009,region_101,region_1010,region_1011,region_1012,region_1013,region_1014,region_1015,region_1016,region_1017,region_1019,region_102,region_1027,region_1028,region_103,region_1038,region_104,region_1052,region_1054,region_1055,region_1056,region_1057,region_1058,region_1059,region_107,region_1070,region_1071,region_1072,region_1073,region_108,region_1085,r…	1700071K01Rik,2810021B07Rik,4831426I19Rik,A4galt,A930038C07Rik,Aak1,Abca4,Abi2,Abl2,Acsl4,Actg1,Actn4,Adcy1,Adm,Adnp,Adsl,Agtpbp1,Ahctf1,Ahi1,Akap2,Anapc1,Anapc4,Angpt1,Ank3,Anxa2,Anxa3,Ap3b1,Apbb2,Aqp11,Arg1,Arhgap10,Arhgap26,Arhgap42,Arhgap5,Arhgef10l,Arl8b,Asap1,Asxl1,Atg16l1,Atg5,Atl1,Atl2,Atoh1,Atp6v0c,Atp6v1h,Axin2,B230120H23Rik,B3gnt2,B4galt1,Baiap2l1,Bbs10,Bbs4,Bcl2,Bcor,Becn1,Bfsp2,Bhlha…
GO Biological Process	GO:0032501	multicellular organismal process	53	1.55751e-11	1.33681e-07	2.52228e-09	1.17267	877.482	1029	0.417849	0.49	293	1.05824e-05	0.0908286	0.000309995	1.12846	723.997	817	5164	0.288183	0.158211	region_0,region_10,region_100,region_1007,region_1008,region_1009,region_101,region_1010,region_1011,region_1012,region_1013,region_1014,region_1015,region_1017,region_1018,region_102,region_1020,region_1021,region_1025,region_1027,region_1028,region_103,region_1030,region_1038,region_104,region_1045,region_1046,region_105,region_1050,region_1052,region_1053,region_1058,region_1059,region_1069,re…	2510003E04Rik,4930447C04Rik,5830411N06Rik,A930038C07Rik,AK053790,Aard,Abca4,Abcg8,Abi2,Abl2,Accn1,Aco1,Acsl4,Actg1,Acvr1,Adam19,Adam9,Adcy1,Adcy3,Adcy5,Adcy8,Adm,Adnp,Adra2a,Adrb3,Aff3,Agtpbp1,Ahctf1,Aim2,Akr1d1,Akt2,Aldh1a2,Aldh1a3,Aldh5a1,Angpt1,Angptl3,Ank2,Ank3,Ano1,Anpep,Anxa2,Anxa3,Ap3b1,Apba2,Apbb2,Aqp11,Aqp3,Arfrp1,Arg1,Arhgap24,Arid5b,Asah1,Asns,Ass1,Atg5,Atic,Atl1,Atoh1,Atoh7,Atxn1,Axin…
GO Biological Process	GO:0006996	organelle organization	54	1.67525e-11	1.43787e-07	2.66272e-09	1.41277	253.404	358	0.120668	0.170476	330	3.62284e-05	0.310948	0.000942268	1.25126	213.386	267	1522	0.0941799	0.175427	region_1,region_1008,region_1009,region_1010,region_1011,region_1012,region_1013,region_1014,region_1015,region_1016,region_1019,region_102,region_103,region_104,region_1052,region_1058,region_1059,region_107,region_1070,region_1071,region_1072,region_1073,region_108,region_1085,region_1086,region_109,region_110,region_1105,region_1106,region_1125,region_1126,region_1132,region_1137,region_1150,r…	1700071K01Rik,2810021B07Rik,4831426I19Rik,Abl2,Actg1,Actn4,Agtpbp1,Ahctf1,Akap2,Anapc1,Anapc4,Ap3b1,Aqp11,Arhgap10,Arhgef10l,Arl8b,Asxl1,Atg16l1,Atg5,Atl1,Atl2,Atp6v0c,Axin2,B230120H23Rik,Bbs4,Bcl2,Bcor,Becn1,Bfsp2,Bhlha15,Bnip3l,Brca1,Brwd1,Bub3,Cadps,Cald1,Cap2,Ccdc88a,Cckar,Cdc25b,Cdca2,Cdyl,Cep164,Chaf1b,Chchd3,Chd1,Chd1l,Chd7,Chd9,Clasp1,Cln8,Clock,Cltc,Clvs1,Cntn2,Col4a3bp,Coq7,Cox10,Cryaa,…
GO Biological Process	GO:2000026	regulation of multicellular organismal development	55	1.70925e-11	1.46705e-07	2.66737e-09	1.41	256.029	361	0.121919	0.171905	16	1.73586e-23	1.48989e-19	9.3118e-21	1.85509	132.069	245	942	0.0864198	0.260085	region_100,region_1007,region_1008,region_1009,region_101,region_1010,region_1011,region_1017,region_102,region_1025,region_1028,region_1029,region_103,region_1030,region_1031,region_104,region_1045,region_1046,region_1050,region_107,region_1071,region_1072,region_1073,region_1076,region_1077,region_108,region_1080,region_109,region_110,region_1110,region_1111,region_1114,region_1123,region_1131,…	A930038C07Rik,Abl2,Accn1,Acvr1,Adnp,Angptl3,Ank,Anxa3,Ap3b1,Atoh1,Axin2,B4galt1,BC096441,Bai2,Bai3,Bambi,Bcl2,Bcor,Bhlhe23,Bmp2k,Bmp7,Bmpr2,Boc,Btg1,Cacna1a,Camk1d,Caprin2,Car2,Cartpt,Ccdc88a,Ccl2,Ccnd2,Cd276,Cd28,Cd59a,Cd83,Cdh2,Cdh4,Cdk6,Cited2,Clec2d,Cnr1,Cntf,Cntn2,Cntn4,Crhr2,Csf1,Ctla4,Ctnna1,Ctnnb1,Cxcr4,D130043K22Rik,Dab1,Dlx2,Dusp6,Ednra,Epb4.1l5,Epha2,Epha4,Etv5,Eya1,Ezh2,F3,Fbxo22,Fbxw…
GO Biological Process	GO:0045595	regulation of cell differentiation	56	2.01449e-11	1.72904e-07	3.08757e-09	1.43407	231.509	332	0.110242	0.158095	15	6.78685e-24	5.82516e-20	3.88344e-21	1.93266	115.385	223	823	0.0786596	0.27096	region_100,region_1000,region_1001,region_1002,region_1007,region_1008,region_1009,region_101,region_1010,region_1011,region_1017,region_1025,region_1028,region_1029,region_103,region_1030,region_1031,region_104,region_1045,region_1046,region_1050,region_107,region_1071,region_1072,region_1073,region_1076,region_1077,region_108,region_109,region_110,region_1110,region_1111,region_1114,region_1123…	A930038C07Rik,Abl2,Acvr1,Adamts9,Adnp,Ap3b1,Atoh1,Axin2,B4galt1,Bambi,Bcl2,Bhlhe23,Bmp7,Bmpr2,Boc,Btg1,Cacna1a,Camk1d,Caprin2,Car2,Cartpt,Ccdc88a,Ccnd2,Cd276,Cd83,Cdh2,Cdh4,Cdk6,Clec2d,Cnr1,Cntf,Cntn2,Cntn4,Csf1,Ctla4,Ctnna1,Ctnnb1,Cxcr4,Cyp26b1,D130043K22Rik,Dab1,Dlx2,Dusp10,Dusp6,Enpp1,Eomes,Epb4.1l5,Epha4,Esrrb,Etv5,Eya1,Ezh2,Fbxo22,Fezf1,Fgf18,Fgf23,Fgf9,Fgfr1,Foxo6,Foxp1,Fst,Fzd1,Fzd7,Gata3,…
GO Biological Process	GO:0071842	cellular component organization at cellular level	57	3.45475e-11	2.96521e-07	5.20213e-09	1.28851	434.611	560	0.206958	0.266667	89	3.19675e-13	2.74377e-09	3.08289e-11	1.37618	305.918	421	2182	0.148501	0.192942	region_1,region_100,region_1008,region_1009,region_101,region_1010,region_1011,region_1012,region_1013,region_1014,region_1015,region_1016,region_1017,region_1019,region_102,region_1027,region_1028,region_103,region_104,region_1052,region_1058,region_1059,region_107,region_1070,region_1071,region_1072,region_1073,region_108,region_1085,region_1086,region_109,region_1095,region_110,region_1105,reg…	1700071K01Rik,2810021B07Rik,4831426I19Rik,A930038C07Rik,Abi2,Abl2,Acsl4,Actg1,Actn4,Adcy1,Adm,Agtpbp1,Ahctf1,Ahi1,Akap2,Anapc1,Anapc4,Angpt1,Ank3,Anxa2,Ap3b1,Apbb2,Aqp11,Arhgap10,Arhgap26,Arhgap42,Arhgef10l,Arl8b,Asap1,Asxl1,Atg16l1,Atg5,Atl1,Atl2,Atoh1,Atp6v0c,Axin2,B230120H23Rik,B3gnt2,B4galt1,Baiap2l1,Bbs10,Bbs4,Bcl2,Bcor,Becn1,Bfsp2,Bhlha15,Bmp7,Bnip3l,Boc,Brca1,Brwd1,Bub3,Cacna1a,Cadm1,Cadps…
GO Biological Process	GO:0051239	regulation of multicellular organismal process	58	3.9322e-11	3.37501e-07	5.81898e-09	1.32115	367.106	485	0.174812	0.230952	21	1.47783e-22	1.26842e-18	6.04009e-20	1.63941	210.441	345	1501	0.121693	0.229847	region_100,region_1007,region_1008,region_1009,region_101,region_1010,region_1011,region_1012,region_1013,region_1014,region_1015,region_1017,region_1018,region_102,region_1020,region_1025,region_1028,region_1029,region_103,region_1030,region_1031,region_1038,region_104,region_1045,region_1046,region_1050,region_107,region_1071,region_1072,region_1073,region_1076,region_1077,region_108,region_108…	A930038C07Rik,Abcg8,Abl2,Accn1,Acvr1,Adm,Adnp,Adra2a,Akap1,Angptl3,Ank,Anpep,Anxa2,Anxa3,Ap3b1,Atoh1,Axin2,B4galt1,BC096441,Bai2,Bai3,Bambi,Bcl2,Bcor,Bhlhe23,Bhlhe40,Bmp2k,Bmp7,Bmpr2,Boc,Btg1,Btn2a2,Cacna1a,Cacna1b,Cacna1e,Cadm1,Calcr,Cald1,Camk1d,Camk2d,Caprin2,Car2,Cartpt,Casq2,Ccdc88a,Cckar,Ccl2,Ccnd2,Cd276,Cd28,Cd59a,Cd83,Cdh2,Cdh4,Cdk6,Cftr,Chd7,Chrm2,Chrna7,Cited2,Clec2d,Cnr1,Cntf,Cntn2,Cnt…
GO Biological Process	GO:0031325	positive regulation of cellular metabolic process	59	4.92796e-11	4.22967e-07	7.16893e-09	1.35492	310.721	421	0.147962	0.200476	42	4.97277e-18	4.26813e-14	1.01622e-15	1.60296	185.906	298	1326	0.105115	0.224736	region_100,region_1007,region_1008,region_1009,region_1010,region_1011,region_102,region_1025,region_1028,region_1029,region_103,region_1030,region_1039,region_104,region_1045,region_1046,region_1050,region_1053,region_1058,region_1059,region_1065,region_107,region_1070,region_1071,region_1072,region_1073,region_1076,region_1077,region_108,region_109,region_1090,region_1093,region_110,region_1101…	1700071K01Rik,Abra,Acvr1,Adam9,Adnp,Adra2a,Aff1,Ahctf1,Akt2,Angpt1,Anxa3,Arntl,Atf7ip,Atg10,Atoh1,Atxn1,Axin2,BC096441,Bambi,Barx2,Becn1,Bhlha15,Bhlhe23,Bmp3,Bmp7,Bmpr2,Brca1,Cacybp,Cand1,Caprin2,Ccnd2,Ccnh,Cd276,Cd28,Cd80,Celf4,Cited2,Clip3,Clock,Cntf,Cops5,Creb1,Creb3l2,Cryaa,Csf1,Csrnp1,Ctgf,Ctnnb1,Dab2,Ddx58,Dlx2,Dyrk2,E2f3,Ebf1,Ednra,Egr2,Ehf,En2,Eomes,Epas1,Esrrb,Esrrg,Etv1,Etv5,Evx1,Eya1,E…
GO Biological Process	GO:0009653	anatomical structure morphogenesis	60	6.21945e-11	5.33815e-07	8.89692e-09	1.30234	396.21	516	0.188671	0.245714	8	8.29257e-30	7.11751e-26	8.89689e-27	1.75662	207.217	364	1478	0.128395	0.246279	region_100,region_1008,region_1009,region_101,region_1010,region_1011,region_1012,region_1013,region_1014,region_1015,region_102,region_1023,region_1025,region_1027,region_1028,region_103,region_104,region_1052,region_107,region_1070,region_1071,region_1072,region_1073,region_1074,region_108,region_1084,region_1088,region_1089,region_109,region_110,region_1105,region_1106,region_1110,region_1111,…	AK053790,Actg1,Acvr1,Adcy1,Adm,Aff3,Agtpbp1,Ahi1,Aldh1a2,Aldh1a3,Angpt1,Angptl3,Ank3,Anpep,Anxa2,Anxa3,Apbb2,Aqp3,Arfrp1,Arg1,Arhgap24,Arid5b,Asap1,Atic,Atl1,Atoh1,Axin2,B3gnt2,B4galt1,BC096441,Barx2,Bbs10,Bbs4,Bcl2,Bcl2l11,Bcor,Bhlhe23,Bmp7,Bmper,Bmpr2,Boc,Brca1,C1galt1,Cacna1a,Cadm1,Cap2,Car2,Cckar,Ccl2,Cd9,Cdh13,Cdh2,Cdh23,Cdh4,Chd7,Chn2,Cited2,Cnga3,Cntf,Cntn2,Cobl,Col13a1,Col4a3bp,Coq7,Cpe,C…
GO Biological Process	GO:0006357	regulation of transcription from RNA polymerase II promoter	61	8.66601e-11	7.43803e-07	1.21935e-08	1.40858	241.378	340	0.114942	0.161905	33	3.53493e-19	3.03403e-15	9.19403e-17	1.76039	131.789	232	940	0.0818342	0.246808	region_100,region_1007,region_1008,region_1009,region_1010,region_1011,region_1012,region_1013,region_1014,region_1015,region_1016,region_1020,region_1025,region_1028,region_1039,region_1045,region_1046,region_1050,region_1053,region_1059,region_1060,region_1065,region_107,region_1070,region_1071,region_1072,region_1073,region_1076,region_1077,region_108,region_109,region_1090,region_1093,region_…	1700071K01Rik,Abra,Akt2,Arntl,Atf7ip,Atoh1,Atxn1,Barx2,Bcor,Bhlha15,Bhlhe23,Bmp3,Brca1,Brwd1,Brwd1,Cand1,Caprin2,Ccnh,Cd28,Cdk13,Cited2,Clock,Cops5,Creb1,Csrnp1,Ctnnb1,Cux1,Dbx1,Ddx58,Dlx2,Dmbx1,Egr2,Ehmt1,Elp4,En2,Eomes,Epas1,Esrrb,Evx1,Eya1,Ezh2,Fezf1,Fezf2,Fgf1,Fgfr1,Foxb1,Foxc1,Foxd1,Foxd2,Foxd3,Foxi1,Foxi3,Foxj3,Foxk1,Foxn2,Foxn3,Foxo1,Foxo6,Foxp1,Fst,Fzd1,Fzd5,Fzd6,Fzd7,Fzd9,Gata3,Gata5,Gat…
GO Biological Process	GO:0048523	negative regulation of cellular process	62	1.081e-10	9.2782e-07	1.49648e-08	1.27175	456.063	580	0.217173	0.276191	50	3.11055e-17	2.66979e-13	5.33957e-15	1.44887	295.403	428	2107	0.15097	0.203132	region_10,region_100,region_1007,region_1008,region_1009,region_1010,region_1011,region_1012,region_1013,region_1014,region_1015,region_1016,region_1017,region_1018,region_102,region_1020,region_1021,region_1025,region_1026,region_1027,region_1028,region_1029,region_103,region_1031,region_1035,region_1036,region_1039,region_104,region_1045,region_1046,region_1050,region_1053,region_1058,region_10…	1500015O10Rik,1700071K01Rik,A930038C07Rik,Accn1,Acer2,Actn4,Acvr1,Adcyap1,Adm,Adnp,Adra2a,Akap1,Akt2,Aldh1a2,Amigo2,Angpt1,Apbb2,Arhgap10,Asns,Atf7ip,Atg5,Atxn1,Axin2,B230120H23Rik,B4galt1,Bambi,Bard1,Barx2,Bcl2,Bclaf1,Bcor,Bdkrb2,Becn1,Bhlhe23,Bhlhe40,Bmp7,Bmper,Bmpr2,Bnip3l,Brca1,Btg1,Btn2a2,C1d,Cacna1a,Cacybp,Caprin2,Cartpt,Ccl2,Cd276,Cd59a,Cd9,Cda,Cdh13,Cdk6,Cited2,Clasp1,Clec2d,Clip3,Cln8,Cn…
GO Biological Process	GO:0045935	positive regulation of nucleobase-containing compound metabolic process	63	1.14205e-10	9.8022e-07	1.5559e-08	1.40256	244.553	343	0.116454	0.163333	38	2.60766e-18	2.23816e-14	5.88988e-16	1.73115	134.593	233	960	0.0821869	0.242708	region_100,region_1007,region_1008,region_1009,region_1010,region_1011,region_1025,region_1028,region_1029,region_1039,region_1045,region_1046,region_1050,region_1053,region_1065,region_107,region_1070,region_1071,region_1072,region_1073,region_1076,region_1077,region_108,region_109,region_1090,region_1093,region_110,region_1101,region_1105,region_1106,region_1110,region_1114,region_1116,region_1…	1700071K01Rik,Abra,Acvr1,Adnp,Aff1,Ahctf1,Akt2,Anxa3,Arntl,Atf7ip,Atoh1,Atxn1,BC096441,Bambi,Barx2,Bhlha15,Bhlhe23,Bmp3,Bmp7,Brca1,Cacybp,Cand1,Caprin2,Ccnh,Cd28,Celf4,Cited2,Clock,Cops5,Creb1,Creb3l2,Csrnp1,Ctnnb1,Dab2,Ddx58,Dlx2,E2f3,Ebf1,Egr2,Ehf,En2,Eomes,Epas1,Esrrb,Esrrg,Etv1,Etv5,Evx1,Eya1,Eya3,Fbxw11,Fezf1,Fezf2,Fgf1,Fgf23,Fgf9,Foxc1,Foxd1,Foxd2,Foxd3,Foxi1,Foxj3,Foxk1,Foxo1,Foxo6,Foxp1,F…
GO Biological Process	GO:0006950	response to stress	64	1.63379e-10	1.40228e-06	2.19106e-08	1.34013	317.134	425	0.151016	0.202381	270	3.61853e-06	0.0310579	0.000115029	1.25375	261.615	328	1866	0.115697	0.175777	region_1018,region_1019,region_102,region_1020,region_1021,region_1023,region_1027,region_1028,region_1031,region_1038,region_1042,region_1043,region_1044,region_1058,region_1059,region_1071,region_1072,region_1073,region_1076,region_1077,region_1085,region_1086,region_1089,region_1094,region_1095,region_1098,region_1099,region_1100,region_1105,region_1106,region_111,region_1110,region_1111,regio…	1500015O10Rik,2310035K24Rik,6330577E15Rik,Actn4,Acvr1,Adam9,Adm,Adra2a,Adrb3,Adsl,Aen,Akt2,Aldh3a1,Alkbh3,Angpt1,Anxa3,Ap3b1,Arg1,Arhgef19,Arpp21,Asns,Ass1,Atg10,Atg16l1,Atg5,B230120H23Rik,B4galt1,Bard1,Bcl2,Bdh1,Bdkrb2,Becn1,Bmpr2,Bnip3l,Brca1,Btg1,C330006K01Rik,C8b,Cacna1a,Cacna1b,Cacna1e,Calcoco2,Camk1d,Car2,Cartpt,Cckar,Ccl2,Cd180,Cd86,Cd9,Cep164,Chaf1b,Chd1l,Chordc1,Cited2,Clca3,Clec2d,Cln8,…
GO Biological Process	GO:0045893	positive regulation of transcription, DNA-dependent	65	2.32709e-10	1.99734e-06	3.07283e-08	1.416	224.577	318	0.106941	0.151429	29	1.67139e-19	1.43456e-15	4.94675e-17	1.81027	119.872	217	855	0.0765432	0.253801	region_100,region_1007,region_1008,region_1009,region_1010,region_1011,region_1025,region_1028,region_1029,region_1039,region_1045,region_1046,region_1050,region_1053,region_1065,region_107,region_1070,region_1071,region_1072,region_1073,region_1076,region_1077,region_108,region_109,region_1090,region_1093,region_110,region_1101,region_1105,region_1106,region_1110,region_1114,region_1116,region_1…	1700071K01Rik,Abra,Acvr1,Aff1,Ahctf1,Akt2,Arntl,Atf7ip,Atoh1,Atxn1,Bambi,Barx2,Bhlha15,Bhlhe23,Bmp3,Bmp7,Brca1,Cand1,Caprin2,Ccnh,Cd28,Cited2,Clock,Cops5,Creb1,Creb3l2,Csrnp1,Ctnnb1,Dab2,Ddx58,Dlx2,E2f3,Ebf1,Egr2,Ehf,En2,Eomes,Epas1,Esrrb,Esrrg,Etv1,Etv5,Evx1,Eya1,Fbxw11,Fezf1,Fezf2,Fgf1,Fgf23,Fgf9,Foxc1,Foxd1,Foxd2,Foxd3,Foxi1,Foxj3,Foxk1,Foxo1,Foxo6,Foxp1,Fzd1,Fzd7,Gata3,Gata5,Gata6,Gdf6,Gdnf,G…
GO Biological Process	GO:0051173	positive regulation of nitrogen compound metabolic process	66	2.42008e-10	2.07715e-06	3.1472e-08	1.39242	247.051	344	0.117643	0.163809	48	1.76673e-17	1.51638e-13	3.15913e-15	1.7031	137.397	234	980	0.0825397	0.238776	region_100,region_1007,region_1008,region_1009,region_1010,region_1011,region_1025,region_1028,region_1029,region_1039,region_1045,region_1046,region_1050,region_1053,region_1065,region_107,region_1070,region_1071,region_1072,region_1073,region_1076,region_1077,region_108,region_109,region_1090,region_1093,region_110,region_1101,region_1105,region_1106,region_1110,region_1114,region_1116,region_1…	1700071K01Rik,Abra,Acvr1,Adnp,Aff1,Ahctf1,Akt2,Anxa3,Arntl,Atf7ip,Atoh1,Atxn1,BC096441,Bambi,Barx2,Bhlha15,Bhlhe23,Bmp3,Bmp7,Brca1,Cacybp,Cand1,Caprin2,Ccnh,Cd28,Celf4,Cited2,Clock,Cops5,Creb1,Creb3l2,Csrnp1,Ctnnb1,Dab2,Ddx58,Dlx2,E2f3,Ebf1,Egr2,Ehf,En2,Eomes,Epas1,Esrrb,Esrrg,Etv1,Etv5,Evx1,Eya1,Eya3,Fbxw11,Fezf1,Fezf2,Fgf1,Fgf23,Fgf9,Foxc1,Foxd1,Foxd2,Foxd3,Foxi1,Foxj3,Foxk1,Foxo1,Foxo6,Foxp1,F…
GO Biological Process	GO:0010557	positive regulation of macromolecule biosynthetic process	67	3.884e-10	3.33364e-06	4.97557e-08	1.39234	242.038	337	0.115256	0.160476	43	5.16443e-18	4.43263e-14	1.03084e-15	1.71738	136.836	235	976	0.0828924	0.240779	region_100,region_1007,region_1008,region_1009,region_1010,region_1011,region_1025,region_1028,region_1029,region_1039,region_1045,region_1046,region_1050,region_1053,region_1065,region_107,region_1070,region_1071,region_1072,region_1073,region_1076,region_1077,region_108,region_109,region_1090,region_1093,region_110,region_1101,region_1105,region_1106,region_1110,region_1114,region_1116,region_1…	1700071K01Rik,Abra,Acvr1,Aff1,Ahctf1,Akt2,Arntl,Atf7ip,Atoh1,Atxn1,Bambi,Barx2,Bhlha15,Bhlhe23,Bmp3,Bmp7,Brca1,Cacybp,Cand1,Caprin2,Ccl2,Ccnh,Cd276,Cd28,Cited2,Clock,Cops5,Creb1,Creb3l2,Csrnp1,Ctgf,Ctnnb1,Dab2,Ddx58,Dlx2,Dyrk2,E2f3,Ebf1,Egr2,Ehf,En2,Eomes,Epas1,Esrrb,Esrrg,Etv1,Etv5,Evx1,Eya1,Fbxw11,Fezf1,Fezf2,Fgf1,Fgf23,Fgf9,Foxc1,Foxd1,Foxd2,Foxd3,Foxi1,Foxj3,Foxk1,Foxo1,Foxo6,Foxp1,Fzd1,Fzd7,…
GO Biological Process	GO:0019538	protein metabolic process	68	4.09197e-10	3.51213e-06	5.1649e-08	1.26402	452.523	572	0.215487	0.272381	719	0.00283542	1	0.0338476	1.12247	394.665	443	2815	0.156261	0.157371	region_0,region_1,region_1000,region_1001,region_1002,region_1012,region_1013,region_1014,region_1015,region_1016,region_1019,region_102,region_1035,region_1036,region_1040,region_1042,region_1043,region_1044,region_1047,region_1048,region_1049,region_105,region_1051,region_1053,region_1060,region_1061,region_1062,region_1063,region_1065,region_1066,region_107,region_1070,region_1071,region_1072,…	1500015O10Rik,1700071K01Rik,4833442J19Rik,A930038C07Rik,Aak1,Abl2,Acvr1,Adam12,Adam19,Adam32,Adam9,Adamts16,Adamts18,Adamts9,Adnp,Adra2a,Agtpbp1,Akt2,Alg6,Anapc1,Anapc4,Anpep,Arhgef10l,Arih1,Atg10,Atg5,B230120H23Rik,B3galt1,B3gnt2,B3gnt7,B4galt1,Bag2,Bard1,Bbs10,Bcl2,Bcor,Bmp2k,Bmp7,Bmpr2,Bnip3l,Brca1,Btg1,C8b,Camk1d,Camk1g,Camk2d,Cand1,Cartpt,Ccnh,Cct6b,Cd46,Cdc25b,Cdc7,Cdk13,Cdk15,Cdk17,Cdk20,C…
GO Biological Process	GO:0060284	regulation of cell development	69	4.86762e-10	4.17788e-06	6.0549e-08	1.53886	139.714	215	0.0665304	0.102381	20	1.44648e-22	1.24151e-18	6.20756e-20	2.30031	60.4265	139	431	0.04903	0.322506	region_100,region_1017,region_1028,region_103,region_1030,region_104,region_1045,region_1046,region_1050,region_107,region_1071,region_1072,region_1073,region_108,region_109,region_110,region_1123,region_1131,region_1150,region_1151,region_1152,region_1155,region_1156,region_1163,region_1164,region_1168,region_1184,region_1194,region_1215,region_1223,region_1248,region_1250,region_1255,region_125…	A930038C07Rik,Abl2,Adnp,Atoh1,Axin2,B4galt1,Bambi,Bcl2,Bhlhe23,Bmp7,Boc,Cacna1a,Camk1d,Caprin2,Ccdc88a,Ccnd2,Cdh2,Cdh4,Cnr1,Cntf,Cntn2,Cntn4,Ctnna1,Ctnnb1,Cxcr4,D130043K22Rik,Dab1,Dlx2,Dusp10,Epb4.1l5,Epha4,Etv5,Eya1,Ezh2,Fbxo22,Fezf1,Fgfr1,Gdf6,Gdnf,Hdac2,Hes1,Id2,Id4,Ifng,Igfbp3,Irx3,Jag1,Kalrn,Lef1,Lmx1a,Lrrk2,Maml1,Mark2,Mbp,Mtap1b,Mycn,Nedd4,Nefl,Neurod1,Neurog1,Neurog3,Nf1,Ngf,Nkx2-2,Nlgn1,…
GO Biological Process	GO:0051254	positive regulation of RNA metabolic process	70	5.34343e-10	4.58626e-06	6.55181e-08	1.40218	228.929	321	0.109014	0.152857	34	4.29061e-19	3.68263e-15	1.08313e-16	1.79134	122.255	219	872	0.0772487	0.251147	region_100,region_1007,region_1008,region_1009,region_1010,region_1011,region_1025,region_1028,region_1029,region_1039,region_1045,region_1046,region_1050,region_1053,region_1065,region_107,region_1070,region_1071,region_1072,region_1073,region_1076,region_1077,region_108,region_109,region_1090,region_1093,region_110,region_1101,region_1105,region_1106,region_1110,region_1114,region_1116,region_1…	1700071K01Rik,Abra,Acvr1,Aff1,Ahctf1,Akt2,Arntl,Atf7ip,Atoh1,Atxn1,Bambi,Barx2,Bhlha15,Bhlhe23,Bmp3,Bmp7,Brca1,Cand1,Caprin2,Ccnh,Cd28,Celf4,Cited2,Clock,Cops5,Creb1,Creb3l2,Csrnp1,Ctnnb1,Dab2,Ddx58,Dlx2,E2f3,Ebf1,Egr2,Ehf,En2,Eomes,Epas1,Esrrb,Esrrg,Etv1,Etv5,Evx1,Eya1,Fbxw11,Fezf1,Fezf2,Fgf1,Fgf23,Fgf9,Foxc1,Foxd1,Foxd2,Foxd3,Foxi1,Foxj3,Foxk1,Foxo1,Foxo6,Foxp1,Fzd1,Fzd7,Gata3,Gata5,Gata6,Gdf6,…
GO Biological Process	GO:0044267	cellular protein metabolic process	71	8.13475e-10	6.98206e-06	9.83388e-08	1.29312	375.063	485	0.178601	0.230952	349	5.62666e-05	0.482936	0.00138377	1.19564	315.312	377	2249	0.132981	0.16763	region_0,region_1,region_1012,region_1013,region_1014,region_1015,region_1016,region_1019,region_102,region_1035,region_1036,region_1040,region_1042,region_1043,region_1044,region_1047,region_1048,region_1049,region_105,region_1051,region_1053,region_1060,region_1061,region_1062,region_1063,region_1065,region_107,region_1070,region_1071,region_1072,region_1073,region_108,region_1087,region_109,re…	1500015O10Rik,1700071K01Rik,4833442J19Rik,A930038C07Rik,Aak1,Abl2,Acvr1,Adam9,Adnp,Adra2a,Agtpbp1,Akt2,Alg6,Anapc1,Anapc4,Arhgef10l,Arih1,Atg10,Atg5,B230120H23Rik,B3galt1,B3gnt2,B3gnt7,B4galt1,Bard1,Bbs10,Bcl2,Bcor,Bmp2k,Bmp7,Bmpr2,Bnip3l,Brca1,Btg1,Camk1d,Camk1g,Camk2d,Cand1,Cartpt,Ccnh,Cct6b,Cdc25b,Cdc7,Cdk13,Cdk15,Cdk17,Cdk20,Cdk6,Cdkl1,Cdkl4,Cdyl,Chordc1,Clip3,Cln8,Clock,Col3a1,Cops5,Creb1,Cs…
GO Biological Process	GO:0051094	positive regulation of developmental process	72	8.52532e-10	7.31728e-06	1.01629e-07	1.47806	167.111	247	0.0795766	0.117619	63	4.93186e-15	4.23302e-11	6.71907e-13	1.88653	77.3908	146	552	0.0514991	0.264493	region_100,region_1000,region_1001,region_1002,region_1008,region_1009,region_101,region_1010,region_1011,region_102,region_1028,region_103,region_104,region_1045,region_1046,region_1050,region_107,region_1076,region_1077,region_108,region_109,region_110,region_1111,region_1123,region_1137,region_1150,region_1151,region_1152,region_1155,region_1156,region_1163,region_1164,region_1215,region_1218,…	Accn1,Acvr1,Adam9,Adamts9,Adnp,Angptl3,Anxa3,Ap3b1,Atoh1,Axin2,B4galt1,Bambi,Bcl2,Bmp7,Bmpr2,Boc,Btg1,Caprin2,Car2,Cd276,Cd83,Cdh4,Cited2,Cntf,Csf1,Ctnnb1,Cxcr4,Cyp26b1,Dab1,Dlg1,Ednra,Eomes,Epb4.1l5,Etv5,F3,Fezf1,Fgf1,Fgf18,Fgf3,Fgf9,Fgfr1,Foxd1,Foxd2,Foxp1,Fst,Gata3,Gata6,Gdf6,Gdnf,Ghr,Gnas,Hdac2,Hes1,Hif1a,Hlx,Hmgcr,Id2,Id4,Ifng,Igfbp3,Il15,Il17a,Il4,Il7,Inpp5d,Irx3,Itgb3,Jag1,Jak2,Kdm1a,Kitl,…
GO Biological Process	GO:0042221	response to chemical stimulus	73	9.27547e-10	7.96114e-06	1.09057e-07	1.26196	442.961	559	0.210934	0.26619	5856	0.98155	1	1	0.917278	442.614	406	3157	0.14321	0.128603	region_10,region_100,region_1008,region_1009,region_1010,region_1011,region_1012,region_1013,region_1014,region_1015,region_1017,region_1018,region_1019,region_102,region_1025,region_1027,region_1028,region_1029,region_103,region_1030,region_1038,region_104,region_1040,region_1045,region_1046,region_105,region_107,region_1075,region_1076,region_1077,region_108,region_109,region_1095,region_11,reg…	1700071K01Rik,Abcc4,Abl2,Accn1,Acer2,Aco1,Acsl4,Actg1,Actn4,Acvr1,Adam9,Adcy1,Add3,Adm,Adnp,Adra2a,Adsl,Agl,Aim2,Akap1,Akt2,Aldh1a2,Aldh1a3,Aldh3a1,Angpt1,Angptl3,Ank3,Anxa2,Anxa3,Apbb2,Aqp3,Arg1,Asah1,Asns,Ass1,Atg5,Atoh1,Atp12a,Atp5g3,Axin2,B3gnt2,Bckdhb,Bcl2,Bdh1,Bdkrb2,Bmp7,Bmpr2,Boc,Brca1,Btg1,Cacybp,Calcoco2,Calm2,Car2,Casr,Cckar,Ccl2,Ccnd2,Cd83,Cd9,Cda,Cdh13,Cdh4,Cftr,Cga,Chrna7,Cited2,Clc…
GO Biological Process	GO:0007399	nervous system development	74	9.60487e-10	8.24386e-06	1.11403e-07	1.28754	383.677	494	0.182703	0.235238	5	4.00184e-34	3.43478e-30	6.86955e-31	1.86579	187.589	350	1338	0.123457	0.261584	region_100,region_1008,region_1009,region_1010,region_1011,region_1017,region_102,region_1027,region_1028,region_1030,region_1038,region_1045,region_1046,region_1050,region_1052,region_107,region_1070,region_1071,region_1072,region_1073,region_108,region_1084,region_1088,region_109,region_1093,region_110,region_1105,region_1106,region_1110,region_1111,region_1112,region_1113,region_1115,region_11…	2510003E04Rik,A930038C07Rik,Abi2,Abl2,Acsl4,Actg1,Adcy1,Adm,Adnp,Agtpbp1,Aldh1a2,Aldh1a3,Aldh5a1,Ank3,Anxa3,Apbb2,Atl1,Atoh1,Atoh7,B3gnt2,Bai2,Bbs4,Bcl2,Bdh1,Bmp7,Bmpr2,Boc,Bok,Brca1,Cacna1a,Cadm1,Camk1d,Caprin2,Ccdc88a,Cckar,Ccl2,Ccnd2,Cd9,Cdh2,Cdh23,Cdh4,Cdk6,Chd7,Cited2,Cln8,Cnga3,Cnr1,Cntf,Cntn2,Cntn4,Cobl,Coq7,Creb1,Ctnna1,Ctnnb1,Ctsl,Cttnbp2,Cux1,Cxcr4,Cyp19a1,Cyp26a1,D130043K22Rik,Dab1,Dbx…
GO Biological Process	GO:0010605	negative regulation of macromolecule metabolic process	75	1.90254e-09	1.63295e-05	2.17727e-07	1.39403	223.095	311	0.106235	0.148095	106	6.60153e-12	5.66609e-08	5.34537e-10	1.55981	136.556	213	974	0.0751323	0.218686	region_10,region_100,region_1008,region_1009,region_1010,region_1011,region_1012,region_1013,region_1014,region_1015,region_1016,region_1018,region_102,region_1020,region_1021,region_1039,region_1045,region_1046,region_1050,region_1059,region_1060,region_107,region_1070,region_108,region_1084,region_109,region_1093,region_11,region_110,region_1105,region_1106,region_111,region_1123,region_1125,re…	1700071K01Rik,Acer2,Adnp,Akap1,Akt2,Atf7ip,Atg5,Atxn1,Barx2,Bclaf1,Bcor,Bdkrb2,Bhlhe40,Bmp7,Bnip3l,Brca1,C1d,Caprin2,Cd276,Cd46,Cd59a,Cited2,Cryaa,Ctbp2,Ctnnb1,Cux1,Dab2,Dap,Dlx2,Dmbx1,Drosha,Dusp6,Ehmt1,Eif2c2,Eif4ebp1,Elk3,Enpp1,Ercc4,Ezh2,Fbp1,Fbxw11,Fbxw7,Fezf1,Fezf2,Fgfr1,Foxb1,Foxc1,Foxd1,Foxd2,Foxd3,Foxi1,Foxi3,Foxj3,Foxk1,Foxn2,Foxn3,Foxo1,Foxo6,Foxp1,Fst,Fzd1,Gata3,Gata6,Gclc,Glis3,Glis3…
GO Biological Process	GO:0045597	positive regulation of cell differentiation	76	1.98987e-09	1.70791e-05	2.24725e-07	1.54569	127.451	197	0.0606909	0.0938095	72	1.87129e-14	1.60613e-10	2.23074e-12	2.03033	56.6411	115	404	0.0405644	0.284654	region_100,region_1000,region_1001,region_1002,region_1008,region_1009,region_101,region_1010,region_1011,region_1028,region_103,region_104,region_1045,region_1046,region_1050,region_107,region_1076,region_1077,region_108,region_109,region_110,region_1111,region_1123,region_1137,region_1150,region_1151,region_1152,region_1155,region_1156,region_1163,region_1164,region_1215,region_1218,region_1219…	Acvr1,Adamts9,Adnp,Ap3b1,Atoh1,Axin2,Bambi,Bcl2,Bmp7,Bmpr2,Boc,Btg1,Caprin2,Car2,Cd276,Cd83,Cdh4,Cntf,Csf1,Ctnnb1,Cxcr4,Cyp26b1,Dab1,Eomes,Epb4.1l5,Etv5,Fezf1,Fgf18,Fgfr1,Foxp1,Gata3,Gata6,Gdf6,Gdnf,Ghr,Gnas,Hdac2,Hes1,Hif1a,Hlx,Id2,Id4,Ifng,Igfbp3,Il15,Il17a,Il4,Il7,Inpp5d,Irx3,Itgb3,Jag1,Jak2,Kdm1a,Kitl,Klf10,Lef1,Maml1,Mll5,Mtap1b,Nefl,Neurod1,Neurog1,Neurog3,Ngf,Nkx2-2,Nptn,Nrg1,Ntf3,Ntn1,Ntr…
GO Biological Process	GO:0009892	negative regulation of metabolic process	77	1.99795e-09	1.71484e-05	2.22706e-07	1.38113	235.315	325	0.112055	0.154762	105	6.48438e-12	5.56555e-08	5.30052e-10	1.5407	145.388	224	1037	0.0790123	0.216008	region_10,region_100,region_1008,region_1009,region_1010,region_1011,region_1012,region_1013,region_1014,region_1015,region_1016,region_1018,region_102,region_1020,region_1021,region_1039,region_1045,region_1046,region_1050,region_1059,region_1060,region_107,region_1070,region_108,region_1084,region_109,region_1093,region_11,region_110,region_1105,region_1106,region_111,region_1123,region_1125,re…	1700071K01Rik,Acer2,Adnp,Adra2a,Akap1,Akt2,Atf7ip,Atg5,Atxn1,Barx2,Bclaf1,Bcor,Bdkrb2,Bhlhe40,Bmp7,Bnip3l,Brca1,Btn2a2,C1d,Cacna1a,Caprin2,Cd276,Cd46,Cd59a,Cda,Cited2,Cnr1,Cryaa,Ctbp2,Ctnnb1,Cux1,Dab2,Dap,Dlx2,Dmbx1,Drosha,Dusp10,Dusp6,Ednra,Ehmt1,Eif2c2,Eif4ebp1,Elk3,Enpp1,Ercc4,Ezh2,Fbp1,Fbxw11,Fbxw7,Fezf1,Fezf2,Fgf15,Fgfr1,Foxb1,Foxc1,Foxd1,Foxd2,Foxd3,Foxi1,Foxi3,Foxj3,Foxk1,Foxn2,Foxn3,Foxo1…
GO Biological Process	GO:0051179	localization	78	3.35814e-09	2.88229e-05	3.69525e-07	1.21045	576.646	698	0.274593	0.332381	160	4.76185e-09	4.08709e-05	2.55443e-07	1.23594	452.288	559	3226	0.197178	0.17328	region_10,region_100,region_1018,region_102,region_1024,region_1028,region_103,region_1038,region_104,region_1041,region_1047,region_1048,region_1049,region_105,region_1050,region_1054,region_1055,region_1056,region_1057,region_106,region_1069,region_107,region_1071,region_1072,region_1073,region_1074,region_1078,region_108,region_1080,region_1084,region_1085,region_1086,region_1088,region_109,re…	1110021L09Rik,1190002N15Rik,2010107G12Rik,2510003E04Rik,4831426I19Rik,5430435G22Rik,A930038C07Rik,Aak1,Abca13,Abca4,Abcb5,Abcc2,Abcc4,Abcg8,Abi2,Abra,Accn1,Actn4,Acvr1,Adm,Ahctf1,Ahcyl1,Ahi1,Aim2,Akap10,Akap2,Akt2,Angpt1,Angptl3,Ank,Ank2,Ank3,Ano1,Ano4,Ano6,Anxa2,Anxa3,Ap3b1,Apba2,Apbb2,Aqp11,Aqp3,Arf1,Arfgap3,Arfip1,Arid5b,Arl4c,Armc1,Arntl,Atg10,Atg16l1,Atoh1,Atp10a,Atp10d,Atp11b,Atp12a,Atp1b3,…
GO Biological Process	GO:0043412	macromolecule modification	79	4.14738e-09	3.5597e-05	4.50594e-07	1.30702	323.637	423	0.154113	0.201429	210	1.16562e-07	0.00100045	4.76404e-06	1.30009	251.52	327	1794	0.115344	0.182274	region_0,region_1,region_1012,region_1013,region_1014,region_1015,region_1016,region_102,region_1035,region_1036,region_1039,region_1040,region_1042,region_1043,region_1044,region_105,region_1051,region_1060,region_1061,region_1062,region_1063,region_1065,region_107,region_1070,region_1071,region_1072,region_1073,region_108,region_1087,region_109,region_1095,region_110,region_1101,region_1107,reg…	1110034B05Rik,1700071K01Rik,4833442J19Rik,A930038C07Rik,Aak1,Abl2,Acvr1,Adam9,Adnp,Adra2a,Agtpbp1,Akt2,Alg6,Alkbh3,Anapc1,Anapc4,Arhgef10l,Arih1,Atf7ip,Atg10,Atg5,B230120H23Rik,B3galt1,B3gnt2,B3gnt7,B4galt1,Bard1,Bcl2,Bcor,Bmp2k,Bmp7,Bmpr2,Brca1,Btg1,Camk1d,Camk1g,Camk2d,Cand1,Cartpt,Ccnh,Cdc25b,Cdc7,Cdk13,Cdk15,Cdk17,Cdk20,Cdk6,Cdkal1,Cdkl1,Cdkl4,Cdyl,Clip3,Clock,Col3a1,Cops5,Creb1,Csnk1g3,Csnk2…
GO Biological Process	GO:0006464	protein modification process	80	6.21293e-09	5.33255e-05	6.66569e-07	1.30903	313.974	411	0.149511	0.195714	187	2.51222e-08	0.000215624	1.15307e-06	1.32612	239.042	317	1705	0.111817	0.185924	region_0,region_1,region_1012,region_1013,region_1014,region_1015,region_1016,region_102,region_1035,region_1036,region_1040,region_1042,region_1043,region_1044,region_105,region_1051,region_1060,region_1061,region_1062,region_1063,region_1065,region_107,region_1070,region_1071,region_1072,region_1073,region_108,region_1087,region_109,region_1095,region_110,region_1101,region_1110,region_1111,reg…	1700071K01Rik,4833442J19Rik,A930038C07Rik,Aak1,Abl2,Acvr1,Adam9,Adnp,Adra2a,Agtpbp1,Akt2,Alg6,Anapc1,Anapc4,Arhgef10l,Arih1,Atg10,Atg5,B230120H23Rik,B3galt1,B3gnt2,B3gnt7,B4galt1,Bard1,Bcl2,Bcor,Bmp2k,Bmp7,Bmpr2,Brca1,Btg1,Camk1d,Camk1g,Camk2d,Cand1,Cartpt,Ccnh,Cdc25b,Cdc7,Cdk13,Cdk15,Cdk17,Cdk20,Cdk6,Cdkl1,Cdkl4,Cdyl,Clip3,Clock,Col3a1,Cops5,Creb1,Csnk1g3,Csnk2a2,Cul3,D8Ertd82e,Dclk2,Ddr1,Dpm1,D…
GO Biological Process	GO:0022008	neurogenesis	81	1.19269e-08	0.000102369	1.26381e-06	1.33121	271.182	361	0.129135	0.171905	12	1.17865e-26	1.01163e-22	8.43027e-24	1.95481	123.797	242	883	0.0853615	0.274066	region_100,region_1008,region_1009,region_1010,region_1011,region_1017,region_102,region_1027,region_1028,region_1030,region_1045,region_1046,region_1050,region_1052,region_107,region_1071,region_1072,region_1073,region_108,region_1088,region_109,region_110,region_1105,region_1106,region_1110,region_1112,region_1113,region_1115,region_1116,region_1117,region_1118,region_1119,region_1123,region_11…	A930038C07Rik,Abi2,Abl2,Acsl4,Actg1,Adcy1,Adm,Adnp,Agtpbp1,Aldh1a2,Ank3,Apbb2,Atl1,Atoh1,B3gnt2,Bbs4,Bcl2,Bmp7,Boc,Bok,Cacna1a,Camk1d,Caprin2,Ccdc88a,Cckar,Ccl2,Ccnd2,Cd9,Cdh2,Cdh23,Cdh4,Cdk6,Cln8,Cnga3,Cnr1,Cntf,Cntn2,Cntn4,Coq7,Creb1,Ctnna1,Ctnnb1,Cux1,Cxcr4,D130043K22Rik,Dab1,Dbx1,Dgkg,Dlx2,Dner,Dscaml1,Dtnbp1,Edn3,Egr2,Emx1,En2,Enah,Eomes,Epha2,Epha4,Epha7,Esr2,Etv1,Etv5,Evl,Evx1,Exoc4,Ext1,E…
GO Biological Process	GO:0031328	positive regulation of cellular biosynthetic process	82	1.57088e-08	0.000134828	1.64425e-06	1.34061	255.107	342	0.12148	0.162857	57	6.62017e-16	5.6821e-12	9.96859e-14	1.64387	145.388	239	1037	0.0843033	0.230472	region_100,region_1007,region_1008,region_1009,region_1010,region_1011,region_1025,region_1028,region_1029,region_1039,region_1045,region_1046,region_1050,region_1053,region_1065,region_107,region_1070,region_1071,region_1072,region_1073,region_1076,region_1077,region_108,region_109,region_1090,region_1093,region_110,region_1101,region_1105,region_1106,region_1110,region_1114,region_1116,region_1…	1700071K01Rik,Abra,Acvr1,Adnp,Aff1,Ahctf1,Akt2,Arntl,Atf7ip,Atoh1,Atxn1,Bambi,Barx2,Bhlha15,Bhlhe23,Bmp3,Bmp7,Brca1,Cacybp,Cand1,Caprin2,Ccnh,Cd276,Cd28,Cited2,Clock,Cops5,Creb1,Creb3l2,Csrnp1,Ctnnb1,Dab2,Ddx58,Dlx2,Dyrk2,E2f3,Ebf1,Egr2,Ehf,En2,Eomes,Epas1,Esrrb,Esrrg,Etv1,Etv5,Evx1,Eya1,Fbxw11,Fezf1,Fezf2,Fgf1,Fgf23,Fgf9,Foxc1,Foxd1,Foxd2,Foxd3,Foxi1,Foxj3,Foxk1,Foxo1,Foxo6,Foxp1,Fzd1,Fzd7,Gata3…
GO Biological Process	GO:0065009	regulation of molecular function	83	1.64477e-08	0.000141171	1.70085e-06	1.29391	323.825	419	0.154202	0.199524	98	1.84037e-12	1.57959e-08	1.61183e-10	1.44713	213.526	309	1523	0.108995	0.202889	region_1008,region_1009,region_101,region_1010,region_1011,region_102,region_1020,region_1022,region_1027,region_1029,region_103,region_1030,region_1035,region_1036,region_104,region_105,region_1050,region_1053,region_1066,region_1067,region_1075,region_1119,region_1131,region_1144,region_1150,region_1151,region_1152,region_1155,region_1156,region_1159,region_1165,region_118,region_1183,region_11…	4930447C04Rik,Abl2,Abra,Acap2,Adam9,Adcy1,Adcy3,Adcy5,Adcyap1,Adnp,Adra2a,Adrb3,Agfg2,Ahcyl1,Akt2,Angpt1,Angptl3,Anxa2,Anxa3,Arfgap3,Arhgap10,Arhgap15,Arhgap18,Arhgap21,Arhgap24,Arhgap25,Arhgap26,Arhgap28,Arhgap29,Arhgap32,Arhgap42,Arhgap5,Arhgef19,Arid5b,Asap1,Axin2,B230120H23Rik,Bambi,Bcl2,Bmp7,Bok,Btg1,Cacna1a,Cacna1b,Cacna1e,Cacna2d1,Cacna2d3,Cacng3,Cacng5,Calcr,Cald1,Camk1d,Cand1,Caprin2,Car…
GO Biological Process	GO:0048583	regulation of response to stimulus	84	1.81026e-08	0.000155374	1.8497e-06	1.26716	374.855	475	0.178503	0.22619	54	1.65808e-16	1.42313e-12	2.63542e-14	1.50296	232.874	350	1661	0.123457	0.210716	region_10,region_100,region_102,region_1020,region_1025,region_1027,region_1029,region_103,region_1031,region_1035,region_1036,region_1038,region_104,region_105,region_1050,region_1053,region_1065,region_1066,region_1067,region_1069,region_107,region_1071,region_1072,region_1073,region_1076,region_1077,region_108,region_1084,region_109,region_1095,region_11,region_110,region_1111,region_1114,regi…	1700071K01Rik,4930474N05Rik,Aak1,Abra,Acap2,Acvr1,Adcyap1,Adra2a,Adrb3,Agfg2,Akap11,Akap7,Akt2,Angpt1,Anxa2,Aoah,Arfgap3,Arhgap10,Arhgap15,Arhgef10,Arhgef10l,Arhgef19,Arhgef26,Arhgef3,Asap1,Atxn1,Axin2,B230120H23Rik,BC096441,Bambi,Bcl2,Becn1,Bmp7,Bmper,Bmpr2,Brca1,C8b,Cacna1e,Cacng3,Cacng5,Cadm1,Camk1d,Caprin2,Cartpt,Ccl2,Cd276,Cd28,Cd46,Cd47,Cd59a,Cd86,Cdh13,Cdh2,Chn2,Chordc1,Chrna7,Cited2,Clec2…
GO Biological Process	GO:0009891	positive regulation of biosynthetic process	85	2.16383e-08	0.000185721	2.18496e-06	1.33568	256.799	343	0.122285	0.163333	59	9.2315e-16	7.9234e-12	1.34295e-13	1.63555	147.351	241	1051	0.0850088	0.229305	region_100,region_1007,region_1008,region_1009,region_1010,region_1011,region_1025,region_1028,region_1029,region_1039,region_1045,region_1046,region_1050,region_1053,region_1065,region_107,region_1070,region_1071,region_1072,region_1073,region_1076,region_1077,region_108,region_109,region_1090,region_1093,region_110,region_1101,region_1105,region_1106,region_1110,region_1114,region_1116,region_1…	1700071K01Rik,Abra,Acvr1,Adnp,Aff1,Ahctf1,Akt2,Arntl,Atf7ip,Atoh1,Atxn1,Bambi,Barx2,Bhlha15,Bhlhe23,Bmp3,Bmp7,Brca1,Cacybp,Cand1,Caprin2,Ccl2,Ccnh,Cd276,Cd28,Cited2,Clock,Cops5,Creb1,Creb3l2,Csrnp1,Ctgf,Ctnnb1,Dab2,Ddx58,Dlx2,Dyrk2,E2f3,Ebf1,Egr2,Ehf,En2,Eomes,Epas1,Esrrb,Esrrg,Etv1,Etv5,Evx1,Eya1,Fbxw11,Fezf1,Fezf2,Fgf1,Fgf23,Fgf9,Foxc1,Foxd1,Foxd2,Foxd3,Foxi1,Foxj3,Foxk1,Foxo1,Foxo6,Foxp1,Fzd1,…
GO Biological Process	GO:0044085	cellular component biogenesis	86	3.02748e-08	0.000259849	3.0215e-06	1.42711	167.472	239	0.0797484	0.113809	598	0.00114548	1	0.0164409	1.24015	142.724	177	1018	0.0624339	0.17387	region_1008,region_1009,region_101,region_1010,region_1011,region_1016,region_1027,region_1028,region_1037,region_1052,region_1058,region_1059,region_107,region_108,region_1085,region_1086,region_109,region_110,region_1111,region_1125,region_113,region_1132,region_1137,region_115,region_1150,region_1151,region_1152,region_116,region_1168,region_1180,region_1181,region_1182,region_1184,region_120,…	Abl2,Actg1,Actn4,Adsl,Ahctf1,Angpt1,Aqp11,Arg1,Arhgap10,Arhgap26,Arhgap42,Asap1,Atg16l1,Atg5,Atl1,Atl2,Baiap2l1,Bbs10,Bbs4,Bcl2,Becn1,C1d,C1qtnf1,Cabyr,Cacna1a,Cadm1,Cadps,Cald1,Ccdc88a,Cd9,Cda,Cdh13,Cdh2,Celf4,Chaf1b,Chn2,Clip3,Cox10,Cryaa,Cryz,Ctnna1,Ctnnb1,Cul3,Ddx47,Dis3,Dpys,Drosha,Dst,Dync2li1,Ebna1bp2,Elp2,Enah,Evl,Exoc4,Fbll1,Fbln5,Fbp1,Fgd4,Fhad1,Foxp1,Gja10,Gm4906,H2afb1,H2afy2,H2afz,He…
GO Biological Process	GO:0065008	regulation of biological quality	87	3.06085e-08	0.000262713	3.01969e-06	1.28593	327.39	421	0.1559	0.200476	104	6.48066e-12	5.56235e-08	5.34841e-10	1.4178	229.228	325	1635	0.114638	0.198777	region_100,region_101,region_1018,region_102,region_1021,region_1027,region_1028,region_1029,region_1038,region_1053,region_1058,region_1059,region_107,region_1070,region_1074,region_1078,region_108,region_109,region_110,region_111,region_1111,region_1117,region_1118,region_1127,region_1128,region_1129,region_1130,region_1150,region_1151,region_1152,region_1153,region_1163,region_1164,region_1166…	2810407C02Rik,4831426I19Rik,Aak1,Abcb5,Abcg8,Accn1,Aco1,Adm,Adnp,Adra2a,Adrb3,Agtpbp1,Akap2,Akr1d1,Aldh1a2,Aldh1a3,Aldh5a1,Aldh8a1,Angpt1,Angptl3,Anxa2,Ap3b1,Apbb2,Aqp11,Aqp3,Arf1,Arhgap15,Arhgap5,Atg5,Atp12a,Atp6v0c,Atxn1,Baiap2l1,Bambi,Bbs10,Bbs4,Bcl2,Bcl2l11,Bdkrb2,Bhlha15,Bhlhe40,Bmpr2,Bpgm,Brwd1,Bub3,Cacna1a,Cacna1b,Cacna1e,Cadps,Calcr,Cartpt,Cckar,Ccl2,Cd9,Cdc42ep3,Cdh23,Cdh4,Cftr,Cga,Chrna…
GO Biological Process	GO:0035239	tube morphogenesis	88	5.67721e-08	0.000487275	5.53721e-06	1.58609	92.6809	147	0.0441337	0.07	41	4.46713e-18	3.83413e-14	9.35154e-16	2.49374	37.2934	93	266	0.0328042	0.349624	region_107,region_1071,region_1072,region_1073,region_1074,region_108,region_109,region_110,region_1141,region_1150,region_1151,region_1152,region_1163,region_1164,region_1194,region_12,region_1205,region_1206,region_1207,region_1212,region_1213,region_1255,region_1256,region_1282,region_1300,region_1314,region_1316,region_1317,region_1318,region_1331,region_1332,region_134,region_1349,region_136…	Acvr1,Adm,Aldh1a2,Angpt1,B4galt1,Bbs4,Bcl2,Bcl2l11,Bmp7,Chd7,Cited2,Cobl,Coq7,Csf1,Ctnnb1,Cxcr4,Ddr1,Dlg1,Ednra,Enah,Epha2,Eya1,Fgf3,Foxd1,Foxd2,Foxd3,Fzd6,Gata3,Gata6,Gbx2,Gdnf,Hectd1,Hes1,Hif1a,Hnf1b,Hs2st1,Irx1,Irx3,Kif26b,Lama1,Lef1,Lgr4,Lmo4,Map3k7,Mtss1,Myc,Mycn,Ncoa3,Nog,Nrp1,Ntn1,Opa1,Osr1,Pax8,Pbx1,Pbx3,Pdpn,Pgr,Pitx2,Podxl,Prkx,Rdh10,Rgma,Robo1,Sall1,Setd2,Sfrp1,Sfrp2,Shh,Shroom3,Smad3,…
GO Biological Process	GO:0010033	response to organic substance	89	6.3744e-08	0.000547115	6.14736e-06	1.31166	272.936	358	0.12997	0.170476	201	6.01753e-08	0.000516484	2.56957e-06	1.36265	187.869	256	1340	0.0902998	0.191045	region_10,region_1017,region_1019,region_102,region_1029,region_103,region_1030,region_1038,region_104,region_1045,region_1046,region_107,region_1076,region_1077,region_108,region_109,region_1095,region_11,region_110,region_1101,region_1111,region_1117,region_1118,region_1124,region_1142,region_1147,region_1148,region_1150,region_1151,region_1152,region_1154,region_1155,region_1156,region_1170,re…	1700071K01Rik,Acsl4,Acvr1,Adam9,Adm,Adnp,Adra2a,Agl,Aim2,Akap1,Akt2,Aldh1a2,Aldh3a1,Angpt1,Angptl3,Anxa3,Arg1,Asah1,Asns,Ass1,Atp12a,Atp5g3,Axin2,Bckdhb,Bcl2,Bdh1,Bmp7,Bmpr2,Brca1,Btg1,Cacybp,Calcoco2,Car2,Cckar,Ccl2,Ccnd2,Cd83,Cda,Cdh13,Cftr,Cga,Chrna7,Cited2,Cmpk2,Cnr1,Cntf,Col3a1,Col6a3,Creb1,Creb3l2,Ctgf,Ctnna1,Ctnnb1,Ctsl,Cyp19a1,Cyp1b1,Cyp2c44,Cyp7b1,Dab2ip,Ddc,Defb1,Drosha,Dusp10,Dusp4,Dus…
GO Biological Process	GO:0040012	regulation of locomotion	90	6.82721e-08	0.00058598	6.51089e-06	1.56467	97.784	153	0.0465638	0.0728571	68	7.26598e-15	6.23639e-11	9.17116e-13	2.16987	46.5467	101	332	0.0356261	0.304217	region_100,region_101,region_102,region_107,region_108,region_109,region_110,region_1111,region_1150,region_1151,region_1152,region_1155,region_1156,region_1163,region_1164,region_1218,region_1219,region_1223,region_1250,region_1272,region_1282,region_1299,region_1300,region_1305,region_1306,region_1314,region_1316,region_1317,region_1318,region_134,region_1343,region_1344,region_1345,region_1349…	Adam9,Adra2a,Akt2,Angpt1,Angptl3,Anxa3,Arhgap5,Bbs4,Bcl2,Bmper,Bmpr2,Brca1,Camk1d,Ccl2,Cdh13,Chrm1,Cited2,Csf1,Cxcr4,Edn2,Edn3,Ednra,Efnb2,Epb4.1l5,Epha2,F3,Fert2,Fgf1,Fgr,Gata3,Hif1a,Hs3st5,Igf1r,Itgb3,Jak2,Lama1,Lama4,Lamb1,Lef1,Lrrk2,Mkks,Muc2,Nf1,Nog,Nr2e1,Nrp1,Ntn1,Onecut1,Pax6,Pdgfra,Pdpn,Pik3r1,Pitx2,Pla2g7,Plau,Plcb1,Pld1,Plxna4,Podxl,Ppap2b,Prkca,Prkx,Prox1,Pten,Ptk2b,Rap2a,Rap2b,Rapgef4…
GO Biological Process	GO:0042127	regulation of cell proliferation	91	7.08206e-08	0.000607853	6.67971e-06	1.34495	229.004	308	0.10905	0.146667	83	7.88573e-14	6.76832e-10	8.1546e-12	1.64354	125.34	206	894	0.0726631	0.230425	region_100,region_1007,region_1008,region_1009,region_101,region_1010,region_1011,region_102,region_1025,region_1026,region_1027,region_103,region_1030,region_104,region_1040,region_1042,region_1043,region_1044,region_107,region_1071,region_1072,region_1073,region_108,region_109,region_1093,region_110,region_1110,region_1111,region_1114,region_1119,region_1124,region_1137,region_1150,region_1151,…	1700071K01Rik,Acer2,Adm,Aldh1a2,Aldh3a1,Angpt1,Arg1,Arhgap5,Axin2,B4galt1,BC096441,Bambi,Bcl2,Bdkrb2,Becn1,Bmp7,Bmpr2,Btg1,Btn2a2,Ccdc88a,Ccl2,Ccnd2,Cd276,Cd28,Cd47,Cd80,Cd9,Cdc7,Cdca7l,Cdh13,Cdk6,Cntf,Csf1,Ctgf,Ctla4,Ctnna1,Ctnnb1,Cyp7b1,Dab2ip,Ddr1,Dlg1,E2f3,Edn2,Edn3,Ednra,Egln3,Eif2ak2,Epcam,Esr2,Etv5,Eya1,Ezh2,F3,Fancl,Fbxw7,Fezf1,Fezf2,Fgf1,Fgf15,Fgf18,Fgf3,Fgf9,Fgfr1,Foxo1,Foxo6,Foxp1,Fto,…
GO Biological Process	GO:0009888	tissue development	92	1.298e-07	0.00111408	1.21095e-05	1.31222	260.627	342	0.124108	0.162857	26	3.62196e-20	3.10873e-16	1.19567e-17	1.76848	136.275	241	972	0.0850088	0.247942	region_100,region_1008,region_1009,region_1010,region_1011,region_102,region_1023,region_1025,region_1028,region_103,region_104,region_1045,region_1046,region_107,region_1071,region_1072,region_1073,region_1074,region_1076,region_1077,region_108,region_109,region_1093,region_1095,region_110,region_1105,region_1106,region_1110,region_1111,region_1115,region_1122,region_1133,region_1141,region_1150…	Acvr1,Adam9,Adm,Aldh1a2,Aldh1a3,Angpt1,Arid5b,Atg5,Axin2,B4galt1,Barx2,Bbs4,Bcl2,Bdh1,Bmp3,Bmp7,Bmpr2,Cacybp,Car2,Cited2,Cobl,Col3a1,Coq7,Creb3l2,Crygs,Csf1,Cst10,Ctnnb1,Ctsl,Cxcr4,Cyp26a1,Cyp7b1,Ddr1,Dlg1,Dlx2,Dner,Dsp,Dusp4,Edn3,Ednra,Ehf,Elf5,Enah,Enpp1,Eomes,Epb4.1l5,Epha2,Esr2,Ext1,Eya1,Eya2,F11r,Fgf1,Fgf15,Fgf18,Fgf9,Fgfr1,Foxb1,Foxc1,Foxd1,Foxd2,Foxd3,Foxi1,Foxi3,Foxj3,Foxk1,Foxn2,Foxn3,Fo…
GO Biological Process	GO:0035295	tube development	93	1.41367e-07	0.00121335	1.30468e-05	1.45508	136.075	198	0.0647976	0.0942857	28	9.11416e-20	7.82268e-16	2.79381e-17	2.24775	56.5009	127	403	0.0447972	0.315136	region_1008,region_1009,region_1010,region_1011,region_107,region_1071,region_1072,region_1073,region_1074,region_1079,region_108,region_109,region_1093,region_110,region_1111,region_1141,region_1150,region_1151,region_1152,region_1163,region_1164,region_1194,region_12,region_1205,region_1206,region_1207,region_1212,region_1213,region_1223,region_1255,region_1256,region_1282,region_1300,region_13…	Aard,Acvr1,Adm,Aldh1a2,Angpt1,Arg1,Asah1,B4galt1,Bbs4,Bcl2,Bcl2l11,Bmp7,Bmper,Bmpr2,Cftr,Chd7,Cited2,Cobl,Coq7,Csf1,Ctgf,Ctnnb1,Cux1,Cxcr4,Ddr1,Dlg1,Ednra,Enah,Epas1,Epcam,Epha2,Eya1,Fgf1,Fgf18,Fgf3,Fgf9,Fgfr1,Foxc1,Foxd1,Foxd2,Foxd3,Foxp1,Fzd1,Fzd6,Gata3,Gata6,Gbx2,Gdnf,Gsta3,Hectd1,Hes1,Hif1a,Hnf1b,Hs2st1,Insc,Irx1,Irx3,Jag1,Kif26b,Lama1,Lef1,Lgr4,Lmo4,Lta4h,Man2a1,Map3k7,Mtss1,Myc,Mycn,Ncoa3,N…
GO Biological Process	GO:0031324	negative regulation of cellular metabolic process	94	1.88816e-07	0.00162061	1.72405e-05	1.33884	221.834	297	0.105635	0.141429	126	1.25653e-10	1.07848e-06	8.55933e-09	1.52842	133.471	204	952	0.0719577	0.214286	region_10,region_100,region_1008,region_1009,region_1010,region_1011,region_1012,region_1013,region_1014,region_1015,region_1016,region_1018,region_102,region_1020,region_1021,region_1039,region_1045,region_1046,region_1050,region_1059,region_1060,region_107,region_1070,region_108,region_1084,region_109,region_1093,region_11,region_110,region_1105,region_1106,region_1123,region_1125,region_1137,r…	1700071K01Rik,Acer2,Adra2a,Akap1,Akt2,Atf7ip,Atg5,Atxn1,Barx2,Bclaf1,Bcor,Bdkrb2,Bhlhe40,Bmp7,Brca1,Btn2a2,C1d,Cacna1a,Caprin2,Cd276,Cda,Cited2,Cnr1,Ctbp2,Ctnnb1,Cux1,Dab2,Dap,Dlx2,Dmbx1,Dusp6,Ednra,Ehmt1,Eif2c2,Eif4ebp1,Elk3,Enpp1,Ercc4,Ezh2,Fbp1,Fbxw11,Fbxw7,Fezf1,Fezf2,Fgf15,Fgfr1,Foxb1,Foxc1,Foxd1,Foxd2,Foxd3,Foxi1,Foxi3,Foxj3,Foxk1,Foxn2,Foxn3,Foxo1,Foxo6,Foxp1,Fst,Fzd1,Gata3,Gata6,Gclc,Glis…
GO Biological Process	GO:0030097	hemopoiesis	95	1.89193e-07	0.00162384	1.70931e-05	1.60726	80.261	129	0.0382195	0.0614286	113	3.89748e-11	3.34521e-07	2.96036e-09	1.97651	46.5467	92	332	0.0324515	0.277108	region_100,region_1007,region_1008,region_1009,region_1010,region_1011,region_1053,region_1110,region_1114,region_1119,region_1123,region_1150,region_1151,region_1152,region_1194,region_1210,region_1218,region_1219,region_1230,region_1231,region_1251,region_1282,region_1298,region_1300,region_1316,region_1317,region_1318,region_1322,region_134,region_1349,region_1368,region_138,region_1415,region…	5830411N06Rik,Ahctf1,Angpt1,Bcl2,Bpgm,Calcr,Cd28,Cdk13,Cdk6,Chd7,Cited2,Csf1,Ctnnb1,Cyp19a1,Dock2,Eomes,Epas1,Epha2,Foxp1,Fst,Fzd5,Fzd7,Fzd9,Gadd45g,Gata3,Glrx5,Hdac9,Hif1a,Id2,Ifng,Il15,Il7,Jak2,Kdm1a,Kit,Lef1,Mb,Mecom,Mitf,Mll5,Msh2,Myo1e,Ncor1,Onecut1,Ostm1,Pax1,Pbx1,Pbx3,Picalm,Pik3r1,Plcb1,Plcg2,Plscr1,Prkx,Ptpn22,Rag1,Rbpj,Rcor1,Rpa1,Rtkn2,Satb1,Sfrp1,Sfrp2,Sfxn1,Shh,Sox4,Sox6,Stk3,Sykb,Tce…
GO Biological Process	GO:0048534	hemopoietic or lymphoid organ development	96	1.89387e-07	0.00162551	1.69324e-05	1.56693	90.6232	142	0.0431539	0.067619	134	5.26711e-10	4.52076e-06	3.3737e-08	1.85487	52.2949	97	373	0.0342152	0.260054	region_100,region_1007,region_1008,region_1009,region_1010,region_1011,region_1053,region_1110,region_1114,region_1119,region_1123,region_1150,region_1151,region_1152,region_1194,region_1210,region_1218,region_1219,region_1230,region_1231,region_1251,region_1282,region_1298,region_1300,region_1316,region_1317,region_1318,region_1322,region_1331,region_1332,region_134,region_1349,region_1368,regio…	5830411N06Rik,Ahctf1,Angpt1,Bcl2,Bcl2l11,Bpgm,Calcr,Cd28,Cdk13,Cdk6,Chd7,Cited2,Csf1,Ctnnb1,Cyp19a1,Dock2,Eomes,Epas1,Epha2,Fgf3,Foxp1,Fst,Fzd5,Fzd7,Fzd9,Gadd45g,Gata3,Glrx5,Hdac9,Hes1,Hif1a,Id2,Ifng,Il15,Il7,Jak2,Jarid2,Kdm1a,Kit,Lef1,Lmo4,Mb,Mecom,Mitf,Mll5,Msh2,Myo1e,Ncor1,Onecut1,Ostm1,Pax1,Pbx1,Pbx3,Picalm,Pik3r1,Plcb1,Plcg2,Plscr1,Prkx,Ptpn22,Rag1,Rbpj,Rcor1,Rpa1,Rtkn2,Satb1,Sfrp1,Sfrp2,Sfx…
GO Biological Process	GO:0009790	embryo development	97	1.93156e-07	0.00165786	1.70913e-05	1.34497	214.874	289	0.102321	0.137619	69	7.94381e-15	6.81817e-11	9.8814e-13	1.68909	119.591	202	853	0.0712522	0.236811	region_100,region_1008,region_1009,region_1010,region_1011,region_1025,region_103,region_1038,region_104,region_1045,region_1046,region_107,region_1071,region_1072,region_1073,region_1074,region_108,region_1084,region_1089,region_109,region_110,region_1105,region_1106,region_1110,region_1111,region_1119,region_1132,region_1141,region_1155,region_1156,region_1189,region_1194,region_12,region_1212,…	AK053790,Acsl4,Acvr1,Adm,Aff3,Aldh1a2,Aldh1a3,Angpt1,Apba2,Arfrp1,Atoh1,Axin2,Bbs4,Bcl2l11,Bmp7,Bmpr2,Brca1,Cdh23,Chd7,Cited2,Cobl,Col4a3bp,Coq7,Cryaa,Ctnnb1,Cul3,Cyp26b1,Dab2,Dlg1,Dlx2,Dppa3,Dscaml1,Dusp4,Ednra,Ehmt1,Enah,Eomes,Epas1,Epb4.1l5,Epha2,Esrrb,Etl4,Evx1,Ext1,Eya1,Fgf3,Fgf9,Fgfr1,Foxb1,Foxc1,Foxd1,Foxd2,Foxd3,Foxi1,Foxi3,Foxj3,Foxk1,Foxn2,Foxn3,Foxo1,Foxo6,Foxp1,Fzd5,Fzd6,Fzd7,Fzd9,Gat…
GO Biological Process	GO:0009966	regulation of signal transduction	98	2.79143e-07	0.00239588	2.44478e-05	1.27206	311.307	396	0.148241	0.188571	51	4.72748e-17	4.0576e-13	7.95608e-15	1.5899	182.401	290	1301	0.102293	0.222906	region_10,region_102,region_1020,region_1025,region_1027,region_1029,region_103,region_1035,region_1036,region_1038,region_104,region_105,region_1050,region_1053,region_1065,region_1066,region_1067,region_1069,region_107,region_1071,region_1072,region_1073,region_1076,region_1077,region_108,region_1084,region_109,region_11,region_110,region_1111,region_1124,region_1131,region_1132,region_1137,reg…	1700071K01Rik,4930474N05Rik,Aak1,Abra,Acap2,Acvr1,Adcyap1,Adra2a,Adrb3,Agfg2,Akap11,Akap7,Akt2,Angpt1,Arfgap3,Arhgap10,Arhgap15,Arhgef10,Arhgef10l,Arhgef19,Arhgef26,Arhgef3,Asap1,Atxn1,Axin2,B230120H23Rik,Bambi,Bmp7,Bmper,Bmpr2,Cacng3,Cacng5,Caprin2,Cd59a,Cdh13,Cdh2,Chn2,Cited2,Cntf,Cntn2,Cops5,Crhr2,Csf1,Ctnna1,Ctnnb1,Cul3,Cxxc4,Cyp7b1,Dab1,Dab2,Dab2ip,Ddit4l,Dgki,Dkk2,Dnmbp,Dock2,Dock4,Dtnbp1,D…
GO Biological Process	GO:0042063	gliogenesis	99	2.83016e-07	0.00242913	2.45367e-05	1.91836	37.532	72	0.0178724	0.0342857	204	9.10755e-08	0.000781701	3.83187e-06	2.37754	16.4035	39	117	0.0137566	0.333333	region_1027,region_1028,region_1045,region_1046,region_107,region_108,region_109,region_110,region_1133,region_1144,region_1150,region_1151,region_1152,region_1168,region_1353,region_1425,region_1426,region_1466,region_1467,region_1504,region_1505,region_1528,region_1551,region_1557,region_1558,region_166,region_1680,region_1681,region_1682,region_1692,region_1702,region_1711,region_1712,region_1…	Bcl2,Bok,Ccl2,Cd9,Cdk6,Cntf,Cntn2,Ctnnb1,Dner,Egr2,Exoc4,Foxd1,Foxd2,Foxd3,Gap43,Id2,Id4,Nf1,Nfib,Nkx2-2,Nr2e1,Nrg1,Ntf3,Pax6,Pdgfra,Phox2b,Pou3f1,Ptk2b,Rtn4,Shh,Sod1,Sox11,Sox4,Sox5,Sox6,Sox9,Tcf7l2,Vcan,Vim
GO Biological Process	GO:0002520	immune system development	100	3.57005e-07	0.00306418	3.06418e-05	1.5435	93.2944	144	0.0444259	0.0685714	155	2.55021e-09	2.18884e-05	1.41216e-07	1.79221	55.2391	99	394	0.0349206	0.251269	region_100,region_1007,region_1008,region_1009,region_1010,region_1011,region_1053,region_1110,region_1114,region_1119,region_1123,region_1150,region_1151,region_1152,region_1194,region_1210,region_1218,region_1219,region_1230,region_1231,region_1251,region_1282,region_1298,region_1300,region_1316,region_1317,region_1318,region_1322,region_1331,region_1332,region_134,region_1349,region_1368,regio…	5830411N06Rik,Ahctf1,Angpt1,Bcl2,Bcl2l11,Bpgm,Calcr,Cd28,Cdk13,Cdk6,Chd7,Cited2,Csf1,Ctnnb1,Cyp19a1,Dock2,Eomes,Epas1,Epha2,Fgf3,Foxp1,Fst,Fzd5,Fzd7,Fzd9,Gadd45g,Gata3,Glrx5,Hdac9,Hes1,Hif1a,Id2,Ifng,Il15,Il7,Jak2,Jarid2,Kdm1a,Kit,Lef1,Lmo4,Mb,Mecom,Mitf,Mll5,Msh2,Msh6,Myo1e,Ncor1,Onecut1,Ostm1,Pax1,Pbx1,Pbx3,Picalm,Pik3r1,Plcb1,Plcg2,Plscr1,Prkx,Ptpn22,Rag1,Rbpj,Rcor1,Rpa1,Rtkn2,Satb1,Sfrp1,Sfrp…
GO Biological Process	GO:0051270	regulation of cellular component movement	101	3.70633e-07	0.00318115	3.14965e-05	1.54512	92.5495	143	0.0440712	0.0680952	84	9.18276e-14	7.88156e-10	9.38281e-12	2.12881	45.5652	97	325	0.0342152	0.298461	region_100,region_101,region_102,region_107,region_108,region_109,region_110,region_1111,region_1150,region_1151,region_1152,region_1155,region_1156,region_1163,region_1164,region_1218,region_1219,region_1223,region_1250,region_1272,region_1282,region_1299,region_1300,region_1305,region_1306,region_1314,region_1316,region_1317,region_1318,region_134,region_1343,region_1344,region_1345,region_1349…	Actn4,Adam9,Adra2a,Akt2,Angpt1,Angptl3,Anxa3,Arhgap5,B4galt1,Bbs4,Bcl2,Bmper,Bmpr2,Brca1,Camk1d,Ccl2,Cdh13,Cited2,Csf1,Cxcr4,Edn2,Edn3,Ednra,Epb4.1l5,Epha2,F3,Fert2,Fgf1,Fgr,Gata3,Hif1a,Igf1r,Itgb3,Jak2,Lama1,Lama4,Lamb1,Lef1,Mkks,Muc2,Nf1,Nog,Nr2e1,Nrp1,Ntn1,Onecut1,Pax6,Pdgfra,Pdpn,Pik3r1,Pitx2,Pla2g7,Plau,Plcb1,Pld1,Plxna4,Podxl,Ppap2b,Prkca,Prkx,Prox1,Pten,Ptk2b,Rap2a,Rap2b,Rapgef4,Rhoc,Ror2,…
GO Biological Process	GO:0060429	epithelium development	102	3.71659e-07	0.00318995	3.1274e-05	1.42544	143.114	204	0.0681496	0.0971429	49	2.14248e-17	1.83889e-13	3.75284e-15	2.03999	68.1376	139	486	0.04903	0.286008	region_100,region_107,region_1071,region_1072,region_1073,region_1074,region_108,region_109,region_1093,region_110,region_1110,region_1141,region_1150,region_1151,region_1152,region_1153,region_1155,region_1156,region_1163,region_1164,region_1194,region_1199,region_12,region_1205,region_1206,region_1207,region_1212,region_1213,region_1223,region_1240,region_1244,region_1251,region_1255,region_125…	Acvr1,Adam9,Adm,Aldh1a2,Aldh1a3,Angpt1,B4galt1,Bbs4,Bcl2,Bmp7,Car2,Cited2,Cobl,Coq7,Crygs,Csf1,Ctnnb1,Cxcr4,Cyp7b1,Ddr1,Dlg1,Dsp,Ednra,Ehf,Elf5,Enah,Epb4.1l5,Epha2,Esr2,Eya1,F11r,Fgfr1,Foxb1,Foxd1,Foxd2,Foxd3,Fras1,Frem2,Fzd1,Fzd6,Fzd7,Gata3,Gata5,Gata6,Gbx2,Gdnf,Hectd1,Hes1,Hif1a,Hnf1b,Hoxb13,Hs2st1,Hydin,Id2,Id3,Igf1r,Insc,Irx1,Irx3,Jag1,Jak2,Kcne1,Kif26b,Lama1,Lef1,Lgr4,Lmo4,Lta4h,Map3k7,Mecom…
GO Biological Process	GO:0048598	embryonic morphogenesis	103	4.19486e-07	0.00360045	3.49558e-05	1.43626	135.769	195	0.0646519	0.0928571	53	1.26261e-16	1.0837e-12	2.04471e-14	2.04231	64.6326	132	461	0.0465609	0.286334	region_100,region_1025,region_107,region_1071,region_1072,region_1073,region_1074,region_108,region_1084,region_1089,region_109,region_110,region_1105,region_1106,region_1111,region_1132,region_1141,region_1155,region_1156,region_1189,region_1194,region_12,region_1212,region_1213,region_1215,region_1218,region_1219,region_1223,region_1251,region_1255,region_1256,region_1271,region_1282,region_128…	AK053790,Acvr1,Adm,Aff3,Aldh1a2,Aldh1a3,Arfrp1,Atoh1,Bbs4,Bmp7,Bmpr2,Cdh23,Chd7,Cited2,Cobl,Coq7,Cryaa,Ctnnb1,Cul3,Cyp26b1,Dlg1,Dlx2,Dscaml1,Dusp4,Enah,Eomes,Epb4.1l5,Epha2,Esrrb,Ext1,Eya1,Fgf3,Fgf9,Fgfr1,Foxc1,Foxi1,Foxi3,Fzd6,Gata3,Gata6,Gbx2,Gdnf,Gnas,Hdac2,Hectd1,Hes1,Hif1a,Hlx,Hnf1b,Hoxc4,Hs2st1,Id2,Irx1,Irx3,Lef1,Lmbr1,Lmo4,Lmx1b,Lnp,Mab21l2,Mafb,Map3k7,Mbnl1,Mecom,Mecom,Mesp2,Myc,Mycn,Myo7…
GO Biological Process	GO:0010629	negative regulation of gene expression	104	4.25402e-07	0.00365122	3.51079e-05	1.36335	186.305	254	0.0887169	0.120952	141	8.25068e-10	7.08156e-06	5.02238e-08	1.5724	105.571	166	753	0.0585538	0.220451	region_100,region_1008,region_1009,region_1010,region_1011,region_1012,region_1013,region_1014,region_1015,region_1016,region_1018,region_1020,region_1039,region_1045,region_1046,region_1059,region_1060,region_107,region_1070,region_108,region_109,region_1093,region_110,region_1105,region_1106,region_1123,region_1125,region_113,region_114,region_1153,region_1170,region_1171,region_1172,region_118…	1700071K01Rik,Adnp,Atf7ip,Atxn1,Barx2,Bclaf1,Bcor,Bhlhe40,Bmp7,Bnip3l,Brca1,C1d,Cited2,Cryaa,Ctbp2,Ctnnb1,Cux1,Dab2,Dap,Dlx2,Dmbx1,Drosha,Ehmt1,Eif2c2,Elk3,Ezh2,Fbxw11,Fezf1,Fezf2,Fgfr1,Foxb1,Foxc1,Foxd1,Foxd2,Foxd3,Foxi1,Foxi3,Foxj3,Foxk1,Foxn2,Foxn3,Foxo1,Foxo6,Foxp1,Fst,Fzd1,Gata3,Gata6,Gclc,Glis3,Glis3,Hdac2,Hdac9,Hes1,Hinfp,Hnf1b,Id2,Id3,Id4,Il4,Jarid2,Jazf1,Kdm1a,Khdrbs1,Klf12,Lcor,Lef1,Lgr…
GO Biological Process	GO:0009314	response to radiation	105	4.37211e-07	0.00375258	3.57389e-05	1.7493	52.0209	91	0.0247719	0.0433333	650	0.00179577	1	0.0237124	1.46848	38.1346	56	272	0.0197531	0.205882	region_1018,region_1021,region_1052,region_1071,region_1072,region_1073,region_1089,region_1095,region_1098,region_1099,region_1100,region_1136,region_1150,region_1151,region_1152,region_1183,region_1218,region_1219,region_1224,region_1276,region_1277,region_1282,region_1297,region_1349,region_1394,region_1399,region_1471,region_1538,region_1557,region_1558,region_1559,region_1641,region_1669,reg…	Accn1,Aen,Asns,Atxn1,B230120H23Rik,Bcl2,Bhlhe40,Brca1,Cacna1e,Cckar,Ccl2,Clock,Col3a1,Cryaa,Cyp19a1,D7Ertd443e,Dynlrb1,Ercc4,Eya1,Eya3,Foxb1,Gata3,Gja10,Gm5136,Grin2a,Hmgcr,Il12a,Ints7,Kit,Lrp2,Mat2a,Mgmt,Msh2,Msh6,Myc,Nedd4,Nf1,Ngf,Obfc2a,Pde1b,Pde6d,Pik3r1,Plscr1,Rad18,Rev1,Rp1,Sfrp1,Sfrp2,Slc1a3,Tgfb2,Tnfsf11,Trim32,Trpm1,Txn1,Usp28,Yy1
GO Biological Process	GO:0002682	regulation of immune system process	106	4.55264e-07	0.00390753	3.68635e-05	1.47976	114.207	169	0.0543845	0.0804762	311	1.96892e-05	0.168992	0.000543383	1.44921	79.3536	115	566	0.0405644	0.20318	region_1007,region_1008,region_1009,region_101,region_1010,region_1011,region_1031,region_107,region_1076,region_1077,region_108,region_109,region_1095,region_110,region_1114,region_1124,region_1137,region_1150,region_1151,region_1152,region_1215,region_1218,region_1219,region_1228,region_1230,region_1233,region_1234,region_1240,region_1276,region_1277,region_1298,region_1300,region_1301,region_1…	Ap3b1,Aqp3,BC096441,Bcl2,Btn2a2,C8b,Cadm1,Camk1d,Car2,Cartpt,Ccl2,Cd276,Cd28,Cd46,Cd47,Cd59a,Cd80,Cd83,Cd86,Cdk6,Clec2d,Cnr1,Col3a1,Csf1,Ctla4,Ctnnb1,Ddx58,Dlg1,Dusp10,Edn2,Edn3,Ednra,Fert2,Fgr,Foxp1,Gal,Gata3,Gnas,Gpam,Hes1,Hif1a,Hlx,Hps1,Id2,Ifng,Igfbp2,Il12a,Il15,Il17a,Il4,Il7,Inpp5d,Itch,Itgb3,Jag1,Kdm1a,Kitl,Klf10,Klf13,Lef1,Lyst,Mafb,Map3k7,Masp1,Mitf,Mll5,Ndfip1,Nfkbia,Nod1,Pag1,Pawr,Pik3r…
GO Biological Process	GO:0048646	anatomical structure formation involved in morphogenesis	107	4.71762e-07	0.00404914	3.78424e-05	1.38137	170.121	235	0.0810098	0.111905	67	5.88785e-15	5.05354e-11	7.5426e-13	1.83577	85.5225	157	610	0.0553792	0.257377	region_100,region_1008,region_1009,region_1010,region_1011,region_1012,region_1013,region_1014,region_1015,region_1025,region_1027,region_103,region_104,region_107,region_1071,region_1072,region_1073,region_1074,region_108,region_109,region_110,region_1111,region_1119,region_1132,region_1135,region_1141,region_1155,region_1156,region_1163,region_1164,region_1168,region_12,region_120,region_1205,r…	Actg1,Acvr1,Adm,Agtpbp1,Aldh1a3,Angpt1,Anpep,Anxa2,Arhgap24,Axin2,B4galt1,BC096441,Bbs10,Bbs4,Bcl2l11,Bmp7,Bmper,Bmpr2,C1galt1,Cacna1a,Ccl2,Cd9,Cdh13,Chn2,Cited2,Cobl,Coq7,Ctnnb1,Cul3,Cxcr4,Cyp1b1,Dusp4,Dync2li1,Ednra,Efnb2,Egr2,Elk3,Enah,Enpep,Eomes,Epas1,Epb4.1l5,Epha2,Esrrb,Eya1,Fgf1,Fgf18,Fgf9,Fgfr1,Foxb1,Foxc1,Foxd1,Foxd3,Foxi1,Foxi3,Foxp1,Fzd5,Fzd6,Gata3,Gata6,Gbx2,Gdnf,Hdac2,Hectd1,Hif1a,H…
GO Biological Process	GO:0048699	generation of neurons	108	4.94782e-07	0.00424671	3.93214e-05	1.29789	258.111	335	0.12291	0.159524	11	4.95236e-27	4.25061e-23	3.86419e-24	2.00551	114.684	230	818	0.0811287	0.281174	region_100,region_1008,region_1009,region_1010,region_1011,region_1017,region_102,region_1028,region_1030,region_1045,region_1046,region_1050,region_1052,region_107,region_1071,region_1072,region_1073,region_108,region_1088,region_109,region_110,region_1105,region_1106,region_1110,region_1112,region_1113,region_1115,region_1116,region_1117,region_1118,region_1119,region_1123,region_1131,region_11…	A930038C07Rik,Abi2,Abl2,Acsl4,Actg1,Adcy1,Adm,Adnp,Agtpbp1,Aldh1a2,Ank3,Apbb2,Atl1,Atoh1,B3gnt2,Bbs4,Bcl2,Bmp7,Boc,Cacna1a,Camk1d,Caprin2,Ccdc88a,Cckar,Ccnd2,Cdh2,Cdh23,Cdh4,Cln8,Cnga3,Cnr1,Cntf,Cntn2,Cntn4,Creb1,Ctnna1,Ctnnb1,Cux1,Cxcr4,D130043K22Rik,Dab1,Dbx1,Dgkg,Dlx2,Dscaml1,Dtnbp1,Edn3,Egr2,Emx1,En2,Enah,Eomes,Epha2,Epha4,Epha7,Esr2,Etv1,Etv5,Evl,Evx1,Ext1,Eya1,Ezh2,Fezf1,Fezf2,Fgfr1,Foxb1,F…
GO Biological Process	GO:0009605	response to external stimulus	109	5.3131e-07	0.00456024	4.18371e-05	1.34028	205.18	275	0.097705	0.130952	94	1.19439e-12	1.02514e-08	1.09058e-10	1.65082	111.46	184	795	0.064903	0.231446	region_100,region_1008,region_1009,region_1010,region_1011,region_1012,region_1013,region_1014,region_1015,region_1018,region_102,region_1025,region_1028,region_1038,region_1058,region_1059,region_107,region_1075,region_108,region_109,region_110,region_1111,region_1115,region_1116,region_1117,region_1124,region_1131,region_1136,region_1137,region_1141,region_1150,region_1151,region_1152,region_11…	Abl2,Accn1,Acer2,Acsl4,Adm,Adnp,Adsl,Agl,Aldh1a2,Aldh3a1,Angpt1,Ank3,Apbb2,Aqp3,Arg1,Asns,Ass1,Atg16l1,Atg5,Atoh1,Atoh7,B3gnt2,Bckdhb,Bcl2,Bdh1,Becn1,Bhlhe40,Bmp7,Bmpr2,Boc,Brca1,Cacna1a,Cartpt,Cckar,Ccl2,Cda,Cdh4,Chrna7,Clock,Cnr1,Cntn2,Cradd,Ctsl,Cxcr4,Cyp26a1,Cyp26b1,Dap,Ddx58,Dock2,Dock4,Edn2,Edn3,Ednra,Egr2,Enah,Epha2,Epha4,Epha7,Etv1,Evl,Ext1,F3,Fbxo22,Fert2,Fezf1,Fezf2,Foxd1,Foxd2,Foxd3,Fo…
GO Biological Process	GO:0023051	regulation of signaling	110	5.90934e-07	0.00507199	4.6109e-05	1.23942	363.881	451	0.173277	0.214762	39	3.52815e-18	3.02821e-14	7.76465e-16	1.55953	213.526	333	1523	0.11746	0.218647	region_10,region_1018,region_102,region_1020,region_1025,region_1027,region_1028,region_1029,region_103,region_1035,region_1036,region_1038,region_104,region_105,region_1050,region_1053,region_1065,region_1066,region_1067,region_1069,region_107,region_1071,region_1072,region_1073,region_1076,region_1077,region_108,region_1084,region_109,region_11,region_110,region_111,region_1111,region_1117,regi…	1700071K01Rik,4930474N05Rik,Aak1,Abra,Acap2,Acvr1,Adcyap1,Adnp,Adra2a,Adrb3,Agfg2,Akap11,Akap7,Akt2,Angpt1,Arfgap3,Arhgap10,Arhgap15,Arhgef10,Arhgef10l,Arhgef19,Arhgef26,Arhgef3,Asap1,Atxn1,Axin2,B230120H23Rik,Bambi,Bhlhe40,Bmp7,Bmper,Bmpr2,Cacna1a,Cacna1e,Cacng3,Cacng5,Caprin2,Cartpt,Cckar,Ccl2,Cd59a,Cdh13,Cdh2,Chd7,Chn2,Chrna7,Cited2,Cnr1,Cntf,Cntn2,Cops5,Creb1,Crhr2,Csf1,Ctnna1,Ctnnb1,Ctnnd2,C…
GO Biological Process	GO:0051716	cellular response to stimulus	111	6.80724e-07	0.00584266	5.26366e-05	1.14436	743.647	851	0.354117	0.405238	5041	0.619763	1	1	0.99125	686.002	680	4893	0.239859	0.138974	region_10,region_100,region_1007,region_101,region_1012,region_1013,region_1014,region_1015,region_1017,region_1018,region_1019,region_102,region_1020,region_1021,region_1022,region_1026,region_1029,region_103,region_1030,region_1037,region_1038,region_104,region_1040,region_1042,region_1043,region_1044,region_1045,region_1046,region_105,region_1052,region_1053,region_1054,region_1055,region_1056…	1500015O10Rik,1700071K01Rik,2310035K24Rik,4930544G11Rik,5430435G22Rik,6330577E15Rik,A830018L16Rik,AK053790,Abl2,Accn1,Acvr1,Adam19,Adam9,Adcy1,Adcy3,Adcy5,Adcy8,Adcyap1,Adm,Adnp,Adra2a,Adrb3,Aen,Aim2,Akap1,Akap10,Akap2,Akt2,Aldh1a2,Alkbh3,Angpt1,Angptl2,Angptl3,Ank2,Ank3,Anxa2,Arf1,Arfrp1,Arg1,Arhgap10,Arhgap15,Arhgap18,Arhgap21,Arhgap24,Arhgap25,Arhgap26,Arhgap28,Arhgap29,Arhgap32,Arhgap42,Arhga…
GO Biological Process	GO:0045934	negative regulation of nucleobase-containing compound metabolic process	112	7.38326e-07	0.00633706	5.65809e-05	1.3535	187.661	254	0.0893623	0.120952	132	4.56287e-10	3.91631e-06	2.9669e-08	1.58187	105.571	167	753	0.0589065	0.221779	region_100,region_1008,region_1009,region_1010,region_1011,region_1012,region_1013,region_1014,region_1015,region_1016,region_1018,region_1020,region_1021,region_1039,region_1045,region_1046,region_1059,region_1060,region_107,region_1070,region_108,region_109,region_1093,region_110,region_1105,region_1106,region_1123,region_1125,region_1153,region_1170,region_1171,region_1172,region_1189,region_1…	1700071K01Rik,Adra2a,Akt2,Atf7ip,Atxn1,Barx2,Bclaf1,Bcor,Bhlhe40,Bmp7,Brca1,C1d,Cda,Cited2,Ctbp2,Ctnnb1,Cux1,Dab2,Dap,Dlx2,Dmbx1,Ednra,Ehmt1,Elk3,Ercc4,Ezh2,Fbxw11,Fbxw7,Fezf1,Fezf2,Fgfr1,Foxb1,Foxc1,Foxd1,Foxd2,Foxd3,Foxi1,Foxi3,Foxj3,Foxk1,Foxn2,Foxn3,Foxo1,Foxo6,Foxp1,Fst,Fzd1,Gata3,Gata6,Gclc,Glis3,Glis3,Grm7,Hdac2,Hdac9,Hes1,Hinfp,Hnf1b,Id2,Id3,Id4,Il4,Jarid2,Jazf1,Kdm1a,Khdrbs1,Klf12,Lcor,L…
GO Biological Process	GO:0007010	cytoskeleton organization	113	7.6619e-07	0.00657621	5.81966e-05	1.54322	88.1274	136	0.0419654	0.0647619	478	0.000358813	1	0.00644286	1.40265	67.016	94	478	0.033157	0.196653	region_1008,region_1009,region_1010,region_1011,region_1052,region_1071,region_1072,region_1073,region_1085,region_1086,region_1132,region_1150,region_1151,region_1152,region_1153,region_1155,region_1156,region_1168,region_1169,region_1184,region_120,region_1212,region_1213,region_1216,region_1217,region_1223,region_1250,region_1283,region_1353,region_1384,region_1399,region_140,region_1403,regio…	4831426I19Rik,Abl2,Actg1,Actn4,Akap2,Arhgap10,B230120H23Rik,Bbs4,Bcl2,Bfsp2,Brca1,Brwd1,Bub3,Cald1,Cap2,Ccdc88a,Cckar,Clasp1,Cln8,Cntn2,Cryaa,Csrp1,Ctnnb1,Cul3,Daam1,Dlg1,Dock2,Dst,Dtnbp1,Elmo1,Enah,Epb4.1,Epb4.1l2,Epb4.1l3,Epb4.1l5,Evl,Eya1,Fat1,Fert2,Fhdc1,Fhod3,Fmnl2,Foxp1,Ina,Insc,Kif2a,Limch1,Lpin1,Mark1,Mtap1b,Mtap7,Mtss1,Nav1,Ncor1,Nefl,Nf1,Npm1,ORF19,Pawr,Pclo,Pcm1,Pdgfra,Plk1s1,Ppp1r9a,P…
GO Biological Process	GO:0051172	negative regulation of nitrogen compound metabolic process	114	8.19769e-07	0.00703608	6.172e-05	1.35162	187.922	254	0.0894867	0.120952	142	8.52306e-10	7.31534e-06	5.15165e-08	1.56937	106.412	167	759	0.0589065	0.220026	region_100,region_1008,region_1009,region_1010,region_1011,region_1012,region_1013,region_1014,region_1015,region_1016,region_1018,region_1020,region_1021,region_1039,region_1045,region_1046,region_1059,region_1060,region_107,region_1070,region_108,region_109,region_1093,region_110,region_1105,region_1106,region_1123,region_1125,region_1153,region_1170,region_1171,region_1172,region_1189,region_1…	1700071K01Rik,Adra2a,Akt2,Atf7ip,Atxn1,Barx2,Bclaf1,Bcor,Bhlhe40,Bmp7,Brca1,C1d,Cda,Cited2,Ctbp2,Ctnnb1,Cux1,Dab2,Dap,Dlx2,Dmbx1,Ednra,Ehmt1,Elk3,Ercc4,Ezh2,Fbxw11,Fbxw7,Fezf1,Fezf2,Fgfr1,Foxb1,Foxc1,Foxd1,Foxd2,Foxd3,Foxi1,Foxi3,Foxj3,Foxk1,Foxn2,Foxn3,Foxo1,Foxo6,Foxp1,Fst,Fzd1,Gata3,Gata6,Gclc,Glis3,Glis3,Grm7,Hdac2,Hdac9,Hes1,Hinfp,Hnf1b,Id2,Id3,Id4,Il4,Jarid2,Jazf1,Kdm1a,Khdrbs1,Klf12,Lcor,L…
GO Biological Process	GO:0072175	epithelial tube formation	115	9.15019e-07	0.00785361	6.82922e-05	1.90486	35.1732	67	0.0167491	0.0319048	107	7.03848e-12	6.04112e-08	5.64591e-10	2.9957	14.0201	42	100	0.0148148	0.42	region_107,region_108,region_109,region_110,region_12,region_1212,region_1213,region_1282,region_1331,region_1332,region_134,region_1349,region_1360,region_1378,region_1379,region_1415,region_1416,region_1528,region_1564,region_1639,region_1640,region_1782,region_1803,region_1813,region_1855,region_1926,region_1927,region_1931,region_1932,region_1933,region_1934,region_1935,region_2020,region_207…	Adm,Bbs4,Cited2,Cobl,Coq7,Ctnnb1,Enah,Fzd6,Gata3,Gdnf,Hectd1,Hif1a,Hnf1b,Hs2st1,Irx1,Irx3,Lmo4,Map3k7,Nog,Opa1,Osr1,Pax8,Podxl,Rgma,Sall1,Setd2,Sfrp1,Sfrp2,Shh,Shroom3,Sox11,Sox4,Sox9,Stk3,Sufu,Tcfap2a,Tgif1,Traf6,Twist1,Wnt5a,Zeb2,Zic5
GO Biological Process	GO:0022607	cellular component assembly	116	9.79722e-07	0.00840895	7.2491e-05	1.39048	154.622	215	0.0736297	0.102381	758	0.00383623	1	0.0434385	1.22455	125.76	154	897	0.054321	0.171683	region_1008,region_1009,region_101,region_1010,region_1011,region_1016,region_1027,region_1028,region_1052,region_1058,region_1059,region_107,region_108,region_1085,region_1086,region_109,region_110,region_1125,region_113,region_1132,region_1137,region_115,region_1150,region_1151,region_1152,region_116,region_1168,region_1180,region_1181,region_1182,region_1184,region_120,region_1210,region_1212,…	Abl2,Actg1,Actn4,Adsl,Ahctf1,Angpt1,Aqp11,Arg1,Arhgap10,Arhgap26,Arhgap42,Asap1,Atg16l1,Atg5,Atl1,Atl2,Baiap2l1,Bbs10,Bbs4,Bcl2,Becn1,C1qtnf1,Cabyr,Cacna1a,Cadm1,Cadps,Cald1,Ccdc88a,Cd9,Cda,Cdh13,Cdh2,Celf4,Chaf1b,Chn2,Cox10,Cryaa,Cryz,Ctnna1,Ctnnb1,Cul3,Dpys,Dst,Dync2li1,Elp2,Enah,Evl,Fbln5,Fbp1,Fgd4,Fhad1,Foxp1,Gja10,Gm4906,H2afb1,H2afy2,H2afz,Hes1,Hgsnat,Hist1h2br,Hspa4,Hydin,Igf1r,Itgb3,Kcna5…
GO Biological Process	GO:0001838	embryonic epithelial tube formation	117	1.09469e-06	0.00939568	8.0305e-05	1.90513	34.6434	66	0.0164969	0.0314286	110	2.14291e-11	1.83925e-07	1.67205e-09	2.95392	13.8799	41	99	0.0144621	0.414141	region_107,region_108,region_109,region_110,region_12,region_1212,region_1213,region_1282,region_1331,region_1332,region_134,region_1349,region_1360,region_1378,region_1379,region_1415,region_1416,region_1528,region_1564,region_1639,region_1640,region_1782,region_1803,region_1813,region_1855,region_1926,region_1927,region_1931,region_1932,region_1933,region_1934,region_1935,region_2020,region_207…	Adm,Bbs4,Cited2,Cobl,Coq7,Ctnnb1,Enah,Fzd6,Gata3,Gdnf,Hectd1,Hif1a,Hnf1b,Hs2st1,Irx1,Irx3,Lmo4,Map3k7,Nog,Opa1,Osr1,Pax8,Rgma,Sall1,Setd2,Sfrp1,Sfrp2,Shh,Shroom3,Sox11,Sox4,Sox9,Stk3,Sufu,Tcfap2a,Tgif1,Traf6,Twist1,Wnt5a,Zeb2,Zic5
GO Biological Process	GO:0035556	intracellular signal transduction	118	1.1826e-06	0.0101503	8.60191e-05	1.31361	222.289	292	0.105852	0.139048	96	1.49854e-12	1.2862e-08	1.33979e-10	1.56621	141.743	222	1011	0.0783069	0.219585	region_1018,region_1019,region_102,region_1040,region_105,region_1052,region_1058,region_1059,region_1066,region_1067,region_107,region_108,region_1084,region_109,region_110,region_1110,region_1125,region_1137,region_1138,region_1139,region_1140,region_1143,region_1144,region_1154,region_1165,region_1166,region_118,region_1185,region_1186,region_1187,region_119,region_1203,region_1216,region_1217…	4930544G11Rik,5430435G22Rik,Adam9,Adcy1,Adcy3,Adcy5,Adcy8,Adm,Adra2a,Adrb3,Aen,Akt2,Arf1,Arfrp1,Arhgap29,Arhgap5,Arhgef3,Arl15,Arl4a,Arl4c,Arl8b,Asb4,Asb7,B230120H23Rik,Bcar3,Bhlha15,Bok,Brca1,Cabyr,Calcr,Car8,Cartpt,Casr,Ccdc88a,Cdh13,Chn2,Clnk,Cnr1,Cntf,Ctgf,Ctnnal1,Dab1,Dcdc2c,Dcdc5,Dclk2,Depdc1b,Dgkg,Dgki,Diras2,Dmrt1,Dnajc27,Dnmbp,Dok5,Dyrk2,Edn2,Edn3,Ednra,Eif4ebp1,Elmo1,Epha2,Faf1,Fgd4,Fgf…
GO Biological Process	GO:0050767	regulation of neurogenesis	119	1.18671e-06	0.0101855	8.55926e-05	1.45589	116.08	169	0.0552763	0.0804762	55	1.92539e-16	1.65256e-12	3.00466e-14	2.20243	49.4909	109	353	0.038448	0.308782	region_100,region_1017,region_1028,region_1030,region_1045,region_1046,region_1050,region_107,region_1071,region_1072,region_1073,region_108,region_109,region_110,region_1123,region_1131,region_1150,region_1151,region_1152,region_1163,region_1164,region_1168,region_1184,region_1194,region_1248,region_1250,region_1255,region_1256,region_1297,region_1299,region_1343,region_1344,region_1345,region_1…	A930038C07Rik,Abl2,Adnp,Atoh1,Bcl2,Bmp7,Cacna1a,Camk1d,Caprin2,Ccdc88a,Ccnd2,Cdh2,Cdh4,Cnr1,Cntf,Cntn2,Cntn4,Ctnna1,Ctnnb1,Cxcr4,D130043K22Rik,Dab1,Dlx2,Epha4,Etv5,Eya1,Ezh2,Fezf1,Fgfr1,Gdf6,Hdac2,Hes1,Id2,Id4,Ifng,Irx3,Jag1,Kalrn,Lmx1a,Lrrk2,Mark2,Mbp,Mtap1b,Mycn,Nedd4,Nefl,Neurod1,Neurog1,Neurog3,Nf1,Ngf,Nkx2-2,Nlgn1,Nog,Notch3,Nptn,Nr2e1,Nrp1,Ntf3,Ntm,Ntn1,Ntrk2,Ntrk3,Omg,Pax6,Pcm1,Phox2b,Plxn…
GO Biological Process	GO:0051128	regulation of cellular component organization	120	1.22982e-06	0.0105555	8.79626e-05	1.32938	203.854	271	0.0970733	0.129048	136	5.39492e-10	4.63046e-06	3.40475e-08	1.51791	129.125	196	921	0.0691358	0.212812	region_100,region_102,region_103,region_1039,region_104,region_1050,region_1111,region_1114,region_1124,region_1131,region_1150,region_1151,region_1152,region_1153,region_1154,region_1155,region_1156,region_1168,region_1184,region_1194,region_1218,region_1219,region_1223,region_1230,region_1248,region_1250,region_1282,region_1297,region_1299,region_1316,region_1317,region_1318,region_1331,region_…	1700071K01Rik,A930038C07Rik,Aak1,Abl2,Accn1,Actn4,Adam9,Adnp,Akap2,Anapc4,Angpt1,Anxa2,Apbb2,Arhgap15,Arhgef19,Atf7ip,Axin2,Baiap2l1,Bambi,Bbs4,Bcl2,Bcl2l11,Bcor,Bmp7,Bmpr2,Brca1,Brwd1,Cacna1a,Camk1d,Cand1,Caprin2,Ccdc88a,Cd28,Cd47,Cda,Cdc42ep3,Cdh13,Cdh2,Cdh4,Cep76,Chordc1,Clasp1,Clip3,Cnr1,Cntf,Cntn2,Cryaa,Ctgf,Ctnnb1,D130043K22Rik,D7Ertd443e,Dab1,Dab2,Dab2ip,Ddr1,Dlg1,Doc2b,Dstn,Edn3,Eif4ebp1,…
GO Biological Process	GO:0016570	histone modification	121	1.27816e-06	0.0109704	9.06647e-05	1.84718	38.437	71	0.0183034	0.0338095	505	0.000465665	1	0.00791447	1.6032	30.5638	49	218	0.0172839	0.224771	region_1012,region_1013,region_1014,region_1015,region_1016,region_102,region_1070,region_1071,region_1072,region_1073,region_1190,region_1205,region_1206,region_1207,region_1223,region_1316,region_1317,region_1318,region_1361,region_1397,region_1415,region_1426,region_1480,region_1481,region_1482,region_1520,region_1521,region_1559,region_1560,region_1594,region_160,region_161,region_1639,region…	1700071K01Rik,Arhgef10l,Bcor,Cdyl,Clock,Eed,Ehmt1,Elp4,Eya1,Eya2,Eya3,Ezh2,Gm5136,Hdac2,Hdac9,Jak2,Kdm1a,Lef1,Map3k7,Mbip,Mettl8,Mll5,Myst4,Ncoa2,Ncoa3,Nsd1,Prdm5,Prdm9,Prkaa2,Prkca,Prkcb,Prmt7,Rag1,Rcor1,Rest,Rps6ka4,Rps6ka5,Rybp,Sall1,Satb1,Setd1b,Setd2,Sirt1,Smyd2,Smyd3,Suz12,Tada1,Usp22,Usp3
GO Biological Process	GO:0009894	regulation of catabolic process	122	1.34716e-06	0.0115627	9.47758e-05	1.46216	112.162	164	0.0534107	0.0780952	137	6.14334e-10	5.27283e-06	3.84878e-08	1.74554	66.4552	116	474	0.0409171	0.244726	region_101,region_1022,region_1027,region_103,region_104,region_1053,region_1058,region_1059,region_1066,region_1067,region_107,region_108,region_109,region_110,region_111,region_1131,region_1136,region_1165,region_1203,region_1216,region_1217,region_122,region_1278,region_1279,region_1280,region_1284,region_1301,region_1307,region_1308,region_1356,region_1357,region_1371,region_1372,region_1375,…	Acap2,Adam9,Adra2a,Agfg2,Akt2,Angptl3,Arfgap3,Arhgap10,Arhgap15,Arhgap18,Arhgap21,Arhgap24,Arhgap25,Arhgap26,Arhgap28,Arhgap29,Arhgap32,Arhgap42,Arhgap5,Arhgef19,Arntl,Asap1,Axin2,Becn1,Casr,Chn2,Cnr1,Cul4b,Dab2,Dab2ip,Dap,Depdc1b,Dgki,Dock2,Dock4,Epha2,Epha4,Faf1,Fam13b,Fbp1,Fbxo22,Fbxw7,Gclc,Gnao1,Grin2a,Grin2c,Hif1a,Ier3,Ifng,Iqgap1,Iqgap2,Itch,Lrrk2,Mad2l1,Myl4,Mylip,N4bp1,Ncor1,Ndfip1,Nedd4,…
GO Biological Process	GO:0045944	positive regulation of transcription from RNA polymerase II promoter	123	1.48549e-06	0.01275	0.000103658	1.3691	165.072	226	0.0786056	0.107619	47	1.66866e-17	1.43221e-13	3.04725e-15	1.95552	79.7742	156	569	0.0550265	0.274165	region_100,region_1007,region_1008,region_1009,region_1010,region_1011,region_1025,region_1028,region_1045,region_1046,region_1050,region_1053,region_1065,region_107,region_1070,region_1071,region_1072,region_1073,region_1076,region_1077,region_108,region_109,region_1090,region_1093,region_110,region_1101,region_1105,region_1106,region_1114,region_1117,region_1118,region_1170,region_1171,region_1…	Abra,Akt2,Arntl,Atoh1,Atxn1,Barx2,Bhlha15,Bhlhe23,Bmp3,Brca1,Cand1,Caprin2,Ccnh,Cd28,Cited2,Clock,Cops5,Creb1,Csrnp1,Ctnnb1,Ddx58,Dlx2,Egr2,En2,Eomes,Epas1,Esrrb,Evx1,Eya1,Fgf1,Foxc1,Foxd1,Foxd2,Foxd3,Foxi1,Foxo1,Foxo6,Foxp1,Gata3,Gata5,Gata6,Gdnf,Glis3,Glis3,Gtf2f2,Hdac2,Hes1,Hif1a,Hmgn3,Hnf1b,Ifng,Il17a,Il17f,Il4,Kdm1a,Klf12,Klf13,Klf6,Lef1,Lhx3,Lmo4,Lmx1b,Lpin1,Mafb,Maml1,Maml2,Maml3,Mecom,Mec…
GO Biological Process	GO:0044093	positive regulation of molecular function	124	1.58401e-06	0.0135956	0.000109642	1.32257	207.172	274	0.0986534	0.130476	124	9.90967e-11	8.50546e-07	6.85925e-09	1.55127	125.059	194	892	0.0684303	0.217489	region_101,region_1022,region_1027,region_1029,region_103,region_1030,region_104,region_105,region_1050,region_1053,region_1066,region_1067,region_1131,region_1144,region_1150,region_1151,region_1152,region_1155,region_1156,region_1165,region_118,region_1184,region_119,region_1203,region_1216,region_1217,region_122,region_1223,region_1250,region_1261,region_1278,region_1279,region_1280,region_128…	Abl2,Abra,Acap2,Adam9,Adcy1,Adcy3,Adcy5,Adcyap1,Adnp,Adra2a,Adrb3,Angpt1,Anxa2,Anxa3,Arfgap3,Arhgap10,Arhgap15,Arhgap18,Arhgap21,Arhgap24,Arhgap25,Arhgap26,Arhgap28,Arhgap29,Arhgap32,Arhgap42,Arhgap5,Arhgef19,Arid5b,Asap1,Axin2,B230120H23Rik,Bambi,Bcl2,Bok,Btg1,Calcr,Cald1,Camk1d,Caprin2,Cartpt,Casr,Ccdc88a,Cckar,Ccnd2,Cdc25b,Chn2,Csf1,Ctgf,Cyb5b,Dab1,Dab2ip,Dap,Depdc1b,Dgkg,Dgki,Dlg1,Dock2,Dock4…
GO Biological Process	GO:0051960	regulation of nervous system development	125	1.62561e-06	0.0139526	0.000111621	1.43065	125.118	179	0.0595802	0.0852381	58	7.96992e-16	6.84058e-12	1.17941e-13	2.11405	54.3979	115	388	0.0405644	0.296392	region_100,region_1017,region_102,region_1028,region_1030,region_1045,region_1046,region_1050,region_107,region_1071,region_1072,region_1073,region_108,region_109,region_110,region_1123,region_1131,region_1150,region_1151,region_1152,region_1163,region_1164,region_1168,region_1184,region_1194,region_1248,region_1250,region_1255,region_1256,region_1297,region_1299,region_1343,region_1344,region_13…	A930038C07Rik,Abl2,Accn1,Adnp,Atoh1,Bcl2,Bmp7,Cacna1a,Camk1d,Caprin2,Ccdc88a,Ccnd2,Cdh2,Cdh4,Cnr1,Cntf,Cntn2,Cntn4,Ctnna1,Ctnnb1,Cxcr4,D130043K22Rik,Dab1,Dlx2,Epha4,Etv5,Eya1,Ezh2,Fezf1,Fgfr1,Gdf6,Hdac2,Hes1,Id2,Id4,Ifng,Irx3,Jag1,Kalrn,Lmx1a,Lrrk2,Mark2,Mbp,Mtap1b,Mycn,Nedd4,Nefl,Neurod1,Neurog1,Neurog3,Nf1,Ngf,Nkx2-2,Nlgn1,Nog,Notch3,Nptn,Nr2e1,Nrp1,Nrxn1,Ntf3,Ntm,Ntn1,Ntrk2,Ntrk3,Omg,Pax6,Pcm1…
GO Biological Process	GO:0008104	protein localization	126	1.7435e-06	0.0149644	0.000118765	1.36156	168.924	230	0.0804402	0.109524	432	0.000209485	1	0.00416207	1.28489	136.976	176	977	0.0620811	0.180143	region_100,region_103,region_1038,region_104,region_1041,region_1050,region_1071,region_1072,region_1073,region_1078,region_1084,region_111,region_1111,region_1137,region_1142,region_1143,region_1153,region_1166,region_1168,region_118,region_119,region_1202,region_1210,region_1213,region_1236,region_1237,region_1248,region_1255,region_1262,region_1263,region_1264,region_1269,region_1283,region_12…	4831426I19Rik,5430435G22Rik,Abra,Accn1,Actn4,Ahctf1,Ahcyl1,Ahi1,Aim2,Akap10,Akap2,Angpt1,Ank2,Ank3,Ap3b1,Apba2,Arf1,Arfgap3,Arfip1,Arntl,Atg10,Atg16l1,Axin2,Bbs4,Bcap29,Bmp7,Bub3,Cacna1a,Cadps,Chmp4c,Chmp6,Clasp1,Clip3,Cltc,Cntn2,Cog6,Cpe,Ctnnb1,Dlg1,Dnajc19,Doc2b,Egr2,Exoc2,Exoc4,Exoc5,Eya1,Faf1,Fam125b,Fbln5,Fgf9,Fras1,Gabarapl2,Gpam,Grin2a,Grin2b,Grin2c,Grip1,Hcn1,Hes1,Hinfp,Hps1,Hspa4,Id4,Ifn…
GO Biological Process	GO:0016569	covalent chromatin modification	127	2.02666e-06	0.0173948	0.000136967	1.82229	38.962	71	0.0185533	0.0338095	536	0.000644862	1	0.0103262	1.58144	30.9844	49	221	0.0172839	0.22172	region_1012,region_1013,region_1014,region_1015,region_1016,region_102,region_1070,region_1071,region_1072,region_1073,region_1190,region_1205,region_1206,region_1207,region_1223,region_1316,region_1317,region_1318,region_1361,region_1397,region_1415,region_1426,region_1480,region_1481,region_1482,region_1520,region_1521,region_1559,region_1560,region_1594,region_160,region_161,region_1639,region…	1700071K01Rik,Arhgef10l,Bcor,Cdyl,Clock,Eed,Ehmt1,Elp4,Eya1,Eya2,Eya3,Ezh2,Gm5136,Hdac2,Hdac9,Jak2,Kdm1a,Lef1,Map3k7,Mbip,Mettl8,Mll5,Myst4,Ncoa2,Ncoa3,Nsd1,Prdm5,Prdm9,Prkaa2,Prkca,Prkcb,Prmt7,Rag1,Rcor1,Rest,Rps6ka4,Rps6ka5,Rybp,Sall1,Satb1,Setd1b,Setd2,Sirt1,Smyd2,Smyd3,Suz12,Tada1,Usp22,Usp3
GO Biological Process	GO:0048468	cell development	128	2.05533e-06	0.0176409	0.00013782	1.27491	265.902	339	0.12662	0.161429	22	1.91461e-22	1.64331e-18	7.46959e-20	1.84093	129.826	239	926	0.0843033	0.258099	region_100,region_1008,region_1009,region_1010,region_1011,region_1017,region_102,region_1025,region_1027,region_1028,region_1052,region_107,region_1070,region_1074,region_108,region_1088,region_109,region_110,region_1105,region_1106,region_1110,region_1112,region_1113,region_1115,region_1116,region_1117,region_1118,region_1119,region_1125,region_1131,region_1132,region_1133,region_1141,region_11…	Abi2,Acsl4,Actg1,Acvr1,Adcy1,Adm,Aldh1a2,Ank3,Apbb2,Arid5b,Atg5,Atl1,Atoh1,B3gnt2,B4galt1,Bbs4,Bcl2,Bfsp1,Bfsp2,Bhlha15,Bmp7,Boc,Bpgm,Brca1,Cabyr,Cacna1a,Cckar,Cd9,Cdc25b,Cdh23,Cdh4,Chn2,Cited2,Cnga3,Cntf,Cntn2,Cntn4,Creb1,Cryaa,Cst10,Ctnna1,Ctnnb1,Cul3,Cxcr4,Cyp26a1,Dab1,Dab2,Dgkg,Dner,Dscaml1,Dtnbp1,Edn3,Ednra,Egr2,En2,Enah,Eomes,Epas1,Epb4.1l5,Epha2,Epha4,Epha7,Esr2,Esrrb,Etv1,Etv5,Evl,Ext1,Fe…
GO Biological Process	GO:0045664	regulation of neuron differentiation	129	2.12364e-06	0.0182272	0.000141296	1.47241	103.912	153	0.0494817	0.0728571	45	1.1802e-17	1.01296e-13	2.25103e-15	2.41068	40.2376	97	287	0.0342152	0.337979	region_100,region_1017,region_1030,region_1045,region_1046,region_1050,region_107,region_1071,region_1072,region_1073,region_108,region_109,region_110,region_1131,region_1150,region_1151,region_1152,region_1168,region_1184,region_1194,region_1248,region_1250,region_1255,region_1256,region_1297,region_1299,region_1343,region_1344,region_1345,region_1353,region_1399,region_1409,region_1425,region_1…	A930038C07Rik,Abl2,Adnp,Atoh1,Bcl2,Bmp7,Cacna1a,Camk1d,Caprin2,Ccdc88a,Ccnd2,Cdh2,Cdh4,Cnr1,Cntf,Cntn2,Cntn4,D130043K22Rik,Dab1,Epha4,Etv5,Eya1,Fezf1,Fgfr1,Gdf6,Hdac2,Hes1,Id2,Id4,Ifng,Irx3,Jag1,Kalrn,Lmx1a,Lrrk2,Mark2,Mbp,Mtap1b,Nedd4,Nefl,Neurod1,Neurog1,Neurog3,Ngf,Nkx2-2,Nlgn1,Nog,Notch3,Nptn,Nr2e1,Nrp1,Ntm,Ntn1,Ntrk2,Ntrk3,Omg,Pax6,Phox2b,Plxna4,Pmp22,Pten,Ptk2,Ptk2b,Rap2a,Rapgef4,Rest,Rhoc,…
GO Biological Process	GO:0040011	locomotion	130	2.21193e-06	0.018985	0.000146039	1.34965	175.601	237	0.0836198	0.112857	61	1.4779e-15	1.26848e-11	2.07948e-13	1.84288	87.9059	162	627	0.0571429	0.258373	region_100,region_1008,region_1009,region_1010,region_1011,region_1012,region_1013,region_1014,region_1015,region_102,region_1028,region_1085,region_1086,region_1093,region_1105,region_1106,region_111,region_1112,region_1113,region_1115,region_1116,region_1117,region_1125,region_1131,region_1132,region_1141,region_1155,region_1156,region_1163,region_1164,region_1168,region_1169,region_1180,region…	A930038C07Rik,Abi2,Acvr1,Angpt1,Ank3,Apbb2,Arid5b,Atoh1,B3gnt2,B4galt1,Bambi,Bmp7,Boc,Cabyr,Cacna1e,Ccdc88a,Cckar,Ccl2,Cd34,Cd47,Cdh13,Cdh2,Cdh4,Chrna7,Cntn2,Cul3,Cxcr4,Cyp1b1,D130043K22Rik,Dab1,Dock1,Dock2,Dock4,Dst,Edn2,Edn3,Efnb2,Egr2,Enah,Enpep,Epb4.1l5,Epha2,Epha4,Epha7,Esr2,Etv1,Evl,Ext1,Fat1,Fert2,Fezf1,Fezf2,Fgf15,Fgfr1,Foxb1,Foxc1,Foxd1,Foxd2,Foxd3,Foxp1,Fut8,Gap43,Gata3,Gbx2,Gdnf,Grin2a…
GO Biological Process	GO:0051253	negative regulation of RNA metabolic process	131	2.37654e-06	0.0203978	0.000155708	1.34627	177.527	239	0.0845368	0.113809	169	8.05789e-09	6.91609e-05	4.09236e-07	1.55364	99.1219	154	707	0.054321	0.217822	region_100,region_1008,region_1009,region_1010,region_1011,region_1012,region_1013,region_1014,region_1015,region_1016,region_1018,region_1020,region_1039,region_1045,region_1046,region_1059,region_1060,region_107,region_1070,region_108,region_109,region_1093,region_110,region_1105,region_1106,region_1123,region_1125,region_1153,region_1170,region_1171,region_1172,region_1189,region_1223,region_1…	1700071K01Rik,Akt2,Atf7ip,Atxn1,Barx2,Bclaf1,Bcor,Bhlhe40,Bmp7,Brca1,C1d,Cited2,Ctbp2,Ctnnb1,Cux1,Dab2,Dap,Dlx2,Dmbx1,Ehmt1,Elk3,Ezh2,Fbxw11,Fezf1,Fezf2,Fgfr1,Foxb1,Foxc1,Foxd1,Foxd2,Foxd3,Foxi1,Foxi3,Foxj3,Foxk1,Foxn2,Foxn3,Foxo1,Foxo6,Foxp1,Fst,Fzd1,Gata3,Gata6,Gclc,Glis3,Glis3,Hdac2,Hdac9,Hes1,Hinfp,Hnf1b,Id2,Id3,Id4,Il4,Jarid2,Jazf1,Kdm1a,Khdrbs1,Klf12,Lcor,Lef1,Lgr4,Lmcd1,Lpin1,Mecom,Mospd1,…
GO Biological Process	GO:0048584	positive regulation of response to stimulus	132	2.41678e-06	0.0207432	0.000157145	1.35933	166.258	226	0.0791706	0.107619	214	1.38195e-07	0.00118613	5.54265e-06	1.48796	104.169	155	743	0.0546737	0.208614	region_10,region_102,region_1020,region_1029,region_1050,region_107,region_1071,region_1072,region_1073,region_108,region_109,region_11,region_110,region_1111,region_1114,region_1150,region_1151,region_1152,region_1165,region_1168,region_118,region_1189,region_119,region_1218,region_1219,region_1248,region_1249,region_1255,region_1256,region_1276,region_1277,region_1282,region_1284,region_1297,re…	Aak1,Abra,Adra2a,Adrb3,Akt2,Angpt1,BC096441,Bambi,Bcl2,Becn1,Bmp7,Bmper,Bmpr2,Brca1,C8b,Cadm1,Camk1d,Caprin2,Ccl2,Cd28,Cd47,Cd86,Cdh13,Cited2,Cnr1,Cntf,Cntn2,Crhr2,Csf1,Ctla4,Ctnna1,Ctnnb1,Dab2,Dgki,Dkk2,Dock2,Edn2,Edn3,Ednra,Exoc4,Eya1,Eya3,F3,Fbxw7,Fgf1,Fgf15,Fgf18,Fgf23,Fgf9,Foxd1,Foxd2,Gata3,Gata6,Gdf6,Ghr,Gm5136,Golph3,Grb10,Hes1,Hif1a,Ifng,Igf1r,Ikbke,Il12a,Il15,Il4,Jag1,Jak2,Kitl,Kl,Ldlrap…
GO Biological Process	GO:0051641	cellular localization	133	2.52516e-06	0.0216735	0.000162959	1.34315	179.428	241	0.0854421	0.114762	268	3.15712e-06	0.0270975	0.00010111	1.36233	140.201	191	1000	0.0673721	0.191	region_103,region_1038,region_104,region_1047,region_1048,region_1049,region_1050,region_1071,region_1072,region_1073,region_1085,region_1086,region_1111,region_1138,region_1139,region_1140,region_1142,region_1150,region_1151,region_1152,region_1153,region_1168,region_1190,region_1202,region_1212,region_1213,region_1227,region_1236,region_1237,region_1248,region_1283,region_1300,region_1311,regio…	1190002N15Rik,2510003E04Rik,4831426I19Rik,Abra,Adm,Ahcyl1,Ahi1,Aim2,Angpt1,Ank2,Anxa3,Ap3b1,Arfgap3,Arfip1,Arl4c,Arntl,Atxn1,Axin2,Bbs4,Bcap29,Bcl2,Bhlha15,Bmp7,Bub3,Cacna1a,Cacna1b,Cadps,Cartpt,Cckar,Cdh13,Cga,Chic2,Clasp1,Cltc,Cntn2,Col4a3bp,Cpe,Creb3l2,Ctgf,Ctnnb1,Cux1,Dab1,Ddx39,Doc2b,Dock2,Dst,Dync1i1,Edn3,Egr2,Enah,Ergic2,Exoc2,Exoc4,Exoc5,Exoc6b,Eya1,Faf1,Fbln5,Fbxo22,Fgf9,Glra1,Gnpda1,Gpa…
GO Biological Process	GO:0051098	regulation of binding	134	2.54704e-06	0.0218612	0.000163143	1.86627	34.8289	65	0.0165852	0.0309524	433	0.000214003	1	0.00424201	1.85122	18.3663	34	131	0.011993	0.259542	region_1050,region_1150,region_1151,region_1152,region_1155,region_1156,region_1271,region_1316,region_1317,region_1318,region_1349,region_1415,region_1416,region_1484,region_1485,region_1578,region_1579,region_1629,region_1630,region_1631,region_1663,region_1664,region_1665,region_1669,region_1723,region_1724,region_1728,region_182,region_1873,region_1874,region_2024,region_2031,region_2032,regi…	Adnp,Anxa2,Bambi,Bcl2,Cald1,Caprin2,Dab2,Epb4.1,Epb4.1l5,Gata3,Hes1,Hspa4,Id2,Jak2,Ldlrap1,Lef1,Myc,Nog,P2ry1,Pacs1,Pcbd1,Plscr1,Pon1,Runx1t1,Smad2,Smad3,Sox11,Tgfbr3,Tnks,Traf6,Twist1,Txn1,Wnt3a,Zfp462
GO Biological Process	GO:2000113	negative regulation of cellular macromolecule biosynthetic process	135	2.72602e-06	0.0233974	0.000173314	1.33603	184.876	247	0.0880361	0.117619	191	2.72672e-08	0.000234034	1.22531e-06	1.51099	106.553	161	760	0.0567901	0.211842	region_10,region_100,region_1008,region_1009,region_1010,region_1011,region_1012,region_1013,region_1014,region_1015,region_1016,region_1018,region_102,region_1020,region_1039,region_1045,region_1046,region_1050,region_1059,region_1060,region_107,region_1070,region_108,region_109,region_1093,region_11,region_110,region_1105,region_1106,region_1123,region_1125,region_1153,region_1170,region_1171,r…	1700071K01Rik,Acer2,Atf7ip,Atxn1,Barx2,Bclaf1,Bcor,Bhlhe40,Bmp7,Brca1,C1d,Caprin2,Cited2,Ctbp2,Ctnnb1,Cux1,Dab2,Dap,Dlx2,Dmbx1,Ehmt1,Eif2c2,Eif4ebp1,Elk3,Enpp1,Ezh2,Fbxw11,Fbxw7,Fezf1,Fezf2,Fgfr1,Foxb1,Foxc1,Foxd1,Foxd2,Foxd3,Foxi1,Foxi3,Foxj3,Foxk1,Foxn2,Foxn3,Foxo1,Foxo6,Foxp1,Fst,Fzd1,Gata3,Gata6,Gclc,Glis3,Glis3,Grb10,Hdac2,Hdac9,Hes1,Hinfp,Hnf1b,Id2,Id3,Id4,Il4,Jarid2,Jazf1,Kdm1a,Khdrbs1,Klf…
GO Biological Process	GO:0033058	directional locomotion	136	2.73962e-06	0.0235141	0.000172898	6.9704	1.43464	10	0.000683161	0.00476191	917	0.00985627	1	0.0922534	5.34947	0.560803	3	4	0.0010582	0.75	region_111,region_1403,region_1404,region_1405,region_701,region_702,region_703,region_704,region_705,region_706	Grin2a,Grin2c,Ttn
GO Biological Process	GO:0007417	central nervous system development	137	2.76085e-06	0.0236964	0.000172967	1.32014	200.737	265	0.0955889	0.126191	25	3.39606e-21	2.91484e-17	1.16594e-18	2.0279	85.8029	174	612	0.0613757	0.284314	region_100,region_1008,region_1009,region_1010,region_1011,region_1017,region_102,region_1027,region_1028,region_1038,region_1045,region_1046,region_107,region_1070,region_108,region_1084,region_109,region_1093,region_110,region_1110,region_1111,region_1117,region_1118,region_1119,region_1131,region_1133,region_1141,region_1144,region_1147,region_1148,region_1150,region_1151,region_1152,region_11…	Agtpbp1,Aldh1a2,Aldh1a3,Aldh5a1,Anxa3,Atoh1,Bbs4,Bcl2,Bdh1,Bmpr2,Bok,Brca1,Cacna1a,Cadm1,Cckar,Cd9,Chd7,Cited2,Cln8,Cntf,Cntn2,Cntn4,Creb1,Ctnnb1,Cttnbp2,Cxcr4,Cyp19a1,Cyp26a1,Dab1,Dbx1,Dlx2,Dmbx1,Dner,Dscaml1,Egr2,Emx1,En2,Eomes,Epha4,Epha7,Esr2,Evx1,Exoc4,Ext1,Ezh2,Fezf1,Fezf2,Fgfr1,Foxb1,Foxc1,Foxp1,Fzd1,Fzd5,Fzd6,Fzd7,Fzd9,Gbx2,Gnao1,Grin2a,Grin2b,Hdac2,Hes1,Hnf1b,Hnmt,Hydin,Id2,Id3,Id4,Igf1r…
GO Biological Process	GO:0033036	macromolecule localization	138	2.79861e-06	0.0240205	0.000174061	1.32072	199.891	264	0.0951864	0.125714	445	0.000249938	1	0.00482071	1.2551	163.334	205	1165	0.0723104	0.175966	region_100,region_103,region_1038,region_104,region_1041,region_1050,region_1071,region_1072,region_1073,region_1078,region_1084,region_1095,region_111,region_1111,region_1137,region_1142,region_1143,region_1153,region_1166,region_1168,region_118,region_119,region_1199,region_1202,region_1210,region_1213,region_1236,region_1237,region_1248,region_1255,region_1256,region_1262,region_1263,region_12…	4831426I19Rik,5430435G22Rik,Abca4,Abcg8,Abra,Accn1,Actn4,Ahctf1,Ahcyl1,Ahi1,Aim2,Akap10,Akap2,Angpt1,Angptl3,Ank2,Ank3,Ap3b1,Apba2,Arf1,Arfgap3,Arfip1,Arntl,Atg10,Atg16l1,Atp10a,Atp10d,Atp11b,Atp8a1,Axin2,Bbs4,Bcap29,Bdkrb2,Bmp7,Bub3,Cacna1a,Cadps,Cftr,Chmp4c,Chmp6,Clasp1,Clip3,Cltc,Cntn2,Cog6,Col4a3bp,Cpe,Ctnnb1,Ddx39,Dlg1,Dnajc19,Doc2b,Egr2,Enpp1,Exoc2,Exoc4,Exoc5,Eya1,Faf1,Fam125b,Fbln5,Fgf9,F…
GO Biological Process	GO:0044281	small molecule metabolic process	139	2.80532e-06	0.0240781	0.000173224	1.2634	278.614	352	0.132673	0.167619	829	0.00643482	1	0.0666225	1.14602	241.706	277	1724	0.0977072	0.160673	region_10,region_100,region_1026,region_1029,region_1039,region_1040,region_1041,region_1045,region_1046,region_1051,region_1060,region_1061,region_1062,region_1063,region_1074,region_1079,region_11,region_1102,region_1107,region_1118,region_1121,region_1122,region_1154,region_1160,region_1161,region_1162,region_1163,region_1170,region_1171,region_1172,region_1173,region_1177,region_1178,region_1…	1110034B05Rik,1700106N22Rik,4833442J19Rik,Aadat,Abca13,Abca4,Abcb5,Abcc2,Abcc4,Abcg8,Accsl,Acer2,Aco1,Acsl4,Adc,Adcy1,Adcy3,Adcy5,Adcy8,Adnp,Adsl,Ahcyl1,Akr1d1,Akt2,Aldh1a2,Aldh1a3,Aldh1l1,Aldh5a1,Aldh8a1,Alkbh3,Ampd3,Angptl3,Arg1,Arl4a,Asns,Ass1,Atf7ip,Atic,Atl1,Atl2,Atp12a,Atp1b3,Atp5g3,Auh,B4galt1,Bcat1,Bckdhb,Bpgm,Brca1,Btg1,Cacna1a,Car1,Car12,Car13,Car2,Car5a,Car8,Cda,Cftr,Cga,Chd1l,Chrna7,C…
GO Biological Process	GO:0022603	regulation of anatomical structure morphogenesis	140	2.96914e-06	0.0254841	0.000182029	1.41137	128.953	182	0.0614061	0.0866667	101	3.67622e-12	3.1553e-08	3.12406e-10	1.85602	65.1934	121	465	0.0426808	0.260215	region_100,region_1008,region_1009,region_1010,region_1011,region_1025,region_103,region_104,region_1050,region_107,region_1071,region_1072,region_1073,region_1076,region_1077,region_108,region_1080,region_109,region_110,region_1110,region_1131,region_1150,region_1151,region_1152,region_1155,region_1156,region_1168,region_1223,region_1250,region_1282,region_1284,region_1297,region_1300,region_130…	Adam9,Adnp,Akap2,Angptl3,Anxa3,Arhgap15,Axin2,B4galt1,Bai2,Bai3,Bambi,Bcl2,Bcor,Bhlhe23,Bmp7,Brwd1,Btg1,Cacna1a,Caprin2,Ccl2,Cd59a,Cdc42ep3,Cdh2,Cdh4,Cited2,Cntf,Cntn2,Crhr2,Csf1,Ctnnb1,Dab1,Dusp6,Ednra,Epb4.1l5,Epha2,Epha4,Etv5,Eya1,F3,Fbxw7,Fermt2,Fgd4,Fgf1,Fgf3,Fgfr1,Fgr,Fmnl2,Foxo6,Foxp1,Fzd6,Fzd7,Gata3,Gata6,Gdnf,Hes1,Hgf,Hnf1b,Htatip2,Ifng,Il17f,Lef1,Lgr4,Lrrk2,Mark2,Mbp,Mtap1b,Myc,Myl12b,N…
GO Biological Process	GO:0035148	tube formation	141	3.39335e-06	0.0291252	0.000206561	1.81172	38.0854	69	0.0181359	0.0328571	111	2.30618e-11	1.9794e-07	1.78324e-09	2.86638	15.0015	43	107	0.0151676	0.401869	region_107,region_108,region_109,region_110,region_12,region_1212,region_1213,region_1282,region_1331,region_1332,region_134,region_1349,region_1360,region_1378,region_1379,region_1415,region_1416,region_1441,region_1442,region_1528,region_1564,region_1639,region_1640,region_1782,region_1803,region_1813,region_1855,region_1926,region_1927,region_1931,region_1932,region_1933,region_1934,region_193…	Adm,Bbs4,Bcl2l11,Cited2,Cobl,Coq7,Ctnnb1,Enah,Fzd6,Gata3,Gdnf,Hectd1,Hif1a,Hnf1b,Hs2st1,Irx1,Irx3,Lmo4,Map3k7,Nog,Opa1,Osr1,Pax8,Podxl,Rgma,Sall1,Setd2,Sfrp1,Sfrp2,Shh,Shroom3,Sox11,Sox4,Sox9,Stk3,Sufu,Tcfap2a,Tgif1,Traf6,Twist1,Wnt5a,Zeb2,Zic5
GO Biological Process	GO:0060562	epithelial tube morphogenesis	142	3.63164e-06	0.0311704	0.00021951	1.55767	73.8282	115	0.0351563	0.0547619	71	1.82705e-14	1.56816e-10	2.20868e-12	2.4913	29.302	73	209	0.0257496	0.349282	region_107,region_1071,region_1072,region_1073,region_1074,region_108,region_109,region_110,region_1150,region_1151,region_1152,region_1194,region_12,region_1205,region_1206,region_1207,region_1212,region_1213,region_1255,region_1256,region_1282,region_1300,region_1331,region_1332,region_134,region_1349,region_1360,region_1368,region_1378,region_1379,region_1415,region_1416,region_1433,region_143…	Adm,Aldh1a2,Bbs4,Bcl2,Cited2,Cobl,Coq7,Csf1,Ctnnb1,Ddr1,Dlg1,Enah,Epha2,Eya1,Foxd1,Foxd2,Foxd3,Fzd6,Gata3,Gdnf,Hectd1,Hes1,Hif1a,Hnf1b,Hs2st1,Irx1,Irx3,Kif26b,Lama1,Lgr4,Lmo4,Map3k7,Mtss1,Myc,Ncoa3,Nog,Ntn1,Opa1,Osr1,Pax8,Pbx1,Pbx3,Pgr,Podxl,Prkx,Rdh10,Rgma,Robo1,Sall1,Setd2,Sfrp1,Sfrp2,Shh,Shroom3,Smad3,Sox11,Sox2,Sox4,Sox9,Stk3,Sufu,Tbx20,Tbx3,Tcfap2a,Tcfap2c,Tgif1,Traf6,Twist1,Wnt11,Wnt3a,Wnt5…
GO Biological Process	GO:0032989	cellular component morphogenesis	143	4.26812e-06	0.0366333	0.000256177	1.35093	165.071	223	0.0786054	0.10619	40	3.84643e-18	3.30139e-14	8.25348e-16	2.01487	74.4466	150	531	0.0529101	0.282486	region_100,region_1008,region_1009,region_101,region_1010,region_1011,region_102,region_1027,region_1028,region_107,region_1070,region_108,region_109,region_110,region_1110,region_1115,region_1116,region_1117,region_1118,region_1119,region_1131,region_1132,region_1141,region_1150,region_1151,region_1152,region_1153,region_1155,region_1156,region_1163,region_1164,region_1168,region_1180,region_118…	Actg1,Adcy1,Adm,Ahi1,Ank3,Apbb2,Asap1,Atl1,Atoh1,B3gnt2,Bbs10,Bbs4,Bcl2,Bmp7,Boc,Brca1,Cacna1a,Cadm1,Cap2,Cckar,Cd9,Cdh23,Cdh4,Chn2,Cntn2,Col4a3bp,Coq7,Creb1,Cryaa,Ctnna1,Ctnnb1,Cul3,Cxcr4,Dab2,Dtnbp1,Dync2li1,Egr2,Enah,Eomes,Epb4.1l5,Epha2,Epha4,Epha7,Esrrb,Etv1,Evl,Ext1,Fezf1,Fezf2,Foxb1,Foxc1,Foxd1,Foxd2,Foxd3,Foxp1,Fzd1,Fzd5,Fzd6,Fzd7,Gap43,Gata3,Gbx2,Gdnf,Hes1,Hgf,Hif1a,Hydin,Igf1r,Itgb3,Jak…
GO Biological Process	GO:0010558	negative regulation of macromolecule biosynthetic process	144	4.34348e-06	0.0372801	0.000258889	1.32453	188.746	250	0.0898792	0.119048	189	2.66462e-08	0.000228704	1.21008e-06	1.50304	109.777	165	783	0.0582011	0.210728	region_10,region_100,region_1008,region_1009,region_1010,region_1011,region_1012,region_1013,region_1014,region_1015,region_1016,region_1018,region_102,region_1020,region_1039,region_1045,region_1046,region_1050,region_1059,region_1060,region_107,region_1070,region_108,region_109,region_1093,region_11,region_110,region_1105,region_1106,region_1123,region_1125,region_1137,region_1153,region_1154,r…	1700071K01Rik,Acer2,Atf7ip,Atxn1,Barx2,Bclaf1,Bcor,Bhlhe40,Bmp7,Brca1,C1d,Caprin2,Cd276,Cited2,Ctbp2,Ctnnb1,Cux1,Dab2,Dap,Dlx2,Dmbx1,Ehmt1,Eif2c2,Eif4ebp1,Elk3,Enpp1,Ezh2,Fbxw11,Fbxw7,Fezf1,Fezf2,Fgfr1,Foxb1,Foxc1,Foxd1,Foxd2,Foxd3,Foxi1,Foxi3,Foxj3,Foxk1,Foxn2,Foxn3,Foxo1,Foxo6,Foxp1,Fst,Fzd1,Gata3,Gata6,Gclc,Glis3,Glis3,Grb10,Hdac2,Hdac9,Hes1,Hinfp,Hnf1b,Id2,Id3,Id4,Il4,Inhbb,Inpp5d,Jarid2,Jazf…
GO Biological Process	GO:2000145	regulation of cell motility	145	4.42216e-06	0.0379554	0.000261761	1.50302	87.1581	131	0.0415039	0.0623809	97	1.78961e-12	1.53603e-08	1.58353e-10	2.09783	42.9014	90	306	0.031746	0.294118	region_101,region_102,region_107,region_108,region_109,region_110,region_1111,region_1150,region_1151,region_1152,region_1155,region_1156,region_1163,region_1164,region_1218,region_1219,region_1223,region_1250,region_1272,region_1282,region_1299,region_1300,region_1305,region_1306,region_1314,region_1316,region_1317,region_1318,region_134,region_1343,region_1344,region_1345,region_1349,region_139…	Adam9,Adra2a,Akt2,Angpt1,Angptl3,Anxa3,Arhgap5,Bbs4,Bcl2,Bmper,Bmpr2,Brca1,Camk1d,Ccl2,Cdh13,Cited2,Csf1,Cxcr4,Edn2,Edn3,Ednra,Epb4.1l5,Epha2,F3,Fert2,Fgf1,Fgr,Gata3,Hif1a,Igf1r,Itgb3,Jak2,Lama1,Lama4,Lamb1,Lef1,Mkks,Muc2,Nf1,Nog,Nr2e1,Ntn1,Onecut1,Pax6,Pdgfra,Pdpn,Pik3r1,Pitx2,Pla2g7,Plau,Plcb1,Pld1,Podxl,Ppap2b,Prkca,Prkx,Prox1,Pten,Ptk2b,Rap2a,Rap2b,Rapgef4,Rhoc,Ror2,Rras2,Rtn4,Sema3a,Sfrp1,Sf…
GO Biological Process	GO:0045892	negative regulation of transcription, DNA-dependent	146	4.71586e-06	0.0404762	0.000277235	1.33675	175.8	235	0.0837143	0.111905	161	6.00948e-09	5.15793e-05	3.20369e-07	1.56773	96.3179	151	687	0.0532628	0.219796	region_100,region_1008,region_1009,region_1010,region_1011,region_1012,region_1013,region_1014,region_1015,region_1016,region_1018,region_1020,region_1039,region_1045,region_1046,region_1059,region_1060,region_107,region_1070,region_108,region_109,region_1093,region_110,region_1105,region_1106,region_1123,region_1125,region_1153,region_1170,region_1171,region_1172,region_1189,region_1223,region_1…	1700071K01Rik,Atf7ip,Atxn1,Barx2,Bclaf1,Bcor,Bhlhe40,Bmp7,Brca1,C1d,Cited2,Ctbp2,Ctnnb1,Cux1,Dab2,Dap,Dlx2,Dmbx1,Ehmt1,Elk3,Ezh2,Fbxw11,Fezf1,Fezf2,Fgfr1,Foxb1,Foxc1,Foxd1,Foxd2,Foxd3,Foxi1,Foxi3,Foxj3,Foxk1,Foxn2,Foxn3,Foxo1,Foxo6,Foxp1,Fst,Fzd1,Gata3,Gata6,Gclc,Glis3,Glis3,Hdac2,Hdac9,Hes1,Hinfp,Hnf1b,Id2,Id3,Id4,Il4,Jarid2,Jazf1,Kdm1a,Khdrbs1,Klf12,Lcor,Lef1,Lgr4,Lmcd1,Lpin1,Mecom,Mospd1,Myc,M…
GO Biological Process	GO:0071844	cellular component assembly at cellular level	147	4.89037e-06	0.0419741	0.000285538	1.42677	115.646	165	0.0550694	0.0785714	611	0.00133351	1	0.0187324	1.30286	90.5697	118	646	0.0416226	0.182663	region_1008,region_1009,region_101,region_1010,region_1011,region_1016,region_1027,region_1052,region_1058,region_1059,region_107,region_108,region_1085,region_1086,region_109,region_110,region_1125,region_1132,region_1137,region_1150,region_1151,region_1152,region_1168,region_1180,region_1181,region_1182,region_1184,region_120,region_1210,region_1223,region_1248,region_127,region_1271,region_129…	Abl2,Actg1,Actn4,Ahctf1,Angpt1,Arhgap10,Arhgap26,Arhgap42,Asap1,Atg16l1,Atg5,Baiap2l1,Bbs10,Bbs4,Bcl2,Becn1,Cacna1a,Cadm1,Cadps,Cald1,Ccdc88a,Cd9,Cdh13,Cdh2,Celf4,Chaf1b,Chn2,Cox10,Cryaa,Ctnna1,Ctnnb1,Cul3,Dst,Dync2li1,Elp2,Fbln5,Fgd4,Fhad1,Foxp1,Gja10,Gm4906,H2afb1,H2afy2,H2afz,Hist1h2br,Hspa4,Hydin,Itgb3,Kif3a,Klf5,Lamc1,Lsm14a,Mbnl1,Mkks,Mtap1b,Mtss1,Myo7a,Myst4,Nap1l1,Ncor1,Ndufs4,Nefl,Nfasc,…
GO Biological Process	GO:0032879	regulation of localization	148	5.54062e-06	0.0475552	0.000321319	1.25964	269.918	340	0.128532	0.161905	64	5.00498e-15	4.29578e-11	6.71215e-13	1.60386	153.38	246	1094	0.0867725	0.224863	region_10,region_100,region_101,region_102,region_1020,region_1028,region_1029,region_103,region_1038,region_104,region_105,region_106,region_107,region_108,region_109,region_11,region_110,region_1110,region_1111,region_1117,region_1118,region_1120,region_1150,region_1151,region_1152,region_1154,region_1155,region_1156,region_1163,region_1164,region_1183,region_1200,region_1208,region_1209,region…	Aak1,Abcg8,Accn1,Actn4,Adam9,Adra2a,Ahcyl1,Akap1,Akt2,Angpt1,Angptl3,Anpep,Anxa2,Anxa3,Arfip1,Arg1,Arhgap5,Axin2,B4galt1,Bambi,Bard1,Bbs4,Bcl2,Bmper,Bmpr2,Brca1,Btn2a2,Cacna1a,Cacna1b,Cacna1e,Cacna2d1,Cacna2d3,Cacng3,Cacng5,Cadm1,Cadps,Camk1d,Camk2d,Cartpt,Casr,Cckar,Ccl2,Cd47,Cdh13,Cdh2,Chd7,Chrna7,Cited2,Clcn3,Clip3,Cnr1,Cnst,Cntf,Creb1,Cryaa,Csf1,Ctnnb1,Cxcr4,Dab2ip,Ddx58,Doc2b,Edn2,Edn3,Ednra…
GO Biological Process	GO:0048562	embryonic organ morphogenesis	149	6.38643e-06	0.0548148	0.000367884	1.57309	66.7476	105	0.0317846	0.05	146	1.32911e-09	1.14078e-05	7.81353e-08	2.13312	30.003	64	214	0.022575	0.299065	region_100,region_107,region_1071,region_1072,region_1073,region_1074,region_108,region_109,region_110,region_1105,region_1106,region_1141,region_1189,region_1215,region_1218,region_1219,region_1223,region_1255,region_1256,region_134,region_1360,region_1398,region_1409,region_1425,region_1426,region_1476,region_1494,region_1496,region_1528,region_1557,region_1558,region_1624,region_1625,region_16…	Aldh1a3,Atoh1,Bmp7,Cdh23,Chd7,Cited2,Cryaa,Dlg1,Dlx2,Dscaml1,Epha2,Eya1,Fgf3,Fgf9,Fgfr1,Foxi1,Foxi3,Fzd6,Gbx2,Gnas,Hlx,Hnf1b,Hoxc4,Id2,Mafb,Myc,Mycn,Myo7a,Ndst1,Neurod1,Neurog1,Nog,Osr1,Pax6,Pax8,Pdgfra,Pou4f3,Prox1,Prrx1,Rdh10,Ror2,Sall1,Satb2,Setd2,Shh,Smad2,Smad3,Sobp,Sod1,Sox11,Sox2,Sox9,Spry2,Tbx18,Tcf7,Tcf7l2,Tcfap2a,Tgfb2,Tgfbr2,Twist1,Wnt3,Wnt3a,Wnt5a,Zic1
GO Biological Process	GO:0031327	negative regulation of cellular biosynthetic process	150	6.40151e-06	0.0549442	0.000366294	1.31295	194.219	255	0.092485	0.121429	177	1.27137e-08	0.000109122	6.16508e-07	1.50814	112.721	170	804	0.0599647	0.211443	region_10,region_100,region_1008,region_1009,region_1010,region_1011,region_1012,region_1013,region_1014,region_1015,region_1016,region_1018,region_102,region_1020,region_1039,region_1045,region_1046,region_1050,region_1059,region_1060,region_107,region_1070,region_108,region_109,region_1093,region_11,region_110,region_1105,region_1106,region_1123,region_1125,region_1137,region_1153,region_1154,r…	1700071K01Rik,Acer2,Adra2a,Atf7ip,Atxn1,Barx2,Bclaf1,Bcor,Bhlhe40,Bmp7,Brca1,C1d,Cacna1a,Caprin2,Cd276,Cited2,Ctbp2,Ctnnb1,Cux1,Dab2,Dap,Dlx2,Dmbx1,Ednra,Ehmt1,Eif2c2,Eif4ebp1,Elk3,Enpp1,Ezh2,Fbxw11,Fbxw7,Fezf1,Fezf2,Fgf15,Fgfr1,Foxb1,Foxc1,Foxd1,Foxd2,Foxd3,Foxi1,Foxi3,Foxj3,Foxk1,Foxn2,Foxn3,Foxo1,Foxo6,Foxp1,Fst,Fzd1,Gata3,Gata6,Gclc,Glis3,Glis3,Grb10,Grm7,Hdac2,Hdac9,Hes1,Hinfp,Hnf1b,Id2,Id3,…
GO Biological Process	GO:0051276	chromosome organization	151	6.43201e-06	0.0552059	0.000365602	1.4647	96.9485	142	0.046166	0.067619	992	0.0123693	1	0.107022	1.23729	82.4381	102	588	0.0359788	0.173469	region_1012,region_1013,region_1014,region_1015,region_1016,region_102,region_103,region_104,region_107,region_1070,region_1071,region_1072,region_1073,region_108,region_109,region_110,region_1105,region_1106,region_1125,region_1190,region_1205,region_1206,region_1207,region_1223,region_1245,region_1246,region_1247,region_127,region_1284,region_1293,region_1316,region_1317,region_1318,region_1324…	1700071K01Rik,Arhgef10l,Asxl1,Axin2,Bcor,Bub3,Cdyl,Chaf1b,Chd1,Chd1l,Chd7,Chd9,Clock,Ddx11,Eed,Ehmt1,Elp4,Epc2,Ercc4,Eya1,Eya2,Eya3,Ezh2,Fbxo4,Fbxw7,Gm4906,Gm5136,Gpx4,H2afb1,H2afy2,H2afz,Hdac2,Hdac9,Hist1h2br,Hmgn3,Jak2,Jarid2,Kdm1a,Kdm5c,L3mbtl3,Lef1,Mad2l1,Map3k7,Mbip,Mcmbp,Mettl8,Mll5,Msh2,Msh6,Myst4,Nap1l1,Ncoa2,Ncoa3,Ncor1,Nsd1,Pinx1,Prdm5,Prdm9,Prkaa2,Prkca,Prkcb,Prmt7,Rad23b,Rag1,Rbl1,Rbl…
GO Biological Process	GO:0010001	glial cell differentiation	152	8.01845e-06	0.0688223	0.000452778	1.83798	33.1885	61	0.0158041	0.0290476	261	2.35689e-06	0.0202292	7.75064e-05	2.28521	14.4407	33	103	0.0116402	0.320388	region_1027,region_1028,region_1045,region_1046,region_107,region_108,region_109,region_110,region_1133,region_1144,region_1150,region_1151,region_1152,region_1168,region_1353,region_1425,region_1426,region_1466,region_1467,region_1528,region_1551,region_1680,region_1681,region_1682,region_1692,region_1702,region_1711,region_1712,region_1808,region_1809,region_1810,region_1811,region_1869,region_…	Bcl2,Bok,Cd9,Cntf,Cntn2,Ctnnb1,Dner,Egr2,Exoc4,Foxd1,Foxd2,Foxd3,Gap43,Id2,Id4,Nf1,Nfib,Nkx2-2,Nrg1,Ntf3,Pax6,Phox2b,Pou3f1,Rtn4,Shh,Sod1,Sox11,Sox4,Sox5,Sox6,Sox9,Tcf7l2,Vim
GO Biological Process	GO:0002376	immune system process	153	8.15005e-06	0.0699519	0.000457202	1.33445	169.358	226	0.0806468	0.107619	538	0.000657617	1	0.0104913	1.26221	133.892	169	955	0.059612	0.176963	region_100,region_1007,region_1008,region_1009,region_1010,region_1011,region_102,region_1053,region_1110,region_1114,region_1119,region_1123,region_1137,region_1150,region_1151,region_1152,region_1163,region_1164,region_1183,region_1194,region_1210,region_1218,region_1219,region_1228,region_1230,region_1231,region_1249,region_1251,region_1276,region_1277,region_1282,region_1298,region_1300,regio…	5830411N06Rik,Adam9,Ahctf1,Angpt1,Anxa3,Ap3b1,Ass1,B4galt1,BC096441,Bank1,Bcl2,Bcl2l11,Bdkrb2,Bnip3l,Bpgm,C8b,Calcoco2,Calcr,Ccl2,Cd180,Cd276,Cd28,Cd34,Cd47,Cd80,Cd86,Cdk13,Cdk6,Chd7,Chrna7,Cited2,Csf1,Ctla4,Ctnnb1,Cxcr4,Cyp19a1,Ddx58,Defb1,Dlg1,Dock2,Edn2,Edn3,Enpp1,Enpp3,Eomes,Epas1,Epha2,Fgf3,Fgr,Foxp1,Fst,Fzd5,Fzd7,Fzd9,Gadd45g,Gata3,Glrx5,Gpam,Gzmb,Hdac9,Hes1,Hif1a,Id2,Ifnar1,Ifng,Igf1r,Il12…
GO Biological Process	GO:0007049	cell cycle	154	8.28897e-06	0.0711442	0.000461975	1.37275	139.865	192	0.0666024	0.0914286	636	0.0016996	1	0.0229366	1.26024	114.264	144	815	0.0507937	0.176687	region_1,region_1019,region_1030,region_1058,region_1059,region_1071,region_1072,region_1073,region_1085,region_1086,region_1094,region_1110,region_1115,region_1126,region_113,region_1132,region_1150,region_1151,region_1152,region_1153,region_1154,region_1160,region_1161,region_1162,region_1210,region_1255,region_1256,region_1259,region_1276,region_1277,region_1284,region_1299,region_1312,region_…	1500015O10Rik,1700018B24Rik,2810021B07Rik,4930528F23Rik,Acvr1,Adcy3,Ahctf1,Anapc1,Anapc4,Apbb2,Arl8b,B230120H23Rik,Bbs4,Bcl2,Becn1,Brca1,Bub3,Camk2d,Ccnd2,Ccnh,Cdc123,Cdc25b,Cdc7,Cdca2,Cdh13,Cdk13,Cdk15,Cdk17,Cdk20,Cdk6,Cdkl1,Cdkl4,Cep164,Chaf1b,Clasp1,Cltc,Cryaa,Ctnnb1,Cul3,Cul4b,Cyp26b1,D7Ertd443e,Ddx11,Dst,E2f3,E2f8,Eif4ebp1,Ercc4,Esco1,Eya1,Ezh2,Fbxw11,Fbxw7,Foxn3,Gas2l3,Hinfp,Hormad2,Ick,Id4…
GO Biological Process	GO:0010646	regulation of cell communication	155	8.37601e-06	0.0718913	0.000463815	1.25649	265.819	334	0.126581	0.159048	74	2.30327e-14	1.97689e-10	2.67148e-12	1.58866	152.959	243	1091	0.0857143	0.222731	region_10,region_1018,region_102,region_1020,region_1025,region_1028,region_1029,region_103,region_1035,region_1036,region_1038,region_104,region_1050,region_1053,region_1069,region_107,region_1071,region_1072,region_1073,region_108,region_109,region_11,region_110,region_111,region_1111,region_1117,region_1118,region_1132,region_1137,region_1154,region_1165,region_1168,region_118,region_1183,regi…	1700071K01Rik,Aak1,Abra,Acvr1,Adnp,Adra2a,Adrb3,Akt2,Angpt1,Atxn1,Axin2,Bambi,Becn1,Bhlhe40,Bmp7,Bmper,Bmpr2,Cacna1a,Cacna1e,Caprin2,Cartpt,Cckar,Ccl2,Cd59a,Cdh13,Cdh2,Chd7,Chrna7,Cited2,Cnr1,Cntf,Cntn2,Creb1,Crhr2,Csf1,Ctnna1,Ctnnb1,Ctnnd2,Cul3,Cxxc4,Cyp7b1,Dab1,Dab2,Dab2ip,Ddit4l,Dgki,Dkk2,Doc2b,Dock2,Dusp10,Dusp16,Dusp4,Dusp6,Edn2,Edn3,Ednra,Egr2,Enpp1,Epha2,Esr2,Exoc4,Eya1,Ezh2,F3,Fbp1,Fbxw7,…
GO Biological Process	GO:0006325	chromatin organization	156	8.61957e-06	0.0739818	0.000474242	1.51775	77.7467	118	0.0370223	0.0561905	1090	0.0191834	1	0.151056	1.24707	65.7542	82	469	0.0289242	0.17484	region_1012,region_1013,region_1014,region_1015,region_1016,region_102,region_107,region_1070,region_1071,region_1072,region_1073,region_108,region_109,region_110,region_1105,region_1106,region_1125,region_1190,region_1205,region_1206,region_1207,region_1223,region_1245,region_1246,region_1247,region_127,region_1293,region_1316,region_1317,region_1318,region_1324,region_1354,region_1361,region_13…	1700071K01Rik,Arhgef10l,Asxl1,Bcor,Cdyl,Chaf1b,Chd1,Chd1l,Chd7,Chd9,Clock,Eed,Ehmt1,Elp4,Epc2,Eya1,Eya2,Eya3,Ezh2,Gm4906,Gm5136,Gpx4,H2afb1,H2afy2,H2afz,Hdac2,Hdac9,Hist1h2br,Hmgn3,Jak2,Jarid2,Kdm1a,Kdm5c,L3mbtl3,Lef1,Map3k7,Mbip,Mettl8,Mll5,Myst4,Nap1l1,Ncoa2,Ncoa3,Ncor1,Nsd1,Prdm5,Prdm9,Prkaa2,Prkca,Prkcb,Prmt7,Rag1,Rbl1,Rbl2,Rcor1,Rere,Rest,Rps6ka4,Rps6ka5,Rybp,Sall1,Satb1,Satb2,Scmh1,Setd1b,S…
GO Biological Process	GO:0021766	hippocampus development	157	9.38883e-06	0.0805843	0.000513276	2.39958	13.3356	32	0.00635031	0.0152381	367	8.38471e-05	0.719659	0.00196093	2.56775	7.01004	18	50	0.00634921	0.36	region_1038,region_1194,region_1316,region_1317,region_1318,region_1378,region_1379,region_1398,region_1409,region_1455,region_1566,region_1567,region_1568,region_160,region_161,region_166,region_2,region_2013,region_2014,region_2020,region_302,region_303,region_321,region_47,region_539,region_540,region_701,region_702,region_703,region_704,region_705,region_706	Anxa3,Bbs4,Cyp19a1,Dlx2,Fezf2,Grin2a,Grin2b,Hdac2,Id4,Lef1,Lmx1a,Mkks,Neurod1,Nr2e1,Ogdh,Srd5a1,Wnt3a,Zeb2
GO Biological Process	GO:0051234	establishment of localization	158	1.04158e-05	0.0893991	0.000565817	1.18217	450.866	533	0.214698	0.25381	821	0.00592249	1	0.0619157	1.11447	376.86	420	2688	0.148148	0.15625	region_10,region_100,region_1018,region_102,region_1024,region_1028,region_1038,region_1041,region_1047,region_1048,region_1049,region_105,region_1050,region_1054,region_1055,region_1056,region_1057,region_106,region_1069,region_107,region_1071,region_1072,region_1073,region_1074,region_1078,region_108,region_1080,region_1084,region_1085,region_1086,region_1088,region_109,region_1095,region_1096,…	1110021L09Rik,1190002N15Rik,2010107G12Rik,2510003E04Rik,5430435G22Rik,Aak1,Abca13,Abca4,Abcb5,Abcc2,Abcc4,Abcg8,Abra,Accn1,Actn4,Adm,Ahctf1,Ahcyl1,Ahi1,Aim2,Akt2,Ank,Ank3,Ano1,Ano4,Ano6,Anxa2,Anxa3,Ap3b1,Apba2,Aqp11,Aqp3,Arf1,Arfgap3,Arfip1,Arl4c,Armc1,Arntl,Atg10,Atg16l1,Atp10a,Atp10d,Atp11b,Atp12a,Atp1b3,Atp5g3,Atp6v0c,Atp6v1g3,Atp6v1h,Atp8a1,Atxn1,Bcap29,Bcl2,Bdkrb2,Bhlha15,Cacna1a,Cacna1b,Cac…
GO Biological Process	GO:0010721	negative regulation of cell development	159	1.07731e-05	0.0924655	0.000581544	1.91263	27.7105	53	0.0131955	0.0252381	170	8.69181e-09	7.46018e-05	4.38834e-07	2.67474	13.4593	36	96	0.0126984	0.375	region_100,region_1131,region_1282,region_1398,region_1494,region_1511,region_1530,region_1560,region_1578,region_1579,region_1634,region_166,region_1695,region_1696,region_1785,region_1855,region_1883,region_1968,region_1969,region_1970,region_1998,region_2066,region_2087,region_22,region_242,region_302,region_303,region_366,region_367,region_368,region_371,region_372,region_373,region_374,regio…	Bmp7,Ctnna1,Ctnnb1,Dab1,Dlx2,Epha4,Hes1,Id2,Id4,Ifng,Lrrk2,Mbp,Mycn,Nf1,Nog,Nr2e1,Nrp1,Ntn1,Ntrk3,Pcm1,Ptk2,Rest,Rtn4,Ryk,Sema3a,Sfrp1,Sfrp2,Sox11,Tgfbr3,Thy1,Ttpa,Ulk2,Wnt3,Wnt3a,Wnt5a,Ywhah
GO Biological Process	GO:0006629	lipid metabolic process	160	1.10948e-05	0.0952262	0.000595164	1.38492	128.527	178	0.0612035	0.0847619	566	0.000863549	1	0.0130951	1.28369	110.618	142	789	0.0500882	0.179975	region_1,region_1029,region_1039,region_1040,region_1042,region_1043,region_1044,region_1074,region_1122,region_1145,region_1170,region_1171,region_1172,region_1173,region_1192,region_1194,region_1201,region_1214,region_1224,region_1229,region_1244,region_1249,region_1250,region_1261,region_1274,region_1276,region_1281,region_1286,region_1294,region_1317,region_1318,region_1319,region_1320,region…	A4galt,Acer2,Acsl4,Adm,Adnp,Agpat3,Agpat4,Akr1d1,Aldh1a2,Aldh1a3,Aldh5a1,Aldh8a1,Angptl3,Aoah,Asah1,Brca1,Cds1,Cftr,Cln8,Col4a3bp,Cyb5r3,Cyp19a1,Cyp1b1,Cyp26a1,Cyp26b1,Cyp39a1,Cyp46a1,Cyp51,Cyp7b1,Dagla,Degs1,Degs2,Dhrs9,Dpm1,Echdc2,Edn2,Elovl5,Elovl7,Enpp6,Faah,Far1,Fgf23,Galc,Gata6,Gc,Gde1,Gdpd4,Ghr,Glt28d2,Gpam,Gpcpd1,Hadh,Hmgcr,Hps1,Hsd17b14,Il4,Ip6k1,Ip6k2,Iqcj-schip1,Kit,Lass6,Ldlrap1,Lpgat…
GO Biological Process	GO:0009890	negative regulation of biosynthetic process	161	1.13068e-05	0.0970459	0.00060277	1.30138	196.714	256	0.0936736	0.121905	188	2.66226e-08	0.000228501	1.21543e-06	1.49105	114.684	171	818	0.0603175	0.209046	region_10,region_100,region_1008,region_1009,region_1010,region_1011,region_1012,region_1013,region_1014,region_1015,region_1016,region_1018,region_102,region_1020,region_1039,region_1045,region_1046,region_1050,region_1059,region_1060,region_107,region_1070,region_108,region_109,region_1093,region_11,region_110,region_1105,region_1106,region_1123,region_1125,region_1137,region_1153,region_1154,r…	1700071K01Rik,Acer2,Adra2a,Atf7ip,Atxn1,Barx2,Bclaf1,Bcor,Bhlhe40,Bmp7,Brca1,C1d,Cacna1a,Caprin2,Cd276,Cited2,Ctbp2,Ctnnb1,Cux1,Dab2,Dap,Dlx2,Dmbx1,Ednra,Ehmt1,Eif2c2,Eif4ebp1,Elk3,Enpp1,Ezh2,Fbxw11,Fbxw7,Fezf1,Fezf2,Fgf15,Fgfr1,Foxb1,Foxc1,Foxd1,Foxd2,Foxd3,Foxi1,Foxi3,Foxj3,Foxk1,Foxn2,Foxn3,Foxo1,Foxo6,Foxp1,Fst,Fzd1,Gata3,Gata6,Gclc,Glis3,Glis3,Grb10,Grm7,Hdac2,Hdac9,Hes1,Hinfp,Hnf1b,Id2,Id3,…
GO Biological Process	GO:0006796	phosphate-containing compound metabolic process	162	1.14087e-05	0.097921	0.000604451	1.27959	223.509	286	0.106433	0.13619	215	1.4065e-07	0.0012072	5.61488e-06	1.38516	159.548	221	1138	0.0779541	0.1942	region_0,region_1,region_102,region_1029,region_1035,region_1036,region_1040,region_105,region_107,region_1071,region_1072,region_1073,region_108,region_1087,region_109,region_110,region_1101,region_1110,region_1111,region_1116,region_1117,region_1118,region_1131,region_1137,region_1150,region_1151,region_1152,region_1157,region_1159,region_1165,region_1174,region_1176,region_1184,region_1191,reg…	1110020G09Rik,6430598A04Rik,Aak1,Abl2,Acvr1,Adam9,Adra2a,Akap1,Akap2,Akap7,Akt2,B230120H23Rik,Bcl2,Bmp2k,Bmp7,Bmpr2,Camk1d,Camk1g,Camk2d,Cartpt,Ccnh,Cdc25b,Cdc7,Cdk13,Cdk15,Cdk17,Cdk20,Cdk6,Cdkl1,Cdkl4,Cmpk2,Col4a3bp,Coq7,Creb1,Csnk1g3,Csnk2a2,Ctdspl,D8Ertd82e,Dclk2,Ddr1,Dgkg,Dscaml1,Dupd1,Dusp10,Dusp16,Dusp26,Dusp4,Dusp6,Dyrk2,Eef2k,Eif2ak2,Enpp1,Enpp3,Epha2,Epha4,Epha7,Epm2a,Eya1,Eya2,Eya3,Fast…
GO Biological Process	GO:0006810	transport	163	1.19962e-05	0.102963	0.000631678	1.18368	440.154	521	0.209597	0.248095	866	0.00777166	1	0.0770256	1.11126	369.85	411	2638	0.144974	0.1558	region_10,region_100,region_1018,region_102,region_1024,region_1028,region_1038,region_1041,region_1047,region_1048,region_1049,region_105,region_1050,region_1054,region_1055,region_1056,region_1057,region_106,region_1069,region_107,region_1074,region_1078,region_108,region_1080,region_1084,region_1085,region_1086,region_1088,region_109,region_1095,region_1096,region_1097,region_11,region_110,reg…	1110021L09Rik,1190002N15Rik,2010107G12Rik,2510003E04Rik,5430435G22Rik,Aak1,Abca13,Abca4,Abcb5,Abcc2,Abcc4,Abcg8,Abra,Accn1,Actn4,Adm,Ahctf1,Ahcyl1,Ahi1,Aim2,Akt2,Ank,Ano1,Ano4,Ano6,Anxa2,Anxa3,Ap3b1,Apba2,Aqp11,Aqp3,Arf1,Arfgap3,Arfip1,Arl4c,Armc1,Arntl,Atg10,Atg16l1,Atp10a,Atp10d,Atp11b,Atp12a,Atp1b3,Atp5g3,Atp6v0c,Atp6v1g3,Atp6v1h,Atp8a1,Atxn1,Bcap29,Bcl2,Bdkrb2,Bhlha15,Cacna1a,Cacna1b,Cacna1e,…
GO Biological Process	GO:0030099	myeloid cell differentiation	164	1.21067e-05	0.103912	0.000633609	1.9317	26.4016	51	0.0125722	0.0242857	568	0.000872999	1	0.0131918	1.75572	18.2261	32	130	0.0112875	0.246154	region_1007,region_1053,region_1300,region_1316,region_1317,region_1318,region_1322,region_134,region_1349,region_1415,region_1416,region_1450,region_1451,region_1452,region_1453,region_1520,region_1521,region_1557,region_1558,region_1578,region_1579,region_166,region_1731,region_1737,region_1808,region_1809,region_1810,region_1811,region_2013,region_2014,region_2060,region_2081,region_2087,regio…	Bpgm,Calcr,Cited2,Csf1,Ctnnb1,Cyp19a1,Epas1,Epha2,Gata3,Jak2,Kdm1a,Kit,Lef1,Mb,Mitf,Mll5,Ncor1,Ostm1,Plcb1,Plscr1,Prkx,Rcor1,Sfxn1,Sox6,Tcea1,Tet2,Tgfbr2,Tgfbr3,Tm7sf4,Tnfsf11,Traf6,Vegfa
GO Biological Process	GO:0051130	positive regulation of cellular component organization	165	1.31351e-05	0.112739	0.000683265	1.4835	84.2604	125	0.040124	0.0595238	319	2.52114e-05	0.216389	0.000678336	1.55726	52.0145	81	371	0.0285714	0.218329	region_100,region_102,region_103,region_104,region_1050,region_1114,region_1155,region_1156,region_1184,region_1223,region_1248,region_1297,region_1299,region_1316,region_1317,region_1318,region_1343,region_1344,region_1345,region_1351,region_1360,region_1441,region_1442,region_1459,region_1468,region_1469,region_1484,region_1485,region_1497,region_1498,region_1499,region_1588,region_1616,region_…	A930038C07Rik,Abl2,Accn1,Actn4,Adam9,Adnp,Angpt1,Anxa2,Axin2,Baiap2l1,Bambi,Bbs4,Bcl2l11,Brca1,Camk1d,Cand1,Caprin2,Cd28,Cd47,Cdh4,Clip3,Cnr1,Cntf,Ctnnb1,Dlg1,Doc2b,Dstn,Edn3,Epb4.1l5,Epha2,Evl,Faf1,Fert2,Fgfr1,Gdnf,Hnf1b,Jarid2,Ldlrap1,Lef1,Lpin1,Mark2,Mtap1b,Ncor1,Nefl,Ngf,Nlgn1,Npm1,Nptn,Nrxn1,Ntn1,Ntrk3,ORF19,Pax8,Pink1,Prkca,Prkcq,Prox1,Pten,Ptk2b,Rala,Rhoc,Rictor,Robo1,Rps6ka4,Rps6ka5,Smad2…
GO Biological Process	GO:0016331	morphogenesis of embryonic epithelium	166	1.31621e-05	0.11297	0.000680541	1.71349	42.0195	72	0.0200093	0.0342857	122	8.7339e-11	7.49631e-07	6.14452e-09	2.66749	17.2447	46	123	0.0162258	0.373984	region_107,region_1074,region_108,region_109,region_110,region_1155,region_1156,region_12,region_1212,region_1213,region_1282,region_1331,region_1332,region_134,region_1349,region_1360,region_1378,region_1379,region_1415,region_1416,region_1528,region_1564,region_1639,region_1640,region_1776,region_1782,region_1803,region_1813,region_1855,region_1926,region_1927,region_1931,region_1932,region_193…	Adm,Aldh1a2,Aldh1a3,Bbs4,Cited2,Cobl,Coq7,Ctnnb1,Enah,Epb4.1l5,Fzd6,Gata3,Gdnf,Hectd1,Hif1a,Hnf1b,Hs2st1,Irx1,Irx3,Lmo4,Map3k7,Nog,Opa1,Osr1,Pax8,Rdh10,Rgma,Sall1,Setd2,Sfrp1,Sfrp2,Shh,Shroom3,Sox11,Sox4,Sox9,Stk3,Sufu,Tbx18,Tcfap2a,Tgif1,Traf6,Twist1,Wnt5a,Zeb2,Zic5
GO Biological Process	GO:0016568	chromatin modification	167	1.33583e-05	0.114654	0.000686552	1.54831	67.1699	104	0.0319857	0.0495238	593	0.0011083	1	0.0160414	1.43061	48.9301	70	349	0.0246914	0.200573	region_1012,region_1013,region_1014,region_1015,region_1016,region_102,region_107,region_1070,region_1071,region_1072,region_1073,region_108,region_109,region_110,region_1105,region_1106,region_1125,region_1190,region_1205,region_1206,region_1207,region_1223,region_1245,region_1246,region_1247,region_1293,region_1316,region_1317,region_1318,region_1361,region_1380,region_1396,region_1397,region_1…	1700071K01Rik,Arhgef10l,Asxl1,Bcor,Cdyl,Chd1,Chd1l,Chd7,Chd9,Clock,Eed,Ehmt1,Elp4,Epc2,Eya1,Eya2,Eya3,Ezh2,Gm5136,Hdac2,Hdac9,Hmgn3,Jak2,Jarid2,Kdm1a,Kdm5c,L3mbtl3,Lef1,Map3k7,Mbip,Mettl8,Mll5,Myst4,Ncoa2,Ncoa3,Ncor1,Nsd1,Prdm5,Prdm9,Prkaa2,Prkca,Prkcb,Prmt7,Rag1,Rbl1,Rbl2,Rcor1,Rere,Rest,Rps6ka4,Rps6ka5,Rybp,Sall1,Satb1,Satb2,Scmh1,Setd1b,Setd2,Sirt1,Smyd2,Smyd3,Sox9,Suz12,Tada1,Tbl1xr1,Tlk1,Tnp…
GO Biological Process	GO:0030334	regulation of cell migration	168	1.37792e-05	0.118267	0.000703971	1.47669	86.0032	127	0.0409539	0.0604762	108	9.35023e-12	8.0253e-08	7.43083e-10	2.07934	41.3592	86	295	0.0303351	0.291525	region_101,region_102,region_107,region_108,region_109,region_110,region_1111,region_1150,region_1151,region_1152,region_1155,region_1156,region_1163,region_1164,region_1218,region_1219,region_1223,region_1250,region_1272,region_1282,region_1299,region_1300,region_1305,region_1306,region_1314,region_1316,region_1317,region_1318,region_134,region_1343,region_1344,region_1345,region_1349,region_139…	Adam9,Adra2a,Akt2,Angpt1,Angptl3,Anxa3,Arhgap5,Bcl2,Bmper,Bmpr2,Camk1d,Ccl2,Cdh13,Cited2,Csf1,Cxcr4,Edn2,Edn3,Ednra,Epb4.1l5,Epha2,F3,Fert2,Fgf1,Fgr,Gata3,Hif1a,Igf1r,Itgb3,Jak2,Lama1,Lama4,Lamb1,Lef1,Muc2,Nf1,Nog,Nr2e1,Ntn1,Onecut1,Pax6,Pdgfra,Pdpn,Pik3r1,Pitx2,Pla2g7,Plau,Plcb1,Pld1,Podxl,Ppap2b,Prkca,Prkx,Prox1,Pten,Ptk2b,Rap2a,Rap2b,Rapgef4,Rhoc,Ror2,Rras2,Rtn4,Sema3a,Sfrp1,Sfrp2,Shh,Smad3,So…
GO Biological Process	GO:0009719	response to endogenous stimulus	169	1.51973e-05	0.130438	0.000771825	1.32723	165.759	220	0.078933	0.104762	186	2.41839e-08	0.000207571	1.11597e-06	1.52701	101.505	155	724	0.0546737	0.214088	region_102,region_1029,region_1030,region_1038,region_1045,region_1046,region_107,region_1076,region_1077,region_108,region_109,region_1095,region_110,region_1124,region_1147,region_1148,region_1150,region_1151,region_1152,region_1154,region_1155,region_1156,region_1170,region_1171,region_1172,region_1173,region_118,region_1188,region_119,region_1193,region_1218,region_1219,region_1222,region_124…	Acvr1,Adam9,Adm,Adra2a,Agl,Akap1,Akt2,Aldh1a2,Aldh3a1,Angpt1,Angptl3,Anxa3,Arg1,Asns,Ass1,Bckdhb,Bcl2,Bdh1,Bmp7,Brca1,Btg1,Cacybp,Car2,Cckar,Ccl2,Ccnd2,Cdh13,Cftr,Cga,Cited2,Col3a1,Ctgf,Ctnna1,Ctnnb1,Ctsl,Cyp19a1,Cyp2c44,Dab2ip,Defb1,Egr2,Eif4ebp1,Enpp1,Epb4.1l5,Esr2,Esrrb,Esrrg,F3,Fbp1,Fgf1,Fgf15,Fgf18,Fgf23,Fgf3,Fgf9,Fgfr1,Foxo1,Foxo6,Fzd1,Gal,Gata6,Gc,Gclc,Ggh,Ghr,Gnao1,Gpam,Gprc6a,Grb14,Grik4…
GO Biological Process	GO:0009611	response to wounding	170	1.52558e-05	0.130941	0.000770239	1.43666	99.5366	143	0.0473984	0.0680952	476	0.000352649	1	0.00635879	1.38767	72.0632	100	514	0.0352734	0.194552	region_1023,region_1076,region_1077,region_1085,region_1086,region_1095,region_111,region_1110,region_1150,region_1151,region_1152,region_1191,region_1192,region_1218,region_1219,region_1251,region_1255,region_1256,region_1261,region_1270,region_1271,region_1297,region_1305,region_1306,region_1343,region_1344,region_1345,region_1349,region_1351,region_1362,region_138,region_1385,region_1400,regio…	Acvr1,Adm,Ap3b1,Arg1,Arhgef19,Ass1,B4galt1,Bcl2,Bdkrb2,Camk1d,Ccl2,Cd180,Col3a1,Ctnna1,Defb1,Dsp,Dst,Dtnbp1,Dysf,Elk3,Entpd2,Evl,F11,F2rl2,F2rl3,F3,Fhad1,Fzd6,Fzd7,Gal,Gap43,Gata3,Grin2a,Grin2c,Hdac9,Hif1a,Hps1,Hrh4,Id3,Igsf10,Il15,Il17a,Il17f,Ina,Jak2,Kl,Klf6,Lnp,Ltc4s,Ly86,Lyst,Max,Mecom,Mecom,Mertk,Mgst2,Mgst3,Mtap1b,Mtpn,Myof,Ndst1,Nefl,Nf1,Ngf,Ninj2,Nog,Notch3,Nrp1,Ntrk3,P2ry1,P2ry12,Pdgfra,…
GO Biological Process	GO:0030182	neuron differentiation	171	1.57898e-05	0.135524	0.000792536	1.29654	195.906	254	0.0932887	0.120952	17	2.58939e-23	2.22248e-19	1.30734e-20	2.12859	80.335	171	573	0.0603175	0.298429	region_100,region_1008,region_1009,region_1010,region_1011,region_1017,region_102,region_1028,region_1045,region_1046,region_1052,region_107,region_108,region_1088,region_109,region_110,region_1110,region_1112,region_1113,region_1115,region_1116,region_1117,region_1118,region_1119,region_1131,region_1141,region_1150,region_1151,region_1152,region_1163,region_1164,region_1168,region_1180,region_11…	Abi2,Acsl4,Actg1,Adcy1,Adm,Agtpbp1,Aldh1a2,Ank3,Apbb2,Atl1,Atoh1,B3gnt2,Bbs4,Bcl2,Bmp7,Boc,Cacna1a,Cckar,Cdh23,Cdh4,Cln8,Cnga3,Cntf,Cntn2,Cntn4,Creb1,Ctnna1,Cux1,Cxcr4,Dab1,Dbx1,Dgkg,Dlx2,Dscaml1,Dtnbp1,Edn3,Egr2,Emx1,En2,Enah,Eomes,Epha2,Epha4,Epha7,Etv1,Evl,Evx1,Ext1,Fezf1,Fezf2,Fgfr1,Foxb1,Foxd1,Foxd2,Foxd3,Foxp1,Fzd1,Fzd5,Fzd6,Fzd7,Gabrb3,Gap43,Gbx2,Gdnf,Gnao1,Grin3a,Hcn1,Hdac2,Hes1,Id2,Id3,I…
GO Biological Process	GO:0001101	response to acid	172	1.70248e-05	0.146124	0.000849556	1.95011	24.614	48	0.0117209	0.0228571	913	0.00970112	1	0.091199	1.66934	13.1789	22	94	0.00776014	0.234043	region_1038,region_1095,region_1150,region_1151,region_1152,region_118,region_119,region_1299,region_147,region_149,region_150,region_151,region_1557,region_1558,region_176,region_183,region_1833,region_1834,region_1835,region_1836,region_1936,region_1937,region_2031,region_2032,region_208,region_209,region_342,region_343,region_691,region_701,region_702,region_703,region_704,region_705,region_70…	Accn1,Anxa2,Arg1,Asns,Ass1,Bcl2,Ccl2,Col3a1,Ctgf,Gprc6a,Grin2a,Grin2b,Mgmt,Mmp2,Msh2,Nrf1,Pdgfra,Pik3c3,Pik3r1,Rhoc,Rptor,Timp3
GO Biological Process	GO:0008284	positive regulation of cell proliferation	173	1.75978e-05	0.151042	0.000873075	1.35859	139.115	189	0.0662453	0.09	147	1.45768e-09	1.25113e-05	8.51108e-08	1.69626	71.923	122	513	0.0430335	0.237817	region_100,region_1008,region_1009,region_101,region_1010,region_1011,region_102,region_1025,region_1030,region_1042,region_1043,region_1044,region_107,region_1071,region_1072,region_1073,region_108,region_109,region_1093,region_110,region_1110,region_1111,region_1114,region_1124,region_1150,region_1151,region_1152,region_118,region_1189,region_119,region_1194,region_1215,region_1218,region_1219,…	Acer2,Adm,Aldh1a2,Aldh3a1,Arg1,Arhgap5,B4galt1,BC096441,Bambi,Bcl2,Bmpr2,Ccl2,Ccnd2,Cd276,Cd28,Cd47,Cd80,Cdc7,Cdca7l,Cdh13,Cdk6,Cntf,Csf1,Ctgf,Ctnnb1,Cyp7b1,Dlg1,E2f3,Edn2,Edn3,Ednra,Epcam,Etv5,Eya1,F3,Fgf1,Fgf15,Fgf18,Fgf3,Fgf9,Fgfr1,Foxp1,Fzd7,Gata6,Gpam,Hdac2,Hes1,Hif1a,Hlx,Id2,Id4,Ifng,Igfbp2,Il12a,Il15,Il4,Il7,Itgb3,Jak2,Kitl,Klf5,Lef1,Lifr,Mab21l2,Myc,Mycn,Nampt,Nanogpd,Ndufs4,Nf1,Ngf,Nog,N…
GO Biological Process	GO:0051246	regulation of protein metabolic process	174	1.80124e-05	0.154601	0.000888509	1.28869	202.531	261	0.0964432	0.124286	254	1.72486e-06	0.0148045	5.82854e-05	1.3648	145.809	199	1040	0.070194	0.191346	region_102,region_103,region_1030,region_1035,region_1036,region_104,region_105,region_1050,region_1058,region_1059,region_107,region_1076,region_1077,region_108,region_1084,region_109,region_110,region_111,region_1111,region_1114,region_1119,region_113,region_1131,region_1137,region_114,region_1154,region_1159,region_1168,region_118,region_119,region_1213,region_1215,region_1223,region_1228,regi…	5033414D02Rik,Acer2,Aco1,Adam9,Adnp,Adra2a,Akap1,Akt2,Angpt1,Arntl,Atg10,Atg5,Axin2,B230120H23Rik,Bcor,Bdkrb2,Bmp7,Bmper,Bmpr2,Brca1,Caprin2,Cartpt,Ccdc88a,Ccnd2,Ccnh,Ccnl1,Ccnt2,Ccnyl1,Cd276,Cd28,Cd46,Cd59a,Cd80,Cdc25b,Chordc1,Clip3,Cntf,Cntn2,Cryaa,Csf1,Ctgf,Cul4b,Dab1,Dab2,Dab2ip,Dgkg,Dgki,Dlg1,Dusp10,Dusp16,Dusp4,Dusp6,Edn2,Edn3,Ednra,Eef2k,Eif2c2,Eif3k,Eif4e,Eif4ebp1,Enpp1,Epha4,Epha7,Ezh2,F…
GO Biological Process	GO:0071347	cellular response to interleukin-1	175	1.8257e-05	0.1567	0.000895428	3.14895	6.03375	19	0.00287321	0.00904762	1329	0.0341213	1	0.220364	2.03789	3.92562	8	28	0.00282187	0.285714	region_107,region_1076,region_1077,region_108,region_109,region_110,region_1415,region_1416,region_1450,region_1451,region_1452,region_1453,region_1855,region_429,region_777,region_78,region_79,region_80,region_81	Ccl2,Il17a,Plcb1,Rps6ka4,Rps6ka5,Sfrp1,Sox9,Traf6
GO Biological Process	GO:0008285	negative regulation of cell proliferation	176	1.84306e-05	0.15819	0.000898804	1.42108	104.147	148	0.0495936	0.0704762	205	9.17201e-08	0.000787233	3.84016e-06	1.71332	53.6969	92	383	0.0324515	0.240209	region_102,region_1026,region_1027,region_103,region_104,region_107,region_108,region_109,region_110,region_1114,region_1119,region_1137,region_1150,region_1151,region_1152,region_1218,region_1219,region_1223,region_1255,region_1256,region_1276,region_1277,region_1282,region_1284,region_1349,region_1371,region_1372,region_138,region_1425,region_1426,region_1471,region_1494,region_1504,region_1505…	1700071K01Rik,Adm,Aldh1a2,Axin2,B4galt1,Bcl2,Bdkrb2,Becn1,Bmp7,Btg1,Btn2a2,Cd276,Cd9,Cdh13,Cdk6,Ctla4,Ctnna1,Ctnnb1,Dab2ip,Ddr1,Dlg1,Eif2ak2,Esr2,Fbxw7,Fezf1,Fezf2,Foxo6,Fzd5,Gal,Gata3,Hes1,Id2,Ifng,Il12a,Il15,Inpp5d,Itch,Jak2,Jarid2,Klf13,Leprel2,Lrrk2,Mtss1,Muc2,Ndfip1,Nf1,Nfib,Nog,Npm1,Nr2e1,Pawr,Pax6,Phox2b,Pik3r1,Pmp22,Prdm1,Prkca,Prox1,Pten,Pth1r,Rbpj,Rest,Robo1,Ror2,Sfrp1,Sfrp2,Shh,Skap2,S…
GO Biological Process	GO:0043009	chordate embryonic development	177	1.85427e-05	0.159152	0.000899161	1.36914	131.469	180	0.0626045	0.0857143	125	9.93823e-11	8.52999e-07	6.82399e-09	1.74846	72.0632	126	514	0.0444444	0.245136	region_100,region_1008,region_1009,region_1010,region_1011,region_103,region_1038,region_104,region_1045,region_1046,region_1071,region_1072,region_1073,region_1074,region_1105,region_1106,region_1119,region_1132,region_1141,region_1155,region_1156,region_1189,region_1194,region_12,region_1212,region_1213,region_1218,region_1219,region_1227,region_1251,region_1271,region_1282,region_1314,region_1…	Acvr1,Adm,Aldh1a2,Angpt1,Apba2,Axin2,Bbs4,Bcl2l11,Bmp7,Brca1,Chd7,Cited2,Cobl,Col4a3bp,Coq7,Ctnnb1,Cul3,Dab2,Dlg1,Dlx2,Dscaml1,Ednra,Enah,Eomes,Epas1,Epb4.1l5,Epha2,Esrrb,Etl4,Eya1,Fgf9,Fgfr1,Foxb1,Foxc1,Foxd3,Foxp1,Fzd5,Fzd6,Gata3,Gata6,Gbx2,Gnas,Grin2b,Hectd1,Hes1,Hif1a,Hinfp,Hnf1b,Kdm1a,Kif3a,Lef1,Lmo4,Man2a1,Map3k7,Mbnl1,Mecom,Mecom,Mesp2,Mkl2,Msh2,Myb,Mycn,Myo1e,Ndst1,Nf1,Nog,Opa1,Osr1,Pax1,…
GO Biological Process	GO:0031329	regulation of cellular catabolic process	178	1.95086e-05	0.167442	0.000940686	1.43126	99.2132	142	0.0472444	0.067619	180	1.7175e-08	0.000147413	8.18961e-07	1.71587	59.4451	102	424	0.0359788	0.240566	region_101,region_1022,region_1027,region_103,region_104,region_1053,region_1058,region_1059,region_1066,region_1067,region_1131,region_1136,region_1165,region_1203,region_1216,region_1217,region_122,region_1278,region_1279,region_1280,region_1284,region_1301,region_1307,region_1308,region_1356,region_1357,region_1371,region_1372,region_1375,region_1376,region_138,region_1450,region_1451,region_1…	Acap2,Adam9,Adra2a,Agfg2,Akt2,Arfgap3,Arhgap10,Arhgap15,Arhgap18,Arhgap21,Arhgap24,Arhgap25,Arhgap26,Arhgap28,Arhgap29,Arhgap32,Arhgap42,Arhgap5,Arhgef19,Asap1,Axin2,Becn1,Casr,Chn2,Cnr1,Dab2,Dab2ip,Dap,Depdc1b,Dgki,Dock2,Dock4,Epha2,Epha4,Fam13b,Fbp1,Fbxo22,Fbxw7,Gclc,Gnao1,Hif1a,Ier3,Ifng,Iqgap1,Iqgap2,Lrrk2,Mad2l1,Myl4,Mylip,N4bp1,Ncor1,Nf1,Oxa1l,Park2,Pde6d,Plcb1,Plekhg6,Plscr1,Ppp1cb,Ppp1r3c…
[truncated: 6,362 more rows]

## Sheet: SOX2 ESC Active Enhancers
# Ontology	ID	Desc	BinomRank	BinomP	BinomBonfP	BinomFdrQ	RegionFoldEnrich	ExpRegions	ObsRegions	GenomeFrac	SetCov	HyperRank	HyperP	HyperBonfP	HyperFdrQ	GeneFoldEnrich	ExpGenes	ObsGenes	TotalGenes	GeneSetCov	TermCov	Regions	Genes
[truncated: 7,077 more rows]
