# Supplementary material for: SOX2 Co-Occupies Distal Enhancer Elements with Distinct POU Factors in ESCs and NPCs to Specify Cell State
Source: PLoS Genet. 2013 Feb 21;9(2):e1003288. doi: 10.1371/journal.pgen.1003288 (PMC3578749; doi:10.1371/journal.pgen.1003288)
Supplement: Table S10 — Hypothesis-driven motif search in SOX2-BRN2-co-bound regions in NPCs. Mann-Whitney U test and THEME results for TRANSFAC motifs enriched in SOX2-BRN2 regions in NPCs. (XLSX) [file pgen.1003288.s015.xlsx]

## Sheet: Key
Table S10
Mann-Whitney U test and THEME results for TRANSFAC motifs enriched in SOX2-BRN2 regions in NPCs.
Referred to in Figure 6.
Similar motifs were grouped and the p-value of highest scoring motif within group was listed.
DE Factors tab conatins Affymetrix gene expression values of RFX and NFI factors which are minimum 1.5 fold differentially expressed with and FDR less than .05 between ESCs and NPCs
Column in MWW tab	Description
min P-value	Minimum p-value achieved by best motif within the cluster in that row
z1	z-score of U-value in background
z2	z-score of U-value in foreground
U1	Mann-Whitney U rank for motif in background dataset
U2	Mann-Whitney U rank for motif in foreground dataset
AUC1	Area-under-the-curve for the receiver operating characteristics based on the Mann-Whitney ranks for background
AUC2	Area-under-the-curve for the receiver operating characteristics based on the Mann-Whitney ranks for foreground
Column in THEME tab	Description
min P-value	Minimum p-value achieved by any motif within the motif cluster in that row
CV Error	5 fold cross validation error of the most significant motif
Unrefined Hypothesis	Native TRANSFAC position weight matrix before refinement in that row
Refined Hypothesis	TRANSFAC position weight matrix after refinement
PWM threshold	Position weight matrix score threshold chosen by the SVM classifier

## Sheet: SOX2-BRN2 TRANSFAC Motifs MWW
Motifs	min P-value	z1	z2	U1	U2	AUC1	AUC2
Oct-2(M01368), Oct-1(M00135), Oct-1(M00161), OCT-x(M00210), Oct-1(M00248), Oct-1(M00342), POU2F3(M01476), POU3F2(M00464)	1.2792e-64	-17.3304	17.2993	762660	1620504	0.319916	0.67976
Octamer(M00795), Oct-1(M00138), Oct-1(M00162), Oct-1(M00195), Oct-1(M00930)	1.2792e-64	-17.3186	17.2874	762954	1620209	0.32004	0.679636
SOX4(M01308), SOX5(M00042), SOX2(M01272), SRY(M00160), SOX9(M00410)	5.5561e-55	-15.9172	15.886	797695	1585469	0.334613	0.665064
NF-1(M00193), CTF1(M01196), NF-1(M00806)	1.7998e-45	-14.4195	14.3884	834770	1548393	0.350165	0.649511
Oct-4(M01125), Nanog(M01247), SMAD1(M01590), TCF-3(M01594), SOX(M01014), Oct-4(M01124)	6.8375e-43	-13.9797	13.9485	845669	1537495	0.354736	0.64494
Octamer(M01324)	8.3365e-39	-13.2834	13.2522	862914	1520250	0.36197	0.637706
HOXA3(M01337), HOXC-8(M01321), HoxB5(M01319), GSH2(M01326), HOXD3(M01338), dlx5(M01388), HOXA6(M01392), Vax-1(M01397), dlx3(M01400), HoxA2(M01402), Barx1(M01340), ipf1(M01438), Dlx-1(M01439), Bsx(M01442), Mox1(M01443), HOXD1(M01448), HOXA5(M01452), HOXB6(M01460), Dlx-2(M01468), Dlx7(M01486), HOXA1(M01487)	7.8546e-32	-12.0123	11.9811	894403	1488760	0.375179	0.624497
HOXB4(M01424), Prop-1(M01320), OTP(M01323), Vsx1(M01335), HOXA7(M01336), Lhx5(M01353), PMX2B(M01356), lmx1b(M01363), Lhx9(M01367), HOXC4(M01369), HOXA4(M01370), Lmx-1(M01409), Alx-4(M01417), Lim-1(M01418), OG-2(M01441), HOXC5(M01454), Uncx-4.1(M01458), Lhx3(M01471), Octamer(M01477), NKX6.1(M01489)	4.5203e-30	-11.6554	11.6242	903245	1479919	0.378888	0.620788
Oct-1(M00136), Oct-2(M01761)	8.0105e-30	-11.5991	11.5679	904638	1478525	0.379473	0.620204
LBP-1(M00644), HEB(M00698)	6.2958e-28	-11.1997	11.1685	914889	1468274	0.383773	0.615903
Nkx6-3(M01470), Brn-2(M00145), Oct-6(M01316), Oct-1(M01354), Dbx-2(M01360), pax6(M01391), Brn-3c(M01408), Shox2(M01415), Barx-2(M01431), Pit-1(M01465), NKX6.1(M01469), Brn-4(M01473), LHX3b(M01971)	1.9693e-26	-10.879	10.8479	922475	1460689	0.386955	0.612722
Vax-2(M01327), HOXB3(M01330), isx(M01331), Nkx1-1(M01334), HB9(M01349), Gbx1(M01371), rax(M01389), Msx-2(M01393), Lbx2(M01401), Msx-1(M01412), Nkx1-2(M01427), En-2(M01455), EMX2(M01461), Evx-1(M01475), Gbx2(M01382)	8.8251e-26	-10.7362	10.705	926014	1457149	0.388439	0.611237
CHX10(M00437), OG-2(M01162), Nkx2-5(M00241)	3.9426e-25	-10.592	10.5608	929585	1453578	0.389937	0.609739
IPF1(M01236), IPF1(M00436), IPF1(M01255), IPF1(M01013)	1.1397e-23	-10.2582	10.2271	937940	1445224	0.393442	0.606234
S8(M00099), Barhl-1(M01332), En-1(M01365)	2.7173e-23	-10.1718	10.1406	939992	1443171	0.394303	0.605373
NeuroD(M01288), AP-4(M00175), AP-4(M00176), AP-4(M00927)	4.7741e-23	-10.1146	10.0835	941410	1441753	0.394898	0.604779
SOX9(M01284)	1.8414e-22	-9.9694	9.93823	945012	1438151	0.396409	0.603268
PMX2A(M01444), lhx6.1(M01314), LH-2(M01325), Pax-7(M01339), K-2b(M01348), ALX-3(M01355), CART1(M01362), S8(M01376), Pax-4(M01385), Evx2(M01386), Lhx4(M01421), lhx6.1(M01422), Arx(M01423), Lhx8(M01440), CART1(M01453), Esx1(M01474)	1.4454e-21	-9.74812	9.71695	950490	1432674	0.398706	0.60097
LEF-1(M02019), LEF1(M00805), TCF-4(M02033)	8.6179e-21	-9.55373	9.52255	955417	1427747	0.400773	0.598903
POU6F1(M01479), POU6F1(M01462)	1.6256e-18	-8.97023	8.93907	969759	1413404	0.406789	0.592887
E2F-1:DP-1(M00736)	1.8963e-18	-8.95195	8.92078	970226	1412938	0.406985	0.592691
NF-Y(M00209)	3.9731e-18	-8.86235	8.83119	972433	1410730	0.407911	0.591765
REX1(M01695), Nanog(M01123)	3.3804e-17	-8.6132	8.58203	978616	1404548	0.410504	0.589172
IPF1(M01235), IPF1(M01233)	9.1265e-16	-8.21091	8.17975	988596	1394568	0.414691	0.584986
RFX1(M00626)	6.5243e-15	-7.97026	7.9391	994536	1388627	0.417183	0.582494
HOXB8(M01451)	1.1308e-14	-7.89872	7.86755	996303	1386861	0.417924	0.581753
APOLYA(M00310)	2.3874e-14	-7.79965	7.76849	998757	1384406	0.418953	0.580723
Nrf-2(M00821)	6.4971e-13	-7.35561	7.32445	1009758	1373406	0.423568	0.576109
KAISO(M01119)	1.3689e-12	-7.25146	7.2203	1012338	1370825	0.42465	0.575026
Neuro(M01287), MyoD(M00184), myogenin(M00712)	2.7486e-12	-7.15353	7.12225	1015459	1367704	0.425959	0.573717
hbp1(M01661)	3.1689e-12	-7.13206	7.10089	1015311	1367853	0.425897	0.573779
HNF1(M00790)	2.5475e-11	-6.83172	6.80055	1022736	1360428	0.429012	0.570665
MRG2(M01395)	6.4034e-11	-6.69636	6.66519	1026088	1357076	0.430418	0.569259

## Sheet: SOX2-BRN2 TRANSFAC Motifs THEME
Motifs	min P-value	CV Error	Unrefined Hypothesis	Refined Hypothesis	PWM Score Threshold
Oct-1(M00135), Oct-1(M00161), OCT-x(M00210), Oct-1(M00248), Oct-1(M00342), POU3F2(M00464), Oct-2(M01368), POU2F3(M01476)	3.12e-79	0.38	....wTATGCAAAT.y...	....wtATGCAAAT.....	0.75
Oct-1(M00930), Oct-1(M00138), Oct-1(M00162), Oct-1(M00195), TEF(M00672), Octamer(M00795)	5.25e-52	0.38	t.aTTt.CAT.	t.aTTtgCAT.	0.75
SOX2(M01272), SOX5(M00042), SRY(M00160), SOX9(M00410), SOX4(M01308)	3.12e-51	0.37	....cCwTTGTtwtk.	....cCwTTGT.wtk.	0.76
SMAD1(M01590), SOX(M01014), Oct-4(M01124), Oct-4(M01125), Nanog(M01247), TCF-3(M01594)	4.83e-51	0.39	.a.rAsAAarg.	.a.rAsAAarg.	0.75
Octamer(M01324), POU3F2(M00463)	1.03e-44	0.38	.a..taTGCATAa...a	.a..taTGCATAa...a	0.7
Oct-1(M00136), Oct-2(M01761)	3.59e-33	0.39	..gaATATkCa....	..gaaTATkCa....	0.73
E2F-1(M00430)	4.99e-33	0.41	.TTsGCGG	.TTsSCGS	0.79
NKX6.1(M01489), Prop-1(M01320), OTP(M01323), Isl2(M01328), Vsx1(M01335), HOXA7(M01336), Lhx5(M01353), PMX2B(M01356), lmx1b(M01363), Lhx9(M01367), HOXC4(M01369), HOXA4(M01370), HOXC6(M01406), Lmx-1(M01409), Alx-4(M01417), Lim-1(M01418), Ncx(M01420), HOXB4(M01424), HOXD8(M01432), OG-2(M01441), HOXC5(M01454), Uncx-4.1(M01458), Lhx3(M01471), Octamer(M01477)	5.83e-33	0.4	...aaTTAATTA....s	....atTAATka.....	0.7
LEF1(M00805), LEF-1(M02019), TCF-4(M02033)	1.08e-30	0.44	TCAAAG	wCAAaG	0.79
S8(M01376), lhx6.1(M01314), LH-2(M01325), Pax-7(M01339), K-2b(M01348), ALX-3(M01355), CART1(M01362), Pax-4(M01385), Evx2(M01386), Lhx4(M01421), lhx6.1(M01422), Arx(M01423), PSX1(M01435), Lhx8(M01440), PMX2A(M01444), CART1(M01453), Esx1(M01474)	1.77e-30	0.43	a..gcTAATTAgy....	a..gcTAATTAgy....	0.72
CTF1(M01196), NF-1(M00193), NF-1(M00806)	2.73e-27	0.41	TGGCAs...GCCAA	TGGCAs...GCCAA	0.76
IPF1(M01255), IPF1(M00436), IPF1(M01013), IPF1(M01236), Hoxd9(M01834)	8.83e-27	0.41	.swcATTAA.a.	...cATTaA.a.	0.76
Nkx6-3(M01470), Brn-2(M00145), POU6F1(M00465), Lhx3a(M00510), (Prop-1)2(M01294), Oct-6(M01316), Oct-1(M01354), Dbx-2(M01360), pax6(M01391), HB24(M01399), Brn-3c(M01408), Shox2(M01415), Barx-2(M01431), Pit-1(M01465), NKX6.1(M01469), Brn-4(M01473), LHX3b(M01971)	2.16e-26	0.4	...watTAATkA.t...	....atTAATka.....	0.71
RFX1(M00281), HIC1(M01072), HIC1(M01073)	1.1e-25	0.44	..gk.rc...rGyAAC..	..gk.rc...rG.AAC..	0.73
c-ets-1(M01986), Elk-1(M00025), c-Ets-1(p54)(M00032), c-Ets-1(M01078), Elk-1(M01165), SAP-1a(M01167), GABP(M01258), ELF1(M01975), ELF2(M01976), ELF3(M01977), ELF4(M01979), ELK-1(M01981), Net(M01982), SAP1A(M01983), ERF(M01984), ERG(M01985), ER81(M01987), ER71(M01988), Ets2(M01989), ETV3(M01990), PEA3(M01991), Erm(M01992), TEL1(M01993), Pet-1(M02037), Fli-1(M02038), GABPalpha(M02039), PDEF(M02040)…	2.61e-25	0.44	rcCGGAwry.	rccGGAwry.	0.74
IPF1(M01235), ISL1(M01127), IPF1(M01233), IPF1(M01234)	1.95e-23	0.44	.ssTAATTAs	.ssTAATTAs	0.8
E2F-1(M00939), E2F(M00024), E2F(M00516), E2F(M00918), E2F(M00919), E2F(M00920)	2.21e-22	0.44	tTTsGCGsg	yTtsGCGsg	0.78
HOXA3(M01337), Cart-1(M00416), HoxB5(M01319), HOXC-8(M01321), GSH2(M01326), HOXD3(M01338), Barx1(M01340), dlx5(M01388), HOXA6(M01392), Vax-1(M01397), dlx3(M01400), HoxA2(M01402), ipf1(M01438), Dlx-1(M01439), Bsx(M01442), Mox1(M01443), HOXD1(M01448), HOXA5(M01452), HOXB6(M01460), Dlx-2(M01468), Dlx7(M01486), HOXA1(M01487)	3.22e-22	0.41	....r.TAATTAry	....g.TAATTAry	0.74
TGIF(M00418), TGIF1(M01346), MRG2(M01395), TGIF2(M01407), PKNOX2(M01411), Meis1(M01419), PREP1(M01459), Meis2(M01488)	1.96e-20	0.42	a.cTGTCA..a	..cTGTCA...	0.74
AP-4(M00927), AP-4(M00175), AP-4(M00176), NeuroD(M01288), MYF(M01302), AP4(M01860)	1.08e-19	0.43	r.CaGcTGc	r.CaGcTGc	0.81
Msx-1(M01412), Vax-2(M01327), HOXB3(M01330), isx(M01331), Nkx1-1(M01334), HB9(M01349), Gbx1(M01371), Gbx2(M01382), rax(M01389), Msx-2(M01393), HOXA7(M01394), HOXB7(M01396), Lbx2(M01401), Nkx1-2(M01427), En-2(M01455), EMX2(M01461), Evx-1(M01475)	6e-19	0.42	....a.YAATTA.t..	....r.yAATTa.t..	0.7
RFX(M00975)	2.32e-17	0.43	syGWTGcs.	syGwTGcs.	0.83
S8(M00099), Nkx6-1(M00424), Barhl-1(M01332), Msx-3(M01341), En-1(M01365), Barhl2(M01446)	6.71e-17	0.41	......yAATTA....	......yaATTA....	0.74
CHX10(M00437), Nkx2-5(M00241), HOXA4(M00640), OG-2(M01162), DRI1(M01654)	1.15e-15	0.42	...TAATTAGc...	...TAATTAGc...	0.76
NMYC(M01808), E47(M00071), MyoD(M00184), E12(M00693), myogenin(M00712), E2A(M00973), TAL1(M00993), Neuro(M01287), MATH1(M01716), HTF4(M02018)	3.42e-15	0.44	CA.cTG	CA.cTG	0.77
POU6F1(M01479), POU6F1(M01462)	4.02e-15	0.44	....wTAATgAGst...	....wTAATgAG.t...	0.72
SATB1(M02030), MEF-2C(M02025), MEF-2D(M02026)	7.03e-15	0.44	wATTTy	wATTTy	0.81
SOX9(M01284), TCF-4(M00671), LEF1(M01022)	9.09e-15	0.43	r.aCARaGgs.	r.aCARaGss.	0.82
POU1F1(M00744), Cdx-2(M01659)	9.54e-14	0.43	aTG.ATaWww	aTG.ATawwt	0.8
C/EBP(M00201), C/EBPbeta(M00109), C/EBPdelta(M00621)	1.27e-13	0.44	.gwmTk.kGyAAk..ay.	.g.mTk.kGyAAk..my.	0.8
HEB(M00698), LBP-1(M00644), CBF1(M01727)	3.11e-13	0.43	rCCwGCTG	rCCwGCTG	0.79
FOXP3(M01599), XFD-1(M00267), XFD-2(M00268), HFH3(M00289), Freac-7(M00293), HFH8(M00294)	3.15e-13	0.44	ryAAACAa	ryAAACA.	0.74
Tal-1beta:ITF-2(M00070), Tal-1beta:E47(M00065), Tal-1alpha:E47(M00066), RP58(M00532)	7.93e-13	0.44	...amCAGATGkY...	...amCAGATGky...	0.76
ZNF333(M01230)	2.66e-12	0.45	ATAAT	ATAAT	0.77
Zec(M01081)	9.64e-12	0.45	CAAGGTTGGTTGC	caaGgttGGTTGC	0.79
E2F(M00425), E2F(M00050), E2F(M00426), E2F(M00427), E2F-1:DP-1(M00736), E2F-4:DP-1(M00738), E2F-4:DP-2(M00739), Rb:E2F-1:DP-1(M00740)	9.77e-12	0.43	tTTSGCGS	tTTsGCGs	0.79
NF-AT4(M01886), CIZ(M00734), HMG(M00750), Helios(M01004)	1.98e-11	0.46	GGAAAm	GGAAA.	0.77
REX1(M01695), TCF11(M00285), NF-muE1(M00651), YY1(M01035), Nanog(M01123)	2.96e-10	0.43	GCAGCCATTA	GCAGCCATTa	0.78
MyoD(M00001), Lmo2(M00277), TFE(M01029)	8.38e-10	0.45	sraCAGGTGkyg	srrCAGsTGkyg	0.83
KAISO(M01119)	1.59e-09	0.43	.TCCTGC.A.	.tCCTGC.A.	0.78
Nrf-2(M00821)	1.65e-09	0.46	.tGctgAGTCAk.	.tSctgAGTCAk.	0.78
MEIS1(M00419)	2.6e-09	0.43	...TGACAG...	...TGaCAg...	0.76
NF-Y(M00209), CCAAT(M00254), alpha-CP1(M00687)	2.73e-09	0.45	.cTGATTGGytasy	.cTGATTGGytrsy	0.8
HEN1(M00068), HEN1(M00058)	2.85e-09	0.47	...GG.C.CAGcTGcg.ccc..	...gg.c.CAgcTGck.cc...	0.72
COMP1(M00057)	3.31e-09	0.45	.st.wkSATTGrC.rsra.mrr..	.s..wksatTGrC.rsra.m.r..	0.8
RFX1(M00626), MIF-1(M00279), RFX1(M00280)	3.44e-09	0.45	mRWYRCyaKGSaAm	mrwyrcyakGsaam	0.83
FOXO1(M01968), FOXO4(M00472), HNF3alpha(M00724), FOXO1(M01216), HNF-3beta(M02014), HNF-3gamma(M02015)	5.51e-09	0.44	TGTTkAC	TGTTkAC	0.77
v-Myb(M00227), c-Myb(M00004)	6.9e-09	0.44	..yAACGGy	..yAACgGm	0.8
HOXB8(M01451), FOXJ2(M00423), HOXC9(M01416), SATB1(M01723)	9.15e-09	0.43	....GyaATTAaya..	....gymATtAaya..	0.69
Ik-3(M00088)	1.71e-08	0.46	k.ytGGGAAYacc	k.yygGGAAyrcy	0.81
EHF(M01974), Tel-2(M00678), ESE1(M01214), TR4(M01776)	2.71e-08	0.45	csmGGAAry.	csmGGAAry.	0.73
Pbx(M01967)	3.36e-08	0.44	.kTGAkTGRCrk..	..TGakTGrCrk..	0.76
AhR(M00778), Whn(M00332)	3.88e-08	0.45	.t.GCGTG...	.k.GCGTG...	0.75
STAT1:STAT1(M01212), STAT3(M01595)	1.08e-07	0.45	.TTTCcmgGAAra	.TTTCcmgGaAra	0.79
HNF-1A(M02013), Pit-1(M00802)	1.23e-07	0.45	rGTTAaT.wtt	.gtTAaT.wtt	0.7
APOLYA(M00310)	1.29e-07	0.44	AATAAAcgCC.WTTk	AATAAAcgCC.wTTk	0.78
HLF(M00260), ATF2(M00040), E4BP4(M00045)	2.03e-07	0.45	RTTACrymAt	rTTacrymAt	0.8
E47(M00002), AP-4(M00005), E2A(M00804), MyoD(M00929)	2.71e-07	0.45	ss.GCAGgTGk.c..	ss.GCAGsTGk....	0.79
hbp1(M01661)	4.55e-07	0.45	.TCAATsar	.TCAaTsrr	0.81
Rhox11(M01384), Rhox11(M01347)	7.44e-07	0.45	a...cGcTGTwaw....	.....GcTGTwaw....	0.73
DMRT2(M01147), DMRT1(M01146), DMRT3(M01148), DMRT4(M01149), DMRT5(M01150), DMRT7(M01151)	9.66e-07	0.45	.AwWtTGaTACATTgW	.arwttGmTaCAtTgw	0.81
REX1(M01696), TEF-1(M00704)	1.09e-06	0.44	gCCATTA	gCCATTa	0.77
Freac-2(M00290)	5.79e-06	0.47	..a..GTAAACAa...	..a..gTAAACAa...	0.74

## Sheet: DE Factors
GeneName	ES1.CEL_as_ESC_1	ES2.CEL_as_ESC_2	ES3.CEL_as_ESC_3	NP106.CEL_as_NPC_1	NP107.CEL_as_NPC_2	NP39.CEL_as_NPC_3	ESC.mean	NPC.mean	NPC-ESC.diff	NPC-ESC.MWT	NPC-ESC.FDR
Rfx2	7.07686	6.91683	6.86199	5.00956	4.66537	4.80791	6.95189	4.82761	-2.12428	18.3452	2.33695e-06
Rfx3	4.98723	5.13418	4.94332	5.73205	5.57153	5.82456	5.02158	5.70938	0.687802	-6.68753	0.000369489
Rfx4	3.55219	3.57022	3.85246	8.07987	7.69638	9.28728	3.65829	8.35451	4.69622	-13.7709	2.22926e-05
Rfx7	7.1886	7.50531	7.33438	8.70705	9.0437	8.74546	7.34276	8.83207	1.48931	-11.6228	1.97918e-05
Nfia	3.86048	4.1919	4.41478	8.0975	8.22253	8.39927	4.15572	8.23977	4.08404	-26.684	5.04842e-07
Nfib	4.56725	4.72298	4.68698	8.34848	8.26247	8.79951	4.65907	8.47015	3.81108	-26.499	1.17252e-06
Nfix	4.70977	4.4953	4.46855	7.93368	8.02472	7.87152	4.55787	7.94331	3.38543	-33.6137	1.88799e-07
