# Supplementary material for: SOX2 Co-Occupies Distal Enhancer Elements with Distinct POU Factors in ESCs and NPCs to Specify Cell State
Source: PLoS Genet. 2013 Feb 21;9(2):e1003288. doi: 10.1371/journal.pgen.1003288 (PMC3578749; doi:10.1371/journal.pgen.1003288)
Supplement: Table S11 — qRT-PCR primers used to assay for gene expression in TetO-Brn2 and control cells. (XLSX) [file pgen.1003288.s016.xlsx]

## Sheet: Key
Table S11
Sequence of qRT-PCR primers used test expression of genes linked to ectopic BRN2-SOX2 regions in TetO-Brn2 cells
Referred to in Figure 4

## Sheet: Primers
Target	Forward (5'-3')	Reverse (5'-3')
Oct4	ACATCGCCAATCAGCTTGG	AGAACCATACTCGAACCACATCC
Sox2	ACAGATGCAACCGATGCACC	TGGAGTTGTACTGCAGGGCG
Nestin	TCTACAGGCAGCGCTAACAGTC	TCCCCTAACTCATCTGCCTCAC
Sox1	AGTGGAAGGTCATGTCCGAGG	GCCAGCGAGTACTTGTCCTTCTT
Brn2	AGCAGTTCGCCAAGCAATTC	CGAGAACACGTTGCCGTACA
GapDH	TTCACCACCATGGAGAAGGC	CCCTTTTGGCTCCACCCT
Apba2	ACGGACAGAGTGTGGTAGCC	CGTGAGGAGCCTAAACATGG
Cops2	CTGATGTGGAGAGCTTGCTG	CACCCCTCTTCTGATGATCC
Id4	ACTCACCCTGCTTTGCTGAG	AGAATGCTGTCACCCTGCTT
Kirrel3	TGTGCCATCCCTGAATATGA	TGCTCTCCTGAGAGGTGGTT
Lemd1	ATTCACACCTGGCCCAATAC	TCACTGTCATCGCTGTCCTC
Lrrn1	GTCCTCATCCTCCGGCTAGT	CACAGGTCCTTGTGGGAGTT
